# Supplementary material for: Optochemical profiling of receptor-proximal proteins in vivo in minutes
Source: Research Square preprint supplement (doi:10.21203/rs.3.rs-3418321/v1), 2023-11-14
Supplement: Supplementary file 1 [file 093bdbc7fe194111e15338ca.xlsx]

## Sheet: Legend
Supplementary Table 7
Proteomics data for PhoxID targeting AMPAR-proximal proteins in acute cortical/hippocampal slices (n=1 biological replicates x 2 technical replicates)
Sheet name	Description	Comments
S7-1	Hit proteins only
S7-2	All detected proteins	Proteins with unique peptides <3 are excluded from this list

## Sheet: S7-1. Hit proteins only
UniProt ID	Protein	Gene	# PSMs	# unique peptides	Fold change: Light (+) vs. (–)	Abundances (Grouped): Light(–)	Abundances (Grouped): Light(+)
P15116	Cadherin-2	Cdh2	52	14	22.168	733584	1.64364e+07
Q9WTR5	Cadherin-13	Cdh13	20	5	19.182	297125	5.72852e+06
Q9Z2W9	Glutamate receptor 3	Gria3	128	26	18.502	2.67561e+06	4.74035e+07
Q9QZF2	Glypican-1	Gpc1	19	11	15.983	104178	1.48843e+06
Q810U4	Neuronal cell adhesion molecule	Nrcam	66	23	14.985	1.19368e+06	1.64378e+07
Q9D1T0	Leucine-rich repeat and immunoglobulin-like domain-containing nogo receptor-interacting protein 1	Lingo1	56	12	14.909	1.16722e+06	2.29207e+07
Q8CGM1	Adhesion G protein-coupled receptor B2	Adgrb2	6	4	14.786	132332	1.75468e+06
P97291	Cadherin-8	Cdh8	12	6	14.649	53487.4	783541
Q7M6Z0	Reticulon-4 receptor-like 2	Rtn4rl2	9	4	14.574	97873.4	1.4661e+06
Q63912	Oligodendrocyte-myelin glycoprotein	Omg	25	8	14.155	585944	1.04888e+07
O88998	Noelin	Olfm1	44	9	14.07	7.40993e+06	3.48616e+07
Q8R464	Cell adhesion molecule 4	Cadm4	40	11	13.928	809087	1.29769e+07
P29416	Beta-hexosaminidase subunit alpha	Hexa	8	3	13.437	41978.1	564052
Q68FM6	Protein phosphatase 1 regulatory subunit 29	Elfn2	13	3	13.242	39075.1	517421
Q8BM13	Noelin-2	Olfm2	22	6	13.222	419059	6.50027e+06
Q8BYM5	Neuroligin-3	Nlgn3	21	7	12.975	167768	1.99671e+06
P23819	Glutamate receptor 2	Gria2	168	37	12.872	7.32854e+06	8.22712e+07
Q6WVG3	BTB/POZ domain-containing protein KCTD12	Kctd12	10	3	12.831	77525.8	994705
Q9WTT4	V-type proton ATPase subunit G 2	Atp6v1g2	10	3	12.785	56237	719007
Q9CPW0	Contactin-associated protein-like 2	Cntnap2	72	26	12.779	1.35884e+06	1.69744e+07
Q69ZK9	Neuroligin-2	Nlgn2	55	15	12.646	974712	1.22659e+07
Q80XG9	Leucine-rich repeat transmembrane neuronal protein 4	Lrrtm4	33	8	12.646	446320	4.81558e+06
Q71M36	Chondroitin sulfate proteoglycan 5	Cspg5	16	7	12.643	246549	2.63685e+06
Q6DFY8	BMP/retinoic acid-inducible neural-specific protein 2	Brinp2	9	4	12.587	84862.2	814445
Q8BLU0	Leucine-rich repeat transmembrane protein FLRT2	Flrt2	7	4	12.249	37084.8	454253
Q9Z2W8	Glutamate receptor 4	Gria4	64	15	12.215	399075	4.34531e+06
Q61739	Integrin alpha-6	Itga6	9	5	11.887	21607	256847
Q99PI8	Reticulon-4 receptor	Rtn4r	18	8	11.504	438418	4.81129e+06
Q8R4F1	Netrin-G2	Ntng2	26	12	11.309	462528	4.77838e+06
Q8C031	Leucine-rich repeat-containing protein 4C	Lrrc4c	18	4	11.018	270435	2.47256e+06
P55288	Cadherin-11	Cdh11	13	8	10.92	242573	2.1039e+06
Q62443	Neuronal pentraxin-1	Nptx1	46	14	10.835	1.46083e+06	1.38823e+07
Q9DCZ4	MICOS complex subunit Mic26	Apoo	12	4	10.819	35439.4	383429
Q80TS3	Adhesion G protein-coupled receptor L3	Adgrl3	13	6	10.529	108242	1.05584e+06
Q9JIA1	Leucine-rich glioma-inactivated protein 1	Lgi1	32	11	10.519	1.68638e+06	1.28507e+07
Q3URE9	Leucine-rich repeat and immunoglobulin-like domain-containing nogo receptor-interacting protein 2	Lingo2	15	4	10.499	186051	1.75727e+06
Q9Z1L5	Voltage-dependent calcium channel subunit alpha-2/delta-3	Cacna2d3	36	17	10.321	513130	5.00106e+06
B0V2N1	Receptor-type tyrosine-protein phosphatase S	Ptprs	43	11	10.27	204114	2.12701e+06
P11627	Neural cell adhesion molecule L1	L1cam	70	22	10.122	4.80619e+07	7.69748e+07
Q9D8B7	Junctional adhesion molecule C	Jam3	10	3	10.088	109326	1.10291e+06
Q9Z218	Dipeptidyl aminopeptidase-like protein 6	Dpp6	52	20	9.982	1.65124e+06	1.3335e+07
Q8CJH3	Plexin-B1	Plxnb1	44	20	9.968	584100	5.17117e+06
P04925	Major prion protein	Prnp	16	3	9.843	154000	3.28815e+06
Q8BYI9	Tenascin-R	Tnr	227	36	9.768	1.27024e+07	1.25844e+08
P09055	Integrin beta-1	Itgb1	23	10	9.703	581193	5.36968e+06
Q8BGA3	Leucine-rich repeat transmembrane neuronal protein 2	Lrrtm2	24	10	9.648	428684	4.98891e+06
Q9WV54	Acid ceramidase	Asah1	26	12	9.59	900965	5.48191e+06
Q8BGN3	Glycerophosphocholine cholinephosphodiesterase ENPP6	Enpp6	39	12	9.235	552811	5.50435e+06
Q62059	Versican core protein	Vcan	45	12	9.172	996998	9.3525e+06
Q6PHS9	Voltage-dependent calcium channel subunit alpha-2/delta-2	Cacna2d2	31	15	8.981	400847	2.87162e+06
Q9ESN4	Complement C1q-like protein 3	C1ql3	6	3	8.965	28607.8	256471
Q62351	Transferrin receptor protein 1	Tfrc	11	8	8.905	34648.8	308554
P53811	Phosphatidylinositol transfer protein beta isoform	Pitpnb	3	3	8.781	64476.1	566187
P62812	Gamma-aminobutyric acid receptor subunit alpha-1	Gabra1	16	6	8.777	863079	5.23943e+06
O88507	Ciliary neurotrophic factor receptor subunit alpha	Cntfr	34	10	8.764	802139	8.28345e+06
Q6VNS1	NT-3 growth factor receptor	Ntrk3	27	6	8.728	344437	3.39006e+06
Q99J85	Neuronal pentraxin receptor	Nptxr	22	8	8.708	1.08314e+06	4.55778e+06
Q8K377	Leucine-rich repeat transmembrane neuronal protein 1	Lrrtm1	11	6	8.694	289656	2.60978e+06
Q61330	Contactin-2	Cntn2	58	23	8.456	1.69416e+06	1.44963e+07
Q99N28	Cell adhesion molecule 3	Cadm3	27	9	8.336	1.8175e+06	1.43664e+07
P22723	Gamma-aminobutyric acid receptor subunit gamma-2	Gabrg2	8	3	8.272	162904	1.22493e+06
P39087	Glutamate receptor ionotropic, kainate 2	Grik2	28	8	8.051	359014	3.26547e+06
P20917	Myelin-associated glycoprotein	Mag	79	14	7.965	5.58579e+06	4.67028e+07
P35436	Glutamate receptor ionotropic, NMDA 2A	Grin2a	30	10	7.96	220256	1.96683e+06
Q68FD9	UPF0606 protein KIAA1549	Kiaa1549	11	5	7.906	43421.7	343279
Q810U3	Neurofascin	Nfasc	68	24	7.882	3.2499e+06	2.50495e+07
Q9R1V6	Disintegrin and metalloproteinase domain-containing protein 22	Adam22	27	9	7.805	1.03522e+06	6.64802e+06
Q8R4G0	Netrin-G1	Ntng1	11	5	7.761	188139	1.23113e+06
B5TVM2	Immunoglobulin-like domain-containing receptor 2	Ildr2	25	10	7.723	190525	1.44812e+06
P35438	Glutamate receptor ionotropic, NMDA 1	Grin1	58	19	7.689	2.64022e+06	2.08695e+07
P12960	Contactin-1	Cntn1	303	42	7.679	1.55103e+07	1.31001e+08
Q8VDD5	Myosin-9	Myh9	25	6	7.672	36009.3	276258
P23818	Glutamate receptor 1	Gria1	83	16	7.65	1.68206e+06	1.68082e+07
Q8R5M8	Cell adhesion molecule 1	Cadm1	20	8	7.473	872528	6.14866e+06
Q8VHY0	Chondroitin sulfate proteoglycan 4	Cspg4	43	21	7.47	221618	1.40016e+06
Q9D5T0	Outer mitochondrial transmembrane helix translocase	Atad1	13	6	7.434	32993.4	245283
Q9R1V4	Disintegrin and metalloproteinase domain-containing protein 11	Adam11	11	4	7.426	160708	1.10071e+06
Q03137	Ephrin type-A receptor 4	Epha4	12	6	7.342	118990	711201
P12382	ATP-dependent 6-phosphofructokinase, liver type	Pfkl	57	13	7.262	1.473e+06	3.30701e+07
Q8K406	Leucine-rich repeat LGI family member 3	Lgi3	16	10	7.232	235155	1.50431e+06
Q61490	CD166 antigen	Alcam	62	16	7.12	2.40482e+06	1.5436e+07
O35136	Neural cell adhesion molecule 2	Ncam2	82	23	7.04	3.15211e+06	2.25835e+07
Q60625	Intercellular adhesion molecule 5	Icam5	143	18	7.009	8.93667e+06	6.24918e+07
O54991	Contactin-associated protein 1	Cntnap1	67	22	7.001	1.2369e+06	5.74907e+06
Q9QWY8	Arf-GAP with SH3 domain, ANK repeat and PH domain-containing protein 1	Asap1	9	3	6.94	28415	197193
Q9R1V7	Disintegrin and metalloproteinase domain-containing protein 23	Adam23	27	11	6.836	1.01266e+06	7.15277e+06
Q61207	Prosaposin	Psap	5	4	6.732	103109	409395
Q8BLF1	Neutral cholesterol ester hydrolase 1	Nceh1	11	6	6.668	24402	162711
P47962	60S ribosomal protein L5	Rpl5	8	3	6.617	42668.8	282349
P50428	Arylsulfatase A	Arsa	26	7	6.579	177751	1.17688e+06
Q91ZX7	Prolow-density lipoprotein receptor-related protein 1	Lrp1	137	55	6.554	2.9159e+07	4.47389e+07
P0C192	Leucine-rich repeat-containing protein 4B	Lrrc4b	20	7	6.41	256108	2.07893e+06
P28571	Sodium- and chloride-dependent glycine transporter 1	Slc6a9	8	3	6.385	49729	317500

## Sheet: S7-2. All detected proteins 
UniProt ID	Protein	Gene	# PSMs	# unique peptides	Fold change: Light (+) vs. (–)	Abundances (Grouped): Light(+(	Abundances (Grouped): Light(–)
P15116	Cadherin-2	Cdh2	52	14	22.168	733584	1.64364e+07
Q9WTR5	Cadherin-13	Cdh13	20	5	19.182	297125	5.72852e+06
Q9Z2W9	Glutamate receptor 3	Gria3	128	26	18.502	2.67561e+06	4.74035e+07
Q9QZF2	Glypican-1	Gpc1	19	11	15.983	104178	1.48843e+06
Q810U4	Neuronal cell adhesion molecule	Nrcam	66	23	14.985	1.19368e+06	1.64378e+07
Q9D1T0	Leucine-rich repeat and immunoglobulin-like domain-containing nogo receptor-interacting protein 1	Lingo1	56	12	14.909	1.16722e+06	2.29207e+07
Q8CGM1	Adhesion G protein-coupled receptor B2	Adgrb2	6	4	14.786	132332	1.75468e+06
P97291	Cadherin-8	Cdh8	12	6	14.649	53487.4	783541
Q7M6Z0	Reticulon-4 receptor-like 2	Rtn4rl2	9	4	14.574	97873.4	1.4661e+06
Q63912	Oligodendrocyte-myelin glycoprotein	Omg	25	8	14.155	585944	1.04888e+07
O88998	Noelin	Olfm1	44	9	14.07	7.40993e+06	3.48616e+07
Q8R464	Cell adhesion molecule 4	Cadm4	40	11	13.928	809087	1.29769e+07
P29416	Beta-hexosaminidase subunit alpha	Hexa	8	3	13.437	41978.1	564052
Q68FM6	Protein phosphatase 1 regulatory subunit 29	Elfn2	13	3	13.242	39075.1	517421
Q8BM13	Noelin-2	Olfm2	22	6	13.222	419059	6.50027e+06
Q8BYM5	Neuroligin-3	Nlgn3	21	7	12.975	167768	1.99671e+06
P23819	Glutamate receptor 2	Gria2	168	37	12.872	7.32854e+06	8.22712e+07
Q6WVG3	BTB/POZ domain-containing protein KCTD12	Kctd12	10	3	12.831	77525.8	994705
Q9WTT4	V-type proton ATPase subunit G 2	Atp6v1g2	10	3	12.785	56237	719007
Q9CPW0	Contactin-associated protein-like 2	Cntnap2	72	26	12.779	1.35884e+06	1.69744e+07
Q69ZK9	Neuroligin-2	Nlgn2	55	15	12.646	974712	1.22659e+07
Q80XG9	Leucine-rich repeat transmembrane neuronal protein 4	Lrrtm4	33	8	12.646	446320	4.81558e+06
Q71M36	Chondroitin sulfate proteoglycan 5	Cspg5	16	7	12.643	246549	2.63685e+06
Q6DFY8	BMP/retinoic acid-inducible neural-specific protein 2	Brinp2	9	4	12.587	84862.2	814445
Q8BLU0	Leucine-rich repeat transmembrane protein FLRT2	Flrt2	7	4	12.249	37084.8	454253
Q9Z2W8	Glutamate receptor 4	Gria4	64	15	12.215	399075	4.34531e+06
Q61739	Integrin alpha-6	Itga6	9	5	11.887	21607	256847
Q99PI8	Reticulon-4 receptor	Rtn4r	18	8	11.504	438418	4.81129e+06
Q8R4F1	Netrin-G2	Ntng2	26	12	11.309	462528	4.77838e+06
Q8C031	Leucine-rich repeat-containing protein 4C	Lrrc4c	18	4	11.018	270435	2.47256e+06
P55288	Cadherin-11	Cdh11	13	8	10.92	242573	2.1039e+06
Q62443	Neuronal pentraxin-1	Nptx1	46	14	10.835	1.46083e+06	1.38823e+07
Q9DCZ4	MICOS complex subunit Mic26	Apoo	12	4	10.819	35439.4	383429
Q80TS3	Adhesion G protein-coupled receptor L3	Adgrl3	13	6	10.529	108242	1.05584e+06
Q9JIA1	Leucine-rich glioma-inactivated protein 1	Lgi1	32	11	10.519	1.68638e+06	1.28507e+07
Q3URE9	Leucine-rich repeat and immunoglobulin-like domain-containing nogo receptor-interacting protein 2	Lingo2	15	4	10.499	186051	1.75727e+06
Q9Z1L5	Voltage-dependent calcium channel subunit alpha-2/delta-3	Cacna2d3	36	17	10.321	513130	5.00106e+06
B0V2N1	Receptor-type tyrosine-protein phosphatase S	Ptprs	43	11	10.27	204114	2.12701e+06
P11627	Neural cell adhesion molecule L1	L1cam	70	22	10.122	4.80619e+07	7.69748e+07
Q9D8B7	Junctional adhesion molecule C	Jam3	10	3	10.088	109326	1.10291e+06
Q9Z218	Dipeptidyl aminopeptidase-like protein 6	Dpp6	52	20	9.982	1.65124e+06	1.3335e+07
Q8CJH3	Plexin-B1	Plxnb1	44	20	9.968	584100	5.17117e+06
P04925	Major prion protein	Prnp	16	3	9.843	154000	3.28815e+06
Q8BYI9	Tenascin-R	Tnr	227	36	9.768	1.27024e+07	1.25844e+08
P09055	Integrin beta-1	Itgb1	23	10	9.703	581193	5.36968e+06
Q8BGA3	Leucine-rich repeat transmembrane neuronal protein 2	Lrrtm2	24	10	9.648	428684	4.98891e+06
Q9WV54	Acid ceramidase	Asah1	26	12	9.59	900965	5.48191e+06
Q8BGN3	Glycerophosphocholine cholinephosphodiesterase ENPP6	Enpp6	39	12	9.235	552811	5.50435e+06
Q62059	Versican core protein	Vcan	45	12	9.172	996998	9.3525e+06
Q6PHS9	Voltage-dependent calcium channel subunit alpha-2/delta-2	Cacna2d2	31	15	8.981	400847	2.87162e+06
Q9ESN4	Complement C1q-like protein 3	C1ql3	6	3	8.965	28607.8	256471
Q62351	Transferrin receptor protein 1	Tfrc	11	8	8.905	34648.8	308554
P53811	Phosphatidylinositol transfer protein beta isoform	Pitpnb	3	3	8.781	64476.1	566187
P62812	Gamma-aminobutyric acid receptor subunit alpha-1	Gabra1	16	6	8.777	863079	5.23943e+06
O88507	Ciliary neurotrophic factor receptor subunit alpha	Cntfr	34	10	8.764	802139	8.28345e+06
Q6VNS1	NT-3 growth factor receptor	Ntrk3	27	6	8.728	344437	3.39006e+06
Q99J85	Neuronal pentraxin receptor	Nptxr	22	8	8.708	1.08314e+06	4.55778e+06
Q8K377	Leucine-rich repeat transmembrane neuronal protein 1	Lrrtm1	11	6	8.694	289656	2.60978e+06
Q61330	Contactin-2	Cntn2	58	23	8.456	1.69416e+06	1.44963e+07
Q99N28	Cell adhesion molecule 3	Cadm3	27	9	8.336	1.8175e+06	1.43664e+07
P22723	Gamma-aminobutyric acid receptor subunit gamma-2	Gabrg2	8	3	8.272	162904	1.22493e+06
P39087	Glutamate receptor ionotropic, kainate 2	Grik2	28	8	8.051	359014	3.26547e+06
P20917	Myelin-associated glycoprotein	Mag	79	14	7.965	5.58579e+06	4.67028e+07
P35436	Glutamate receptor ionotropic, NMDA 2A	Grin2a	30	10	7.96	220256	1.96683e+06
Q68FD9	UPF0606 protein KIAA1549	Kiaa1549	11	5	7.906	43421.7	343279
Q810U3	Neurofascin	Nfasc	68	24	7.882	3.2499e+06	2.50495e+07
Q9R1V6	Disintegrin and metalloproteinase domain-containing protein 22	Adam22	27	9	7.805	1.03522e+06	6.64802e+06
Q8R4G0	Netrin-G1	Ntng1	11	5	7.761	188139	1.23113e+06
B5TVM2	Immunoglobulin-like domain-containing receptor 2	Ildr2	25	10	7.723	190525	1.44812e+06
P35438	Glutamate receptor ionotropic, NMDA 1	Grin1	58	19	7.689	2.64022e+06	2.08695e+07
P12960	Contactin-1	Cntn1	303	42	7.679	1.55103e+07	1.31001e+08
Q8VDD5	Myosin-9	Myh9	25	6	7.672	36009.3	276258
P23818	Glutamate receptor 1	Gria1	83	16	7.65	1.68206e+06	1.68082e+07
Q8R5M8	Cell adhesion molecule 1	Cadm1	20	8	7.473	872528	6.14866e+06
Q8VHY0	Chondroitin sulfate proteoglycan 4	Cspg4	43	21	7.47	221618	1.40016e+06
Q9D5T0	Outer mitochondrial transmembrane helix translocase	Atad1	13	6	7.434	32993.4	245283
Q9R1V4	Disintegrin and metalloproteinase domain-containing protein 11	Adam11	11	4	7.426	160708	1.10071e+06
Q03137	Ephrin type-A receptor 4	Epha4	12	6	7.342	118990	711201
P12382	ATP-dependent 6-phosphofructokinase, liver type	Pfkl	57	13	7.262	1.473e+06	3.30701e+07
Q8K406	Leucine-rich repeat LGI family member 3	Lgi3	16	10	7.232	235155	1.50431e+06
Q61490	CD166 antigen	Alcam	62	16	7.12	2.40482e+06	1.5436e+07
O35136	Neural cell adhesion molecule 2	Ncam2	82	23	7.04	3.15211e+06	2.25835e+07
Q60625	Intercellular adhesion molecule 5	Icam5	143	18	7.009	8.93667e+06	6.24918e+07
O54991	Contactin-associated protein 1	Cntnap1	67	22	7.001	1.2369e+06	5.74907e+06
Q9QWY8	Arf-GAP with SH3 domain, ANK repeat and PH domain-containing protein 1	Asap1	9	3	6.94	28415	197193
Q9R1V7	Disintegrin and metalloproteinase domain-containing protein 23	Adam23	27	11	6.836	1.01266e+06	7.15277e+06
Q61207	Prosaposin	Psap	5	4	6.732	103109	409395
Q8BLF1	Neutral cholesterol ester hydrolase 1	Nceh1	11	6	6.668	24402	162711
P47962	60S ribosomal protein L5	Rpl5	8	3	6.617	42668.8	282349
P50428	Arylsulfatase A	Arsa	26	7	6.579	177751	1.17688e+06
Q91ZX7	Prolow-density lipoprotein receptor-related protein 1	Lrp1	137	55	6.554	2.9159e+07	4.47389e+07
P0C192	Leucine-rich repeat-containing protein 4B	Lrrc4b	20	7	6.41	256108	2.07893e+06
P28571	Sodium- and chloride-dependent glycine transporter 1	Slc6a9	8	3	6.385	49729	317500
Q3U1J4	DNA damage-binding protein 1	Ddb1	9	8	6.381	39327.6	250960
B9EKR1	Receptor-type tyrosine-protein phosphatase zeta	Ptprz1	53	13	6.327	2.70495e+06	1.72181e+07
Q9Z2I0	Mitochondrial proton/calcium exchanger protein	Letm1	10	6	6.321	41499.6	262311
O89023	Tripeptidyl-peptidase 1	Tpp1	12	4	6.276	1.34585e+06	8.93005e+06
Q8C3Q5	Protein shisa-7	Shisa7	24	8	6.256	370751	2.4016e+06
Q68ED2	Metabotropic glutamate receptor 7	Grm7	8	5	6.25	137406	853042
Q61626	Glutamate receptor ionotropic, kainate 5	Grik5	30	11	6.165	303697	2.05304e+06
P97370	Sodium/potassium-transporting ATPase subunit beta-3	Atp1b3	18	5	6.125	317655	2.24965e+06
Q99PJ0	Neurotrimin	Ntm	79	11	6.105	6.35187e+06	3.59809e+07
Q8R2Y2	Cell surface glycoprotein MUC18	Mcam	14	6	6.103	260336	1.79554e+06
A2ASQ1	Agrin	Agrn	49	21	6.059	1.79492e+06	6.40929e+06
P21836	Acetylcholinesterase	Ache	15	7	6.04	347736	1.90075e+06
Q9QUR8	Semaphorin-7A	Sema7a	12	6	6.002	62473.5	374980
Q64487	Receptor-type tyrosine-protein phosphatase delta	Ptprd	77	23	5.998	1.70077e+06	1.02683e+07
Q8BLQ9	Cell adhesion molecule 2	Cadm2	39	12	5.998	1.65633e+06	1.15189e+07
B1AS29	Glutamate receptor ionotropic, kainate 3	Grik3	27	11	5.813	380250	2.86022e+06
P97797	Tyrosine-protein phosphatase non-receptor type substrate 1	Sirpa	50	10	5.795	3.19491e+06	2.09266e+07
Q4V9Z5	Seizure 6-like protein 2	Sez6l2	21	8	5.706	188168	1.24774e+06
P51655	Glypican-4	Gpc4	5	3	5.69	156780	740392
Q91VE0	Long-chain fatty acid transport protein 4	Slc27a4	10	5	5.69	35098.4	199694
Q9WV18	Gamma-aminobutyric acid type B receptor subunit 1	Gabbr1	20	9	5.685	235953	1.21638e+06
P19783	Cytochrome c oxidase subunit 4 isoform 1, mitochondrial	Cox4i1	31	7	5.657	2.52023e+06	1.22689e+07
Q8BP67	60S ribosomal protein L24	Rpl24	11	4	5.603	540420	1.42199e+06
Q61292	Laminin subunit beta-2	Lamb2	80	33	5.557	2.74766e+06	1.29061e+07
Q61361	Brevican core protein	Bcan	60	16	5.547	2.75407e+06	1.62232e+07
Q9CS84	Neurexin-1	Nrxn1	43	20	5.481	2.258e+06	1.03433e+07
P35282	Ras-related protein Rab-21	Rab21	13	5	5.47	78955.6	431893
P13595	Neural cell adhesion molecule 1	Ncam1	211	26	5.452	2.15408e+07	1.11459e+08
Q8BLK3	Limbic system-associated membrane protein	Lsamp	50	11	5.355	2.26792e+06	1.44471e+07
Q921F2	TAR DNA-binding protein 43	Tardbp	17	5	5.239	109287	572526
Q6NXK7	Inactive dipeptidyl peptidase 10	Dpp10	44	13	5.233	1.42663e+06	7.37216e+06
O35405	5'-3' exonuclease PLD3	Pld3	43	8	5.143	2.88301e+06	1.50098e+07
Q9QYS2	Metabotropic glutamate receptor 3	Grm3	98	20	5.124	3.96603e+06	2.24254e+07
Q6NZL0	Protein SOGA3	Soga3	7	5	5.087	45262.4	230262
Q7TNR6	Immunoglobulin superfamily member 21	Igsf21	24	9	5.079	360724	2.01914e+06
Q99PH1	Leucine-rich repeat-containing protein 4	Lrrc4	12	3	5.067	79978	405264
O88322	Nidogen-2	Nid2	41	14	5.037	774150	4.06301e+06
P02468	Laminin subunit gamma-1	Lamc1	37	22	5.022	487753	3.02688e+06
Q01097	Glutamate receptor ionotropic, NMDA 2B	Grin2b	59	20	4.987	1.15224e+06	6.78868e+06
Q61137	Astrotactin-1	Astn1	53	20	4.986	1.35499e+06	7.43844e+06
Q80UG2	Plexin-A4	Plxna4	63	19	4.933	1.4362e+06	7.8779e+06
Q80YX1	Tenascin	Tnc	24	14	4.91	315034	1.31698e+06
Q3UHK6	Teneurin-4	Tenm4	21	12	4.902	202904	1.03681e+06
Q80V42	Carboxypeptidase M	Cpm	13	5	4.884	150285	690333
Q4KUS2	Protein unc-13 homolog A	Unc13a	6	3	4.875	39959.8	194806
Q3UVX5	Metabotropic glutamate receptor 5	Grm5	28	12	4.872	720745	3.34194e+06
Q8BTG7	Protein NDRG4	Ndrg4	13	4	4.848	820380	1.91979e+06
Q9CPQ8	ATP synthase subunit g, mitochondrial	Atp5mg	8	3	4.845	173224	839270
Q80XU8	Leucine-rich repeat and fibronectin type-III domain-containing protein 4	Lrfn4	5	3	4.836	67841	328057
P21995	Embigin	Emb	4	3	4.818	81426.6	392297
Q8BJI1	Sodium-dependent neutral amino acid transporter SLC6A17	Slc6a17	11	7	4.816	394066	2.18911e+06
Q920P3	BMP/retinoic acid-inducible neural-specific protein 1	Brinp1	13	5	4.799	122456	666639
P70699	Lysosomal alpha-glucosidase	Gaa	3	3	4.786	105080	502947
P70206	Plexin-A1	Plxna1	69	21	4.765	1.05792e+06	4.55905e+06
Q9Z0L0	Trophoblast glycoprotein	Tpbg	7	4	4.757	120636	573815
Q9DBH5	Vesicular integral-membrane protein VIP36	Lman2	5	3	4.645	66432.4	308609
Q60780	Growth arrest-specific protein 7	Gas7	6	4	4.619	54170.8	250199
P15209	BDNF/NT-3 growth factors receptor	Ntrk2	49	9	4.596	1.18806e+06	7.16694e+06
Q3UUI3	Acyl-coenzyme A thioesterase THEM4	Them4	9	5	4.57	162180	749528
Q80ZF8	Adhesion G protein-coupled receptor B3	Adgrb3	21	9	4.567	432466	2.09618e+06
Q8BZ81	Leucine-rich repeat transmembrane neuronal protein 3	Lrrtm3	17	8	4.488	291072	1.21644e+06
Q6P9K9	Neurexin-3	Nrxn3	29	11	4.472	397267	1.76607e+06
O54901	OX-2 membrane glycoprotein	Cd200	11	4	4.457	503723	2.77198e+06
O55026	Ectonucleoside triphosphate diphosphohydrolase 2	Entpd2	20	5	4.453	282307	1.38943e+06
Q8R366	Immunoglobulin superfamily member 8	Igsf8	50	12	4.45	3.89036e+06	1.70219e+07
O54990	Prominin-1	Prom1	6	3	4.399	281296	928761
O54774	AP-3 complex subunit delta-1	Ap3d1	21	6	4.368	218734	812836
Q6X893	Choline transporter-like protein 1	Slc44a1	9	3	4.367	122807	951456
Q9R069	Basal cell adhesion molecule	Bcam	17	5	4.362	341046	1.45392e+06
P57780	Alpha-actinin-4	Actn4	117	16	4.332	764804	4.79425e+06
P56480	ATP synthase subunit beta, mitochondrial	Atp5f1b	145	20	4.323	1.58527e+07	6.34311e+07
P68040	Receptor of activated protein C kinase 1	Rack1	29	10	4.195	1.48685e+06	3.53192e+06
P0C7M9	C-type lectin domain family 2 member L	Clec2l	8	3	4.177	83986.6	350806
Q9DB72	BTB/POZ domain-containing protein 17	Btbd17	29	9	4.157	688572	3.06056e+06
O08917	Flotillin-1	Flot1	13	8	4.111	201861	1.06152e+06
O88307	Sortilin-related receptor	Sorl1	20	14	4.065	262190	1.17067e+06
P24668	Cation-dependent mannose-6-phosphate receptor	M6pr	10	3	4.045	120390	486990
Q8R081	Heterogeneous nuclear ribonucleoprotein L	Hnrnpl	22	8	4.033	985975	2.33129e+06
P70207	Plexin-A2	Plxna2	47	12	4.033	415518	2.6805e+06
Q80T41	Gamma-aminobutyric acid type B receptor subunit 2	Gabbr2	20	8	4.023	163090	585286
Q8VHW2	Voltage-dependent calcium channel gamma-8 subunit	Cacng8	26	6	4.022	743596	4.64933e+06
P10852	4F2 cell-surface antigen heavy chain	Slc3a2	81	16	4.006	5.96929e+06	2.35207e+07
Q14BI2	Metabotropic glutamate receptor 2	Grm2	51	11	3.978	1.50977e+06	6.97074e+06
Q9JME5	AP-3 complex subunit beta-2	Ap3b2	22	13	3.954	227422	878743
B2RXS4	Plexin-B2	Plxnb2	16	9	3.895	192427	759974
P26040	Ezrin	Ezr	11	3	3.792	795662	1.75301e+06
O08532	Voltage-dependent calcium channel subunit alpha-2/delta-1	Cacna2d1	31	11	3.783	178142	637526
E9Q557	Desmoplakin	Dsp	18	10	3.775	138845	524123
P07724	Albumin	Alb	56	14	3.652	5.80842e+06	1.67367e+07
Q9R0Q7	Prostaglandin E synthase 3	Ptges3	6	3	3.645	24539.2	89451.3
Q9QYB5	Gamma-adducin	Add3	14	7	3.644	451296	1.42595e+06
P50429	Arylsulfatase B	Arsb	8	3	3.64	242853	883940
Q80Z24	Neuronal growth regulator 1	Negr1	40	9	3.625	1.13528e+06	4.00593e+06
P97823	Acyl-protein thioesterase 1	Lypla1	12	3	3.624	51333.3	186031
Q8K400	Syntaxin-binding protein 5	Stxbp5	13	5	3.61	109332	394715
Q8C522	Endonuclease domain-containing 1 protein	Endod1	11	5	3.584	129900	556701
Q9D4H8	Cullin-2	Cul2	5	4	3.553	119592	424860
Q9CY64	Biliverdin reductase A	Blvra	15	6	3.552	212151	590985
Q80TZ3	Putative tyrosine-protein phosphatase auxilin	Dnajc6	29	10	3.522	314917	1.00968e+06
Q6V4S5	Protein sidekick-2	Sdk2	22	13	3.513	174103	715281
P14231	Sodium/potassium-transporting ATPase subunit beta-2	Atp1b2	71	12	3.487	1.12061e+07	3.44353e+07
Q9QUP5	Hyaluronan and proteoglycan link protein 1	Hapln1	32	9	3.435	1.9477e+06	8.00274e+06
Q9CZT8	Ras-related protein Rab-3B	Rab3b	27	3	3.38	2.70087e+06	7.47491e+06
P31648	Sodium- and chloride-dependent GABA transporter 1	Slc6a1	24	6	3.374	2.6242e+06	5.82383e+06
Q9CYT6	Adenylyl cyclase-associated protein 2	Cap2	43	13	3.37	1.99415e+06	4.51312e+06
O70340	Neuronal pentraxin-2	Nptx2	15	7	3.368	561912	1.78707e+06
P55066	Neurocan core protein	Ncan	53	15	3.363	2.59698e+06	9.07337e+06
O54781	SRSF protein kinase 2	Srpk2	9	5	3.351	78448.2	262888
Q9CQQ7	ATP synthase F(0) complex subunit B1, mitochondrial	Atp5pb	35	8	3.35	3.73947e+06	8.19994e+06
Q9JKR6	Hypoxia up-regulated protein 1	Hyou1	9	8	3.337	41173.1	137395
P56564	Excitatory amino acid transporter 1	Slc1a3	71	9	3.328	3.65172e+06	9.02168e+06
O54983	Ketimine reductase mu-crystallin	Crym	40	10	3.308	1.70996e+06	4.21806e+06
P20444	Protein kinase C alpha type	Prkca	38	5	3.297	52707.7	173793
P17047	Lysosome-associated membrane glycoprotein 2	Lamp2	4	3	3.283	98558.5	323544
Q3UUG6	TBC1 domain family member 24	Tbc1d24	6	3	3.282	130491	525928
Q99JP7	Glutathione hydrolase 7	Ggt7	24	10	3.28	730552	2.30053e+06
P01831	Thy-1 membrane glycoprotein	Thy1	57	5	3.278	2.21012e+07	6.23794e+07
Q62108	Disks large homolog 4	Dlg4	120	25	3.25	7.31465e+06	2.43718e+07
Q791T5	Mitochondrial carrier homolog 1	Mtch1	19	6	3.214	141148	453632
Q9WU79	Proline dehydrogenase 1, mitochondrial	Prodh	3	3	3.195	104184	332861
Q02257	Junction plakoglobin	Jup	13	8	3.189	234586	744387
Q80TR1	Adhesion G protein-coupled receptor L1	Adgrl1	18	8	3.18	597737	1.43549e+06
P18572	Basigin	Bsg	14	5	3.153	503149	1.58639e+06
P16388	Potassium voltage-gated channel subfamily A member 1	Kcna1	13	3	3.143	557767	1.75314e+06
P09528	Ferritin heavy chain	Fth1	12	5	3.14	1.02316e+06	3.6075e+06
Q9R0M0	Cadherin EGF LAG seven-pass G-type receptor 2	Celsr2	23	11	3.136	47075	147628
Q8VEK0	Cell cycle control protein 50A	Tmem30a	8	3	3.109	731829	1.84679e+06
P68181	cAMP-dependent protein kinase catalytic subunit beta	Prkacb	27	3	3.096	441386	1.37258e+06
Q69Z26	Contactin-4	Cntn4	5	3	3.089	63098.3	194890
Q91WS0	CDGSH iron-sulfur domain-containing protein 1	Cisd1	20	3	3.087	2.04902e+06	5.49349e+06
Q91XL9	Oxysterol-binding protein-related protein 1	Osbpl1a	12	5	3.058	54008.1	165140
Q9D8B4	NADH dehydrogenase	Ndufa11	7	3	3.046	134500	409711
Q99M71	Mammalian ependymin-related protein 1	Epdr1	23	7	2.949	1.85765e+06	6.53006e+06
Q61885	Myelin-oligodendrocyte glycoprotein	Mog	64	9	2.941	8.55668e+06	2.50323e+07
B1AWN6	Sodium channel protein type 2 subunit alpha	Scn2a	16	7	2.937	598821	1.60838e+06
O88343	Electrogenic sodium bicarbonate cotransporter 1	Slc4a4	51	10	2.93	2.72044e+06	7.69349e+06
Q91V12	Cytosolic acyl coenzyme A thioester hydrolase	Acot7	46	7	2.921	4.2376e+06	1.09999e+07
Q61543	Golgi apparatus protein 1	Glg1	10	5	2.904	130552	315388
Q8JZR6	Electroneutral sodium bicarbonate exchanger 1	Slc4a8	33	3	2.898	118600	343661
Q8BVE3	V-type proton ATPase subunit H	Atp6v1h	43	16	2.86	3.39053e+06	9.71982e+06
Q9DCS9	NADH dehydrogenase	Ndufb10	28	7	2.849	1.31987e+06	3.33012e+06
Q9CPU4	Microsomal glutathione S-transferase 3	Mgst3	11	3	2.846	759464	2.26231e+06
Q9Z2U1	Proteasome subunit alpha type-5	Psma5	14	5	2.84	546880	1.08914e+06
O35678	Monoglyceride lipase	Mgll	31	14	2.835	1.30372e+06	2.95759e+06
Q8K3J1	NADH dehydrogenase	Ndufs8	8	3	2.825	92689.5	261831
Q6Q477	Plasma membrane calcium-transporting ATPase 4	Atp2b4	132	11	2.819	2.79145e+06	7.59971e+06
Q9CPQ1	Cytochrome c oxidase subunit 6C	Cox6c	12	3	2.818	1.39445e+06	3.81964e+06
E9PZ19	Protein turtle homolog B	Igsf9b	26	13	2.81	214511	661407
Q80WM4	Hyaluronan and proteoglycan link protein 4	Hapln4	7	5	2.81	113418	318739
Q9R1P3	Proteasome subunit beta type-2	Psmb2	12	4	2.81	392911	1.09545e+06
Q9QXS1	Plectin	Plec	63	29	2.785	562201	2.42931e+06
Q5DTY9	BTB/POZ domain-containing protein KCTD16	Kctd16	24	7	2.779	3.1428e+06	7.90195e+06
Q9CQW1	Synaptobrevin homolog YKT6	Ykt6	9	4	2.762	729100	1.60007e+06
P11983	T-complex protein 1 subunit alpha	Tcp1	37	12	2.759	486787	2.13214e+06
Q6P5F7	Protein tweety homolog 3	Ttyh3	9	4	2.75	106489	251774
Q9CQJ8	NADH dehydrogenase	Ndufb9	38	7	2.736	2.59157e+06	5.66686e+06
Q80U28	MAP kinase-activating death domain protein	Madd	8	5	2.736	198269	627398
Q9QZ88	Vacuolar protein sorting-associated protein 29	Vps29	11	3	2.734	629569	1.27836e+06
Q6PB66	Leucine-rich PPR motif-containing protein, mitochondrial	Lrpprc	20	11	2.728	165600	472947
Q9D819	Inorganic pyrophosphatase	Ppa1	6	4	2.721	113236	308100
Q9D1Q6	Endoplasmic reticulum resident protein 44	Erp44	5	3	2.713	86955.5	235949
Q8BY89	Choline transporter-like protein 2	Slc44a2	7	4	2.7	326623	1.00128e+06
P68404	Protein kinase C beta type	Prkcb	96	18	2.675	8.55218e+06	1.73402e+07
Q8R2R9	AP-3 complex subunit mu-2	Ap3m2	5	4	2.672	312997	869245
Q91ZJ5	UTP--glucose-1-phosphate uridylyltransferase	Ugp2	19	8	2.664	336042	841066
Q9WUM4	Coronin-1C	Coro1c	21	5	2.658	751765	1.74056e+06
Q9CR62	Mitochondrial 2-oxoglutarate/malate carrier protein	Slc25a11	50	13	2.641	3.97388e+06	9.37343e+06
P31650	Sodium- and chloride-dependent GABA transporter 3	Slc6a11	20	5	2.629	2.75481e+06	6.58747e+06
P50247	Adenosylhomocysteinase	Ahcy	9	6	2.624	543936	1.36338e+06
Q7TPR4	Alpha-actinin-1	Actn1	194	25	2.588	1.46973e+07	3.9081e+07
Q5DTL9	Sodium-driven chloride bicarbonate exchanger	Slc4a10	84	14	2.587	3.70823e+06	9.89419e+06
Q8BLE7	Vesicular glutamate transporter 2	Slc17a6	29	5	2.583	123185	318190
Q8CA95	cAMP and cAMP-inhibited cGMP 3',5'-cyclic phosphodiesterase 10A	Pde10a	18	9	2.576	344320	776102
P10605	Cathepsin B	Ctsb	30	7	2.571	570876	2.54338e+06
Q8BHN3	Neutral alpha-glucosidase AB	Ganab	24	12	2.557	577331	1.43911e+06
Q8VEM8	Phosphate carrier protein, mitochondrial	Slc25a3	101	16	2.55	1.09553e+07	2.77283e+07
Q80XI4	Phosphatidylinositol 5-phosphate 4-kinase type-2 beta	Pip4k2b	19	4	2.545	1.09101e+06	2.35351e+06
Q91V14	Solute carrier family 12 member 5	Slc12a5	120	25	2.544	1.71069e+07	4.33041e+07
P51881	ADP/ATP translocase 2	Slc25a5	165	8	2.543	1.97505e+07	5.03232e+07
P48722	Heat shock 70 kDa protein 4L	Hspa4l	54	14	2.516	1.05145e+06	2.23782e+06
P97772	Metabotropic glutamate receptor 1	Grm1	17	6	2.504	326938	768471
P51830	Adenylate cyclase type 9	Adcy9	8	4	2.503	348995	989134
Q8CAQ8	MICOS complex subunit Mic60	Immt	140	30	2.495	1.24644e+07	3.486e+07
P62331	ADP-ribosylation factor 6	Arf6	17	4	2.493	629608	1.44533e+06
Q91XM9	Disks large homolog 2	Dlg2	43	13	2.491	1.07723e+06	2.37529e+06
Q6ZPE2	Myotubularin-related protein 5	Sbf1	14	8	2.45	68005.5	166632
Q9JM76	Actin-related protein 2/3 complex subunit 3	Arpc3	32	6	2.446	2.43933e+06	5.14639e+06
Q9D023	Mitochondrial pyruvate carrier 2	Mpc2	23	4	2.432	1.42442e+06	2.71518e+06
Q8BW75	Amine oxidase	Maob	9	6	2.43	90255.4	219331
P58281	Dynamin-like 120 kDa protein, mitochondrial	Opa1	100	30	2.426	7.26344e+06	1.80354e+07
Q6GQT9	Nodal modulator 1	Nomo1	11	4	2.426	191865	468574
P47738	Aldehyde dehydrogenase, mitochondrial	Aldh2	40	11	2.424	1.36722e+06	3.80565e+06
P62821	Ras-related protein Rab-1A	Rab1A	22	3	2.406	782621	1.38356e+06
Q3UH93	Plexin-D1	Plxnd1	27	15	2.398	871620	641227
Q9JMA1	Ubiquitin carboxyl-terminal hydrolase 14	Usp14	8	4	2.384	269818	577327
Q8QZS1	3-hydroxyisobutyryl-CoA hydrolase, mitochondrial	Hibch	20	7	2.382	321868	1.01288e+06
P10493	Nidogen-1	Nid1	64	21	2.373	5.01314e+06	1.0917e+07
Q922B2	Aspartate--tRNA ligase, cytoplasmic	Dars1	16	8	2.369	315197	789131
Q9Z1Q2	Phosphatidylserine lipase ABHD16A	Abhd16a	12	7	2.359	88994.4	209924
P63330	Serine/threonine-protein phosphatase 2A catalytic subunit alpha isoform	Ppp2ca	33	10	2.355	3.50948e+06	5.75346e+06
Q9Z2H5	Band 4.1-like protein 1	Epb41l1	37	12	2.335	2.95935e+06	5.33139e+06
Q2WF71	Leucine-rich repeat and fibronectin type III domain-containing protein 1	Lrfn1	3	3	2.317	97120.2	225022
Q9DCN2	NADH-cytochrome b5 reductase 3	Cyb5r3	37	8	2.305	2.51014e+06	4.92443e+06
Q64514	Tripeptidyl-peptidase 2	Tpp2	24	12	2.3	472155	1.03345e+06
Q9DBJ1	Phosphoglycerate mutase 1	Pgam1	123	14	2.29	2.62196e+07	4.06836e+07
P61358	60S ribosomal protein L27	Rpl27	16	4	2.288	1.63412e+06	3.69671e+06
Q60737	Casein kinase II subunit alpha	Csnk2a1	12	5	2.284	363179	874382
Q64133	Amine oxidase	Maoa	31	9	2.266	990308	2.13309e+06
Q91VR5	ATP-dependent RNA helicase DDX1	Ddx1	22	9	2.261	119199	269551
Q8BPN8	DmX-like protein 2	Dmxl2	57	29	2.259	1.4299e+06	3.09206e+06
Q91YQ5	Dolichyl-diphosphooligosaccharide--protein glycosyltransferase subunit 1	Rpn1	22	8	2.255	460433	1.00358e+06
Q8BH44	Coronin-2B	Coro2b	10	5	2.251	160946	362307
Q8K4X7	1-acyl-sn-glycerol-3-phosphate acyltransferase delta	Agpat4	5	3	2.247	127812	335273
E9Q7X7	Neurexin-2	Nrxn2	14	4	2.247	106182	238548
O88741	Ganglioside-induced differentiation-associated protein 1	Gdap1	15	5	2.242	1.04633e+06	2.252e+06
Q8K0S0	Phytanoyl-CoA hydroxylase-interacting protein	Phyhip	29	5	2.241	338731	759035
Q925N0	Sideroflexin-5	Sfxn5	22	8	2.24	1.31297e+06	3.28815e+06
Q9D7N9	Adipocyte plasma membrane-associated protein	Apmap	9	4	2.237	88943.9	198957
Q61941	NAD(P) transhydrogenase, mitochondrial	Nnt	10	5	2.233	207813	463973
P70414	Sodium/calcium exchanger 1	Slc8a1	10	3	2.23	561637	1.25262e+06
P35762	CD81 antigen	Cd81	21	3	2.228	1.9031e+06	4.30454e+06
Q99KP6	Pre-mRNA-processing factor 19	Prpf19	6	3	2.22	105656	234547
Q9Z140	Copine-6	Cpne6	17	7	2.22	1.67794e+06	3.59845e+06
Q9CY27	Very-long-chain enoyl-CoA reductase	Tecr	10	6	2.217	1.28328e+06	2.56497e+06
P09103	Protein disulfide-isomerase	P4hb	6	5	2.215	251373	703251
Q920N2	Biotin--protein ligase	Hlcs	10	4	2.214	553619	1.09938e+06
P62827	GTP-binding nuclear protein Ran	Ran	30	7	2.197	4.3072e+06	1.03787e+07
P47911	60S ribosomal protein L6	Rpl6	18	7	2.195	2.11664e+06	4.24607e+06
P16546	Spectrin alpha chain, non-erythrocytic 1	Sptan1	572	130	2.195	1.1841e+08	2.09712e+08
O88643	Serine/threonine-protein kinase PAK 1	Pak1	13	3	2.193	375368	846847
Q99JR1	Sideroflexin-1	Sfxn1	19	5	2.19	839633	2.13216e+06
Q8K596	Sodium/calcium exchanger 2	Slc8a2	55	13	2.187	3.42984e+06	7.72476e+06
Q9R1P4	Proteasome subunit alpha type-1	Psma1	21	4	2.175	777976	1.47399e+06
Q91WC3	Long-chain-fatty-acid--CoA ligase 6	Acsl6	57	18	2.174	3.13313e+06	6.41705e+06
Q05816	Fatty acid-binding protein 5	Fabp5	13	4	2.169	2.06466e+06	3.47987e+06
Q91VN4	MICOS complex subunit Mic25	Chchd6	7	5	2.163	252315	545860
P60202	Myelin proteolipid protein	Plp1	117	7	2.149	1.44785e+08	3.19972e+08
Q9D3A9	Protein tweety homolog 1	Ttyh1	20	5	2.148	1.81443e+06	3.8504e+06
Q8BHE3	Caytaxin	Atcay	4	3	2.146	166118	356419
P62806	Histone H4	H4c1	24	5	2.142	2.35991e+06	6.68026e+06
P28740	Kinesin-like protein KIF2A	Kif2a	20	8	2.137	325097	694847
Q62261	Spectrin beta chain, non-erythrocytic 1	Sptbn1	421	100	2.135	5.31781e+07	1.03188e+08
P62242	40S ribosomal protein S8	Rps8	23	6	2.133	1.55981e+06	3.67767e+06
Q6ZQ18	Protein EFR3 homolog B	Efr3b	7	4	2.131	102927	219377
P62482	Voltage-gated potassium channel subunit beta-2	Kcnab2	22	6	2.127	931678	1.84997e+06
Q8C419	Probable G-protein coupled receptor 158	Gpr158	48	20	2.125	2.44449e+06	4.24919e+06
Q8BKC5	Importin-5	Ipo5	16	11	2.116	536258	752635
P48962	ADP/ATP translocase 1	Slc25a4	213	10	2.116	1.37765e+08	3.01868e+08
P35803	Neuronal membrane glycoprotein M6-b	Gpm6b	33	8	2.115	5.52243e+06	1.51804e+07
Q62277	Synaptophysin	Syp	48	5	2.108	1.46369e+07	2.63789e+07
P10630	Eukaryotic initiation factor 4A-II	Eif4a2	29	5	2.106	1.12464e+06	2.3113e+06
Q9R0Q6	Actin-related protein 2/3 complex subunit 1A	Arpc1a	17	8	2.102	3.19906e+06	6.80141e+06
Q61768	Kinesin-1 heavy chain	Kif5b	27	3	2.101	52815.7	110954
P02463	Collagen alpha-1(IV) chain	Col4a1	5	3	2.097	234358	491558
P46638	Ras-related protein Rab-11B	Rab11b	27	6	2.094	1.50215e+06	3.01246e+06
O88485	Cytoplasmic dynein 1 intermediate chain 1	Dync1i1	6	4	2.093	207066	433339
P53026	60S ribosomal protein L10a	Rpl10a	7	3	2.092	672974	1.48364e+06
Q9Z0V2	Potassium voltage-gated channel subfamily D member 2	Kcnd2	9	4	2.09	201308	301316
F8VPU2	FERM, ARHGEF and pleckstrin domain-containing protein 1	Farp1	8	5	2.086	100204	208990
Q9R0K7	Plasma membrane calcium-transporting ATPase 2	Atp2b2	223	25	2.077	2.61319e+07	5.08637e+07
Q9Z1G4	V-type proton ATPase 116 kDa subunit a 1	Atp6v0a1	131	23	2.075	1.74382e+07	3.79873e+07
Q80TB8	Synaptic vesicle membrane protein VAT-1 homolog-like	Vat1l	10	5	2.074	322603	668921
Q922S4	cGMP-dependent 3',5'-cyclic phosphodiesterase	Pde2a	59	19	2.072	1.58583e+06	3.82983e+06
P84091	AP-2 complex subunit mu	Ap2m1	87	17	2.071	1.20474e+07	2.57192e+07
Q6PIC6	Sodium/potassium-transporting ATPase subunit alpha-3	Atp1a3	689	31	2.071	2.62043e+08	5.81094e+08
Q9JIS5	Synaptic vesicle glycoprotein 2A	Sv2a	41	7	2.07	4.23672e+06	9.07112e+06
Q9JHU4	Cytoplasmic dynein 1 heavy chain 1	Dync1h1	307	110	2.07	2.25966e+07	4.46196e+07
Q920I9	WD repeat-containing protein 7	Wdr7	49	18	2.069	1.55955e+06	3.36672e+06
Q9CQI6	Coactosin-like protein	Cotl1	11	5	2.069	521998	1.11464e+06
Q8BH59	Electrogenic aspartate/glutamate antiporter SLC25A12, mitochondrial	Slc25a12	142	31	2.069	1.19024e+07	2.72283e+07
P53994	Ras-related protein Rab-2A	Rab2a	42	9	2.067	4.64749e+06	1.01328e+07
Q06185	ATP synthase subunit e, mitochondrial	Atp5me	11	4	2.064	245466	506546
Q8BG39	Synaptic vesicle glycoprotein 2B	Sv2b	46	10	2.062	2.72862e+06	6.60849e+06
Q9R0X4	Acyl-coenzyme A thioesterase 9, mitochondrial	Acot9	14	6	2.053	1.09092e+06	2.01226e+06
Q93092	Transaldolase	Taldo1	14	4	2.038	280662	710929
Q8CBE3	WD repeat-containing protein 37	Wdr37	19	7	2.038	686333	1.44123e+06
F6SEU4	Ras/Rap GTPase-activating protein SynGAP	Syngap1	64	26	2.038	6.43132e+06	1.27094e+07
P63005	Platelet-activating factor acetylhydrolase IB subunit beta	Pafah1b1	19	6	2.037	2.7612e+06	4.61264e+06
Q8BX10	Serine/threonine-protein phosphatase PGAM5, mitochondrial	Pgam5	7	5	2.02	197581	399112
Q9DB05	Alpha-soluble NSF attachment protein	Napa	39	9	2.02	3.23657e+06	3.70324e+06
P62754	40S ribosomal protein S6	Rps6	15	4	2.018	797160	1.62614e+06
Q9DBE8	Alpha-1,3/1,6-mannosyltransferase ALG2	Alg2	9	3	2.015	245052	504185
Q9QYB8	Beta-adducin	Add2	46	13	2.007	4.10228e+06	7.79361e+06
Q640R3	Hepatocyte cell adhesion molecule	Hepacam	13	5	2.002	728228	1.43652e+06
P14824	Annexin A6	Anxa6	73	24	2	6.10139e+06	1.22247e+07
Q8C0E2	Vacuolar protein sorting-associated protein 26B	Vps26b	13	4	1.995	511780	945173
Q8K212	Phosphofurin acidic cluster sorting protein 1	Pacs1	27	11	1.993	852867	1.84761e+06
Q99PU5	Long-chain-fatty-acid--CoA ligase ACSBG1	Acsbg1	8	4	1.992	762312	1.40925e+06
Q8R001	Microtubule-associated protein RP/EB family member 2	Mapre2	11	4	1.991	595119	1.1433e+06
P51150	Ras-related protein Rab-7a	Rab7a	39	10	1.99	2.32311e+06	4.62986e+06
P97351	40S ribosomal protein S3a	Rps3a	34	7	1.984	1.34586e+06	3.67794e+06
Q62425	Cytochrome c oxidase subunit NDUFA4	Ndufa4	22	4	1.98	6.39054e+06	1.33209e+07
Q68FD5	Clathrin heavy chain 1	Cltc	537	84	1.976	8.83925e+07	1.82636e+08
Q9JI46	Diphosphoinositol polyphosphate phosphohydrolase 1	Nudt3	7	3	1.973	665242	803894
A2RT62	F-box/LRR-repeat protein 16	Fbxl16	8	3	1.971	165821	326755
Q8K021	Secretory carrier-associated membrane protein 1	Scamp1	10	5	1.969	1.27113e+06	2.67796e+06
P17427	AP-2 complex subunit alpha-2	Ap2a2	156	25	1.968	8.04294e+06	1.73529e+07
Q64516	Glycerol kinase	Gk	11	7	1.966	768213	1.51287e+06
P58252	Elongation factor 2	Eef2	89	24	1.963	9.77234e+06	1.52712e+07
P80317	T-complex protein 1 subunit zeta	Cct6a	24	7	1.963	1.35466e+06	2.79322e+06
Q61553	Fascin	Fscn1	73	14	1.96	1.27087e+07	2.416e+07
Q05793	Basement membrane-specific heparan sulfate proteoglycan core protein	Hspg2	89	36	1.956	3.1421e+06	6.84959e+06
P62631	Elongation factor 1-alpha 2	Eef1a2	92	5	1.955	3.88433e+06	9.09317e+06
Q8K2C9	Very-long-chain (3R)-3-hydroxyacyl-CoA dehydratase 3	Hacd3	9	4	1.954	523035	1.09674e+06
Q61598	Rab GDP dissociation inhibitor beta	Gdi2	77	15	1.954	3.93912e+06	7.79912e+06
P61255	60S ribosomal protein L26	Rpl26	13	4	1.953	939899	1.82143e+06
P61161	Actin-related protein 2	Actr2	30	9	1.949	796238	1.95967e+06
Q8CGC7	Bifunctional glutamate/proline--tRNA ligase	Eprs1	11	6	1.949	78612.6	153185
P80315	T-complex protein 1 subunit delta	Cct4	46	15	1.947	2.55319e+06	5.13605e+06
P37040	NADPH--cytochrome P450 reductase	Por	13	7	1.946	39068.7	76023.2
P97300	Neuroplastin	Nptn	74	10	1.945	4.30416e+07	5.56068e+07
O55126	Protein NipSnap homolog 2	Nipsnap2	6	3	1.941	970373	2.28601e+06
Q99104	Unconventional myosin-Va	Myo5a	85	32	1.94	4.05917e+06	7.98083e+06
Q5FWK3	Rho GTPase-activating protein 1	Arhgap1	29	8	1.933	679087	1.34271e+06
Q9R0N7	Synaptotagmin-7	Syt7	11	6	1.932	79566.5	153753
P97427	Dihydropyrimidinase-related protein 1	Crmp1	162	17	1.932	1.54149e+07	2.81218e+07
P07901	Heat shock protein HSP 90-alpha	Hsp90aa1	174	19	1.931	1.3333e+07	2.65775e+07
Q91V92	ATP-citrate synthase	Acly	38	18	1.929	1.68446e+06	3.62618e+06
Q8R0A7	Uncharacterized protein KIAA0513	Kiaa0513	7	4	1.929	193759	373756
G5E829	Plasma membrane calcium-transporting ATPase 1	Atp2b1	206	16	1.928	1.83845e+07	3.43592e+07
P10126	Elongation factor 1-alpha 1	Eef1a1	97	8	1.927	2.9228e+07	5.6809e+07
Q8BIJ6	Isoleucine--tRNA ligase, mitochondrial	Iars2	16	8	1.922	337491	1.11002e+06
Q91V41	Ras-related protein Rab-14	Rab14	54	11	1.921	4.66562e+06	9.97711e+06
Q80ZJ1	Ras-related protein Rap-2a	Rap2a	34	3	1.918	786551	1.29038e+06
Q8CI94	Glycogen phosphorylase, brain form	Pygb	80	16	1.916	5.82412e+06	1.17007e+07
Q8BMF3	NADP-dependent malic enzyme, mitochondrial	Me3	10	4	1.915	279315	534988
Q8VDN2	Sodium/potassium-transporting ATPase subunit alpha-1	Atp1a1	507	27	1.914	4.58196e+07	9.44016e+07
Q05909	Receptor-type tyrosine-protein phosphatase gamma	Ptprg	7	3	1.91	94593.6	180633
P61205	ADP-ribosylation factor 3	Arf3	92	6	1.909	2.13058e+07	3.59078e+07
Q6PIE5	Sodium/potassium-transporting ATPase subunit alpha-2	Atp1a2	447	28	1.907	2.62683e+07	4.89886e+07
P61027	Ras-related protein Rab-10	Rab10	17	5	1.903	3.22955e+06	6.94905e+06
Q9CZM2	60S ribosomal protein L15	Rpl15	12	4	1.902	531878	1.49032e+06
Q8BGT8	Phytanoyl-CoA hydroxylase-interacting protein-like	Phyhipl	29	6	1.9	1.93094e+06	3.70562e+06
P62743	AP-2 complex subunit sigma	Ap2s1	16	3	1.9	2.58631e+06	4.92031e+06
P86048	60S ribosomal protein L10-like	Rpl10l	11	4	1.9	213296	405172
Q8BWF0	Succinate-semialdehyde dehydrogenase, mitochondrial	Aldh5a1	41	13	1.895	2.6183e+06	5.20426e+06
P12970	60S ribosomal protein L7a	Rpl7a	23	6	1.893	1.49562e+06	3.32775e+06
Q9QYR6	Microtubule-associated protein 1A	Map1a	80	20	1.891	8.01742e+06	1.47235e+07
P40124	Adenylyl cyclase-associated protein 1	Cap1	64	13	1.889	3.89254e+06	8.70435e+06
P62281	40S ribosomal protein S11	Rps11	30	9	1.888	2.82024e+06	5.30462e+06
Q91YT0	NADH dehydrogenase	Ndufv1	88	21	1.888	1.32001e+07	2.33797e+07
Q921H8	3-ketoacyl-CoA thiolase A, peroxisomal	Acaa1a	10	4	1.887	261467	545874
P63011	Ras-related protein Rab-3A	Rab3a	87	6	1.885	2.54221e+07	4.7849e+07
P51410	60S ribosomal protein L9	Rpl9	13	5	1.885	1.02729e+06	1.58683e+06
Q60597	2-oxoglutarate dehydrogenase complex component E1	Ogdh	91	29	1.885	8.9423e+06	1.73359e+07
Q0KL02	Triple functional domain protein	Trio	13	5	1.884	412264	783188
P17710	Hexokinase-1	Hk1	332	43	1.883	5.94733e+07	1.17803e+08
Q02248	Catenin beta-1	Ctnnb1	31	10	1.883	2.16694e+06	4.31488e+06
O08756	3-hydroxyacyl-CoA dehydrogenase type-2	Hsd17b10	7	6	1.882	421595	793470
Q91WQ3	Tyrosine--tRNA ligase, cytoplasmic	Yars1	4	4	1.882	263681	469392
Q5M8N0	CB1 cannabinoid receptor-interacting protein 1	Cnrip1	31	6	1.876	5.2111e+06	1.0466e+07
P17426	AP-2 complex subunit alpha-1	Ap2a1	229	32	1.875	2.22075e+07	4.24658e+07
Q3UHD1	Adhesion G protein-coupled receptor B1	Adgrb1	9	5	1.874	3.21287e+06	2.88431e+06
P47857	ATP-dependent 6-phosphofructokinase, muscle type	Pfkm	131	21	1.872	1.2467e+07	2.38216e+07
Q8CHC4	Synaptojanin-1	Synj1	93	33	1.87	5.52594e+06	1.02452e+07
Q9WUA3	ATP-dependent 6-phosphofructokinase, platelet type	Pfkp	84	18	1.868	4.50533e+06	9.03142e+06
Q99PT1	Rho GDP-dissociation inhibitor 1	Arhgdia	58	8	1.865	6.35652e+06	1.18201e+07
Q9DB41	Mitochondrial glutamate carrier 2	Slc25a18	42	4	1.862	693753	1.58268e+06
Q9ESW4	Acylglycerol kinase, mitochondrial	Agk	39	12	1.861	2.84075e+06	5.43482e+06
Q9CQS4	Mitochondrial outer membrane protein SLC25A46	Slc25a46	7	3	1.855	296131	565851
C0HKE3	Histone H2A type 1-D	H2ac7	17	3	1.854	1.56027e+06	2.88477e+06
P28271	Cytoplasmic aconitate hydratase	Aco1	5	3	1.853	97813	181239
Q8C8R3	Ankyrin-2	Ank2	126	33	1.852	8.11889e+06	1.51257e+07
Q9CVB6	Actin-related protein 2/3 complex subunit 2	Arpc2	41	9	1.849	2.08818e+06	4.25278e+06
Q2NL51	Glycogen synthase kinase-3 alpha	Gsk3a	21	6	1.849	288018	1.29075e+07
Q9DBP5	UMP-CMP kinase	Cmpk1	18	7	1.846	985632	1.66939e+06
Q80TM9	Nischarin	Nisch	5	4	1.845	60357.7	111337
Q60931	Voltage-dependent anion-selective channel protein 3	Vdac3	68	9	1.842	4.49535e+07	7.0547e+07
P28660	Nck-associated protein 1	Nckap1	50	19	1.842	3.45544e+06	6.60012e+06
Q9R1R2	Tripartite motif-containing protein 3	Trim3	9	4	1.842	154280	284140
O88342	WD repeat-containing protein 1	Wdr1	48	15	1.841	6.22757e+06	1.19943e+07
Q8K3H0	DCC-interacting protein 13-alpha	Appl1	15	5	1.841	259702	558721
Q8R0S2	IQ motif and SEC7 domain-containing protein 1	Iqsec1	34	9	1.837	1.20917e+06	2.0624e+06
P05132	cAMP-dependent protein kinase catalytic subunit alpha	Prkaca	23	3	1.836	2.67328e+06	5.08111e+06
P43006	Excitatory amino acid transporter 2	Slc1a2	157	16	1.834	6.27869e+07	1.30118e+08
Q61879	Myosin-10	Myh10	55	21	1.833	965741	1.94722e+06
Q9WV92	Band 4.1-like protein 3	Epb41l3	53	10	1.833	2.16693e+06	4.00107e+06
Q7TME0	Phospholipid phosphatase-related protein type 4	Plppr4	8	4	1.831	449864	823606
Q8K2B3	Succinate dehydrogenase	Sdha	93	19	1.829	7.48896e+06	1.4328e+07
Q921M7	CYFIP-related Rac1 interactor B	Cyrib	36	8	1.828	1.73143e+06	3.86192e+06
Q922Q4	Pyrroline-5-carboxylate reductase 2	Pycr2	5	4	1.826	302551	552532
Q64332	Synapsin-2	Syn2	174	18	1.825	3.00173e+07	5.07755e+07
Q9CZD3	Glycine--tRNA ligase	Gars1	12	4	1.821	103000	187527
Q9WV55	Vesicle-associated membrane protein-associated protein A	Vapa	37	6	1.82	1.54222e+06	2.24411e+06
Q9JMH6	Thioredoxin reductase 1, cytoplasmic	Txnrd1	11	3	1.82	114014	207471
P60766	Cell division control protein 42 homolog	Cdc42	43	7	1.818	3.7772e+06	6.76554e+06
Q9Z0P5	Twinfilin-2	Twf2	11	4	1.815	169745	308100
Q64521	Glycerol-3-phosphate dehydrogenase, mitochondrial	Gpd2	122	29	1.809	9.19327e+06	1.54029e+07
D3Z7P3	Glutaminase kidney isoform, mitochondrial	Gls	98	18	1.809	9.81941e+06	1.84539e+07
O35633	Vesicular inhibitory amino acid transporter	Slc32a1	31	9	1.808	1.59306e+06	3.18481e+06
Q9WUM5	Succinate--CoA ligase	Suclg1	68	8	1.806	7.14943e+06	1.29249e+07
Q5SQX6	Cytoplasmic FMR1-interacting protein 2	Cyfip2	97	18	1.805	4.84035e+06	9.81852e+06
P20029	Endoplasmic reticulum chaperone BiP	Hspa5	70	13	1.803	2.74602e+06	5.20848e+06
Q9D710	Thioredoxin-related transmembrane protein 2	Tmx2	14	6	1.802	549908	977826
Q9CR95	Adaptin ear-binding coat-associated protein 1	Necap1	19	5	1.801	985821	1.91468e+06
Q56A07	Sodium channel subunit beta-2	Scn2b	29	6	1.8	3.75919e+06	6.94323e+06
Q6ZWN5	40S ribosomal protein S9	Rps9	18	5	1.798	1.72321e+06	3.05399e+06
Q9CX34	Protein SGT1 homolog	Sugt1	5	3	1.797	248382	446295
P62881	Guanine nucleotide-binding protein subunit beta-5	Gnb5	16	5	1.795	1.9777e+06	4.4659e+06
Q9QYR9	Acyl-coenzyme A thioesterase 2, mitochondrial	Acot2	10	4	1.795	288474	509489
Q9Z2U0	Proteasome subunit alpha type-7	Psma7	19	6	1.792	1.12516e+06	1.58556e+06
P08752	Guanine nucleotide-binding protein G(i) subunit alpha-2	Gnai2	90	8	1.791	1.50907e+06	2.27326e+06
Q6PHN9	Ras-related protein Rab-35	Rab35	20	3	1.79	5.36011e+06	9.60282e+06
Q921G7	Electron transfer flavoprotein-ubiquinone oxidoreductase, mitochondrial	Etfdh	14	8	1.789	2.15954e+06	4.26866e+06
P46096	Synaptotagmin-1	Syt1	148	11	1.786	3.81852e+07	6.94356e+07
Q91V61	Sideroflexin-3	Sfxn3	44	9	1.785	7.43766e+06	1.48664e+07
Q61699	Heat shock protein 105 kDa	Hsph1	79	21	1.782	3.8736e+06	9.67407e+06
P46471	26S proteasome regulatory subunit 7	Psmc2	12	5	1.781	284075	666430
P39053	Dynamin-1	Dnm1	308	36	1.78	6.45117e+07	1.1639e+08
O08788	Dynactin subunit 1	Dctn1	33	15	1.776	896555	1.40087e+06
Q9DCJ5	NADH dehydrogenase	Ndufa8	19	7	1.775	1.42558e+06	3.72088e+06
O35409	Glutamate carboxypeptidase 2	Folh1	3	3	1.774	26486.7	46988
Q8BP47	Asparagine--tRNA ligase, cytoplasmic	NARS1	15	7	1.771	238642	422628
P50518	V-type proton ATPase subunit E 1	Atp6v1e1	40	8	1.764	2.80551e+06	4.47893e+06
Q9WTS5	Teneurin-2	Tenm2	14	9	1.762	127901	412910
P35278	Ras-related protein Rab-5C	Rab5c	19	4	1.76	2.51088e+06	4.91803e+06
P51863	V-type proton ATPase subunit d 1	Atp6v0d1	72	15	1.759	1.20375e+07	2.1346e+07
Q8CHH9	Septin-8	Septin8	62	10	1.758	4.24581e+06	8.04319e+06
P14115	60S ribosomal protein L27a	Rpl27a	14	3	1.757	1.49716e+06	2.80413e+06
P62880	Guanine nucleotide-binding protein G(I)/G(S)/G(T) subunit beta-2	Gnb2	120	5	1.751	1.46094e+07	2.51703e+07
P70168	Importin subunit beta-1	Kpnb1	40	12	1.75	1.59563e+06	2.5086e+06
P97807	Fumarate hydratase, mitochondrial	Fh	37	11	1.748	2.57498e+06	4.11698e+06
P62830	60S ribosomal protein L23	Rpl23	17	4	1.746	865881	1.42614e+06
P14733	Lamin-B1	Lmnb1	20	5	1.743	516213	905541
Q9D0L7	Armadillo repeat-containing protein 10	Armc10	4	4	1.742	367745	605592
P25444	40S ribosomal protein S2	Rps2	22	9	1.741	1.52883e+06	3.07945e+06
Q9EQ20	Methylmalonate-semialdehyde dehydrogenase	Aldh6a1	35	11	1.74	1.143e+06	1.99964e+06
Q8CAA7	Glucose 1,6-bisphosphate synthase	Pgm2l1	20	6	1.74	1.43741e+06	2.78644e+06
Q3TXX4	Vesicular glutamate transporter 1	Slc17a7	65	9	1.739	1.66619e+07	2.41115e+07
P62267	40S ribosomal protein S23	Rps23	9	3	1.733	402503	718957
Q0VBD0	Integrin beta-8	Itgb8	14	5	1.732	3.87967e+06	3.70848e+06
Q9EQF6	Dihydropyrimidinase-related protein 5	Dpysl5	92	23	1.732	1.00802e+07	1.93292e+07
P62245	40S ribosomal protein S15a	Rps15a	30	7	1.727	2.48539e+06	4.78492e+06
P47757	F-actin-capping protein subunit beta	Capzb	52	11	1.727	6.37077e+06	1.08543e+07
P35802	Neuronal membrane glycoprotein M6-a	Gpm6a	61	7	1.727	3.96478e+07	6.57151e+07
P50396	Rab GDP dissociation inhibitor alpha	Gdi1	119	15	1.726	1.72761e+07	3.5281e+07
Q9D8N0	Elongation factor 1-gamma	Eef1g	25	8	1.726	2.30236e+06	4.99562e+06
Q9D6M3	Mitochondrial glutamate carrier 1	Slc25a22	69	9	1.725	1.3174e+07	2.5339e+07
Q60932	Voltage-dependent anion-selective channel protein 1	Vdac1	186	17	1.724	8.16672e+07	1.4091e+08
P52480	Pyruvate kinase PKM	Pkm	248	26	1.719	5.44825e+07	1.00069e+08
Q9CXW4	60S ribosomal protein L11	Rpl11	15	3	1.719	751995	1.29232e+06
Q9Z1B3	1-phosphatidylinositol 4,5-bisphosphate phosphodiesterase beta-1	Plcb1	39	19	1.718	1.7218e+06	3.68601e+06
Q811D0	Disks large homolog 1	Dlg1	49	10	1.717	1.0314e+06	1.61737e+06
P70404	Isocitrate dehydrogenase	Idh3g	52	11	1.713	6.97233e+06	1.23354e+07
Q8VDM4	26S proteasome non-ATPase regulatory subunit 2	Psmd2	14	9	1.713	351492	602389
P84309	Adenylate cyclase type 5	Adcy5	16	4	1.713	497896	842383
Q9Z0E0	Neurochondrin	Ncdn	91	21	1.713	1.15422e+07	2.05361e+07
Q8C0M9	Isoaspartyl peptidase/L-asparaginase	Asrgl1	49	9	1.71	5.57655e+06	9.10498e+06
Q6ZQ38	Cullin-associated NEDD8-dissociated protein 1	Cand1	104	28	1.71	5.73485e+06	9.59987e+06
Q9DBF1	Alpha-aminoadipic semialdehyde dehydrogenase	Aldh7a1	17	8	1.708	1.36983e+06	1.0165e+06
P27773	Protein disulfide-isomerase A3	Pdia3	40	18	1.705	2.00702e+06	3.63789e+06
Q8BGZ1	Hippocalcin-like protein 4	Hpcal4	55	4	1.699	1.26003e+06	1.72625e+06
P10649	Glutathione S-transferase Mu 1	Gstm1	59	9	1.699	7.27268e+06	1.3324e+07
Q9DBG3	AP-2 complex subunit beta	Ap2b1	155	15	1.698	2.36442e+07	4.15669e+07
O70133	ATP-dependent RNA helicase A	Dhx9	30	12	1.698	756750	1.25095e+06
Q60875	Rho guanine nucleotide exchange factor 2	Arhgef2	22	11	1.694	299582	507518
Q9DBS2	Tumor protein p63-regulated gene 1-like protein	Tprg1l	10	5	1.694	564051	891303
P14094	Sodium/potassium-transporting ATPase subunit beta-1	Atp1b1	150	14	1.689	1.03357e+08	1.79444e+08
Q61187	Tumor susceptibility gene 101 protein	Tsg101	5	3	1.689	69621.7	117558
Q9D051	Pyruvate dehydrogenase E1 component subunit beta, mitochondrial	Pdhb	123	14	1.688	1.32454e+07	2.58325e+07
Q61316	Heat shock 70 kDa protein 4	Hspa4	86	19	1.687	5.10537e+06	8.13001e+06
O08599	Syntaxin-binding protein 1	Stxbp1	317	38	1.686	1.23284e+08	2.02326e+08
Q8K0U4	Heat shock 70 kDa protein 12A	Hspa12a	80	21	1.685	3.45183e+06	5.79313e+06
P11499	Heat shock protein HSP 90-beta	Hsp90ab1	165	18	1.683	1.94558e+07	3.50105e+07
Q5U458	DnaJ homolog subfamily C member 11	Dnajc11	20	6	1.682	158632	266760
P51174	Long-chain specific acyl-CoA dehydrogenase, mitochondrial	Acadl	7	3	1.681	319894	537697
Q9D0F9	Phosphoglucomutase-1	Pgm1	14	6	1.678	450930	969719
Q9CZ13	Cytochrome b-c1 complex subunit 1, mitochondrial	Uqcrc1	149	19	1.675	3.00205e+07	4.68497e+07
Q9Z268	RasGAP-activating-like protein 1	Rasal1	59	18	1.675	3.63503e+06	6.91307e+06
O35098	Dihydropyrimidinase-related protein 4	Dpysl4	73	20	1.675	5.3767e+06	9.30355e+06
Q61548	Clathrin coat assembly protein AP180	Snap91	63	10	1.674	5.9021e+06	9.83087e+06
Q9QYC0	Alpha-adducin	Add1	47	11	1.673	1.85547e+06	3.27885e+06
O70589	Peripheral plasma membrane protein CASK	Cask	36	16	1.672	2.69949e+06	4.90514e+06
P62897	Cytochrome c, somatic	Cycs	35	5	1.672	1.39056e+07	2.29348e+07
P35279	Ras-related protein Rab-6A	Rab6a	33	3	1.67	3.24709e+06	5.68604e+06
Q8VE33	Ganglioside-induced differentiation-associated protein 1-like 1	Gdap1l1	20	7	1.67	1.15648e+06	2.21581e+06
P28663	Beta-soluble NSF attachment protein	Napb	77	17	1.67	7.41411e+06	1.3047e+07
Q6P1F6	Serine/threonine-protein phosphatase 2A 55 kDa regulatory subunit B alpha isoform	Ppp2r2a	37	8	1.669	2.26754e+06	3.91218e+06
P47802	Metaxin-1	Mtx1	6	4	1.669	362238	686478
E9Q3L2	Phosphatidylinositol 4-kinase alpha	Pi4ka	22	11	1.669	346029	588948
P55264	Adenosine kinase	Adk	13	5	1.668	173159	288758
P47754	F-actin-capping protein subunit alpha-2	Capza2	38	8	1.666	5.70834e+06	1.05653e+07
Q9D892	Inosine triphosphate pyrophosphatase	Itpa	16	4	1.665	668327	1.43273e+06
P16330	2',3'-cyclic-nucleotide 3'-phosphodiesterase	Cnp	314	30	1.664	1.28044e+08	2.26009e+08
P27601	Guanine nucleotide-binding protein subunit alpha-13	Gna13	39	8	1.663	2.49709e+07	3.96182e+07
P62908	40S ribosomal protein S3	Rps3	37	11	1.662	1.99197e+06	3.43718e+06
Q99P72	Reticulon-4	Rtn4	21	7	1.661	1.44857e+06	1.81747e+06
P63044	Vesicle-associated membrane protein 2	Vamp2	10	3	1.661	1.18047e+07	1.82076e+07
P17809	Solute carrier family 2, facilitated glucose transporter member 1	Slc2a1	11	3	1.661	1.43208e+06	2.32051e+06
P70704	Phospholipid-transporting ATPase IA	Atp8a1	21	9	1.66	777073	1.29415e+06
P19096	Fatty acid synthase	Fasn	66	31	1.659	2.30883e+06	4.1142e+06
Q8CDN6	Thioredoxin-like protein 1	Txnl1	10	3	1.657	261183	432775
Q8R191	Synaptogyrin-3	Syngr3	9	3	1.656	2.50335e+06	4.23129e+06
O70443	Guanine nucleotide-binding protein G(z) subunit alpha	Gnaz	63	12	1.656	4.05643e+06	6.98711e+06
Q9D1G5	Leucine-rich repeat-containing protein 57	Lrrc57	6	4	1.653	217789	360111
Q9JJK2	LanC-like protein 2	Lancl2	42	12	1.651	2.78593e+06	5.48114e+06
G5E8K5	Ankyrin-3	Ank3	36	11	1.65	607865	814705
Q4KMM3	Oxidation resistance protein 1	Oxr1	26	11	1.649	749799	1.29388e+06
Q9CR16	Peptidyl-prolyl cis-trans isomerase D	Ppid	7	3	1.646	434577	642130
P63001	Ras-related C3 botulinum toxin substrate 1	Rac1	77	7	1.644	1.87144e+07	3.23991e+07
Q9D6F9	Tubulin beta-4A chain	Tubb4a	840	5	1.642	3.41847e+07	5.46421e+07
P62702	40S ribosomal protein S4, X isoform	Rps4x	40	11	1.641	2.52832e+06	4.20879e+06
Q9CR68	Cytochrome b-c1 complex subunit Rieske, mitochondrial	Uqcrfs1	27	6	1.639	1.85275e+06	3.16877e+06
P33173	Kinesin-like protein KIF1A	Kif1a	9	6	1.638	504842	677079
Q9QZ06	Toll-interacting protein	Tollip	11	3	1.638	1.0607e+06	2.30879e+06
Q3UYC0	Protein phosphatase 1H	Ppm1h	23	11	1.638	608829	1.1288e+06
P15864	Histone H1.2	H1-2	25	3	1.637	3.85802e+06	6.18132e+06
P48758	Carbonyl reductase	Cbr1	30	6	1.636	2.47071e+06	4.0941e+06
P35564	Calnexin	Canx	22	8	1.634	2.19169e+06	3.36392e+06
Q9EQH3	Vacuolar protein sorting-associated protein 35	Vps35	46	16	1.63	3.90069e+06	5.66005e+06
P62082	40S ribosomal protein S7	Rps7	6	4	1.629	172064	280317
Q9CPP6	NADH dehydrogenase	Ndufa5	13	3	1.628	1.93065e+06	3.14256e+06
Q80TJ1	Calcium-dependent secretion activator 1	Cadps	78	22	1.628	4.99463e+06	9.3316e+06
Q69ZU6	Thrombospondin type-1 domain-containing protein 7A	Thsd7a	9	4	1.627	133448	363373
P16054	Protein kinase C epsilon type	Prkce	15	5	1.623	233306	417057
Q9CZW5	Mitochondrial import receptor subunit TOM70	Tomm70	57	16	1.623	1.16247e+07	1.97498e+07
Q8BVQ5	Protein phosphatase methylesterase 1	Ppme1	9	5	1.622	667541	1.14193e+06
Q02053	Ubiquitin-like modifier-activating enzyme 1	Uba1	119	28	1.621	1.11842e+07	2.01542e+07
P00405	Cytochrome c oxidase subunit 2	Mtco2	66	5	1.62	5.07401e+07	7.21035e+07
O35129	Prohibitin-2	Phb2	34	9	1.618	1.93935e+06	3.38498e+06
Q8R127	Saccharopine dehydrogenase-like oxidoreductase	Sccpdh	22	6	1.618	1.85312e+06	3.08774e+06
P16858	Glyceraldehyde-3-phosphate dehydrogenase	Gapdh	311	16	1.616	2.07067e+08	3.55967e+08
Q8BG32	26S proteasome non-ATPase regulatory subunit 11	Psmd11	9	4	1.616	101885	164650
B2RSH2	Guanine nucleotide-binding protein G(i) subunit alpha-1	Gnai1	76	8	1.615	1.02075e+07	1.65489e+07
Q8BMS1	Trifunctional enzyme subunit alpha, mitochondrial	Hadha	30	15	1.61	932720	1.45154e+06
O70318	Band 4.1-like protein 2	Epb41l2	30	8	1.61	754476	1.27245e+06
Q9JII6	Aldo-keto reductase family 1 member A1	Akr1a1	29	9	1.61	1.22064e+06	1.99985e+06
P06151	L-lactate dehydrogenase A chain	Ldha	90	14	1.609	2.44023e+07	4.59828e+07
Q8CGY8	UDP-N-acetylglucosamine--peptide N-acetylglucosaminyltransferase 110 kDa subunit	Ogt	25	13	1.606	636833	998630
P47963	60S ribosomal protein L13	Rpl13	15	5	1.604	600415	1.31014e+06
Q8BK64	Activator of 90 kDa heat shock protein ATPase homolog 1	Ahsa1	16	4	1.604	449519	720908
O55131	Septin-7	Septin7	107	15	1.603	1.41702e+07	2.29993e+07
Q60634	Flotillin-2	Flot2	9	4	1.603	329251	527649
P56399	Ubiquitin carboxyl-terminal hydrolase 5	Usp5	83	19	1.601	4.32609e+06	6.84791e+06
Q71LX4	Talin-2	Tln2	15	9	1.601	250309	400635
Q61327	Sodium-dependent dopamine transporter	Slc6a3	12	3	1.599	191440	306167
Q8K1M6	Dynamin-1-like protein	Dnm1l	61	18	1.598	6.30319e+06	1.05095e+07
Q91X97	Neurocalcin-delta	Ncald	28	4	1.597	973087	1.49555e+06
Q60864	Stress-induced-phosphoprotein 1	Stip1	15	7	1.597	809328	1.30835e+06
P27659	60S ribosomal protein L3	Rpl3	12	5	1.596	1.12017e+06	1.62686e+06
Q8R071	Inositol-trisphosphate 3-kinase A	Itpka	27	11	1.596	613110	1.10107e+06
P32883	GTPase KRas	Kras	40	3	1.595	1.20779e+06	2.26344e+06
Q3TXS7	26S proteasome non-ATPase regulatory subunit 1	Psmd1	8	5	1.595	3.01048e+06	4.37883e+06
Q9D0M3	Cytochrome c1, heme protein, mitochondrial	Cyc1	34	6	1.591	2.69842e+06	4.22892e+06
P62814	V-type proton ATPase subunit B, brain isoform	Atp6v1b2	165	24	1.59	1.73472e+07	2.79627e+07
Q9QXS6	Drebrin	Dbn1	16	6	1.589	588834	935855
Q3UHB1	5'-nucleotidase domain-containing protein 3	Nt5dc3	9	3	1.589	378786	633865
P61082	NEDD8-conjugating enzyme Ubc12	Ube2m	19	7	1.587	1.50296e+06	2.29633e+06
P62874	Guanine nucleotide-binding protein G(I)/G(S)/G(T) subunit beta-1	Gnb1	117	6	1.586	5.68619e+07	1.07566e+08
Q9JJV5	Voltage-dependent calcium channel gamma-3 subunit	Cacng3	8	3	1.585	464250	736020
Q9CQC7	NADH dehydrogenase	Ndufb4	18	5	1.585	1.25765e+06	1.94249e+06
Q9QUI0	Transforming protein RhoA	Rhoa	67	8	1.585	1.06318e+07	1.67434e+07
P58389	Serine/threonine-protein phosphatase 2A activator	Ptpa	12	3	1.583	274311	434291
Q01853	Transitional endoplasmic reticulum ATPase	Vcp	138	31	1.58	1.35498e+07	2.13827e+07
Q2PFD7	PH and SEC7 domain-containing protein 3	Psd3	24	8	1.576	1.41962e+06	1.65524e+06
Q61425	Hydroxyacyl-coenzyme A dehydrogenase, mitochondrial	Hadh	9	3	1.575	225662	355378
P32037	Solute carrier family 2, facilitated glucose transporter member 3	Slc2a3	23	5	1.574	3.73879e+06	5.81674e+06
P42932	T-complex protein 1 subunit theta	Cct8	48	18	1.573	3.12711e+06	5.45123e+06
O88543	COP9 signalosome complex subunit 3	Cops3	6	3	1.573	120130	189019
Q8R555	Cartilage acidic protein 1	Crtac1	14	6	1.573	468505	737164
Q9R0P3	S-formylglutathione hydrolase	Esd	32	8	1.569	1.35006e+06	2.11319e+06
P42669	Transcriptional activator protein Pur-alpha	Pura	20	6	1.568	2.85281e+06	4.35638e+06
Q99LC5	Electron transfer flavoprotein subunit alpha, mitochondrial	Etfa	24	8	1.568	1.46952e+06	2.23888e+06
Q9R1T4	Septin-6	Septin6	61	6	1.567	2.56665e+06	5.40478e+06
Q80SW1	S-adenosylhomocysteine hydrolase-like protein 1	Ahcyl1	46	8	1.566	1.66125e+09	1.3809e+09
P24369	Peptidyl-prolyl cis-trans isomerase B	Ppib	33	8	1.564	1.05732e+06	2.10481e+06
Q11011	Puromycin-sensitive aminopeptidase	Npepps	54	18	1.564	9.7339e+06	8.38599e+06
P38647	Stress-70 protein, mitochondrial	Hspa9	64	21	1.563	8.25462e+06	1.16591e+07
Q6PER3	Microtubule-associated protein RP/EB family member 3	Mapre3	31	8	1.563	1.82478e+06	2.83614e+06
Q8R0S4	Voltage-dependent L-type calcium channel subunit beta-4	Cacnb4	12	4	1.562	668316	1.0396e+06
Q9CQN1	Heat shock protein 75 kDa, mitochondrial	Trap1	12	4	1.562	4.34659e+06	6.79032e+06
P20357	Microtubule-associated protein 2	Map2	39	11	1.562	1.71327e+06	2.82748e+06
P14873	Microtubule-associated protein 1B	Map1b	56	19	1.561	2.57271e+06	6.43561e+06
Q3UMR5	Calcium uniporter protein, mitochondrial	Mcu	10	6	1.561	671129	1.0413e+06
Q9CQ69	Cytochrome b-c1 complex subunit 8	Uqcrq	18	3	1.554	2.84703e+06	4.39767e+06
Q920P5	Adenylate kinase isoenzyme 5	Ak5	11	5	1.553	240653	373702
Q9CQA3	Succinate dehydrogenase	Sdhb	36	11	1.552	4.19453e+06	4.95851e+06
Q8BUV3	Gephyrin	Gphn	28	11	1.551	859987	1.29671e+06
Q9Z2Q6	Septin-5	Septin5	74	14	1.55	9.83671e+06	1.60777e+07
Q9WV34	MAGUK p55 subfamily member 2	Mpp2	35	12	1.55	2.12488e+06	3.30767e+06
P29758	Ornithine aminotransferase, mitochondrial	Oat	18	6	1.549	516499	784273
Q76MZ3	Serine/threonine-protein phosphatase 2A 65 kDa regulatory subunit A alpha isoform	Ppp2r1a	158	26	1.549	1.86421e+07	2.78669e+07
P70372	ELAV-like protein 1	Elavl1	14	7	1.547	670215	1.03458e+06
Q03265	ATP synthase subunit alpha, mitochondrial	Atp5f1a	345	31	1.547	1.36973e+08	2.13976e+08
Q8R570	Synaptosomal-associated protein 47	Snap47	14	7	1.546	402281	621758
P61226	Ras-related protein Rap-2b	Rap2b	43	5	1.546	5.0413e+06	6.41115e+06
P14685	26S proteasome non-ATPase regulatory subunit 3	Psmd3	10	6	1.545	1.40322e+06	2.62113e+06
Q5PR73	GTP-binding protein Di-Ras2	Diras2	23	6	1.544	2.20413e+06	2.93161e+06
P14211	Calreticulin	Calr	35	11	1.543	4.90607e+06	7.49475e+06
P80316	T-complex protein 1 subunit epsilon	Cct5	20	6	1.541	627719	939596
P28474	Alcohol dehydrogenase class-3	Adh5	15	7	1.541	226062	540070
Q9Z0X1	Apoptosis-inducing factor 1, mitochondrial	Aifm1	11	5	1.54	154326	237711
O70161	Phosphatidylinositol 4-phosphate 5-kinase type-1 gamma	Pip5k1c	21	9	1.54	657198	1.19618e+06
P49615	Cyclin-dependent kinase 5	Cdk5	13	5	1.539	1.1776e+06	1.87455e+06
Q9Z0S1	3'(2'),5'-bisphosphate nucleotidase 1	Bpnt1	16	5	1.538	1.18356e+06	1.75878e+06
P28652	Calcium/calmodulin-dependent protein kinase type II subunit beta	Camk2b	168	10	1.538	1.26193e+07	1.90906e+07
P70336	Rho-associated protein kinase 2	Rock2	4	3	1.537	173652	266977
Q8BIZ1	Ankyrin repeat and sterile alpha motif domain-containing protein 1B	Anks1b	21	7	1.537	1.32465e+06	1.94315e+06
P48774	Glutathione S-transferase Mu 5	Gstm5	60	11	1.536	9.76797e+06	1.70409e+07
P35235	Tyrosine-protein phosphatase non-receptor type 11	Ptpn11	6	5	1.534	156894	240629
P05063	Fructose-bisphosphate aldolase C	Aldoc	164	20	1.533	1.89957e+07	2.95422e+07
P35979	60S ribosomal protein L12	Rpl12	25	6	1.531	3.19317e+06	5.17548e+06
P08113	Endoplasmin	Hsp90b1	46	13	1.531	2.51699e+06	3.3897e+06
Q9D2M8	Ubiquitin-conjugating enzyme E2 variant 2	Ube2v2	26	5	1.531	3.19486e+06	4.2695e+06
P62823	Ras-related protein Rab-3C	Rab3c	44	5	1.53	3.49346e+06	6.22335e+06
Q9D0R2	Threonine--tRNA ligase 1, cytoplasmic	Tars1	8	3	1.529	179409	274373
O89053	Coronin-1A	Coro1a	48	11	1.529	3.82377e+06	6.04828e+06
Q8BGH2	Sorting and assembly machinery component 50 homolog	Samm50	53	13	1.529	4.09731e+06	6.52881e+06
Q8BWT1	3-ketoacyl-CoA thiolase, mitochondrial	Acaa2	14	6	1.528	602278	886220
Q8BMF4	Dihydrolipoyllysine-residue acetyltransferase component of pyruvate dehydrogenase complex, mitochondrial	Dlat	73	15	1.527	9.73974e+06	1.50713e+07
P46460	Vesicle-fusing ATPase	Nsf	258	43	1.526	5.41401e+07	8.69715e+07
Q9WVJ2	26S proteasome non-ATPase regulatory subunit 13	Psmd13	20	6	1.523	784005	1.18684e+06
P70175	Disks large homolog 3	Dlg3	19	8	1.523	591852	938372
P68254	14-3-3 protein theta	Ywhaq	113	10	1.52	1.80558e+07	2.54959e+07
Q3UHJ0	AP2-associated protein kinase 1	Aak1	31	14	1.518	668033	1.13452e+06
Q641P0	Actin-related protein 3B	Actr3b	54	9	1.517	4.34774e+06	5.56841e+06
Q9QYF9	Protein NDRG3	Ndrg3	25	8	1.517	4.4054e+06	5.94633e+06
Q8BVI4	Dihydropteridine reductase	Qdpr	26	8	1.516	2.84189e+06	4.59714e+06
O35526	Syntaxin-1A	Stx1a	35	9	1.515	5.72098e+08	3.57752e+08
Q9Z2I9	Succinate--CoA ligase	Sucla2	43	13	1.514	8.34097e+06	1.30546e+07
O88544	COP9 signalosome complex subunit 4	Cops4	8	4	1.514	225946	342039
P15105	Glutamine synthetase	Glul	191	17	1.514	6.16383e+07	1.02852e+08
Q6GQS1	Calcium-binding mitochondrial carrier protein SCaMC-3	Slc25a23	5	5	1.514	72198.4	109276
Q8BZ98	Dynamin-3	Dnm3	88	7	1.513	3.83608e+06	5.64075e+06
Q9R1P1	Proteasome subunit beta type-3	Psmb3	6	3	1.512	386198	583986
P80313	T-complex protein 1 subunit eta	Cct7	31	10	1.51	3.82023e+06	5.69123e+06
Q8BH66	Atlastin-1	Atl1	32	12	1.509	1.65456e+06	2.89413e+06
P14148	60S ribosomal protein L7	Rpl7	19	5	1.509	1.28683e+06	1.79138e+06
Q8R0Y6	Cytosolic 10-formyltetrahydrofolate dehydrogenase	Aldh1l1	37	12	1.508	435703	678964
Q99MR8	Methylcrotonoyl-CoA carboxylase subunit alpha, mitochondrial	Mccc1	438	38	1.508	1.23485e+08	1.89787e+08
P06801	NADP-dependent malic enzyme	Me1	18	5	1.507	184400	277901
Q9WV60	Glycogen synthase kinase-3 beta	Gsk3b	32	8	1.507	4.31898e+06	3.91288e+06
P50516	V-type proton ATPase catalytic subunit A	Atp6v1a	204	31	1.506	3.69338e+07	5.79621e+07
Q99LD4	COP9 signalosome complex subunit 1	Gps1	5	3	1.506	174023	262057
Q6A4J8	Ubiquitin carboxyl-terminal hydrolase 7	Usp7	5	3	1.505	775846	1.16803e+06
Q3V3R1	Monofunctional C1-tetrahydrofolate synthase, mitochondrial	Mthfd1l	15	7	1.505	176406	265557
Q91VZ6	Stromal membrane-associated protein 1	Smap1	6	3	1.504	1.25272e+06	1.8608e+06
P26883	Peptidyl-prolyl cis-trans isomerase FKBP1A	Fkbp1a	10	3	1.502	1.34464e+06	1.48237e+06
Q64105	Sepiapterin reductase	Spr	22	6	1.5	945141	1.40568e+06
O35643	AP-1 complex subunit beta-1	Ap1b1	100	8	1.499	1.83979e+06	2.76889e+06
O55022	Membrane-associated progesterone receptor component 1	Pgrmc1	7	3	1.499	424517	643934
P08551	Neurofilament light polypeptide	Nefl	91	17	1.498	9.70497e+06	1.50397e+07
O55125	Protein NipSnap homolog 1	Nipsnap1	22	7	1.498	2.16964e+06	2.66312e+06
Q99LC3	NADH dehydrogenase	Ndufa10	30	10	1.497	4.10538e+06	5.66883e+06
P35980	60S ribosomal protein L18	Rpl18	13	6	1.496	1.47288e+06	2.34509e+06
Q99L43	Phosphatidate cytidylyltransferase 2	Cds2	11	4	1.494	692156	1.17207e+06
Q8BWM0	Prostaglandin E synthase 2	Ptges2	18	9	1.494	905921	1.29191e+06
P21278	Guanine nucleotide-binding protein subunit alpha-11	Gna11	41	5	1.494	4.9056e+06	7.43801e+06
P63318	Protein kinase C gamma type	Prkcg	133	28	1.494	1.86267e+07	2.91671e+07
Q61990	Poly(rC)-binding protein 2	Pcbp2	36	5	1.493	1.86772e+06	2.70875e+06
P14131	40S ribosomal protein S16	Rps16	17	3	1.493	5.69019e+06	2.64162e+06
Q99JY8	Phospholipid phosphatase 3	Plpp3	7	3	1.493	589633	791292
P09411	Phosphoglycerate kinase 1	Pgk1	138	24	1.492	3.25589e+07	4.80307e+07
Q9Z1S5	Neuronal-specific septin-3	Septin3	21	7	1.49	7.05992e+06	9.37166e+06
P61264	Syntaxin-1B	Stx1b	63	12	1.487	1.77664e+07	2.22545e+07
Q9D1G1	Ras-related protein Rab-1B	Rab1b	30	4	1.487	2.96874e+06	4.68444e+06
P28738	Kinesin heavy chain isoform 5C	Kif5c	37	8	1.487	1.90401e+06	2.4959e+06
Q9D8E6	60S ribosomal protein L4	Rpl4	22	11	1.487	1.47812e+06	2.27781e+06
Q8C1B7	Septin-11	Septin11	86	8	1.483	1.81378e+07	2.87632e+07
Q8BH95	Enoyl-CoA hydratase, mitochondrial	Echs1	27	7	1.482	3.01833e+06	3.74802e+06
Q9DC61	Mitochondrial-processing peptidase subunit alpha	Pmpca	7	4	1.482	310903	472674
P26638	Serine--tRNA ligase, cytoplasmic	Sars1	17	8	1.482	393324	582815
P13707	Glycerol-3-phosphate dehydrogenase	Gpd1	26	8	1.481	1.97983e+06	3.04567e+06
P48678	Prelamin-A/C	Lmna	31	13	1.48	803685	1.17399e+06
P61922	4-aminobutyrate aminotransferase, mitochondrial	Abat	129	24	1.479	1.53468e+07	2.35453e+07
O55143	Sarcoplasmic/endoplasmic reticulum calcium ATPase 2	Atp2a2	226	41	1.479	2.67858e+07	4.32817e+07
Q9R111	Guanine deaminase	Gda	85	20	1.477	1.19407e+07	1.83284e+07
Q6PHZ2	Calcium/calmodulin-dependent protein kinase type II subunit delta	Camk2d	112	6	1.476	1.50396e+06	2.21605e+06
Q8JZQ2	AFG3-like protein 2	Afg3l2	17	4	1.473	103535	152545
Q7TQI3	Ubiquitin thioesterase OTUB1	Otub1	46	10	1.473	7.14177e+06	9.51288e+06
P60867	40S ribosomal protein S20	Rps20	18	3	1.472	3.00534e+06	4.22823e+06
Q9DC70	NADH dehydrogenase	Ndufs7	12	4	1.471	629143	3.8055e+06
Q9JJV2	Profilin-2	Pfn2	32	4	1.47	4.3755e+06	6.342e+06
P30275	Creatine kinase U-type, mitochondrial	Ckmt1	229	17	1.47	5.30706e+07	8.54313e+07
P84096	Rho-related GTP-binding protein RhoG	Rhog	14	6	1.469	174567	256364
P63017	Heat shock cognate 71 kDa protein	Hspa8	302	20	1.467	8.32323e+07	1.18036e+08
P63085	Mitogen-activated protein kinase 1	Mapk1	53	9	1.467	8.82676e+06	1.31944e+07
Q7TSJ2	Microtubule-associated protein 6	Map6	30	13	1.466	344253	499416
Q9D358	Low molecular weight phosphotyrosine protein phosphatase	Acp1	14	3	1.466	1.9718e+06	3.24239e+06
P14206	40S ribosomal protein SA	Rpsa	23	6	1.466	1.33466e+06	1.84544e+06
Q9QXZ0	Microtubule-actin cross-linking factor 1, isoforms 1/2/3/4	Macf1	27	16	1.465	444997	684345
P63321	Ras-related protein Ral-A	Rala	18	4	1.465	2.36703e+06	2.86589e+06
Q99KI0	Aconitate hydratase, mitochondrial	Aco2	260	39	1.464	1.20321e+08	1.48357e+08
P31938	Dual specificity mitogen-activated protein kinase kinase 1	Map2k1	62	9	1.463	5.98464e+06	8.5678e+06
Q8VEK3	Heterogeneous nuclear ribonucleoprotein U	Hnrnpu	42	13	1.462	3.41327e+06	4.84493e+06
P48318	Glutamate decarboxylase 1	Gad1	24	10	1.462	389917	543811
Q9D7G0	Ribose-phosphate pyrophosphokinase 1	Prps1	7	5	1.46	531880	721103
P99024	Tubulin beta-5 chain	Tubb5	905	5	1.46	1.11073e+08	1.57125e+08
P68510	14-3-3 protein eta	Ywhah	90	9	1.46	1.25365e+07	1.78786e+07
P70296	Phosphatidylethanolamine-binding protein 1	Pebp1	73	11	1.458	2.19827e+07	2.83098e+07
Q3UHL1	CaM kinase-like vesicle-associated protein	Camkv	99	23	1.456	9.52591e+06	1.42011e+07
P14152	Malate dehydrogenase, cytoplasmic	Mdh1	90	9	1.454	2.68538e+07	4.34262e+07
P29341	Polyadenylate-binding protein 1	Pabpc1	16	8	1.453	924796	1.63077e+06
Q8BGX2	Mitochondrial import inner membrane translocase subunit Tim29	Timm29	10	3	1.452	124473	180707
P11798	Calcium/calmodulin-dependent protein kinase type II subunit alpha	Camk2a	251	17	1.452	1.46327e+08	2.0116e+08
P50580	Proliferation-associated protein 2G4	Pa2g4	10	5	1.452	206543	299800
Q80XN0	D-beta-hydroxybutyrate dehydrogenase, mitochondrial	Bdh1	92	13	1.451	1.66951e+07	2.37624e+07
P10922	Histone H1.0	H1-0	15	4	1.451	2.75895e+06	4.06373e+06
Q9JHI5	Isovaleryl-CoA dehydrogenase, mitochondrial	Ivd	30	8	1.451	1.17175e+06	1.81875e+06
A2ALS5	Rap1 GTPase-activating protein 1	Rap1gap	4	3	1.45	198073	287298
Q8QZT1	Acetyl-CoA acetyltransferase, mitochondrial	Acat1	98	17	1.449	1.59627e+07	2.35237e+07
Q5DQR4	Syntaxin-binding protein 5-like	Stxbp5l	9	5	1.448	255486	367842
P61982	14-3-3 protein gamma	Ywhag	95	8	1.448	2.11547e+07	3.16855e+07
Q9JLM8	Serine/threonine-protein kinase DCLK1	Dclk1	51	14	1.447	3.65581e+06	5.35607e+06
Q923T9	Calcium/calmodulin-dependent protein kinase type II subunit gamma	Camk2g	115	7	1.446	2.25829e+06	3.8742e+06
Q91VD9	NADH-ubiquinone oxidoreductase 75 kDa subunit, mitochondrial	Ndufs1	140	29	1.445	1.69364e+07	2.46155e+07
Q63844	Mitogen-activated protein kinase 3	Mapk3	20	3	1.444	644169	930079
Q9CQD1	Ras-related protein Rab-5A	Rab5a	18	3	1.444	683730	987123
Q9DCT2	NADH dehydrogenase	Ndufs3	28	7	1.443	998770	1.50727e+06
P45376	Aldo-keto reductase family 1 member B1	Akr1b1	25	8	1.442	1.47645e+06	2.09169e+06
P62918	60S ribosomal protein L8	Rpl8	20	5	1.441	990773	1.05082e+06
Q9WTP7	GTP:AMP phosphotransferase AK3, mitochondrial	Ak3	4	3	1.44	207698	299005
Q9D0K2	Succinyl-CoA:3-ketoacid coenzyme A transferase 1, mitochondrial	Oxct1	58	17	1.437	8.85428e+06	1.41316e+07
Q8VDQ8	NAD-dependent protein deacetylase sirtuin-2	Sirt2	85	18	1.437	2.49431e+07	2.85472e+07
Q9CZU6	Citrate synthase, mitochondrial	Cs	120	15	1.435	3.11428e+07	4.31611e+07
Q80X80	Phospholipid transfer protein C2CD2L	C2cd2l	10	5	1.434	496479	714203
Q9WUM3	Coronin-1B	Coro1b	15	4	1.432	693830	627747
O55023	Inositol monophosphatase 1	Impa1	24	6	1.432	3.0966e+06	4.32411e+06
Q9R0P5	Destrin	Dstn	42	10	1.431	3.27108e+06	5.59676e+06
Q7TSH8	Transmembrane protein 94	Tmem94	9	4	1.429	325280	421813
P59999	Actin-related protein 2/3 complex subunit 4	Arpc4	24	7	1.429	2.89548e+06	4.24181e+06
Q9WU78	Programmed cell death 6-interacting protein	Pdcd6ip	19	8	1.429	881000	1.17032e+06
Q62420	Endophilin-A1	Sh3gl2	69	15	1.428	5.84769e+06	8.7028e+06
Q80U63	Mitofusin-2	Mfn2	9	6	1.428	358833	313055
P61294	Ras-related protein Rab-6B	Rab6b	39	3	1.42	414703	588856
Q9Z1G3	V-type proton ATPase subunit C 1	Atp6v1c1	65	14	1.42	1.4755e+07	2.04344e+07
P48320	Glutamate decarboxylase 2	Gad2	23	7	1.419	1.18405e+06	2.10731e+06
P16125	L-lactate dehydrogenase B chain	Ldhb	112	15	1.419	7.10884e+07	1.02962e+08
Q04447	Creatine kinase B-type	Ckb	247	17	1.417	6.41126e+07	9.87294e+07
Q99LR1	Lysophosphatidylserine lipase ABHD12	Abhd12	26	8	1.412	1.26233e+06	2.00782e+06
O35295	Transcriptional activator protein Pur-beta	Purb	21	6	1.412	614078	877751
P48453	Serine/threonine-protein phosphatase 2B catalytic subunit beta isoform	Ppp3cb	87	9	1.409	3.25607e+06	5.02394e+06
Q925I1	ATPase family AAA domain-containing protein 3	Atad3	24	7	1.407	439607	676943
Q99JY9	Actin-related protein 3	Actr3	99	16	1.406	6.72188e+06	9.76674e+06
Q9CR57	60S ribosomal protein L14	Rpl14	13	4	1.406	2.2176e+06	2.56967e+06
P54071	Isocitrate dehydrogenase	Idh2	30	9	1.405	912029	1.57043e+06
Q9D2G2	Dihydrolipoyllysine-residue succinyltransferase component of 2-oxoglutarate dehydrogenase complex, mitochondrial	Dlst	36	9	1.404	5.25863e+06	7.78746e+06
Q8R3P0	Aspartoacylase	Aspa	7	5	1.402	927647	1.14062e+06
Q80UG5	Septin-9	Septin9	9	4	1.4	429608	671250
O88844	Isocitrate dehydrogenase	Idh1	30	9	1.398	2.40713e+06	5.48566e+06
O08749	Dihydrolipoyl dehydrogenase, mitochondrial	Dld	52	9	1.398	4.89874e+06	6.8461e+06
P62259	14-3-3 protein epsilon	Ywhae	186	17	1.396	6.58733e+07	9.81304e+07
Q922Q1	Mitochondrial amidoxime reducing component 2	Mtarc2	19	8	1.395	3.8668e+06	4.29381e+06
P11881	Inositol 1,4,5-trisphosphate receptor type 1	Itpr1	19	9	1.395	535616	526940
Q99MN9	Propionyl-CoA carboxylase beta chain, mitochondrial	Pccb	13	7	1.394	660799	885534
P62071	Ras-related protein R-Ras2	Rras2	21	6	1.394	1.16732e+06	1.65455e+06
P31324	cAMP-dependent protein kinase type II-beta regulatory subunit	Prkar2b	37	7	1.393	4.72692e+06	6.76021e+06
Q3ULJ0	Glycerol-3-phosphate dehydrogenase 1-like protein	Gpd1l	37	9	1.391	2.67587e+06	3.34142e+06
P21279	Guanine nucleotide-binding protein G(q) subunit alpha	Gnaq	40	4	1.39	943507	1.30695e+06
Q8C0L0	Thioredoxin-related transmembrane protein 4	Tmx4	20	5	1.389	1.6909e+06	2.19976e+06
P70202	Latexin	Lxn	13	3	1.388	2.52074e+06	3.37884e+06
Q9JHU9	Inositol-3-phosphate synthase 1	Isyna1	9	5	1.387	230103	319232
P80318	T-complex protein 1 subunit gamma	Cct3	45	17	1.385	2.77334e+06	4.47971e+06
Q91WD5	NADH dehydrogenase	Ndufs2	72	15	1.385	6.9952e+06	9.42307e+06
P05202	Aspartate aminotransferase, mitochondrial	Got2	198	24	1.382	5.77415e+07	8.03889e+07
P63037	DnaJ homolog subfamily A member 1	Dnaja1	12	5	1.382	694548	959557
Q62465	Synaptic vesicle membrane protein VAT-1 homolog	Vat1	9	3	1.381	893533	1.18927e+06
Q62188	Dihydropyrimidinase-related protein 3	Dpysl3	172	17	1.38	1.18805e+07	1.63861e+07
P61089	Ubiquitin-conjugating enzyme E2 N	Ube2n	7	3	1.377	385574	530889
O35927	Catenin delta-2	Ctnnd2	12	7	1.375	384701	511150
P62911	60S ribosomal protein L32	Rpl32	12	3	1.374	575383	858637
Q8R164	Valacyclovir hydrolase	Bphl	15	6	1.374	229783	315747
P08553	Neurofilament medium polypeptide	Nefm	104	19	1.372	1.37617e+07	1.91067e+07
P46660	Alpha-internexin	Ina	98	18	1.37	1.25866e+07	1.66582e+07
Q68FH0	Plakophilin-4	Pkp4	7	3	1.369	159158	217827
Q6R0H7	Guanine nucleotide-binding protein G(s) subunit alpha isoforms XLas	Gnas	24	8	1.368	2.6137e+06	4.02347e+06
O88935	Synapsin-1	Syn1	241	24	1.368	4.98344e+07	7.1885e+07
Q9DCX2	ATP synthase subunit d, mitochondrial	Atp5pd	30	7	1.368	3.17418e+06	4.18912e+06
Q9D8W7	OCIA domain-containing protein 2	Ociad2	18	4	1.365	1.67715e+06	2.33781e+06
P52196	Thiosulfate sulfurtransferase	Tst	22	8	1.365	853913	1.79233e+06
Q8BFR5	Elongation factor Tu, mitochondrial	Tufm	90	20	1.364	1.27334e+07	1.7029e+07
Q91VR2	ATP synthase subunit gamma, mitochondrial	Atp5f1c	47	8	1.362	1.47612e+07	1.85666e+07
P19246	Neurofilament heavy polypeptide	Nefh	33	6	1.362	501743	683350
Q61206	Platelet-activating factor acetylhydrolase IB subunit alpha2	Pafah1b2	11	3	1.361	1.88522e+06	2.51389e+06
Q9Z1J3	Cysteine desulfurase	Nfs1	14	5	1.359	435399	600893
Q61753	D-3-phosphoglycerate dehydrogenase	Phgdh	59	12	1.359	5.0457e+06	6.9426e+06
Q6NS52	Diacylglycerol kinase beta	Dgkb	9	5	1.357	188067	255249
O88712	C-terminal-binding protein 1	Ctbp1	25	8	1.356	1.26605e+06	1.99493e+06
Q9CWJ9	Bifunctional purine biosynthesis protein ATIC	Atic	12	7	1.356	605011	808307
Q9QXY6	EH domain-containing protein 3	Ehd3	5	4	1.352	416321	563053
Q00PI9	Heterogeneous nuclear ribonucleoprotein U-like protein 2	Hnrnpul2	17	8	1.352	415847	568111
P68369	Tubulin alpha-1A chain	Tuba1a	681	7	1.351	7.0662e+08	1.02058e+09
Q8BNU0	Armadillo repeat-containing protein 6	Armc6	11	4	1.349	509055	686932
Q9CZ30	Obg-like ATPase 1	Ola1	10	4	1.349	928567	1.26538e+06
Q9JL56	Glycerophosphodiester phosphodiesterase 1	Gde1	9	3	1.348	354393	477851
Q61301	Catenin alpha-2	Ctnna2	32	14	1.348	941341	1.24091e+06
Q7TQF7	Amphiphysin	Amph	20	5	1.348	840061	1.82634e+06
P62484	Abl interactor 2	Abi2	7	3	1.344	244097	328104
P63216	Guanine nucleotide-binding protein G(I)/G(S)/G(O) subunit gamma-3	Gng3	11	4	1.343	506238	679644
Q68FF6	ARF GTPase-activating protein GIT1	Git1	15	7	1.34	237103	379304
Q9D172	Glutamine amidotransferase-like class 1 domain-containing protein 3, mitochondrial	Gatd3	40	7	1.34	4.55743e+06	6.40334e+06
P62320	Small nuclear ribonucleoprotein Sm D3	Snrpd3	10	3	1.34	771487	1.02266e+06
P49722	Proteasome subunit alpha type-2	Psma2	20	8	1.339	1.08841e+06	1.50535e+06
O08539	Myc box-dependent-interacting protein 1	Bin1	39	9	1.339	1.75444e+06	2.51809e+06
Q8R1Q8	Cytoplasmic dynein 1 light intermediate chain 1	Dync1li1	20	8	1.338	1.26961e+06	1.825e+06
P80314	T-complex protein 1 subunit beta	Cct2	35	13	1.336	1.18715e+06	1.4632e+06
Q60930	Voltage-dependent anion-selective channel protein 2	Vdac2	123	12	1.335	6.87681e+07	9.0627e+07
Q9DB77	Cytochrome b-c1 complex subunit 2, mitochondrial	Uqcrc2	110	16	1.332	1.72583e+07	2.3261e+07
Q8JZN5	Complex I assembly factor ACAD9, mitochondrial	Acad9	10	5	1.331	134436	178919
P02301	Histone H3.3C	H3-5	20	4	1.329	1.82319e+07	2.44294e+07
P45952	Medium-chain specific acyl-CoA dehydrogenase, mitochondrial	Acadm	19	6	1.327	195674	259714
P19157	Glutathione S-transferase P 1	Gstp1	30	6	1.326	6.60973e+06	8.34938e+06
Q80TL0	Protein phosphatase 1E	Ppm1e	12	6	1.326	432072	713542
Q9R1P0	Proteasome subunit alpha type-4	Psma4	14	5	1.326	985920	1.28313e+06
Q9QUM9	Proteasome subunit alpha type-6	Psma6	21	6	1.325	1.58866e+06	1.86885e+06
P18872	Guanine nucleotide-binding protein G(o) subunit alpha	Gnao1	213	17	1.324	1.18408e+08	1.60665e+08
O88448	Kinesin light chain 2	Klc2	7	5	1.321	560713	767618
Q791V5	Mitochondrial carrier homolog 2	Mtch2	57	10	1.321	1.9159e+07	2.2614e+07
Q8BNJ6	Neuropilin and tolloid-like protein 2	Neto2	4	3	1.32	230146	367464
Q9DC69	NADH dehydrogenase	Ndufa9	68	12	1.319	5.34434e+06	7.5367e+06
O08553	Dihydropyrimidinase-related protein 2	Dpysl2	379	25	1.317	1.59895e+08	2.28665e+08
Q91Z53	Glyoxylate reductase/hydroxypyruvate reductase	Grhpr	21	5	1.314	798210	1.04135e+06
P68368	Tubulin alpha-4A chain	Tuba4a	560	5	1.313	8.9371e+07	1.29118e+08
Q9D6R2	Isocitrate dehydrogenase	Idh3a	102	15	1.313	2.86643e+07	3.45754e+07
Q3TC72	Fumarylacetoacetate hydrolase domain-containing protein 2A	Fahd2	7	4	1.313	235448	309081
Q61166	Microtubule-associated protein RP/EB family member 1	Mapre1	11	5	1.312	590159	760693
Q60749	KH domain-containing, RNA-binding, signal transduction-associated protein 1	Khdrbs1	6	3	1.31	374022	490065
Q8R3V5	Endophilin-B2	Sh3glb2	41	13	1.309	2.25136e+06	3.37093e+06
Q9CPR4	60S ribosomal protein L17	Rpl17	4	3	1.307	210417	275027
Q9CPV4	Glyoxalase domain-containing protein 4	Glod4	27	9	1.305	1.84007e+06	2.38222e+06
P17182	Alpha-enolase	Eno1	201	18	1.304	8.02188e+07	1.32227e+08
Q8K310	Matrin-3	Matr3	41	16	1.303	2.17384e+06	2.63687e+06
O70493	Sorting nexin-12	Snx12	17	4	1.3	574592	764021
Q3THS6	S-adenosylmethionine synthase isoform type-2	Mat2a	10	4	1.299	250151	325053
O08709	Peroxiredoxin-6	Prdx6	64	12	1.299	8.88291e+06	1.30171e+07
Q9R1Q8	Transgelin-3	Tagln3	48	11	1.297	5.73778e+06	6.57301e+06
E9Q912	Rap1 GTPase-GDP dissociation stimulator 1	Rap1gds1	77	19	1.294	9.9754e+06	1.31953e+07
Q8VHH7	Adenylate cyclase type 3	Adcy3	14	5	1.293	191444	247509
Q61656	Probable ATP-dependent RNA helicase DDX5	Ddx5	60	9	1.292	3.84741e+06	4.62429e+06
P62746	Rho-related GTP-binding protein RhoB	Rhob	52	7	1.292	8.87905e+06	1.05721e+07
Q8BTZ7	Mannose-1-phosphate guanyltransferase beta	Gmppb	10	6	1.292	516032	666468
Q99K85	Phosphoserine aminotransferase	Psat1	28	11	1.291	2.02211e+06	2.9535e+06
P63101	14-3-3 protein zeta/delta	Ywhaz	146	11	1.291	4.05802e+07	5.45465e+07
P26645	Myristoylated alanine-rich C-kinase substrate	Marcks	10	3	1.289	1.16526e+06	922010
P63163	Small nuclear ribonucleoprotein-associated protein N	Snrpn	15	4	1.288	1.13963e+06	1.30276e+06
Q8C1A5	Thimet oligopeptidase	Thop1	20	10	1.287	483876	601042
Q9ERD7	Tubulin beta-3 chain	Tubb3	698	7	1.287	5.40269e+07	7.51172e+07
P60879	Synaptosomal-associated protein 25	Snap25	31	8	1.284	1.88526e+06	2.77835e+06
P02088	Hemoglobin subunit beta-1	Hbb-b1	127	4	1.279	4.76376e+07	6.96776e+07
P18760	Cofilin-1	Cfl1	65	9	1.278	3.57397e+07	3.87665e+07
Q62167	ATP-dependent RNA helicase DDX3X	Ddx3x	20	5	1.275	365275	456178
Q8K4Z3	NAD(P)H-hydrate epimerase	Naxe	23	6	1.275	1.17192e+06	1.53326e+06
P67778	Prohibitin 1	Phb1	33	9	1.274	3.49143e+06	4.66227e+06
Q9Z2H2	Regulator of G-protein signaling 6	Rgs6	10	3	1.271	555630	706212
Q91VI7	Ribonuclease inhibitor	Rnh1	27	9	1.265	7.25728e+06	3.21629e+06
Q3UNH4	G protein-regulated inducer of neurite outgrowth 1	Gprin1	3	3	1.264	212496	268598
P63242	Eukaryotic translation initiation factor 5A-1	Eif5a	16	4	1.264	1.25035e+06	1.51721e+06
P04370	Myelin basic protein	Mbp	50	4	1.263	2.16795e+07	2.75306e+07
P35293	Ras-related protein Rab-18	Rab18	17	6	1.263	1.1331e+06	1.41204e+06
Q8VD37	SH3-containing GRB2-like protein 3-interacting protein 1	Sgip1	9	6	1.26	409487	516043
P19536	Cytochrome c oxidase subunit 5B, mitochondrial	Cox5b	36	4	1.26	3.75943e+06	4.44628e+06
Q99L13	3-hydroxyisobutyrate dehydrogenase, mitochondrial	Hibadh	5	3	1.26	807488	1.0536e+06
Q8CAY6	Acetyl-CoA acetyltransferase, cytosolic	Acat2	16	6	1.257	313317	650966
P63038	60 kDa heat shock protein, mitochondrial	Hspd1	105	23	1.257	1.42286e+07	2.10707e+07
Q8CG76	Aflatoxin B1 aldehyde reductase member 2	Akr7a2	14	5	1.256	461858	580285
P17183	Gamma-enolase	Eno2	98	13	1.255	1.02367e+07	1.25138e+07
P97441	Probable proton-coupled zinc antiporter SLC30A3	Slc30a3	7	4	1.253	592972	743251
Q8C8T7	Protein ELFN1	Elfn1	7	4	1.253	384540	481740
Q7TN29	Stromal membrane-associated protein 2	Smap2	5	3	1.252	176577	221113
Q9Z2Y3	Homer protein homolog 1	Homer1	28	12	1.249	1.94756e+06	2.47979e+06
P08249	Malate dehydrogenase, mitochondrial	Mdh2	266	18	1.244	2.23555e+08	2.86975e+08
Q61792	LIM and SH3 domain protein 1	Lasp1	11	3	1.242	538094	687051
Q5SWU9	Acetyl-CoA carboxylase 1	Acaca	137	40	1.242	1.46748e+07	1.65737e+07
Q6NZJ6	Eukaryotic translation initiation factor 4 gamma 1	Eif4g1	8	3	1.241	232594	288757
Q9QWI6	SRC kinase signaling inhibitor 1	Srcin1	12	7	1.239	298972	370542
Q7TMF3	NADH dehydrogenase	Ndufa12	18	4	1.239	1.42697e+06	1.78833e+06
O70325	Phospholipid hydroperoxide glutathione peroxidase	Gpx4	12	4	1.238	1.05615e+06	1.30787e+06
P40142	Transketolase	Tkt	33	10	1.238	1.86542e+06	2.30112e+06
Q9CWS0	N(G),N(G)-dimethylarginine dimethylaminohydrolase 1	Ddah1	34	8	1.237	3.40185e+06	4.11139e+06
Q4VAE3	Transmembrane protein 65	Tmem65	20	5	1.236	540314	668097
Q9R0Y5	Adenylate kinase isoenzyme 1	Ak1	16	6	1.236	1.72127e+06	2.09849e+06
Q9CZS1	Aldehyde dehydrogenase X, mitochondrial	Aldh1b1	18	8	1.235	1.34882e+06	1.33686e+06
Q99K48	Non-POU domain-containing octamer-binding protein	Nono	15	3	1.235	986679	1.26299e+06
Q9R0P9	Ubiquitin carboxyl-terminal hydrolase isozyme L1	Uchl1	60	9	1.234	1.54646e+07	1.93345e+07
Q8K0T0	Reticulon-1	Rtn1	37	6	1.231	9.98236e+06	1.1367e+07
Q99LX0	Parkinson disease protein 7 homolog	Park7	30	9	1.226	2.00556e+06	2.72444e+06
P60335	Poly(rC)-binding protein 1	Pcbp1	45	9	1.224	4.24041e+06	4.95986e+06
Q80TL4	PHD finger protein 24	Phf24	22	8	1.223	2.56582e+06	3.50059e+06
Q8BGQ7	Alanine--tRNA ligase, cytoplasmic	Aars1	21	6	1.22	722071	864585
P62141	Serine/threonine-protein phosphatase PP1-beta catalytic subunit	Ppp1cb	80	4	1.22	9.44969e+06	1.18145e+07
Q99LF4	RNA-splicing ligase RtcB homolog	Rtcb	11	6	1.218	348631	491040
Q3UHD9	Arf-GAP with GTPase, ANK repeat and PH domain-containing protein 2	Agap2	12	5	1.218	333333	405881
P99029	Peroxiredoxin-5, mitochondrial	Prdx5	72	11	1.213	1.85453e+07	2.17248e+07
Q8JZS0	Protein lin-7 homolog A	Lin7a	20	6	1.212	631941	798661
Q9JJY3	Sphingomyelin phosphodiesterase 3	Smpd3	13	5	1.211	913855	1.4367e+06
P34884	Macrophage migration inhibitory factor	Mif	23	3	1.207	2.82268e+06	4.01058e+06
Q8VIJ6	Splicing factor, proline- and glutamine-rich	Sfpq	28	6	1.207	2.159e+06	2.27383e+06
Q9CPY7	Cytosol aminopeptidase	Lap3	28	11	1.207	1.81577e+06	2.25192e+06
Q9WVK8	Cholesterol 24-hydroxylase	Cyp46a1	30	10	1.205	2.25103e+06	2.82091e+06
Q8K354	Carbonyl reductase	Cbr3	10	4	1.204	189616	228318
Q9QYG0	Protein NDRG2	Ndrg2	57	11	1.204	9.51903e+06	1.23452e+07
Q9EQQ9	Protein O-GlcNAcase	Oga	8	3	1.202	3.2061e+06	3.8539e+06
P60487	Chronophin	Pdxp	30	7	1.202	2.27197e+06	2.58485e+06
P08122	Collagen alpha-2(IV) chain	Col4a2	10	3	1.202	645027	752716
O09061	Proteasome subunit beta type-1	Psmb1	24	7	1.2	2.3968e+06	2.46237e+06
Q9Z2W0	Aspartyl aminopeptidase	Dnpep	17	8	1.199	1.00416e+06	1.14373e+06
O09131	Glutathione S-transferase omega-1	Gsto1	15	6	1.197	655842	745514
Q9JLZ3	Methylglutaconyl-CoA hydratase, mitochondrial	Auh	33	7	1.197	1.31839e+06	1.61504e+06
Q60676	Serine/threonine-protein phosphatase 5	Ppp5c	15	6	1.195	360558	430957
Q07076	Annexin A7	Anxa7	30	9	1.186	1.63493e+06	2.21007e+06
Q9CQ75	NADH dehydrogenase	Ndufa2	25	4	1.185	2.54385e+06	3.01434e+06
P14869	60S acidic ribosomal protein P0	Rplp0	19	7	1.177	1.72886e+06	2.05224e+06
Q8K183	Pyridoxal kinase	Pdxk	38	9	1.174	6.64989e+06	8.12766e+06
Q8BKX1	Brain-specific angiogenesis inhibitor 1-associated protein 2	Baiap2	23	10	1.171	1.83508e+06	2.34554e+06
Q6PDY2	2-aminoethanethiol dioxygenase	Ado	10	3	1.17	579220	680022
P35486	Pyruvate dehydrogenase E1 component subunit alpha, somatic form, mitochondrial	Pdha1	174	20	1.168	2.97624e+07	3.81464e+07
Q9CQ92	Mitochondrial fission 1 protein	Fis1	8	4	1.168	280641	327684
Q8VBT0	Thioredoxin-related transmembrane protein 1	Tmx1	4	3	1.165	226134	263509
Q9Z0P4	Paralemmin-1	Palm	14	3	1.165	207080	241192
Q99L04	Dehydrogenase/reductase SDR family member 1	Dhrs1	16	7	1.164	118280	137715
P12658	Calbindin	Calb1	13	4	1.164	630890	734092
Q8K2T1	NmrA-like family domain-containing protein 1	Nmral1	7	4	1.163	155157	180514
P03995	Glial fibrillary acidic protein	Gfap	48	6	1.161	2.07002e+07	2.38297e+07
Q8CHP8	Glycerol-3-phosphate phosphatase	Pgp	21	6	1.16	1.14404e+06	1.44777e+06
O70252	Heme oxygenase 2	Hmox2	39	8	1.159	2.49271e+06	2.94438e+06
P15532	Nucleoside diphosphate kinase A	Nme1	71	5	1.159	2.94755e+07	4.99008e+07
Q80TE7	Leucine-rich repeat-containing protein 7	Lrrc7	30	9	1.157	1.13053e+06	1.2693e+06
P00493	Hypoxanthine-guanine phosphoribosyltransferase	Hprt1	35	7	1.157	3.71577e+06	4.63054e+06
Q9QYJ0	DnaJ homolog subfamily A member 2	Dnaja2	14	4	1.155	282596	391125
Q9QZB7	Actin-related protein 10	Actr10	9	5	1.155	561722	632470
Q8CGK7	Guanine nucleotide-binding protein G(olf) subunit alpha	Gnal	16	5	1.153	1.13027e+06	1.35616e+06
P62761	Visinin-like protein 1	Vsnl1	120	14	1.152	2.4394e+07	2.72788e+07
P38060	Hydroxymethylglutaryl-CoA lyase, mitochondrial	Hmgcl	13	4	1.149	195450	224494
Q9R257	Heme-binding protein 1	Hebp1	9	3	1.148	1.22508e+06	1.63456e+06
A2ASZ8	Calcium-binding mitochondrial carrier protein SCaMC-2	Slc25a25	13	4	1.145	133321	152703
Q80YA9	Connector enhancer of kinase suppressor of ras 2	Cnksr2	5	3	1.143	382381	437156
O35226	26S proteasome non-ATPase regulatory subunit 4	Psmd4	10	3	1.143	315121	360165
P62137	Serine/threonine-protein phosphatase PP1-alpha catalytic subunit	Ppp1ca	73	3	1.141	4.16627e+06	4.41528e+06
Q9CZ42	ATP-dependent (S)-NAD(P)H-hydrate dehydratase	Naxd	19	7	1.139	552726	674075
P20152	Vimentin	Vim	32	10	1.137	1.47693e+06	1.42452e+06
Q61171	Peroxiredoxin-2	Prdx2	69	11	1.136	2.99899e+07	3.4408e+07
Q9ES97	Reticulon-3	Rtn3	45	8	1.134	1.81245e+07	2.01285e+07
P84075	Neuron-specific calcium-binding protein hippocalcin	Hpca	42	3	1.134	7.8849e+06	8.6517e+06
P70349	Adenosine 5'-monophosphoramidase HINT1	Hint1	9	4	1.133	1.16367e+06	1.34803e+06
Q6NVG1	Lysophospholipid acyltransferase LPCAT4	Lpcat4	13	7	1.128	234179	264238
Q9CWZ7	Gamma-soluble NSF attachment protein	Napg	47	9	1.125	7.54534e+06	8.24458e+06
O35465	Peptidyl-prolyl cis-trans isomerase FKBP8	Fkbp8	18	6	1.125	355784	429306
O08585	Clathrin light chain A	Clta	14	4	1.122	360267	423538
Q9JM52	Misshapen-like kinase 1	Mink1	13	3	1.12	458136	513092
Q8R016	Bleomycin hydrolase	Blmh	13	4	1.118	796761	890898
Q61644	Protein kinase C and casein kinase substrate in neurons protein 1	Pacsin1	26	10	1.117	4.01286e+06	5.2584e+06
P56391	Cytochrome c oxidase subunit 6B1	Cox6b1	14	3	1.116	324699	499227
Q7TQD2	Tubulin polymerization-promoting protein	Tppp	12	4	1.114	1.13008e+06	1.25901e+06
Q9DCW4	Electron transfer flavoprotein subunit beta	Etfb	34	10	1.111	2.3032e+06	2.60343e+06
Q91ZA3	Propionyl-CoA carboxylase alpha chain, mitochondrial	Pcca	817	46	1.11	5.29155e+08	6.19696e+08
P05201	Aspartate aminotransferase, cytoplasmic	Got1	136	23	1.107	2.72968e+07	3.32647e+07
Q8R5H6	Actin-binding protein WASF1	Wasf1	15	7	1.107	221740	245422
Q9WTL7	Acyl-protein thioesterase 2	Lypla2	12	3	1.105	1.38176e+06	1.50324e+06
P17751	Triosephosphate isomerase	Tpi1	153	14	1.103	5.05919e+07	6.38078e+07
Q00493	Carboxypeptidase E	Cpe	12	6	1.103	1.14235e+06	549777
Q80UU9	Membrane-associated progesterone receptor component 2	Pgrmc2	12	3	1.096	754141	823581
Q9D898	Actin-related protein 2/3 complex subunit 5-like protein	Arpc5l	6	3	1.096	793229	869131
Q60631	Growth factor receptor-bound protein 2	Grb2	11	5	1.095	481744	521963
Q60668	Heterogeneous nuclear ribonucleoprotein D0	Hnrnpd	17	4	1.088	3.21433e+06	3.63989e+06
Q9DB20	ATP synthase subunit O, mitochondrial	Atp5po	74	8	1.087	1.92956e+07	2.11806e+07
Q9WTX5	S-phase kinase-associated protein 1	Skp1	6	3	1.086	637364	692175
Q3THK7	GMP synthase	Gmps	11	6	1.085	458089	497180
Q9ERI6	Retinol dehydrogenase 14	Rdh14	9	3	1.083	952268	1.05562e+06
O70435	Proteasome subunit alpha type-3	Psma3	14	6	1.076	1.25448e+06	1.24136e+06
Q9Z1P6	NADH dehydrogenase	Ndufa7	8	3	1.067	605584	646318
P63323	40S ribosomal protein S12	Rps12	6	4	1.065	867238	883611
Q8BKZ9	Pyruvate dehydrogenase protein X component, mitochondrial	Pdhx	18	5	1.063	1.36964e+06	1.28299e+06
P47708	Rabphilin-3A	Rph3a	15	4	1.059	715372	737387
P46097	Synaptotagmin-2	Syt2	55	3	1.058	218987	231776
Q8CHT0	Delta-1-pyrroline-5-carboxylate dehydrogenase, mitochondrial	Aldh4a1	6	3	1.053	208795	219941
Q7TMK9	Heterogeneous nuclear ribonucleoprotein Q	Syncrip	22	7	1.05	877144	916735
O88569	Heterogeneous nuclear ribonucleoproteins A2/B1	Hnrnpa2b1	48	10	1.049	2.65561e+06	3.86416e+06
Q3V1U8	ELMO domain-containing protein 1	Elmod1	9	4	1.04	524199	545383
P49312	Heterogeneous nuclear ribonucleoprotein A1	Hnrnpa1	42	8	1.04	1.59934e+06	1.35641e+06
P63328	Protein phosphatase 3 catalytic subunit alpha	Ppp3ca	115	10	1.031	6.76194e+07	7.44744e+07
Q60854	Serpin B6	Serpinb6	6	3	1.029	515799	530603
Q9CZC8	Secernin-1	Scrn1	77	14	1.025	1.10696e+07	1.17329e+07
Q99JY0	Trifunctional enzyme subunit beta, mitochondrial	Hadhb	17	9	1.012	389661	602018
Q05920	Pyruvate carboxylase, mitochondrial	Pc	1223	61	1.003	1.86975e+09	1.71293e+09
Q9EPW0	Inositol polyphosphate-4-phosphatase type I A	Inpp4a	11	6	0.999	371493	364858
O88737	Protein bassoon	Bsn	14	8	0.996	859181	707900
Q6NXK8	Acid-sensing ion channel 1	Asic1	7	4	0.991	449297	452959
Q9CQX2	Cytochrome b5 type B	Cyb5b	19	4	0.988	1.44543e+06	1.94825e+06
Q9D1A2	Cytosolic non-specific dipeptidase	Cndp2	7	3	0.982	303190	297799
Q99KB8	Hydroxyacylglutathione hydrolase, mitochondrial	Hagh	10	3	0.979	221981	205424
Q9CPU0	Lactoylglutathione lyase	Glo1	10	3	0.978	742444	729373
Q3U0V1	Far upstream element-binding protein 2	Khsrp	12	5	0.974	129370	126067
O89112	Glutathione S-transferase LANCL1	Lancl1	26	8	0.969	2.22399e+06	2.08826e+06
P09671	Superoxide dismutase	Sod2	28	6	0.954	4.90797e+06	5.16256e+06
P20108	Thioredoxin-dependent peroxide reductase, mitochondrial	Prdx3	47	8	0.938	1.33716e+07	1.28968e+07
Q8BG05	Heterogeneous nuclear ribonucleoprotein A3	Hnrnpa3	65	13	0.937	1.06348e+07	1.01845e+07
Q9CX56	26S proteasome non-ATPase regulatory subunit 8	Psmd8	6	3	0.925	333523	308505
O88545	COP9 signalosome complex subunit 6	Cops6	10	4	0.919	223824	205644
P61979	Heterogeneous nuclear ribonucleoprotein K	Hnrnpk	52	12	0.911	6.06846e+06	5.59876e+06
Q60996	Serine/threonine-protein phosphatase 2A 56 kDa regulatory subunit gamma isoform	Ppp2r5c	11	4	0.905	99130	89682.6
Q501J6	Probable ATP-dependent RNA helicase DDX17	Ddx17	36	4	0.902	530207	540905
Q8VCM7	Fibrinogen gamma chain	Fgg	19	5	0.893	1.71213e+06	1.68152e+06
O54865	Guanylate cyclase soluble subunit beta-1	Gucy1b1	5	5	0.862	159191	137283
Q8C0Z1	Protein FAM234A	Fam234a	7	5	0.839	84774.9	71104.1
Q9QYA2	Mitochondrial import receptor subunit TOM40 homolog	Tomm40	8	3	0.825	363577	300014
P53810	Phosphatidylinositol transfer protein alpha isoform	Pitpna	11	5	0.815	764181	1.11926e+06
Q9Z0Y1	Dynactin subunit 3	Dctn3	6	4	0.777	771690	691761
Q9D0S9	Adenosine 5'-monophosphoramidase HINT2	Hint2	9	3	0.773	284629	220129
O55234	Proteasome subunit beta type-5	Psmb5	6	3	0.76	258776	196658
Q63810	Calcineurin subunit B type 1	Ppp3r1	20	5	0.75	1.81318e+06	1.39498e+06
Q60605	Myosin light polypeptide 6	Myl6	17	5	0.744	824101	705476
P70408	Cadherin-10	Cdh10	14	4	0.734	90090.5	66123
Q9WUR9	Adenylate kinase 4, mitochondrial	Ak4	16	3	0.719	335479	241110
A2ARS0	Ankyrin repeat domain-containing protein 63	Ankrd63	8	3	0.623	257242	160293
Q8BMK4	Cytoskeleton-associated protein 4	Ckap4	23	9	0.589	571850	336706
Q01065	Dual specificity calcium/calmodulin-dependent 3',5'-cyclic nucleotide phosphodiesterase 1B	Pde1b	20	7	0.586	729615	570489
Q5SRX1	TOM1-like protein 2	Tom1l2	11	5	0.527	728594	409192
Q6PHU5	Sortilin	Sort1	12	5	0.461	349118	311074
Q9D880	Mitochondrial import inner membrane translocase subunit TIM50	Timm50	11	4	0.451	596570	256401
P60469	Liprin-alpha-3	Ppfia3	31	11	0.286	269444	77028.1
Q6P069	Sorcin	Sri	6	3	0.219	730564	310559
O35593	26S proteasome non-ATPase regulatory subunit 14	Psmd14	13	3	0.179	255526	45736.1
