# Supplementary material for: Optochemical profiling of receptor-proximal proteins in vivo in minutes
Source: Research Square preprint supplement (doi:10.21203/rs.3.rs-3418321/v1), 2023-11-14
Supplement: Supplementary file 2 [file 57026eb6a852945c87908933.xlsx]

## Sheet: Legend
Supplementary Table 2
Proteomics data for PhoxID targeting AMPAR-proximal proteins in the cerebellum (integrated data from n=3 biological replicates x 2 technical replicates)
Sheet name	Description
S2-1	Cerebellum, hit proteins only
S2-2	Cerebellum, all detected proteins

## Sheet: S2-1. Cerebellum, hits
UniProt ID	Protein	Gene	# PSMs	# unique peptides	Median fold change: PhoxID with compound 1 vs. 2	Fold change p-value	Abundances (Grouped): Compound 2, Bio. Rep. 1	Abundances (Grouped): Compound 2, Bio. Rep. 2	Abundances (Grouped): Compound 2, Bio. Rep. 3	Abundances (Grouped): Compound 1, Bio. Rep. 1	Abundances (Grouped): Compound 1, Bio. Rep. 2	Abundances (Grouped): Compound 1, Bio. Rep. 3	Reference for interactions with GRIA1–4 (related to Fig. 1f)
Q9Z2W8	Glutamate receptor 4	Gria4	54	9	13.142	0.0239402	492704	371045	370830	4.87619e+06	7.42824e+06	1.90939e+06	STRING 11.5
P63056	Noelin-3	Olfm3	5	3	12.693	0.0470319	85484.8	93344.4	110977	1.18483e+06	1.73369e+06	320554	STRING 11.5
P23819	Glutamate receptor 2	Gria2	14	5	11.995	0.00637484	127079	133335	71990.5	1.52428e+06	2.2104e+06	693235	STRING 11.5
Q9Z2W9	Glutamate receptor 3	Gria3	72	12	11.393	0.029858	662345	646098	650359	7.40924e+06	1.08578e+07	2.86419e+06	STRING 11.5
P26883	Peptidyl-prolyl cis-trans isomerase FKBP1A	Fkbp1a	5	1	6.525	0.0104971	36918.2	23099.8	10491.6	327054	132847	150727	STRING 11.5
Q9R069	Basal cell adhesion molecule	Bcam	1	1	6.509	0.0305893	42250.2	13294.2	59701.8	275022	318747	122398	STRING 11.5
Q99K10	Neuroligin-1	Nlgn1	1	1	5.194	0.0493159	23702.9	27853.4	20052.9	123110	250281	61059.9	STRING 11.5
Q61361	Brevican core protein	Bcan	16	2	4.797	0.0200461	639114	304188	313586	1.50413e+06	1.58403e+06	897445	Ref [35]
Q62443	Neuronal pentraxin-1	Nptx1	9	4	4.497	0.0523615	129288	162063	164617	728813	1.45328e+06	370491	Xu et al. Neuron. 2003;39(3):513-28.
Q61625	Glutamate receptor ionotropic, delta-2	Grid2	60	12	4.222	0.0908223	1.05518e+06	1.14123e+06	880174	4.45541e+06	7.91416e+06	1.708e+06	STRING 11.5
P10493	Nidogen-1	Nid1	45	12	3.845	0.00953674	903542	877557	744037	2.10954e+06	3.50622e+06	3.37393e+06	STRING 11.5
Q9JHG0	Cerebellin-3	Cbln3	13	3	3.301	0.0436055	257359	207187	202969	683883	885320	384166	STRING 11.5
Q9R1V7	Disintegrin and metalloproteinase domain-containing protein 23	Adam23	8	3	3.206	0.0612774	101654	103625	81224.9	325892	534408	172595	STRING 11.5

## Sheet: S2-2. Cerebellum, all
UniProt ID	Protein	Gene	# PSMs	# unique peptides	Median fold change: PhoxID with compound 1 vs. 2	Fold change p-value	Abundances (Grouped): Compound 2, Bio. Rep. 1	Abundances (Grouped): Compound 2, Bio. Rep. 2	Abundances (Grouped): Compound 2, Bio. Rep. 3	Abundances (Grouped): Compound 1, Bio. Rep. 1	Abundances (Grouped): Compound 1, Bio. Rep. 2	Abundances (Grouped): Compound 1, Bio. Rep. 3
Q9Z2W8	Glutamate receptor 4	Gria4	54	9	13.142	0.0239402	492704	371045	370830	4.87619e+06	7.42824e+06	1.90939e+06
P63056	Noelin-3	Olfm3	5	3	12.693	0.0470319	85484.8	93344.4	110977	1.18483e+06	1.73369e+06	320554
Q9JKD3	Secretory carrier-associated membrane protein 5	Scamp5	1	1	12.155	0.123397	155989	12373.8	18642.8	309182	226594	199981
P23819	Glutamate receptor 2	Gria2	14	5	11.995	0.00637484	127079	133335	71990.5	1.52428e+06	2.2104e+06	693235
Q9Z2W9	Glutamate receptor 3	Gria3	72	12	11.393	0.029858	662345	646098	650359	7.40924e+06	1.08578e+07	2.86419e+06
Q91YT0	NADH dehydrogenase	Ndufv1	4	1	7.132	0.117032	112365	24075.1	25267.1	180198	185906	85001.3
P26883	Peptidyl-prolyl cis-trans isomerase FKBP1A	Fkbp1a	5	1	6.525	0.0104971	36918.2	23099.8	10491.6	327054	132847	150727
Q9R069	Basal cell adhesion molecule	Bcam	1	1	6.509	0.0305893	42250.2	13294.2	59701.8	275022	318747	122398
Q05793	Basement membrane-specific heparan sulfate proteoglycan core protein	Hspg2	36	10	5.626	0.197821	468451	376734	491659	412974	2.73328e+06	2.6354e+06
Q99K10	Neuroligin-1	Nlgn1	1	1	5.194	0.0493159	23702.9	27853.4	20052.9	123110	250281	61059.9
Q61361	Brevican core protein	Bcan	16	2	4.797	0.0200461	639114	304188	313586	1.50413e+06	1.58403e+06	897445
Q62443	Neuronal pentraxin-1	Nptx1	9	4	4.497	0.0523615	129288	162063	164617	728813	1.45328e+06	370491
Q9CWF2	Tubulin beta-2B chain	Tubb2b	740	2	4.33	0.240566	179890	26295.9	766331	697242	838335	778932
P35803	Neuronal membrane glycoprotein M6-b	Gpm6b	6	1	4.295	0.104654	321519	117053	79099.7	502752	508317	324144
Q61625	Glutamate receptor ionotropic, delta-2	Grid2	60	12	4.222	0.0908223	1.05518e+06	1.14123e+06	880174	4.45541e+06	7.91416e+06	1.708e+06
Q60749	KH domain-containing, RNA-binding, signal transduction-associated protein 1	Khdrbs1	2	1	3.907	0.188077	84649.8	8990.14	20999.9	82051	43821	223066
P10493	Nidogen-1	Nid1	45	12	3.845	0.00953674	903542	877557	744037	2.10954e+06	3.50622e+06	3.37393e+06
P08730	Keratin, type I cytoskeletal 13	Krt13	296	1	3.701	0.726176	20666	442023	27592.2	102128	35920	250084
P57722	Poly(rC)-binding protein 3	Pcbp3	37	2	3.697	0.41659	124554	46009.5	38919.9	170115	33793.1	348836
Q9R0P3	S-formylglutathione hydrolase	Esd	6	1	3.582	0.183289	109668	29391.4	28629	105274	131351	90727.7
P61255	60S ribosomal protein L26	Rpl26	4	1	3.41	0.161249	21689.2	67500.7	18084.4	73961.2	78825.1	65634
Q9JHG0	Cerebellin-3	Cbln3	13	3	3.301	0.0436055	257359	207187	202969	683883	885320	384166
Q9D2P8	Myelin-associated oligodendrocyte basic protein	Mobp	27	3	3.27	0.202505	377070	372756	997370	584634	1.34489e+06	1.23311e+06
Q9R1V7	Disintegrin and metalloproteinase domain-containing protein 23	Adam23	8	3	3.206	0.0612774	101654	103625	81224.9	325892	534408	172595
P63163	Small nuclear ribonucleoprotein-associated protein N	Snrpn	9	2	3.167	0.0994367	218742	118247	139948	443198	197930	627242
O88507	Ciliary neurotrophic factor receptor subunit alpha	Cntfr	11	2	3.083	0.123092	117128	91598.2	96396.7	297210	425022	125503
Q6PHS9	Voltage-dependent calcium channel subunit alpha-2/delta-2	Cacna2d2	7	3	3.075	0.188202	68214.6	119340	89330.1	274688	764595	100836
G5E8G2	Ubiquitin carboxyl-terminal hydrolase 17-like protein D	Usp17ld	1	1	3.026	0.393248	771502	162494	60584.9	491630	524951	324847
Q9JIA1	Leucine-rich glioma-inactivated protein 1	Lgi1	3	1	2.881	0.0967468	95598.2	94652.6	84867	308759	272705	121036
Q810U4	Neuronal cell adhesion molecule	Nrcam	21	6	2.794	0.103405	409223	375001	314014	1.04785e+06	2.63962e+06	615137
P48771	Cytochrome c oxidase subunit 7A2, mitochondrial	Cox7a2	5	1	2.783	0.0858717	85161.4	149384	74009	237007	250225	127019
Q99N28	Cell adhesion molecule 3	Cadm3	48	4	2.756	0.124109	761326	635453	549519	1.75117e+06	2.21939e+06	757264
P63082	V-type proton ATPase 16 kDa proteolipid subunit c	Atp6v0c	4	1	2.747	0.374024	123581	17932.1	43841.6	44292.6	120452	139038
Q61330	Contactin-2	Cntn2	11	5	2.745	0.153938	178821	215182	141870	490820	1.21968e+06	224738
Q99PJ0	Neurotrimin	Ntm	14	3	2.728	0.146772	284758	269806	231126	735955	1.13869e+06	303605
Q8K386	Ras-related protein Rab-15	Rab15	28	1	2.658	0.122228	961389	437655	332779	1.33146e+06	952849	1.16343e+06
P01831	Thy-1 membrane glycoprotein	Thy1	20	2	2.644	0.158945	414068	437995	404341	1.09474e+06	1.54221e+06	461371
Q71M36	Chondroitin sulfate proteoglycan 5	Cspg5	2	1	2.588	0.552384	27577.7	34066.9	44627.2	15504.9	88178.9	119809
P62317	Small nuclear ribonucleoprotein Sm D2	Snrpd2	2	1	2.533	0.071808	55462.2	41915.7	44550.4	112837	63345.1	139714
P17897	Lysozyme C-1	Lyz1	19	1	2.522	0.0273516	409484	544988	315768	1.10923e+06	1.03255e+06	648374
Q9DB72	BTB/POZ domain-containing protein 17	Btbd17	7	1	2.492	0.101527	147609	145361	93629.9	362265	722497	183979
Q8R2Y2	Cell surface glycoprotein MUC18	Mcam	1	1	2.398	0.377958	33610.2	29466.3	23337.4	70653	147458	17856.7
Q9R171	Cerebellin-1	Cbln1	29	3	2.377	0.0389331	821747	999239	587587	1.95297e+06	2.26804e+06	1.16744e+06
Q8R001	Microtubule-associated protein RP/EB family member 2	Mapre2	3	1	2.287	0.693652	81474.3	47547.8	25922.7	15740.1	108736	167088
P16390	Potassium voltage-gated channel subfamily A member 3	Kcna3	3	1	2.285	0.0486227	81082.9	76713.5	47403.9	175322	211025	97809
Q9CPW0	Contactin-associated protein-like 2	Cntnap2	18	6	2.193	0.0603231	240486	254272	126426	527305	1.65469e+06	470305
P02463	Collagen alpha-1(IV) chain	Col4a1	4	1	2.174	0.53981	41615.1	48719.9	37237.5	20299.4	159269	90481.5
P62281	40S ribosomal protein S11	Rps11	1	1	2.135	0.483799	88489.2	31285.4	29823.7	34611.6	66780.3	110741
Q8C854	Myelin expression factor 2	Myef2	6	2	2.124	0.351986	107942	52121.5	57557.3	122253	55522.4	185723
Q80XN0	D-beta-hydroxybutyrate dehydrogenase, mitochondrial	Bdh1	16	4	2.111	0.110807	181062	110302	68652.7	232827	282755	173633
P56959	RNA-binding protein FUS	Fus	18	4	2.101	0.344208	1.00538e+06	291475	407390	856079	430615	3.33292e+06
P97300	Neuroplastin	Nptn	31	3	2.095	0.0831759	677125	683899	660779	1.41854e+06	1.44334e+06	839647
Q80WM4	Hyaluronan and proteoglycan link protein 4	Hapln4	3	1	2.089	0.0927381	29678.5	36279.7	20335.9	61984.5	141814	43937.3
Q9CR95	Adaptin ear-binding coat-associated protein 1	Necap1	1	1	2.063	0.102788	32765.3	48632.6	32329.9	67580.5	124865	50210.3
Q60668	Heterogeneous nuclear ribonucleoprotein D0	Hnrnpd	25	3	2.051	0.140121	847775	534963	666993	1.36793e+06	857262	2.92447e+06
Q91V41	Ras-related protein Rab-14	Rab14	15	3	2.049	0.115024	385391	393149	353780	796354	789532	429793
P14231	Sodium/potassium-transporting ATPase subunit beta-2	Atp1b2	99	5	2.033	0.16273	4.72577e+06	4.95126e+06	3.51931e+06	9.60709e+06	1.2097e+07	4.52515e+06
Q9EST1	Gasdermin-A	Gsdma	9	1	2.02	0.385046	67635.5	125412	266623	116373	344876	253280
P04919	Band 3 anion transport protein	Slc4a1	2	1	2.019	0.179643	17592.9	23847	31635.2	27050.6	48145.4	108466
Q64444	Carbonic anhydrase 4	Ca4	6	3	2.017	0.102362	182620	183602	196291	412865	370270	221597
P26369	Splicing factor U2AF 65 kDa subunit	U2af2	5	1	2.016	0.357061	118298	35062.4	74755.4	150691	49846.7	335246
P11627	Neural cell adhesion molecule L1	L1cam	2	1	2.012	0.24144	46959.9	67408.5	44002.9	94504.5	299916	55621.4
P62320	Small nuclear ribonucleoprotein Sm D3	Snrpd3	6	1	2.012	0.158246	126281	81035.5	113749	250350	108420	228882
Q9Z218	Dipeptidyl aminopeptidase-like protein 6	Dpp6	8	3	2.011	0.0474201	106374	144943	137943	277384	394776	193328
Q9CQD1	Ras-related protein Rab-5A	Rab5a	13	1	2.007	0.239762	66730.7	101540	18579.8	133913	134755	84998.7
Q9QUP5	Hyaluronan and proteoglycan link protein 1	Hapln1	6	1	1.99	0.178585	165814	157822	117658	314028	593592	159037
P10852	4F2 cell-surface antigen heavy chain	Slc3a2	26	7	1.983	0.166832	523167	457656	508554	1.00848e+06	1.83364e+06	566624
P70202	Latexin	Lxn	47	4	1.952	0.0367976	3.08867e+06	3.388e+06	2.63796e+06	8.92973e+06	6.03015e+06	4.87278e+06
O35737	Heterogeneous nuclear ribonucleoprotein H	Hnrnph1	32	5	1.949	0.310313	1.31834e+06	551264	675389	1.31657e+06	718498	3.06399e+06
Q8CJH3	Plexin-B1	Plxnb1	1	1	1.948	0.135066	16950.8	22409.6	25316	28323.7	97619	43652.2
P08551	Neurofilament light polypeptide	Nefl	140	11	1.942	0.0290746	2.65322e+06	3.61921e+06	2.66665e+06	5.17893e+06	5.20711e+06	3.88918e+06
Q8R464	Cell adhesion molecule 4	Cadm4	51	8	1.93	0.233411	787980	745815	496010	1.43935e+06	2.6521e+06	620982
P20108	Thioredoxin-dependent peroxide reductase, mitochondrial	Prdx3	45	5	1.926	0.103536	1.9005e+06	2.39677e+06	2.0108e+06	4.07343e+06	3.87373e+06	2.34666e+06
P51881	ADP/ATP translocase 2	Slc25a5	260	5	1.91	0.0138663	3.54617e+06	2.59977e+06	2.50617e+06	6.1e+06	4.96504e+06	4.68085e+06
P62897	Cytochrome c, somatic	Cycs	14	1	1.909	0.0749917	952313	949230	946550	1.81191e+06	1.82017e+06	1.17193e+06
Q5M8N0	CB1 cannabinoid receptor-interacting protein 1	Cnrip1	6	1	1.908	0.0584925	83190.9	90903.1	67831.3	158689	251056	120155
Q02357	Ankyrin-1	Ank1	2	1	1.897	0.370102	62529.1	21285.4	12732.1	24349.2	40379.4	157808
P46097	Synaptotagmin-2	Syt2	26	2	1.89	0.0130364	352251	294233	271470	555971	572569	427519
Q62425	Cytochrome c oxidase subunit NDUFA4	Ndufa4	16	2	1.858	0.0297059	860451	836712	716093	1.55469e+06	1.59658e+06	1.09082e+06
P07724	Albumin	Alb	142	18	1.858	0.050018	6.08276e+06	5.00716e+06	6.18824e+06	1.46098e+07	8.01651e+06	1.13018e+07
P02468	Laminin subunit gamma-1	Lamc1	6	3	1.854	0.247649	113694	115800	109297	125506	823449	210821
P35438	Glutamate receptor ionotropic, NMDA 1	Grin1	2	1	1.847	0.967001	26548.1	80069.9	354713	147872	457122	9279.38
P35762	CD81 antigen	Cd81	5	1	1.846	0.93607	151866	65649	49188.1	18641.6	177237	121179
Q61171	Peroxiredoxin-2	Prdx2	156	12	1.846	0.00915329	1.47678e+07	1.82291e+07	1.50709e+07	2.93491e+07	2.78178e+07	2.25687e+07
P61027	Ras-related protein Rab-10	Rab10	31	3	1.845	0.00890061	659081	605197	464424	1.11654e+06	1.2815e+06	1.04156e+06
P28571	Sodium- and chloride-dependent glycine transporter 1	Slc6a9	19	4	1.839	0.0570368	311643	213035	168583	391785	593628	339236
Q9CQ69	Cytochrome b-c1 complex subunit 8	Uqcrq	9	1	1.824	0.136932	163363	74495	209549	297918	369772	196253
Q99K48	Non-POU domain-containing octamer-binding protein	Nono	40	6	1.82	0.264412	1.43056e+06	532664	731498	1.33122e+06	868272	3.05952e+06
Q9JLF6	Protein-glutamine gamma-glutamyltransferase K	Tgm1	1	1	1.818	0.413555	11060.3	37270.8	25071.6	14754.3	90549.8	45589
Q9DCX2	ATP synthase subunit d, mitochondrial	Atp5pd	17	3	1.815	0.305197	580948	349615	277970	699799	634535	363913
Q8BLK3	Limbic system-associated membrane protein	Lsamp	10	2	1.815	0.244512	211418	292478	236634	429440	875140	239067
Q9CX86	Heterogeneous nuclear ribonucleoprotein A0	Hnrnpa0	42	4	1.815	0.235364	1.48088e+06	1.03103e+06	1.12902e+06	2.04882e+06	1.11831e+06	2.49439e+06
O35136	Neural cell adhesion molecule 2	Ncam2	3	3	1.814	0.270616	282277	247807	180890	449494	873346	207435
Q68EF4	Metabotropic glutamate receptor 4	Grm4	3	2	1.798	0.214248	53577.3	60875.9	70297.8	109482	313100	70705.7
Q9CWH6	Proteasome subunit alpha type-8	Psma8	6	1	1.79	0.27912	58576.6	81663.7	172622	146156	176406	129852
O08709	Peroxiredoxin-6	Prdx6	63	10	1.78	0.304717	1.29568e+06	1.20961e+06	1.14821e+06	2.16107e+06	2.15312e+06	1.0429e+06
Q9D6M3	Mitochondrial glutamate carrier 1	Slc25a22	29	3	1.775	0.0344027	682319	870932	643716	1.31108e+06	1.21091e+06	923414
P17751	Triosephosphate isomerase	Tpi1	83	11	1.752	0.563447	9.68611e+06	3.1439e+06	2.84462e+06	7.00733e+06	5.50707e+06	5.08269e+06
Q8BGN3	Glycerophosphocholine cholinephosphodiesterase ENPP6	Enpp6	16	3	1.746	0.898473	451581	157190	150183	274458	343715	136140
B2RPV6	Multimerin-1	Mmrn1	2	1	1.716	0.237133	23507.9	21223.8	24044.7	27389.9	40333.5	163222
P60202	Myelin proteolipid protein	Plp1	147	7	1.715	0.0859941	3.68376e+07	4.23078e+07	3.21954e+07	6.31597e+07	6.69529e+07	4.18307e+07
Q9D0M5	Dynein light chain 2, cytoplasmic	Dynll2	13	2	1.714	0.199591	525698	402878	171386	799185	690339	431346
Q60932	Voltage-dependent anion-selective channel protein 1	Vdac1	124	12	1.712	0.129785	8.48904e+06	1.11312e+07	9.46591e+06	1.62401e+07	1.62097e+07	1.01527e+07
P97370	Sodium/potassium-transporting ATPase subunit beta-3	Atp1b3	12	2	1.71	0.166392	282977	247374	141529	422975	574273	232544
P97772	Metabotropic glutamate receptor 1	Grm1	9	2	1.707	0.152725	168040	202635	133786	201902	576717	286848
Q9DC70	NADH dehydrogenase	Ndufs7	5	1	1.707	0.205872	175736	106289	25491.6	331421	181064	181395
Q5DTL9	Sodium-driven chloride bicarbonate exchanger	Slc4a10	1	1	1.704	0.0703339	37132.8	56366.4	40056.2	68253.8	92842.3	56039.3
Q99104	Unconventional myosin-Va	Myo5a	5	1	1.699	0.0587622	49405.4	46740.3	30538.9	79406.3	111548	57158.7
P51150	Ras-related protein Rab-7a	Rab7a	13	2	1.699	0.176563	112980	280394	296038	484199	476349	268045
Q8BK64	Activator of 90 kDa heat shock protein ATPase homolog 1	Ahsa1	5	2	1.686	0.284569	128988	135519	106443	217488	232332	107176
Q8R366	Immunoglobulin superfamily member 8	Igsf8	40	5	1.686	0.0891006	485175	450525	354942	759560	1.09176e+06	534286
Q61885	Myelin-oligodendrocyte glycoprotein	Mog	34	3	1.679	0.184783	1.35307e+06	1.30411e+06	726563	2.18919e+06	2.41769e+06	1.11488e+06
Q06185	ATP synthase subunit e, mitochondrial	Atp5me	9	2	1.678	0.24028	222382	249270	230873	387321	641385	226888
Q921F2	TAR DNA-binding protein 43	Tardbp	35	6	1.673	0.546178	1.84044e+06	1.47691e+06	1.59148e+06	2.66295e+06	1.12567e+06	2.71621e+06
P39054	Dynamin-2	Dnm2	54	1	1.668	0.333818	74897.7	89708.3	64005.7	62290.3	124933	175539
Q8VEK3	Heterogeneous nuclear ribonucleoprotein U	Hnrnpu	25	6	1.652	0.169114	786374	915041	727762	835231	1.29927e+06	1.67414e+06
P56480	ATP synthase subunit beta, mitochondrial	Atp5f1b	113	13	1.646	0.140763	5.00637e+06	4.41113e+06	4.26162e+06	7.45381e+06	7.2606e+06	4.73504e+06
O88569	Heterogeneous nuclear ribonucleoproteins A2/B1	Hnrnpa2b1	36	8	1.645	0.169217	2.49961e+06	2.09192e+06	2.26257e+06	3.72161e+06	2.67306e+06	7.06696e+06
Q9D0E1	Heterogeneous nuclear ribonucleoprotein M	Hnrnpm	40	10	1.643	0.312417	1.66352e+06	596817	1.03256e+06	1.69698e+06	942828	3.10007e+06
Q62266	Cornifin-A	Sprr1a	2	1	1.64	0.229425	36587.4	57915	35414.7	43917.8	99965.4	60018.7
Q60900	ELAV-like protein 3	Elavl3	16	3	1.616	0.00291981	239556	285528	255105	412350	397583	478742
Q9R0Q6	Actin-related protein 2/3 complex subunit 1A	Arpc1a	8	1	1.614	0.220406	170922	208220	183792	320971	296592	178383
Q9Z130	Heterogeneous nuclear ribonucleoprotein D-like	Hnrnpdl	22	1	1.606	0.13957	414240	313824	401065	643918	430792	1.01283e+06
P47754	F-actin-capping protein subunit alpha-2	Capza2	21	3	1.604	0.100664	345197	401143	347420	557398	673413	411782
O88322	Nidogen-2	Nid2	6	3	1.601	0.139598	927919	1.01029e+06	1.01337e+06	3.23299e+06	1.61746e+06	1.29323e+06
O88342	WD repeat-containing protein 1	Wdr1	43	5	1.599	0.0529672	1.04389e+06	1.34645e+06	1.14156e+06	1.82569e+06	2.15983e+06	1.42514e+06
P63001	Ras-related C3 botulinum toxin substrate 1	Rac1	54	5	1.599	0.0218406	2.28821e+06	2.69524e+06	2.36782e+06	3.78605e+06	4.14094e+06	3.11819e+06
Q8K406	Leucine-rich repeat LGI family member 3	Lgi3	2	2	1.579	0.121206	52824.4	56880.1	36970.2	73103.5	212316	83406.6
P19783	Cytochrome c oxidase subunit 4 isoform 1, mitochondrial	Cox4i1	24	3	1.578	0.187242	327966	326860	324128	579223	515766	326868
O70133	ATP-dependent RNA helicase A	Dhx9	7	2	1.576	0.600601	70904.3	78200.2	66520.9	48495.4	111743	115260
Q9DC69	NADH dehydrogenase	Ndufa9	17	5	1.575	0.326106	218994	332567	235056	370325	467769	230230
P62827	GTP-binding nuclear protein Ran	Ran	72	7	1.574	0.00952062	1.8584e+06	1.70294e+06	1.41574e+06	3.15857e+06	2.67964e+06	2.45528e+06
P20152	Vimentin	Vim	54	6	1.573	0.117166	629915	689191	578534	684780	991067	1.11316e+06
Q01853	Transitional endoplasmic reticulum ATPase	Vcp	7	5	1.566	0.193291	522645	760120	702489	643212	1.22975e+06	1.09976e+06
Q8R191	Synaptogyrin-3	Syngr3	8	1	1.557	0.571794	50836.2	219710	189112	73044.9	342473	294429
Q8BGT8	Phytanoyl-CoA hydroxylase-interacting protein-like	Phyhipl	16	1	1.551	0.127877	410659	459942	423577	657028	718390	459631
P68040	Receptor of activated protein C kinase 1	Rack1	11	3	1.546	0.0952815	314173	184071	222401	410280	330293	343786
Q9CPU4	Microsomal glutathione S-transferase 3	Mgst3	5	3	1.543	0.00634206	233650	203986	195814	314819	321037	281502
Q9JKP5	Muscleblind-like protein 1	Mbnl1	16	1	1.542	0.0768448	4.59124e+09	5.31438e+09	4.95279e+09	1.06715e+10	7.63964e+09	6.34228e+09
Q9CQR4	Acyl-coenzyme A thioesterase 13	Acot13	15	1	1.54	0.352645	278280	329693	271006	428552	529543	247745
B9EKR1	Receptor-type tyrosine-protein phosphatase zeta	Ptprz1	8	2	1.54	0.255069	202380	351818	306854	293023	1.44961e+06	472548
A2ASQ1	Agrin	Agrn	3	3	1.54	0.30074	57705.7	73928.3	38965.6	54234.9	362534	88843.5
Q8VEH3	ADP-ribosylation factor-like protein 8A	Arl8a	10	1	1.54	0.260182	110877	158559	104581	266129	170699	120008
O54991	Contactin-associated protein 1	Cntnap1	10	3	1.536	0.27462	221584	221290	225356	223856	864374	340341
O08749	Dihydrolipoyl dehydrogenase, mitochondrial	Dld	71	7	1.53	0.0907487	1.35168e+06	1.2765e+06	1.47605e+06	3.83442e+06	2.06833e+06	2.05214e+06
Q99LX0	Parkinson disease protein 7 homolog	Park7	8	1	1.521	0.23132	89280.9	116568	96658.6	147019	212615	98278.8
P47791	Glutathione reductase, mitochondrial	Gsr	4	1	1.519	0.00364174	115433	98438	102905	169905	145645	156292
Q9R1P4	Proteasome subunit alpha type-1	Psma1	4	1	1.518	0.0966184	101227	148890	203374	211301	341251	226060
Q6NXK7	Inactive dipeptidyl peptidase 10	Dpp10	4	1	1.516	0.326071	55104.5	48761.8	49973.9	48822.9	295985	75775.6
P62835	Ras-related protein Rap-1A	Rap1a	24	5	1.515	0.0591123	608258	792196	710665	1.15072e+06	1.07682e+06	810802
P62812	Gamma-aminobutyric acid receptor subunit alpha-1	Gabra1	2	1	1.514	0.0495019	266828	271190	241540	404016	522766	344745
Q9R1Q8	Transgelin-3	Tagln3	12	3	1.51	0.127853	457649	455567	543960	559138	691007	1.00534e+06
P16330	2',3'-cyclic-nucleotide 3'-phosphodiesterase	Cnp	317	27	1.508	0.0595085	2.00016e+07	2.21983e+07	1.89483e+07	3.2142e+07	3.01601e+07	2.3329e+07
P08556	GTPase NRas	Nras	4	1	1.503	0.270127	300291	247096	311574	451486	561883	257958
P16858	Glyceraldehyde-3-phosphate dehydrogenase	Gapdh	322	18	1.503	0.110066	3.90761e+07	3.57011e+07	3.25042e+07	5.36538e+07	6.27971e+07	3.91875e+07
Q8CHH9	Septin-8	Septin8	44	3	1.5	0.0396802	1.85805e+06	1.68076e+06	1.61237e+06	2.83584e+06	2.52055e+06	2.08073e+06
Q64521	Glycerol-3-phosphate dehydrogenase, mitochondrial	Gpd2	4	1	1.499	0.238785	50731.8	66997.4	54567.7	81797.3	132227	56850.6
P68372	Tubulin beta-4B chain	Tubb4b	730	1	1.497	0.118882	6.16333e+06	7.36587e+06	5.94318e+06	9.2281e+06	1.16406e+07	7.11803e+06
P29341	Polyadenylate-binding protein 1	Pabpc1	1	1	1.496	0.187584	85721.5	87550.2	111173	106121	131015	235158
Q9R1S8	Calpain-7	Capn7	7	1	1.491	0.12056	341625	398117	333490	509297	724996	413642
Q61990	Poly(rC)-binding protein 2	Pcbp2	52	2	1.489	0.119176	650247	522485	680061	968097	772586	1.65541e+06
P26043	Radixin	Rdx	6	2	1.488	0.053516	253164	221730	195151	286078	444036	329865
Q8C0E2	Vacuolar protein sorting-associated protein 26B	Vps26b	6	2	1.48	0.0238628	230400	276621	309535	409463	453436	355548
P48962	ADP/ATP translocase 1	Slc25a4	308	10	1.478	0.0140037	3.73099e+07	3.95048e+07	3.65793e+07	5.51475e+07	5.61856e+07	4.74012e+07
P60766	Cell division control protein 42 homolog	Cdc42	36	5	1.477	0.0853646	782222	771015	777402	1.14844e+06	1.36511e+06	913179
Q60930	Voltage-dependent anion-selective channel protein 2	Vdac2	85	8	1.476	0.043715	8.24812e+06	8.81776e+06	8.41782e+06	1.7267e+07	1.23688e+07	1.24211e+07
P63011	Ras-related protein Rab-3A	Rab3a	76	4	1.474	0.0366934	5.40617e+06	6.06008e+06	5.81295e+06	8.68973e+06	8.56695e+06	6.83196e+06
Q91V12	Cytosolic acyl coenzyme A thioester hydrolase	Acot7	65	8	1.459	0.00419557	1.88805e+06	1.77523e+06	2.00481e+06	3.1009e+06	2.61556e+06	2.75444e+06
P12960	Contactin-1	Cntn1	166	24	1.457	0.154707	6.64306e+06	6.07764e+06	4.81e+06	8.85444e+06	1.86097e+07	7.34675e+06
Q61292	Laminin subunit beta-2	Lamb2	34	16	1.457	0.211365	643598	675694	468169	789305	3.59993e+06	937625
Q91V61	Sideroflexin-3	Sfxn3	13	2	1.457	0.11667	273583	323862	296251	431506	489915	319756
P63054	Calmodulin regulator protein PCP4	Pcp4	2	1	1.454	0.263663	32076.9	35583.2	13973.8	46649.7	27734.3	228680
P17809	Solute carrier family 2, facilitated glucose transporter member 1	Slc2a1	19	2	1.452	0.00948737	352560	431495	390207	608000	566643	513152
P31648	Sodium- and chloride-dependent GABA transporter 1	Slc6a1	14	2	1.45	0.0587801	551895	572539	469159	800108	930805	628016
P62754	40S ribosomal protein S6	Rps6	3	1	1.447	0.0717483	138598	86684.6	146851	200582	232440	181459
Q8VCM7	Fibrinogen gamma chain	Fgg	319	23	1.446	0.405304	1.82653e+07	4.63137e+06	2.32442e+07	2.64165e+07	7.90409e+06	2.73603e+08
Q02257	Junction plakoglobin	Jup	150	16	1.445	0.404215	1.84232e+06	6.61467e+06	4.81178e+06	3.26091e+06	1.13173e+07	6.95313e+06
P43006	Excitatory amino acid transporter 2	Slc1a2	78	9	1.441	0.105675	4.94797e+06	4.44995e+06	4.37747e+06	6.41313e+06	9.16676e+06	5.53427e+06
Q8BG39	Synaptic vesicle glycoprotein 2B	Sv2b	5	2	1.437	0.346035	75912.9	88802	8992.53	51478.7	170381	109099
Q61792	LIM and SH3 domain protein 1	Lasp1	29	3	1.433	0.000757945	458538	452806	492602	657121	686044	646523
Q8C1B7	Septin-11	Septin11	46	3	1.432	0.11565	206062	170392	148787	243967	246490	188610
Q62059	Versican core protein	Vcan	1	1	1.43	0.172896	59300.3	54617.8	67997.3	84793.4	211744	82312.8
P62908	40S ribosomal protein S3	Rps3	11	2	1.426	0.183537	93775.4	153765	185267	220265	219207	180899
Q9Z2H5	Band 4.1-like protein 1	Epb41l1	9	3	1.423	0.364059	66070.1	82327.3	72136.6	62803.9	102658	123729
A2BDX3	Adenylyltransferase and sulfurtransferase MOCS3	Mocs3	6	1	1.422	0.247718	144795	145600	137748	134845	205960	210771
P14152	Malate dehydrogenase, cytoplasmic	Mdh1	81	8	1.419	0.40257	5.13219e+06	4.17172e+06	4.26833e+06	6.0574e+06	6.17028e+06	3.93486e+06
Q9D1R9	60S ribosomal protein L34	Rpl34	3	1	1.418	0.0179107	112281	88267.8	106518	161396	132378	151059
P14094	Sodium/potassium-transporting ATPase subunit beta-1	Atp1b1	121	11	1.417	0.197803	1.08479e+07	1.20732e+07	1.03519e+07	1.53708e+07	1.94847e+07	1.11547e+07
Q99PT1	Rho GDP-dissociation inhibitor 1	Arhgdia	34	3	1.409	0.17286	786753	857851	982348	1.50837e+06	1.2085e+06	897416
Q5F226	Protocadherin Fat 2	Fat2	2	2	1.405	0.240836	47515.5	41054.5	37904.6	50264.1	170904	57690.7
P14602	Heat shock protein beta-1	Hspb1	1	1	1.401	0.298793	43554.1	79897.3	68469.8	95944.8	139158	56733.6
Q99JG2	G-protein coupled receptor 37-like 1	Gpr37l1	17	2	1.396	0.00928188	194976	228068	212431	319183	296460	266969
P47757	F-actin-capping protein subunit beta	Capzb	18	2	1.395	0.20812	445086	620711	430067	620686	861238	521673
P97447	Four and a half LIM domains protein 1	Fhl1	7	1	1.394	0.83723	96108.2	102271	132633	174156	65197.2	142517
P59999	Actin-related protein 2/3 complex subunit 4	Arpc4	5	2	1.393	0.114559	182576	171684	191745	254358	401139	229063
P28651	Carbonic anhydrase-related protein	Ca8	82	7	1.392	0.142603	2.78653e+06	3.22633e+06	2.37628e+06	3.88019e+06	4.50755e+06	2.92057e+06
Q9D023	Mitochondrial pyruvate carrier 2	Mpc2	9	2	1.392	0.147408	356596	435064	416344	579428	599842	410677
P06151	L-lactate dehydrogenase A chain	Ldha	63	8	1.391	0.394611	3.89872e+06	2.49331e+06	2.45554e+06	3.46748e+06	4.3414e+06	2.79651e+06
Q6GSS7	Histone H2A type 2-A	Hist2h2aa1	114	2	1.39	0.178955	1.36494e+06	1.06187e+06	668703	1.70948e+06	1.47643e+06	1.31808e+06
Q9JIS5	Synaptic vesicle glycoprotein 2A	Sv2a	40	7	1.388	0.171181	691737	888282	680621	813670	1.38025e+06	960336
P63318	Protein kinase C gamma type	Prkcg	76	8	1.387	0.108019	1.45949e+06	1.84088e+06	1.50175e+06	2.08368e+06	2.80404e+06	1.82641e+06
P62874	Guanine nucleotide-binding protein G(I)/G(S)/G(T) subunit beta-1	Gnb1	67	5	1.384	0.0758532	3.1124e+06	2.99723e+06	2.83628e+06	4.1491e+06	4.49548e+06	3.33137e+06
Q7TMM9	Tubulin beta-2A chain	Tubb2a	755	2	1.384	0.136141	4.41458e+07	5.0518e+07	4.58441e+07	6.34595e+07	8.06217e+07	5.07638e+07
O88343	Electrogenic sodium bicarbonate cotransporter 1	Slc4a4	63	7	1.383	0.117053	2.008e+06	2.15871e+06	1.93492e+06	2.77786e+06	4.29374e+06	2.51848e+06
Q80SW1	S-adenosylhomocysteine hydrolase-like protein 1	Ahcyl1	36	6	1.383	0.478809	993975	1.06847e+06	797966	737538	1.52562e+06	1.37489e+06
P62137	Serine/threonine-protein phosphatase PP1-alpha catalytic subunit	Ppp1ca	3	2	1.379	0.242287	112307	117709	116212	253012	160214	115734
Q9D8N0	Elongation factor 1-gamma	Eef1g	15	4	1.374	0.23171	390309	534158	447427	614932	715819	442215
P15532	Nucleoside diphosphate kinase A	Nme1	41	3	1.372	0.179003	801785	843086	1.09338e+06	1.51295e+06	1.15648e+06	956732
P56135	ATP synthase subunit f, mitochondrial	Atp5mf	8	1	1.371	0.432324	238895	283246	281350	385827	450203	213678
P35278	Ras-related protein Rab-5C	Rab5c	11	1	1.371	0.0598383	156778	224965	216056	296130	312366	267811
Q9R0Q7	Prostaglandin E synthase 3	Ptges3	4	1	1.37	0.821047	26567.1	16853.5	90187.5	42285	17198.4	36390.3
Q9D2G2	Dihydrolipoyllysine-residue succinyltransferase component of 2-oxoglutarate dehydrogenase complex, mitochondrial	Dlst	15	1	1.369	0.36047	309291	381007	337257	461775	495078	301741
Q8VEM8	Phosphate carrier protein, mitochondrial	Slc25a3	64	6	1.369	0.134757	2.4616e+06	2.53967e+06	2.03963e+06	3.36994e+06	5.14316e+06	2.71233e+06
Q61553	Fascin	Fscn1	16	2	1.369	0.0178777	220762	261195	244807	319205	406389	335057
P49722	Proteasome subunit alpha type-2	Psma2	8	1	1.368	0.751673	46648.3	50198.6	102706	68657.3	89183.7	53147.8
P27600	Guanine nucleotide-binding protein subunit alpha-12	Gna12	23	1	1.364	0.189747	1.18391e+06	1.24955e+06	1.28301e+06	1.70501e+06	2.47617e+06	1.31355e+06
Q810U3	Neurofascin	Nfasc	81	14	1.364	0.224964	1.6074e+06	1.50122e+06	1.07198e+06	2.04804e+06	6.32168e+06	1.66507e+06
Q8C0M9	Isoaspartyl peptidase/L-asparaginase	Asrgl1	26	6	1.364	0.0836861	560559	482012	566505	1.23836e+06	735226	764730
Q3TXX4	Vesicular glutamate transporter 1	Slc17a7	32	4	1.363	0.463634	1.26405e+07	4.1394e+07	3.20257e+07	1.86849e+07	7.84697e+07	4.36657e+07
P62631	Elongation factor 1-alpha 2	Eef1a2	170	6	1.362	0.0351475	1.42304e+07	1.44155e+07	1.4916e+07	1.96369e+07	2.09356e+07	1.71714e+07
P17182	Alpha-enolase	Eno1	109	12	1.36	0.577745	1.34305e+07	9.60238e+06	9.08289e+06	1.30589e+07	1.36821e+07	9.06578e+06
Q6PHN9	Ras-related protein Rab-35	Rab35	3	2	1.358	0.048957	878372	1.03145e+06	1.01832e+06	1.75364e+06	1.38301e+06	1.2195e+06
Q9WV92	Band 4.1-like protein 3	Epb41l3	41	9	1.357	0.260306	759186	742204	642521	668224	1.02728e+06	1.00698e+06
Q9WUM5	Succinate--CoA ligase	Suclg1	41	5	1.355	0.0586792	484704	637619	649109	874071	864046	696580
Q8C2Q3	RNA-binding protein 14	Rbm14	8	3	1.354	0.533711	260374	81233.9	109403	148183	106660	472328
P08228	Superoxide dismutase	Sod1	28	4	1.352	0.169089	781846	858899	1.10187e+06	1.22568e+06	1.16116e+06	982341
Q8K596	Sodium/calcium exchanger 2	Slc8a2	2	2	1.349	0.202618	32174.1	33884.8	25168.5	30310.8	57427.8	43415.7
Q9R0P5	Destrin	Dstn	6	1	1.349	0.405264	132587	182085	140636	189682	192040	139129
P09671	Superoxide dismutase	Sod2	10	4	1.349	0.26608	566305	535298	743397	1.10826e+06	605000	763715
Q6ZWX6	Eukaryotic translation initiation factor 2 subunit 1	Eif2s1	2	1	1.342	0.743333	36686	35373.7	35008.1	23963.6	52788.7	47472.2
P99024	Tubulin beta-5 chain	Tubb5	719	5	1.339	0.281405	7.04283e+06	7.94689e+06	7.30533e+06	9.78188e+06	1.25641e+07	6.98429e+06
P00493	Hypoxanthine-guanine phosphoribosyltransferase	Hprt1	13	3	1.336	0.151673	384631	338530	476244	855625	470779	513762
G3X9C2	F-box only protein 50	Nccrp1	7	1	1.335	0.559018	24487.1	59228.4	67583.3	28204.2	125266	79098.8
P68368	Tubulin alpha-4A chain	Tuba4a	421	5	1.333	0.0787011	4.18794e+06	3.1192e+06	3.48426e+06	4.64278e+06	5.06191e+06	4.15513e+06
P61205	ADP-ribosylation factor 3	Arf3	61	3	1.331	0.105246	1.82835e+06	1.87059e+06	1.98311e+06	2.56346e+06	2.49013e+06	1.99815e+06
Q64332	Synapsin-2	Syn2	45	9	1.322	0.260493	1.93422e+06	1.94635e+06	1.88876e+06	2.55648e+06	4.43952e+06	1.94328e+06
Q03265	ATP synthase subunit alpha, mitochondrial	Atp5f1a	304	28	1.321	0.210875	2.31521e+07	2.71948e+07	2.50358e+07	3.30755e+07	4.786e+07	2.59064e+07
P35279	Ras-related protein Rab-6A	Rab6a	14	2	1.321	0.517059	354623	455002	440855	663125	582202	317065
P62806	Histone H4	H4c1	105	8	1.317	0.221764	1.64198e+07	1.61077e+07	1.78451e+07	2.42151e+07	2.16288e+07	1.64017e+07
Q9DBJ1	Phosphoglycerate mutase 1	Pgam1	34	8	1.312	0.2679	2.24882e+06	1.81718e+06	1.88586e+06	2.47402e+06	2.75566e+06	1.89576e+06
P15105	Glutamine synthetase	Glul	102	10	1.312	0.277985	4.10416e+06	4.5604e+06	4.38982e+06	5.75885e+06	6.3989e+06	4.06923e+06
P10630	Eukaryotic initiation factor 4A-II	Eif4a2	32	4	1.31	0.339931	551373	749564	629027	823718	1.23182e+06	580239
Q9R0P9	Ubiquitin carboxyl-terminal hydrolase isozyme L1	Uchl1	30	6	1.307	0.460978	696140	951589	791550	1.03482e+06	1.54394e+06	652822
Q9CPU0	Lactoylglutathione lyase	Glo1	24	2	1.306	0.206591	585584	487720	560255	1.05749e+06	731886	560351
Q9EQF6	Dihydropyrimidinase-related protein 5	Dpysl5	4	1	1.301	0.995203	64389.6	110671	80326.9	40251.2	137140	104528
P05201	Aspartate aminotransferase, cytoplasmic	Got1	146	17	1.301	0.0256057	6.31443e+06	6.04673e+06	6.50643e+06	9.60626e+06	7.89348e+06	8.21597e+06
P02088	Hemoglobin subunit beta-1	Hbb-b1	93	4	1.298	0.290435	8.54619e+06	3.852e+06	7.93111e+06	1.02945e+07	6.37764e+06	1.37257e+07
Q91VR2	ATP synthase subunit gamma, mitochondrial	Atp5f1c	18	3	1.298	0.41661	393550	490423	382450	510751	759396	365699
Q9Z1N5	Spliceosome RNA helicase Ddx39b	Ddx39b	32	5	1.297	0.0276153	610166	604742	699338	791514	865060	737048
Q8BRV5	Uncharacterized protein KIAA1671	Kiaa1671	3	1	1.293	0.499107	5.83654e+06	3.95767e+06	3.82417e+06	5.11853e+06	5.84786e+06	4.26805e+06
Q9JKC6	Cell cycle exit and neuronal differentiation protein 1	Cend1	3	1	1.293	0.256231	36062.9	46847.9	13416.4	46612.1	70137.1	41157.7
P60335	Poly(rC)-binding protein 1	Pcbp1	70	5	1.29	0.114599	1.97368e+06	1.27273e+06	1.94618e+06	2.37424e+06	2.51066e+06	5.06373e+06
P99029	Peroxiredoxin-5, mitochondrial	Prdx5	31	5	1.29	0.414579	812945	724552	801414	1.03355e+06	1.23585e+06	657584
P03921	NADH-ubiquinone oxidoreductase chain 5	Mtnd5	5	2	1.288	0.0556697	220891	251281	241368	274260	362091	310816
P62743	AP-2 complex subunit sigma	Ap2s1	15	1	1.287	0.114321	233879	283126	282443	363637	380070	279398
P35486	Pyruvate dehydrogenase E1 component subunit alpha, somatic form, mitochondrial	Pdha1	221	21	1.287	0.243887	1.03891e+07	1.01569e+07	9.08052e+06	1.3724e+07	1.30734e+07	9.43241e+06
P16125	L-lactate dehydrogenase B chain	Ldhb	100	12	1.287	0.240207	1.46491e+07	1.57687e+07	1.43977e+07	1.88551e+07	2.23365e+07	1.45535e+07
Q8CCK0	Core histone macro-H2A.2	Macroh2a2	7	2	1.279	0.166719	225656	142018	281506	264805	431146	288707
P35802	Neuronal membrane glycoprotein M6-a	Gpm6a	34	3	1.278	0.476098	1.32156e+06	897976	1.14166e+06	1.61447e+06	1.45896e+06	933474
Q61598	Rab GDP dissociation inhibitor beta	Gdi2	58	4	1.278	0.159799	527388	582489	556310	710886	1.0307e+06	621039
Q8K4Z5	Splicing factor 3A subunit 1	Sf3a1	4	2	1.278	0.701826	60272.7	80590.1	56260.8	49512.7	94535.6	77009.5
P60879	Synaptosomal-associated protein 25	Snap25	4	2	1.275	0.868147	81360.5	89599.5	73925.1	126225	32334.1	103763
Q8CCT4	Transcription elongation factor A protein-like 5	Tceal5	8	2	1.275	0.395549	74076.7	73267.3	80468.3	104926	67585.1	94459.4
Q99JY0	Trifunctional enzyme subunit beta, mitochondrial	Hadhb	3	1	1.275	0.258279	119553	190575	156858	199940	273574	153561
P35293	Ras-related protein Rab-18	Rab18	7	1	1.273	0.0144974	90703.1	106239	107188	150400	135233	126852
P70349	Adenosine 5'-monophosphoramidase HINT1	Hint1	11	1	1.272	0.85603	150398	171340	142016	191251	283732	84223.3
P68369	Tubulin alpha-1A chain	Tuba1a	459	6	1.272	0.0770209	3.96878e+07	4.16001e+07	4.39351e+07	5.2899e+07	5.43425e+07	4.44691e+07
P53994	Ras-related protein Rab-2A	Rab2a	20	2	1.271	0.961074	386997	573526	407279	702653	517848	234843
P84099	60S ribosomal protein L19	Rpl19	2	1	1.271	0.688169	100846	89810.8	105571	27156.6	128126	132517
P31786	Acyl-CoA-binding protein	Dbi	9	1	1.267	0.719448	87854.7	83225.6	87379.6	169560	110716	52183.7
P97350	Plakophilin-1	Pkp1	12	2	1.266	0.719066	66199.5	364920	257050	79805	599019	325464
P08249	Malate dehydrogenase, mitochondrial	Mdh2	220	16	1.265	0.114301	1.20669e+07	1.17246e+07	1.09499e+07	1.80501e+07	1.48298e+07	1.26996e+07
Q61206	Platelet-activating factor acetylhydrolase IB subunit alpha2	Pafah1b2	6	2	1.263	0.806922	202158	156110	156543	197707	209788	135410
Q91V14	Solute carrier family 12 member 5	Slc12a5	49	7	1.263	0.251057	1.21055e+06	1.09496e+06	1.0002e+06	1.11485e+06	2.14969e+06	1.38245e+06
O35098	Dihydropyrimidinase-related protein 4	Dpysl4	22	5	1.262	0.223263	213738	303448	332720	283655	382994	505375
Q9CZM2	60S ribosomal protein L15	Rpl15	8	1	1.259	0.863313	189807	251527	211770	83781.3	349461	266572
P10922	Histone H1.0	H1-0	3	2	1.258	0.720732	170576	356114	326456	36944.7	410795	463482
Q8BMF4	Dihydrolipoyllysine-residue acetyltransferase component of pyruvate dehydrogenase complex, mitochondrial	Dlat	54	6	1.256	0.40904	1.57893e+06	1.6353e+06	1.53772e+06	1.98348e+06	2.00044e+06	1.42072e+06
P61922	4-aminobutyrate aminotransferase, mitochondrial	Abat	19	4	1.256	0.372816	640002	471834	521752	655413	836450	495369
Q9Z1S5	Neuronal-specific septin-3	Septin3	11	2	1.252	0.330597	380088	376255	366328	470888	577847	343365
P28652	Calcium/calmodulin-dependent protein kinase type II subunit beta	Camk2b	46	7	1.245	0.163893	2.17039e+06	2.01143e+06	2.39917e+06	2.38205e+06	2.70238e+06	3.73331e+06
P84091	AP-2 complex subunit mu	Ap2m1	25	5	1.244	0.018696	908612	948912	933907	1.13887e+06	1.30134e+06	1.16187e+06
P56564	Excitatory amino acid transporter 1	Slc1a3	160	7	1.238	0.109122	1.33337e+07	1.3237e+07	1.44e+07	1.65068e+07	1.82739e+07	1.43915e+07
Q8K4Z3	NAD(P)H-hydrate epimerase	Naxe	3	1	1.238	0.320393	267334	475668	403598	614894	499537	364593
P18872	Guanine nucleotide-binding protein G(o) subunit alpha	Gnao1	107	10	1.237	0.188533	4.94171e+06	5.32176e+06	5.31651e+06	6.57477e+06	7.7854e+06	5.26584e+06
P39053	Dynamin-1	Dnm1	184	20	1.236	0.348991	6.82392e+06	9.05948e+06	7.78932e+06	7.22571e+06	1.35458e+07	9.62612e+06
P11276	Fibronectin	Fn1	120	38	1.235	0.416054	1.50039e+06	1.8177e+06	1.9104e+06	1.40934e+06	2.24415e+06	2.13194e+07
P40142	Transketolase	Tkt	68	11	1.234	0.310208	1.96632e+06	1.77273e+06	2.27571e+06	2.92956e+06	1.89138e+06	2.42628e+06
Q8K310	Matrin-3	Matr3	54	12	1.232	0.513169	2.0283e+06	724025	1.00846e+06	1.24197e+06	1.01736e+06	3.19733e+06
P40124	Adenylyl cyclase-associated protein 1	Cap1	11	2	1.231	0.129771	84689.6	85094.8	93623.8	104731	131081	95645.8
P63101	14-3-3 protein zeta/delta	Ywhaz	99	7	1.23	0.499063	6.23229e+06	6.978e+06	7.25576e+06	8.58548e+06	9.40276e+06	5.71803e+06
Q8VIJ6	Splicing factor, proline- and glutamine-rich	Sfpq	67	9	1.228	0.36783	3.24924e+06	1.152e+06	1.91725e+06	2.35414e+06	1.97392e+06	8.37581e+06
Q9CVB6	Actin-related protein 2/3 complex subunit 2	Arpc2	9	2	1.228	0.647651	192005	258748	219628	287042	269654	181414
P62880	Guanine nucleotide-binding protein G(I)/G(S)/G(T) subunit beta-2	Gnb2	47	2	1.227	0.340484	301064	325833	461457	399710	583144	365034
Q8VHN7	Adhesion G-protein coupled receptor V1	Adgrv1	3	1	1.226	0.579529	411833	1.6645e+06	4.08158e+06	36261.9	2.24408e+06	2.04141e+06
P13707	Glycerol-3-phosphate dehydrogenase	Gpd1	19	4	1.222	0.712404	687754	630730	613173	770445	996381	462531
Q9ERD7	Tubulin beta-3 chain	Tubb3	523	8	1.221	0.171097	1.98182e+06	1.98546e+06	1.51087e+06	2.42063e+06	3.62537e+06	1.98272e+06
P55088	Aquaporin-4	Aqp4	13	2	1.22	0.0626295	696450	724353	764303	784524	883810	942527
Q9CXW4	60S ribosomal protein L11	Rpl11	4	1	1.22	0.166417	164853	142671	196989	201067	215173	190097
P67778	Prohibitin 1	Phb1	6	1	1.22	0.698756	94028.7	104828	83796.4	114683	148160	66921
Q62277	Synaptophysin	Syp	15	1	1.219	0.318167	1.23052e+06	1.43456e+06	1.47901e+06	1.74804e+06	2.28263e+06	1.27369e+06
P52480	Pyruvate kinase PKM	Pkm	189	24	1.218	0.361681	1.01514e+07	9.31318e+06	9.55666e+06	1.16389e+07	1.53511e+07	8.84736e+06
Q501J6	Probable ATP-dependent RNA helicase DDX17	Ddx17	61	2	1.216	0.257492	139590	57537.3	95459.1	113524	116098	225837
Q9R1P0	Proteasome subunit alpha type-4	Psma4	6	1	1.215	0.435589	91129	104951	159412	127469	172515	118490
Q8BGH2	Sorting and assembly machinery component 50 homolog	Samm50	4	1	1.214	0.328122	104697	134103	134715	260062	162850	113046
P63328	Protein phosphatase 3 catalytic subunit alpha	Ppp3ca	9	3	1.209	0.278377	376765	392254	480627	474364	484218	431724
Q8K183	Pyridoxal kinase	Pdxk	16	2	1.208	0.365984	505692	654763	573927	864402	693139	528706
Q99JP6	Homer protein homolog 3	Homer3	4	1	1.205	0.17697	94130.8	104548	67854.7	102785	113465	123814
Q3U0V1	Far upstream element-binding protein 2	Khsrp	1	1	1.204	0.716854	53326.7	36331	35505.4	31184.7	43742.5	69194.2
P35979	60S ribosomal protein L12	Rpl12	11	2	1.204	0.0703349	363385	365040	338676	437391	548626	422303
Q8BW86	Rho guanine nucleotide exchange factor 33	Arhgef33	6	2	1.203	0.907729	118743	103389	115510	76873	138979	143925
P20029	Endoplasmic reticulum chaperone BiP	Hspa5	35	6	1.203	0.414121	400793	447316	510916	538083	612460	409279
P62702	40S ribosomal protein S4, X isoform	Rps4x	2	1	1.199	0.560048	41332.8	38979.3	52205.6	35513.9	77839.5	49543.1
P60867	40S ribosomal protein S20	Rps20	18	2	1.198	0.31436	165679	139587	156812	187896	224584	144049
Q9WV02	RNA-binding motif protein, X chromosome	Rbmx	5	2	1.197	0.31669	42711.7	53629.3	16390.6	34650.9	51120.5	170045
Q91XV3	Brain acid soluble protein 1	Basp1	6	1	1.195	0.400205	58370.2	62308.2	75814.4	64571	74906.7	74429.4
P42932	T-complex protein 1 subunit theta	Cct8	1	1	1.194	0.334625	81349.1	61473.2	68700.9	82011.2	138629	67954.5
P43274	Histone H1.4	H1-4	66	2	1.192	0.454644	1.79604e+06	3.31611e+06	3.72249e+06	2.50779e+06	3.95116e+06	4.62326e+06
P48758	Carbonyl reductase	Cbr1	10	1	1.188	0.500575	63650.5	149436	137151	162994	176151	95715.8
Q9DB20	ATP synthase subunit O, mitochondrial	Atp5po	18	4	1.188	0.348028	1.03185e+06	796428	933747	1.30257e+06	1.10923e+06	852865
Q3UMR5	Calcium uniporter protein, mitochondrial	Mcu	14	3	1.187	0.226249	155138	183087	131190	167125	287733	184200
P97427	Dihydropyrimidinase-related protein 1	Crmp1	116	6	1.186	0.155983	1.11714e+06	1.63534e+06	1.47147e+06	1.74525e+06	2.11602e+06	1.56288e+06
Q9CR68	Cytochrome b-c1 complex subunit Rieske, mitochondrial	Uqcrfs1	24	3	1.185	0.22082	546182	559562	586847	849773	662818	576338
Q60931	Voltage-dependent anion-selective channel protein 3	Vdac3	86	7	1.183	0.0455628	6.02679e+06	7.01519e+06	7.05711e+06	1.05838e+07	8.30233e+06	8.28936e+06
P43277	Histone H1.3	H1-3	58	1	1.182	0.585558	185876	386353	466235	264452	456494	517063
Q791V5	Mitochondrial carrier homolog 2	Mtch2	34	5	1.181	0.232133	837874	1.09668e+06	1.01952e+06	1.2042e+06	1.66516e+06	996903
Q8BG05	Heterogeneous nuclear ribonucleoprotein A3	Hnrnpa3	66	12	1.176	0.438113	2.7469e+06	1.01399e+06	2.11547e+06	2.48846e+06	1.41185e+06	8.18076e+06
P18760	Cofilin-1	Cfl1	33	6	1.173	0.249165	1.58931e+06	1.4567e+06	1.51551e+06	2.78962e+06	1.77759e+06	1.6019e+06
Q9CPW4	Actin-related protein 2/3 complex subunit 5	Arpc5	5	3	1.171	0.965065	51582.1	210080	234327	246052	299646	38616
P50247	Adenosylhomocysteinase	Ahcy	5	1	1.17	0.274676	108999	192490	153068	179143	312193	158722
Q9CZY3	Ubiquitin-conjugating enzyme E2 variant 1	Ube2v1	2	1	1.169	0.891677	140813	141842	186464	186859	165859	128010
P34884	Macrophage migration inhibitory factor	Mif	129	4	1.169	0.23449	1.29249e+07	7.54812e+06	1.06341e+07	1.95239e+07	1.12709e+07	1.24346e+07
P29788	Vitronectin	Vtn	8	3	1.169	0.304927	96090.3	106412	39568.5	112285	91238.6	1.3024e+06
Q80YX1	Tenascin	Tnc	11	5	1.167	0.340425	185088	203873	197359	230355	1.14787e+06	215556
Q91ZA3	Propionyl-CoA carboxylase alpha chain, mitochondrial	Pcca	1473	55	1.167	0.0481063	2.35292e+08	2.27916e+08	2.2592e+08	2.98991e+08	2.65996e+08	2.59e+08
Q9D1G1	Ras-related protein Rab-1B	Rab1b	5	1	1.166	0.17315	137791	165470	141793	160151	214598	165386
P30275	Creatine kinase U-type, mitochondrial	Ckmt1	29	5	1.165	0.799013	892011	651744	812742	969003	947181	598772
Q922B2	Aspartate--tRNA ligase, cytoplasmic	Dars1	7	3	1.165	0.577194	48634.3	59725	67159.3	49279.4	76990.4	69580.4
P61979	Heterogeneous nuclear ribonucleoprotein K	Hnrnpk	12	4	1.163	0.52099	455615	317113	332306	386538	303992	861369
O08553	Dihydropyrimidinase-related protein 2	Dpysl2	205	15	1.162	0.0625016	6.32899e+06	6.80336e+06	6.7132e+06	7.57931e+06	7.80364e+06	9.25298e+06
Q9D8E6	60S ribosomal protein L4	Rpl4	3	1	1.162	0.767486	93700.6	74430.3	93128.4	108204	109238	38528.5
Q60771	Claudin-11	Cldn11	7	1	1.162	0.449873	1.22945e+06	1.4158e+06	1.32247e+06	1.5363e+06	1.9261e+06	1.16877e+06
Q61838	Pregnancy zone protein	Pzp	8	5	1.16	0.342623	82997.2	112049	99754	115237	115749	1.02116e+06
Q91WS0	CDGSH iron-sulfur domain-containing protein 1	Cisd1	15	1	1.159	0.772291	178282	193436	250369	309061	224096	154409
P47911	60S ribosomal protein L6	Rpl6	16	3	1.158	0.160112	358926	425488	369868	428137	564809	423162
P61982	14-3-3 protein gamma	Ywhag	57	3	1.157	0.273389	1.6479e+06	2.03759e+06	1.8948e+06	2.19243e+06	3.19721e+06	1.85736e+06
Q62108	Disks large homolog 4	Dlg4	12	2	1.157	0.385183	87642.5	82640.3	110758	101397	143111	90322.7
P46096	Synaptotagmin-1	Syt1	38	4	1.154	0.245776	877318	808603	964792	1.13617e+06	1.01266e+06	872929
Q8QZT1	Acetyl-CoA acetyltransferase, mitochondrial	Acat1	37	9	1.154	0.589357	1.76825e+06	2.1346e+06	1.96686e+06	2.27017e+06	2.98132e+06	1.57254e+06
O08756	3-hydroxyacyl-CoA dehydrogenase type-2	Hsd17b10	6	1	1.154	0.240808	104963	156528	148358	171205	217750	138273
Q9Z1G4	V-type proton ATPase 116 kDa subunit a 1	Atp6v0a1	38	6	1.153	0.758256	633247	537166	560422	285911	749885	646347
Q9R0Y5	Adenylate kinase isoenzyme 1	Ak1	7	2	1.153	0.475586	377304	84161.8	81485.8	97027.8	103926	67720.2
Q9CPY7	Cytosol aminopeptidase	Lap3	7	2	1.153	0.779909	74115	95045.3	43627.1	102075	21304.3	85438.9
Q8BZ98	Dynamin-3	Dnm3	42	1	1.152	0.128615	299509	347928	318383	359740	477034	366861
P50396	Rab GDP dissociation inhibitor alpha	Gdi1	97	7	1.15	0.280615	3.31709e+06	3.29048e+06	3.19803e+06	3.78438e+06	5.61866e+06	3.30357e+06
Q9DBG3	AP-2 complex subunit beta	Ap2b1	40	7	1.149	0.215632	1.22149e+06	1.37179e+06	1.28731e+06	1.30056e+06	1.73172e+06	1.47889e+06
P12658	Calbindin	Calb1	51	7	1.147	0.656975	2.10748e+06	2.11756e+06	2.37538e+06	2.72794e+06	2.42978e+06	1.89777e+06
P04370	Myelin basic protein	Mbp	110	5	1.142	0.714733	2.24749e+07	2.07854e+07	1.63157e+07	2.3729e+07	2.9757e+07	1.43719e+07
Q9QYC0	Alpha-adducin	Add1	12	3	1.142	0.28505	114325	149484	158429	136985	205226	170642
P68510	14-3-3 protein eta	Ywhah	51	6	1.141	0.476848	1.10627e+06	1.31519e+06	1.2872e+06	1.46841e+06	2.08004e+06	1.03857e+06
Q9Z0E0	Neurochondrin	Ncdn	13	4	1.14	0.948133	85882.4	91021.8	97387.6	49234	139222	103721
Q99MR8	Methylcrotonoyl-CoA carboxylase subunit alpha, mitochondrial	Mccc1	588	38	1.133	0.488229	5.59437e+07	5.65048e+07	5.78102e+07	7.59051e+07	5.06115e+07	6.40292e+07
Q9CR62	Mitochondrial 2-oxoglutarate/malate carrier protein	Slc25a11	14	2	1.133	0.823245	334316	503322	366042	237841	829816	414757
Q8BYI9	Tenascin-R	Tnr	109	17	1.133	0.34404	3.19358e+06	3.41904e+06	2.32954e+06	2.94784e+06	1.21294e+07	3.61816e+06
P10853	Histone H2B type 1-F/J/L	H2bc7	119	3	1.133	0.069461	1.90719e+07	1.66736e+07	1.80619e+07	2.41002e+07	2.04594e+07	2.00636e+07
P46660	Alpha-internexin	Ina	149	15	1.13	0.46513	4.01907e+06	3.91697e+06	3.47044e+06	4.83248e+06	4.42482e+06	3.41179e+06
Q9CQQ7	ATP synthase F(0) complex subunit B1, mitochondrial	Atp5pb	27	3	1.129	0.5959	1.1568e+06	1.18236e+06	1.23203e+06	1.33533e+06	1.76521e+06	982401
Q571F8	Glutaminase liver isoform, mitochondrial	Gls2	12	1	1.128	0.516831	163134	166407	161913	183939	223561	144004
Q9Z2I9	Succinate--CoA ligase	Sucla2	18	4	1.126	0.974052	719130	992422	712911	809764	1.24649e+06	519111
P63038	60 kDa heat shock protein, mitochondrial	Hspd1	11	5	1.126	0.773802	290052	205801	250605	282071	356298	183031
Q8R164	Valacyclovir hydrolase	Bphl	1	1	1.121	0.644323	44136.9	37174.7	46967.9	31214.1	76133.1	49472.1
P12382	ATP-dependent 6-phosphofructokinase, liver type	Pfkl	5	1	1.12	0.852132	69538.1	30347.2	50999.3	36509.6	57140.8	61483
P48774	Glutathione S-transferase Mu 5	Gstm5	14	1	1.12	0.601084	121449	156002	155779	174482	175569	123246
Q08331	Calretinin	Calb2	31	2	1.12	0.787871	435474	469460	587952	525806	542798	368637
P14733	Lamin-B1	Lmnb1	16	6	1.12	0.493222	415559	600496	422988	473703	815365	455994
P07356	Annexin A2	Anxa2	45	9	1.119	0.30161	479688	1.45618e+06	1.44085e+06	1.12284e+06	2.92756e+06	1.61217e+06
P49312	Heterogeneous nuclear ribonucleoprotein A1	Hnrnpa1	21	4	1.116	0.43611	519383	373263	435639	486346	394584	1.07788e+06
P19157	Glutathione S-transferase P 1	Gstp1	5	1	1.115	0.731231	282653	277004	255480	355081	308755	122968
E9Q557	Desmoplakin	Dsp	146	29	1.114	0.629554	2.23106e+06	1.00886e+07	8.95441e+06	3.55208e+06	1.58948e+07	9.97196e+06
P52760	2-iminobutanoate/2-iminopropanoate deaminase	Rida	35	5	1.114	0.336701	1.40569e+06	1.49341e+06	1.41514e+06	2.37983e+06	1.57595e+06	1.42669e+06
P05063	Fructose-bisphosphate aldolase C	Aldoc	276	19	1.112	0.844199	1.45941e+07	1.13648e+07	1.17263e+07	1.30439e+07	1.76422e+07	9.57631e+06
P14148	60S ribosomal protein L7	Rpl7	5	1	1.105	0.373241	75738.6	182466	232430	281390	201710	183196
Q8BH59	Electrogenic aspartate/glutamate antiporter SLC25A12, mitochondrial	Slc25a12	56	11	1.105	0.452145	1.23569e+06	1.4608e+06	1.20051e+06	1.36527e+06	2.53731e+06	1.19647e+06
P32037	Solute carrier family 2, facilitated glucose transporter member 3	Slc2a3	7	2	1.103	0.419393	469360	542099	454581	517834	909704	463305
C0HKE3	Histone H2A type 1-D	H2ac7	112	2	1.103	0.299903	2.11373e+07	1.8121e+07	1.99354e+07	3.03178e+07	2.19912e+07	1.96362e+07
Q8K2B3	Succinate dehydrogenase	Sdha	39	7	1.102	0.301982	1.14746e+06	1.22637e+06	1.1887e+06	1.31038e+06	1.99766e+06	1.21239e+06
P51863	V-type proton ATPase subunit d 1	Atp6v0d1	15	3	1.102	0.638516	576072	514982	583458	634914	800252	450014
Q64524	Histone H2B type 2-E	H2bc21	100	1	1.097	0.269074	298255	288750	278772	405355	316856	291885
P01869	Ig gamma-1 chain C region, membrane-bound form	Ighg1	5	2	1.095	0.166716	301372	339957	375378	465447	368232	372310
P97315	Cysteine and glycine-rich protein 1	Csrp1	11	2	1.083	0.28561	283730	340083	393871	640991	364177	368187
Q8JZU2	Tricarboxylate transport protein, mitochondrial	Slc25a1	5	1	1.081	0.361724	111052	124257	153088	132734	245788	134335
P10649	Glutathione S-transferase Mu 1	Gstm1	27	3	1.079	0.925239	1.04182e+06	1.08933e+06	1.01222e+06	1.12373e+06	1.4662e+06	742666
P20917	Myelin-associated glycoprotein	Mag	53	10	1.078	0.991495	2.58014e+06	1.87162e+06	1.59565e+06	2.01845e+06	3.0746e+06	1.22876e+06
Q8K0S0	Phytanoyl-CoA hydroxylase-interacting protein	Phyhip	18	1	1.077	0.387121	112268	115351	107221	120941	215582	107830
P70404	Isocitrate dehydrogenase	Idh3g	21	4	1.075	0.862547	418910	464363	487505	499059	623329	339118
P17426	AP-2 complex subunit alpha-1	Ap2a1	47	3	1.074	0.439351	259479	298547	269614	289619	455368	259989
Q8BFR5	Elongation factor Tu, mitochondrial	Tufm	41	6	1.074	0.473724	829797	861441	826281	891337	1.29569e+06	769029
Q9D6F9	Tubulin beta-4A chain	Tubb4a	657	7	1.074	0.435467	2.94807e+06	3.12984e+06	3.20601e+06	3.36154e+06	4.49151e+06	2.86958e+06
P53986	Monocarboxylate transporter 1	Slc16a1	4	1	1.074	0.397255	102145	109559	119538	107450	129081	117667
Q6PIC6	Sodium/potassium-transporting ATPase subunit alpha-3	Atp1a3	645	24	1.073	0.392741	4.30821e+07	4.75509e+07	4.54501e+07	4.87512e+07	6.87734e+07	4.34564e+07
Q61656	Probable ATP-dependent RNA helicase DDX5	Ddx5	80	7	1.071	0.501116	2.66639e+06	1.00356e+06	1.90404e+06	2.03846e+06	1.42359e+06	5.04552e+06
P28661	Septin-4	Septin4	7	2	1.069	0.707527	495676	497807	500940	532081	729177	399261
P17183	Gamma-enolase	Eno2	79	6	1.066	0.430832	2.71943e+06	2.62274e+06	3.07369e+06	3.52402e+06	2.89886e+06	2.73496e+06
P09411	Phosphoglycerate kinase 1	Pgk1	68	10	1.066	0.854819	3.4848e+06	3.24345e+06	3.17858e+06	3.456e+06	4.51381e+06	2.5535e+06
P42669	Transcriptional activator protein Pur-alpha	Pura	14	3	1.059	0.354029	388547	411671	394744	394897	540040	418145
Q8VDQ8	NAD-dependent protein deacetylase sirtuin-2	Sirt2	14	5	1.057	0.863644	464657	453020	437764	478782	601078	350849
Q8CAQ8	MICOS complex subunit Mic60	Immt	16	5	1.055	0.83161	253586	327189	280643	295968	331277	255223
P11881	Inositol 1,4,5-trisphosphate receptor type 1	Itpr1	230	37	1.048	0.787279	7.05212e+06	7.73908e+06	7.94413e+06	6.04321e+06	1.01951e+07	8.10984e+06
P21550	Beta-enolase	Eno3	50	3	1.046	0.422434	3.30735e+06	670062	683015	771684	714248	559542
Q640R3	Hepatocyte cell adhesion molecule	Hepacam	7	3	1.045	0.886855	231666	226172	230731	177907	303701	241146
P08414	Calcium/calmodulin-dependent protein kinase type IV	Camk4	7	2	1.04	0.545047	86621.3	78184.6	89781.6	77718.2	90103.6	106956
Q9R0K7	Plasma membrane calcium-transporting ATPase 2	Atp2b2	199	18	1.039	0.844801	6.75063e+06	7.92715e+06	7.75754e+06	5.27222e+06	1.13498e+07	8.05916e+06
Q9WUM4	Coronin-1C	Coro1c	1	1	1.038	0.669153	65243.2	74164.4	56196.7	46703.7	139692	67708.6
O35215	D-dopachrome decarboxylase	Ddt	7	1	1.036	0.298896	125268	98029.9	120082	184213	117390	124394
P70296	Phosphatidylethanolamine-binding protein 1	Pebp1	1	1	1.036	0.706571	172784	158885	186850	178968	318563	40298
P17427	AP-2 complex subunit alpha-2	Ap2a2	51	6	1.033	0.742355	955502	1.04839e+06	904027	732629	1.63587e+06	987267
P27546	Microtubule-associated protein 4	Map4	4	1	1.027	0.805947	118839	180876	153416	121634	157603	199521
Q9QYG0	Protein NDRG2	Ndrg2	26	3	1.027	0.571406	549819	578594	772911	594335	741708	345249
P47857	ATP-dependent 6-phosphofructokinase, muscle type	Pfkm	49	13	1.025	0.627498	2.25442e+06	2.4171e+06	2.5009e+06	2.47829e+06	3.32372e+06	2.08916e+06
P32848	Parvalbumin alpha	Pvalb	34	4	1.02	0.802013	1.44631e+06	1.51501e+06	2.31128e+06	2.70472e+06	1.54525e+06	1.47694e+06
P62823	Ras-related protein Rab-3C	Rab3c	20	2	1.017	0.867674	330854	329192	441180	467088	330774	336595
Q9DB77	Cytochrome b-c1 complex subunit 2, mitochondrial	Uqcrc2	27	7	1.017	0.981913	918333	1.14525e+06	1.01963e+06	1.03712e+06	1.60248e+06	658315
Q61316	Heat shock 70 kDa protein 4	Hspa4	8	2	1.016	0.983903	124548	156928	133885	136025	208442	90756.5
Q64436	Potassium-transporting ATPase alpha chain 1	Atp4a	110	2	1.014	0.667271	1.14358e+06	1.34138e+06	1.0996e+06	997008	2.02618e+06	1.15991e+06
P47738	Aldehyde dehydrogenase, mitochondrial	Aldh2	4	2	1.013	0.449205	45489.2	57163	66915.5	57891.1	98937.6	53868.1
Q9QYR6	Microtubule-associated protein 1A	Map1a	21	7	1.006	0.975549	250730	278622	272773	221105	317568	274446
O88935	Synapsin-1	Syn1	60	10	1.005	0.797874	1.77623e+06	2.29002e+06	1.87178e+06	1.65934e+06	2.83686e+06	1.88146e+06
G5E829	Plasma membrane calcium-transporting ATPase 1	Atp2b1	91	2	1.005	0.979827	46081.3	161307	136643	32788.2	213287	137334
Q925N0	Sideroflexin-5	Sfxn5	8	2	1.003	0.7586	75659.7	80822.7	70669.8	23676.5	138959	75872.9
P03995	Glial fibrillary acidic protein	Gfap	348	3	1.001	0.681001	321740	237882	339149	322213	219118	545312
Q8BVI4	Dihydropteridine reductase	Qdpr	18	4	1.001	0.995529	333842	341386	377315	341873	461295	273475
Q64518	Sarcoplasmic/endoplasmic reticulum calcium ATPase 3	Atp2a3	22	2	1.001	0.740132	144967	120720	103305	90369.4	228770	120871
Q8C8R3	Ankyrin-2	Ank2	27	10	1	0.990403	506151	604373	573045	310423	998811	573250
P08553	Neurofilament medium polypeptide	Nefm	202	18	0.998	0.733479	6.39446e+06	7.77577e+06	6.74489e+06	6.72862e+06	8.54775e+06	6.53523e+06
P06801	NADP-dependent malic enzyme	Me1	7	1	0.996	0.675344	54599.7	78149.5	92834.2	54475.7	147607	77871.8
O35544	Excitatory amino acid transporter 4	Slc1a6	100	6	0.995	0.583139	826736	922083	847537	843657	1.58726e+06	757192
Q9D0M3	Cytochrome c1, heme protein, mitochondrial	Cyc1	20	3	0.992	0.827501	569441	549482	551716	547238	685841	412215
Q7TSF1	Desmoglein-1-beta	Dsg1b	12	3	0.991	0.660283	59947.1	555669	543824	146399	841303	538966
Q99KI0	Aconitate hydratase, mitochondrial	Aco2	189	21	0.99	0.743037	7.2808e+06	8.10041e+06	7.54903e+06	7.47678e+06	1.12636e+07	6.40345e+06
P80318	T-complex protein 1 subunit gamma	Cct3	3	2	0.99	0.451788	223285	604247	542991	537455	743918	454009
Q99PU5	Long-chain-fatty-acid--CoA ligase ACSBG1	Acsbg1	35	4	0.989	0.475209	815025	897201	500605	757584	974510	806201
P63017	Heat shock cognate 71 kDa protein	Hspa8	201	22	0.988	0.698893	1.09265e+07	1.16942e+07	1.16875e+07	1.15418e+07	1.35016e+07	1.05719e+07
Q9CZU6	Citrate synthase, mitochondrial	Cs	41	6	0.986	0.862326	1.04089e+06	1.02067e+06	1.0334e+06	1.01861e+06	1.33855e+06	725289
P13595	Neural cell adhesion molecule 1	Ncam1	96	14	0.984	0.382758	5.63827e+06	5.73325e+06	4.7533e+06	5.54623e+06	1.43629e+07	5.54633e+06
P14211	Calreticulin	Calr	6	2	0.982	0.878119	68798.8	107651	89171.6	87592.6	97590.7	82884.4
P62245	40S ribosomal protein S15a	Rps15a	12	3	0.981	0.694747	255934	323301	367289	356041	312561	317105
P46460	Vesicle-fusing ATPase	Nsf	92	16	0.979	0.684849	2.21933e+06	2.67657e+06	2.6066e+06	2.55163e+06	3.93283e+06	2.03724e+06
D3Z7P3	Glutaminase kidney isoform, mitochondrial	Gls	12	4	0.978	0.77227	454965	425293	499087	386148	661385	445163
P25444	40S ribosomal protein S2	Rps2	1	1	0.971	0.444917	30932.4	37459	54769.7	36380.7	38798.2	26555.1
P08752	Guanine nucleotide-binding protein G(i) subunit alpha-2	Gnai2	16	1	0.971	0.301608	143334	145144	171585	152180	140954	113448
Q9D1A0	Peroxiredoxin-like 2C	Prxl2c	4	1	0.971	0.939228	1.64489e+06	2.36854e+06	1.84424e+06	2.54035e+06	1.79073e+06	1.50857e+06
Q9D051	Pyruvate dehydrogenase E1 component subunit beta, mitochondrial	Pdhb	37	6	0.971	0.764159	1.69875e+06	1.69666e+06	1.59875e+06	1.64727e+06	2.47289e+06	1.35768e+06
P31938	Dual specificity mitogen-activated protein kinase kinase 1	Map2k1	2	1	0.97	0.714863	80183.9	81358.8	80986.3	78589.4	134078	65707.7
P02301	Histone H3.3C	H3-5	30	4	0.97	0.70081	8.76529e+06	8.35771e+06	9.05252e+06	4.72136e+06	1.16206e+07	8.50206e+06
Q9JJV2	Profilin-2	Pfn2	3	1	0.97	0.834195	106084	265291	194329	160039	221185	188415
Q6PIE5	Sodium/potassium-transporting ATPase subunit alpha-2	Atp1a2	558	22	0.961	0.612823	9.59862e+06	1.00743e+07	9.54239e+06	9.22582e+06	1.53947e+07	8.90745e+06
Q9QXA5	U6 snRNA-associated Sm-like protein LSm4	Lsm4	6	1	0.961	0.885024	540070	2.68176e+06	149258	60641.8	3.51572e+06	518905
Q8K0T0	Reticulon-1	Rtn1	17	2	0.961	0.882321	376483	330072	384279	288446	430574	361669
Q810U5	Coiled-coil domain-containing protein 50	Ccdc50	1	1	0.96	0.76974	114983	118490	100292	73574.2	238407	110329
P63085	Mitogen-activated protein kinase 1	Mapk1	8	1	0.958	0.863928	89222.4	82283.4	89400.9	85498	121314	69601.1
P80313	T-complex protein 1 subunit eta	Cct7	4	1	0.957	0.7475	102468	122284	123536	117008	162280	96999.4
Q9JM63	ATP-sensitive inward rectifier potassium channel 10	Kcnj10	11	1	0.954	0.882675	65493.6	77981.5	66052.8	32241.6	134776	63045.7
Q9D6R2	Isocitrate dehydrogenase	Idh3a	25	5	0.947	0.644491	1.05718e+06	972754	1.13801e+06	1.00096e+06	1.29005e+06	657736
P10126	Elongation factor 1-alpha 1	Eef1a1	152	5	0.944	0.862172	1.10866e+06	1.08224e+06	1.18675e+06	1.04637e+06	1.26538e+06	1.03242e+06
P50516	V-type proton ATPase catalytic subunit A	Atp6v1a	49	6	0.943	0.984211	1.42306e+06	1.34962e+06	1.33068e+06	1.27289e+06	1.88567e+06	1.05253e+06
P21278	Guanine nucleotide-binding protein subunit alpha-11	Gna11	3	1	0.943	0.4583	142521	141669	160179	134339	166096	79567
Q8VDN2	Sodium/potassium-transporting ATPase subunit alpha-1	Atp1a1	525	17	0.942	0.630431	7.93611e+06	8.15663e+06	8.3019e+06	7.68452e+06	1.28581e+07	7.3612e+06
P63158	High mobility group protein B1	Hmgb1	16	4	0.941	0.886142	423607	358242	486898	532174	321805	398635
Q8R1I1	Cytochrome b-c1 complex subunit 9	Uqcr10	5	1	0.941	0.86525	109086	114182	142745	77293.9	265688	107444
P05202	Aspartate aminotransferase, mitochondrial	Got2	183	18	0.938	0.673618	1.16896e+07	8.45523e+06	1.48583e+07	1.09703e+07	1.04132e+07	1.7698e+07
Q9D0J8	Parathymosin	Ptms	4	1	0.938	0.873234	310718	341115	402772	547715	274247	319795
Q920N2	Biotin--protein ligase	Hlcs	12	4	0.937	0.384539	553488	636195	557103	616418	521950	407982
P13542	Myosin-8	Myh8	9	3	0.931	0.82169	2.1352e+06	717720	1.18895e+06	2.22444e+06	1.10746e+06	990959
P61264	Syntaxin-1B	Stx1b	41	5	0.925	0.925604	1.31103e+06	1.24241e+06	1.30699e+06	1.60148e+06	1.20952e+06	1.05705e+06
Q05920	Pyruvate carboxylase, mitochondrial	Pc	2034	65	0.922	0.116603	4.90877e+08	4.97869e+08	4.98695e+08	4.07455e+08	4.65742e+08	4.59133e+08
Q62082	Myosin regulatory light chain 10	Myl10	1	1	0.92	0.36175	286661	31294	27818.3	28794.1	20108.7	29929.1
Q6ZQ38	Cullin-associated NEDD8-dissociated protein 1	Cand1	6	2	0.908	0.428392	37084.3	28581.5	50317.7	42546.7	4148.88	33660.3
P68254	14-3-3 protein theta	Ywhaq	32	2	0.907	0.837632	176797	239688	93070	138149	219188	160427
O08599	Syntaxin-binding protein 1	Stxbp1	172	21	0.904	0.767816	1.1345e+07	1.32569e+07	1.24357e+07	1.12444e+07	1.79015e+07	1.09573e+07
P11499	Heat shock protein HSP 90-beta	Hsp90ab1	118	11	0.898	0.829838	1.91927e+06	2.07044e+06	2.66148e+06	1.74742e+06	2.86376e+06	1.85922e+06
P51880	Fatty acid-binding protein, brain	Fabp7	9	1	0.894	0.773168	119539	187386	259829	167610	295514	155535
Q68FD5	Clathrin heavy chain 1	Cltc	340	43	0.892	0.83505	9.77261e+06	1.10855e+07	1.02486e+07	7.21341e+06	1.45285e+07	9.14499e+06
P20357	Microtubule-associated protein 2	Map2	3	1	0.889	0.721681	45403	64385.3	61884.5	47490	55026.5	89661.7
P27773	Protein disulfide-isomerase A3	Pdia3	6	2	0.889	0.276183	145338	151967	160976	135123	152193	101165
Q9CQI6	Coactosin-like protein	Cotl1	35	4	0.886	0.900483	358141	371586	420603	558317	278106	329338
P11438	Lysosome-associated membrane glycoprotein 1	Lamp1	3	1	0.886	0.90035	87869.1	170645	175231	68398.1	310725	151140
Q60864	Stress-induced-phosphoprotein 1	Stip1	5	2	0.885	0.45233	192378	177161	274423	234599	170205	143032
Q8CI94	Glycogen phosphorylase, brain form	Pygb	58	6	0.883	0.405156	2.80877e+06	921656	979326	730394	1.25438e+06	865048
O35945	Aldehyde dehydrogenase, cytosolic 1	Aldh1a7	1	1	0.882	0.6549	75818.6	23164.2	46272.9	40791.1	110022	36791.8
Q9CQN1	Heat shock protein 75 kDa, mitochondrial	Trap1	16	1	0.88	0.937331	1.13005e+06	1.30266e+06	1.17799e+06	1.0364e+06	1.76115e+06	899069
Q9QUI0	Transforming protein RhoA	Rhoa	16	4	0.878	0.971939	707453	877681	912735	1.02979e+06	770699	724975
P84086	Complexin-2	Cplx2	1	1	0.877	0.669666	72730.4	84248.9	90686.6	150919	73851.2	71916.9
P50518	V-type proton ATPase subunit E 1	Atp6v1e1	23	2	0.875	0.364208	450575	368167	442905	387474	417508	353934
P58252	Elongation factor 2	Eef2	45	6	0.871	0.755004	693331	811332	871692	707072	1.20724e+06	701576
Q5SQX6	Cytoplasmic FMR1-interacting protein 2	Cyfip2	3	1	0.871	0.675887	73082.3	92903.2	93428	20046.1	160144	80958.6
O55143	Sarcoplasmic/endoplasmic reticulum calcium ATPase 2	Atp2a2	98	13	0.863	0.951827	2.02852e+06	2.61032e+06	2.69267e+06	1.958e+06	3.35253e+06	2.25204e+06
O89053	Coronin-1A	Coro1a	6	2	0.853	0.638121	110079	82789.7	69364.4	35569	132265	70657.2
Q7TQD2	Tubulin polymerization-promoting protein	Tppp	4	2	0.852	0.680147	80489.5	87574.3	97485.3	160682	27545.4	74588.6
Q91WC3	Long-chain-fatty-acid--CoA ligase 6	Acsl6	4	1	0.838	0.979489	65738.7	77106.5	88220.9	59947.7	117702	64621.9
Q62261	Spectrin beta chain, non-erythrocytic 1	Sptbn1	36	11	0.826	0.148556	972352	1.03908e+06	949112	531044	839076	802830
Q7SIG6	Arf-GAP with SH3 domain, ANK repeat and PH domain-containing protein 2	Asap2	26	1	0.824	0.691299	4.47441e+07	1.5779e+08	1.69739e+08	7.64234e+07	2.43982e+08	1.30047e+08
P43276	Histone H1.5	H1-5	13	3	0.823	0.986525	503427	927559	823404	677862	540524	1.06496e+06
Q6ZWN5	40S ribosomal protein S9	Rps9	1	1	0.821	0.989073	76319.4	54003.1	19926.2	44349.8	61268.8	29617.9
P14824	Annexin A6	Anxa6	18	4	0.821	0.339397	294100	190544	258777	212363	190455	221423
Q9CQV8	14-3-3 protein beta/alpha	Ywhab	32	2	0.818	0.365618	156674	188598	211141	141192	193600	154216
Q9Z0S1	3'(2'),5'-bisphosphate nucleotidase 1	Bpnt1	2	1	0.809	0.481032	100311	128910	107330	86804	130586	82665.6
Q9JLZ3	Methylglutaconyl-CoA hydratase, mitochondrial	Auh	8	1	0.804	0.080777	76951.2	85697.6	96226.6	69809.3	68902.5	49564.8
Q5SWU9	Acetyl-CoA carboxylase 1	Acaca	342	44	0.801	0.310855	1.44269e+07	1.26201e+07	1.46327e+07	1.15586e+07	8.61528e+06	1.45437e+07
Q9WUA3	ATP-dependent 6-phosphofructokinase, platelet type	Pfkp	1	1	0.8	0.913873	90522.8	74153.5	90018.5	44735.2	163041	72049.1
P16546	Spectrin alpha chain, non-erythrocytic 1	Sptan1	132	31	0.797	0.217445	4.03413e+06	4.37331e+06	4.05992e+06	2.54351e+06	4.14003e+06	3.23588e+06
Q9CZ13	Cytochrome b-c1 complex subunit 1, mitochondrial	Uqcrc1	69	9	0.797	0.548716	2.66784e+06	2.99947e+06	2.73895e+06	2.18167e+06	3.65201e+06	1.68694e+06
Q8VDP4	Cell cycle and apoptosis regulator protein 2	Ccar2	3	1	0.795	0.778178	75538.4	24363.9	32271.9	25657.6	24449.7	190942
P07901	Heat shock protein HSP 90-alpha	Hsp90aa1	93	12	0.794	0.683762	4.47375e+06	5.41015e+06	5.8858e+06	4.29331e+06	6.53425e+06	4.02904e+06
P62259	14-3-3 protein epsilon	Ywhae	46	6	0.793	0.8311	1.3362e+06	1.59086e+06	1.45298e+06	1.15203e+06	2.24512e+06	993144
P62264	40S ribosomal protein S14	Rps14	3	1	0.791	0.419095	73019.4	56252.9	43709.8	67590.6	44511.2	17299.7
Q8R0Y6	Cytosolic 10-formyltetrahydrofolate dehydrogenase	Aldh1l1	8	3	0.784	0.838376	233702	237922	236108	185118	336882	183002
Q04447	Creatine kinase B-type	Ckb	224	19	0.781	0.40789	2.18318e+07	1.71065e+07	2.03881e+07	1.5924e+07	2.15965e+07	1.53235e+07
Q61753	D-3-phosphoglycerate dehydrogenase	Phgdh	6	2	0.78	0.383714	131288	141023	146373	110017	157616	94036.9
P26645	Myristoylated alanine-rich C-kinase substrate	Marcks	2	1	0.778	0.254692	60044.6	67252.2	78595.1	15366.7	55187.5	52323.6
O09061	Proteasome subunit beta type-1	Psmb1	1	1	0.776	0.510486	60269.3	74097.6	116542	93839.1	54976.9	57498.4
Q9D0K2	Succinyl-CoA:3-ketoacid coenzyme A transferase 1, mitochondrial	Oxct1	9	3	0.765	0.628412	102577	117461	150284	57177	191181	89904.3
Q8CHC4	Synaptojanin-1	Synj1	2	1	0.765	0.683624	179530	86643.2	169480	22081.6	302188	129605
Q8R016	Bleomycin hydrolase	Blmh	2	2	0.762	0.99117	97822.6	247427	397162	139078	360002	188621
Q9WUB3	Glycogen phosphorylase, muscle form	Pygm	26	2	0.751	0.21523	443717	89452.1	74153.7	67221.1	71224.7	30879.9
Q9JHU4	Cytoplasmic dynein 1 heavy chain 1	Dync1h1	21	4	0.748	0.73292	301759	328621	335833	182078	516266	245914
P38647	Stress-70 protein, mitochondrial	Hspa9	10	2	0.748	0.279296	248976	276953	243600	178006	275761	186228
Q9CQ62	2,4-dienoyl-CoA reductase	Decr1	3	1	0.744	0.868117	61672.8	68081.4	67073.4	29480.8	146669	49876.8
Q7M6Z4	Kinesin-like protein KIF27	Kif27	6	1	0.735	0.66527	270434	820485	833448	414560	1.59148e+06	602878
Q9QXS1	Plectin	Plec	5	3	0.735	0.840967	113431	273220	692486	174357	417031	200689
O55131	Septin-7	Septin7	22	5	0.734	0.575762	657810	826149	886484	606163	992020	543488
Q60597	2-oxoglutarate dehydrogenase complex component E1	Ogdh	46	9	0.733	0.431268	863268	994159	959366	451526	1.16269e+06	702829
P0DP27	Calmodulin-2	Calm2	11	3	0.732	0.0844557	338549	341711	510657	303305	250163	243013
P17710	Hexokinase-1	Hk1	149	22	0.729	0.595056	5.31991e+06	4.70546e+06	4.53991e+06	3.42832e+06	6.57049e+06	3.30485e+06
P00405	Cytochrome c oxidase subunit 2	Mtco2	31	3	0.714	0.300057	2.17814e+06	1.86048e+06	2.31147e+06	1.55615e+06	2.29976e+06	1.34334e+06
P28663	Beta-soluble NSF attachment protein	Napb	5	2	0.711	0.344748	226935	229322	237176	150258	263954	162972
Q61176	Arginase-1	Arg1	12	2	0.702	0.758866	130096	418815	419805	170783	829087	293930
Q9QYF9	Protein NDRG3	Ndrg3	1	1	0.694	0.099379	113500	141407	107364	78822.4	106151	64081.3
O89094	Caspase-14	Casp14	2	1	0.691	0.464618	30126.6	43213.9	409516	26374.4	71766.4	29870.6
Q9EST5	Acidic leucine-rich nuclear phosphoprotein 32 family member B	Anp32b	2	1	0.686	0.0253413	79653.4	93772.9	109473	64367.6	64534.3	47898.5
P0C0S6	Histone H2A.Z	H2az1	60	2	0.684	0.292196	161999	129056	239309	183678	86328.9	110769
P19536	Cytochrome c oxidase subunit 5B, mitochondrial	Cox5b	6	2	0.68	0.793568	113563	212760	245095	144733	241825	131091
Q9D0F9	Phosphoglucomutase-1	Pgm1	5	3	0.668	0.172572	178172	104446	100894	69776	115695	62257.8
Q08189	Protein-glutamine gamma-glutamyltransferase E	Tgm3	12	1	0.653	0.968399	101857	465907	833901	232755	512324	304072
Q80TJ1	Calcium-dependent secretion activator 1	Cadps	11	5	0.651	0.051792	436132	444719	418604	257287	354104	284013
Q02053	Ubiquitin-like modifier-activating enzyme 1	Uba1	30	7	0.632	0.446242	827503	587090	855562	363086	961331	523244
Q76MZ3	Serine/threonine-protein phosphatase 2A 65 kDa regulatory subunit A alpha isoform	Ppp2r1a	21	4	0.617	0.137186	365627	349519	402688	225677	333308	167770
P62814	V-type proton ATPase subunit B, brain isoform	Atp6v1b2	31	6	0.612	0.644495	591449	782983	759522	412881	1.10261e+06	464492
P19246	Neurofilament heavy polypeptide	Nefh	59	2	0.582	0.168863	257796	339286	355290	197319	310758	195945
Q91VD9	NADH-ubiquinone oxidoreductase 75 kDa subunit, mitochondrial	Ndufs1	16	2	0.578	0.250483	313789	373515	330568	178187	372124	191229
Q9JJZ2	Tubulin alpha-8 chain	Tuba8	238	1	0.554	0.328627	106208	122713	160646	65298.6	156487	67924.8
Q9CYH2	Peroxiredoxin-like 2A	Prxl2a	6	2	0.529	0.17678	26257.2	35411.3	76399.6	8772.29	34620.4	18727.2
Q9D3A9	Protein tweety homolog 1	Ttyh1	10	1	0.524	0.681867	109522	50905.6	9576.99	21878	26670	32668
P57780	Alpha-actinin-4	Actn4	1	1	0.488	0.395071	101946	39180.7	18546.8	45711.3	14954.3	19118.7
P21107	Tropomyosin alpha-3 chain	Tpm3	23	8	0.464	0.272366	2.13574e+06	211612	408640	327700	137980	189574
Q91Z83	Myosin-7	Myh7	9	2	0.459	0.190149	1.87504e+06	169943	204408	69137.1	116363	93813.3
P24369	Peptidyl-prolyl cis-trans isomerase B	Ppib	10	2	0.443	0.283807	276091	532398	436185	14275.5	193098	339345
P97807	Fumarate hydratase, mitochondrial	Fh	6	1	0.441	0.218149	136728	222148	255822	57196.6	202689	97897.2
Q62420	Endophilin-A1	Sh3gl2	16	3	0.395	0.241655	38316.3	67028.9	125532	8271.79	26451.8	69809.6
P47708	Rabphilin-3A	Rph3a	2	1	0.392	0.0102828	62290.4	67348.6	87812.9	26369.3	39579.1	24805.8
O70423	Membrane primary amine oxidase	Aoc3	8	2	0.349	0.429555	99117	149258	136245	29146	230362	47544.2
Q8K0U4	Heat shock 70 kDa protein 12A	Hspa12a	5	1	0.32	0.381414	65916.4	54599.4	70297.5	21064.2	113491	7655.69
P53810	Phosphatidylinositol transfer protein alpha isoform	Pitpna	6	1	0.316	0.213752	151951	173176	186053	47458.7	185280	54743.4
P27661	Histone H2AX	H2ax	77	1	0.315	0.0342433	102813	58819.5	134585	27670.8	41423.4	32373.7
P70372	ELAV-like protein 1	Elavl1	3	1	0.299	0.573363	156128	99039.9	180771	22481.6	46665.1	439283
Q8BWF0	Succinate-semialdehyde dehydrogenase, mitochondrial	Aldh5a1	4	1	0.255	0.0413601	135976	79610.8	224047	34712.9	43746.3	33480.6
P48722	Heat shock 70 kDa protein 4L	Hspa4l	2	1	0.252	0.340377	93401.6	88326.1	88800.6	13288.1	153831	22391.1
P06837	Neuromodulin	Gap43	3	1	0.203	0.0122085	90330.3	84568.9	165404	16869.4	18333.7	39388.7
P68033	Actin, alpha cardiac muscle 1	Actc1	327	2	0.165	0.270494	2.31991e+07	1.16999e+06	598692	187358	2.08361e+06	192488
O55100	Synaptogyrin-1	Syngr1	9	1	0.112	0.515862	8878	273825	272988	30449.7	61457.5	23677.2
