# Supplementary material for: Optochemical profiling of receptor-proximal proteins in vivo in minutes
Source: Research Square preprint supplement (doi:10.21203/rs.3.rs-3418321/v1), 2023-11-14
Supplement: Supplementary file 3 [file 805ae1714bebe293755cb5d4.xlsx]

## Sheet: Legend
Supplementary Table 4
Proteomics data for PhoxID targeting GABAaR-proximal proteins in the hippocampus (integrated data from 3 biological replicates x 2 technical replicates)
Sheet name	Description
S4-1	Hit proteins only
S4-2	All detected proteins

## Sheet: S4-1. Hit proteins only
UniProt ID	Protein	Gene	# PSMs	# unique peptides	Median fold change: PhoxID with compound 3 vs. 2	Fold change p-value	Abundances (Grouped): Compound 2, Bio Rep. 1	Abundances (Grouped): Compound 2, Bio Rep. 2	Abundances (Grouped): Compound 2, Bio Rep. 3	Abundances (Grouped): Compound 3, Bio Rep. 1	Abundances (Grouped): Compound 3, Bio Rep. 2	Abundances (Grouped): Compound 3, Bio Rep. 3
Q69ZK9	Neuroligin-2	Nlgn2	224	26	30.625	0.034379	5.63007e+06	1.01849e+06	775940	3.11915e+07	4.39991e+07	2.74253e+07
Q8BHJ7	Gamma-aminobutyric acid receptor subunit alpha-5	Gabra5	17	1	22.098	0.00283796	16364.8	33536.1	16101.6	306655	430255	361628
P22723	Gamma-aminobutyric acid receptor subunit gamma-2	Gabrg2	23	4	18.017	0.0053843	381981	157267	143445	2.83345e+06	4.05476e+06	2.5153e+06
Q8BYM5	Neuroligin-3	Nlgn3	93	10	13.854	0.0122401	1.1065e+06	341515	340470	4.73147e+06	8.04818e+06	3.87931e+06
Q9WVH9	Fibulin-5	Fbln5	19	6	13.77	0.00151724	189090	97018.9	98758.8	1.3599e+06	1.90152e+06	1.2092e+06
P26048	Gamma-aminobutyric acid receptor subunit alpha-2	Gabra2	24	5	10.817	0.000243919	170646	112858	119852	1.29645e+06	1.64575e+06	1.2324e+06
Q9D1T0	Leucine-rich repeat and immunoglobulin-like domain-containing nogo receptor-interacting protein 1	Lingo1	41	9	10.326	0.0031702	459227	200009	246332	2.54374e+06	3.20721e+06	1.74685e+06
P50571	Gamma-aminobutyric acid receptor subunit beta-1	Gabrb1	36	4	8.579	0.00149	205081	131129	109471	1.12489e+06	1.40249e+06	920399
P62812	Gamma-aminobutyric acid receptor subunit alpha-1	Gabra1	59	8	7.342	0.0126758	1.55742e+06	856628	521144	6.28942e+06	8.51935e+06	5.19039e+06
P63080	Gamma-aminobutyric acid receptor subunit beta-3	Gabrb3	52	4	7.275	0.00186786	522862	335533	289325	2.44094e+06	3.32896e+06	1.75241e+06
Q6P9K9	Neurexin-3	Nrxn3	137	22	7.097	0.00274313	2.2557e+06	1.28004e+06	1.13911e+06	9.08388e+06	1.35267e+07	8.67737e+06
Q923L3	CUB and sushi domain-containing protein 1	Csmd1	85	27	6.161	0.0119644	848003	560767	610017	3.75831e+06	6.23532e+06	2.41778e+06
Q8K093	Thyrotropin-releasing hormone-degrading ectoenzyme	Trhde	8	4	6.128	0.0126958	44788.5	14414.5	25407.8	155696	250730	137589
Q9Z1L5	Voltage-dependent calcium channel subunit alpha-2/delta-3	Cacna2d3	22	9	5.771	0.0119188	148503	190442	149059	860184	1.83692e+06	826046
Q9Z218	Dipeptidyl aminopeptidase-like protein 6	Dpp6	128	16	5.768	0.00341741	2.61791e+06	2.39273e+06	1.99551e+06	1.38015e+07	1.51161e+07	8.81925e+06
P04925	Major prion protein	Prnp	31	4	5.567	0.0279737	223633	168603	201123	1.11955e+06	1.18553e+06	487256
P15116	Cadherin-2	Cdh2	26	6	5.482	0.00812533	501654	282755	232720	1.54994e+06	1.91017e+06	1.19427e+06
P60755	MAM domain-containing glycosylphosphatidylinositol anchor protein 2	Mdga2	9	3	5.033	0.00073662	92579.5	138265	131844	663506	970671	608957
P63137	Gamma-aminobutyric acid receptor subunit beta-2	Gabrb2	36	2	4.812	0.0197891	197005	70827.9	122991	591870	747778	487900
P97291	Cadherin-8	Cdh8	2	1	4.731	0.0248156	26843.1	31705.3	11036.9	121616	156428	126986
Q6PHS9	Voltage-dependent calcium channel subunit alpha-2/delta-2	Cacna2d2	40	9	4.727	0.00712708	283671	329442	146780	1.2174e+06	1.89744e+06	1.34104e+06
P0C192	Leucine-rich repeat-containing protein 4B	Lrrc4b	15	4	4.66	0.00175329	69918.6	108551	72230.2	329540	438559	336610
Q6VNS1	NT-3 growth factor receptor	Ntrk3	7	2	4.658	0.0246993	185169	84943.1	69575.4	395657	582595	394918
Q8CGM1	Adhesion G protein-coupled receptor B2	Adgrb2	5	1	4.559	0.0243681	40091.8	11065.5	27841.1	126930	213945	126861
P02468	Laminin subunit gamma-1	Lamc1	31	8	4.458	0.000776942	319532	210385	254974	1.13656e+06	984947	1.39648e+06
Q64487	Receptor-type tyrosine-protein phosphatase delta	Ptprd	44	10	4.449	0.00360318	317427	495934	268194	1.36474e+06	2.06167e+06	1.41214e+06
Q60625	Intercellular adhesion molecule 5	Icam5	257	17	4.366	0.0087873	6.35235e+06	3.65827e+06	3.05918e+06	1.54996e+07	2.29474e+07	1.59727e+07
P35438	Glutamate receptor ionotropic, NMDA 1	Grin1	46	12	3.709	0.00333611	1.03962e+06	1.34339e+06	824710	3.40223e+06	5.9102e+06	3.85585e+06
Q68ED2	Metabotropic glutamate receptor 7	Grm7	11	4	3.575	0.0390117	147638	100373	106321	380094	479393	200995
Q68FM6	Protein phosphatase 1 regulatory subunit 29	Elfn2	12	3	3.426	0.0135877	128314	59266.7	119128	399542	556747	408100
Q9CS84	Neurexin-1	Nrxn1	49	7	3.39	0.00232642	730156	546579	492740	1.85299e+06	2.12898e+06	1.44963e+06
Q3UVX5	Metabotropic glutamate receptor 5	Grm5	9	4	3.337	0.0184183	132346	142842	111839	441693	614880	301311
Q9Z2W9	Glutamate receptor 3	Gria3	30	6	3.237	0.00159374	165339	214846	148290	480865	634906	535120
Q80ZF8	Adhesion G protein-coupled receptor B3	Adgrb3	23	4	3.15	0.0387145	219277	187778	139649	591461	1.04978e+06	370819
B0V2N1	Receptor-type tyrosine-protein phosphatase S	Ptprs	41	9	3.142	0.011571	301117	239073	141387	727517	1.5404e+06	751075
Q80T41	Gamma-aminobutyric acid type B receptor subunit 2	Gabbr2	5	2	3.078	0.0172888	49402.3	49672.1	40981.7	158451	152050	92656
Q61292	Laminin subunit beta-2	Lamb2	118	22	3.074	0.00310701	1.33335e+06	846708	1.15269e+06	2.95317e+06	4.69112e+06	3.54342e+06
Q6PFX6	Cadherin-24	Cdh24	2	1	2.852	0.0267043	27247.1	18227.9	25198.3	71857.1	78139.8	39672.5
Q9CPW0	Contactin-associated protein-like 2	Cntnap2	53	9	2.814	0.00390963	590850	505503	440354	1.42226e+06	1.99085e+06	1.28165e+06
P35436	Glutamate receptor ionotropic, NMDA 2A	Grin2a	23	6	2.811	0.00253376	98053.7	66177.1	98960.1	275607	402703	263385
Q9QUP5	Hyaluronan and proteoglycan link protein 1	Hapln1	62	9	2.801	0.00745857	2.00204e+06	1.45156e+06	1.19552e+06	3.35651e+06	5.20529e+06	4.06537e+06
Q61137	Astrotactin-1	Astn1	6	3	2.734	0.0177844	93862.1	55638.7	66544.1	181903	235890	128069
Q9QZF2	Glypican-1	Gpc1	14	4	2.73	0.0115026	346336	180924	283844	627270	1.05581e+06	774916
Q62059	Versican core protein	Vcan	43	8	2.574	0.00171009	1.03128e+06	822114	826133	1.88332e+06	2.55528e+06	2.12645e+06
P23818	Glutamate receptor 1	Gria1	61	10	2.556	0.00532576	1.0424e+06	1.08143e+06	670418	2.66428e+06	3.4955e+06	2.39941e+06
Q810U3	Neurofascin	Nfasc	142	18	2.461	0.00166257	3.36823e+06	2.99649e+06	2.43548e+06	7.37334e+06	9.83122e+06	7.31533e+06
A2ASQ1	Agrin	Agrn	16	4	2.46	0.00898979	214159	184455	124922	390286	578061	453738
Q03137	Ephrin type-A receptor 4	Epha4	7	3	2.443	0.0390735	86234.7	75820.3	41194.3	185232	199412	168042
P55066	Neurocan core protein	Ncan	78	11	2.399	0.00452392	1.31448e+06	1.09944e+06	869290	2.63751e+06	3.2113e+06	2.42875e+06
Q62443	Neuronal pentraxin-1	Nptx1	4	1	2.384	0.0388297	115073	53214.5	75564	177423	180147	233613
Q6NXK7	Inactive dipeptidyl peptidase 10	Dpp10	27	3	2.375	0.00372647	251785	306870	298260	708376	923104	640706
Q9R1V7	Disintegrin and metalloproteinase domain-containing protein 23	Adam23	14	3	2.361	0.00700207	154834	161273	158005	353427	461911	373051
Q80YX1	Tenascin	Tnc	30	8	2.341	0.0117287	370544	272232	226660	637180	863058	550824
Q8BPN8	DmX-like protein 2	Dmxl2	9	4	2.301	0.0142834	36449.7	35376.2	27409.3	98377.8	81411.4	58148.2
O35136	Neural cell adhesion molecule 2	Ncam2	74	15	2.224	0.00856938	1.98745e+06	1.34756e+06	1.49799e+06	2.83744e+06	4.01791e+06	3.33216e+06
Q05793	Basement membrane-specific heparan sulfate proteoglycan core protein	Hspg2	101	20	2.21	0.0381836	1.80758e+06	1.11125e+06	1.21386e+06	2.2661e+06	2.68315e+06	2.68714e+06
O35874	Neutral amino acid transporter A	Slc1a4	8	2	2.139	0.0263523	59092	68066.2	35970.5	126388	153135	99752.6
Q99PJ0	Neurotrimin	Ntm	35	6	2.053	0.0110279	669939	469704	574264	1.14965e+06	1.80833e+06	1.17882e+06
P10493	Nidogen-1	Nid1	68	12	2.049	0.0310987	1.35493e+06	909434	955061	1.49233e+06	1.95738e+06	1.97435e+06
P10852	4F2 cell-surface antigen heavy chain	Slc3a2	66	10	2.038	0.00777607	1.16278e+06	1.23991e+06	843970	2.37024e+06	2.81149e+06	2.28216e+06
Q61001	Laminin subunit alpha-5	Lama5	23	6	1.994	0.0206248	83866.8	57661.4	93379.6	125077	181711	167238
Q8BUV3	Gephyrin	Gphn	9	3	1.992	0.0265186	247545	341404	200082	615293	493013	481763
Q810U4	Neuronal cell adhesion molecule	Nrcam	110	16	1.97	0.00710827	3.0649e+06	2.53625e+06	2.76745e+06	5.45253e+06	7.07202e+06	5.07079e+06
Q63912	Oligodendrocyte-myelin glycoprotein	Omg	34	5	1.93	0.00751544	208240	260609	290751	503002	609228	428717
Q8BYI9	Tenascin-R	Tnr	333	31	1.929	0.0042272	1.52258e+07	1.44739e+07	1.13531e+07	2.79252e+07	3.71533e+07	2.69942e+07
Q91V14	Solute carrier family 12 member 5	Slc12a5	89	12	1.92	0.0243758	1.50317e+06	2.13324e+06	1.58141e+06	2.60518e+06	3.03576e+06	3.08773e+06
P11627	Neural cell adhesion molecule L1	L1cam	13	5	1.919	0.0149105	333441	243475	265611	400149	550494	509782
Q61361	Brevican core protein	Bcan	87	14	1.918	0.0305394	3.03796e+06	4.05635e+06	2.23865e+06	5.82783e+06	7.65365e+06	5.6574e+06
Q9QYS2	Metabotropic glutamate receptor 3	Grm3	48	9	1.877	0.0150697	853060	798768	721221	1.37852e+06	2.02883e+06	1.49906e+06
O88507	Ciliary neurotrophic factor receptor subunit alpha	Cntfr	6	2	1.833	0.00561358	230866	235426	223558	373496	450166	423248
P01831	Thy-1 membrane glycoprotein	Thy1	59	3	1.769	0.00218692	4.7003e+06	4.35148e+06	4.31839e+06	7.4178e+06	8.80483e+06	7.6971e+06
P13595	Neural cell adhesion molecule 1	Ncam1	206	20	1.741	0.000416549	1.07258e+07	1.21714e+07	1.18601e+07	2.06505e+07	2.23149e+07	2.05705e+07
Q71M36	Chondroitin sulfate proteoglycan 5	Cspg5	23	4	1.73	0.040838	381023	317246	240433	666000	548902	423702
P31650	Sodium- and chloride-dependent GABA transporter 3	Slc6a11	30	3	1.711	0.00483062	768882	858449	721768	1.10851e+06	1.31583e+06	1.35773e+06
Q8BLK3	Limbic system-associated membrane protein	Lsamp	64	7	1.693	0.00484789	1.81548e+06	1.56805e+06	1.44437e+06	2.52609e+06	3.1832e+06	2.65397e+06
O35963	Ras-related protein Rab-33B	Rab33b	13	1	1.67	0.0378605	753306	624473	519980	1.04268e+06	994783	1.06959e+06
P23819	Glutamate receptor 2	Gria2	96	13	1.631	0.0192258	1.83291e+06	1.90069e+06	1.5323e+06	2.72921e+06	4.0491e+06	2.9896e+06
P12960	Contactin-1	Cntn1	533	37	1.629	0.00634421	2.33055e+07	2.33733e+07	2.10312e+07	3.79646e+07	4.51553e+07	3.56582e+07
O88343	Electrogenic sodium bicarbonate cotransporter 1	Slc4a4	46	4	1.626	0.0188106	1.01707e+06	739735	869336	1.41336e+06	1.63481e+06	1.20942e+06
Q91ZX7	Prolow-density lipoprotein receptor-related protein 1	Lrp1	58	16	1.593	0.0213237	841097	738424	874278	1.3201e+06	1.88338e+06	1.34002e+06
Q8R366	Immunoglobulin superfamily member 8	Igsf8	93	9	1.586	0.0219532	1.62163e+06	1.5376e+06	1.87343e+06	2.16082e+06	2.92413e+06	2.57241e+06
O35405	5'-3' exonuclease PLD3	Pld3	15	2	1.58	0.0372388	292389	286190	315212	462081	413364	593239
Q9R1V6	Disintegrin and metalloproteinase domain-containing protein 22	Adam22	12	3	1.556	0.0132238	232570	288201	231315	411392	361984	361571
Q61490	CD166 antigen	Alcam	16	4	1.524	0.0412145	264255	396340	315721	481146	590501	445987
Q9DCT1	1,5-anhydro-D-fructose reductase	Akr1e2	3	1	1.508	0.0304018	96255	138328	109441	206983	164998	164924
P62827	GTP-binding nuclear protein Ran	Ran	85	8	1.497	0.0142612	2.46872e+06	2.95747e+06	2.51172e+06	3.82243e+06	3.29439e+06	3.75881e+06
P14231	Sodium/potassium-transporting ATPase subunit beta-2	Atp1b2	63	4	1.481	0.00135357	2.89704e+06	2.56538e+06	2.73607e+06	3.76896e+06	4.21566e+06	4.05082e+06
P21107	Tropomyosin alpha-3 chain	Tpm3	26	2	1.474	0.0313487	88741.9	85263.3	72344	134258	125697	99964.5
O54991	Contactin-associated protein 1	Cntnap1	51	10	1.46	0.00444054	1.23021e+06	1.09172e+06	1.1388e+06	1.48665e+06	1.72112e+06	1.66274e+06
Q8VI51	VPS10 domain-containing receptor SorCS3	Sorcs3	8	2	1.453	0.0463626	95506.1	93405.3	54810.5	133374	197539	135748
P62242	40S ribosomal protein S8	Rps8	12	2	1.443	0.0229052	265803	235444	194698	339768	409209	318718
O55142	60S ribosomal protein L35a	Rpl35a	6	1	1.442	0.0339113	180868	158370	167222	196934	246886	241148
P55088	Aquaporin-4	Aqp4	9	1	1.402	0.0133984	356609	419590	411021	585820	576270	488891

## Sheet: S4-2. All detected proteins
UniProt ID	Protein	Gene	# PSMs	# unique peptides	Median fold change: PhoxID with compound 3 vs. 2	Fold change p-value	Abundances (Grouped): Compound 2, Bio Rep. 1	Abundances (Grouped): Compound 2, Bio Rep. 2	Abundances (Grouped): Compound 2, Bio Rep. 3	Abundances (Grouped): Compound 3, Bio Rep. 1	Abundances (Grouped): Compound 3, Bio Rep. 2	Abundances (Grouped): Compound 3, Bio Rep. 3
Q69ZK9	Neuroligin-2	Nlgn2	224	26	30.625	0.034379	5.63007e+06	1.01849e+06	775940	3.11915e+07	4.39991e+07	2.74253e+07
P97370	Sodium/potassium-transporting ATPase subunit beta-3	Atp1b3	6	3	22.637	0.12422	994141	26394.6	36135	817992	2.8538e+07	706978
Q8BHJ7	Gamma-aminobutyric acid receptor subunit alpha-5	Gabra5	17	1	22.098	0.00283796	16364.8	33536.1	16101.6	306655	430255	361628
P22723	Gamma-aminobutyric acid receptor subunit gamma-2	Gabrg2	23	4	18.017	0.0053843	381981	157267	143445	2.83345e+06	4.05476e+06	2.5153e+06
Q8BYM5	Neuroligin-3	Nlgn3	93	10	13.854	0.0122401	1.1065e+06	341515	340470	4.73147e+06	8.04818e+06	3.87931e+06
Q9WVH9	Fibulin-5	Fbln5	19	6	13.77	0.00151724	189090	97018.9	98758.8	1.3599e+06	1.90152e+06	1.2092e+06
P26048	Gamma-aminobutyric acid receptor subunit alpha-2	Gabra2	24	5	10.817	0.000243919	170646	112858	119852	1.29645e+06	1.64575e+06	1.2324e+06
Q9D1T0	Leucine-rich repeat and immunoglobulin-like domain-containing nogo receptor-interacting protein 1	Lingo1	41	9	10.326	0.0031702	459227	200009	246332	2.54374e+06	3.20721e+06	1.74685e+06
P50571	Gamma-aminobutyric acid receptor subunit beta-1	Gabrb1	36	4	8.579	0.00149	205081	131129	109471	1.12489e+06	1.40249e+06	920399
P62812	Gamma-aminobutyric acid receptor subunit alpha-1	Gabra1	59	8	7.342	0.0126758	1.55742e+06	856628	521144	6.28942e+06	8.51935e+06	5.19039e+06
P63080	Gamma-aminobutyric acid receptor subunit beta-3	Gabrb3	52	4	7.275	0.00186786	522862	335533	289325	2.44094e+06	3.32896e+06	1.75241e+06
Q6P9K9	Neurexin-3	Nrxn3	137	22	7.097	0.00274313	2.2557e+06	1.28004e+06	1.13911e+06	9.08388e+06	1.35267e+07	8.67737e+06
Q923L3	CUB and sushi domain-containing protein 1	Csmd1	85	27	6.161	0.0119644	848003	560767	610017	3.75831e+06	6.23532e+06	2.41778e+06
Q8K093	Thyrotropin-releasing hormone-degrading ectoenzyme	Trhde	8	4	6.128	0.0126958	44788.5	14414.5	25407.8	155696	250730	137589
Q9Z1L5	Voltage-dependent calcium channel subunit alpha-2/delta-3	Cacna2d3	22	9	5.771	0.0119188	148503	190442	149059	860184	1.83692e+06	826046
Q9Z218	Dipeptidyl aminopeptidase-like protein 6	Dpp6	128	16	5.768	0.00341741	2.61791e+06	2.39273e+06	1.99551e+06	1.38015e+07	1.51161e+07	8.81925e+06
P04925	Major prion protein	Prnp	31	4	5.567	0.0279737	223633	168603	201123	1.11955e+06	1.18553e+06	487256
P15116	Cadherin-2	Cdh2	26	6	5.482	0.00812533	501654	282755	232720	1.54994e+06	1.91017e+06	1.19427e+06
Q80Z24	Neuronal growth regulator 1	Negr1	7	3	5.341	0.12125	23820.6	16049.5	28660.1	127233	278477	32964.3
P60755	MAM domain-containing glycosylphosphatidylinositol anchor protein 2	Mdga2	9	3	5.033	0.00073662	92579.5	138265	131844	663506	970671	608957
P63137	Gamma-aminobutyric acid receptor subunit beta-2	Gabrb2	36	2	4.812	0.0197891	197005	70827.9	122991	591870	747778	487900
P97291	Cadherin-8	Cdh8	2	1	4.731	0.0248156	26843.1	31705.3	11036.9	121616	156428	126986
Q6PHS9	Voltage-dependent calcium channel subunit alpha-2/delta-2	Cacna2d2	40	9	4.727	0.00712708	283671	329442	146780	1.2174e+06	1.89744e+06	1.34104e+06
Q9QXA5	U6 snRNA-associated Sm-like protein LSm4	Lsm4	2	1	4.685	0.532671	17606.4	34184.9	187786	484118	160158	17504
P0C192	Leucine-rich repeat-containing protein 4B	Lrrc4b	15	4	4.66	0.00175329	69918.6	108551	72230.2	329540	438559	336610
Q6VNS1	NT-3 growth factor receptor	Ntrk3	7	2	4.658	0.0246993	185169	84943.1	69575.4	395657	582595	394918
Q8CGM1	Adhesion G protein-coupled receptor B2	Adgrb2	5	1	4.559	0.0243681	40091.8	11065.5	27841.1	126930	213945	126861
P02468	Laminin subunit gamma-1	Lamc1	31	8	4.458	0.000776942	319532	210385	254974	1.13656e+06	984947	1.39648e+06
Q64487	Receptor-type tyrosine-protein phosphatase delta	Ptprd	44	10	4.449	0.00360318	317427	495934	268194	1.36474e+06	2.06167e+06	1.41214e+06
Q60625	Intercellular adhesion molecule 5	Icam5	257	17	4.366	0.0087873	6.35235e+06	3.65827e+06	3.05918e+06	1.54996e+07	2.29474e+07	1.59727e+07
Q6WVG3	BTB/POZ domain-containing protein KCTD12	Kctd12	4	2	4.251	0.15262	38275.8	239167	61209.9	260229	250113	336934
P62482	Voltage-gated potassium channel subunit beta-2	Kcnab2	7	2	3.843	0.290595	33200.7	49324	288193	189538	128364	329591
P06802	Ectonucleotide pyrophosphatase/phosphodiesterase family member 1	Enpp1	4	3	3.798	0.165691	61885.7	13693.1	12723.4	52005.3	453437	48676.2
Q08331	Calretinin	Calb2	11	1	3.751	0.82237	132325	543309	66501.4	527682	496396	39201.4
P35438	Glutamate receptor ionotropic, NMDA 1	Grin1	46	12	3.709	0.00333611	1.03962e+06	1.34339e+06	824710	3.40223e+06	5.9102e+06	3.85585e+06
Q91V92	ATP-citrate synthase	Acly	8	5	3.672	0.0671057	39193.2	24048.9	85571.7	187414	104875	143911
Q68ED2	Metabotropic glutamate receptor 7	Grm7	11	4	3.575	0.0390117	147638	100373	106321	380094	479393	200995
Q68FM6	Protein phosphatase 1 regulatory subunit 29	Elfn2	12	3	3.426	0.0135877	128314	59266.7	119128	399542	556747	408100
Q9CS84	Neurexin-1	Nrxn1	49	7	3.39	0.00232642	730156	546579	492740	1.85299e+06	2.12898e+06	1.44963e+06
Q3UVX5	Metabotropic glutamate receptor 5	Grm5	9	4	3.337	0.0184183	132346	142842	111839	441693	614880	301311
Q9Z2W9	Glutamate receptor 3	Gria3	30	6	3.237	0.00159374	165339	214846	148290	480865	634906	535120
Q80ZF8	Adhesion G protein-coupled receptor B3	Adgrb3	23	4	3.15	0.0387145	219277	187778	139649	591461	1.04978e+06	370819
B0V2N1	Receptor-type tyrosine-protein phosphatase S	Ptprs	41	9	3.142	0.011571	301117	239073	141387	727517	1.5404e+06	751075
Q80T41	Gamma-aminobutyric acid type B receptor subunit 2	Gabbr2	5	2	3.078	0.0172888	49402.3	49672.1	40981.7	158451	152050	92656
Q61292	Laminin subunit beta-2	Lamb2	118	22	3.074	0.00310701	1.33335e+06	846708	1.15269e+06	2.95317e+06	4.69112e+06	3.54342e+06
Q6PFX6	Cadherin-24	Cdh24	2	1	2.852	0.0267043	27247.1	18227.9	25198.3	71857.1	78139.8	39672.5
Q9CPW0	Contactin-associated protein-like 2	Cntnap2	53	9	2.814	0.00390963	590850	505503	440354	1.42226e+06	1.99085e+06	1.28165e+06
P35436	Glutamate receptor ionotropic, NMDA 2A	Grin2a	23	6	2.811	0.00253376	98053.7	66177.1	98960.1	275607	402703	263385
Q9QUP5	Hyaluronan and proteoglycan link protein 1	Hapln1	62	9	2.801	0.00745857	2.00204e+06	1.45156e+06	1.19552e+06	3.35651e+06	5.20529e+06	4.06537e+06
Q61137	Astrotactin-1	Astn1	6	3	2.734	0.0177844	93862.1	55638.7	66544.1	181903	235890	128069
Q9QZF2	Glypican-1	Gpc1	14	4	2.73	0.0115026	346336	180924	283844	627270	1.05581e+06	774916
P70206	Plexin-A1	Plxna1	26	5	2.619	0.0700091	140708	40958.6	82553	216196	326351	204315
Q9WUC3	Lymphocyte antigen 6H	Ly6h	9	2	2.59	0.0662551	198541	94146.3	111151	287863	303830	282931
P49722	Proteasome subunit alpha type-2	Psma2	18	6	2.579	0.125659	28375.8	31566.5	13961.1	27416.4	73167.7	89647.8
Q62059	Versican core protein	Vcan	43	8	2.574	0.00171009	1.03128e+06	822114	826133	1.88332e+06	2.55528e+06	2.12645e+06
P23818	Glutamate receptor 1	Gria1	61	10	2.556	0.00532576	1.0424e+06	1.08143e+06	670418	2.66428e+06	3.4955e+06	2.39941e+06
E9Q7X7	Neurexin-2	Nrxn2	17	2	2.532	0.0523015	32079.9	38073.8	66929.6	96410.1	168047	74360.8
P62897	Cytochrome c, somatic	Cycs	61	7	2.48	0.303986	4.08869e+06	4.29751e+06	1.34015e+07	1.06561e+07	1.48125e+07	7.51471e+06
Q9CQ69	Cytochrome b-c1 complex subunit 8	Uqcrq	12	1	2.476	0.100552	254249	122366	131065	324549	254405	328295
Q810U3	Neurofascin	Nfasc	142	18	2.461	0.00166257	3.36823e+06	2.99649e+06	2.43548e+06	7.37334e+06	9.83122e+06	7.31533e+06
A2ASQ1	Agrin	Agrn	16	4	2.46	0.00898979	214159	184455	124922	390286	578061	453738
B9EKR1	Receptor-type tyrosine-protein phosphatase zeta	Ptprz1	45	6	2.459	0.095631	869420	931018	983942	1.29015e+06	3.49344e+06	2.28919e+06
Q03137	Ephrin type-A receptor 4	Epha4	7	3	2.443	0.0390735	86234.7	75820.3	41194.3	185232	199412	168042
P55066	Neurocan core protein	Ncan	78	11	2.399	0.00452392	1.31448e+06	1.09944e+06	869290	2.63751e+06	3.2113e+06	2.42875e+06
Q62443	Neuronal pentraxin-1	Nptx1	4	1	2.384	0.0388297	115073	53214.5	75564	177423	180147	233613
Q6NXK7	Inactive dipeptidyl peptidase 10	Dpp10	27	3	2.375	0.00372647	251785	306870	298260	708376	923104	640706
Q9R1V7	Disintegrin and metalloproteinase domain-containing protein 23	Adam23	14	3	2.361	0.00700207	154834	161273	158005	353427	461911	373051
Q80YX1	Tenascin	Tnc	30	8	2.341	0.0117287	370544	272232	226660	637180	863058	550824
Q8BPN8	DmX-like protein 2	Dmxl2	9	4	2.301	0.0142834	36449.7	35376.2	27409.3	98377.8	81411.4	58148.2
Q8R5M8	Cell adhesion molecule 1	Cadm1	5	1	2.269	0.217684	11455.8	40569.2	45979.7	92039.1	125035	29101.4
P62702	40S ribosomal protein S4, X isoform	Rps4x	8	3	2.226	0.191769	295997	556698	158224	855164	381510	658973
O35136	Neural cell adhesion molecule 2	Ncam2	74	15	2.224	0.00856938	1.98745e+06	1.34756e+06	1.49799e+06	2.83744e+06	4.01791e+06	3.33216e+06
P07758	Alpha-1-antitrypsin 1-1	Serpina1a	12	3	2.218	0.479428	31678.2	44886.2	17901.5	17153.7	70270.1	82807.9
Q05793	Basement membrane-specific heparan sulfate proteoglycan core protein	Hspg2	101	20	2.21	0.0381836	1.80758e+06	1.11125e+06	1.21386e+06	2.2661e+06	2.68315e+06	2.68714e+06
Q80TR1	Adhesion G protein-coupled receptor L1	Adgrl1	3	2	2.152	0.0892218	39820.5	33693.8	59989.6	52776.1	85710.9	88945.6
O35874	Neutral amino acid transporter A	Slc1a4	8	2	2.139	0.0263523	59092	68066.2	35970.5	126388	153135	99752.6
Q99PJ0	Neurotrimin	Ntm	35	6	2.053	0.0110279	669939	469704	574264	1.14965e+06	1.80833e+06	1.17882e+06
P10493	Nidogen-1	Nid1	68	12	2.049	0.0310987	1.35493e+06	909434	955061	1.49233e+06	1.95738e+06	1.97435e+06
P10852	4F2 cell-surface antigen heavy chain	Slc3a2	66	10	2.038	0.00777607	1.16278e+06	1.23991e+06	843970	2.37024e+06	2.81149e+06	2.28216e+06
P63163	Small nuclear ribonucleoprotein-associated protein N	Snrpn	2	1	2.027	0.486974	57501.3	89054.5	25019.5	139735	116545	31391
Q61001	Laminin subunit alpha-5	Lama5	23	6	1.994	0.0206248	83866.8	57661.4	93379.6	125077	181711	167238
Q8BUV3	Gephyrin	Gphn	9	3	1.992	0.0265186	247545	341404	200082	615293	493013	481763
Q810U4	Neuronal cell adhesion molecule	Nrcam	110	16	1.97	0.00710827	3.0649e+06	2.53625e+06	2.76745e+06	5.45253e+06	7.07202e+06	5.07079e+06
Q80UG2	Plexin-A4	Plxna4	43	10	1.949	0.213097	713318	904234	1.80764e+06	3.27677e+06	1.7624e+06	1.2083e+06
Q9JKD3	Secretory carrier-associated membrane protein 5	Scamp5	23	3	1.936	0.0531713	761764	952812	505812	1.56535e+06	1.47509e+06	1.08674e+06
Q63912	Oligodendrocyte-myelin glycoprotein	Omg	34	5	1.93	0.00751544	208240	260609	290751	503002	609228	428717
Q8BYI9	Tenascin-R	Tnr	333	31	1.929	0.0042272	1.52258e+07	1.44739e+07	1.13531e+07	2.79252e+07	3.71533e+07	2.69942e+07
Q91V14	Solute carrier family 12 member 5	Slc12a5	89	12	1.92	0.0243758	1.50317e+06	2.13324e+06	1.58141e+06	2.60518e+06	3.03576e+06	3.08773e+06
P11627	Neural cell adhesion molecule L1	L1cam	13	5	1.919	0.0149105	333441	243475	265611	400149	550494	509782
Q61361	Brevican core protein	Bcan	87	14	1.918	0.0305394	3.03796e+06	4.05635e+06	2.23865e+06	5.82783e+06	7.65365e+06	5.6574e+06
Q9CQE1	Protein NipSnap homolog 3B	Nipsnap3b	23	3	1.914	0.30039	324105	887234	596909	1.24206e+06	1.14223e+06	514401
Q9QYS2	Metabotropic glutamate receptor 3	Grm3	48	9	1.877	0.0150697	853060	798768	721221	1.37852e+06	2.02883e+06	1.49906e+06
Q8CJH3	Plexin-B1	Plxnb1	8	4	1.841	0.0908133	176944	101216	154508	284388	384460	175617
O88507	Ciliary neurotrophic factor receptor subunit alpha	Cntfr	6	2	1.833	0.00561358	230866	235426	223558	373496	450166	423248
P02463	Collagen alpha-1(IV) chain	Col4a1	8	2	1.815	0.194889	187722	100555	91434.7	141752	182546	360456
P26883	Peptidyl-prolyl cis-trans isomerase FKBP1A	Fkbp1a	14	1	1.81	0.303663	214535	297636	86467.3	388314	415660	177494
Q7TN29	Stromal membrane-associated protein 2	Smap2	1	1	1.809	0.179762	21852.9	64744.4	41818	115872	75644	48896.3
Q8BG39	Synaptic vesicle glycoprotein 2B	Sv2b	28	4	1.793	0.147263	282225	313662	347241	725406	562258	338594
Q9JMH6	Thioredoxin reductase 1, cytoplasmic	Txnrd1	3	1	1.775	0.707276	35887.8	122864	80546.9	142993	28786.3	204800
P01831	Thy-1 membrane glycoprotein	Thy1	59	3	1.769	0.00218692	4.7003e+06	4.35148e+06	4.31839e+06	7.4178e+06	8.80483e+06	7.6971e+06
Q9D0F9	Phosphoglucomutase-1	Pgm1	8	2	1.742	0.683709	44477.9	169299	58259	107296	101503	72630.1
P13595	Neural cell adhesion molecule 1	Ncam1	206	20	1.741	0.000416549	1.07258e+07	1.21714e+07	1.18601e+07	2.06505e+07	2.23149e+07	2.05705e+07
Q71M36	Chondroitin sulfate proteoglycan 5	Cspg5	23	4	1.73	0.040838	381023	317246	240433	666000	548902	423702
P31650	Sodium- and chloride-dependent GABA transporter 3	Slc6a11	30	3	1.711	0.00483062	768882	858449	721768	1.10851e+06	1.31583e+06	1.35773e+06
Q4V9Z5	Seizure 6-like protein 2	Sez6l2	2	1	1.702	0.130489	20569.3	42484.5	26147.1	44511.1	58308.3	39150.8
Q8BLK3	Limbic system-associated membrane protein	Lsamp	64	7	1.693	0.00484789	1.81548e+06	1.56805e+06	1.44437e+06	2.52609e+06	3.1832e+06	2.65397e+06
O35963	Ras-related protein Rab-33B	Rab33b	13	1	1.67	0.0378605	753306	624473	519980	1.04268e+06	994783	1.06959e+06
P48320	Glutamate decarboxylase 2	Gad2	4	1	1.637	0.42927	130755	49972.9	9083.29	81812.9	80186.9	90202.2
P23819	Glutamate receptor 2	Gria2	96	13	1.631	0.0192258	1.83291e+06	1.90069e+06	1.5323e+06	2.72921e+06	4.0491e+06	2.9896e+06
P12960	Contactin-1	Cntn1	533	37	1.629	0.00634421	2.33055e+07	2.33733e+07	2.10312e+07	3.79646e+07	4.51553e+07	3.56582e+07
O88343	Electrogenic sodium bicarbonate cotransporter 1	Slc4a4	46	4	1.626	0.0188106	1.01707e+06	739735	869336	1.41336e+06	1.63481e+06	1.20942e+06
P25444	40S ribosomal protein S2	Rps2	3	1	1.621	0.891625	70347.8	150848	77957.7	126382	32610.8	157288
Q9JIA1	Leucine-rich glioma-inactivated protein 1	Lgi1	26	4	1.613	0.0864941	1.03969e+06	1.29366e+06	743728	1.67753e+06	1.71879e+06	1.39682e+06
P01869	Ig gamma-1 chain C region, membrane-bound form	Ighg1	23	4	1.609	0.0636018	98925.6	141079	103814	146040	230562	167084
P68404	Protein kinase C beta type	Prkcb	20	9	1.604	0.171501	617016	850481	335958	1.06639e+06	902455	989853
Q921M7	CYFIP-related Rac1 interactor B	Cyrib	7	2	1.601	0.287091	59672.6	110216	22633.6	123691	95555.3	90998.3
Q7TSF1	Desmoglein-1-beta	Dsg1b	7	1	1.6	0.298554	165358	92579.9	22439.3	83583.2	148154	440215
P59034	Leucine-rich repeat-containing protein 3	Lrrc3	9	1	1.596	0.119049	2.97825e+07	4.4798e+07	3.25463e+07	8.14192e+07	5.19414e+07	4.24955e+07
Q91ZX7	Prolow-density lipoprotein receptor-related protein 1	Lrp1	58	16	1.593	0.0213237	841097	738424	874278	1.3201e+06	1.88338e+06	1.34002e+06
Q8R366	Immunoglobulin superfamily member 8	Igsf8	93	9	1.586	0.0219532	1.62163e+06	1.5376e+06	1.87343e+06	2.16082e+06	2.92413e+06	2.57241e+06
Q9CZT8	Ras-related protein Rab-3B	Rab3b	26	2	1.581	0.314656	1.10961e+06	1.79421e+06	423839	1.87871e+06	1.75406e+06	1.3855e+06
O35405	5'-3' exonuclease PLD3	Pld3	15	2	1.58	0.0372388	292389	286190	315212	462081	413364	593239
Q9CQW2	ADP-ribosylation factor-like protein 8B	Arl8b	17	2	1.565	0.0646962	2.28393e+06	2.81981e+06	2.13729e+06	2.8356e+06	3.57399e+06	4.26932e+06
Q9R1V6	Disintegrin and metalloproteinase domain-containing protein 22	Adam22	12	3	1.556	0.0132238	232570	288201	231315	411392	361984	361571
Q5DTL9	Sodium-driven chloride bicarbonate exchanger	Slc4a10	22	2	1.554	0.726809	42345.1	80586.4	66945.8	26314.9	165777	104013
Q8BWF0	Succinate-semialdehyde dehydrogenase, mitochondrial	Aldh5a1	14	3	1.547	0.573398	111402	147528	91905.9	447396	62070.6	172329
Q62189	U1 small nuclear ribonucleoprotein A	Snrpa	5	1	1.545	0.543609	437140	266667	1.16259e+06	1.12755e+06	675271	489255
Q9D0M3	Cytochrome c1, heme protein, mitochondrial	Cyc1	26	5	1.544	0.331117	682828	1.21178e+06	749985	1.15826e+06	824235	1.45117e+06
Q9Z140	Copine-6	Cpne6	51	8	1.532	0.19582	1.29338e+06	1.98992e+06	1.30881e+06	2.00492e+06	1.80374e+06	2.06319e+06
Q61490	CD166 antigen	Alcam	16	4	1.524	0.0412145	264255	396340	315721	481146	590501	445987
P70408	Cadherin-10	Cdh10	9	3	1.524	0.368557	155751	100141	107805	164246	346754	102150
Q9D0M5	Dynein light chain 2, cytoplasmic	Dynll2	44	2	1.509	0.0957123	724218	479036	540482	815462	748623	860066
Q9DCT1	1,5-anhydro-D-fructose reductase	Akr1e2	3	1	1.508	0.0304018	96255	138328	109441	206983	164998	164924
Q9CR62	Mitochondrial 2-oxoglutarate/malate carrier protein	Slc25a11	16	4	1.504	0.318219	674525	946933	614246	1.01598e+06	703386	1.01474e+06
Q9Z1S5	Neuronal-specific septin-3	Septin3	14	4	1.504	0.762289	758612	1.63161e+06	1.00158e+06	1.50628e+06	737539	1.53671e+06
Q99KB8	Hydroxyacylglutathione hydrolase, mitochondrial	Hagh	26	4	1.5	0.35182	2.1256e+06	1.87946e+06	3.58569e+06	3.18894e+06	2.72039e+06	3.38303e+06
P62827	GTP-binding nuclear protein Ran	Ran	85	8	1.497	0.0142612	2.46872e+06	2.95747e+06	2.51172e+06	3.82243e+06	3.29439e+06	3.75881e+06
P70663	SPARC-like protein 1	Sparcl1	2	1	1.485	0.320301	114651	84451.7	193003	170207	235379	129740
P14231	Sodium/potassium-transporting ATPase subunit beta-2	Atp1b2	63	4	1.481	0.00135357	2.89704e+06	2.56538e+06	2.73607e+06	3.76896e+06	4.21566e+06	4.05082e+06
P21107	Tropomyosin alpha-3 chain	Tpm3	26	2	1.474	0.0313487	88741.9	85263.3	72344	134258	125697	99964.5
P61982	14-3-3 protein gamma	Ywhag	147	6	1.465	0.273314	4.11814e+06	6.68103e+06	4.5496e+06	7.71025e+06	5.07513e+06	6.66354e+06
O54991	Contactin-associated protein 1	Cntnap1	51	10	1.46	0.00444054	1.23021e+06	1.09172e+06	1.1388e+06	1.48665e+06	1.72112e+06	1.66274e+06
Q6PAQ4	RNA exonuclease 4	Rexo4	2	1	1.454	0.108004	30949.1	44524.5	32587	47387	45921.9	51085.1
Q8VI51	VPS10 domain-containing receptor SorCS3	Sorcs3	8	2	1.453	0.0463626	95506.1	93405.3	54810.5	133374	197539	135748
Q9JLM8	Serine/threonine-protein kinase DCLK1	Dclk1	11	4	1.453	0.738431	84322.1	202972	74448.6	122506	25597.6	191086
Q63844	Mitogen-activated protein kinase 3	Mapk3	6	1	1.445	0.777181	220434	417340	237837	343667	215604	375767
P62242	40S ribosomal protein S8	Rps8	12	2	1.443	0.0229052	265803	235444	194698	339768	409209	318718
Q9CZM2	60S ribosomal protein L15	Rpl15	1	1	1.443	0.0528652	226780	265563	188869	327187	340887	298976
Q8K212	Phosphofurin acidic cluster sorting protein 1	Pacs1	14	4	1.443	0.285886	335942	529979	299612	484678	430489	541497
O55142	60S ribosomal protein L35a	Rpl35a	6	1	1.442	0.0339113	180868	158370	167222	196934	246886	241148
Q6ZWN5	40S ribosomal protein S9	Rps9	11	2	1.441	0.283677	325041	501093	305719	503525	413989	468433
P97333	Neuropilin-1	Nrp1	4	3	1.435	0.29635	5.13888e+06	768201	6.11566e+06	7.37304e+06	7.01406e+06	7.60838e+06
Q8K386	Ras-related protein Rab-15	Rab15	26	2	1.433	0.299501	1.84781e+06	2.82791e+06	1.43774e+06	2.96855e+06	2.64859e+06	2.18348e+06
P47738	Aldehyde dehydrogenase, mitochondrial	Aldh2	25	6	1.428	0.723753	258525	402931	190025	384776	197593	369073
O88844	Isocitrate dehydrogenase	Idh1	16	2	1.418	0.646696	275349	524419	215137	390332	278639	451701
P97797	Tyrosine-protein phosphatase non-receptor type substrate 1	Sirpa	91	9	1.412	0.0559141	2.58483e+06	3.00074e+06	3.49445e+06	3.88238e+06	4.2508e+06	4.23582e+06
Q60597	2-oxoglutarate dehydrogenase complex component E1	Ogdh	26	7	1.408	0.46138	606438	952951	513489	867896	671716	854133
P55088	Aquaporin-4	Aqp4	9	1	1.402	0.0133984	356609	419590	411021	585820	576270	488891
Q8C8R3	Ankyrin-2	Ank2	58	14	1.393	0.446837	929824	903563	508468	1.25835e+06	596758	1.28251e+06
Q9R0Q6	Actin-related protein 2/3 complex subunit 1A	Arpc1a	28	5	1.391	0.255718	1.07821e+06	1.56477e+06	1.03372e+06	1.50019e+06	1.37789e+06	1.56228e+06
P35980	60S ribosomal protein L18	Rpl18	15	2	1.391	0.317233	129536	213416	138862	193328	193184	190878
P19783	Cytochrome c oxidase subunit 4 isoform 1, mitochondrial	Cox4i1	105	6	1.386	0.00899829	3.33565e+06	3.83827e+06	3.36362e+06	4.99302e+06	4.61349e+06	4.66309e+06
O88935	Synapsin-1	Syn1	183	16	1.384	0.711903	7.97973e+06	1.12083e+07	7.20162e+06	1.10453e+07	6.70647e+06	1.12529e+07
Q9EQF6	Dihydropyrimidinase-related protein 5	Dpysl5	116	14	1.384	0.13669	1.78921e+06	2.01838e+06	1.35291e+06	2.56304e+06	1.85339e+06	2.4765e+06
Q9Z1N5	Spliceosome RNA helicase Ddx39b	Ddx39b	16	5	1.383	0.16115	461672	649507	481802	666202	625274	687012
Q8BGN8	Synaptoporin	Synpr	7	1	1.379	0.608709	137613	81994.1	79576.9	113034	76257.5	169545
Q3U492	Kielin/chordin-like protein	Kcp	1	1	1.378	0.528659	36379.4	2.57612e+06	28449.1	50123.4	64196.3	29728.6
Q8R570	Synaptosomal-associated protein 47	Snap47	1	1	1.371	0.0841962	125729	143782	143763	197128	234547	156894
P52760	2-iminobutanoate/2-iminopropanoate deaminase	Rida	58	5	1.37	0.503754	1.73425e+06	1.67964e+06	2.79425e+06	2.37522e+06	1.94487e+06	2.707e+06
P60335	Poly(rC)-binding protein 1	Pcbp1	62	5	1.368	0.781574	1.88784e+06	982175	940464	1.34361e+06	946262	1.77629e+06
Q91V41	Ras-related protein Rab-14	Rab14	52	6	1.361	0.105566	1.13098e+06	1.41306e+06	1.04476e+06	1.5396e+06	1.43065e+06	1.56513e+06
P61358	60S ribosomal protein L27	Rpl27	11	2	1.353	0.498921	97123.9	148796	232123	201357	244064	135828
Q9CPU4	Microsomal glutathione S-transferase 3	Mgst3	7	2	1.35	0.0153296	157656	152103	129747	228605	185830	205389
P62874	Guanine nucleotide-binding protein G(I)/G(S)/G(T) subunit beta-1	Gnb1	169	7	1.346	0.461781	9.50098e+06	1.33189e+07	9.30705e+06	1.31687e+07	9.99693e+06	1.27906e+07
P59999	Actin-related protein 2/3 complex subunit 4	Arpc4	67	6	1.345	0.0988161	2.77524e+06	4.06405e+06	3.36216e+06	5.02576e+06	4.02237e+06	4.52367e+06
Q9JKC6	Cell cycle exit and neuronal differentiation protein 1	Cend1	16	2	1.345	0.0785847	174588	116589	168693	240989	209153	226921
Q8K400	Syntaxin-binding protein 5	Stxbp5	14	3	1.344	0.381211	197441	232792	86055.3	265350	162777	266617
P55288	Cadherin-11	Cdh11	13	4	1.343	0.125525	235898	243352	104025	270654	609074	316843
P08122	Collagen alpha-2(IV) chain	Col4a2	9	2	1.343	0.420657	224522	129168	126635	156534	173485	261815
Q8BXR1	Probable cationic amino acid transporter	Slc7a14	9	1	1.343	0.30041	31586.7	56729.9	40196	67540.2	53980.5	42809.9
P17426	AP-2 complex subunit alpha-1	Ap2a1	231	15	1.339	0.417723	6.61486e+06	9.93006e+06	6.47229e+06	8.85772e+06	7.28115e+06	1.07113e+07
Q99N28	Cell adhesion molecule 3	Cadm3	69	7	1.339	0.0263987	1.78372e+06	1.87722e+06	1.72928e+06	2.3884e+06	2.88545e+06	2.3315e+06
P60202	Myelin proteolipid protein	Plp1	182	7	1.337	0.172571	4.05553e+07	5.55436e+07	4.06263e+07	5.33507e+07	5.94809e+07	5.4306e+07
Q9D051	Pyruvate dehydrogenase E1 component subunit beta, mitochondrial	Pdhb	63	8	1.333	0.431979	1.60188e+06	2.46209e+06	1.64802e+06	2.19671e+06	1.87297e+06	2.42067e+06
Q6PIE5	Sodium/potassium-transporting ATPase subunit alpha-2	Atp1a2	805	23	1.326	0.256946	1.3912e+07	1.9086e+07	1.52063e+07	2.24046e+07	1.56834e+07	2.01694e+07
Q56A07	Sodium channel subunit beta-2	Scn2b	8	1	1.324	0.16639	213137	284474	365007	376552	436005	350098
Q64332	Synapsin-2	Syn2	200	13	1.322	0.518434	8.64207e+06	1.30035e+07	6.94886e+06	1.15393e+07	9.20597e+06	1.14244e+07
Q8BLQ9	Cell adhesion molecule 2	Cadm2	43	9	1.317	0.0918912	848484	966759	892936	1.17611e+06	1.49213e+06	1.03622e+06
Q8K310	Matrin-3	Matr3	10	1	1.316	0.298964	248854	326435	246726	346039	270736	327441
P19246	Neurofilament heavy polypeptide	Nefh	82	4	1.311	0.453639	247571	594690	402551	559922	527942	409956
O88569	Heterogeneous nuclear ribonucleoproteins A2/B1	Hnrnpa2b1	9	3	1.311	0.719983	672977	3.23522e+06	353830	1.06098e+06	882220	341708
Q9DCZ4	MICOS complex subunit Mic26	Apoo	25	2	1.308	0.725374	576758	648855	815669	969497	199929	848452
P52480	Pyruvate kinase PKM	Pkm	393	25	1.304	0.463323	2.54649e+07	3.59577e+07	2.4725e+07	3.32092e+07	2.78913e+07	3.44302e+07
P54227	Stathmin	Stmn1	19	3	1.29	0.326708	513012	793185	918910	1.06777e+06	1.02358e+06	713664
Q8CAA7	Glucose 1,6-bisphosphate synthase	Pgm2l1	16	3	1.287	0.586904	256998	369797	261990	337289	274986	344430
P06151	L-lactate dehydrogenase A chain	Ldha	106	10	1.286	0.38364	8.42049e+06	1.13341e+07	8.33511e+06	1.10617e+07	9.38993e+06	1.08246e+07
P43006	Excitatory amino acid transporter 2	Slc1a2	190	13	1.285	0.0149596	2.40609e+07	2.67111e+07	2.82384e+07	3.6255e+07	3.15334e+07	3.43279e+07
P16858	Glyceraldehyde-3-phosphate dehydrogenase	Gapdh	419	17	1.285	0.0693205	5.76186e+07	6.69814e+07	5.69586e+07	7.56234e+07	6.55353e+07	7.40112e+07
Q9WUA3	ATP-dependent 6-phosphofructokinase, platelet type	Pfkp	50	4	1.284	0.401503	324731	371808	224356	416931	275865	419426
Q8BMF3	NADP-dependent malic enzyme, mitochondrial	Me3	2	1	1.283	0.19823	77783.7	120394	99983.8	133275	110355	128309
Q9Z1B3	1-phosphatidylinositol 4,5-bisphosphate phosphodiesterase beta-1	Plcb1	18	5	1.281	0.861804	189852	182827	399783	243141	205230	327671
Q8BH59	Electrogenic aspartate/glutamate antiporter SLC25A12, mitochondrial	Slc25a12	142	16	1.281	0.629284	4.09225e+06	5.88654e+06	3.77174e+06	5.24028e+06	4.04065e+06	5.60481e+06
Q9WUM5	Succinate--CoA ligase	Suclg1	70	6	1.279	0.0450223	1.40033e+06	1.60053e+06	1.39521e+06	1.80303e+06	1.76473e+06	1.79048e+06
Q9Z2Q6	Septin-5	Septin5	26	5	1.275	0.777224	566106	902406	645379	911381	534340	822954
Q6GSS7	Histone H2A type 2-A	Hist2h2aa1	89	1	1.273	0.153766	723467	571995	908208	921331	895292	1.07317e+06
P63011	Ras-related protein Rab-3A	Rab3a	151	6	1.273	0.0299686	1.35083e+07	1.52307e+07	1.35921e+07	1.73083e+07	1.57305e+07	1.81499e+07
Q9JIS5	Synaptic vesicle glycoprotein 2A	Sv2a	60	7	1.271	0.0431514	763973	849195	667424	1.12756e+06	908373	971046
Q8C0M9	Isoaspartyl peptidase/L-asparaginase	Asrgl1	68	8	1.271	0.542031	937688	1.53098e+06	2.88085e+06	1.84305e+06	2.36102e+06	1.94512e+06
O70492	Sorting nexin-3	Snx3	8	2	1.27	0.598335	75862.7	218507	135618	187869	172246	125304
Q8R191	Synaptogyrin-3	Syngr3	30	3	1.27	0.330662	1.24563e+06	1.7292e+06	1.37187e+06	1.85527e+06	1.40365e+06	1.74238e+06
Q8CHC4	Synaptojanin-1	Synj1	110	16	1.269	0.327936	1.9564e+06	2.61972e+06	1.9171e+06	2.48384e+06	2.34853e+06	2.4819e+06
Q6ZWU9	40S ribosomal protein S27	Rps27	2	1	1.268	0.0558144	208313	181997	182883	247751	231815	208035
Q3UHJ0	AP2-associated protein kinase 1	Aak1	23	7	1.265	0.594186	190979	360277	191954	235737	242902	358183
P17182	Alpha-enolase	Eno1	265	19	1.264	0.427444	2.34718e+07	2.99719e+07	2.17074e+07	2.96738e+07	2.33833e+07	3.12004e+07
P15105	Glutamine synthetase	Glul	252	17	1.263	0.0985133	2.02455e+07	2.075e+07	2.46671e+07	2.70329e+07	2.4053e+07	2.62017e+07
P62761	Visinin-like protein 1	Vsnl1	40	5	1.262	0.189594	923492	994536	1.25585e+06	1.25496e+06	1.22127e+06	1.28882e+06
P35278	Ras-related protein Rab-5C	Rab5c	25	1	1.26	0.308423	92282	99452.6	131656	135427	125359	111372
Q8VEM8	Phosphate carrier protein, mitochondrial	Slc25a3	75	9	1.259	0.201635	2.83722e+06	3.41456e+06	2.41558e+06	3.58561e+06	3.15827e+06	3.57273e+06
P62281	40S ribosomal protein S11	Rps11	11	3	1.258	0.0163305	377169	406474	381824	480277	451395	519375
O88342	WD repeat-containing protein 1	Wdr1	111	11	1.257	0.171372	4.83253e+06	6.01131e+06	4.51362e+06	6.2336e+06	5.91903e+06	6.07263e+06
P62908	40S ribosomal protein S3	Rps3	40	4	1.255	0.137079	321462	490438	454933	571060	557630	576174
P62855	40S ribosomal protein S26	Rps26	1	1	1.254	0.085752	147707	172343	142327	182671	185166	186590
P19096	Fatty acid synthase	Fasn	17	4	1.253	0.685393	157134	223021	116593	196915	137984	202338
O70423	Membrane primary amine oxidase	Aoc3	59	11	1.253	0.286607	1.15478e+06	1.64171e+06	1.93287e+06	1.50845e+06	3.11216e+06	2.05673e+06
P47911	60S ribosomal protein L6	Rpl6	19	2	1.252	0.0479209	413078	427515	412914	580067	517090	480780
P14115	60S ribosomal protein L27a	Rpl27a	2	1	1.251	0.147892	152506	211810	175815	202014	219908	238252
Q8CGY8	UDP-N-acetylglucosamine--peptide N-acetylglucosaminyltransferase 110 kDa subunit	Ogt	5	2	1.251	0.348074	130805	157834	19227.5	163602	146988	191644
G5E829	Plasma membrane calcium-transporting ATPase 1	Atp2b1	273	15	1.249	0.415683	7.65656e+06	9.60218e+06	7.40181e+06	9.56561e+06	7.88959e+06	9.59023e+06
P56399	Ubiquitin carboxyl-terminal hydrolase 5	Usp5	14	7	1.249	0.719474	569895	895279	567998	711689	426478	730354
P14873	Microtubule-associated protein 1B	Map1b	100	14	1.246	0.833911	1.75201e+06	2.17559e+06	1.81769e+06	2.2934e+06	2.26543e+06	1.48635e+06
P63318	Protein kinase C gamma type	Prkcg	142	17	1.246	0.212194	3.5415e+06	4.29414e+06	3.44435e+06	4.41351e+06	3.84422e+06	4.57597e+06
P45878	Peptidyl-prolyl cis-trans isomerase FKBP2	Fkbp2	3	1	1.246	0.581649	42537.8	75712.4	42083.4	52981.1	75218.8	51638.9
O88485	Cytoplasmic dynein 1 intermediate chain 1	Dync1i1	1	1	1.245	0.807818	86413.7	79905.5	58485.6	49989.3	99498.6	99794.6
O89053	Coronin-1A	Coro1a	84	9	1.245	0.758169	1.45715e+06	2.10542e+06	1.54939e+06	1.9737e+06	1.44995e+06	1.9289e+06
O35643	AP-1 complex subunit beta-1	Ap1b1	101	4	1.245	0.153866	428962	594205	551447	704572	560765	686351
O55131	Septin-7	Septin7	85	10	1.241	0.324286	1.58404e+06	2.25837e+06	1.96945e+06	2.52927e+06	1.84773e+06	2.44371e+06
Q5M8N0	CB1 cannabinoid receptor-interacting protein 1	Cnrip1	57	4	1.241	0.0711737	1.55572e+06	1.89832e+06	1.71752e+06	2.47391e+06	1.92397e+06	2.13105e+06
P63001	Ras-related C3 botulinum toxin substrate 1	Rac1	61	6	1.238	0.0116287	6.64867e+06	7.19881e+06	7.01679e+06	8.76631e+06	7.89693e+06	8.68694e+06
Q9WV92	Band 4.1-like protein 3	Epb41l3	123	16	1.237	0.257007	1.83332e+06	2.76954e+06	2.27568e+06	3.00106e+06	2.81514e+06	2.40667e+06
Q9DC70	NADH dehydrogenase	Ndufs7	7	2	1.236	0.392738	360411	527564	158934	564341	445368	381913
Q9QVP9	Protein-tyrosine kinase 2-beta	Ptk2b	24	6	1.236	0.621987	492997	614197	433346	641002	433878	609197
P51863	V-type proton ATPase subunit d 1	Atp6v0d1	65	8	1.235	0.942785	2.08347e+06	3.11696e+06	1.91027e+06	2.57262e+06	1.92197e+06	2.61621e+06
O88322	Nidogen-2	Nid2	16	1	1.234	0.352136	140307	63179.3	153732	122802	173167	179932
P52503	NADH dehydrogenase	Ndufs6	4	2	1.233	0.532336	85994.9	84413.6	143112	106040	116613	31948.8
Q64436	Potassium-transporting ATPase alpha chain 1	Atp4a	150	2	1.233	0.250391	1.98417e+06	2.34858e+06	1.85115e+06	2.61342e+06	2.0391e+06	2.44659e+06
P70168	Importin subunit beta-1	Kpnb1	6	3	1.233	0.726593	165220	260855	76224.6	203644	102394	263997
Q6PIC6	Sodium/potassium-transporting ATPase subunit alpha-3	Atp1a3	1099	28	1.23	0.596001	1.0106e+08	1.30603e+08	1.02358e+08	1.25877e+08	1.02672e+08	1.25947e+08
P62814	V-type proton ATPase subunit B, brain isoform	Atp6v1b2	172	16	1.227	0.944423	3.91586e+06	5.65337e+06	3.35727e+06	4.85876e+06	3.03265e+06	4.80392e+06
P84091	AP-2 complex subunit mu	Ap2m1	138	15	1.226	0.106549	5.60508e+06	7.25429e+06	6.01278e+06	8.59558e+06	7.11966e+06	7.37319e+06
P47963	60S ribosomal protein L13	Rpl13	20	3	1.224	0.335651	199958	269422	103765	287736	229391	244702
Q9QYJ0	DnaJ homolog subfamily A member 2	Dnaja2	2	1	1.223	0.630807	20628.4	38923	55302.4	32337.9	48057.7	47620.2
P28474	Alcohol dehydrogenase class-3	Adh5	7	2	1.223	0.212673	231858	278952	236967	251158	300557	289847
P61255	60S ribosomal protein L26	Rpl26	13	2	1.221	0.144254	152823	191189	212558	234180	222464	233404
P53994	Ras-related protein Rab-2A	Rab2a	55	5	1.22	0.0686382	1.82396e+06	2.09695e+06	1.701e+06	2.38913e+06	2.22537e+06	2.2244e+06
O54983	Ketimine reductase mu-crystallin	Crym	55	9	1.22	0.57562	1.94289e+06	2.64098e+06	1.66306e+06	2.58543e+06	1.8886e+06	2.36981e+06
Q61885	Myelin-oligodendrocyte glycoprotein	Mog	56	3	1.217	0.160667	1.54613e+06	1.49909e+06	1.47489e+06	1.52011e+06	1.82483e+06	1.85055e+06
P17710	Hexokinase-1	Hk1	306	30	1.214	0.924233	1.25267e+07	1.78383e+07	1.10153e+07	1.57582e+07	1.08731e+07	1.52042e+07
E9PZ19	Protein turtle homolog B	Igsf9b	1	1	1.213	0.197848	35498.4	47651.3	59440	57812.8	114766	56710.6
P13707	Glycerol-3-phosphate dehydrogenase	Gpd1	18	3	1.213	0.86756	422715	570822	414797	512725	395866	531040
Q8C0L0	Thioredoxin-related transmembrane protein 4	Tmx4	9	2	1.213	0.330403	102804	21774.4	94870.4	117512	115065	108130
P68040	Receptor of activated protein C kinase 1	Rack1	56	8	1.212	0.0844247	1.66145e+06	1.89354e+06	1.38657e+06	2.01395e+06	2.39766e+06	1.97408e+06
P47857	ATP-dependent 6-phosphofructokinase, muscle type	Pfkm	94	12	1.212	0.733518	3.46318e+06	5.07463e+06	3.7879e+06	4.5898e+06	3.50921e+06	4.89266e+06
P62245	40S ribosomal protein S15a	Rps15a	36	3	1.207	0.0657385	855639	986420	823846	999764	1.03266e+06	1.16752e+06
P63082	V-type proton ATPase 16 kDa proteolipid subunit c	Atp6v0c	13	1	1.207	0.30193	471487	489442	48203.4	832408	553941	568850
P40124	Adenylyl cyclase-associated protein 1	Cap1	52	5	1.203	0.183901	799395	1.00207e+06	858431	1.06343e+06	1.03277e+06	928041
P62881	Guanine nucleotide-binding protein subunit beta-5	Gnb5	4	1	1.203	0.306699	103459	166796	132032	195208	135904	158803
P31648	Sodium- and chloride-dependent GABA transporter 1	Slc6a1	33	4	1.203	0.141665	1.45851e+06	1.72583e+06	1.45181e+06	1.74803e+06	1.75407e+06	1.78048e+06
Q9DCJ5	NADH dehydrogenase	Ndufa8	7	2	1.202	0.283289	261361	324686	227724	305114	316060	314089
P50396	Rab GDP dissociation inhibitor alpha	Gdi1	192	13	1.202	0.797552	7.05143e+06	9.80778e+06	7.02855e+06	8.97322e+06	7.12704e+06	8.47272e+06
P61079	Ubiquitin-conjugating enzyme E2 D3	Ube2d3	10	2	1.201	0.287788	271012	325770	163176	356668	300582	325497
Q8VEH3	ADP-ribosylation factor-like protein 8A	Arl8a	15	1	1.201	0.318973	351050	316728	417466	421567	350251	469586
Q9DC07	LIM zinc-binding domain-containing Nebulette	Nebl	12	1	1.198	0.70979	116372	144917	258007	173623	202967	168318
F6SEU4	Ras/Rap GTPase-activating protein SynGAP	Syngap1	21	3	1.198	0.972651	290912	406772	256520	348567	254685	348493
P12367	cAMP-dependent protein kinase type II-alpha regulatory subunit	Prkar2a	28	1	1.198	0.944988	97348.4	154302	82227.6	118723	84991.3	116605
P56135	ATP synthase subunit f, mitochondrial	Atp5mf	15	1	1.197	0.955791	714717	905480	680944	855345	590984	896809
Q5DU25	IQ motif and SEC7 domain-containing protein 2	Iqsec2	5	1	1.197	0.929394	102835	135368	101515	181674	68975.4	123048
P62880	Guanine nucleotide-binding protein G(I)/G(S)/G(T) subunit beta-2	Gnb2	126	4	1.195	0.730104	1.9821e+06	2.48794e+06	2.11131e+06	2.52359e+06	1.61026e+06	3.31195e+06
Q9D6F9	Tubulin beta-4A chain	Tubb4a	1137	6	1.195	0.635676	5.3744e+06	6.78657e+06	5.12557e+06	6.42072e+06	5.2458e+06	6.60622e+06
O35215	D-dopachrome decarboxylase	Ddt	13	2	1.195	0.91551	159645	188157	245143	224759	247373	121262
P10649	Glutathione S-transferase Mu 1	Gstm1	103	10	1.194	0.905146	3.29044e+06	4.3555e+06	3.25995e+06	3.92817e+06	2.84134e+06	3.96098e+06
Q9QYC0	Alpha-adducin	Add1	45	7	1.194	0.700802	1.44609e+06	1.99005e+06	1.48165e+06	1.97455e+06	1.44728e+06	1.76863e+06
P19536	Cytochrome c oxidase subunit 5B, mitochondrial	Cox5b	3	1	1.193	0.230714	120666	110490	119781	194545	142941	118863
P10630	Eukaryotic initiation factor 4A-II	Eif4a2	34	3	1.193	0.74398	1.26256e+06	1.64156e+06	1.21638e+06	1.57523e+06	1.21091e+06	1.50657e+06
P61027	Ras-related protein Rab-10	Rab10	35	3	1.193	0.0689178	1.21094e+06	1.38244e+06	1.14788e+06	1.59784e+06	1.40286e+06	1.44473e+06
Q9DBG3	AP-2 complex subunit beta	Ap2b1	158	10	1.19	0.769151	6.15838e+06	8.30833e+06	5.31662e+06	7.34709e+06	5.84117e+06	7.33095e+06
P05063	Fructose-bisphosphate aldolase C	Aldoc	221	13	1.19	0.879112	5.04681e+06	6.593e+06	3.97317e+06	6.00546e+06	4.0098e+06	6.04976e+06
P97807	Fumarate hydratase, mitochondrial	Fh	11	3	1.19	0.952204	98231.6	131726	96332.1	116871	92285.4	118486
Q5SQX6	Cytoplasmic FMR1-interacting protein 2	Cyfip2	78	9	1.189	0.7823	757043	998035	613758	936120	647643	899882
Q99KI0	Aconitate hydratase, mitochondrial	Aco2	313	27	1.188	0.884576	1.54557e+07	2.12052e+07	1.53875e+07	1.83644e+07	1.32709e+07	1.92313e+07
P99024	Tubulin beta-5 chain	Tubb5	1332	5	1.184	0.393335	1.76822e+07	2.23439e+07	1.70626e+07	2.09388e+07	1.88046e+07	2.31313e+07
Q9QZX7	Serine racemase	Srr	8	2	1.183	0.355214	47433.5	74457.5	53070.3	82812.8	61182.8	62789.2
P16125	L-lactate dehydrogenase B chain	Ldhb	143	11	1.182	0.561943	1.40357e+07	1.91999e+07	1.50356e+07	1.7775e+07	1.49014e+07	1.92862e+07
Q91V12	Cytosolic acyl coenzyme A thioester hydrolase	Acot7	97	9	1.182	0.256928	3.49536e+06	4.46761e+06	3.4209e+06	4.13156e+06	4.85417e+06	4.04778e+06
Q80TL0	Protein phosphatase 1E	Ppm1e	13	2	1.182	0.836528	168312	254063	151227	198899	201130	180902
P11983	T-complex protein 1 subunit alpha	Tcp1	34	7	1.181	0.775147	417463	590531	425953	503172	442458	530358
P39053	Dynamin-1	Dnm1	396	25	1.18	0.985561	1.99955e+07	2.73423e+07	1.87144e+07	2.43796e+07	1.76239e+07	2.35993e+07
Q60931	Voltage-dependent anion-selective channel protein 3	Vdac3	129	9	1.179	0.198783	1.02129e+07	1.4335e+07	1.25736e+07	1.52554e+07	1.41379e+07	1.48254e+07
P07724	Albumin	Alb	335	28	1.179	0.0286395	2.56932e+07	2.23016e+07	2.44905e+07	3.31947e+07	2.83605e+07	2.88738e+07
Q9CQW1	Synaptobrevin homolog YKT6	Ykt6	4	1	1.179	0.213419	127409	203015	187927	215385	221562	221751
Q9WUM4	Coronin-1C	Coro1c	24	4	1.175	0.605703	461469	588097	406328	596405	434199	542027
P48962	ADP/ATP translocase 1	Slc25a4	385	10	1.173	0.152966	3.88244e+07	4.81449e+07	4.15535e+07	5.08373e+07	4.73553e+07	4.87575e+07
Q8BG05	Heterogeneous nuclear ribonucleoprotein A3	Hnrnpa3	18	2	1.173	0.596827	164470	177972	195654	231794	208748	151537
Q99JY9	Actin-related protein 3	Actr3	36	6	1.173	0.906658	534815	790530	563671	660952	502938	676306
Q7TQI3	Ubiquitin thioesterase OTUB1	Otub1	24	5	1.173	0.50971	602782	857202	665127	801957	709510	779900
P68510	14-3-3 protein eta	Ywhah	125	8	1.172	0.0369268	2.28648e+06	2.2891e+06	2.0226e+06	2.68877e+06	2.60586e+06	2.6804e+06
Q8C419	Probable G-protein coupled receptor 158	Gpr158	8	4	1.172	0.170501	3.57506e+06	2.73421e+06	3.5307e+06	4.13623e+06	3.55801e+06	5.95076e+06
P70296	Phosphatidylethanolamine-binding protein 1	Pebp1	30	4	1.171	0.395329	1.0074e+06	1.27917e+06	602342	1.17989e+06	1.23878e+06	1.08689e+06
P17427	AP-2 complex subunit alpha-2	Ap2a2	222	13	1.171	0.983857	3.0077e+06	4.68908e+06	2.55746e+06	3.71723e+06	2.79157e+06	3.52244e+06
Q60932	Voltage-dependent anion-selective channel protein 1	Vdac1	189	15	1.17	0.342465	1.8341e+07	2.46327e+07	2.13395e+07	2.78064e+07	2.06071e+07	2.49613e+07
Q791V5	Mitochondrial carrier homolog 2	Mtch2	43	5	1.169	0.117078	1.04412e+06	1.27866e+06	1.14263e+06	1.39415e+06	1.26201e+06	1.33613e+06
Q80SW1	S-adenosylhomocysteine hydrolase-like protein 1	Ahcyl1	31	5	1.167	0.536418	1.33893e+06	853232	719162	962133	995906	1.33259e+06
Q9ERD7	Tubulin beta-3 chain	Tubb3	953	11	1.165	0.611732	1.03082e+07	1.34454e+07	7.84104e+06	1.20065e+07	9.83917e+06	1.23209e+07
Q9CQD1	Ras-related protein Rab-5A	Rab5a	23	2	1.161	0.390848	294014	467461	568729	496377	542712	549041
P46460	Vesicle-fusing ATPase	Nsf	317	34	1.16	0.751073	1.66431e+07	2.16618e+07	1.35727e+07	1.93109e+07	1.53256e+07	1.94429e+07
P84099	60S ribosomal protein L19	Rpl19	2	1	1.16	0.114293	95031.9	109496	98116	119947	113825	105549
Q61792	LIM and SH3 domain protein 1	Lasp1	70	8	1.16	0.842583	1.66635e+06	1.89668e+06	3.10157e+06	2.35848e+06	2.19997e+06	2.1488e+06
Q920I9	WD repeat-containing protein 7	Wdr7	5	2	1.159	0.631392	194427	228283	153912	225413	165762	233825
P26040	Ezrin	Ezr	17	2	1.159	0.308863	703362	812659	421762	908669	727677	815311
Q9JII6	Aldo-keto reductase family 1 member A1	Akr1a1	6	2	1.159	0.427633	155191	210727	33718.9	179798	146104	226199
Q03265	ATP synthase subunit alpha, mitochondrial	Atp5f1a	432	25	1.158	0.527594	3.71345e+07	5.26449e+07	4.29865e+07	4.97678e+07	4.22512e+07	5.12749e+07
Q7TMM9	Tubulin beta-2A chain	Tubb2a	1518	2	1.156	0.417912	2.00288e+08	2.41897e+08	1.72222e+08	2.31612e+08	2.0363e+08	2.41559e+08
Q8K0U4	Heat shock 70 kDa protein 12A	Hspa12a	71	11	1.156	0.401351	2.13791e+06	2.70243e+06	1.63914e+06	2.47137e+06	2.4016e+06	2.52253e+06
P51881	ADP/ATP translocase 2	Slc25a5	310	6	1.155	0.171178	5.54991e+06	5.61359e+06	3.35799e+06	6.40897e+06	7.34013e+06	6.25553e+06
Q7TQD2	Tubulin polymerization-promoting protein	Tppp	98	7	1.155	0.486919	4.73034e+06	7.82101e+06	9.78509e+06	9.06189e+06	7.66484e+06	9.0305e+06
Q925N0	Sideroflexin-5	Sfxn5	5	1	1.154	0.851474	90396.2	220966	48292.5	65480.4	105542	104304
Q920P5	Adenylate kinase isoenzyme 5	Ak5	4	2	1.153	0.641086	77773.8	134958	19983.7	92750.1	64174.8	89696.2
P28652	Calcium/calmodulin-dependent protein kinase type II subunit beta	Camk2b	195	10	1.153	0.869387	2.65506e+06	3.64343e+06	2.61815e+06	4.07213e+06	2.26108e+06	3.06136e+06
O08709	Peroxiredoxin-6	Prdx6	111	10	1.153	0.494451	2.97296e+06	4.15832e+06	3.25695e+06	4.08179e+06	3.41488e+06	3.75487e+06
P68368	Tubulin alpha-4A chain	Tuba4a	779	7	1.153	0.860601	1.92307e+07	2.89795e+07	1.73007e+07	2.21663e+07	1.82909e+07	2.64858e+07
Q9CQC7	NADH dehydrogenase	Ndufb4	15	4	1.152	0.0844343	352114	342324	396293	479543	405474	404971
P11499	Heat shock protein HSP 90-beta	Hsp90ab1	245	13	1.15	0.931688	1.0546e+07	1.43208e+07	9.36721e+06	1.2333e+07	9.8521e+06	1.21242e+07
P16092	Fibroblast growth factor receptor 1	Fgfr1	15	1	1.149	0.198075	306476	429145	370264	465147	425577	422823
Q9CR68	Cytochrome b-c1 complex subunit Rieske, mitochondrial	Uqcrfs1	50	4	1.149	0.450575	1.2648e+06	1.58774e+06	1.99257e+06	1.8563e+06	1.70649e+06	1.82367e+06
P48722	Heat shock 70 kDa protein 4L	Hspa4l	24	7	1.148	0.6127	401618	518413	365724	496702	406456	461122
P27600	Guanine nucleotide-binding protein subunit alpha-12	Gna12	32	1	1.148	0.0883295	3.71921e+06	4.59223e+06	4.33003e+06	5.24839e+06	4.96976e+06	4.91738e+06
Q6ZWX6	Eukaryotic translation initiation factor 2 subunit 1	Eif2s1	6	1	1.147	0.256155	63773.3	70616.5	60060.6	73160.9	91280.7	64839.5
P18872	Guanine nucleotide-binding protein G(o) subunit alpha	Gnao1	211	11	1.147	0.477298	1.48995e+07	1.9868e+07	1.74593e+07	2.04091e+07	1.63607e+07	2.00188e+07
Q9CWS0	N(G),N(G)-dimethylarginine dimethylaminohydrolase 1	Ddah1	11	2	1.146	0.786042	233379	374318	180149	267502	144006	309755
Q9JHU4	Cytoplasmic dynein 1 heavy chain 1	Dync1h1	78	18	1.146	0.738806	1.33158e+06	1.91496e+06	923696	1.66389e+06	1.19866e+06	1.52583e+06
P70404	Isocitrate dehydrogenase	Idh3g	39	6	1.146	0.988355	936586	1.4443e+06	913523	1.073e+06	811106	1.40555e+06
Q60930	Voltage-dependent anion-selective channel protein 2	Vdac2	122	10	1.145	0.155766	1.21794e+07	1.64478e+07	1.6608e+07	1.88257e+07	1.91876e+07	1.79776e+07
P28663	Beta-soluble NSF attachment protein	Napb	61	11	1.144	0.862727	1.80462e+06	2.45286e+06	1.89127e+06	2.25583e+06	1.58145e+06	2.16295e+06
Q920N2	Biotin--protein ligase	Hlcs	54	8	1.143	0.761446	1.22308e+06	1.83905e+06	1.15521e+06	1.43796e+06	1.39844e+06	1.09133e+06
Q61990	Poly(rC)-binding protein 2	Pcbp2	46	3	1.143	0.805529	706091	606641	569040	761976	383605	693088
O08749	Dihydrolipoyl dehydrogenase, mitochondrial	Dld	73	8	1.142	0.622269	1.71578e+06	2.43054e+06	1.84898e+06	2.06456e+06	2.12406e+06	2.11234e+06
Q3U2K0	Protein FAM193B	Fam193b	5	1	1.142	0.861134	165585	206479	152723	189156	141319	212687
Q571E4	N-acetylgalactosamine-6-sulfatase	Galns	5	1	1.142	0.510984	38206.1	34134.6	50152.4	50042.4	40075.9	43627.2
P14094	Sodium/potassium-transporting ATPase subunit beta-1	Atp1b1	152	8	1.141	0.287353	2.30786e+07	2.71484e+07	2.28456e+07	2.63263e+07	2.45295e+07	2.94396e+07
Q8K0S0	Phytanoyl-CoA hydroxylase-interacting protein	Phyhip	63	5	1.14	0.453023	1.45089e+06	1.66959e+06	1.4037e+06	1.67157e+06	1.46017e+06	1.65415e+06
Q9CZB0	Succinate dehydrogenase cytochrome b560 subunit, mitochondrial	Sdhc	2	1	1.139	0.752667	94822.3	179938	110057	125357	78020	146019
Q61171	Peroxiredoxin-2	Prdx2	157	10	1.139	0.286577	1.56996e+07	1.98396e+07	2.29607e+07	2.34526e+07	2.17258e+07	2.25907e+07
Q61598	Rab GDP dissociation inhibitor beta	Gdi2	111	5	1.138	0.58748	1.5494e+06	2.0034e+06	1.3881e+06	1.76394e+06	1.54305e+06	2.00522e+06
Q8CI94	Glycogen phosphorylase, brain form	Pygb	124	13	1.138	0.906227	2.69316e+06	3.79834e+06	2.22233e+06	3.11814e+06	2.54069e+06	3.06508e+06
P32037	Solute carrier family 2, facilitated glucose transporter member 3	Slc2a3	14	2	1.137	0.107859	1.076e+06	1.17939e+06	1.12601e+06	1.57342e+06	1.25242e+06	1.28021e+06
Q9CWZ7	Gamma-soluble NSF attachment protein	Napg	6	1	1.135	0.179614	312213	300831	326775	354355	315523	384584
P14152	Malate dehydrogenase, cytoplasmic	Mdh1	168	11	1.134	0.963479	1.24853e+07	1.76925e+07	1.32065e+07	1.58316e+07	1.25405e+07	1.49761e+07
P09411	Phosphoglycerate kinase 1	Pgk1	137	12	1.132	0.761094	1.34973e+07	1.62176e+07	1.18668e+07	1.5285e+07	1.17477e+07	1.65497e+07
P97427	Dihydropyrimidinase-related protein 1	Crmp1	219	9	1.131	0.0810938	3.22227e+06	3.74257e+06	3.36792e+06	4.29797e+06	3.78553e+06	3.80996e+06
O35098	Dihydropyrimidinase-related protein 4	Dpysl4	17	5	1.131	0.831119	682579	919437	525358	771762	460064	788665
Q04857	Collagen alpha-1(VI) chain	Col6a1	7	2	1.13	0.583767	105551	24351.3	66902.6	56877.1	94653.5	75601.2
Q9Z2H5	Band 4.1-like protein 1	Epb41l1	46	7	1.13	0.288523	1.01251e+06	1.30494e+06	1.12131e+06	1.26706e+06	1.32566e+06	1.20866e+06
Q91VR2	ATP synthase subunit gamma, mitochondrial	Atp5f1c	21	5	1.129	0.946289	829379	1.279e+06	780084	1.09397e+06	775911	936519
O08553	Dihydropyrimidinase-related protein 2	Dpysl2	542	22	1.129	0.862399	3.01452e+07	4.46096e+07	3.17869e+07	3.58772e+07	3.06893e+07	3.59731e+07
P48774	Glutathione S-transferase Mu 5	Gstm5	58	5	1.128	0.855	898354	1.28387e+06	872911	1.16777e+06	768362	1.01315e+06
Q9DCS9	NADH dehydrogenase	Ndufb10	20	4	1.127	0.364813	242468	258534	128818	286040	273343	225120
P48453	Serine/threonine-protein phosphatase 2B catalytic subunit beta isoform	Ppp3cb	106	1	1.126	0.984497	177216	278971	185981	209353	185769	234044
Q9CR95	Adaptin ear-binding coat-associated protein 1	Necap1	32	4	1.125	0.133933	300421	408610	388680	501620	420087	437422
Q9D8N0	Elongation factor 1-gamma	Eef1g	29	4	1.125	0.70173	904432	1.1726e+06	941728	1.05973e+06	920413	1.16769e+06
P51410	60S ribosomal protein L9	Rpl9	8	2	1.125	0.06999	238391	275133	290115	346150	309588	306672
P68369	Tubulin alpha-1A chain	Tuba1a	894	8	1.124	0.893844	1.8423e+08	2.47451e+08	1.75161e+08	2.07108e+08	1.72714e+08	2.3715e+08
P42932	T-complex protein 1 subunit theta	Cct8	21	5	1.122	0.975763	621773	909853	537556	697397	534512	800335
Q9D1P4	Cysteine and histidine-rich domain-containing protein 1	Chordc1	8	2	1.122	0.0815902	211151	228651	206316	229778	262410	236822
P00405	Cytochrome c oxidase subunit 2	Mtco2	48	4	1.121	0.749511	3.28073e+06	5.29976e+06	2.58981e+06	3.94904e+06	2.35759e+06	3.6788e+06
P61205	ADP-ribosylation factor 3	Arf3	105	9	1.12	0.11648	4.55226e+06	6.12939e+06	6.14762e+06	6.86409e+06	8.69194e+06	6.45676e+06
Q68FD5	Clathrin heavy chain 1	Cltc	716	62	1.12	0.753008	3.81102e+07	4.75829e+07	2.86729e+07	4.26749e+07	3.31896e+07	4.37587e+07
Q62425	Cytochrome c oxidase subunit NDUFA4	Ndufa4	35	3	1.117	0.0763011	1.90507e+06	2.2918e+06	2.138e+06	2.78544e+06	2.38828e+06	2.38683e+06
Q8VHW2	Voltage-dependent calcium channel gamma-8 subunit	Cacng8	35	3	1.117	0.0798113	838555	769641	822188	918097	981292	849565
P63005	Platelet-activating factor acetylhydrolase IB subunit beta	Pafah1b1	32	4	1.117	0.269959	600207	985412	861606	937928	1.09801e+06	962019
Q9DB05	Alpha-soluble NSF attachment protein	Napa	21	2	1.116	0.838689	163013	200659	161346	197827	133824	181923
P35505	Fumarylacetoacetase	Fah	43	5	1.115	0.264535	416259	613564	673754	748991	684311	657952
Q9CQI6	Coactosin-like protein	Cotl1	25	4	1.114	0.92414	358866	562819	427481	486300	476011	390545
P68372	Tubulin beta-4B chain	Tubb4b	1305	1	1.113	0.575049	9.87337e+06	1.26653e+07	9.76914e+06	1.09909e+07	1.01241e+07	1.3829e+07
P56564	Excitatory amino acid transporter 1	Slc1a3	59	6	1.112	0.387088	5.15277e+06	7.23322e+06	6.00245e+06	7.10332e+06	6.52032e+06	6.67602e+06
Q60900	ELAV-like protein 3	Elavl3	12	2	1.111	0.105368	173116	184617	172043	192380	184470	211143
Q9WV60	Glycogen synthase kinase-3 beta	Gsk3b	16	3	1.111	0.919274	207538	304489	218419	284928	209572	242660
Q61699	Heat shock protein 105 kDa	Hsph1	36	6	1.11	0.956493	447456	684361	428164	566886	452117	496827
P62141	Serine/threonine-protein phosphatase PP1-beta catalytic subunit	Ppp1cb	53	3	1.107	0.429273	449576	452514	640182	24289.8	500944	530226
P10126	Elongation factor 1-alpha 1	Eef1a1	202	7	1.106	0.788455	2.44925e+07	2.99843e+07	2.46454e+07	2.85609e+07	2.48757e+07	2.72654e+07
E9Q912	Rap1 GTPase-GDP dissociation stimulator 1	Rap1gds1	23	5	1.105	0.748426	271817	347633	251150	300409	204262	323160
Q99PT1	Rho GDP-dissociation inhibitor 1	Arhgdia	77	5	1.105	0.0870042	4.78199e+06	4.53086e+06	4.76611e+06	5.26442e+06	5.84914e+06	5.00252e+06
Q9D8B7	Junctional adhesion molecule C	Jam3	21	2	1.104	0.392121	297181	210449	239215	264176	244094	377317
Q91XM9	Disks large homolog 2	Dlg2	13	3	1.104	0.727926	157758	213047	159094	208252	167212	175685
Q62277	Synaptophysin	Syp	45	3	1.103	0.926197	5.55596e+06	7.04228e+06	5.78348e+06	6.37929e+06	4.93024e+06	6.92995e+06
Q9WV55	Vesicle-associated membrane protein-associated protein A	Vapa	11	2	1.103	0.508528	372676	454429	282766	447255	366129	410939
P62259	14-3-3 protein epsilon	Ywhae	171	12	1.103	0.567581	3.96103e+06	5.22981e+06	4.48208e+06	5.25535e+06	4.31055e+06	4.94197e+06
Q91YT0	NADH dehydrogenase	Ndufv1	25	5	1.102	0.697433	621909	879672	661006	773768	523471	728660
P62830	60S ribosomal protein L23	Rpl23	5	1	1.102	0.616282	217164	232256	291778	256002	224556	319818
P33175	Kinesin heavy chain isoform 5A	Kif5a	13	2	1.102	0.929296	99824.6	114187	95209	81085.3	109969	117330
Q9DB20	ATP synthase subunit O, mitochondrial	Atp5po	34	4	1.101	0.817649	2.33014e+06	2.59726e+06	2.40527e+06	2.64719e+06	2.08018e+06	2.85676e+06
Q64521	Glycerol-3-phosphate dehydrogenase, mitochondrial	Gpd2	30	5	1.1	0.583662	397773	678216	503847	725538	554143	480603
P53986	Monocarboxylate transporter 1	Slc16a1	7	1	1.1	0.34896	119726	116854	110436	128922	111491	128487
P62320	Small nuclear ribonucleoprotein Sm D3	Snrpd3	1	1	1.099	0.462124	62658.1	77060.3	63532.5	69824	76298.9	69427.7
P16330	2',3'-cyclic-nucleotide 3'-phosphodiesterase	Cnp	401	28	1.097	0.665033	3.90577e+07	4.95306e+07	3.65989e+07	4.07097e+07	4.2837e+07	4.69892e+07
P11798	Calcium/calmodulin-dependent protein kinase type II subunit alpha	Camk2a	336	15	1.097	0.914388	3.56423e+07	4.64918e+07	3.23964e+07	3.90818e+07	3.09065e+07	4.23063e+07
Q8BGT8	Phytanoyl-CoA hydroxylase-interacting protein-like	Phyhipl	71	4	1.096	0.292012	643692	744376	666070	729703	693759	766529
Q8CAQ8	MICOS complex subunit Mic60	Immt	78	12	1.094	0.789458	1.61273e+06	2.19525e+06	1.57676e+06	1.87956e+06	1.5095e+06	1.76505e+06
Q9CQQ7	ATP synthase F(0) complex subunit B1, mitochondrial	Atp5pb	45	4	1.093	0.620552	2.43618e+06	2.95749e+06	2.41977e+06	2.66337e+06	1.94178e+06	2.73372e+06
Q99LX0	Parkinson disease protein 7 homolog	Park7	27	4	1.092	0.74632	779798	851410	742881	858612	583038	851690
P68254	14-3-3 protein theta	Ywhaq	163	8	1.091	0.608575	1.03992e+06	997659	1.29799e+06	1.1346e+06	1.11113e+06	1.24577e+06
P20917	Myelin-associated glycoprotein	Mag	117	11	1.09	0.79348	5.19027e+06	4.64741e+06	4.79451e+06	4.09687e+06	5.2281e+06	5.97491e+06
Q9JLZ3	Methylglutaconyl-CoA hydratase, mitochondrial	Auh	3	2	1.09	0.924185	88722.5	165949	113516	124803	101792	123770
O08599	Syntaxin-binding protein 1	Stxbp1	216	21	1.09	0.825151	1.59956e+07	2.49932e+07	1.94883e+07	2.12471e+07	1.73178e+07	2.37058e+07
Q99JR1	Sideroflexin-1	Sfxn1	11	3	1.089	0.441351	283145	440251	363656	572660	336688	395912
Q9D6J5	NADH dehydrogenase	Ndufb8	8	1	1.089	0.375568	231738	249422	211594	226916	252285	256818
P28660	Nck-associated protein 1	Nckap1	9	3	1.089	0.868998	152037	240731	153335	166926	140618	215546
P50518	V-type proton ATPase subunit E 1	Atp6v1e1	28	2	1.088	0.539197	948360	987220	1.22032e+06	1.07409e+06	1.03073e+06	1.26253e+06
Q9R0Y5	Adenylate kinase isoenzyme 1	Ak1	19	2	1.086	0.184016	422317	556892	544940	638640	591754	567271
Q04447	Creatine kinase B-type	Ckb	266	18	1.083	0.677972	2.40731e+07	3.14895e+07	2.32158e+07	2.60811e+07	2.17045e+07	2.65728e+07
P80315	T-complex protein 1 subunit delta	Cct4	19	4	1.08	0.890632	459076	594180	389933	495986	370340	538066
Q8VDQ8	NAD-dependent protein deacetylase sirtuin-2	Sirt2	93	13	1.08	0.738953	3.03666e+06	4.27349e+06	3.51435e+06	3.31956e+06	3.79636e+06	4.10875e+06
Q8VDN2	Sodium/potassium-transporting ATPase subunit alpha-1	Atp1a1	674	16	1.08	0.502915	7.92666e+06	9.43299e+06	8.8669e+06	9.57387e+06	7.98859e+06	1.10406e+07
Q9Z0N1	Eukaryotic translation initiation factor 2 subunit 3, X-linked	Eif2s3x	10	1	1.079	0.22968	112013	94125.5	104189	112784	112182	112439
Q9Z2I9	Succinate--CoA ligase	Sucla2	66	7	1.079	0.804799	1.42154e+06	1.9276e+06	1.63065e+06	1.75886e+06	1.45223e+06	1.92549e+06
P10922	Histone H1.0	H1-0	9	1	1.079	0.385328	105675	140764	129696	193682	139879	118110
P09528	Ferritin heavy chain	Fth1	13	1	1.078	0.484446	120992	185293	158036	191738	170365	151828
Q9D1G1	Ras-related protein Rab-1B	Rab1b	24	3	1.077	0.782958	832548	1.21697e+06	892393	1.10692e+06	954011	960922
P07901	Heat shock protein HSP 90-alpha	Hsp90aa1	242	15	1.076	0.902472	6.19097e+06	8.47389e+06	5.06909e+06	6.6601e+06	5.656e+06	7.55836e+06
P02088	Hemoglobin subunit beta-1	Hbb-b1	139	10	1.076	0.777002	1.11882e+07	1.17073e+07	1.41273e+07	1.25916e+07	6.42042e+06	1.7188e+07
Q8R464	Cell adhesion molecule 4	Cadm4	75	8	1.075	0.601196	1.58031e+06	1.25812e+06	2.01132e+06	1.3258e+06	2.75106e+06	1.6983e+06
Q9DC69	NADH dehydrogenase	Ndufa9	48	6	1.073	0.548135	705105	875063	830061	890544	759940	893318
P35762	CD81 antigen	Cd81	18	2	1.071	0.490343	539066	748066	348692	577397	548230	799773
P97300	Neuroplastin	Nptn	108	8	1.071	0.563171	3.83785e+07	5.36453e+07	5.10892e+07	5.4709e+07	4.45677e+07	5.47999e+07
P35979	60S ribosomal protein L12	Rpl12	17	3	1.07	0.644558	604764	878449	609186	697472	652011	577559
Q9QYG0	Protein NDRG2	Ndrg2	27	3	1.069	0.343168	605911	701527	699812	748164	873358	640483
P43277	Histone H1.3	H1-3	53	2	1.067	0.741864	2.25456e+06	2.72077e+06	2.00718e+06	2.40597e+06	2.4207e+06	2.33824e+06
P12382	ATP-dependent 6-phosphofructokinase, liver type	Pfkl	60	5	1.067	0.752373	916102	1.2416e+06	902386	977377	814191	1.12003e+06
P63037	DnaJ homolog subfamily A member 1	Dnaja1	4	1	1.066	0.675135	213071	252992	309687	243305	269676	302253
P28661	Septin-4	Septin4	11	1	1.063	0.951295	722596	1.03085e+06	830095	882669	634141	1.06553e+06
P49312	Heterogeneous nuclear ribonucleoprotein A1	Hnrnpa1	7	2	1.063	0.202893	42797.7	56955.9	58073.6	83174.9	60527	56891.6
P18572	Basigin	Bsg	8	1	1.063	0.684718	189321	238069	210747	255894	117355	223937
Q8C1B7	Septin-11	Septin11	103	7	1.061	0.412423	3.58527e+06	5.1055e+06	5.2685e+06	5.59006e+06	4.70014e+06	5.41579e+06
P62852	40S ribosomal protein S25	Rps25	14	3	1.06	0.803575	491996	581818	762252	614869	641180	617009
Q9CZ13	Cytochrome b-c1 complex subunit 1, mitochondrial	Uqcrc1	91	10	1.059	0.778637	3.59062e+06	4.52614e+06	2.75602e+06	3.80167e+06	2.57983e+06	3.83354e+06
Q8K3H0	DCC-interacting protein 13-alpha	Appl1	8	3	1.058	0.728676	17060.8	36505	27207.3	28786.2	24950.9	30912.1
P52430	Serum paraoxonase/arylesterase 1	Pon1	2	1	1.058	0.4939	54885.9	93436.3	79915.4	84544.9	70967.7	107067
P63085	Mitogen-activated protein kinase 1	Mapk1	61	6	1.058	0.65485	2.29162e+06	3.08088e+06	2.11697e+06	2.42415e+06	2.03008e+06	2.50181e+06
Q6Q477	Plasma membrane calcium-transporting ATPase 4	Atp2b4	114	1	1.058	0.882217	132194	200379	190632	216360	127941	201602
Q9D6M3	Mitochondrial glutamate carrier 1	Slc25a22	69	8	1.057	0.337403	4.18787e+06	5.4746e+06	5.13387e+06	5.67691e+06	5.17441e+06	5.42781e+06
Q9R0P9	Ubiquitin carboxyl-terminal hydrolase isozyme L1	Uchl1	103	10	1.057	0.300084	3.60725e+06	4.53563e+06	4.16976e+06	4.9444e+06	4.21477e+06	4.40783e+06
Q6PHN9	Ras-related protein Rab-35	Rab35	28	3	1.057	0.364743	2.49507e+06	3.1266e+06	3.03957e+06	3.21296e+06	2.92692e+06	3.24689e+06
Q8BK64	Activator of 90 kDa heat shock protein ATPase homolog 1	Ahsa1	12	2	1.056	0.411673	242394	262841	19839	304146	256023	222698
P63168	Dynein light chain 1, cytoplasmic	Dynll1	34	3	1.056	0.192893	1.23526e+06	1.23131e+06	1.04473e+06	1.29967e+06	1.22972e+06	1.35945e+06
P62743	AP-2 complex subunit sigma	Ap2s1	19	2	1.053	0.469145	825489	1.2332e+06	1.1069e+06	1.25299e+06	1.0685e+06	1.16575e+06
Q8K2B3	Succinate dehydrogenase	Sdha	74	14	1.053	0.327103	2.7474e+06	2.99667e+06	2.36626e+06	3.12904e+06	2.8183e+06	2.89197e+06
P50247	Adenosylhomocysteinase	Ahcy	20	2	1.052	0.822556	472226	445917	637878	464634	496832	532873
Q6P1F6	Serine/threonine-protein phosphatase 2A 55 kDa regulatory subunit B alpha isoform	Ppp2r2a	2	2	1.052	0.639615	70740.5	119731	107534	121143	31902	113133
Q9D023	Mitochondrial pyruvate carrier 2	Mpc2	16	3	1.051	0.189503	332431	300495	353369	349452	345974	399146
Q9QYR6	Microtubule-associated protein 1A	Map1a	188	27	1.051	0.88983	3.46873e+06	4.70072e+06	3.84074e+06	4.5687e+06	3.57277e+06	4.03603e+06
Q9CYT6	Adenylyl cyclase-associated protein 2	Cap2	28	3	1.051	0.978781	406038	467493	406389	427012	365384	498774
P62806	Histone H4	H4c1	80	7	1.05	0.762186	7.8313e+06	9.32338e+06	1.13054e+07	9.79197e+06	9.30017e+06	1.01354e+07
Q7TPR4	Alpha-actinin-1	Actn1	39	3	1.05	0.954667	692109	902989	524093	726877	503529	859465
Q922Q4	Pyrroline-5-carboxylate reductase 2	Pycr2	2	2	1.05	0.882344	87250	127922	117332	123207	81595.2	143626
P29341	Polyadenylate-binding protein 1	Pabpc1	8	2	1.05	0.665354	178836	121106	27185.3	127139	74149	152882
Q9R1P0	Proteasome subunit alpha type-4	Psma4	24	2	1.048	0.816525	314136	722621	597714	626143	869783	330483
Q9R1P4	Proteasome subunit alpha type-1	Psma1	3	2	1.047	0.476073	595060	794062	736286	770954	691259	834215
Q7TMF3	NADH dehydrogenase	Ndufa12	24	3	1.047	0.328404	285611	341279	357823	393646	357327	330612
Q9D394	Protein RUFY3	Rufy3	9	3	1.047	0.741191	133022	179106	135004	179502	103824	141296
P47791	Glutathione reductase, mitochondrial	Gsr	12	3	1.045	0.498879	282520	442568	516062	462347	537666	410787
P10107	Annexin A1	Anxa1	2	1	1.044	0.399771	37715.2	44950	118095	25695.6	50050.9	46937.7
P12970	60S ribosomal protein L7a	Rpl7a	8	1	1.043	0.467658	185953	203615	96769	209295	169440	194025
Q62188	Dihydropyrimidinase-related protein 3	Dpysl3	231	9	1.042	0.930976	3.01075e+06	3.8231e+06	3.34934e+06	3.48843e+06	2.97011e+06	3.62705e+06
O35526	Syntaxin-1A	Stx1a	16	2	1.041	0.511336	282781	439494	482436	548676	370059	457420
Q9QYX7	Protein piccolo	Pclo	8	3	1.04	0.692891	32666.4	114676	135805	146397	119273	57813.8
P21278	Guanine nucleotide-binding protein subunit alpha-11	Gna11	5	2	1.039	0.426414	287570	425063	298759	310317	234935	326238
Q61879	Myosin-10	Myh10	13	4	1.038	0.72392	105398	171153	145634	151228	130185	160157
P80313	T-complex protein 1 subunit eta	Cct7	21	4	1.037	0.89087	606107	868964	533193	628777	533555	772766
P61922	4-aminobutyrate aminotransferase, mitochondrial	Abat	33	10	1.037	0.858989	1.04143e+06	1.27157e+06	928491	1.11695e+06	960125	1.0801e+06
Q9DBJ1	Phosphoglycerate mutase 1	Pgam1	130	11	1.036	0.7863	5.94504e+06	7.16918e+06	4.83291e+06	6.15651e+06	4.65549e+06	6.30716e+06
P14824	Annexin A6	Anxa6	7	4	1.035	0.491979	173916	222019	40439.2	208571	157892	179948
P20108	Thioredoxin-dependent peroxide reductase, mitochondrial	Prdx3	37	6	1.034	0.463245	2.57947e+06	3.71508e+06	4.15972e+06	4.2562e+06	3.84135e+06	3.61785e+06
Q3UM45	Protein phosphatase 1 regulatory subunit 7	Ppp1r7	3	1	1.034	0.584884	89096.9	71389	52616.1	73798.9	81324.5	27983.9
P62835	Ras-related protein Rap-1A	Rap1a	33	7	1.033	0.247749	1.4589e+06	1.51991e+06	1.38916e+06	1.49558e+06	1.50775e+06	1.7539e+06
P67984	60S ribosomal protein L22	Rpl22	7	1	1.032	0.64911	186237	190056	210367	196138	189261	218158
P47708	Rabphilin-3A	Rph3a	7	2	1.031	0.641345	275315	300343	333935	382046	276461	309579
Q9CZU6	Citrate synthase, mitochondrial	Cs	50	5	1.031	0.49605	3.2812e+06	4.25997e+06	3.23991e+06	3.38156e+06	2.69672e+06	3.70871e+06
P58252	Elongation factor 2	Eef2	93	11	1.03	0.924228	1.96078e+06	2.53203e+06	1.56929e+06	2.02045e+06	1.70646e+06	2.37911e+06
P62754	40S ribosomal protein S6	Rps6	6	1	1.03	0.340778	210283	219365	206142	231967	211422	216489
P34884	Macrophage migration inhibitory factor	Mif	253	5	1.029	0.964467	5.10645e+07	5.53304e+07	6.30529e+07	5.69448e+07	5.32463e+07	5.93472e+07
P08730	Keratin, type I cytoskeletal 13	Krt13	188	1	1.029	0.873626	74982.2	71205.4	507658	43899.9	487698	77162.5
Q80TZ3	Putative tyrosine-protein phosphatase auxilin	Dnajc6	6	3	1.029	0.696231	338986	400501	286350	408852	348830	317925
Q9R111	Guanine deaminase	Gda	27	8	1.028	0.771537	860431	1.46766e+06	1.02655e+06	1.2021e+06	857873	1.05534e+06
P09671	Superoxide dismutase	Sod2	79	6	1.028	0.895014	3.8547e+06	5.12361e+06	6.83291e+06	5.19429e+06	5.31152e+06	5.26727e+06
Q9JKP5	Muscleblind-like protein 1	Mbnl1	107	1	1.028	0.970303	9.26447e+09	7.33226e+09	7.298e+09	7.53448e+09	7.36997e+09	8.82479e+09
Q8BKZ9	Pyruvate dehydrogenase protein X component, mitochondrial	Pdhx	6	2	1.027	0.449251	26095.8	32715.9	38586.5	42280.1	33597.8	32997.7
P70175	Disks large homolog 3	Dlg3	2	1	1.027	0.887338	95193	128611	80735	101790	92966.4	97756.9
P05201	Aspartate aminotransferase, cytoplasmic	Got1	388	24	1.026	0.616166	2.22384e+07	2.97718e+07	3.51436e+07	3.05361e+07	2.95022e+07	3.27824e+07
Q05920	Pyruvate carboxylase, mitochondrial	Pc	3603	71	1.026	0.706468	1.11993e+09	1.1558e+09	1.04511e+09	1.16848e+09	1.06077e+09	1.14864e+09
B2RSH2	Guanine nucleotide-binding protein G(i) subunit alpha-1	Gnai1	48	5	1.026	0.849816	1.12872e+06	1.92416e+06	1.42196e+06	1.45826e+06	1.23097e+06	1.54843e+06
Q91YQ5	Dolichyl-diphosphooligosaccharide--protein glycosyltransferase subunit 1	Rpn1	6	2	1.024	0.812097	179433	224345	183856	205517	188302	179603
P20444	Protein kinase C alpha type	Prkca	12	2	1.024	0.691341	98728.9	82298.6	68117.2	74152.1	84260	107832
Q99104	Unconventional myosin-Va	Myo5a	12	5	1.023	0.487236	276809	442893	305508	329726	244368	312530
P62264	40S ribosomal protein S14	Rps14	13	1	1.022	0.978473	133914	210407	159525	163067	174229	156287
Q8QZT1	Acetyl-CoA acetyltransferase, mitochondrial	Acat1	99	14	1.022	0.636956	4.07737e+06	5.13131e+06	3.4876e+06	4.2036e+06	3.39209e+06	4.16736e+06
P47757	F-actin-capping protein subunit beta	Capzb	64	6	1.02	0.665121	2.50797e+06	2.63948e+06	2.30102e+06	2.5592e+06	2.36432e+06	2.72895e+06
Q9D8E6	60S ribosomal protein L4	Rpl4	20	4	1.02	0.33063	543675	522510	427053	571606	533139	529757
P08553	Neurofilament medium polypeptide	Nefm	320	28	1.02	0.828069	1.57553e+07	2.16909e+07	1.84659e+07	1.88323e+07	2.02821e+07	1.77515e+07
Q9D172	Glutamine amidotransferase-like class 1 domain-containing protein 3, mitochondrial	Gatd3	42	6	1.018	0.98911	459058	844867	662036	816078	461947	673911
Q9R0K7	Plasma membrane calcium-transporting ATPase 2	Atp2b2	201	10	1.018	0.419236	1.59427e+06	2.03498e+06	1.96137e+06	1.99629e+06	1.91207e+06	2.10494e+06
Q9R1T4	Septin-6	Septin6	59	3	1.017	0.981749	899928	1.0313e+06	981170	998037	870188	1.04333e+06
P09405	Nucleolin	Ncl	21	4	1.017	0.492012	251068	262061	225372	264607	246694	255218
P61161	Actin-related protein 2	Actr2	6	3	1.016	0.744941	272942	379300	205102	314505	190921	277192
Q8BH66	Atlastin-1	Atl1	5	3	1.013	0.485804	26729.8	46651.3	42710.4	47430.9	40435.1	43277.3
P08551	Neurofilament light polypeptide	Nefl	121	11	1.013	0.600904	2.65844e+06	3.40518e+06	3.07052e+06	3.11039e+06	3.30994e+06	3.09042e+06
Q6ZQ38	Cullin-associated NEDD8-dissociated protein 1	Cand1	36	10	1.012	0.800712	535703	909979	260789	541903	173965	834052
P41105	60S ribosomal protein L28	Rpl28	4	2	1.011	0.261713	90954.4	139411	136581	195859	132888	138065
Q5PR73	GTP-binding protein Di-Ras2	Diras2	27	3	1.011	0.489015	413951	550478	538307	544762	544138	521565
P31324	cAMP-dependent protein kinase type II-beta regulatory subunit	Prkar2b	66	8	1.01	0.489	1.96632e+06	2.8463e+06	3.34136e+06	3.4774e+06	2.81507e+06	2.87475e+06
P48758	Carbonyl reductase	Cbr1	52	3	1.009	0.390417	859278	1.02349e+06	1.02287e+06	1.03158e+06	973730	1.0936e+06
O35129	Prohibitin-2	Phb2	15	7	1.008	0.674848	220453	316842	358471	355796	276407	319527
Q9DCD0	6-phosphogluconate dehydrogenase, decarboxylating	Pgd	9	1	1.008	0.644975	157805	164142	137726	165474	148870	159005
P49615	Cyclin-dependent kinase 5	Cdk5	14	3	1.007	0.739789	111356	187438	155607	146254	156673	169282
P15532	Nucleoside diphosphate kinase A	Nme1	62	3	1.006	0.533463	2.39857e+06	4.20808e+06	3.77896e+06	4.08851e+06	3.61886e+06	3.79983e+06
Q3UMR5	Calcium uniporter protein, mitochondrial	Mcu	15	4	1.005	0.973294	161127	173613	125928	162418	132185	162000
Q9D898	Actin-related protein 2/3 complex subunit 5-like protein	Arpc5l	14	1	1.005	0.861255	357248	392011	528998	393835	349859	492879
Q9CPU0	Lactoylglutathione lyase	Glo1	37	5	1.004	0.661274	2.93575e+06	3.58378e+06	3.44686e+06	3.46036e+06	3.30855e+06	3.48214e+06
P42669	Transcriptional activator protein Pur-alpha	Pura	17	3	1.003	0.877391	654393	808721	462139	656549	455206	734862
C0HKE3	Histone H2A type 1-D	H2ac7	85	1	1.003	0.918964	1.32062e+07	1.53739e+07	1.76377e+07	1.54125e+07	1.50809e+07	1.58608e+07
P00493	Hypoxanthine-guanine phosphoribosyltransferase	Hprt1	110	10	1.002	0.551426	3.86076e+06	6.24423e+06	7.20399e+06	6.24165e+06	6.64785e+06	6.25929e+06
Q99MR8	Methylcrotonoyl-CoA carboxylase subunit alpha, mitochondrial	Mccc1	1024	41	1.002	0.899582	1.29783e+08	1.38411e+08	1.55978e+08	1.38726e+08	1.45144e+08	1.35862e+08
P60487	Chronophin	Pdxp	8	1	1.002	0.547191	102226	134994	68161.9	102430	32125.2	113955
O09061	Proteasome subunit beta type-1	Psmb1	21	5	1.001	0.52913	101051	140904	162927	161977	141063	140684
Q99JY0	Trifunctional enzyme subunit beta, mitochondrial	Hadhb	17	3	1.001	0.561138	195186	222259	169325	191656	195380	240321
P24527	Leukotriene A-4 hydrolase	Lta4h	1	1	1.001	0.995043	71920.5	74420.9	79375.3	89701.7	63716.2	74491.7
Q80XN0	D-beta-hydroxybutyrate dehydrogenase, mitochondrial	Bdh1	21	4	1.001	0.518351	732631	901242	837734	839643	584640	838332
Q7TMK9	Heterogeneous nuclear ribonucleoprotein Q	Syncrip	15	3	0.999	0.855478	199629	217910	164834	201274	188122	199481
Q3TXX4	Vesicular glutamate transporter 1	Slc17a7	67	10	0.999	0.663684	2.94553e+06	2.82767e+06	2.97154e+06	2.94226e+06	2.39104e+06	3.11261e+06
Q9D6R2	Isocitrate dehydrogenase	Idh3a	116	10	0.997	0.489388	3.01741e+06	4.10083e+06	3.1235e+06	3.11554e+06	2.57828e+06	3.54423e+06
Q571F8	Glutaminase liver isoform, mitochondrial	Gls2	17	1	0.996	0.858892	384710	473701	476974	471693	402713	481809
Q8BVI4	Dihydropteridine reductase	Qdpr	23	4	0.995	0.313743	406436	641714	424375	422403	310161	444874
O09167	60S ribosomal protein L21	Rpl21	4	1	0.995	0.868136	151455	71135.9	160640	44961.9	150734	192863
P35803	Neuronal membrane glycoprotein M6-b	Gpm6b	18	3	0.995	0.799172	1.26353e+06	1.41626e+06	1.4181e+06	1.4259e+06	1.31205e+06	1.40904e+06
Q4KMM3	Oxidation resistance protein 1	Oxr1	22	3	0.995	0.910748	475240	475251	419452	474377	413292	472672
Q02248	Catenin beta-1	Ctnnb1	21	3	0.993	0.758018	46872.2	58289.5	42695.8	46539.9	42799	70013.3
Q8BMF4	Dihydrolipoyllysine-residue acetyltransferase component of pyruvate dehydrogenase complex, mitochondrial	Dlat	101	11	0.992	0.882176	5.11023e+06	7.48892e+06	6.82041e+06	6.76785e+06	5.94699e+06	6.89076e+06
Q11011	Puromycin-sensitive aminopeptidase	Npepps	36	8	0.992	0.631634	621646	1.12644e+06	380133	616600	391530	629512
D3YVF0	A-kinase anchor protein 5	Akap5	8	1	0.992	0.691648	130034	179894	223981	234093	161004	178418
Q8C0E2	Vacuolar protein sorting-associated protein 26B	Vps26b	9	2	0.99	0.958182	388933	502094	441477	462587	420598	437105
P17751	Triosephosphate isomerase	Tpi1	211	16	0.989	0.861071	1.37641e+07	1.68797e+07	1.86261e+07	1.70539e+07	1.66981e+07	1.60335e+07
P05202	Aspartate aminotransferase, mitochondrial	Got2	659	27	0.989	0.370993	8.03367e+07	1.20557e+08	1.21037e+08	1.18966e+08	1.19201e+08	1.31908e+08
Q62261	Spectrin beta chain, non-erythrocytic 1	Sptbn1	307	51	0.988	0.715164	1.02544e+07	1.31304e+07	7.30212e+06	1.03262e+07	7.39105e+06	1.01323e+07
Q99MN9	Propionyl-CoA carboxylase beta chain, mitochondrial	Pccb	13	4	0.988	0.380938	255550	265683	246555	234445	252395	255434
P97447	Four and a half LIM domains protein 1	Fhl1	68	7	0.988	0.711792	1.91136e+06	2.18602e+06	2.98553e+06	2.10169e+06	2.31792e+06	2.15898e+06
O55023	Inositol monophosphatase 1	Impa1	27	4	0.987	0.737283	413136	506707	406923	407883	316120	545241
Q06185	ATP synthase subunit e, mitochondrial	Atp5me	13	2	0.987	0.650377	404524	469022	524048	534350	462855	459293
Q60771	Claudin-11	Cldn11	10	1	0.985	0.897614	1.25958e+06	1.26396e+06	1.13979e+06	1.10355e+06	1.29408e+06	1.24029e+06
P62137	Serine/threonine-protein phosphatase PP1-alpha catalytic subunit	Ppp1ca	84	4	0.985	0.860382	1.84618e+06	2.56253e+06	2.82631e+06	2.53494e+06	2.52326e+06	2.26185e+06
P62717	60S ribosomal protein L18a	Rpl18a	4	2	0.984	0.984961	107255	114429	134094	149855	112554	98418.5
P70202	Latexin	Lxn	16	3	0.983	0.909622	454662	679123	1.05619e+06	667314	823604	536291
O35449	Proline-rich transmembrane protein 1	Prrt1	3	1	0.982	0.559825	142653	141384	77384.7	138815	115379	150377
P32848	Parvalbumin alpha	Pvalb	1	1	0.982	0.868196	63697.3	88447.2	100589	86833.2	74949	94566.4
Q9CQV8	14-3-3 protein beta/alpha	Ywhab	176	6	0.982	0.355072	2.65897e+06	2.56801e+06	2.09782e+06	3.09599e+06	2.5207e+06	2.51867e+06
P70704	Phospholipid-transporting ATPase IA	Atp8a1	1	1	0.981	0.839021	149164	156347	143687	137463	146370	175474
Q8BVE3	V-type proton ATPase subunit H	Atp6v1h	32	7	0.981	0.392084	733987	1.08046e+06	796705	847599	615167	781235
Q9CPQ1	Cytochrome c oxidase subunit 6C	Cox6c	3	1	0.98	0.969186	189000	255130	327336	250069	197463	311602
P02301	Histone H3.3C	H3-5	16	3	0.979	0.636229	2.95198e+06	3.42301e+06	1.73578e+06	2.8898e+06	2.56425e+06	3.37033e+06
Q9EQH3	Vacuolar protein sorting-associated protein 35	Vps35	32	5	0.977	0.654408	546870	839016	329860	563075	310410	534484
Q8BGN3	Glycerophosphocholine cholinephosphodiesterase ENPP6	Enpp6	8	1	0.977	0.404477	246695	155072	216081	206405	1.38376e+06	211157
Q9Z0P4	Paralemmin-1	Palm	15	3	0.976	0.652824	197905	328186	314291	306853	273902	314400
Q8BFR5	Elongation factor Tu, mitochondrial	Tufm	88	9	0.975	0.706116	2.14225e+06	2.87853e+06	2.46435e+06	2.40364e+06	2.11508e+06	2.62589e+06
O55143	Sarcoplasmic/endoplasmic reticulum calcium ATPase 2	Atp2a2	87	13	0.975	0.829721	1.82974e+06	2.05913e+06	2.07474e+06	2.00818e+06	1.60555e+06	2.24707e+06
P51150	Ras-related protein Rab-7a	Rab7a	58	5	0.975	0.780675	1.24176e+06	1.44649e+06	1.4603e+06	1.41017e+06	1.21832e+06	1.42987e+06
Q8BZ98	Dynamin-3	Dnm3	118	2	0.975	0.688455	972562	1.36079e+06	1.14646e+06	1.11738e+06	915011	1.24927e+06
P63328	Protein phosphatase 3 catalytic subunit alpha	Ppp3ca	207	10	0.975	0.846855	1.41481e+07	1.70301e+07	2.12614e+07	1.75228e+07	1.62905e+07	1.65975e+07
Q9R0P3	S-formylglutathione hydrolase	Esd	17	2	0.974	0.987226	349774	365698	365104	355688	352645	371905
P23242	Gap junction alpha-1 protein	Gja1	9	1	0.974	0.899133	188397	170734	256810	177546	183527	273281
P99026	Proteasome subunit beta type-4	Psmb4	3	2	0.974	0.59953	55302.2	94998.8	116313	112246	89562.8	92520.6
P08249	Malate dehydrogenase, mitochondrial	Mdh2	359	16	0.972	0.676405	3.23914e+07	4.17905e+07	4.07014e+07	4.09525e+07	3.83021e+07	3.95588e+07
P38647	Stress-70 protein, mitochondrial	Hspa9	34	5	0.972	0.764542	1.0575e+06	1.2531e+06	1.29354e+06	1.21742e+06	1.24424e+06	1.20715e+06
P16546	Spectrin alpha chain, non-erythrocytic 1	Sptan1	502	71	0.971	0.419773	1.93417e+07	2.35159e+07	1.73047e+07	1.98241e+07	1.53153e+07	1.87881e+07
Q8CDN6	Thioredoxin-like protein 1	Txnl1	12	1	0.971	0.926089	124385	147849	99235.4	130182	111809	120722
Q8CCT4	Transcription elongation factor A protein-like 5	Tceal5	19	2	0.97	0.779053	179471	208394	237453	202128	198987	204254
P62823	Ras-related protein Rab-3C	Rab3c	76	4	0.97	0.716438	1.66588e+06	2.46133e+06	1.96294e+06	2.2657e+06	1.55224e+06	1.90379e+06
P27546	Microtubule-associated protein 4	Map4	9	1	0.969	0.671058	233480	267258	202236	224517	226339	292008
Q91ZA3	Propionyl-CoA carboxylase alpha chain, mitochondrial	Pcca	3652	58	0.969	0.682296	1.12445e+09	1.08008e+09	1.17327e+09	1.06677e+09	1.16824e+09	1.08962e+09
Q99K85	Phosphoserine aminotransferase	Psat1	12	1	0.967	0.879577	185414	241991	273158	215424	234121	258723
Q921F2	TAR DNA-binding protein 43	Tardbp	13	4	0.967	0.129275	545062	552904	574832	503911	544215	534709
Q62108	Disks large homolog 4	Dlg4	136	13	0.964	0.429935	1.8636e+06	2.32729e+06	2.33776e+06	2.89412e+06	2.14231e+06	2.24464e+06
Q9WTT4	V-type proton ATPase subunit G 2	Atp6v1g2	26	2	0.964	0.597719	134259	149820	136096	131249	109366	156537
Q9CPW4	Actin-related protein 2/3 complex subunit 5	Arpc5	34	4	0.964	0.129881	2.41025e+06	2.47555e+06	2.60534e+06	2.41268e+06	2.23565e+06	2.38709e+06
P47754	F-actin-capping protein subunit alpha-2	Capza2	50	7	0.964	0.822053	3.29127e+06	4.25287e+06	3.64454e+06	4.52582e+06	3.48273e+06	3.51312e+06
Q9QYF9	Protein NDRG3	Ndrg3	5	2	0.964	0.95171	264355	246173	175640	237238	206592	239589
Q61548	Clathrin coat assembly protein AP180	Snap91	38	6	0.964	0.679766	998668	1.49464e+06	1.13273e+06	1.28449e+06	997566	1.09159e+06
P35279	Ras-related protein Rab-6A	Rab6a	35	1	0.963	0.897065	597078	823886	874253	793449	715991	798486
P21550	Beta-enolase	Eno3	81	1	0.961	0.762455	1.26669e+06	1.57593e+06	1.69181e+06	1.61724e+06	1.22649e+06	1.5145e+06
P43274	Histone H1.4	H1-4	40	2	0.961	0.683705	506557	589634	560901	579270	538791	493079
Q8BI08	Protein MAL2	Mal2	9	1	0.96	0.435317	535375	174189	527574	600986	476902	506493
Q5FWK3	Rho GTPase-activating protein 1	Arhgap1	1	1	0.959	0.982514	69149.2	117190	98735.2	102381	83536.8	94683.4
P80317	T-complex protein 1 subunit zeta	Cct6a	16	5	0.959	0.427351	650992	827549	698538	669762	576338	743109
Q9CQN1	Heat shock protein 75 kDa, mitochondrial	Trap1	25	1	0.958	0.362457	3.82365e+06	5.73176e+06	3.46416e+06	4.0282e+06	2.89345e+06	3.66213e+06
P17183	Gamma-enolase	Eno2	244	13	0.957	0.807833	1.06336e+07	1.47214e+07	1.32653e+07	1.3327e+07	1.12559e+07	1.27001e+07
Q9QUM9	Proteasome subunit alpha type-6	Psma6	20	3	0.957	0.509614	498187	536538	619009	542356	509006	513577
Q9QWI6	SRC kinase signaling inhibitor 1	Srcin1	7	2	0.956	0.235962	275888	361990	264748	272688	263808	222275
Q9ESW4	Acylglycerol kinase, mitochondrial	Agk	3	1	0.956	0.351335	50368.1	67611	49681.2	36231.9	57050.7	48144.8
Q9R1S8	Calpain-7	Capn7	11	1	0.956	0.889749	653489	771703	907431	969828	737631	681515
P70232	Neural cell adhesion molecule L1-like protein	Chl1	12	2	0.955	0.706069	88801.8	84210.8	50880	83347.5	71802.7	80426.7
P35802	Neuronal membrane glycoprotein M6-a	Gpm6a	46	5	0.954	0.736593	3.72415e+06	5.71924e+06	4.67785e+06	4.9165e+06	3.88283e+06	4.46432e+06
Q99LC3	NADH dehydrogenase	Ndufa10	7	2	0.952	0.735936	106384	167103	128825	122639	96403.6	157190
P06837	Neuromodulin	Gap43	40	6	0.951	0.811461	1.95416e+06	2.10891e+06	1.77027e+06	2.14945e+06	1.71301e+06	1.85835e+06
P10853	Histone H2B type 1-F/J/L	H2bc7	115	5	0.949	0.691103	1.34633e+07	1.60248e+07	1.82562e+07	1.55829e+07	1.46979e+07	1.52131e+07
Q00493	Carboxypeptidase E	Cpe	3	1	0.947	0.981487	66179.5	78440.5	60224.2	62647.2	59464.8	83115.7
P63101	14-3-3 protein zeta/delta	Ywhaz	304	12	0.945	0.604485	3.23536e+07	4.39007e+07	4.3731e+07	4.59335e+07	3.96639e+07	4.13384e+07
Q9R1Q8	Transgelin-3	Tagln3	11	3	0.945	0.961072	83122.6	98766.1	105481	112651	93340.3	80829.5
Q91V61	Sideroflexin-3	Sfxn3	63	6	0.945	0.963711	1.79209e+06	2.36817e+06	2.20052e+06	2.63625e+06	1.66495e+06	2.07927e+06
Q99P72	Reticulon-4	Rtn4	16	2	0.944	0.818432	436777	605021	608993	599719	514038	571303
Q9Z2U1	Proteasome subunit alpha type-5	Psma5	7	1	0.944	0.567356	171649	271785	256459	241985	201587	386385
Q9CWF2	Tubulin beta-2B chain	Tubb2b	1500	2	0.942	0.473913	2.30862e+06	1.97167e+06	1.76571e+06	2.01943e+06	1.72061e+06	1.85745e+06
Q9D1A0	Peroxiredoxin-like 2C	Prxl2c	13	1	0.942	0.536423	4.18672e+06	3.65517e+06	5.66784e+06	3.84144e+06	4.28109e+06	3.94353e+06
P45376	Aldo-keto reductase family 1 member B1	Akr1b1	9	2	0.942	0.700288	170884	224907	226692	211818	146337	228289
Q80TJ1	Calcium-dependent secretion activator 1	Cadps	99	11	0.941	0.976841	1.74794e+06	2.52722e+06	1.16821e+06	1.96195e+06	1.63497e+06	1.64512e+06
P61226	Ras-related protein Rap-2b	Rap2b	20	2	0.941	0.250007	660176	862150	659065	621058	601142	657426
Q61316	Heat shock 70 kDa protein 4	Hspa4	80	11	0.941	0.443049	2.54751e+06	2.79985e+06	2.14279e+06	2.39656e+06	1.86201e+06	2.51023e+06
Q91WD5	NADH dehydrogenase	Ndufs2	19	4	0.94	0.727957	553265	743095	341713	520257	299984	630828
Q61753	D-3-phosphoglycerate dehydrogenase	Phgdh	29	8	0.94	0.809765	658691	831433	461337	618856	468562	736968
Q99M71	Mammalian ependymin-related protein 1	Epdr1	16	3	0.939	0.315579	529466	539156	793839	535441	506499	494445
O35678	Monoglyceride lipase	Mgll	8	1	0.939	0.753984	153458	179334	179574	168468	149742	181387
P62746	Rho-related GTP-binding protein RhoB	Rhob	36	3	0.938	0.542255	619108	345997	342665	462278	304122	324650
P26645	Myristoylated alanine-rich C-kinase substrate	Marcks	1	1	0.938	0.689431	37976.6	52568	46856	41002.9	43942.3	45356.7
Q8K1M6	Dynamin-1-like protein	Dnm1l	44	7	0.938	0.95711	661411	680800	375143	620215	408698	696004
Q9CXW4	60S ribosomal protein L11	Rpl11	12	1	0.937	0.636659	308736	332313	313974	294147	287194	345339
Q62420	Endophilin-A1	Sh3gl2	43	7	0.937	0.342107	707167	792614	697375	658949	662497	744890
Q2PFD7	PH and SEC7 domain-containing protein 3	Psd3	35	5	0.935	0.745956	4.75829e+06	6.88516e+06	1.20525e+07	6.4364e+06	5.44901e+06	8.19936e+06
Q8R081	Heterogeneous nuclear ribonucleoprotein L	Hnrnpl	3	1	0.934	0.527677	220490	262113	284530	260779	209532	244834
P35486	Pyruvate dehydrogenase E1 component subunit alpha, somatic form, mitochondrial	Pdha1	300	19	0.934	0.226843	1.83126e+07	2.31887e+07	1.83853e+07	1.71504e+07	1.77549e+07	1.71644e+07
Q9DB77	Cytochrome b-c1 complex subunit 2, mitochondrial	Uqcrc2	84	9	0.933	0.0990282	3.60831e+06	3.22268e+06	3.20924e+06	3.15728e+06	2.75641e+06	3.00722e+06
P51174	Long-chain specific acyl-CoA dehydrogenase, mitochondrial	Acadl	6	1	0.933	0.967074	174520	220665	205596	180924	191733	225386
Q8BGH2	Sorting and assembly machinery component 50 homolog	Samm50	16	5	0.931	0.842707	200303	281896	278495	190491	259294	286467
Q9D8Y0	EF-hand domain-containing protein D2	Efhd2	15	3	0.93	0.837078	239115	348991	485681	364329	295882	324633
Q9R0P5	Destrin	Dstn	25	2	0.93	0.480875	722062	953196	852418	828711	717032	792753
Q3UHB1	5'-nucleotidase domain-containing protein 3	Nt5dc3	6	3	0.927	0.883498	138889	191931	172756	135436	160227	231698
Q9D358	Low molecular weight phosphotyrosine protein phosphatase	Acp1	18	3	0.926	0.936064	205710	199096	165281	168091	184438	212994
Q3UNH4	G protein-regulated inducer of neurite outgrowth 1	Gprin1	37	8	0.926	0.687581	541805	700524	515727	737314	501804	406670
Q9Z130	Heterogeneous nuclear ribonucleoprotein D-like	Hnrnpdl	21	1	0.926	0.627539	210519	253486	332274	277637	212677	234703
P40142	Transketolase	Tkt	190	21	0.926	0.703438	5.35555e+06	7.91175e+06	7.90318e+06	7.24408e+06	7.31603e+06	7.49971e+06
Q9ES97	Reticulon-3	Rtn3	18	3	0.925	0.701541	382348	532346	439961	407139	401173	476963
P31938	Dual specificity mitogen-activated protein kinase kinase 1	Map2k1	18	4	0.924	0.236397	690682	1.01074e+06	641644	638199	539608	648624
P67778	Prohibitin 1	Phb1	24	4	0.923	0.609314	335702	402554	266203	309967	265147	344643
O89112	Glutathione S-transferase LANCL1	Lancl1	4	1	0.923	0.706438	219600	249629	251497	284406	174015	230417
Q9D2P8	Myelin-associated oligodendrocyte basic protein	Mobp	53	3	0.923	0.543448	1.00333e+06	1.25611e+06	468604	925855	899325	1.40319e+06
P97315	Cysteine and glycine-rich protein 1	Csrp1	43	5	0.922	0.54529	1.55129e+06	1.96468e+06	2.61927e+06	1.87207e+06	1.69311e+06	1.81068e+06
P54071	Isocitrate dehydrogenase	Idh2	12	1	0.921	0.74103	127085	147385	98034	117042	88246.6	145571
D3Z7P3	Glutaminase kidney isoform, mitochondrial	Gls	69	11	0.92	0.413754	3.27923e+06	4.06352e+06	3.85711e+06	3.58733e+06	3.54897e+06	3.2982e+06
P60867	40S ribosomal protein S20	Rps20	27	2	0.919	0.702377	373528	382157	324580	343139	317356	386926
Q9Z1G4	V-type proton ATPase 116 kDa subunit a 1	Atp6v0a1	161	16	0.916	0.214201	8.98174e+06	1.01992e+07	9.69695e+06	8.8803e+06	7.425e+06	9.32328e+06
P99029	Peroxiredoxin-5, mitochondrial	Prdx5	61	6	0.914	0.866412	2.25372e+06	2.56404e+06	2.55586e+06	2.33708e+06	2.16089e+06	2.78918e+06
Q8BMS1	Trifunctional enzyme subunit alpha, mitochondrial	Hadha	6	2	0.914	0.231132	154284	179678	156292	142796	97100.2	153360
Q8K183	Pyridoxal kinase	Pdxk	47	7	0.913	0.645038	1.34997e+06	2.0774e+06	1.9968e+06	2.30975e+06	1.70639e+06	1.82365e+06
Q9CQR4	Acyl-coenzyme A thioesterase 13	Acot13	24	2	0.913	0.684416	797985	841705	472904	728722	658177	869991
Q7TQF7	Amphiphysin	Amph	43	6	0.913	0.554042	733414	1.31425e+06	871491	795751	721063	990316
Q76MZ3	Serine/threonine-protein phosphatase 2A 65 kDa regulatory subunit A alpha isoform	Ppp2r1a	60	9	0.912	0.618308	1.08392e+06	1.48247e+06	671603	988932	581987	1.13887e+06
Q9DCX2	ATP synthase subunit d, mitochondrial	Atp5pd	49	4	0.912	0.806563	1.44912e+06	1.62522e+06	1.05316e+06	1.40961e+06	1.18879e+06	1.32196e+06
P70349	Adenosine 5'-monophosphoramidase HINT1	Hint1	12	1	0.912	0.830857	249752	269123	212085	303527	224141	227743
Q6PER3	Microtubule-associated protein RP/EB family member 3	Mapre3	12	3	0.912	0.391526	180494	230817	153101	164544	33070.6	189314
P08228	Superoxide dismutase	Sod1	77	5	0.91	0.8026	7.56813e+06	9.2907e+06	8.9255e+06	9.38192e+06	7.68476e+06	8.12184e+06
Q60634	Flotillin-2	Flot2	6	1	0.907	0.244155	68008.8	59874.7	66001.4	63131.7	49376.7	59883.4
Q8BH95	Enoyl-CoA hydratase, mitochondrial	Echs1	19	3	0.907	0.311637	214894	250210	188698	194862	122174	212057
O88737	Protein bassoon	Bsn	15	7	0.907	0.473664	173535	278650	209859	230022	149075	190242
Q9DCW4	Electron transfer flavoprotein subunit beta	Etfb	6	1	0.905	0.427371	134418	153823	119321	121678	68261.9	148136
Q01853	Transitional endoplasmic reticulum ATPase	Vcp	70	14	0.904	0.753689	1.75334e+06	2.41594e+06	1.20707e+06	1.58503e+06	1.18864e+06	2.08998e+06
Q61656	Probable ATP-dependent RNA helicase DDX5	Ddx5	31	5	0.904	0.93056	610804	426295	280996	385258	338977	520852
Q8R2R9	AP-3 complex subunit mu-2	Ap3m2	16	4	0.903	0.445262	312984	403774	252007	336155	282658	198121
P61089	Ubiquitin-conjugating enzyme E2 N	Ube2n	27	4	0.902	0.797629	638888	1.24419e+06	382190	443681	576363	856108
Q9CVB6	Actin-related protein 2/3 complex subunit 2	Arpc2	42	7	0.902	0.732398	1.29534e+06	1.82475e+06	1.82094e+06	1.64261e+06	1.33584e+06	1.68663e+06
Q8VEK3	Heterogeneous nuclear ribonucleoprotein U	Hnrnpu	18	6	0.901	0.920291	551896	542105	470940	479333	488514	620972
P19157	Glutathione S-transferase P 1	Gstp1	27	5	0.901	0.0828272	2.92254e+06	3.39166e+06	3.12274e+06	2.81378e+06	2.4391e+06	2.85118e+06
P56391	Cytochrome c oxidase subunit 6B1	Cox6b1	25	3	0.899	0.990243	1.05337e+06	1.17867e+06	1.22107e+06	1.37718e+06	1.06004e+06	1.03427e+06
P46660	Alpha-internexin	Ina	192	19	0.899	0.610368	7.51439e+06	1.0365e+07	9.42177e+06	8.46822e+06	8.71494e+06	8.37501e+06
Q9WV69	Dematin	Dmtn	8	1	0.898	0.952747	98824.6	107578	116235	135555	96563.7	92025.9
O55042	Alpha-synuclein	Snca	22	2	0.897	0.189467	626972	673735	684216	616001	468925	604659
Q60668	Heterogeneous nuclear ribonucleoprotein D0	Hnrnpd	32	2	0.897	0.395518	953689	1.2347e+06	1.16976e+06	1.09023e+06	914346	1.049e+06
Q60692	Proteasome subunit beta type-6	Psmb6	16	2	0.895	0.263574	537381	526028	484898	470603	397348	516128
P63087	Serine/threonine-protein phosphatase PP1-gamma catalytic subunit	Ppp1cc	58	1	0.894	0.390877	225454	265449	348819	237353	210656	270183
P14211	Calreticulin	Calr	33	5	0.894	0.0940736	528597	631224	559410	502507	476631	499932
P24369	Peptidyl-prolyl cis-trans isomerase B	Ppib	34	6	0.893	0.15266	512843	549040	470661	423058	457745	492049
Q91VD9	NADH-ubiquinone oxidoreductase 75 kDa subunit, mitochondrial	Ndufs1	45	7	0.89	0.378297	1.18969e+06	1.51552e+06	896271	1.08539e+06	820258	1.05928e+06
P50516	V-type proton ATPase catalytic subunit A	Atp6v1a	154	17	0.89	0.235558	6.3869e+06	8.63718e+06	7.5211e+06	6.6944e+06	5.96872e+06	6.73517e+06
P63044	Vesicle-associated membrane protein 2	Vamp2	13	2	0.889	0.381373	323388	356574	427764	317093	373875	306882
Q5SWU9	Acetyl-CoA carboxylase 1	Acaca	938	79	0.889	0.351925	6.26954e+07	5.89879e+07	4.97372e+07	5.03399e+07	5.42184e+07	5.24532e+07
P48771	Cytochrome c oxidase subunit 7A2, mitochondrial	Cox7a2	20	2	0.889	0.376028	425331	253843	291931	279472	257747	259585
P30275	Creatine kinase U-type, mitochondrial	Ckmt1	138	10	0.889	0.811229	3.30631e+06	4.58298e+06	4.87379e+06	4.07369e+06	4.30791e+06	3.80567e+06
P61294	Ras-related protein Rab-6B	Rab6b	39	1	0.888	0.573559	177495	225113	240285	199868	177004	220511
P56480	ATP synthase subunit beta, mitochondrial	Atp5f1b	249	16	0.886	0.755263	1.19176e+07	1.61016e+07	1.65847e+07	1.51508e+07	1.42701e+07	1.30802e+07
Q9Z0E0	Neurochondrin	Ncdn	140	16	0.886	0.948558	1.72024e+07	1.85259e+07	1.04355e+07	1.52423e+07	1.22544e+07	1.70565e+07
P63158	High mobility group protein B1	Hmgb1	8	2	0.885	0.371139	244916	292308	394258	258698	228994	291637
Q61553	Fascin	Fscn1	81	7	0.883	0.310058	2.48296e+06	3.09065e+06	3.00296e+06	2.65079e+06	2.27737e+06	2.77669e+06
Q9CZY3	Ubiquitin-conjugating enzyme E2 variant 1	Ube2v1	11	1	0.882	0.616058	390701	586502	525442	485420	430721	463211
Q93092	Transaldolase	Taldo1	3	2	0.88	0.0470744	79375.3	68562.5	72671.4	63938.6	57343.7	65387.4
Q9DBP5	UMP-CMP kinase	Cmpk1	23	5	0.88	0.435255	293584	454322	520747	408162	399663	192715
P46096	Synaptotagmin-1	Syt1	190	16	0.879	0.930627	1.0942e+07	1.61186e+07	1.51115e+07	1.5548e+07	1.24107e+07	1.32868e+07
O35737	Heterogeneous nuclear ribonucleoprotein H	Hnrnph1	8	2	0.878	0.366262	310898	418041	263630	323335	58562.3	273115
Q8VCM7	Fibrinogen gamma chain	Fgg	186	15	0.874	0.528675	1.29936e+07	7.45286e+06	3.26501e+07	1.35226e+07	7.51629e+06	1.13613e+07
Q9D819	Inorganic pyrophosphatase	Ppa1	11	2	0.874	0.598573	113519	122375	132410	191909	106970	35891.3
P04370	Myelin basic protein	Mbp	164	6	0.87	0.437716	3.19869e+07	4.25743e+07	4.23202e+07	3.09855e+07	3.68303e+07	3.75723e+07
Q02053	Ubiquitin-like modifier-activating enzyme 1	Uba1	118	18	0.87	0.358487	4.17099e+06	5.50939e+06	4.23519e+06	3.68497e+06	2.94752e+06	5.03501e+06
O55125	Protein NipSnap homolog 1	Nipsnap1	23	1	0.869	0.280844	426223	510098	379871	371217	128138	370370
P58771	Tropomyosin alpha-1 chain	Tpm1	27	2	0.869	0.941571	420237	882542	895748	532933	871126	766578
P62631	Elongation factor 1-alpha 2	Eef1a2	226	5	0.867	0.554356	3.03875e+06	4.61498e+06	4.1235e+06	3.57521e+06	3.38473e+06	3.66568e+06
Q99K48	Non-POU domain-containing octamer-binding protein	Nono	4	1	0.866	0.460319	345628	353210	10670.6	299418	258054	399723
Q60864	Stress-induced-phosphoprotein 1	Stip1	23	4	0.865	0.0437821	587378	585226	646154	521571	508087	432121
Q61644	Protein kinase C and casein kinase substrate in neurons protein 1	Pacsin1	58	11	0.863	0.231114	1.33375e+06	1.69791e+06	1.35493e+06	1.14688e+06	1.16989e+06	1.44802e+06
P18760	Cofilin-1	Cfl1	83	8	0.861	0.494072	5.23021e+06	6.69292e+06	7.37881e+06	5.76407e+06	5.54538e+06	6.23525e+06
A2BDX3	Adenylyltransferase and sulfurtransferase MOCS3	Mocs3	4	1	0.86	0.249574	140693	151746	148587	127850	107892	148336
P70195	Proteasome subunit beta type-7	Psmb7	6	1	0.858	0.58037	116378	153827	168726	153296	116385	131936
P20357	Microtubule-associated protein 2	Map2	229	27	0.857	0.190503	7.01078e+06	8.24514e+06	7.56434e+06	7.56046e+06	6.47919e+06	6.1995e+06
Q9R1P3	Proteasome subunit beta type-2	Psmb2	11	1	0.85	0.911222	186518	275410	276128	233998	284576	224847
Q8R3V5	Endophilin-B2	Sh3glb2	4	2	0.848	0.396936	104963	148534	127995	127045	108583	102247
P27773	Protein disulfide-isomerase A3	Pdia3	41	7	0.844	0.149185	563343	572418	541753	475507	383479	520093
Q9D2G2	Dihydrolipoyllysine-residue succinyltransferase component of 2-oxoglutarate dehydrogenase complex, mitochondrial	Dlst	54	5	0.844	0.966366	1.42923e+06	2.41688e+06	2.07561e+06	2.2929e+06	1.74172e+06	1.7516e+06
Q8K3J1	NADH dehydrogenase	Ndufs8	10	2	0.843	0.784605	110018	182404	222921	162460	153679	147062
P20029	Endoplasmic reticulum chaperone BiP	Hspa5	126	11	0.841	0.63999	1.51693e+06	1.52706e+06	1.15965e+06	1.27548e+06	1.21512e+06	1.46996e+06
P53026	60S ribosomal protein L10a	Rpl10a	6	2	0.841	0.479085	158231	192811	170841	143615	142920	192902
Q8BHN3	Neutral alpha-glucosidase AB	Ganab	5	1	0.839	0.81332	58298.7	62283.6	28172.3	62469.6	48906.5	41628.7
P84086	Complexin-2	Cplx2	14	3	0.839	0.721006	778814	998305	1.08785e+06	1.161e+06	837127	709568
P60879	Synaptosomal-associated protein 25	Snap25	16	5	0.837	0.209602	524678	641403	807384	573717	447769	536934
Q9Z1G3	V-type proton ATPase subunit C 1	Atp6v1c1	46	9	0.836	0.336864	1.1354e+06	1.66135e+06	2.18316e+06	1.44607e+06	1.38881e+06	947931
P11276	Fibronectin	Fn1	117	15	0.835	0.90462	2.09052e+06	1.09403e+06	2.5035e+06	1.74655e+06	1.42923e+06	2.05989e+06
Q9CZW5	Mitochondrial import receptor subunit TOM70	Tomm70	34	5	0.834	0.77515	553232	679387	385622	461379	418186	622204
Q64433	10 kDa heat shock protein, mitochondrial	Hspe1	13	2	0.831	0.55935	208697	297950	317942	271856	247671	220775
P20065	Thymosin beta-4	Tmsb4x	10	2	0.831	0.589845	508353	438693	320417	434278	364648	342003
P50580	Proliferation-associated protein 2G4	Pa2g4	3	2	0.831	0.849348	43505.2	76213.3	69420.3	85575.2	53547.3	57656
Q8CHH9	Septin-8	Septin8	74	4	0.829	0.422569	604277	797127	817952	656531	660787	678933
P61264	Syntaxin-1B	Stx1b	112	9	0.829	0.753072	3.48881e+06	4.7615e+06	5.20019e+06	4.8589e+06	3.94666e+06	3.89916e+06
P63323	40S ribosomal protein S12	Rps12	10	2	0.828	0.183821	347801	386600	336493	288149	181003	315554
P63017	Heat shock cognate 71 kDa protein	Hspa8	454	25	0.827	0.305312	3.57444e+07	4.45866e+07	4.43689e+07	4.08701e+07	3.42422e+07	3.6708e+07
Q9QXS6	Drebrin	Dbn1	20	5	0.826	0.330521	303162	502764	384329	388113	317638	248456
Q9CPV4	Glyoxalase domain-containing protein 4	Glod4	28	6	0.824	0.706383	528932	987772	967401	796750	812794	585918
Q91Z53	Glyoxylate reductase/hydroxypyruvate reductase	Grhpr	5	1	0.823	0.861747	103024	129257	121651	100088	94133.8	155739
Q91VZ6	Stromal membrane-associated protein 1	Smap1	4	1	0.816	0.544971	117765	243059	317309	92456.1	222247	198273
O08539	Myc box-dependent-interacting protein 1	Bin1	56	8	0.815	0.0521692	1.13994e+06	1.36251e+06	1.22257e+06	1.11369e+06	924358	996689
P17897	Lysozyme C-1	Lyz1	24	1	0.814	0.0297159	3.1203e+06	3.24298e+06	3.48485e+06	2.85554e+06	2.38258e+06	2.63894e+06
Q9EPJ9	ADP-ribosylation factor GTPase-activating protein 1	Arfgap1	4	2	0.813	0.64699	300137	425087	434271	331377	345472	395737
Q3UHL1	CaM kinase-like vesicle-associated protein	Camkv	49	7	0.812	0.242333	764355	958539	643999	762684	620532	465225
Q9Z2U0	Proteasome subunit alpha type-7	Psma7	22	5	0.808	0.540262	597123	685264	696238	745628	545591	554016
Q9CX34	Protein SGT1 homolog	Sugt1	13	2	0.807	0.193906	213974	248181	277391	200361	110456	209202
P14148	60S ribosomal protein L7	Rpl7	14	3	0.806	0.277187	268183	292594	305796	284146	235730	138652
Q922D8	C-1-tetrahydrofolate synthase, cytoplasmic	Mthfd1	2	1	0.804	0.886633	23119.3	133547	88350.5	76319.8	65060.1	71020.4
P63038	60 kDa heat shock protein, mitochondrial	Hspd1	78	15	0.804	0.0912685	2.3616e+06	3.10753e+06	2.30177e+06	2.23228e+06	1.56389e+06	1.89793e+06
Q9CQA3	Succinate dehydrogenase	Sdhb	3	1	0.798	0.466252	2.34624e+06	1.8366e+06	1.30547e+06	1.46617e+06	1.21744e+06	1.88234e+06
Q9R0Q7	Prostaglandin E synthase 3	Ptges3	3	1	0.797	0.909912	68904.8	121198	10959.4	34525.8	64067.3	54941.6
Q9CPP6	NADH dehydrogenase	Ndufa5	12	2	0.796	0.536347	130998	177772	170773	169009	135353	135938
Q9D0K2	Succinyl-CoA:3-ketoacid coenzyme A transferase 1, mitochondrial	Oxct1	16	4	0.795	0.686608	255033	462848	388765	418269	265416	309212
Q9JLT4	Thioredoxin reductase 2, mitochondrial	Txnrd2	32	3	0.791	0.255108	294427	371429	480787	280324	293623	329222
Q8K0T0	Reticulon-1	Rtn1	29	3	0.789	0.398574	656662	1.06824e+06	1.00566e+06	793118	664114	813740
P84075	Neuron-specific calcium-binding protein hippocalcin	Hpca	54	6	0.789	0.733937	1.33062e+06	2.18178e+06	2.15816e+06	1.93423e+06	1.7018e+06	1.561e+06
P0C0S6	Histone H2A.Z	H2az1	55	1	0.788	0.690172	40154.2	233625	215019	185752	169509	142061
P53810	Phosphatidylinositol transfer protein alpha isoform	Pitpna	10	1	0.788	0.087029	227411	221728	284498	143239	179151	211784
P0DP27	Calmodulin-2	Calm2	68	4	0.786	0.53949	2.2017e+06	3.47261e+06	2.79295e+06	3.19978e+06	2.19637e+06	2.07816e+06
Q60598	Src substrate cortactin	Cttn	15	3	0.786	0.247365	675025	733489	766901	689857	576418	334383
Q62048	Astrocytic phosphoprotein PEA-15	Pea15	6	1	0.78	0.812255	276550	373666	387187	421007	287678	291488
Q9EQ20	Methylmalonate-semialdehyde dehydrogenase	Aldh6a1	1	1	0.776	0.676167	158603	177706	101855	123017	92439.3	178767
Q9D855	Cytochrome b-c1 complex subunit 7	Uqcrb	3	1	0.771	0.229248	59557.4	87873.6	78279.1	63253.3	59617.2	60336.9
Q9CPY7	Cytosol aminopeptidase	Lap3	74	9	0.76	0.915453	1.45318e+06	3.02275e+06	2.76624e+06	2.0845e+06	2.54601e+06	2.10305e+06
Q9JJV2	Profilin-2	Pfn2	22	3	0.759	0.0546647	403365	506816	461652	350476	335077	399938
P35293	Ras-related protein Rab-18	Rab18	32	3	0.759	0.0124838	363752	396653	404281	301117	307397	298953
Q3ULJ0	Glycerol-3-phosphate dehydrogenase 1-like protein	Gpd1l	10	3	0.758	0.194834	160000	282631	128841	127465	121345	100895
Q9QY76	Vesicle-associated membrane protein-associated protein B	Vapb	17	2	0.756	0.174931	666618	780594	529482	503835	457744	596629
Q01768	Nucleoside diphosphate kinase B	Nme2	65	2	0.743	0.905986	282447	678821	642627	526211	437398	477297
P68181	cAMP-dependent protein kinase catalytic subunit beta	Prkacb	19	1	0.741	0.490582	514815	582443	575261	426347	301891	713904
Q3UQS2	Leucine-rich single-pass membrane protein 1	Lsmem1	2	1	0.74	0.834359	318169	385088	432737	567097	284836	275675
Q8BWT1	3-ketoacyl-CoA thiolase, mitochondrial	Acaa2	7	2	0.739	0.706683	156679	192328	78465.3	115728	99289.3	142604
Q7TSJ2	Microtubule-associated protein 6	Map6	146	20	0.738	0.411075	1.94294e+06	3.18035e+06	2.84306e+06	2.53953e+06	2.0981e+06	2.05377e+06
P43276	Histone H1.5	H1-5	10	1	0.737	0.587422	119814	114017	33334.9	197208	70002.8	84068.9
Q91XV3	Brain acid soluble protein 1	Basp1	74	8	0.735	0.725416	2.80711e+06	4.14866e+06	4.84305e+06	4.80588e+06	3.04914e+06	2.98565e+06
P60766	Cell division control protein 42 homolog	Cdc42	28	4	0.732	0.933402	584780	1.37279e+06	1.41523e+06	1.00496e+06	843625	1.4665e+06
Q9EQU5	Protein SET	Set	13	2	0.729	0.487566	149071	215771	277131	155876	220849	157401
Q8K596	Sodium/calcium exchanger 2	Slc8a2	31	5	0.721	0.0942492	380993	457932	564666	346695	330209	318554
P60904	DnaJ homolog subfamily C member 5	Dnajc5	14	3	0.72	0.685087	52684.4	94852.8	97550.8	90230.7	68287.5	57589.2
Q8R001	Microtubule-associated protein RP/EB family member 2	Mapre2	24	5	0.71	0.649324	553839	644250	227738	393192	224671	505920
Q9QUI0	Transforming protein RhoA	Rhoa	50	5	0.708	0.925406	531523	1.74122e+06	1.52319e+06	1.10168e+06	1.05295e+06	1.07877e+06
P80318	T-complex protein 1 subunit gamma	Cct3	2	2	0.703	0.454942	328293	276056	510303	210240	449328	230826
Q05816	Fatty acid-binding protein 5	Fabp5	4	1	0.684	0.157474	263886	227516	445187	179542	226077	180507
Q63810	Calcineurin subunit B type 1	Ppp3r1	5	1	0.681	0.78812	43100.8	116090	127482	104476	79078.3	54573.2
Q91WS0	CDGSH iron-sulfur domain-containing protein 1	Cisd1	39	4	0.68	0.361393	1.08662e+06	1.88395e+06	2.30711e+06	1.4753e+06	1.28035e+06	1.12779e+06
P07356	Annexin A2	Anxa2	25	6	0.678	0.666171	391071	220226	383664	260284	371287	248240
P60122	RuvB-like 1	Ruvbl1	4	2	0.649	0.393154	46657.9	73557.5	85299.3	75606.1	35926.7	47757.4
Q9JM76	Actin-related protein 2/3 complex subunit 3	Arpc3	37	4	0.649	0.260933	144315	214314	186931	189870	113507	121343
O88544	COP9 signalosome complex subunit 4	Cops4	2	1	0.648	0.102288	205521	161804	178566	115787	91141.9	158323
Q5U405	Transmembrane protease serine 13	Tmprss13	2	1	0.634	0.195219	612226	502618	1.03352e+06	573312	146860	387953
P03995	Glial fibrillary acidic protein	Gfap	207	10	0.63	0.28453	5.76377e+07	2.88755e+07	6.20319e+07	2.61184e+07	3.62928e+07	3.76323e+07
P11087	Collagen alpha-1(I) chain	Col1a1	3	1	0.627	0.781363	236801	115402	72970.9	72354.7	45729.3	324530
P23198	Chromobox protein homolog 3	Cbx3	7	1	0.592	0.363932	72679.3	100127	85494	36180.1	50630.3	108641
E9Q557	Desmoplakin	Dsp	42	12	0.575	0.332935	2.68206e+06	1.13984e+06	2.46338e+06	1.09768e+06	1.41714e+06	1.69634e+06
Q7SIG6	Arf-GAP with SH3 domain, ANK repeat and PH domain-containing protein 2	Asap2	10	1	0.57	0.260727	8.81979e+07	4.56388e+07	1.01649e+08	4.41382e+07	5.91555e+07	5.02903e+07
P16390	Potassium voltage-gated channel subfamily A member 3	Kcna3	6	2	0.562	0.10438	147848	150481	139480	83125	40902.2	96457.4
P46471	26S proteasome regulatory subunit 7	Psmc2	5	2	0.561	0.230801	154051	150894	97654.8	126269	84638.3	41878.7
Q9Z0S1	3'(2'),5'-bisphosphate nucleotidase 1	Bpnt1	2	1	0.559	0.727925	21344	41594.7	42352.9	48950.6	22596.5	23250.9
Q9D0J8	Parathymosin	Ptms	6	2	0.534	0.752048	46939.4	94799.4	167966	219030	33564.1	50667.5
Q9D3A9	Protein tweety homolog 1	Ttyh1	16	3	0.528	0.913829	35976.2	183183	86444.5	44241.9	45642.3	220750
Q9DCT2	NADH dehydrogenase	Ndufs3	32	5	0.514	0.000226681	492818	504628	555866	287566	259290	255541
Q02257	Junction plakoglobin	Jup	63	11	0.488	0.583638	2.76179e+06	1.14848e+06	2.43106e+06	1.0787e+06	1.18527e+06	2.87135e+06
Q8BGD9	Eukaryotic translation initiation factor 4B	Eif4b	7	1	0.452	0.027423	98861.8	97386.5	114976	28914.8	52814	44669.8
Q9D0E1	Heterogeneous nuclear ribonucleoprotein M	Hnrnpm	13	2	0.434	0.263221	207290	151349	69681.3	65637.3	16503.3	124908
Q9CXW3	Calcyclin-binding protein	Cacybp	1	1	0.423	0.181608	60510.8	81447.5	54579.8	64568.8	19659.9	25605.8
P99027	60S acidic ribosomal protein P2	Rplp2	1	1	0.373	0.431828	129230	98352.3	35082.4	100774	36707.4	28111.2
P17809	Solute carrier family 2, facilitated glucose transporter member 1	Slc2a1	8	1	0.251	0.467811	167862	199178	708200	45934.5	50056.6	777404
Q8BGZ1	Hippocalcin-like protein 4	Hpcal4	7	1	0.17	0.0622754	111578	256449	207058	99477.3	35252.1	22117.1
