# Supplementary material for: Optochemical profiling of receptor-proximal proteins in vivo in minutes
Source: Research Square preprint supplement (doi:10.21203/rs.3.rs-3418321/v1), 2023-11-14
Supplement: Supplementary file 4 [file 9ca21b9132c98c7b2d20fef1.xlsx]

## Sheet: Legend
Supplementary Table 6
Proteomics data for PhoxID targeting GRID2-proximal proteins using a GRID2 Nb-DBF (n=1 biological replicates x 2 technical replicates)
Sheet name	Description	Comments
S6	All detected proteins	Proteins with unique peptides <2 are excluded from this list

## Sheet: S6. All detected proteins
UniProt ID	Protein	Gene	# PSMs	# unique peptides	Fold change: Nb381-DBF (+) vs. (–)	Abundances (Grouped): Nb381-DBF(+)	Abundances (Grouped): Nb381-DBF(–)
Q61625	Glutamate receptor ionotropic, delta-2	Grid2	114	28	22.774	9.23957e+07	4.05705e+06
Q8VIJ6	Splicing factor, proline- and glutamine-rich	Sfpq	22	6	9.257	4.39243e+06	474523
Q9WTL4	Insulin receptor-related protein	Insrr	4	2	7.853	3.86144e+06	491718
Q9JHG0	Cerebellin-3	Cbln3	9	3	7.705	4.29324e+06	557236
Q61838	Pregnancy zone protein	Pzp	8	5	6.832	1.40157e+06	205138
Q68EF4	Metabotropic glutamate receptor 4	Grm4	15	9	5.993	1.9838e+06	331018
P61922	4-aminobutyrate aminotransferase, mitochondrial	Abat	27	11	5.946	6.86631e+06	1.15487e+06
Q99020	Heterogeneous nuclear ribonucleoprotein A/B	Hnrnpab	3	2	5.194	1.85763e+06	357674
Q8VCM7	Fibrinogen gamma chain	Fgg	56	13	4.894	2.00724e+07	4.10179e+06
P11276	Fibronectin	Fn1	20	11	4.689	3.09346e+06	659725
O35737	Heterogeneous nuclear ribonucleoprotein H	Hnrnph1	10	3	4.385	1.23547e+06	281723
P56959	RNA-binding protein FUS	Fus	4	2	4.273	489456	114549
Q9R171	Cerebellin-1	Cbln1	17	5	4.104	3.29158e+06	802119
Q99K48	Non-POU domain-containing octamer-binding protein	Nono	16	4	4.022	3.12631e+06	777301
O88569	Heterogeneous nuclear ribonucleoproteins A2/B1	Hnrnpa2b1	9	4	4.007	1.16048e+06	289606
P23819	Glutamate receptor 2	Gria2	10	3	3.953	754158	190777
Q9WV02	RNA-binding motif protein, X chromosome	Rbmx	6	3	3.847	676398	175831
E9Q7X7	Neurexin-2	Nrxn2	6	3	3.632	1.17779e+06	324257
Q9CS84	Neurexin-1	Nrxn1	10	6	3.608	2.01613e+06	558818
Q9D0E1	Heterogeneous nuclear ribonucleoprotein M	Hnrnpm	17	8	3.59	1.91856e+06	534481
P97350	Plakophilin-1	Pkp1	14	6	3.49	3.55875e+06	1.01961e+06
P97772	Metabotropic glutamate receptor 1	Grm1	13	7	3.444	2.41874e+06	702213
Q9WV18	Gamma-aminobutyric acid type B receptor subunit 1	Gabbr1	4	2	3.369	281096	83437
E9Q557	Desmoplakin	Dsp	148	47	3.013	5.35304e+07	1.77663e+07
P07724	Albumin	Alb	47	16	2.954	1.61414e+07	5.46415e+06
Q7TSF1	Desmoglein-1-beta	Dsg1b	10	5	2.931	2.89562e+06	987771
Q8K310	Matrin-3	Matr3	19	9	2.762	1.72255e+06	623547
P62754	40S ribosomal protein S6	Rps6	8	3	2.751	944129	343205
P49312	Heterogeneous nuclear ribonucleoprotein A1	Hnrnpa1	7	3	2.648	558878	211035
P05201	Aspartate aminotransferase, cytoplasmic	Got1	17	7	2.503	3.55186e+06	1.41924e+06
Q8BG05	Heterogeneous nuclear ribonucleoprotein A3	Hnrnpa3	43	12	2.427	9.93189e+06	4.09174e+06
Q9D2P8	Myelin-associated oligodendrocyte basic protein	Mobp	13	2	2.356	991612	420855
Q02257	Junction plakoglobin	Jup	91	22	2.307	3.67063e+07	1.59119e+07
Q61656	Probable ATP-dependent RNA helicase DDX5	Ddx5	16	2	2.255	2.91315e+06	1.29187e+06
Q05793	Basement membrane-specific heparan sulfate proteoglycan core protein	Hspg2	4	2	2.135	185888	87069.8
O35633	Vesicular inhibitory amino acid transporter	Slc32a1	12	5	2.114	561427	265542
Q8K596	Sodium/calcium exchanger 2	Slc8a2	4	4	2.086	171976	82442.8
P08551	Neurofilament light polypeptide	Nefl	43	10	2.058	7.74219e+06	3.76169e+06
P07356	Annexin A2	Anxa2	36	10	2.057	4.88941e+06	2.37753e+06
P62259	14-3-3 protein epsilon	Ywhae	18	3	2.034	467897	230061
P80318	T-complex protein 1 subunit gamma	Cct3	9	3	1.97	2.71705e+06	1.379e+06
Q60668	Heterogeneous nuclear ribonucleoprotein D0	Hnrnpd	9	2	1.957	1.80199e+06	920587
Q99JY9	Actin-related protein 3	Actr3	3	2	1.912	720338	376656
Q8C0E2	Vacuolar protein sorting-associated protein 26B	Vps26b	6	3	1.911	1.98278e+06	1.03742e+06
Q925N0	Sideroflexin-5	Sfxn5	6	2	1.888	861583	456431
Q61990	Poly(rC)-binding protein 2	Pcbp2	19	3	1.871	1.7841e+06	953506
Q9EST1	Gasdermin-A	Gsdma	2	2	1.855	279112	150473
Q3UHJ0	AP2-associated protein kinase 1	Aak1	4	4	1.851	407034	219899
Q61792	LIM and SH3 domain protein 1	Lasp1	2	2	1.839	58211.8	31646.7
Q99JY0	Trifunctional enzyme subunit beta, mitochondrial	Hadhb	11	6	1.81	1.64908e+06	910850
P62908	40S ribosomal protein S3	Rps3	17	5	1.808	1.87213e+06	1.03523e+06
Q9WVA3	Mitotic checkpoint protein BUB3	Bub3	5	2	1.795	425645	237064
P42669	Transcriptional activator protein Pur-alpha	Pura	4	3	1.792	710399	396333
P68510	14-3-3 protein eta	Ywhah	19	3	1.79	1.49296e+06	833949
Q9CY27	Very-long-chain enoyl-CoA reductase	Tecr	5	2	1.785	417308	233832
P61255	60S ribosomal protein L26	Rpl26	8	2	1.781	241763	135710
P11983	T-complex protein 1 subunit alpha	Tcp1	9	6	1.778	245895	138313
P54823	Probable ATP-dependent RNA helicase DDX6	Ddx6	5	2	1.725	418848	242843
P62082	40S ribosomal protein S7	Rps7	4	2	1.724	433272	251312
P12970	60S ribosomal protein L7a	Rpl7a	4	2	1.707	524083	307011
P60202	Myelin proteolipid protein	Plp1	84	6	1.706	1.19953e+08	7.03246e+07
P14115	60S ribosomal protein L27a	Rpl27a	5	3	1.703	321820	188926
Q8VEK3	Heterogeneous nuclear ribonucleoprotein U	Hnrnpu	56	12	1.685	9.94132e+06	5.89856e+06
P60335	Poly(rC)-binding protein 1	Pcbp1	26	4	1.683	3.70198e+06	2.19941e+06
Q69ZU6	Thrombospondin type-1 domain-containing protein 7A	Thsd7a	3	3	1.671	96252.6	57597.1
P14733	Lamin-B1	Lmnb1	7	3	1.671	459298	274843
Q9CQI6	Coactosin-like protein	Cotl1	22	7	1.667	6.31405e+06	3.7887e+06
Q8CHC4	Synaptojanin-1	Synj1	4	2	1.666	406143	243791
Q99PU5	Long-chain-fatty-acid--CoA ligase ACSBG1	Acsbg1	29	9	1.654	4.08328e+06	2.46837e+06
Q9WV60	Glycogen synthase kinase-3 beta	Gsk3b	7	3	1.642	147374	89752
Q64521	Glycerol-3-phosphate dehydrogenase, mitochondrial	Gpd2	3	2	1.632	281701	172595
P50247	Adenosylhomocysteinase	Ahcy	8	2	1.622	946754	583548
P62281	40S ribosomal protein S11	Rps11	5	3	1.614	1.46505e+06	907899
P10852	4F2 cell-surface antigen heavy chain	Slc3a2	2	2	1.612	198935	123447
Q9Z204	Heterogeneous nuclear ribonucleoproteins C1/C2	Hnrnpc	4	2	1.609	598478	371955
P32037	Solute carrier family 2, facilitated glucose transporter member 3	Slc2a3	9	4	1.608	1.77142e+06	1.10134e+06
Q8R081	Heterogeneous nuclear ribonucleoprotein L	Hnrnpl	8	4	1.605	1.72944e+06	1.07787e+06
P27659	60S ribosomal protein L3	Rpl3	4	3	1.598	457028	286002
Q9Z2Z6	Mitochondrial carnitine/acylcarnitine carrier protein	Slc25a20	5	2	1.595	381345	239152
P40124	Adenylyl cyclase-associated protein 1	Cap1	13	5	1.591	1.31608e+06	827012
Q9Z1Z2	Serine-threonine kinase receptor-associated protein	Strap	3	2	1.584	242897	153342
Q9WV92	Band 4.1-like protein 3	Epb41l3	22	10	1.583	1.69528e+06	1.07125e+06
P35802	Neuronal membrane glycoprotein M6-a	Gpm6a	19	4	1.583	7.47827e+06	4.72325e+06
P49722	Proteasome subunit alpha type-2	Psma2	2	2	1.583	377664	238503
O70133	ATP-dependent RNA helicase A	Dhx9	14	6	1.577	1.44724e+06	917568
Q8VEM8	Phosphate carrier protein, mitochondrial	Slc25a3	41	8	1.575	1.21957e+07	7.74098e+06
Q9ES97	Reticulon-3	Rtn3	9	2	1.571	1.14134e+06	726668
Q9EPW0	Inositol polyphosphate-4-phosphatase type I A	Inpp4a	6	2	1.57	352496	224502
Q99KP6	Pre-mRNA-processing factor 19	Prpf19	3	2	1.543	285891	185275
O88935	Synapsin-1	Syn1	33	9	1.533	7.24203e+06	4.7247e+06
O35098	Dihydropyrimidinase-related protein 4	Dpysl4	14	7	1.528	2.19162e+06	1.43455e+06
Q9CVB6	Actin-related protein 2/3 complex subunit 2	Arpc2	14	6	1.523	2.06336e+06	1.35504e+06
P97370	Sodium/potassium-transporting ATPase subunit beta-3	Atp1b3	6	4	1.521	728891	479235
P68181	cAMP-dependent protein kinase catalytic subunit beta	Prkacb	3	2	1.506	736516	488949
Q6ZWU9	40S ribosomal protein S27	Rps27	4	2	1.503	1.20025e+06	798610
Q62277	Synaptophysin	Syp	13	2	1.501	7.00552e+06	4.6672e+06
Q61176	Arginase-1	Arg1	4	3	1.5	1.74096e+06	1.16034e+06
Q64444	Carbonic anhydrase 4	Ca4	6	3	1.497	1.4091e+06	941327
P43276	Histone H1.5	H1-5	3	2	1.495	1.52514e+06	1.02002e+06
Q9R0P9	Ubiquitin carboxyl-terminal hydrolase isozyme L1	Uchl1	10	3	1.486	1.53025e+06	1.02994e+06
P46096	Synaptotagmin-1	Syt1	31	6	1.481	2.8618e+06	1.93271e+06
P08752	Guanine nucleotide-binding protein G(i) subunit alpha-2	Gnai2	14	3	1.477	1.058e+06	716126
P10630	Eukaryotic initiation factor 4A-II	Eif4a2	12	2	1.474	2.13276e+06	1.4469e+06
P84091	AP-2 complex subunit mu	Ap2m1	34	10	1.472	8.37311e+06	5.68823e+06
P63005	Platelet-activating factor acetylhydrolase IB subunit beta	Pafah1b1	6	2	1.47	518417	352714
P20152	Vimentin	Vim	29	11	1.467	2.2577e+06	1.53877e+06
O55131	Septin-7	Septin7	20	8	1.455	2.63912e+06	1.8138e+06
P60766	Cell division control protein 42 homolog	Cdc42	23	7	1.455	3.41065e+06	2.34483e+06
P62881	Guanine nucleotide-binding protein subunit beta-5	Gnb5	5	3	1.453	668408	459981
Q640R3	Hepatocyte cell adhesion molecule	Hepacam	11	3	1.452	849453	584964
Q91VR2	ATP synthase subunit gamma, mitochondrial	Atp5f1c	30	7	1.451	4.6278e+06	3.19001e+06
P08553	Neurofilament medium polypeptide	Nefm	59	14	1.448	9.87667e+06	6.82181e+06
Q9DBP5	UMP-CMP kinase	Cmpk1	3	2	1.446	378287	261559
P28652	Calcium/calmodulin-dependent protein kinase type II subunit beta	Camk2b	32	5	1.445	6.55322e+06	4.53411e+06
Q9D0K2	Succinyl-CoA:3-ketoacid coenzyme A transferase 1, mitochondrial	Oxct1	5	2	1.443	267689	185477
Q9D1G1	Ras-related protein Rab-1B	Rab1b	10	2	1.434	3.01138e+06	2.10048e+06
P28571	Sodium- and chloride-dependent glycine transporter 1	Slc6a9	8	2	1.432	761240	531477
Q9Z0E0	Neurochondrin	Ncdn	7	4	1.431	352328	246274
Q922B2	Aspartate--tRNA ligase, cytoplasmic	Dars1	8	5	1.429	251090	175688
Q99JG2	G-protein coupled receptor 37-like 1	Gpr37l1	11	2	1.428	1.77819e+06	1.24566e+06
P61982	14-3-3 protein gamma	Ywhag	24	4	1.427	2.94927e+06	2.06705e+06
P48962	ADP/ATP translocase 1	Slc25a4	178	10	1.425	1.22301e+08	8.58462e+07
Q8VDP6	CDP-diacylglycerol--inositol 3-phosphatidyltransferase	Cdipt	8	2	1.425	757148	531154
Q5SWU9	Acetyl-CoA carboxylase 1	Acaca	51	14	1.416	6.83734e+06	4.82846e+06
Q9QUM9	Proteasome subunit alpha type-6	Psma6	5	2	1.413	777018	549807
Q60900	ELAV-like protein 3	Elavl3	21	4	1.412	1.88191e+06	1.33295e+06
Q3TXX4	Vesicular glutamate transporter 1	Slc17a7	28	5	1.409	6.2224e+06	4.41502e+06
P48774	Glutathione S-transferase Mu 5	Gstm5	8	2	1.409	507064	359989
Q9R1T4	Septin-6	Septin6	17	2	1.404	330048	235087
Q9QYC0	Alpha-adducin	Add1	11	4	1.402	2.04678e+06	1.45982e+06
P23242	Gap junction alpha-1 protein	Gja1	7	3	1.398	831848	595030
Q80TJ1	Calcium-dependent secretion activator 1	Cadps	6	2	1.394	582755	417921
P50396	Rab GDP dissociation inhibitor alpha	Gdi1	71	12	1.391	1.19441e+07	8.5868e+06
Q64332	Synapsin-2	Syn2	21	8	1.387	3.76011e+06	2.71012e+06
P62827	GTP-binding nuclear protein Ran	Ran	29	6	1.385	8.02741e+06	5.79651e+06
P62242	40S ribosomal protein S8	Rps8	13	5	1.384	1.25505e+06	906992
P70372	ELAV-like protein 1	Elavl1	7	4	1.383	2.21979e+06	1.60506e+06
Q8VDM4	26S proteasome non-ATPase regulatory subunit 2	Psmd2	5	2	1.383	279308	201987
Q9CR62	Mitochondrial 2-oxoglutarate/malate carrier protein	Slc25a11	7	3	1.382	905284	655025
P06151	L-lactate dehydrogenase A chain	Ldha	55	12	1.378	1.99209e+07	1.44552e+07
Q9JIS5	Synaptic vesicle glycoprotein 2A	Sv2a	32	8	1.375	5.34164e+06	3.88348e+06
Q9Z2I9	Succinate--CoA ligase	Sucla2	10	3	1.372	697572	508401
Q9DBG3	AP-2 complex subunit beta	Ap2b1	27	5	1.371	1.72737e+06	1.25972e+06
P97427	Dihydropyrimidinase-related protein 1	Crmp1	69	14	1.37	1.5935e+07	1.16334e+07
Q3UMR5	Calcium uniporter protein, mitochondrial	Mcu	6	3	1.36	733541	539375
P62631	Elongation factor 1-alpha 2	Eef1a2	116	5	1.359	4.87213e+07	3.58508e+07
P70296	Phosphatidylethanolamine-binding protein 1	Pebp1	10	3	1.359	1.04912e+06	771759
Q9Z1S5	Neuronal-specific septin-3	Septin3	7	3	1.351	1.16348e+06	861021
P63001	Ras-related C3 botulinum toxin substrate 1	Rac1	29	6	1.35	1.84088e+07	1.36344e+07
P51881	ADP/ATP translocase 2	Slc25a5	137	8	1.348	3.47693e+07	2.58008e+07
Q61885	Myelin-oligodendrocyte glycoprotein	Mog	9	3	1.347	1.97271e+06	1.46435e+06
Q9WUM3	Coronin-1B	Coro1b	5	2	1.347	202032	149979
P63318	Protein kinase C gamma type	Prkcg	69	18	1.34	7.40131e+06	5.52215e+06
O55234	Proteasome subunit beta type-5	Psmb5	5	2	1.334	279248	209301
O89053	Coronin-1A	Coro1a	6	3	1.333	360403	270349
P35293	Ras-related protein Rab-18	Rab18	6	3	1.332	597324	448518
Q8K0S0	Phytanoyl-CoA hydroxylase-interacting protein	Phyhip	26	4	1.327	3.45099e+06	2.6009e+06
Q60597	2-oxoglutarate dehydrogenase complex component E1	Ogdh	33	11	1.326	4.06875e+06	3.06946e+06
P51410	60S ribosomal protein L9	Rpl9	5	3	1.324	990510	747877
O54734	Dolichyl-diphosphooligosaccharide--protein glycosyltransferase 48 kDa subunit	Ddost	5	2	1.32	351968	266578
B9EKR1	Receptor-type tyrosine-protein phosphatase zeta	Ptprz1	5	2	1.32	316987	240085
Q8K2B3	Succinate dehydrogenase	Sdha	42	15	1.319	7.01561e+06	5.31933e+06
P47757	F-actin-capping protein subunit beta	Capzb	24	7	1.316	4.22892e+06	3.21439e+06
Q9R0Q6	Actin-related protein 2/3 complex subunit 1A	Arpc1a	12	2	1.307	1.63275e+06	1.2493e+06
Q9QYB5	Gamma-adducin	Add3	6	2	1.304	725226	556034
Q64518	Sarcoplasmic/endoplasmic reticulum calcium ATPase 3	Atp2a3	33	4	1.3	1.49432e+06	1.14934e+06
P28474	Alcohol dehydrogenase class-3	Adh5	7	3	1.296	564575	435717
Q61553	Fascin	Fscn1	21	6	1.287	2.15992e+06	1.67881e+06
Q6PIE5	Sodium/potassium-transporting ATPase subunit alpha-2	Atp1a2	238	19	1.284	1.73273e+07	1.34898e+07
Q9CPU4	Microsomal glutathione S-transferase 3	Mgst3	6	2	1.282	230843	180061
P56135	ATP synthase subunit f, mitochondrial	Atp5mf	7	2	1.276	361662	283466
P16330	2',3'-cyclic-nucleotide 3'-phosphodiesterase	Cnp	180	25	1.273	7.48272e+07	5.87813e+07
O35643	AP-1 complex subunit beta-1	Ap1b1	33	5	1.273	4.40813e+06	3.46213e+06
Q810U3	Neurofascin	Nfasc	15	7	1.271	1.56103e+06	1.22779e+06
Q9DC69	NADH dehydrogenase	Ndufa9	15	7	1.269	1.05165e+06	828790
Q4VAE3	Transmembrane protein 65	Tmem65	7	3	1.267	232471	183450
Q9EP69	Phosphatidylinositol-3-phosphatase SAC1	Sacm1l	9	4	1.266	955940	755104
Q9WUM4	Coronin-1C	Coro1c	8	5	1.265	778831	615903
Q8R0Y6	Cytosolic 10-formyltetrahydrofolate dehydrogenase	Aldh1l1	4	3	1.262	124340	98512.8
Q9D023	Mitochondrial pyruvate carrier 2	Mpc2	24	4	1.261	2.97191e+06	2.3566e+06
Q9D051	Pyruvate dehydrogenase E1 component subunit beta, mitochondrial	Pdhb	32	8	1.257	2.96902e+06	2.36264e+06
Q9WUM5	Succinate--CoA ligase	Suclg1	26	6	1.257	4.71559e+06	3.75018e+06
Q9D6M3	Mitochondrial glutamate carrier 1	Slc25a22	31	6	1.256	1.09197e+07	8.69301e+06
Q9R0K7	Plasma membrane calcium-transporting ATPase 2	Atp2b2	134	25	1.254	2.99573e+07	2.3897e+07
Q921F4	Heterogeneous nuclear ribonucleoprotein L-like	Hnrnpll	14	5	1.248	991631	794504
P63101	14-3-3 protein zeta/delta	Ywhaz	44	5	1.246	1.11085e+07	8.91487e+06
P39053	Dynamin-1	Dnm1	104	25	1.245	2.99156e+07	2.40351e+07
P48722	Heat shock 70 kDa protein 4L	Hspa4l	7	4	1.245	477364	383373
Q9JJV2	Profilin-2	Pfn2	3	2	1.244	272814	219286
Q6PIC6	Sodium/potassium-transporting ATPase subunit alpha-3	Atp1a3	306	27	1.24	1.43354e+08	1.15613e+08
O88342	WD repeat-containing protein 1	Wdr1	37	11	1.238	7.45369e+06	6.02298e+06
P27546	Microtubule-associated protein 4	Map4	4	2	1.238	345996	279502
Q921F2	TAR DNA-binding protein 43	Tardbp	22	8	1.237	5.64018e+06	4.56126e+06
P20108	Thioredoxin-dependent peroxide reductase, mitochondrial	Prdx3	45	8	1.234	9.80742e+06	7.94472e+06
Q91V61	Sideroflexin-3	Sfxn3	27	7	1.234	3.39411e+06	2.75017e+06
Q61598	Rab GDP dissociation inhibitor beta	Gdi2	51	6	1.233	2.44728e+06	1.98469e+06
Q8VDN2	Sodium/potassium-transporting ATPase subunit alpha-1	Atp1a1	240	22	1.229	3.15673e+07	2.56899e+07
Q60931	Voltage-dependent anion-selective channel protein 3	Vdac3	43	7	1.228	2.1499e+07	1.75044e+07
O55143	Sarcoplasmic/endoplasmic reticulum calcium ATPase 2	Atp2a2	91	23	1.224	1.78762e+07	1.46104e+07
P10126	Elongation factor 1-alpha 1	Eef1a1	108	5	1.224	7.38691e+06	6.03386e+06
P14152	Malate dehydrogenase, cytoplasmic	Mdh1	35	6	1.222	8.08222e+06	6.61339e+06
D3Z7P3	Glutaminase kidney isoform, mitochondrial	Gls	5	3	1.222	315777	258403
P43006	Excitatory amino acid transporter 2	Slc1a2	76	12	1.221	2.00861e+07	1.64568e+07
P16125	L-lactate dehydrogenase B chain	Ldhb	90	16	1.213	4.80171e+07	3.95957e+07
Q5PR73	GTP-binding protein Di-Ras2	Diras2	5	3	1.213	826621	681628
P35486	Pyruvate dehydrogenase E1 component subunit alpha, somatic form, mitochondrial	Pdha1	76	16	1.208	1.29085e+07	1.06866e+07
Q9CYT6	Adenylyl cyclase-associated protein 2	Cap2	8	2	1.208	740397	612973
Q61701	ELAV-like protein 4	Elavl4	15	3	1.207	432134	357987
P51863	V-type proton ATPase subunit d 1	Atp6v0d1	5	3	1.207	1.60395e+06	1.32909e+06
P17426	AP-2 complex subunit alpha-1	Ap2a1	27	5	1.204	3.20037e+06	2.65715e+06
P15532	Nucleoside diphosphate kinase A	Nme1	5	2	1.197	914315	763873
Q8CAQ8	MICOS complex subunit Mic60	Immt	14	6	1.191	1.25898e+06	1.05711e+06
Q9D2G2	Dihydrolipoyllysine-residue succinyltransferase component of 2-oxoglutarate dehydrogenase complex, mitochondrial	Dlst	15	4	1.19	3.18268e+06	2.675e+06
P40142	Transketolase	Tkt	35	9	1.189	2.7036e+06	2.27436e+06
Q60930	Voltage-dependent anion-selective channel protein 2	Vdac2	54	9	1.183	2.93897e+07	2.48484e+07
Q9DB77	Cytochrome b-c1 complex subunit 2, mitochondrial	Uqcrc2	15	4	1.18	835037	707749
P68040	Receptor of activated protein C kinase 1	Rack1	14	6	1.179	1.46439e+06	1.24206e+06
Q03265	ATP synthase subunit alpha, mitochondrial	Atp5f1a	137	25	1.176	6.86335e+07	5.83618e+07
Q61171	Peroxiredoxin-2	Prdx2	89	10	1.174	4.26922e+07	3.63646e+07
G5E829	Plasma membrane calcium-transporting ATPase 1	Atp2b1	69	4	1.172	1.85469e+06	1.58191e+06
P17427	AP-2 complex subunit alpha-2	Ap2a2	21	3	1.168	376149	322151
Q8QZT1	Acetyl-CoA acetyltransferase, mitochondrial	Acat1	40	11	1.164	8.43149e+06	7.24394e+06
P14231	Sodium/potassium-transporting ATPase subunit beta-2	Atp1b2	53	10	1.162	1.44957e+07	1.24737e+07
P62245	40S ribosomal protein S15a	Rps15a	10	3	1.162	1.95423e+06	1.68217e+06
Q8K0U4	Heat shock 70 kDa protein 12A	Hspa12a	9	4	1.16	604418	520884
P14094	Sodium/potassium-transporting ATPase subunit beta-1	Atp1b1	42	7	1.157	2.45448e+07	2.12201e+07
P52480	Pyruvate kinase PKM	Pkm	128	26	1.156	3.28416e+07	2.84061e+07
P17710	Hexokinase-1	Hk1	96	26	1.156	1.97721e+07	1.71034e+07
P16858	Glyceraldehyde-3-phosphate dehydrogenase	Gapdh	238	15	1.154	1.47486e+08	1.27808e+08
P63011	Ras-related protein Rab-3A	Rab3a	52	6	1.154	1.86408e+07	1.61524e+07
Q8BZ98	Dynamin-3	Dnm3	29	2	1.153	1.34099e+06	1.16286e+06
P11499	Heat shock protein HSP 90-beta	Hsp90ab1	60	10	1.152	8.99182e+06	7.80466e+06
Q9CZB0	Succinate dehydrogenase cytochrome b560 subunit, mitochondrial	Sdhc	6	2	1.148	279114	243042
P31648	Sodium- and chloride-dependent GABA transporter 1	Slc6a1	9	4	1.145	3.219e+06	2.81138e+06
P47754	F-actin-capping protein subunit alpha-2	Capza2	9	3	1.14	1.31206e+06	1.15132e+06
P62267	40S ribosomal protein S23	Rps23	7	2	1.137	398263	350272
P53994	Ras-related protein Rab-2A	Rab2a	15	5	1.134	3.37435e+06	2.97455e+06
P10853	Histone H2B type 1-F/J/L	H2bc7	19	3	1.134	6.10349e+06	5.38059e+06
Q791V5	Mitochondrial carrier homolog 2	Mtch2	17	5	1.13	3.74471e+06	3.31462e+06
P46460	Vesicle-fusing ATPase	Nsf	87	23	1.129	1.17899e+07	1.04407e+07
P46097	Synaptotagmin-2	Syt2	17	5	1.126	2.43262e+06	2.16077e+06
Q9CXW4	60S ribosomal protein L11	Rpl11	11	3	1.126	1.83024e+06	1.62575e+06
Q8R366	Immunoglobulin superfamily member 8	Igsf8	14	4	1.122	1.13858e+06	1.01439e+06
P59999	Actin-related protein 2/3 complex subunit 4	Arpc4	10	4	1.122	1.54049e+06	1.37337e+06
P62874	Guanine nucleotide-binding protein G(I)/G(S)/G(T) subunit beta-1	Gnb1	49	5	1.12	1.37861e+07	1.23097e+07
P47857	ATP-dependent 6-phosphofructokinase, muscle type	Pfkm	85	19	1.115	1.43047e+07	1.28325e+07
P43274	Histone H1.4	H1-4	30	2	1.115	6.19761e+06	5.55919e+06
Q91V12	Cytosolic acyl coenzyme A thioester hydrolase	Acot7	42	9	1.114	9.52095e+06	8.54998e+06
P35278	Ras-related protein Rab-5C	Rab5c	14	2	1.112	1.84931e+06	1.66292e+06
Q9CQD1	Ras-related protein Rab-5A	Rab5a	19	2	1.112	901382	810909
Q9Z2W8	Glutamate receptor 4	Gria4	15	3	1.109	858537	773921
Q9WUA3	ATP-dependent 6-phosphofructokinase, platelet type	Pfkp	14	5	1.108	1.05522e+06	952106
P28661	Septin-4	Septin4	3	2	1.108	338346	305380
O08749	Dihydrolipoyl dehydrogenase, mitochondrial	Dld	4	2	1.103	167539	151924
Q8C8R3	Ankyrin-2	Ank2	21	9	1.102	1.29856e+06	1.17819e+06
Q8CI94	Glycogen phosphorylase, brain form	Pygb	52	17	1.101	4.04429e+06	3.67487e+06
C0HKE3	Histone H2A type 1-D	H2ac7	14	3	1.096	5.11709e+06	4.66722e+06
P68404	Protein kinase C beta type	Prkcb	6	2	1.096	205408	187492
Q8C1B7	Septin-11	Septin11	40	5	1.092	8.14408e+06	7.45735e+06
Q8R127	Saccharopine dehydrogenase-like oxidoreductase	Sccpdh	10	4	1.092	889046	813830
Q80SW1	S-adenosylhomocysteine hydrolase-like protein 1	Ahcyl1	50	15	1.091	1.30647e+07	1.19706e+07
P18872	Guanine nucleotide-binding protein G(o) subunit alpha	Gnao1	65	12	1.089	3.28762e+07	3.01805e+07
Q60932	Voltage-dependent anion-selective channel protein 1	Vdac1	100	15	1.086	4.75011e+07	4.372e+07
P46660	Alpha-internexin	Ina	37	8	1.086	3.55802e+06	3.27559e+06
Q8BH59	Electrogenic aspartate/glutamate antiporter SLC25A12, mitochondrial	Slc25a12	14	6	1.086	1.79001e+06	1.64753e+06
Q99MR8	Methylcrotonoyl-CoA carboxylase subunit alpha, mitochondrial	Mccc1	275	38	1.083	1.1863e+08	1.09506e+08
Q8BG39	Synaptic vesicle glycoprotein 2B	Sv2b	6	2	1.083	640541	591398
Q6PHN9	Ras-related protein Rab-35	Rab35	7	3	1.082	2.98724e+06	2.76184e+06
P61979	Heterogeneous nuclear ribonucleoprotein K	Hnrnpk	9	7	1.073	759511	708047
Q6WVG3	BTB/POZ domain-containing protein KCTD12	Kctd12	13	5	1.072	1.46793e+06	1.36949e+06
Q9CQQ7	ATP synthase F(0) complex subunit B1, mitochondrial	Atp5pb	6	4	1.072	309168	288373
P24369	Peptidyl-prolyl cis-trans isomerase B	Ppib	19	6	1.071	2.70117e+06	2.52107e+06
Q9DCP2	Sodium-coupled neutral amino acid transporter 3	Slc38a3	6	2	1.067	280120	262493
Q9D0M5	Dynein light chain 2, cytoplasmic	Dynll2	10	3	1.065	1.50084e+06	1.40869e+06
P97300	Neuroplastin	Nptn	15	2	1.063	1.14245e+06	1.07453e+06
P12658	Calbindin	Calb1	19	7	1.062	2.35036e+06	2.21357e+06
Q91V41	Ras-related protein Rab-14	Rab14	10	4	1.062	1.45852e+06	1.37294e+06
P58252	Elongation factor 2	Eef2	43	15	1.061	5.00777e+06	4.71843e+06
P15105	Glutamine synthetase	Glul	53	13	1.061	1.37388e+07	1.29528e+07
Q8CHH9	Septin-8	Septin8	34	6	1.06	3.73186e+06	3.52207e+06
P35979	60S ribosomal protein L12	Rpl12	12	3	1.06	1.39094e+06	1.31162e+06
O08709	Peroxiredoxin-6	Prdx6	27	8	1.058	2.09239e+06	1.97806e+06
Q8BJI1	Sodium-dependent neutral amino acid transporter SLC6A17	Slc6a17	4	2	1.057	349146	330355
Q6PHZ2	Calcium/calmodulin-dependent protein kinase type II subunit delta	Camk2d	19	2	1.057	284068	268847
Q99KI0	Aconitate hydratase, mitochondrial	Aco2	110	22	1.055	3.30114e+07	3.12998e+07
Q62059	Versican core protein	Vcan	3	2	1.053	66153.6	62813.7
Q9DC70	NADH dehydrogenase	Ndufs7	5	2	1.049	697028	664552
P10493	Nidogen-1	Nid1	10	5	1.048	2.15965e+06	2.06128e+06
Q9CZU6	Citrate synthase, mitochondrial	Cs	24	7	1.047	2.89202e+06	2.76252e+06
Q9CZ13	Cytochrome b-c1 complex subunit 1, mitochondrial	Uqcrc1	43	13	1.037	9.23379e+06	8.90381e+06
P70202	Latexin	Lxn	31	4	1.037	2.22601e+07	2.14645e+07
P63328	Protein phosphatase 3 catalytic subunit alpha	Ppp3ca	5	3	1.035	471999	456130
Q91YT0	NADH dehydrogenase	Ndufv1	19	9	1.025	2.52596e+06	2.46521e+06
P62806	Histone H4	H4c1	41	7	1.025	1.55705e+07	1.51946e+07
Q8BGH2	Sorting and assembly machinery component 50 homolog	Samm50	20	8	1.022	2.60763e+06	2.55262e+06
P18760	Cofilin-1	Cfl1	19	6	1.022	3.07601e+06	3.00953e+06
Q91ZA3	Propionyl-CoA carboxylase alpha chain, mitochondrial	Pcca	370	40	1.02	1.6797e+08	1.64604e+08
Q61316	Heat shock 70 kDa protein 4	Hspa4	15	8	1.016	1.5063e+06	1.48216e+06
P11881	Inositol 1,4,5-trisphosphate receptor type 1	Itpr1	145	43	1.011	2.26197e+07	2.23679e+07
Q8R164	Valacyclovir hydrolase	Bphl	3	2	1.01	294269	291397
Q9CX86	Heterogeneous nuclear ribonucleoprotein A0	Hnrnpa0	13	4	1.008	1.49975e+06	1.4879e+06
P05063	Fructose-bisphosphate aldolase C	Aldoc	97	15	1.006	1.65022e+07	1.63995e+07
Q8VCT3	Aminopeptidase B	Rnpep	3	2	1.006	365168	362874
P56399	Ubiquitin carboxyl-terminal hydrolase 5	Usp5	5	2	1.005	392338	390257
Q64133	Amine oxidase	Maoa	8	3	1.004	226651	225683
P99029	Peroxiredoxin-5, mitochondrial	Prdx5	7	5	1.002	820473	818536
Q9DBJ1	Phosphoglycerate mutase 1	Pgam1	29	8	1	4.27492e+06	4.2746e+06
O08599	Syntaxin-binding protein 1	Stxbp1	83	20	0.999	2.45195e+07	2.45347e+07
P07901	Heat shock protein HSP 90-alpha	Hsp90aa1	35	10	0.999	4.06834e+06	4.07273e+06
Q91V14	Solute carrier family 12 member 5	Slc12a5	34	12	0.993	4.98545e+06	5.02164e+06
O54991	Contactin-associated protein 1	Cntnap1	7	3	0.992	530782	535094
Q9Z1Q2	Phosphatidylserine lipase ABHD16A	Abhd16a	2	2	0.992	267112	269290
P12382	ATP-dependent 6-phosphofructokinase, liver type	Pfkl	30	2	0.99	201611	203668
P28651	Carbonic anhydrase-related protein	Ca8	55	9	0.989	1.18248e+07	1.19613e+07
O08553	Dihydropyrimidinase-related protein 2	Dpysl2	83	15	0.985	1.21009e+07	1.22851e+07
P17182	Alpha-enolase	Eno1	55	12	0.983	9.95633e+06	1.01259e+07
Q9D6F9	Tubulin beta-4A chain	Tubb4a	268	5	0.979	6.24302e+06	6.37721e+06
Q99PJ0	Neurotrimin	Ntm	8	2	0.977	581377	595273
P13595	Neural cell adhesion molecule 1	Ncam1	41	15	0.976	7.62945e+06	7.81785e+06
Q0VEJ0	Centrosomal protein of 76 kDa	Cep76	5	2	0.976	105403	107952
P61027	Ras-related protein Rab-10	Rab10	17	3	0.974	1.32511e+06	1.36026e+06
P02301	Histone H3.3C	H3-5	10	3	0.973	9.32733e+06	9.58369e+06
P13707	Glycerol-3-phosphate dehydrogenase	Gpd1	10	4	0.969	1.51e+06	1.5583e+06
O55023	Inositol monophosphatase 1	Impa1	4	2	0.968	334570	345643
Q8BMF4	Dihydrolipoyllysine-residue acetyltransferase component of pyruvate dehydrogenase complex, mitochondrial	Dlat	35	8	0.965	4.14675e+06	4.29688e+06
P10922	Histone H1.0	H1-0	6	3	0.965	1.09553e+06	1.13535e+06
P35803	Neuronal membrane glycoprotein M6-b	Gpm6b	7	2	0.965	1.05762e+06	1.09589e+06
P10649	Glutathione S-transferase Mu 1	Gstm1	8	3	0.957	1.45065e+06	1.51514e+06
P12960	Contactin-1	Cntn1	60	17	0.956	5.11879e+06	5.35339e+06
P47911	60S ribosomal protein L6	Rpl6	6	2	0.956	462827	484085
Q9QUI0	Transforming protein RhoA	Rhoa	27	6	0.952	4.46098e+06	4.68419e+06
Q05920	Pyruvate carboxylase, mitochondrial	Pc	493	53	0.951	2.26166e+08	2.37738e+08
O88343	Electrogenic sodium bicarbonate cotransporter 1	Slc4a4	30	9	0.951	3.27445e+06	3.44368e+06
Q11011	Puromycin-sensitive aminopeptidase	Npepps	9	5	0.95	684041	720023
Q9JHU4	Cytoplasmic dynein 1 heavy chain 1	Dync1h1	20	13	0.947	1.56655e+06	1.65397e+06
Q68FD5	Clathrin heavy chain 1	Cltc	175	43	0.939	2.84567e+07	3.02982e+07
Q9D8N0	Elongation factor 1-gamma	Eef1g	10	3	0.938	1.3891e+06	1.48077e+06
Q9CR68	Cytochrome b-c1 complex subunit Rieske, mitochondrial	Uqcrfs1	20	4	0.932	2.06814e+06	2.21863e+06
Q62425	Cytochrome c oxidase subunit NDUFA4	Ndufa4	11	3	0.93	2.03494e+06	2.18717e+06
Q8K0T0	Reticulon-1	Rtn1	13	2	0.924	585443	633893
Q9Z1N5	Spliceosome RNA helicase Ddx39b	Ddx39b	30	9	0.922	3.02089e+06	3.27521e+06
P62880	Guanine nucleotide-binding protein G(I)/G(S)/G(T) subunit beta-2	Gnb2	39	3	0.915	2.73015e+06	2.98504e+06
P14211	Calreticulin	Calr	9	5	0.91	824990	906547
Q99LC5	Electron transfer flavoprotein subunit alpha, mitochondrial	Etfa	8	3	0.908	303933	334713
O35609	Secretory carrier-associated membrane protein 3	Scamp3	5	2	0.908	291760	321491
P56564	Excitatory amino acid transporter 1	Slc1a3	159	6	0.907	5.47162e+07	6.03224e+07
Q80XN0	D-beta-hydroxybutyrate dehydrogenase, mitochondrial	Bdh1	10	4	0.907	638225	703975
P26043	Radixin	Rdx	9	5	0.9	787685	875570
P17183	Gamma-enolase	Eno2	20	3	0.899	398149	443099
Q9Z2H5	Band 4.1-like protein 1	Epb41l1	9	4	0.891	304934	342159
Q01853	Transitional endoplasmic reticulum ATPase	Vcp	14	6	0.887	335640	378233
Q62261	Spectrin beta chain, non-erythrocytic 1	Sptbn1	9	5	0.883	445091	503872
P56480	ATP synthase subunit beta, mitochondrial	Atp5f1b	37	13	0.882	5.04711e+06	5.71955e+06
Q02053	Ubiquitin-like modifier-activating enzyme 1	Uba1	8	3	0.882	550151	624015
Q8K2C9	Very-long-chain (3R)-3-hydroxyacyl-CoA dehydratase 3	Hacd3	5	2	0.88	145922	165810
P50516	V-type proton ATPase catalytic subunit A	Atp6v1a	23	11	0.877	2.42032e+06	2.7613e+06
Q9EQF6	Dihydropyrimidinase-related protein 5	Dpysl5	13	5	0.875	616720	705140
Q7TMM9	Tubulin beta-2A chain	Tubb2a	277	4	0.868	6.16332e+06	7.0978e+06
Q99PT1	Rho GDP-dissociation inhibitor 1	Arhgdia	23	7	0.858	3.99904e+06	4.66267e+06
Q8C0M9	Isoaspartyl peptidase/L-asparaginase	Asrgl1	14	6	0.857	736159	858549
Q9CYH2	Peroxiredoxin-like 2A	Prxl2a	5	2	0.854	441849	517522
Q8BYI9	Tenascin-R	Tnr	30	11	0.85	2.86818e+06	3.37288e+06
P70704	Phospholipid-transporting ATPase IA	Atp8a1	4	3	0.847	336538	397350
Q8BFR5	Elongation factor Tu, mitochondrial	Tufm	10	4	0.841	774309	920645
P05202	Aspartate aminotransferase, mitochondrial	Got2	40	10	0.839	4.8803e+06	5.81981e+06
P62814	V-type proton ATPase subunit B, brain isoform	Atp6v1b2	31	8	0.835	1.9206e+06	2.29911e+06
P04370	Myelin basic protein	Mbp	33	4	0.835	5.38544e+06	6.4494e+06
P51150	Ras-related protein Rab-7a	Rab7a	27	6	0.832	3.92557e+06	4.71621e+06
Q5U458	DnaJ homolog subfamily C member 11	Dnajc11	5	2	0.802	121220	151063
O35544	Excitatory amino acid transporter 4	Slc1a6	99	5	0.791	1.97774e+06	2.5005e+06
Q9D6R2	Isocitrate dehydrogenase	Idh3a	5	3	0.782	392203	501463
P63017	Heat shock cognate 71 kDa protein	Hspa8	88	19	0.778	1.54433e+07	1.98558e+07
P08249	Malate dehydrogenase, mitochondrial	Mdh2	104	14	0.775	2.42434e+07	3.12836e+07
P68369	Tubulin alpha-1A chain	Tuba1a	225	5	0.775	7.03855e+07	9.08247e+07
Q5M8N0	CB1 cannabinoid receptor-interacting protein 1	Cnrip1	12	3	0.764	1.28229e+06	1.67939e+06
P99024	Tubulin beta-5 chain	Tubb5	256	5	0.755	5.94642e+07	7.87498e+07
P61205	ADP-ribosylation factor 3	Arf3	54	5	0.746	7.84756e+06	1.05222e+07
P02088	Hemoglobin subunit beta-1	Hbb-b1	22	8	0.719	3.42552e+06	4.76281e+06
P09411	Phosphoglycerate kinase 1	Pgk1	19	7	0.717	2.49072e+06	3.4733e+06
Q9Z1G4	V-type proton ATPase 116 kDa subunit a 1	Atp6v0a1	50	15	0.71	4.29043e+06	6.04622e+06
Q9ERD7	Tubulin beta-3 chain	Tubb3	185	6	0.703	1.63697e+06	2.32912e+06
Q04447	Creatine kinase B-type	Ckb	73	13	0.702	1.09834e+07	1.56424e+07
P00405	Cytochrome c oxidase subunit 2	Mtco2	14	3	0.702	2.31941e+06	3.30173e+06
Q91WC3	Long-chain-fatty-acid--CoA ligase 6	Acsl6	8	5	0.696	713560	1.02492e+06
P16546	Spectrin alpha chain, non-erythrocytic 1	Sptan1	36	17	0.693	1.86041e+06	2.68514e+06
P38647	Stress-70 protein, mitochondrial	Hspa9	5	3	0.684	115662	169168
Q99N28	Cell adhesion molecule 3	Cadm3	9	3	0.676	392135	580045
P17751	Triosephosphate isomerase	Tpi1	22	10	0.672	3.60863e+06	5.37173e+06
Q9DB20	ATP synthase subunit O, mitochondrial	Atp5po	13	4	0.659	1.14025e+06	1.72912e+06
Q9Z0P5	Twinfilin-2	Twf2	2	2	0.657	85612.7	130382
P68368	Tubulin alpha-4A chain	Tuba4a	216	5	0.631	8.16907e+06	1.29501e+07
Q9DCT2	NADH dehydrogenase	Ndufs3	5	3	0.61	364757	598231
P42932	T-complex protein 1 subunit theta	Cct8	3	2	0.604	117821	195050
P55088	Aquaporin-4	Aqp4	9	2	0.597	1.56289e+06	2.61939e+06
P30275	Creatine kinase U-type, mitochondrial	Ckmt1	10	4	0.592	243496	411612
Q9D0M3	Cytochrome c1, heme protein, mitochondrial	Cyc1	9	3	0.507	489488	965449
Q9CQR4	Acyl-coenzyme A thioesterase 13	Acot13	8	2	0.479	242180	505203
Q9D172	Glutamine amidotransferase-like class 1 domain-containing protein 3, mitochondrial	Gatd3	10	4	0.441	481800	1.09282e+06
P70404	Isocitrate dehydrogenase	Idh3g	4	2	0.435	57492.8	132127
Q91VD9	NADH-ubiquinone oxidoreductase 75 kDa subunit, mitochondrial	Ndufs1	10	5	0.41	77012.3	187777
P61264	Syntaxin-1B	Stx1b	6	3	0.405	227206	560954
P51660	Peroxisomal multifunctional enzyme type 2	Hsd17b4	8	4	0.299	43836.2	146821
Q9QYG0	Protein NDRG2	Ndrg2	8	2	0.296	219564	742286
O35129	Prohibitin-2	Phb2	8	3	0.263	65449.3	249095
Q810U4	Neuronal cell adhesion molecule	Nrcam	9	4	0.175	69462.7	397365
