# Supplementary material for: Optochemical profiling of receptor-proximal proteins in vivo in minutes
Source: Research Square preprint supplement (doi:10.21203/rs.3.rs-3418321/v1), 2023-11-14
Supplement: Supplementary file 5 [file a180c97b2b0daeb1792c455f.xlsx]

## Sheet: Legend
Supplementary Table 5
Proteomics data for PhoxID targeting AMPAR-proximal proteins in P8, P13, and 5-week-old mice (integrated data from n=3 biological replicates x 2 technical replicates)
Sheet name	Description	Comments
S5-1	P8, hit proteins only	Proteins with unique peptides <2 are excluded from the list
S5-2	P13, hit proteins only	"
S5-3	5 weeks, hit proteins only	"
S5-4	Subset of proteins with higher PhoxID fold changes in P8/P13 than at 5 weeks	Proteins annotated to the mitochondrion (GO:0005739) or nucleus (GO:0005634), but not cell-peripheral terms (see Supplementary Note for relevant GO terms ) are excluded
S5-5	P8, all detected proteins	Proteins with unique peptides <2 are excluded from the list
S5-6	P13, all detected proteins	"
S5-7	5 weeks, all detected proteins	"

## Sheet: S5-1. P8, hits
UniProt ID	Protein	Gene	# PSMs	# unique peptides	Median fold change: PhoxID with compound 1 vs. 2	Fold change p-value	Abundances (Grouped): Compound 2, Bio. Rep. 1	Abundances (Grouped): Compound 2, Bio. Rep. 2	Abundances (Grouped): Compound 2, Bio. Rep. 3	Abundances (Grouped): Compound 1, Bio. Rep. 1	Abundances (Grouped): Compound 1, Bio. Rep. 2	Abundances (Grouped): Compound 1, Bio. Rep. 3	Interaction reference
P0C192	Leucine-rich repeat-containing protein 4B	Lrrc4b	14	4	8.426	0.012121	139251	158810	79580.5	1.26534e+06	1.17327e+06	442169	STRING 11.5
Q9Z2W8	Glutamate receptor 4	Gria4	17	2	6.879	0.00751247	53512.2	90712.8	65844.1	643824	452943	261286	STRING 11.5
P23819	Glutamate receptor 2	Gria2	4	2	4.871	0.0141816	33731.8	34170.8	39553.6	166444	234412	113650	STRING 11.5
P02469	Laminin subunit beta-1	Lamb1	5	3	4.641	0.00304674	63989.9	56801.5	86411.7	325376	296997	194314	STRING 11.5
A2ASQ1	Agrin	Agrn	11	5	3.561	0.00665563	172335	165263	96613	600106	588528	370986	STRING 11.5
Q8BYM5	Neuroligin-3	Nlgn3	7	2	3.411	0.0177626	171463	106187	89379.5	362179	437993	357135	STRING 11.5
Q05793	Basement membrane-specific heparan sulfate proteoglycan core protein	Hspg2	71	25	3.243	0.00771887	1.17584e+06	1.44109e+06	891895	5.34157e+06	3.81382e+06	2.81874e+06	STRING 11.5
Q9Z2W9	Glutamate receptor 3	Gria3	12	2	3.137	0.00669262	202801	163440	272479	853565	636285	491248	STRING 11.5
Q04857	Collagen alpha-1(VI) chain	Col6a1	5	2	2.89	0.0416608	32444.9	52183.6	32823.7	241722	94869.3	93626.9	STRING 11.5
Q61292	Laminin subunit beta-2	Lamb2	18	8	2.85	0.0209074	208673	220618	164236	965828	594622	454782	STRING 11.5
P55066	Neurocan core protein	Ncan	45	12	2.837	0.0185979	988880	759419	505456	2.32971e+06	2.15453e+06	1.43131e+06	STRING 11.5
O88322	Nidogen-2	Nid2	36	10	2.442	0.0469729	698971	873498	329592	2.28264e+06	1.70679e+06	1.30966e+06	STRING 11.5
Q8BYI9	Tenascin-R	Tnr	30	8	2.417	0.0444852	574781	698522	314824	1.5398e+06	1.26096e+06	1.38937e+06	STRING 11.5
Q62059	Versican core protein	Vcan	32	7	2.389	0.0412997	764673	795428	368567	1.82687e+06	2.06976e+06	1.77165e+06	Saroja et al. J Neurochem. 2014;130(6):797-804.
P10493	Nidogen-1	Nid1	89	18	2.363	0.00748019	1.92881e+06	2.21506e+06	2.41118e+06	5.6902e+06	5.23323e+06	3.89808e+06	STRING 11.5
Q80YX1	Tenascin	Tnc	224	30	2.355	0.0151893	8.39618e+06	6.27976e+06	5.31596e+06	1.47915e+07	1.50704e+07	1.08257e+07	STRING 11.5
Q8R2Y2	Cell surface glycoprotein MUC18	Mcam	4	2	2.162	0.00948194	61300.3	72643.1	51528.5	176419	132508	112425	STRING 11.5
Q9QYS2	Metabotropic glutamate receptor 3	Grm3	78	17	2.09	0.0308328	2.40539e+06	2.45835e+06	1.36175e+06	5.45804e+06	5.02671e+06	3.42865e+06	STRING 11.5
P12960	Contactin-1	Cntn1	390	40	1.887	0.032783	2.30267e+07	2.03886e+07	1.65644e+07	3.84835e+07	4.1258e+07	2.65851e+07	STRING 11.5
E9Q7X7	Neurexin-2	Nrxn2	7	2	1.87	0.0361809	157771	152360	115695	317554	284959	191916	STRING 11.5
P28571	Sodium- and chloride-dependent glycine transporter 1	Slc6a9	13	3	1.759	0.0190702	235305	270868	193842	413922	443487	322127	STRING 11.5

## Sheet: S5-2. P13, hits
UniProt ID	Protein	Gene	# PSMs	# unique peptides	Median fold change: PhoxID with compound 1 vs. 2	Fold change p-value	Abundances (Grouped): Compound 2, Bio. Rep. 1	Abundances (Grouped): Compound 2, Bio. Rep. 2	Abundances (Grouped): Compound 2, Bio. Rep. 3	Abundances (Grouped): Compound 1, Bio. Rep. 1	Abundances (Grouped): Compound 1, Bio. Rep. 2	Abundances (Grouped): Compound 1, Bio. Rep. 3	Interaction reference
Q9CQM9	Glutaredoxin-3	Glrx3	5	2	18.775	0.0228592	11387.6	42375.6	12566.1	204042	235933	270939	STRING 11.5
Q9Z2W8	Glutamate receptor 4	Gria4	188	19	16.509	2.95073e-05	771542	626187	573771	1.20498e+07	9.73341e+06	1.03375e+07	STRING 11.5
O88998	Noelin	Olfm1	35	5	14.05	7.05804e-05	130950	113833	118020	1.79464e+06	1.38185e+06	1.65817e+06	STRING 11.5
Q68EF4	Metabotropic glutamate receptor 4	Grm4	22	6	12.773	5.79584e-05	66603.8	52572.4	51034.3	705346	671518	514362	STRING 11.5
Q61625	Glutamate receptor ionotropic, delta-2	Grid2	175	25	11.101	0.00023839	1.3856e+06	1.06518e+06	1.0311e+06	1.31185e+07	1.18242e+07	1.12345e+07	STRING 11.5
Q9Z2W9	Glutamate receptor 3	Gria3	119	17	10.791	6.13089e-05	500236	363477	390540	5.1571e+06	4.21418e+06	3.98283e+06	STRING 11.5
Q9CPW0	Contactin-associated protein-like 2	Cntnap2	135	28	10.396	4.78494e-05	918715	707088	751688	7.81472e+06	7.99412e+06	6.6977e+06	STRING 11.5
P23819	Glutamate receptor 2	Gria2	86	15	10.311	0.000183472	631453	449407	528673	6.21034e+06	5.45125e+06	5.17229e+06	STRING 11.5
Q9JLB9	Nectin-3	Nectin3	15	3	9.293	0.000493008	50200.7	33979.3	31087.6	355451	315767	233865	STRING 11.5
P09055	Integrin beta-1	Itgb1	63	16	9.177	0.00050717	648858	397155	461265	4.23307e+06	4.42802e+06	3.12468e+06	STRING 11.5
Q69ZK9	Neuroligin-2	Nlgn2	32	7	9.055	0.00170024	232953	120156	155333	1.57681e+06	1.40661e+06	850978	STRING 11.5
Q8BYI9	Tenascin-R	Tnr	228	30	8.234	0.000988124	1.58692e+06	2.07067e+06	1.11735e+06	1.58554e+07	1.30659e+07	9.93288e+06	STRING 11.5
P0C192	Leucine-rich repeat-containing protein 4B	Lrrc4b	13	4	8.108	0.00135466	44672.8	24698.3	28844.9	233868	279094	183251	STRING 11.5
Q810U4	Neuronal cell adhesion molecule	Nrcam	179	24	7.818	0.00203839	2.19861e+06	1.21578e+06	1.33328e+06	1.11115e+07	1.0423e+07	7.44065e+06	STRING 11.5
Q9Z218	Dipeptidyl aminopeptidase-like protein 6	Dpp6	126	17	7.767	0.0125677	1.51756e+06	1.23077e+06	941513	9.55946e+06	1.15261e+07	4.36499e+06	STRING 11.5
Q8R2Y2	Cell surface glycoprotein MUC18	Mcam	39	12	7.647	0.00102206	255695	214620	194113	1.734e+06	1.64113e+06	1.10799e+06	STRING 11.5
P02468	Laminin subunit gamma-1	Lamc1	110	24	7.575	9.17401e-05	616849	461845	540776	4.0965e+06	4.29548e+06	3.5407e+06	STRING 11.5
Q6PHS9	Voltage-dependent calcium channel subunit alpha-2/delta-2	Cacna2d2	84	19	7.571	0.00140665	413421	395328	407153	3.13466e+06	3.08262e+06	2.42943e+06	STRING 11.5
Q9QZF2	Glypican-1	Gpc1	8	6	7.548	0.0202084	103805	46294.7	45545	351206	349454	289472	STRING 11.5
Q05793	Basement membrane-specific heparan sulfate proteoglycan core protein	Hspg2	278	51	7.004	0.00575182	2.02419e+06	1.34367e+06	1.29008e+06	9.1197e+06	9.41095e+06	9.61055e+06	STRING 11.5
P97772	Metabotropic glutamate receptor 1	Grm1	50	14	6.9	0.017293	717409	344362	369042	2.64016e+06	2.54634e+06	2.53013e+06	STRING 11.5
Q9JHG0	Cerebellin-3	Cbln3	17	3	6.818	0.000606508	115308	122219	84279.6	862915	786116	702632	STRING 11.5
P02469	Laminin subunit beta-1	Lamb1	64	19	6.783	0.000704923	226903	215752	155720	1.57823e+06	1.46351e+06	1.28934e+06	STRING 11.5
Q62443	Neuronal pentraxin-1	Nptx1	31	11	6.645	0.00124955	255867	151824	229077	1.72516e+06	987573	1.52211e+06	STRING 11.5
A2ASQ1	Agrin	Agrn	92	22	6.622	0.000505876	398799	297332	385212	2.55098e+06	2.59409e+06	1.75375e+06	STRING 11.5
O88322	Nidogen-2	Nid2	126	21	6.506	0.00658843	691248	475113	384487	2.8447e+06	3.09121e+06	3.25663e+06	STRING 11.5
Q9JIF0	Protein arginine N-methyltransferase 1	Prmt1	21	4	6.426	0.0253705	50633.3	18608.9	25375.2	138149	163073	168136	STRING 11.5
O35874	Neutral amino acid transporter A	Slc1a4	11	3	6.387	0.00559187	22795.6	27726.9	15818	160367	145605	145522	STRING 11.5
P70232	Neural cell adhesion molecule L1-like protein	Chl1	145	20	6.327	0.00141189	774848	719493	459845	4.55203e+06	4.66336e+06	3.40305e+06	STRING 11.5
P97798	Neogenin	Neo1	82	19	6.286	0.00196653	547931	382196	326825	2.60299e+06	2.40243e+06	1.97538e+06	STRING 11.5
P97797	Tyrosine-protein phosphatase non-receptor type substrate 1	Sirpa	46	7	6.104	0.000239977	270308	310892	235181	1.6812e+06	1.65001e+06	1.23301e+06	STRING 11.5
Q99P47	Contactin-associated protein-like 4	Cntnap4	11	5	6.087	0.0151916	30540.6	38474.5	14935.4	185898	189885	143663	STRING 11.5
P97927	Laminin subunit alpha-4	Lama4	27	8	6.076	0.00122895	145117	160806	198886	1.25408e+06	977126	752293	STRING 11.5
Q61292	Laminin subunit beta-2	Lamb2	168	33	6.069	2.80693e-05	865381	696468	788999	4.67154e+06	5.62737e+06	4.78812e+06	STRING 11.5
P55066	Neurocan core protein	Ncan	50	13	6.03	5.4545e-05	436737	366369	361237	2.43168e+06	2.20927e+06	2.12076e+06	STRING 11.5
Q80YX1	Tenascin	Tnc	366	46	5.966	8.29861e-05	3.61279e+06	3.07494e+06	2.92702e+06	1.83449e+07	1.91296e+07	1.67365e+07	STRING 11.5
Q8BGN3	Glycerophosphocholine cholinephosphodiesterase ENPP6	Enpp6	18	4	5.942	0.0491255	124323	64511.4	75039.4	718567	445861	175167	STRING 11.5
P02463	Collagen alpha-1(IV) chain	Col4a1	25	5	5.904	0.00216317	160433	143029	117398	854944	818030	844376	STRING 11.5
P35438	Glutamate receptor ionotropic, NMDA 1	Grin1	7	4	5.713	0.000292635	63234.2	65118.7	76797.1	367135	397185	371994	STRING 11.5
P23818	Glutamate receptor 1	Gria1	60	12	5.662	0.00488545	393519	256963	316339	1.76334e+06	1.79115e+06	1.81184e+06	STRING 11.5
B9EKR1	Receptor-type tyrosine-protein phosphatase zeta	Ptprz1	109	13	5.658	0.0139692	1.50264e+06	1.46059e+06	640137	9.57712e+06	8.26424e+06	7.38745e+06	STRING 11.5
Q810U3	Neurofascin	Nfasc	169	26	5.626	0.000437029	1.90022e+06	1.55556e+06	1.28926e+06	9.14643e+06	8.75209e+06	6.97279e+06	STRING 11.5
Q62059	Versican core protein	Vcan	48	12	5.581	0.000140087	357033	278483	302057	1.81239e+06	1.68584e+06	1.54629e+06	Saroja et al. J Neurochem. 2014;130(6):797-804.
Q8R464	Cell adhesion molecule 4	Cadm4	134	12	5.567	0.00320833	1.56078e+06	1.09423e+06	868559	6.09153e+06	6.41395e+06	4.72519e+06	STRING 11.5
Q5F226	Protocadherin Fat 2	Fat2	420	76	5.51	0.00125617	4.10456e+06	3.22933e+06	2.79357e+06	2.05375e+07	1.77927e+07	1.76921e+07	STRING 11.5
Q80TS3	Adhesion G protein-coupled receptor L3	Adgrl3	15	8	5.496	5.79752e-06	64226.5	62090.9	60663.5	341253	349164	318974	STRING 11.5
P15116	Cadherin-2	Cdh2	39	8	5.364	0.0289988	282703	705659	299564	1.7998e+06	1.60698e+06	1.11274e+06	STRING 11.5
P56528	ADP-ribosyl cyclase/cyclic ADP-ribose hydrolase 1	Cd38	5	2	5.36	0.0435447	27320.5	10846.2	23727.7	180102	127190	41897.8	STRING 11.5
Q6NXK7	Inactive dipeptidyl peptidase 10	Dpp10	36	8	5.317	0.00118428	259115	221729	164875	1.2926e+06	1.17894e+06	808096	STRING 11.5
Q7TNR6	Immunoglobulin superfamily member 21	Igsf21	23	6	5.314	0.0130724	210524	96815.7	99210.9	760334	527175	510238	STRING 11.5
O88507	Ciliary neurotrophic factor receptor subunit alpha	Cntfr	89	9	5.294	0.00133382	1.00929e+06	824500	605179	4.77719e+06	4.3646e+06	3.35998e+06	STRING 11.5
Q9JIA1	Leucine-rich glioma-inactivated protein 1	Lgi1	17	6	5.259	0.000461529	93046.5	128675	130388	676752	686861	545646	STRING 11.5
Q3V3R4	Integrin alpha-1	Itga1	11	4	5.012	0.000753426	58167	47872.7	70397	336145	291529	220344	STRING 11.5
P10493	Nidogen-1	Nid1	239	32	4.992	0.0020097	3.21625e+06	2.48726e+06	2.06891e+06	1.23371e+07	1.2417e+07	1.46505e+07	STRING 11.5
O54991	Contactin-associated protein 1	Cntnap1	64	16	4.979	0.000476713	442551	425438	328119	2.27777e+06	2.11824e+06	1.90811e+06	STRING 11.5
P08122	Collagen alpha-2(IV) chain	Col4a2	17	4	4.958	0.018735	296823	212916	116645	1.05564e+06	1.09419e+06	813154	STRING 11.5
Q9R1V6	Disintegrin and metalloproteinase domain-containing protein 22	Adam22	15	5	4.936	0.00142085	75100.8	103653	98218.1	500503	484799	443082	STRING 11.5
Q8CJH3	Plexin-B1	Plxnb1	42	10	4.894	0.0102926	304081	214371	174743	1.04916e+06	1.08936e+06	1.04167e+06	STRING 11.5
Q9CS84	Neurexin-1	Nrxn1	32	10	4.887	0.00131551	229015	196391	186555	1.21096e+06	959680	803761	STRING 11.5
P16390	Potassium voltage-gated channel subfamily A member 3	Kcna3	8	2	4.842	0.000202526	20985.3	27635.4	23979.1	116118	125577	104624	STRING 11.5
Q9QYS2	Metabotropic glutamate receptor 3	Grm3	43	9	4.831	0.00278259	389649	265499	226777	1.28273e+06	1.61281e+06	1.17837e+06	STRING 11.5
Q8BLK3	Limbic system-associated membrane protein	Lsamp	50	7	4.778	0.00227333	822082	542672	532907	2.59279e+06	2.72321e+06	1.99919e+06	STRING 11.5
P10852	4F2 cell-surface antigen heavy chain	Slc3a2	113	14	4.647	0.000116391	1.50114e+06	1.40246e+06	1.2215e+06	6.51685e+06	6.59533e+06	5.27337e+06	STRING 11.5
Q8JZS0	Protein lin-7 homolog A	Lin7a	6	3	4.629	0.0207753	49470	20058	40322.1	176974	213028	186668	STRING 11.5
O35136	Neural cell adhesion molecule 2	Ncam2	75	16	4.494	0.0176342	905639	878901	363632	3.94958e+06	4.02984e+06	2.64201e+06	STRING 11.5
P39061	Collagen alpha-1(XVIII) chain	Col18a1	15	4	4.481	0.00173277	69670.7	63986.1	62887.4	286744	250890	346089	STRING 11.5
Q9D1T0	Leucine-rich repeat and immunoglobulin-like domain-containing nogo receptor-interacting protein 1	Lingo1	18	3	4.371	0.0049492	58446.3	79078.9	70099.6	306430	405600	222173	STRING 11.5
Q8BKG3	Inactive tyrosine-protein kinase 7	Ptk7	35	7	4.266	0.001156	65023.6	100146	94150.1	401677	471801	337713	STRING 11.5
Q9R1V7	Disintegrin and metalloproteinase domain-containing protein 23	Adam23	29	6	4.193	0.00446859	116178	73440.8	88222.8	606515	369885	319282	STRING 11.5
P12960	Contactin-1	Cntn1	606	40	4.154	0.00167685	1.17005e+07	9.76414e+06	7.58982e+06	4.05617e+07	4.17861e+07	3.27715e+07	STRING 11.5
Q9R171	Cerebellin-1	Cbln1	58	6	4.141	0.0029435	415580	236533	336784	1.63062e+06	1.39469e+06	1.07331e+06	STRING 11.5
Q61490	CD166 antigen	Alcam	17	5	4.055	0.0191251	23804.5	22002.4	35694.7	138115	96527.4	58772.9	STRING 11.5
Q60675	Laminin subunit alpha-2	Lama2	46	18	3.937	2.18989e-05	329871	312240	289155	1.24316e+06	1.22922e+06	1.14139e+06	STRING 11.5
P18572	Basigin	Bsg	18	4	3.873	0.0131319	404278	240847	238668	1.07484e+06	888694	932797	STRING 11.5
E9Q7X7	Neurexin-2	Nrxn2	15	6	3.867	0.00276683	94152	106302	69677.5	364114	418358	251903	STRING 11.5
P62334	26S proteasome regulatory subunit 10B	Psmc6	6	3	3.842	0.00283778	18421.6	26242.9	28324	100815	115217	93731.9	STRING 11.5
O88343	Electrogenic sodium bicarbonate cotransporter 1	Slc4a4	148	14	3.823	0.00215072	2.40207e+06	1.79397e+06	1.57408e+06	7.95427e+06	6.85907e+06	5.19107e+06	STRING 11.5
Q8BYM5	Neuroligin-3	Nlgn3	33	6	3.796	0.00283174	221319	149277	219129	831897	907769	743871	STRING 11.5
Q6ZQA6	Immunoglobulin superfamily member 3	Igsf3	72	18	3.788	0.00328626	347933	301229	248168	1.14115e+06	1.21622e+06	1.11862e+06	STRING 11.5
Q61330	Contactin-2	Cntn2	190	23	3.746	0.00833277	2.59086e+06	1.87569e+06	1.53869e+06	6.55372e+06	7.02659e+06	7.77159e+06	STRING 11.5
Q8R366	Immunoglobulin superfamily member 8	Igsf8	43	9	3.465	0.0182249	422592	307995	218786	1.07961e+06	1.06707e+06	918654	STRING 11.5
Q64487	Receptor-type tyrosine-protein phosphatase delta	Ptprd	26	8	3.456	0.00257961	164749	109195	162097	586445	560180	387687	STRING 11.5
P13595	Neural cell adhesion molecule 1	Ncam1	416	28	3.432	0.0184722	1.4966e+07	1.10879e+07	7.06577e+06	3.8056e+07	3.99489e+07	2.96206e+07	STRING 11.5
B2RXS4	Plexin-B2	Plxnb2	68	11	3.428	0.0101359	448136	468023	271267	1.53638e+06	1.62817e+06	1.33857e+06	STRING 11.5
P19137	Laminin subunit alpha-1	Lama1	20	9	3.423	0.0129371	122836	231790	173624	594312	643330	506442	STRING 11.5
O70318	Band 4.1-like protein 2	Epb41l2	8	2	3.421	0.0221432	63769.3	32509	43844.4	146491	149999	162473	STRING 11.5
P01831	Thy-1 membrane glycoprotein	Thy1	25	4	3.416	0.00145309	669546	565842	587437	2.28644e+06	2.0068e+06	1.65198e+06	STRING 11.5
Q8JZQ9	Eukaryotic translation initiation factor 3 subunit B	Eif3b	8	4	3.337	0.00354737	15168.8	17425.8	24763.4	58144.1	53404.6	82358.1	STRING 11.5
P54763	Ephrin type-B receptor 2	Ephb2	3	2	3.324	0.0267029	20312.6	40616	28010.4	92731.7	93107.1	96034.2	STRING 11.5
P70663	SPARC-like protein 1	Sparcl1	31	8	3.281	0.0114008	442934	227136	344648	1.29309e+06	1.13079e+06	748917	STRING 11.5
Q9D023	Mitochondrial pyruvate carrier 2	Mpc2	25	3	3.248	0.0497068	148757	324177	171384	530542	586109	556687	STRING 11.5
Q8BY89	Choline transporter-like protein 2	Slc44a2	8	4	3.175	0.00588184	64781.8	43328.2	40749.6	165874	137586	111602	STRING 11.5
Q61001	Laminin subunit alpha-5	Lama5	21	4	3.155	0.0118812	34077.9	30886.8	18290.3	88727.9	115274	97440.3	STRING 11.5
Q99PJ0	Neurotrimin	Ntm	112	11	3.137	0.0013549	2.45967e+06	2.06379e+06	1.87499e+06	6.47492e+06	6.8423e+06	6.00645e+06	STRING 11.5
Q80T41	Gamma-aminobutyric acid type B receptor subunit 2	Gabbr2	13	5	3.065	0.00115911	35271.2	28916.2	26725.7	99768.8	88633.1	86358.4	STRING 11.5
Q01149	Collagen alpha-2(I) chain	Col1a2	14	2	3.048	0.0286613	107076	85295	44482.1	286217	176833	259982	STRING 11.5
Q9EP69	Phosphatidylinositol-3-phosphatase SAC1	Sacm1l	3	2	2.975	0.0232666	25146	26058.5	38553.1	77530.9	57358.3	121683	STRING 11.5
Q6GQU6	Leucine-rich repeat and immunoglobulin-like domain-containing nogo receptor-interacting protein 3	Lingo3	19	6	2.954	0.0460402	53347.7	69438.4	113819	205477	197056	205102	STRING 11.5
P43275	Histone H1.1	H1-1	45	2	2.941	0.0397856	302867	278077	537094	581225	890722	1.12496e+06	STRING 11.5
P97300	Neuroplastin	Nptn	27	5	2.905	0.000676732	450394	384625	357840	1.11752e+06	1.16341e+06	911095	STRING 11.5
Q91ZX7	Prolow-density lipoprotein receptor-related protein 1	Lrp1	207	40	2.889	0.0209953	2.1841e+06	1.77217e+06	1.23318e+06	5.2942e+06	5.10221e+06	5.11956e+06	STRING 11.5
Q99J99	3-mercaptopyruvate sulfurtransferase	Mpst	4	2	2.88	0.0215198	15503.6	16793.2	25557.1	51121.7	45129.7	48364.8	STRING 11.5
Q9D0I9	Arginine--tRNA ligase, cytoplasmic	Rars1	3	3	2.877	0.0045468	34384.9	46189.9	30005.9	81735	98938.2	112097	STRING 11.5
Q9Z127	Large neutral amino acids transporter small subunit 1	Slc7a5	13	2	2.861	0.00154174	97286	111515	77755.1	242028	278314	329897	STRING 11.5
Q3UH99	Protein shisa-6	Shisa6	11	3	2.852	0.0328089	36505.8	44818.8	59566.9	184427	127821	80856.3	STRING 11.5
P28571	Sodium- and chloride-dependent glycine transporter 1	Slc6a9	34	5	2.801	0.044151	484745	414318	200767	1.202e+06	1.1607e+06	1.00823e+06	STRING 11.5
Q99N28	Cell adhesion molecule 3	Cadm3	126	11	2.723	0.00304577	2.17029e+06	1.52988e+06	1.89161e+06	5.42239e+06	5.15174e+06	4.52534e+06	STRING 11.5
P14231	Sodium/potassium-transporting ATPase subunit beta-2	Atp1b2	128	9	2.71	0.012211	4.39022e+06	3.06971e+06	2.90898e+06	8.32036e+06	9.32565e+06	8.10811e+06	STRING 11.5
Q5DTL9	Sodium-driven chloride bicarbonate exchanger	Slc4a10	50	8	2.689	0.00309305	259229	231012	178514	647446	621303	470955	STRING 11.5
Q8VHY0	Chondroitin sulfate proteoglycan 4	Cspg4	148	32	2.524	0.0325641	1.74767e+06	791547	1.60942e+06	4.0628e+06	4.91165e+06	3.63129e+06	STRING 11.5
Q9WTS4	Teneurin-1	Tenm1	4	3	2.469	0.026457	43015.8	22912.9	37768	93259	102845	86506.1	STRING 11.5

## Sheet: S5-3. 5 weeks, hits
UniProt ID	Protein	Gene	# PSMs	# unique peptides	Median fold change: PhoxID with compound 1 vs. 2	Fold change p-value	Abundances (Grouped): Compound 2, Bio. Rep. 1	Abundances (Grouped): Compound 2, Bio. Rep. 2	Abundances (Grouped): Compound 2, Bio. Rep. 3	Abundances (Grouped): Compound 1, Bio. Rep. 1	Abundances (Grouped): Compound 1, Bio. Rep. 2	Abundances (Grouped): Compound 1, Bio. Rep. 3	Interaction reference
Q9CPW0	Contactin-associated protein-like 2	Cntnap2	271	34	42.67	0.00651932	795226	1.25823e+06	3.05051e+06	1.41216e+07	5.36883e+07	5.73099e+07	STRING 11.5
P23819	Glutamate receptor 2	Gria2	216	27	30.558	0.00364183	2.00429e+06	1.06094e+06	1.48677e+06	1.70673e+07	4.54328e+07	4.94949e+07	STRING 11.5
Q9Z2W8	Glutamate receptor 4	Gria4	392	22	27.843	0.0039407	5.02622e+06	1.94063e+06	1.95839e+06	2.1763e+07	5.45281e+07	6.38227e+07	STRING 11.5
Q8R464	Cell adhesion molecule 4	Cadm4	146	14	27.713	0.00692535	323612	654981	637413	5.0964e+06	1.76648e+07	1.90737e+07	STRING 11.5
Q69ZK9	Neuroligin-2	Nlgn2	68	10	27.129	0.0456831	326645	298522	294156	1.3751e+06	8.0986e+06	8.60616e+06	STRING 11.5
Q99JY0	Trifunctional enzyme subunit beta, mitochondrial	Hadhb	22	3	25.217	0.047093	44944	12507.8	17340.7	62478	437285	462358	STRING 11.5
P63056	Noelin-3	Olfm3	71	11	24.464	0.00679435	296858	411537	490765	3.6705e+06	1.0068e+07	1.11007e+07	STRING 11.5
P56528	ADP-ribosyl cyclase/cyclic ADP-ribose hydrolase 1	Cd38	27	5	23.51	0.0349701	107393	120993	119916	620838	3.25515e+06	2.8192e+06	STRING 11.5
Q05793	Basement membrane-specific heparan sulfate proteoglycan core protein	Hspg2	318	55	21.861	0.042665	1.41653e+06	1.52097e+06	2.13698e+06	6.6374e+06	3.32501e+07	4.12751e+07	STRING 11.5
B9EKR1	Receptor-type tyrosine-protein phosphatase zeta	Ptprz1	134	16	21.484	0.000660711	1.1977e+06	838421	1.05792e+06	1.32202e+07	2.27287e+07	2.35491e+07	STRING 11.5
Q9Z218	Dipeptidyl aminopeptidase-like protein 6	Dpp6	107	14	21.47	0.00888724	481123	667786	1.09588e+06	4.33433e+06	1.44716e+07	1.43377e+07	STRING 11.5
Q6NXK7	Inactive dipeptidyl peptidase 10	Dpp10	47	8	21.373	0.0462841	243674	280291	281509	1.08089e+06	5.99054e+06	6.01696e+06	STRING 11.5
Q61292	Laminin subunit beta-2	Lamb2	317	48	20.293	0.0311619	1.64589e+06	1.67992e+06	2.49773e+06	9.2588e+06	3.40912e+07	5.20135e+07	STRING 11.5
Q8BYI9	Tenascin-R	Tnr	518	35	20.199	0.00654286	2.10854e+06	3.93433e+06	6.58483e+06	2.66058e+07	7.94693e+07	9.29476e+07	STRING 11.5
Q62443	Neuronal pentraxin-1	Nptx1	84	15	19.128	0.00644154	572171	366754	400584	3.06796e+06	7.86978e+06	7.66244e+06	STRING 11.5
Q8K406	Leucine-rich repeat LGI family member 3	Lgi3	94	16	18.87	0.0112194	555447	635354	833216	4.38607e+06	1.19889e+07	1.30958e+07	STRING 11.5
Q810U3	Neurofascin	Nfasc	371	32	18.772	0.00560414	1.40122e+06	3.16936e+06	4.2988e+06	1.97285e+07	5.94962e+07	6.14505e+07	STRING 11.5
P10493	Nidogen-1	Nid1	236	34	18.455	0.0240018	2.30707e+06	1.79696e+06	2.10805e+06	1.11344e+07	3.89048e+07	4.02763e+07	STRING 11.5
Q80YX1	Tenascin	Tnc	164	28	18.356	0.0241062	942489	1.14136e+06	1.33857e+06	5.95447e+06	2.09512e+07	2.37476e+07	STRING 11.5
P70232	Neural cell adhesion molecule L1-like protein	Chl1	128	24	17.273	0.0477692	475131	509009	605423	2.46617e+06	2.0747e+07	8.7923e+06	STRING 11.5
Q9CS84	Neurexin-1	Nrxn1	38	7	17.162	0.0194369	180139	274578	222775	1.16615e+06	3.82319e+06	4.14243e+06	STRING 11.5
P23818	Glutamate receptor 1	Gria1	143	16	17.017	0.0177569	508506	773786	838434	4.58596e+06	2.14592e+07	1.31672e+07	STRING 11.5
P35438	Glutamate receptor ionotropic, NMDA 1	Grin1	57	11	17.015	0.0333559	325286	292236	332380	1.42546e+06	5.53474e+06	5.81284e+06	STRING 11.5
Q6PHS9	Voltage-dependent calcium channel subunit alpha-2/delta-2	Cacna2d2	93	17	16.698	0.010357	1.83005e+06	537441	728665	4.48862e+06	1.2167e+07	1.21992e+07	STRING 11.5
Q71M36	Chondroitin sulfate proteoglycan 5	Cspg5	11	3	16.416	0.0177676	74850.8	74458	96555.5	447579	1.22877e+06	1.44755e+06	STRING 11.5
Q99N28	Cell adhesion molecule 3	Cadm3	75	10	16.189	0.0132375	277834	508970	567236	2.48244e+06	8.23974e+06	1.00791e+07	STRING 11.5
A2ASQ1	Agrin	Agrn	175	34	16.08	0.0324134	939090	793307	1.31975e+06	3.80032e+06	1.51009e+07	1.74521e+07	STRING 11.5
Q8BNA6	Protocadherin Fat 3	Fat3	3	2	15.918	0.00249483	16021.7	31309.3	14118.9	166044	259381	255031	STRING 11.5
P08122	Collagen alpha-2(IV) chain	Col4a2	24	4	15.698	0.00820802	140831	217405	339750	1.25042e+06	3.41289e+06	4.36188e+06	STRING 11.5
P12960	Contactin-1	Cntn1	654	38	15.417	0.0067871	5.63871e+06	6.4392e+06	9.12044e+06	4.11757e+07	9.92738e+07	1.05577e+08	STRING 11.5
Q9DB72	BTB/POZ domain-containing protein 17	Btbd17	55	12	14.93	0.00372624	307478	498188	608337	3.05749e+06	7.69121e+06	7.43809e+06	STRING 11.5
P10852	4F2 cell-surface antigen heavy chain	Slc3a2	95	10	14.76	0.018331	585206	1.04449e+06	1.18472e+06	4.12883e+06	1.54164e+07	1.64549e+07	STRING 11.5
Q9JIA1	Leucine-rich glioma-inactivated protein 1	Lgi1	61	13	14.535	0.0333872	466143	511572	732428	2.08953e+06	7.43573e+06	9.79449e+06	STRING 11.5
Q9Z2W9	Glutamate receptor 3	Gria3	328	25	14.44	0.0104027	1.02409e+06	3.81516e+06	4.34461e+06	2.67218e+07	5.50925e+07	6.435e+07	STRING 11.5
O88322	Nidogen-2	Nid2	107	22	13.121	0.0301014	601505	448947	1.16927e+06	2.42847e+06	7.8921e+06	1.41857e+07	STRING 11.5
P13595	Neural cell adhesion molecule 1	Ncam1	403	28	12.855	0.0114052	2.05557e+06	5.01071e+06	8.40328e+06	2.9177e+07	6.44135e+07	6.65205e+07	STRING 11.5
P09055	Integrin beta-1	Itgb1	48	12	12.775	0.0274994	458880	366489	319267	1.45417e+06	4.68197e+06	5.19556e+06	STRING 11.5
Q810U4	Neuronal cell adhesion molecule	Nrcam	163	21	12.581	0.0303151	747275	2.23589e+06	5.04703e+06	1.12681e+07	2.81305e+07	3.22373e+07	STRING 11.5
Q61625	Glutamate receptor ionotropic, delta-2	Grid2	336	27	12.5	0.00545645	3.08923e+06	4.46152e+06	6.96032e+06	2.32276e+07	5.57674e+07	6.08882e+07	STRING 11.5
Q8CJH3	Plexin-B1	Plxnb1	76	17	12.425	0.0412749	377121	405689	425892	1.34875e+06	5.04056e+06	5.18692e+06	STRING 11.5
Q9R1V4	Disintegrin and metalloproteinase domain-containing protein 11	Adam11	57	9	12.318	0.0441121	202821	187968	176570	615936	2.31538e+06	2.60761e+06	STRING 11.5
O35136	Neural cell adhesion molecule 2	Ncam2	115	19	12.077	0.025745	785692	654573	902903	3.27709e+06	9.48892e+06	1.20838e+07	STRING 11.5
Q80WM4	Hyaluronan and proteoglycan link protein 4	Hapln4	54	12	11.903	0.0407756	302757	353739	559493	1.11496e+06	4.2106e+06	5.38713e+06	STRING 11.5
Q9WV18	Gamma-aminobutyric acid type B receptor subunit 1	Gabbr1	25	6	11.306	0.0268163	147178	143632	322781	508044	1.66393e+06	1.75634e+06	STRING 11.5
P35436	Glutamate receptor ionotropic, NMDA 2A	Grin2a	12	5	10.828	0.0495042	77096.2	96324.3	25063.8	144388	871384	834810	STRING 11.5
Q8K4Z0	Leucine-rich repeat LGI family member 2	Lgi2	7	4	10.779	0.00938618	69042.8	93144.3	45988.2	281622	744228	774189	STRING 11.5
Q8BLK3	Limbic system-associated membrane protein	Lsamp	48	6	10.757	0.00199471	347469	316066	374708	2.5894e+06	3.73774e+06	4.27155e+06	STRING 11.5
P01831	Thy-1 membrane glycoprotein	Thy1	27	3	10.156	0.013013	70843.2	252348	281942	1.13162e+06	2.5628e+06	3.04436e+06	STRING 11.5
Q9JHG0	Cerebellin-3	Cbln3	49	4	10.122	0.0310961	75470.5	399299	509688	2.43399e+06	4.04157e+06	5.65791e+06	STRING 11.5
Q8K1S1	Leucine-rich repeat LGI family member 4	Lgi4	23	7	10.014	0.0281901	227349	155267	241028	681295	2.27674e+06	2.34431e+06	STRING 11.5
Q80TS3	Adhesion G protein-coupled receptor L3	Adgrl3	30	12	9.654	0.0259637	221094	268105	264679	956793	2.55524e+06	2.97782e+06	STRING 11.5
Q8R366	Immunoglobulin superfamily member 8	Igsf8	134	11	9.615	0.01872	764840	1.50361e+06	2.79475e+06	5.32434e+06	1.44569e+07	1.77612e+07	STRING 11.5
E9Q7X7	Neurexin-2	Nrxn2	49	10	9.413	0.0408936	518449	380070	366521	1.08678e+06	3.77403e+06	3.57756e+06	STRING 11.5
Q02788	Collagen alpha-2(VI) chain	Col6a2	8	2	9.412	0.0334083	15648.4	31673.9	12778.4	47779.9	147282	204014	STRING 11.5
P02463	Collagen alpha-1(IV) chain	Col4a1	22	3	9.339	0.0468258	334970	173076	154198	492930	1.61639e+06	2.52802e+06	STRING 11.5
Q9R087	Glypican-6	Gpc6	4	3	9.192	0.0469032	59013.7	32997.9	34576.2	87865.8	325100	317836	Allen et al. Nature. 2012;486(7403):410-4.
P97797	Tyrosine-protein phosphatase non-receptor type substrate 1	Sirpa	34	7	9.053	0.0250187	643116	306187	372084	1.11286e+06	3.53047e+06	3.36839e+06	STRING 11.5
P61215	Carbonic anhydrase-related protein 10	Ca10	8	2	8.802	0.00372965	64145.3	72817.8	62242.5	456340	822406	564584	STRING 11.5
P16388	Potassium voltage-gated channel subfamily A member 1	Kcna1	30	3	8.737	0.0175693	98935.5	259354	351691	787673	2.26596e+06	2.33473e+06	STRING 11.5
P97798	Neogenin	Neo1	29	10	8.305	0.026	127387	113959	163314	409988	1.05791e+06	1.23086e+06	STRING 11.5
P39087	Glutamate receptor ionotropic, kainate 2	Grik2	5	2	8.116	0.0114649	14712.7	29826.3	29468.1	239170	523247	133166	STRING 11.5
Q9QUP5	Hyaluronan and proteoglycan link protein 1	Hapln1	53	9	7.858	0.0108175	643439	451866	679314	2.27186e+06	5.0559e+06	5.61701e+06	STRING 11.5
P55066	Neurocan core protein	Ncan	24	7	7.745	0.0203979	167586	199149	215511	667886	1.54233e+06	1.7204e+06	STRING 11.5
Q9R171	Cerebellin-1	Cbln1	82	5	7.685	0.00631366	478951	992545	1.23242e+06	5.17856e+06	7.62781e+06	8.91682e+06	STRING 11.5
P97772	Metabotropic glutamate receptor 1	Grm1	166	20	7.643	0.0397433	1.98037e+06	2.27679e+06	2.90109e+06	5.72772e+06	1.74015e+07	1.80732e+07	STRING 11.5
Q8BLQ9	Cell adhesion molecule 2	Cadm2	32	6	7.627	0.00531748	120462	88812.4	203558	567031	918768	935557	STRING 11.5
Q63912	Oligodendrocyte-myelin glycoprotein	Omg	14	6	7.598	0.0430089	100296	87797.6	107943	260579	762003	893871	STRING 11.5
E9PZ19	Protein turtle homolog B	Igsf9b	15	6	7.474	0.0234504	57041.2	47145.9	67581.3	170074	460296	426350	STRING 11.5
Q9R1V6	Disintegrin and metalloproteinase domain-containing protein 22	Adam22	70	13	7.441	0.0352696	340977	996315	751028	1.54003e+06	5.72088e+06	5.58809e+06	STRING 11.5
Q8R0I0	Angiotensin-converting enzyme 2	Ace2	5	2	7.406	0.00650737	19983.6	28683.2	46688.8	109102	212416	215605	STRING 11.5
P18572	Basigin	Bsg	12	4	6.788	0.0297033	172912	178389	163270	492050	1.1737e+06	1.2e+06	STRING 11.5
Q80V42	Carboxypeptidase M	Cpm	10	3	6.733	0.0155748	58284.6	55458.2	140227	291372	392402	536859	STRING 11.5
Q69ZU6	Thrombospondin type-1 domain-containing protein 7A	Thsd7a	29	8	6.553	0.0382038	315670	311710	299820	807827	2.0425e+06	2.23308e+06	STRING 11.5
P28571	Sodium- and chloride-dependent glycine transporter 1	Slc6a9	49	6	6.46	0.0220637	378729	1.06514e+06	1.26995e+06	4.63938e+06	7.20586e+06	6.88034e+06	STRING 11.5
O88343	Electrogenic sodium bicarbonate cotransporter 1	Slc4a4	270	20	6.346	0.0304862	1.94677e+06	6.00862e+06	8.1579e+06	1.70189e+07	3.81752e+07	3.81333e+07	STRING 11.5
P62812	Gamma-aminobutyric acid receptor subunit alpha-1	Gabra1	28	5	6.184	0.0135533	396587	448697	575379	1.33735e+06	2.86005e+06	2.77488e+06	STRING 11.5
Q8C419	Probable G-protein coupled receptor 158	Gpr158	31	11	5.346	0.0493459	112731	241790	267114	379891	1.46637e+06	1.29256e+06	STRING 11.5
Q5M8N0	CB1 cannabinoid receptor-interacting protein 1	Cnrip1	17	2	4.99	0.0132003	83785.4	97778.2	191531	337011	487873	706689	STRING 11.5
Q8HW98	IgLON family member 5	Iglon5	8	2	4.92	0.0138711	41759.3	74979.3	87244.5	172029	368933	411531	STRING 11.5
P97370	Sodium/potassium-transporting ATPase subunit beta-3	Atp1b3	77	6	4.201	0.0459372	1.40467e+06	637919	899677	1.5476e+06	3.79677e+06	3.77952e+06	STRING 11.5
O54734	Dolichyl-diphosphooligosaccharide--protein glycosyltransferase 48 kDa subunit	Ddost	8	3	4.195	0.0186995	82238.4	148379	203356	475076	694408	622484	STRING 11.5
O55100	Synaptogyrin-1	Syngr1	22	2	4.148	0.0200104	127518	179768	214862	533259	1.52591e+06	745613	STRING 11.5
Q3UHJ0	AP2-associated protein kinase 1	Aak1	6	4	3.963	0.0438015	58976.2	66087.3	48997.4	105053	253805	233733	STRING 11.5
P07724	Albumin	Alb	288	23	3.68	0.0463892	3.38309e+06	7.57859e+06	8.98431e+06	1.14991e+07	2.78862e+07	3.40046e+07	STRING 11.5
P55088	Aquaporin-4	Aqp4	29	4	3.19	0.0402306	1.24733e+06	1.63813e+06	2.12551e+06	3.5059e+06	5.22494e+06	1.0448e+07	STRING 11.5
Q6ZWU9	40S ribosomal protein S27	Rps27	8	2	3.05	0.0467291	199632	350436	454643	517559	1.06871e+06	1.07383e+06	STRING 11.5
O35633	Vesicular inhibitory amino acid transporter	Slc32a1	32	6	2.981	0.0373894	187330	305255	446216	667600	951512	909870	STRING 11.5
P20917	Myelin-associated glycoprotein	Mag	68	10	2.955	0.0306347	2.65989e+06	1.93396e+06	3.65325e+06	4.60238e+06	7.86091e+06	1.00244e+07	STRING 11.5
Q9D8B7	Junctional adhesion molecule C	Jam3	12	2	2.936	0.0217984	160332	110731	205548	337304	470668	792167	STRING 11.5
Q8BGH2	Sorting and assembly machinery component 50 homolog	Samm50	42	7	2.911	0.0403132	92568.9	193897	235884	405099	564497	592067	STRING 11.5
O88741	Ganglioside-induced differentiation-associated protein 1	Gdap1	12	3	2.71	0.0429453	60843.3	43585.9	92480.2	163715	164874	178370	STRING 11.5
P48962	ADP/ATP translocase 1	Slc25a4	627	10	2.609	0.047935	5.34739e+07	6.38838e+07	8.59364e+07	9.2222e+07	1.66702e+08	1.73532e+08	STRING 11.5
Q80TZ3	Putative tyrosine-protein phosphatase auxilin	Dnajc6	7	4	2.117	0.0419097	63138.2	89288.9	107030	118725	199008	189004	STRING 11.5
P50580	Proliferation-associated protein 2G4	Pa2g4	8	3	2.077	0.0203308	40995.3	43262.3	63939.2	89837.9	113984	88929	STRING 11.5
P80316	T-complex protein 1 subunit epsilon	Cct5	5	3	1.946	0.0423515	83846.4	85406.6	126659	140317	180501	166182	STRING 11.5
P28738	Kinesin heavy chain isoform 5C	Kif5c	21	6	1.761	0.0154055	200843	214183	279625	351509	461389	377171	STRING 11.5
P70168	Importin subunit beta-1	Kpnb1	14	2	1.42	0.0151129	234131	213186	272728	332446	395044	330905	STRING 11.5

## Sheet: S5-4. Higher in P8 or P13
UniProt ID	Protein	Gene	P8: Median fold change	P8: p-value	P8: # unique peptides	P13: Median fold change	P13: p-value	P13: # unique peptides	5 weeks: Median fold change	5 weeks: p-value	5 weeks: # unique peptides
Q04857	Collagen alpha-1(VI) chain	Col6a1	2.89	0.0416608	2	not detected	not detected	not detected	not detected	not detected	not detected
O88998	Noelin	Olfm1	not detected	not detected	not detected	14.05	7.05804e-05	5	2.264	0.295411	7
Q9JLB9	Nectin-3	Nectin3	not detected	not detected	not detected	9.293	0.000493008	3	not detected	not detected	not detected
P0C192	Leucine-rich repeat-containing protein 4B	Lrrc4b	8.426	0.012121	4	8.108	0.00135466	4	1.368	0.360736	5
Q9QZF2	Glypican-1	Gpc1	1.621	0.476151	5	7.548	0.0202084	6	2.417	0.483744	4
O35874	Neutral amino acid transporter A	Slc1a4	1.188	0.362286	2	6.387	0.00559187	3	not detected	not detected	not detected
Q7TNR6	Immunoglobulin superfamily member 21	Igsf21	1.328	0.997539	3	5.314	0.0130724	6	2.087	0.0730816	4
P16390	Potassium voltage-gated channel subfamily A member 3	Kcna3	not detected	not detected	not detected	4.842	0.000202526	2	not detected	not detected	not detected
Q8JZS0	Protein lin-7 homolog A	Lin7a	not detected	not detected	not detected	4.629	0.0207753	3	not detected	not detected	not detected
Q61490	CD166 antigen	Alcam	1.569	0.200753	4	4.055	0.0191251	5	not detected	not detected	not detected
Q6ZQA6	Immunoglobulin superfamily member 3	Igsf3	1.862	0.140977	15	3.788	0.00328626	18	not detected	not detected	not detected
O70318	Band 4.1-like protein 2	Epb41l2	not detected	not detected	not detected	3.421	0.0221432	2	not detected	not detected	not detected
Q8JZQ9	Eukaryotic translation initiation factor 3 subunit B	Eif3b	not detected	not detected	not detected	3.337	0.00354737	4	not detected	not detected	not detected
Q01149	Collagen alpha-2(I) chain	Col1a2	not detected	not detected	not detected	3.048	0.0286613	2	not detected	not detected	not detected

## Sheet: S5-5. P8, all
UniProt ID	Protein	Gene	# PSMs	# unique peptides	Median fold change: PhoxID with compound 1 vs. 2	Fold change p-value	Abundances (Grouped): Compound 2, Bio. Rep. 1	Abundances (Grouped): Compound 2, Bio. Rep. 2	Abundances (Grouped): Compound 2, Bio. Rep. 3	Abundances (Grouped): Compound 1, Bio. Rep. 1	Abundances (Grouped): Compound 1, Bio. Rep. 2	Abundances (Grouped): Compound 1, Bio. Rep. 3
P0C192	Leucine-rich repeat-containing protein 4B	Lrrc4b	14	4	8.426	0.012121	139251	158810	79580.5	1.26534e+06	1.17327e+06	442169
Q9Z2W8	Glutamate receptor 4	Gria4	17	2	6.879	0.00751247	53512.2	90712.8	65844.1	643824	452943	261286
P23819	Glutamate receptor 2	Gria2	4	2	4.871	0.0141816	33731.8	34170.8	39553.6	166444	234412	113650
P02469	Laminin subunit beta-1	Lamb1	5	3	4.641	0.00304674	63989.9	56801.5	86411.7	325376	296997	194314
P01631	Ig kappa chain V-II region 26-10		15	3	4.638	0.068507	314576	317737	136582	405403	1.45902e+06	1.78724e+06
P97927	Laminin subunit alpha-4	Lama4	7	2	4.035	0.0844975	20273.9	41190.6	9368.92	81797.7	83322.1	47297.3
A2ASQ1	Agrin	Agrn	11	5	3.561	0.00665563	172335	165263	96613	600106	588528	370986
Q8BYM5	Neuroligin-3	Nlgn3	7	2	3.411	0.0177626	171463	106187	89379.5	362179	437993	357135
Q60675	Laminin subunit alpha-2	Lama2	3	2	3.257	0.061706	12621.4	31211.5	16594	105083	33218.4	54039.7
Q05793	Basement membrane-specific heparan sulfate proteoglycan core protein	Hspg2	71	25	3.243	0.00771887	1.17584e+06	1.44109e+06	891895	5.34157e+06	3.81382e+06	2.81874e+06
Q9Z2W9	Glutamate receptor 3	Gria3	12	2	3.137	0.00669262	202801	163440	272479	853565	636285	491248
P02463	Collagen alpha-1(IV) chain	Col4a1	13	2	2.99	0.0835245	159739	138086	126275	587464	412861	205043
P01869	Ig gamma-1 chain C region, membrane-bound form	Ighg1	28	3	2.986	0.163296	1.704e+06	1.50601e+06	156087	1.95822e+06	5.6544e+06	4.49636e+06
Q04857	Collagen alpha-1(VI) chain	Col6a1	5	2	2.89	0.0416608	32444.9	52183.6	32823.7	241722	94869.3	93626.9
Q9WUM5	Succinate--CoA ligase	Suclg1	13	3	2.867	0.475129	162029	32398.7	42838.5	49516.1	158386	122810
Q61292	Laminin subunit beta-2	Lamb2	18	8	2.85	0.0209074	208673	220618	164236	965828	594622	454782
P55066	Neurocan core protein	Ncan	45	12	2.837	0.0185979	988880	759419	505456	2.32971e+06	2.15453e+06	1.43131e+06
Q9D1T0	Leucine-rich repeat and immunoglobulin-like domain-containing nogo receptor-interacting protein 1	Lingo1	21	3	2.82	0.297523	109272	100073	47090.2	282224	717678	56421.3
Q9CPW0	Contactin-associated protein-like 2	Cntnap2	29	7	2.519	0.081719	684415	733795	352679	1.97581e+06	1.72438e+06	759126
O88322	Nidogen-2	Nid2	36	10	2.442	0.0469729	698971	873498	329592	2.28264e+06	1.70679e+06	1.30966e+06
Q8BYI9	Tenascin-R	Tnr	30	8	2.417	0.0444852	574781	698522	314824	1.5398e+06	1.26096e+06	1.38937e+06
Q9Z218	Dipeptidyl aminopeptidase-like protein 6	Dpp6	55	11	2.401	0.0994563	2.04687e+06	1.66699e+06	1.89009e+06	6.27485e+06	4.53865e+06	2.42421e+06
Q62059	Versican core protein	Vcan	32	7	2.389	0.0412997	764673	795428	368567	1.82687e+06	2.06976e+06	1.77165e+06
P10493	Nidogen-1	Nid1	89	18	2.363	0.00748019	1.92881e+06	2.21506e+06	2.41118e+06	5.6902e+06	5.23323e+06	3.89808e+06
Q80YX1	Tenascin	Tnc	224	30	2.355	0.0151893	8.39618e+06	6.27976e+06	5.31596e+06	1.47915e+07	1.50704e+07	1.08257e+07
B9EKR1	Receptor-type tyrosine-protein phosphatase zeta	Ptprz1	41	7	2.348	0.0642333	2.38242e+06	1.56078e+06	1.08806e+06	3.66458e+06	4.06116e+06	2.43176e+06
Q9CS84	Neurexin-1	Nrxn1	4	2	2.27	0.163086	83794.6	45413.7	18225.4	130122	103073	84235.2
Q6PHS9	Voltage-dependent calcium channel subunit alpha-2/delta-2	Cacna2d2	13	4	2.257	0.130532	233549	355177	129084	642186	527205	284336
P02468	Laminin subunit gamma-1	Lamc1	15	7	2.185	0.0562993	163000	166695	142314	786019	356128	335970
P09055	Integrin beta-1	Itgb1	27	8	2.175	0.103386	997496	1.08189e+06	957057	2.16923e+06	3.25689e+06	1.32354e+06
Q8R2Y2	Cell surface glycoprotein MUC18	Mcam	4	2	2.162	0.00948194	61300.3	72643.1	51528.5	176419	132508	112425
P50543	Protein S100-A11	S100a11	3	2	2.124	0.858966	36021.4	38555.8	1.76626e+06	213109	81901.4	63454.3
P97370	Sodium/potassium-transporting ATPase subunit beta-3	Atp1b3	14	2	2.121	0.561922	384757	241134	230841	523895	511377	174728
Q9QYS2	Metabotropic glutamate receptor 3	Grm3	78	17	2.09	0.0308328	2.40539e+06	2.45835e+06	1.36175e+06	5.45804e+06	5.02671e+06	3.42865e+06
Q02257	Junction plakoglobin	Jup	143	26	2.048	0.82915	3.30968e+06	3.15753e+06	3.77316e+07	6.77737e+06	6.98019e+06	4.54173e+06
Q61625	Glutamate receptor ionotropic, delta-2	Grid2	8	3	2.011	0.200136	72319.3	101392	65549.2	414012	145440	92664
Q6NXK7	Inactive dipeptidyl peptidase 10	Dpp10	12	2	2.008	0.130887	199841	140745	131405	282676	456216	182154
Q8VHY0	Chondroitin sulfate proteoglycan 4	Cspg4	82	21	1.961	0.0806679	1.44234e+06	1.68074e+06	737129	2.82843e+06	2.89094e+06	2.11515e+06
Q810U3	Neurofascin	Nfasc	58	13	1.957	0.0767716	1.41187e+06	1.34233e+06	940636	3.39212e+06	2.62647e+06	1.55532e+06
Q64487	Receptor-type tyrosine-protein phosphatase delta	Ptprd	3	2	1.956	0.0798695	61833.6	58877.6	26388.7	115155	156511	69420.1
P97315	Cysteine and glycine-rich protein 1	Csrp1	8	2	1.954	0.794351	199517	107345	570191	112698	485147	389935
P0DP27	Calmodulin-2	Calm2	36	3	1.953	0.807503	1.01723e+06	888682	6.36455e+06	567708	2.73196e+06	1.98699e+06
P12960	Contactin-1	Cntn1	390	40	1.887	0.032783	2.30267e+07	2.03886e+07	1.65644e+07	3.84835e+07	4.1258e+07	2.65851e+07
P97350	Plakophilin-1	Pkp1	19	7	1.88	0.696858	179203	204480	7.56799e+06	628252	384434	213931
E9Q7X7	Neurexin-2	Nrxn2	7	2	1.87	0.0361809	157771	152360	115695	317554	284959	191916
Q6ZQA6	Immunoglobulin superfamily member 3	Igsf3	95	15	1.862	0.140977	2.85745e+06	2.49309e+06	1.75513e+06	4.6617e+06	4.64196e+06	2.46891e+06
P08122	Collagen alpha-2(IV) chain	Col4a2	3	2	1.835	0.113525	117939	173469	79983.1	517445	216476	177559
Q8BVI4	Dihydropteridine reductase	Qdpr	3	2	1.798	0.0695191	153962	123258	77139.8	170110	258650	221567
O35136	Neural cell adhesion molecule 2	Ncam2	66	13	1.796	0.154677	2.38713e+06	2.84284e+06	1.00447e+06	4.34317e+06	4.28799e+06	2.8638e+06
P28571	Sodium- and chloride-dependent glycine transporter 1	Slc6a9	13	3	1.759	0.0190702	235305	270868	193842	413922	443487	322127
Q9Z204	Heterogeneous nuclear ribonucleoproteins C1/C2	Hnrnpc	11	3	1.754	0.676931	305070	158191	130109	119208	328187	277513
Q71M36	Chondroitin sulfate proteoglycan 5	Cspg5	7	2	1.751	0.160977	167825	132042	79501.4	231213	259761	135976
P70296	Phosphatidylethanolamine-binding protein 1	Pebp1	7	2	1.738	0.904854	354193	438164	1.73235e+06	257684	1.06587e+06	761550
P70663	SPARC-like protein 1	Sparcl1	8	2	1.738	0.137644	64416	219599	224089	311262	468994	381669
P70206	Plexin-A1	Plxna1	22	6	1.723	0.0637519	617392	578175	292308	996430	1.24927e+06	975119
P97447	Four and a half LIM domains protein 1	Fhl1	25	3	1.718	0.741547	556669	648825	1.58972e+06	581372	1.38248e+06	1.11489e+06
O09114	Prostaglandin-H2 D-isomerase	Ptgds	5	2	1.665	0.0967662	160990	229925	185600	318630	309019	211213
P04370	Myelin basic protein	Mbp	29	4	1.64	0.800607	1.28374e+06	1.07426e+06	3.3026e+06	640135	2.1928e+06	2.10552e+06
Q9CQI6	Coactosin-like protein	Cotl1	20	3	1.63	0.607126	964695	520867	502089	849034	859725	537505
Q9QZF2	Glypican-1	Gpc1	15	5	1.621	0.476151	695892	452214	368123	733007	843858	386032
Q8CJH3	Plexin-B1	Plxnb1	33	7	1.61	0.168685	527403	516392	361972	1.0472e+06	831522	474690
P08228	Superoxide dismutase	Sod1	38	5	1.609	0.78008	2.52269e+06	3.0617e+06	6.54901e+06	2.28933e+06	6.58838e+06	4.92683e+06
Q61490	CD166 antigen	Alcam	15	4	1.569	0.200753	526018	501544	410022	817091	786725	462095
P05202	Aspartate aminotransferase, mitochondrial	Got2	180	17	1.568	0.989981	1.02084e+07	8.49427e+06	3.77089e+07	6.76625e+06	2.94304e+07	1.60082e+07
O88343	Electrogenic sodium bicarbonate cotransporter 1	Slc4a4	35	6	1.549	0.124669	850342	805845	574748	1.37948e+06	1.2482e+06	795448
Q8BY89	Choline transporter-like protein 2	Slc44a2	2	2	1.495	0.281334	54376.7	84248.2	16045	69333	113030	81309.2
P08553	Neurofilament medium polypeptide	Nefm	171	17	1.493	0.784822	6.07126e+06	4.78859e+06	1.39669e+07	3.08926e+06	9.06435e+06	9.44432e+06
Q9WV91	Prostaglandin F2 receptor negative regulator	Ptgfrn	17	4	1.479	0.175792	219815	174469	120923	352735	258083	182231
Q8BKG3	Inactive tyrosine-protein kinase 7	Ptk7	58	13	1.477	0.382633	2.47131e+06	2.58323e+06	1.36553e+06	4.23015e+06	3.64999e+06	1.64368e+06
Q99MR8	Methylcrotonoyl-CoA carboxylase subunit alpha, mitochondrial	Mccc1	510	36	1.467	0.566881	3.56902e+07	3.80134e+07	6.5839e+07	4.17533e+07	5.57572e+07	5.86685e+07
P97798	Neogenin	Neo1	90	18	1.433	0.48509	3.35515e+06	3.60255e+06	1.78006e+06	4.89414e+06	4.80641e+06	2.09708e+06
Q5SWU9	Acetyl-CoA carboxylase 1	Acaca	752	64	1.425	0.246465	4.1578e+07	4.12921e+07	6.36277e+07	5.50831e+07	6.64592e+07	5.92544e+07
Q9EST1	Gasdermin-A	Gsdma	4	2	1.422	0.697995	34680.4	15116.6	305985	321460	49311.8	41066
Q9QUR8	Semaphorin-7A	Sema7a	10	4	1.403	0.47046	189203	212718	177218	265532	337780	150516
P17427	AP-2 complex subunit alpha-2	Ap2a2	19	4	1.402	0.999061	1.33926e+06	471629	375245	661221	828839	433202
P13595	Neural cell adhesion molecule 1	Ncam1	270	25	1.401	0.225549	2.98884e+07	2.81013e+07	2.6084e+07	3.93606e+07	4.19757e+07	2.69229e+07
Q8R366	Immunoglobulin superfamily member 8	Igsf8	4	2	1.398	0.654693	92092.1	75569.7	72663	109292	105611	59978.3
Q810U4	Neuronal cell adhesion molecule	Nrcam	108	17	1.395	0.265544	4.96045e+06	5.03128e+06	3.86033e+06	7.96315e+06	6.91748e+06	4.21852e+06
Q6ZQ38	Cullin-associated NEDD8-dissociated protein 1	Cand1	12	6	1.385	0.877689	303177	107137	30327.3	148407	158136	27202.5
E9Q557	Desmoplakin	Dsp	144	41	1.371	0.633298	3.66778e+06	3.68619e+06	6.9537e+07	5.05495e+06	7.77216e+06	4.60696e+06
P20108	Thioredoxin-dependent peroxide reductase, mitochondrial	Prdx3	12	3	1.364	0.807506	427175	417814	1.08114e+06	344131	712789	582772
Q7TSF1	Desmoglein-1-beta	Dsg1b	4	2	1.364	0.666737	99418	115176	2.69383e+06	157053	257955	150266
P54763	Ephrin type-B receptor 2	Ephb2	14	4	1.357	0.418973	702514	704665	465396	980495	953602	502263
P17879	Heat shock 70 kDa protein 1B	Hspa1b	63	4	1.352	0.783692	112100	91840.6	1.53338e+06	115417	371288	151536
P70232	Neural cell adhesion molecule L1-like protein	Chl1	77	12	1.344	0.269544	1.5491e+06	1.35099e+06	1.10493e+06	2.31636e+06	1.81608e+06	1.25084e+06
P70670	Nascent polypeptide-associated complex subunit alpha, muscle-specific form	Naca	7	3	1.336	0.4418	187789	111663	43307.1	149151	201323	106449
Q7TNR6	Immunoglobulin superfamily member 21	Igsf21	7	3	1.328	0.997539	238478	62125.5	64954.6	86270.4	260881	42469.5
P40142	Transketolase	Tkt	102	18	1.324	0.849207	3.20522e+06	3.99838e+06	1.07078e+07	4.35694e+06	7.67041e+06	5.29404e+06
P15116	Cadherin-2	Cdh2	22	3	1.322	0.197924	505514	572317	299154	790740	668163	508348
B2RXS4	Plexin-B2	Plxnb2	125	16	1.297	0.268828	3.81119e+06	3.59065e+06	1.90905e+06	5.1475e+06	4.65529e+06	3.12861e+06
Q7TMD7	Desmoglein-4	Dsg4	4	2	1.293	0.315376	21534.9	43923.2	31600.7	400525	40844.9	38834.4
Q60864	Stress-induced-phosphoprotein 1	Stip1	7	2	1.292	0.61244	196697	112597	266525	135037	254183	308343
Q99PU5	Long-chain-fatty-acid--CoA ligase ACSBG1	Acsbg1	3	2	1.29	0.272794	95884.8	77005.3	54060.5	453762	90694.9	99345.3
Q91ZX7	Prolow-density lipoprotein receptor-related protein 1	Lrp1	88	22	1.29	0.16672	3.14228e+06	2.40329e+06	1.66789e+06	3.01864e+06	4.17675e+06	3.10051e+06
Q61792	LIM and SH3 domain protein 1	Lasp1	37	3	1.275	0.811836	481312	621134	1.10704e+06	507908	1.05471e+06	792154
Q9R171	Cerebellin-1	Cbln1	28	3	1.272	0.275288	323989	318714	98320.4	539727	405394	272568
P17710	Hexokinase-1	Hk1	22	7	1.263	0.877016	5.51896e+06	4.81911e+06	6.37279e+06	3.3597e+06	8.41172e+06	6.97234e+06
P10852	4F2 cell-surface antigen heavy chain	Slc3a2	62	10	1.253	0.334055	2.18505e+06	2.24266e+06	1.00779e+06	3.68679e+06	2.73793e+06	1.59641e+06
Q9CZM2	60S ribosomal protein L15	Rpl15	30	5	1.249	0.529664	2.04077e+06	1.31038e+06	1.24004e+06	1.6361e+06	1.40878e+06	2.19724e+06
Q01768	Nucleoside diphosphate kinase B	Nme2	60	2	1.22	0.930259	474281	505160	1.22708e+06	493674	874866	616315
P07724	Albumin	Alb	302	28	1.205	0.898206	2.63528e+07	2.90255e+07	5.69537e+07	2.54445e+07	4.34495e+07	3.49853e+07
P05201	Aspartate aminotransferase, cytoplasmic	Got1	52	10	1.204	0.861654	1.55718e+06	1.59798e+06	4.91866e+06	1.61201e+06	3.09628e+06	1.92375e+06
P62301	40S ribosomal protein S13	Rps13	15	2	1.2	0.756928	393693	276646	610766	342305	537916	472489
P62264	40S ribosomal protein S14	Rps14	23	2	1.196	0.585605	481494	243171	725176	340368	933170	575883
Q9EQF6	Dihydropyrimidinase-related protein 5	Dpysl5	94	14	1.19	0.902601	5.54427e+06	2.44422e+06	2.40976e+06	2.90836e+06	3.83395e+06	2.59655e+06
Q9JLF6	Protein-glutamine gamma-glutamyltransferase K	Tgm1	7	4	1.189	0.496359	111085	123432	1.94781e+06	146785	151772	117705
O35874	Neutral amino acid transporter A	Slc1a4	5	2	1.188	0.362286	215802	158443	55419.5	188164	273150	158635
P11627	Neural cell adhesion molecule L1	L1cam	151	18	1.185	0.475481	8.58013e+06	6.72619e+06	6.26696e+06	7.97138e+06	9.89583e+06	6.57084e+06
Q91V14	Solute carrier family 12 member 5	Slc12a5	6	2	1.184	0.876171	308476	180973	213440	252793	274543	189214
Q61166	Microtubule-associated protein RP/EB family member 1	Mapre1	7	3	1.177	0.746706	56605	35781.1	42394.9	53389.6	23564.9	49913.8
Q99PT1	Rho GDP-dissociation inhibitor 1	Arhgdia	40	5	1.163	0.415638	2.35118e+06	1.75068e+06	1.84471e+06	1.95218e+06	2.48428e+06	2.14454e+06
P31650	Sodium- and chloride-dependent GABA transporter 3	Slc6a11	23	3	1.154	0.510948	1.53048e+06	1.23207e+06	1.83957e+06	1.29453e+06	2.44552e+06	1.7668e+06
P62806	Histone H4	H4c1	142	10	1.138	0.883112	3.31996e+07	3.76201e+07	5.39442e+07	4.99541e+07	4.28188e+07	3.4322e+07
P62242	40S ribosomal protein S8	Rps8	33	6	1.137	0.68922	1.4573e+06	859252	1.05079e+06	1.48051e+06	1.19512e+06	961074
P35802	Neuronal membrane glycoprotein M6-a	Gpm6a	13	4	1.127	0.428539	956176	602231	673801	759664	1.10116e+06	759148
P80313	T-complex protein 1 subunit eta	Cct7	2	2	1.122	0.952996	273677	113972	158686	138027	178088	190921
P63085	Mitogen-activated protein kinase 1	Mapk1	6	3	1.121	0.91323	403301	314377	269800	466096	352572	226646
P46660	Alpha-internexin	Ina	136	14	1.121	0.793033	3.04052e+06	2.16085e+06	5.53566e+06	1.99564e+06	3.99136e+06	3.40872e+06
Q99LX0	Parkinson disease protein 7 homolog	Park7	7	2	1.112	0.551223	214144	220184	556856	172406	304988	244951
P60202	Myelin proteolipid protein	Plp1	39	6	1.107	0.793255	3.32238e+06	1.55017e+06	5.65869e+06	1.39155e+06	3.67664e+06	3.74587e+06
Q0PMG2	MAM domain-containing glycosylphosphatidylinositol anchor protein 1	Mdga1	4	2	1.105	0.97173	85420.6	89555.3	110758	132698	98986.9	62775
Q99020	Heterogeneous nuclear ribonucleoprotein A/B	Hnrnpab	28	3	1.103	0.905029	1.336e+06	875470	1.89202e+06	887804	1.90783e+06	1.47401e+06
P14115	60S ribosomal protein L27a	Rpl27a	8	2	1.103	0.756639	420423	229020	291451	286114	371651	321543
P14231	Sodium/potassium-transporting ATPase subunit beta-2	Atp1b2	25	4	1.102	0.915004	1.30373e+06	1.36853e+06	1.34506e+06	1.74392e+06	1.48178e+06	987430
Q9D8E6	60S ribosomal protein L4	Rpl4	21	5	1.1	0.764045	689190	432452	570663	452704	721153	627692
Q9CQE1	Protein NipSnap homolog 3B	Nipsnap3b	8	2	1.099	0.623061	193333	173724	464592	152961	269707	212534
P02088	Hemoglobin subunit beta-1	Hbb-b1	61	7	1.098	0.3817	3.71436e+06	1.05971e+07	3.69732e+06	2.193e+06	4.62091e+06	4.0786e+06
P20357	Microtubule-associated protein 2	Map2	44	8	1.097	0.951013	1.27022e+06	996065	1.84492e+06	1.39352e+06	1.48522e+06	1.08288e+06
P15532	Nucleoside diphosphate kinase A	Nme1	57	2	1.094	0.690307	1.76739e+06	2.57217e+06	7.45351e+06	2.8152e+06	3.20144e+06	2.04396e+06
Q8R0Y6	Cytosolic 10-formyltetrahydrofolate dehydrogenase	Aldh1l1	36	7	1.087	0.978715	1.0043e+06	466803	557182	605536	859408	514033
P14148	60S ribosomal protein L7	Rpl7	22	3	1.08	0.955365	690059	348438	559419	307242	684151	604207
Q61937	Nucleophosmin	Npm1	12	2	1.079	0.391476	32242.9	49926.6	279408	10470	53869.8	63761.7
P63158	High mobility group protein B1	Hmgb1	63	4	1.078	0.571806	1.69275e+06	1.56192e+06	1.26006e+06	1.33314e+06	1.91476e+06	1.68426e+06
P70211	Netrin receptor DCC	Dcc	4	2	1.072	0.506815	110044	108835	60102.2	182144	116717	71151.9
Q9WV60	Glycogen synthase kinase-3 beta	Gsk3b	6	2	1.071	0.633259	213404	94533	166547	121250	256453	178397
P55088	Aquaporin-4	Aqp4	10	2	1.069	0.626869	342458	309983	342259	399880	139678	365800
Q61753	D-3-phosphoglycerate dehydrogenase	Phgdh	22	4	1.062	0.711924	865422	510361	522514	554855	720730	442525
P62267	40S ribosomal protein S23	Rps23	15	3	1.061	0.922434	699229	433949	553919	587782	636137	424328
O35098	Dihydropyrimidinase-related protein 4	Dpysl4	7	5	1.056	0.985467	301136	141623	187485	197949	197056	207791
P08249	Malate dehydrogenase, mitochondrial	Mdh2	161	13	1.054	0.65295	7.58249e+06	6.31532e+06	1.65174e+07	5.49846e+06	1.07095e+07	7.99332e+06
P35486	Pyruvate dehydrogenase E1 component subunit alpha, somatic form, mitochondrial	Pdha1	78	10	1.052	0.868329	2.62889e+06	1.48302e+06	3.29641e+06	1.58249e+06	3.50508e+06	2.76691e+06
Q69ZU6	Thrombospondin type-1 domain-containing protein 7A	Thsd7a	8	2	1.052	0.662258	138490	130634	377279	145739	198019	138234
O09061	Proteasome subunit beta type-1	Psmb1	15	2	1.051	0.353801	414831	396153	1.97355e+06	440765	251053	436123
P09405	Nucleolin	Ncl	43	7	1.047	0.462066	1.14451e+06	989445	2.28022e+06	770258	1.31095e+06	1.19794e+06
Q61171	Peroxiredoxin-2	Prdx2	157	11	1.046	0.400821	1.82217e+07	1.95519e+07	3.17019e+07	1.25562e+07	2.19196e+07	2.0458e+07
Q80TJ1	Calcium-dependent secretion activator 1	Cadps	7	3	1.044	0.928507	265948	130182	158331	148345	240871	165315
P60766	Cell division control protein 42 homolog	Cdc42	17	4	1.044	0.597486	738391	515005	573533	598733	632144	442106
P51410	60S ribosomal protein L9	Rpl9	23	4	1.043	0.8404	1.01641e+06	579957	2.21998e+06	1.07141e+06	1.05973e+06	880854
P43275	Histone H1.1	H1-1	35	2	1.042	0.874782	833335	1.21723e+06	734686	1.28419e+06	747002	868626
O54879	High mobility group protein B3	Hmgb3	9	2	1.042	0.643223	296757	284075	331560	309209	315267	251819
P40124	Adenylyl cyclase-associated protein 1	Cap1	13	3	1.034	0.968428	298568	173814	577477	221402	416952	308637
Q920N2	Biotin--protein ligase	Hlcs	17	5	1.03	0.791399	462222	264988	332504	346385	295322	342615
Q9JLM8	Serine/threonine-protein kinase DCLK1	Dclk1	15	4	1.02	0.85929	457825	206591	249041	253511	315347	253971
Q05920	Pyruvate carboxylase, mitochondrial	Pc	2016	61	1.019	0.59314	5.81552e+08	5.43359e+08	4.82228e+08	5.54582e+08	5.53501e+08	5.50527e+08
P63242	Eukaryotic translation initiation factor 5A-1	Eif5a	6	2	1.018	0.383434	502274	523142	1.84581e+06	245813	750838	532455
Q9R1P0	Proteasome subunit alpha type-4	Psma4	18	2	1.017	0.388823	405542	409875	1.70525e+06	416688	580760	225995
P48678	Prelamin-A/C	Lmna	38	12	1.014	0.520371	583255	446934	1.58657e+07	965153	591496	500206
Q9Z2U1	Proteasome subunit alpha type-5	Psma5	4	3	1.013	0.326825	119025	133190	1.20342e+06	134924	55829	136449
Q61330	Contactin-2	Cntn2	201	22	1.011	0.481182	1.06172e+07	9.45229e+06	8.18644e+06	9.55448e+06	9.63056e+06	5.32313e+06
P63017	Heat shock cognate 71 kDa protein	Hspa8	268	22	1.011	0.636584	1.76679e+07	1.41344e+07	3.55373e+07	1.38647e+07	2.20334e+07	1.78572e+07
Q8K310	Matrin-3	Matr3	6	3	1.008	0.643174	631245	357089	409427	412505	481087	343765
Q5F226	Protocadherin Fat 2	Fat2	126	27	1.006	0.726742	3.7185e+06	3.47848e+06	3.20767e+06	4.51727e+06	3.49974e+06	1.93511e+06
Q91VR5	ATP-dependent RNA helicase DDX1	Ddx1	3	2	1.004	0.823189	97121.6	34639.1	169762	30852.6	120906	97538.3
P51880	Fatty acid-binding protein, brain	Fabp7	39	4	0.999	0.783643	4.82503e+06	3.73827e+06	6.07133e+06	3.05846e+06	5.99161e+06	4.81847e+06
Q922B2	Aspartate--tRNA ligase, cytoplasmic	Dars1	3	3	0.997	0.999018	137675	86617.4	60220	151918	86369.1	54812.7
Q9R0K7	Plasma membrane calcium-transporting ATPase 2	Atp2b2	19	2	0.993	0.73238	212861	123940	193970	280170	192540	129172
P62852	40S ribosomal protein S25	Rps25	28	3	0.989	0.648859	799583	922136	1.51937e+06	911805	1.04747e+06	854870
Q9Z2U0	Proteasome subunit alpha type-7	Psma7	19	4	0.988	0.569938	467423	367593	2.11905e+06	348906	720948	461863
P62717	60S ribosomal protein L18a	Rpl18a	11	3	0.988	0.83693	688558	433611	647822	640056	649385	404509
Q99PJ0	Neurotrimin	Ntm	13	2	0.986	0.499475	593360	639037	256169	883604	585240	423649
O88507	Ciliary neurotrophic factor receptor subunit alpha	Cntfr	36	5	0.986	0.973652	1.61112e+06	1.42912e+06	1.79208e+06	2.52829e+06	1.5888e+06	996284
P00493	Hypoxanthine-guanine phosphoribosyltransferase	Hprt1	19	4	0.985	0.937959	360873	576445	1.11226e+06	516978	721577	567776
E9PVD3	Protocadherin-16	Dchs1	30	11	0.985	0.758246	1.03841e+06	942747	663784	1.0532e+06	928535	780851
O70133	ATP-dependent RNA helicase A	Dhx9	31	9	0.984	0.449216	748353	430320	398817	423243	486459	350536
Q791V5	Mitochondrial carrier homolog 2	Mtch2	2	2	0.983	0.624872	251618	145649	166346	178010	163544	157405
P43006	Excitatory amino acid transporter 2	Slc1a2	33	4	0.981	0.526809	1.14478e+06	1.04818e+06	1.39255e+06	1.1227e+06	2.99296e+06	1.07375e+06
P70677	Caspase-3	Casp3	20	5	0.978	0.5207	951085	1.02777e+06	1.88464e+06	979906	1.13028e+06	1.00495e+06
P84091	AP-2 complex subunit mu	Ap2m1	12	4	0.973	0.831578	1.19314e+06	849652	1.1979e+06	1.16036e+06	1.26043e+06	918603
P24369	Peptidyl-prolyl cis-trans isomerase B	Ppib	86	11	0.972	0.487914	3.60422e+06	3.06925e+06	4.15166e+06	2.11808e+06	3.8135e+06	3.50443e+06
O88809	Neuronal migration protein doublecortin	Dcx	14	3	0.972	0.850357	272566	227232	266236	258717	347287	157948
P62827	GTP-binding nuclear protein Ran	Ran	100	8	0.972	0.476072	5.15464e+06	2.98269e+06	4.74638e+06	6.74115e+06	4.61168e+06	4.03332e+06
P97792	Coxsackievirus and adenovirus receptor homolog	Cxadr	5	3	0.969	0.69421	204883	227969	95003.7	296076	198551	121758
Q9D0M3	Cytochrome c1, heme protein, mitochondrial	Cyc1	7	3	0.966	0.834982	413444	284283	196062	261797	274570	275074
P30275	Creatine kinase U-type, mitochondrial	Ckmt1	16	4	0.964	0.402414	304730	281722	2.72004e+06	182346	408686	293754
P97427	Dihydropyrimidinase-related protein 1	Crmp1	140	9	0.964	0.910715	4.94064e+06	2.50939e+06	3.07759e+06	2.65914e+06	4.41723e+06	2.96579e+06
P61979	Heterogeneous nuclear ribonucleoprotein K	Hnrnpk	19	6	0.96	0.615976	1.0426e+06	770074	1.87437e+06	729700	1.24454e+06	1.00128e+06
P56564	Excitatory amino acid transporter 1	Slc1a3	36	3	0.96	0.722785	3.36696e+06	2.40843e+06	2.89995e+06	2.7845e+06	3.62603e+06	2.71435e+06
Q61598	Rab GDP dissociation inhibitor beta	Gdi2	83	4	0.955	0.608507	1.89808e+06	1.18682e+06	1.27579e+06	1.06735e+06	1.60991e+06	1.21859e+06
P60122	RuvB-like 1	Ruvbl1	10	2	0.955	0.359275	128956	81311.6	67053.3	77657.3	56510.8	78460.7
P00405	Cytochrome c oxidase subunit 2	Mtco2	13	3	0.953	0.623045	1.6194e+06	377971	635669	605508	628618	487695
P10853	Histone H2B type 1-F/J/L	H2bc7	224	3	0.951	0.674114	4.41067e+07	5.8793e+07	8.5014e+07	4.74241e+07	6.2199e+07	5.59292e+07
Q9Z1N5	Spliceosome RNA helicase Ddx39b	Ddx39b	52	8	0.948	0.89322	2.47683e+06	1.30704e+06	2.37408e+06	2.24984e+06	2.40048e+06	1.58182e+06
P30681	High mobility group protein B2	Hmgb2	52	3	0.945	0.467484	812739	899642	979463	674301	944112	849783
P63011	Ras-related protein Rab-3A	Rab3a	45	4	0.944	0.941911	2.20831e+06	1.49817e+06	1.93638e+06	1.39969e+06	2.63387e+06	1.8283e+06
Q9EQH3	Vacuolar protein sorting-associated protein 35	Vps35	3	2	0.941	0.711355	223435	61855.8	115652	62929.2	137567	108844
P62874	Guanine nucleotide-binding protein G(I)/G(S)/G(T) subunit beta-1	Gnb1	67	5	0.938	0.188343	5.07827e+06	3.05969e+06	3.13664e+06	2.94361e+06	2.97122e+06	1.65687e+06
P57780	Alpha-actinin-4	Actn4	9	4	0.938	0.659957	845931	558856	1.34115e+06	392877	1.14425e+06	793386
Q9WV92	Band 4.1-like protein 3	Epb41l3	16	4	0.936	0.889161	328840	221301	320144	189197	369573	299695
P63001	Ras-related C3 botulinum toxin substrate 1	Rac1	38	5	0.936	0.885677	3.99418e+06	2.4695e+06	3.2468e+06	3.03884e+06	4.17699e+06	2.27554e+06
P61264	Syntaxin-1B	Stx1b	12	3	0.935	0.399584	266732	222965	198518	208412	237482	146888
Q8VDN2	Sodium/potassium-transporting ATPase subunit alpha-1	Atp1a1	223	5	0.932	0.878224	1.0371e+06	743718	1.1341e+06	824414	1.19177e+06	966340
Q99P72	Reticulon-4	Rtn4	12	2	0.93	0.777032	286597	225829	401163	260264	316601	266418
P39053	Dynamin-1	Dnm1	30	2	0.926	0.587507	904759	501567	618241	288812	873810	572679
P56480	ATP synthase subunit beta, mitochondrial	Atp5f1b	57	10	0.919	0.656903	3.41432e+06	2.36825e+06	7.4438e+06	2.42395e+06	4.50654e+06	3.13792e+06
P11983	T-complex protein 1 subunit alpha	Tcp1	33	8	0.916	0.776227	1.73826e+06	522076	976687	725934	967964	894532
P20152	Vimentin	Vim	179	22	0.909	0.660142	1.11006e+07	6.0453e+06	9.56217e+06	5.08765e+06	8.69421e+06	9.83902e+06
P07901	Heat shock protein HSP 90-alpha	Hsp90aa1	156	12	0.907	0.915675	6.44556e+06	2.88945e+06	5.33338e+06	3.57828e+06	6.34416e+06	4.83558e+06
P53026	60S ribosomal protein L10a	Rpl10a	19	4	0.906	0.801648	956912	744216	1.18608e+06	867129	1.20213e+06	682749
Q91XV3	Brain acid soluble protein 1	Basp1	19	3	0.905	0.427254	769790	1.24327e+06	597962	853373	696713	451799
P50247	Adenosylhomocysteinase	Ahcy	19	4	0.903	0.49333	749477	503855	2.34807e+06	677011	775672	529896
P46096	Synaptotagmin-1	Syt1	9	2	0.902	0.917135	460427	302608	468661	288808	506410	415248
Q9D2G2	Dihydrolipoyllysine-residue succinyltransferase component of 2-oxoglutarate dehydrogenase complex, mitochondrial	Dlst	4	2	0.898	0.645194	185860	135949	367380	140013	238957	166870
P62245	40S ribosomal protein S15a	Rps15a	39	6	0.898	0.327398	2.03763e+06	1.6694e+06	3.40046e+06	1.82924e+06	1.95865e+06	1.40919e+06
P53994	Ras-related protein Rab-2A	Rab2a	13	3	0.897	0.465903	513294	332018	412663	377634	370109	359056
Q60668	Heterogeneous nuclear ribonucleoprotein D0	Hnrnpd	24	2	0.897	0.901858	1.25272e+06	843930	1.46141e+06	759899	1.62411e+06	1.12336e+06
Q91ZA3	Propionyl-CoA carboxylase alpha chain, mitochondrial	Pcca	1297	47	0.897	0.386567	2.31465e+08	2.6729e+08	3.00787e+08	2.52405e+08	2.39572e+08	2.39671e+08
O70456	14-3-3 protein sigma	Sfn	44	4	0.896	0.753712	100797	103188	1.1503e+06	537460	86974.1	92416.9
Q9Z2H5	Band 4.1-like protein 1	Epb41l1	3	2	0.892	0.803584	125553	69838.2	125589	112054	147969	81736.3
Q5SQX6	Cytoplasmic FMR1-interacting protein 2	Cyfip2	3	2	0.891	0.427912	219434	104932	126760	92052.1	140765	112991
P02301	Histone H3.3C	H3-5	60	5	0.891	0.83461	2.43328e+07	1.51772e+07	2.72071e+07	2.16697e+07	2.32323e+07	1.74176e+07
P35492	Histidine ammonia-lyase	Hal	2	2	0.89	0.500606	98296.9	62461.9	768965	98105.1	83099	87505.8
P70124	Serpin B5	Serpinb5	3	3	0.89	0.37851	77229.4	65732.2	692462	68735.5	69315.5	57274.7
P05132	cAMP-dependent protein kinase catalytic subunit alpha	Prkaca	7	3	0.89	0.969221	790624	510614	180779	454391	454237	333643
P34884	Macrophage migration inhibitory factor	Mif	152	4	0.889	0.734336	8.26638e+06	2.52334e+07	5.74469e+07	2.24204e+07	4.84019e+07	2.21308e+07
Q9R0P5	Destrin	Dstn	27	3	0.888	0.479669	493258	447832	1.04443e+06	401092	633446	438107
Q91V41	Ras-related protein Rab-14	Rab14	17	2	0.887	0.865917	470635	212537	33443.3	290129	35331.7	188616
O08709	Peroxiredoxin-6	Prdx6	11	3	0.883	0.622288	301439	267151	1.49441e+06	673654	234182	266159
P06837	Neuromodulin	Gap43	17	3	0.881	0.97402	878231	925576	629267	774154	1.11148e+06	607873
Q8BLK3	Limbic system-associated membrane protein	Lsamp	27	4	0.88	0.844846	1.33721e+06	1.31154e+06	933579	1.78164e+06	1.15442e+06	649332
P17225	Polypyrimidine tract-binding protein 1	Ptbp1	4	2	0.879	0.314004	165668	120856	311098	49300.6	165289	145563
Q91YQ5	Dolichyl-diphosphooligosaccharide--protein glycosyltransferase subunit 1	Rpn1	11	4	0.879	0.324022	473062	267320	211354	174633	253505	234872
P46638	Ras-related protein Rab-11B	Rab11b	8	3	0.872	0.318977	266934	190075	951303	271424	232805	100454
O08599	Syntaxin-binding protein 1	Stxbp1	38	10	0.872	0.697286	3.03832e+06	1.49175e+06	1.84897e+06	1.49731e+06	2.48973e+06	1.61181e+06
P41105	60S ribosomal protein L28	Rpl28	14	2	0.87	0.687564	494516	270090	551077	389227	621297	430366
P48758	Carbonyl reductase	Cbr1	7	2	0.87	0.692507	303894	216788	334920	251970	275979	264411
Q9JHR7	Insulin-degrading enzyme	Ide	13	8	0.869	0.399146	291327	215904	4.59709e+06	253215	279113	183370
Q921F2	TAR DNA-binding protein 43	Tardbp	38	7	0.869	0.869899	1.98381e+06	1.69817e+06	956638	1.47593e+06	1.63018e+06	1.17569e+06
Q6PIC6	Sodium/potassium-transporting ATPase subunit alpha-3	Atp1a3	416	22	0.868	0.853197	2.56118e+07	1.41571e+07	2.76704e+07	1.6198e+07	3.31995e+07	2.22367e+07
P07356	Annexin A2	Anxa2	44	12	0.866	0.356373	1.36301e+06	937010	1.6006e+07	1.17991e+06	1.28672e+06	559075
Q99K48	Non-POU domain-containing octamer-binding protein	Nono	12	2	0.862	0.307762	408422	318327	713784	352536	352026	284067
P97351	40S ribosomal protein S3a	Rps3a	13	4	0.859	0.516269	437729	362669	639042	376030	482408	370203
P26645	Myristoylated alanine-rich C-kinase substrate	Marcks	11	2	0.858	0.703706	470396	377125	807709	375284	663269	403632
P97300	Neuroplastin	Nptn	12	2	0.858	0.375623	338435	397269	657250	467799	340799	244132
P08551	Neurofilament light polypeptide	Nefl	85	8	0.857	0.524893	1.52506e+06	786304	2.23938e+06	605026	1.3065e+06	1.44024e+06
P47963	60S ribosomal protein L13	Rpl13	8	2	0.855	0.686599	308572	186332	241931	282452	206744	185244
P18760	Cofilin-1	Cfl1	74	7	0.851	0.626625	4.55447e+06	4.27558e+06	5.61598e+06	3.18944e+06	6.21691e+06	3.87809e+06
P63101	14-3-3 protein zeta/delta	Ywhaz	121	9	0.849	0.152993	6.57629e+06	6.23523e+06	8.74186e+06	5.5845e+06	6.48474e+06	4.4967e+06
P19783	Cytochrome c oxidase subunit 4 isoform 1, mitochondrial	Cox4i1	16	4	0.848	0.47372	413836	403755	344543	301355	422830	342308
Q9CX86	Heterogeneous nuclear ribonucleoprotein A0	Hnrnpa0	31	3	0.847	0.529759	2.07451e+06	825203	1.27798e+06	1.08207e+06	435669	1.69936e+06
P80317	T-complex protein 1 subunit zeta	Cct6a	7	3	0.846	0.759556	498815	240566	338870	264173	417582	286596
Q62261	Spectrin beta chain, non-erythrocytic 1	Sptbn1	25	11	0.845	0.661217	1.1909e+06	499678	759320	490908	920967	641997
Q9D0M5	Dynein light chain 2, cytoplasmic	Dynll2	22	3	0.845	0.315151	739411	622368	1.46253e+06	746078	624902	507251
O08553	Dihydropyrimidinase-related protein 2	Dpysl2	254	16	0.842	0.879901	1.44064e+07	6.82327e+06	9.96971e+06	7.03614e+06	1.43332e+07	8.3911e+06
Q91V12	Cytosolic acyl coenzyme A thioester hydrolase	Acot7	32	6	0.841	0.62087	2.30215e+06	1.44385e+06	2.04227e+06	1.20288e+06	2.26407e+06	1.71834e+06
P20029	Endoplasmic reticulum chaperone BiP	Hspa5	85	11	0.838	0.381519	1.07983e+06	913501	3.02839e+06	871460	1.08316e+06	905115
Q6PIE5	Sodium/potassium-transporting ATPase subunit alpha-2	Atp1a2	285	8	0.833	0.941935	2.77606e+06	1.47067e+06	2.58229e+06	1.78934e+06	2.59408e+06	2.15202e+06
P09411	Phosphoglycerate kinase 1	Pgk1	41	8	0.832	0.632265	2.64837e+06	1.56488e+06	4.15218e+06	1.66219e+06	2.82374e+06	2.20252e+06
Q8R464	Cell adhesion molecule 4	Cadm4	68	9	0.831	0.923438	2.02407e+06	2.05304e+06	1.34629e+06	2.40523e+06	1.68229e+06	1.28896e+06
O88935	Synapsin-1	Syn1	11	3	0.831	0.570081	441542	144091	278676	163872	231441	238061
P62137	Serine/threonine-protein phosphatase PP1-alpha catalytic subunit	Ppp1ca	17	3	0.83	0.339112	553365	473367	961604	412248	586687	459256
P68510	14-3-3 protein eta	Ywhah	45	4	0.828	0.605995	462448	300746	205502	369474	249057	185051
Q8VDD5	Myosin-9	Myh9	23	5	0.828	0.388293	184783	140907	3.00467e+06	167443	123522	152940
P35979	60S ribosomal protein L12	Rpl12	35	4	0.828	0.7001	2.30816e+06	1.53293e+06	3.03587e+06	1.91028e+06	2.49669e+06	1.68419e+06
P21107	Tropomyosin alpha-3 chain	Tpm3	11	3	0.827	0.38981	219155	172157	1.98714e+06	99134.5	312669	181263
O08749	Dihydrolipoyl dehydrogenase, mitochondrial	Dld	9	3	0.827	0.616182	314777	227198	266844	192489	329622	220549
P11276	Fibronectin	Fn1	98	21	0.825	0.740835	2.62593e+06	2.25496e+06	3.21122e+06	1.75668e+06	2.16535e+06	3.79339e+06
Q9ERD7	Tubulin beta-3 chain	Tubb3	641	9	0.823	0.319086	1.04091e+07	5.4611e+06	4.64133e+06	4.49429e+06	6.31518e+06	3.08836e+06
P17751	Triosephosphate isomerase	Tpi1	48	7	0.822	0.566293	1.53847e+06	1.6941e+06	5.10904e+06	1.39256e+06	3.05806e+06	1.27502e+06
Q80X72	Leucine-rich repeat-containing protein 15	Lrrc15	3	2	0.821	0.486592	58727.4	92973.1	89743.4	1.78024e+06	73722	60561.7
Q9QUM9	Proteasome subunit alpha type-6	Psma6	12	4	0.821	0.615603	533095	317765	2.06241e+06	379839	760273	437476
P51150	Ras-related protein Rab-7a	Rab7a	15	2	0.82	0.235051	562785	421659	1.11956e+06	461746	486640	139279
Q64436	Potassium-transporting ATPase alpha chain 1	Atp4a	74	2	0.82	0.972153	688839	474349	683933	561009	779176	501037
P61205	ADP-ribosylation factor 3	Arf3	37	4	0.82	0.559229	1.97281e+06	1.33365e+06	2.75568e+06	1.4143e+06	2.00152e+06	1.61743e+06
P09103	Protein disulfide-isomerase	P4hb	3	2	0.818	0.321575	36495.5	44845	440678	36697.4	45980.4	18771.1
P61255	60S ribosomal protein L26	Rpl26	26	4	0.818	0.584623	719943	417760	1.66446e+06	588780	715435	542193
P23198	Chromobox protein homolog 3	Cbx3	9	2	0.814	0.665127	459135	460696	337115	359326	446105	373607
P99029	Peroxiredoxin-5, mitochondrial	Prdx5	5	2	0.813	0.242042	263143	276969	495028	193398	299238	225235
Q9CWF2	Tubulin beta-2B chain	Tubb2b	1012	2	0.812	0.446145	2.21297e+08	1.15616e+08	1.33216e+08	1.06051e+08	1.60785e+08	1.0818e+08
P62754	40S ribosomal protein S6	Rps6	21	3	0.812	0.755634	1.05003e+06	631242	1.13284e+06	852624	964710	743431
O88342	WD repeat-containing protein 1	Wdr1	47	5	0.811	0.715543	1.5468e+06	1.06014e+06	1.46857e+06	1.19066e+06	1.57579e+06	1.0541e+06
P60867	40S ribosomal protein S20	Rps20	19	2	0.81	0.698506	1.09771e+06	687139	2.30262e+06	873689	1.36574e+06	888624
Q9DBP5	UMP-CMP kinase	Cmpk1	7	3	0.808	0.386621	172272	191075	1.04209e+06	106284	287536	154470
Q9QYR9	Acyl-coenzyme A thioesterase 2, mitochondrial	Acot2	3	2	0.806	0.931957	192920	110390	35808.4	89001.7	109270	67728
P62830	60S ribosomal protein L23	Rpl23	18	3	0.806	0.845411	836504	439220	806255	649953	845485	453675
P17182	Alpha-enolase	Eno1	75	11	0.806	0.484989	4.9726e+06	3.63311e+06	2.24723e+07	4.00817e+06	6.49957e+06	3.63898e+06
P31324	cAMP-dependent protein kinase type II-beta regulatory subunit	Prkar2b	34	6	0.806	0.101144	1.65217e+06	1.48743e+06	1.2594e+06	1.19877e+06	1.25911e+06	926899
Q62277	Synaptophysin	Syp	5	2	0.806	0.55427	670685	400818	561002	395695	583418	452104
Q9R0P9	Ubiquitin carboxyl-terminal hydrolase isozyme L1	Uchl1	48	7	0.803	0.597692	2.22767e+06	1.74108e+06	2.57139e+06	1.39704e+06	2.69897e+06	1.78961e+06
P80318	T-complex protein 1 subunit gamma	Cct3	7	2	0.802	0.514923	560102	364763	1.16405e+06	322192	683857	449455
P54227	Stathmin	Stmn1	19	4	0.799	0.379038	1.264e+06	1.25821e+06	1.1201e+06	1.00576e+06	1.34062e+06	782522
P62702	40S ribosomal protein S4, X isoform	Rps4x	25	7	0.799	0.291565	1.60844e+06	1.1154e+06	2.07074e+06	1.28446e+06	1.3961e+06	913512
P47911	60S ribosomal protein L6	Rpl6	40	6	0.796	0.339842	2.30571e+06	1.50762e+06	2.10708e+06	1.67725e+06	1.82411e+06	1.46319e+06
Q9CXW4	60S ribosomal protein L11	Rpl11	29	3	0.795	0.271719	876856	698222	1.4818e+06	615921	780962	696908
Q62425	Cytochrome c oxidase subunit NDUFA4	Ndufa4	7	2	0.793	0.221611	341958	274856	260899	238052	217975	84249.1
P17426	AP-2 complex subunit alpha-1	Ap2a1	21	3	0.793	0.31807	95899	65758.9	65134.9	82556.3	52123.8	39446
Q9D051	Pyruvate dehydrogenase E1 component subunit beta, mitochondrial	Pdhb	8	3	0.792	0.736217	341857	199846	297091	203434	334540	235396
Q60931	Voltage-dependent anion-selective channel protein 3	Vdac3	59	7	0.789	0.591108	6.47265e+06	3.96118e+06	8.22903e+06	3.68975e+06	6.85099e+06	5.10984e+06
P61027	Ras-related protein Rab-10	Rab10	27	3	0.789	0.726545	1.29958e+06	639181	1.18373e+06	934161	1.02277e+06	779812
O55131	Septin-7	Septin7	5	2	0.782	0.551488	235596	121230	203566	193709	159132	114931
P70372	ELAV-like protein 1	Elavl1	10	4	0.782	0.87345	301232	55043.6	214779	164017	171348	167864
Q8BGT8	Phytanoyl-CoA hydroxylase-interacting protein-like	Phyhipl	10	4	0.777	0.460962	347166	231154	361108	269655	294039	246484
Q91VR2	ATP synthase subunit gamma, mitochondrial	Atp5f1c	5	2	0.775	0.560382	325706	140276	253706	132124	246501	196667
P70202	Latexin	Lxn	16	4	0.772	0.119822	671083	776712	1.0484e+06	599952	551908	606417
P19096	Fatty acid synthase	Fasn	54	20	0.771	0.32205	3.19678e+06	1.38969e+06	2.04053e+06	1.6291e+06	1.57415e+06	1.3816e+06
P48962	ADP/ATP translocase 1	Slc25a4	180	8	0.771	0.437787	2.38949e+07	1.72211e+07	3.1767e+07	1.65848e+07	2.45264e+07	1.84136e+07
P63038	60 kDa heat shock protein, mitochondrial	Hspd1	10	3	0.77	0.553665	386677	190955	1.04078e+06	297642	405284	219168
P25444	40S ribosomal protein S2	Rps2	17	6	0.767	0.803604	1.35564e+06	331113	1.75657e+06	848379	1.40136e+06	1.04002e+06
P62835	Ras-related protein Rap-1A	Rap1a	7	4	0.766	0.102844	570349	465296	661892	394370	436824	452667
Q9CR68	Cytochrome b-c1 complex subunit Rieske, mitochondrial	Uqcrfs1	4	3	0.766	0.313191	413748	339031	215651	259654	286168	171359
P15105	Glutamine synthetase	Glul	27	5	0.765	0.512247	672781	436252	1.1651e+06	378649	806040	514376
Q62188	Dihydropyrimidinase-related protein 3	Dpysl3	160	8	0.763	0.948026	4.45225e+06	2.26914e+06	4.09266e+06	2.63311e+06	4.74648e+06	3.12394e+06
G5E829	Plasma membrane calcium-transporting ATPase 1	Atp2b1	23	3	0.761	0.796507	660469	430456	709601	483486	705203	502487
Q9R1P4	Proteasome subunit alpha type-1	Psma1	7	2	0.76	0.403728	332702	224136	1.19619e+06	223458	320126	252862
Q60900	ELAV-like protein 3	Elavl3	28	3	0.759	0.485169	833867	536767	951078	632759	704066	612997
P62281	40S ribosomal protein S11	Rps11	45	6	0.759	0.556646	2.6058e+06	1.65397e+06	3.67119e+06	1.97668e+06	2.57138e+06	1.88367e+06
Q8BFR5	Elongation factor Tu, mitochondrial	Tufm	14	5	0.757	0.41888	675571	457431	1.24292e+06	511155	718528	414075
P29341	Polyadenylate-binding protein 1	Pabpc1	20	5	0.75	0.204083	716569	545414	990661	601587	468979	537489
P46460	Vesicle-fusing ATPase	Nsf	16	9	0.747	0.92498	119887	70215.5	123671	64014.4	164221	89558.7
Q8JZK9	Hydroxymethylglutaryl-CoA synthase, cytoplasmic	Hmgcs1	7	3	0.745	0.749	828224	383058	762697	438565	721496	568556
Q8K0T0	Reticulon-1	Rtn1	18	2	0.745	0.359952	622430	325838	397152	258548	467195	295777
Q9DCX2	ATP synthase subunit d, mitochondrial	Atp5pd	4	2	0.745	0.18099	279050	237681	189581	90082.9	192963	176978
Q9EQU5	Protein SET	Set	11	2	0.744	0.324873	296127	436417	1.30066e+06	325734	324818	284865
P62908	40S ribosomal protein S3	Rps3	80	11	0.744	0.496804	2.66839e+06	1.7612e+06	4.87134e+06	1.892e+06	2.86342e+06	1.98424e+06
Q9CQQ7	ATP synthase F(0) complex subunit B1, mitochondrial	Atp5pb	13	3	0.742	0.202946	672188	472225	694065	498846	547089	376640
Q02053	Ubiquitin-like modifier-activating enzyme 1	Uba1	47	12	0.741	0.443138	4.55304e+06	2.91124e+06	6.27887e+06	2.48745e+06	4.72526e+06	3.37205e+06
P27773	Protein disulfide-isomerase A3	Pdia3	15	5	0.74	0.13287	657887	595764	785856	467593	644991	487110
P18872	Guanine nucleotide-binding protein G(o) subunit alpha	Gnao1	51	8	0.739	0.416417	3.03068e+06	1.96127e+06	2.55361e+06	1.88604e+06	2.7982e+06	1.65527e+06
Q9QUI0	Transforming protein RhoA	Rhoa	18	4	0.737	0.154188	1.0966e+06	707035	887402	653781	739354	382046
P16330	2',3'-cyclic-nucleotide 3'-phosphodiesterase	Cnp	98	15	0.733	0.501398	5.11551e+06	2.31679e+06	7.47919e+06	2.08414e+06	3.75118e+06	4.46381e+06
Q9DB20	ATP synthase subunit O, mitochondrial	Atp5po	7	2	0.731	0.450498	396352	267674	447388	289651	411710	216705
P10126	Elongation factor 1-alpha 1	Eef1a1	279	7	0.73	0.444631	5.39007e+07	3.72857e+07	1.11928e+08	3.7279e+07	5.96061e+07	3.93305e+07
P49312	Heterogeneous nuclear ribonucleoprotein A1	Hnrnpa1	61	9	0.729	0.796682	3.71937e+06	1.63976e+06	4.44899e+06	2.21696e+06	3.39994e+06	2.7126e+06
Q9D0E1	Heterogeneous nuclear ribonucleoprotein M	Hnrnpm	17	2	0.729	0.307909	347297	218510	609909	154147	321851	253170
O55143	Sarcoplasmic/endoplasmic reticulum calcium ATPase 2	Atp2a2	22	6	0.729	0.160684	890552	571310	784055	481785	629626	571442
P61982	14-3-3 protein gamma	Ywhag	81	5	0.724	0.418319	4.08143e+06	2.27568e+06	3.61467e+06	2.6168e+06	3.46518e+06	1.87774e+06
Q9WUM4	Coronin-1C	Coro1c	6	3	0.724	0.449904	363884	221693	331989	219111	315952	240318
Q8C1B7	Septin-11	Septin11	17	3	0.724	0.557691	670550	377431	668286	273061	679914	483526
P14685	26S proteasome non-ATPase regulatory subunit 3	Psmd3	6	3	0.723	0.0767855	412415	253473	309242	237412	164965	223546
Q8CI94	Glycogen phosphorylase, brain form	Pygb	33	10	0.722	0.58324	1.20228e+06	436425	773827	479727	821481	558442
Q99KI0	Aconitate hydratase, mitochondrial	Aco2	95	15	0.719	0.781596	4.15449e+06	1.78864e+06	4.00913e+06	2.25611e+06	3.4744e+06	2.88206e+06
P68369	Tubulin alpha-1A chain	Tuba1a	691	6	0.718	0.432163	2.00808e+08	1.16775e+08	1.52074e+08	1.07904e+08	1.71035e+08	1.0924e+08
P14211	Calreticulin	Calr	25	5	0.714	0.295955	1.10246e+06	775729	1.32544e+06	787140	1.01483e+06	704405
P42932	T-complex protein 1 subunit theta	Cct8	32	7	0.712	0.622237	1.32999e+06	690393	1.20664e+06	791199	1.11855e+06	858709
Q9CPU0	Lactoylglutathione lyase	Glo1	22	3	0.711	0.350164	735002	1.02263e+06	1.56037e+06	639288	1.0689e+06	727133
P47738	Aldehyde dehydrogenase, mitochondrial	Aldh2	9	3	0.711	0.387361	291991	204001	1.27299e+06	352702	207602	158950
Q9D6M3	Mitochondrial glutamate carrier 1	Slc25a22	7	2	0.708	0.474625	268226	184958	252438	178849	262570	176766
P05063	Fructose-bisphosphate aldolase C	Aldoc	48	8	0.708	0.367907	1.60934e+06	714334	1.23401e+06	775707	873988	914696
P16125	L-lactate dehydrogenase B chain	Ldhb	49	6	0.708	0.3267	5.54192e+06	3.4584e+06	5.29391e+06	3.66336e+06	4.14308e+06	3.74788e+06
Q62167	ATP-dependent RNA helicase DDX3X	Ddx3x	10	4	0.706	0.463848	85616.7	41627.1	397013	60454	66367.6	58741.7
P14152	Malate dehydrogenase, cytoplasmic	Mdh1	44	7	0.706	0.495654	2.75235e+06	1.98363e+06	3.03699e+06	1.73027e+06	3.0369e+06	1.94199e+06
P62631	Elongation factor 1-alpha 2	Eef1a2	198	4	0.705	0.704303	1.16432e+06	663165	1.55873e+06	820715	1.42695e+06	682011
Q68FD5	Clathrin heavy chain 1	Cltc	221	33	0.704	0.360379	1.09266e+07	4.83781e+06	7.60178e+06	5.35224e+06	6.64578e+06	4.87856e+06
Q03265	ATP synthase subunit alpha, mitochondrial	Atp5f1a	197	20	0.704	0.58193	1.78857e+07	9.44371e+06	2.0023e+07	1.01328e+07	1.61585e+07	1.25916e+07
P63005	Platelet-activating factor acetylhydrolase IB subunit beta	Pafah1b1	16	4	0.701	0.524115	1.14351e+06	715353	1.45323e+06	757892	1.15762e+06	801576
P14094	Sodium/potassium-transporting ATPase subunit beta-1	Atp1b1	56	5	0.696	0.503578	4.41706e+06	2.61957e+06	4.63815e+06	2.75105e+06	3.93959e+06	3.07416e+06
Q04447	Creatine kinase B-type	Ckb	102	12	0.695	0.471595	8.47393e+06	6.17145e+06	9.90298e+06	5.88591e+06	9.77616e+06	4.96194e+06
P14733	Lamin-B1	Lmnb1	64	11	0.69	0.293273	3.06679e+06	1.49896e+06	2.44851e+06	1.36965e+06	1.9681e+06	1.69025e+06
C0HKE3	Histone H2A type 1-D	H2ac7	162	2	0.69	0.253229	4.70364e+07	6.4509e+07	7.28249e+07	6.09987e+07	4.45295e+07	3.77033e+07
Q7TQI3	Ubiquitin thioesterase OTUB1	Otub1	3	2	0.689	0.253878	147444	105569	409570	88228.1	102897	101650
P03995	Glial fibrillary acidic protein	Gfap	275	12	0.688	0.0852527	3.07e+06	2.25134e+06	3.21599e+06	1.50841e+06	2.11368e+06	2.23545e+06
Q60932	Voltage-dependent anion-selective channel protein 1	Vdac1	109	12	0.686	0.459877	8.71079e+06	3.96678e+06	1.31484e+07	3.20405e+06	7.96103e+06	5.97685e+06
P06151	L-lactate dehydrogenase A chain	Ldha	63	9	0.685	0.412823	7.46689e+06	4.76889e+06	7.99078e+06	5.11479e+06	6.62001e+06	4.97175e+06
P50580	Proliferation-associated protein 2G4	Pa2g4	19	4	0.683	0.387223	512416	315819	774096	282765	505600	349836
P26041	Moesin	Msn	12	2	0.682	0.105561	486012	412015	732614	283045	411922	331418
Q9D6F9	Tubulin beta-4A chain	Tubb4a	680	3	0.676	0.223264	897796	365138	256077	267146	246977	186426
Q9CZU6	Citrate synthase, mitochondrial	Cs	23	4	0.676	0.344843	1.02336e+06	680246	1.35973e+06	655820	961844	692087
P63323	40S ribosomal protein S12	Rps12	11	3	0.675	0.0403096	524056	434384	583902	353720	414804	316452
P14131	40S ribosomal protein S16	Rps16	6	2	0.672	0.603495	681661	316187	1.11259e+06	381462	457772	678344
Q99N28	Cell adhesion molecule 3	Cadm3	52	8	0.663	0.573457	2.52966e+06	2.56814e+06	1.45189e+06	2.77585e+06	1.67743e+06	1.1089e+06
P99024	Tubulin beta-5 chain	Tubb5	921	5	0.662	0.215452	2.08004e+07	1.17567e+07	1.60589e+07	1.06269e+07	1.44978e+07	1.04226e+07
P62259	14-3-3 protein epsilon	Ywhae	79	10	0.658	0.24835	9.54186e+06	6.47788e+06	1.31569e+07	6.27472e+06	8.39844e+06	5.68737e+06
Q8VIJ6	Splicing factor, proline- and glutamine-rich	Sfpq	24	5	0.657	0.0883192	1.09275e+06	742780	1.11891e+06	743917	520628	717572
P68040	Receptor of activated protein C kinase 1	Rack1	74	11	0.654	0.208181	4.37252e+06	3.05625e+06	7.31999e+06	2.5824e+06	3.38163e+06	2.86088e+06
Q61553	Fascin	Fscn1	56	8	0.654	0.624708	3.59921e+06	1.96376e+06	3.80238e+06	2.35281e+06	3.29388e+06	2.34764e+06
P51881	ADP/ATP translocase 2	Slc25a5	157	5	0.653	0.958745	3.05289e+06	1.10014e+06	3.09701e+06	1.99358e+06	2.82347e+06	1.96636e+06
O35737	Heterogeneous nuclear ribonucleoprotein H	Hnrnph1	21	4	0.653	0.203374	1.09003e+06	688591	1.46288e+06	711397	737944	625307
P12970	60S ribosomal protein L7a	Rpl7a	33	7	0.653	0.456493	1.0136e+06	462032	927078	604963	627215	578138
Q9DBG3	AP-2 complex subunit beta	Ap2b1	19	4	0.652	0.347638	1.00583e+06	556472	885526	576951	840998	454637
Q8VEK3	Heterogeneous nuclear ribonucleoprotein U	Hnrnpu	76	11	0.647	0.450674	2.69463e+06	1.49842e+06	2.74034e+06	1.70067e+06	2.12594e+06	1.74353e+06
Q9CQV8	14-3-3 protein beta/alpha	Ywhab	56	2	0.645	0.538648	550437	297406	499541	293709	514013	321982
P28652	Calcium/calmodulin-dependent protein kinase type II subunit beta	Camk2b	24	3	0.644	0.754267	698850	356634	733487	424879	715799	450171
Q8QZT1	Acetyl-CoA acetyltransferase, mitochondrial	Acat1	50	9	0.644	0.542319	2.06611e+06	757025	1.32703e+06	854446	1.50482e+06	789841
Q9Z0E0	Neurochondrin	Ncdn	8	2	0.642	0.406252	299268	78734.4	174092	111750	143231	72658.1
P80315	T-complex protein 1 subunit delta	Cct4	34	7	0.641	0.389602	1.56774e+06	689757	1.17406e+06	752571	1.03193e+06	730599
Q9D8N0	Elongation factor 1-gamma	Eef1g	28	7	0.641	0.640521	1.5306e+06	820500	1.70133e+06	917700	1.54803e+06	980358
P60335	Poly(rC)-binding protein 1	Pcbp1	39	4	0.635	0.284702	1.16612e+06	648765	1.59323e+06	815799	740615	640542
Q9DBJ1	Phosphoglycerate mutase 1	Pgam1	18	4	0.635	0.321919	1.16805e+06	514211	1.07437e+06	682237	775153	387763
Q9CZ13	Cytochrome b-c1 complex subunit 1, mitochondrial	Uqcrc1	23	4	0.635	0.606249	605393	276148	638260	289195	550238	384369
Q8C0M9	Isoaspartyl peptidase/L-asparaginase	Asrgl1	17	4	0.634	0.288362	172022	300957	571584	190778	160168	220096
P61079	Ubiquitin-conjugating enzyme E2 D3	Ube2d3	13	2	0.632	0.110418	231514	184325	354459	195367	146294	115847
Q8VEM8	Phosphate carrier protein, mitochondrial	Slc25a3	17	4	0.631	0.100898	1.15669e+06	789918	1.24616e+06	729431	846102	555658
P47757	F-actin-capping protein subunit beta	Capzb	12	3	0.629	0.238995	877005	536554	2.26791e+06	370921	551364	655918
Q9R0Q7	Prostaglandin E synthase 3	Ptges3	6	2	0.629	0.774597	202688	189396	69680	119059	170240	91558
P67778	Prohibitin 1	Phb1	6	2	0.629	0.271369	215644	103487	667709	158480	135542	57168.4
P08113	Endoplasmin	Hsp90b1	21	2	0.628	0.3274	186271	106114	210969	117047	140492	112261
P68254	14-3-3 protein theta	Ywhaq	60	4	0.628	0.528444	797797	349127	936778	357108	684919	500665
Q8BGQ7	Alanine--tRNA ligase, cytoplasmic	Aars1	3	2	0.627	0.668289	219166	86130.7	194867	122255	165913	115154
Q6ZWX6	Eukaryotic translation initiation factor 2 subunit 1	Eif2s1	8	3	0.627	0.350455	307172	162780	363111	251960	192710	145674
Q60930	Voltage-dependent anion-selective channel protein 2	Vdac2	49	6	0.622	0.0879432	4.4711e+06	3.46441e+06	6.40246e+06	3.48742e+06	2.78129e+06	1.95246e+06
P35980	60S ribosomal protein L18	Rpl18	17	3	0.606	0.326331	475735	199186	423581	256782	320668	144400
P14873	Microtubule-associated protein 1B	Map1b	94	20	0.604	0.101275	7.12885e+06	6.45176e+06	8.6957e+06	3.69831e+06	6.53706e+06	4.30822e+06
Q6ZWN5	40S ribosomal protein S9	Rps9	21	4	0.602	0.621361	1.84227e+06	717416	2.36444e+06	1.109e+06	1.41033e+06	1.05543e+06
O88844	Isocitrate dehydrogenase	Idh1	15	3	0.6	0.242999	811379	518965	795463	442059	693898	477004
Q61316	Heat shock 70 kDa protein 4	Hspa4	18	7	0.598	0.210989	1.16229e+06	694124	1.63518e+06	645629	768186	695620
P52480	Pyruvate kinase PKM	Pkm	153	18	0.598	0.445174	7.68489e+06	4.02584e+06	1.14862e+07	4.59529e+06	7.22019e+06	4.32332e+06
P38647	Stress-70 protein, mitochondrial	Hspa9	12	3	0.597	0.094906	508087	384723	762173	397723	215102	303255
O35643	AP-1 complex subunit beta-1	Ap1b1	12	2	0.597	0.239284	224294	140647	217093	128628	184357	129526
P50396	Rab GDP dissociation inhibitor alpha	Gdi1	79	5	0.597	0.201789	4.26197e+06	2.60069e+06	4.44531e+06	2.40064e+06	3.1415e+06	2.54285e+06
P14869	60S acidic ribosomal protein P0	Rplp0	21	5	0.593	0.275053	725922	357055	1.04183e+06	430642	525641	285490
Q8VCM7	Fibrinogen gamma chain	Fgg	192	20	0.583	0.406706	2.98978e+07	2.58538e+07	2.02367e+07	1.75482e+06	1.50816e+07	3.57861e+07
P16546	Spectrin alpha chain, non-erythrocytic 1	Sptan1	45	13	0.583	0.364023	1.67903e+06	1.02845e+06	1.61513e+06	835610	1.6089e+06	940851
Q9D1G1	Ras-related protein Rab-1B	Rab1b	9	2	0.581	0.196904	666215	443595	1.5533e+06	530067	387367	286393
P11499	Heat shock protein HSP 90-beta	Hsp90ab1	205	12	0.581	0.430263	1.60965e+07	8.07309e+06	1.78607e+07	9.34942e+06	1.28272e+07	9.11493e+06
P62996	Transformer-2 protein homolog beta	Tra2b	3	2	0.581	0.263263	219523	126680	72171	110442	73543	52965.6
Q8R081	Heterogeneous nuclear ribonucleoprotein L	Hnrnpl	14	3	0.569	0.324192	822727	516970	816949	151615	766209	464947
Q9D0K2	Succinyl-CoA:3-ketoacid coenzyme A transferase 1, mitochondrial	Oxct1	4	2	0.569	0.788548	71127.5	32951.3	78320.2	38123.8	85880.8	40479.5
P16858	Glyceraldehyde-3-phosphate dehydrogenase	Gapdh	196	15	0.558	0.341063	2.47663e+07	1.32404e+07	2.91886e+07	1.36853e+07	2.01533e+07	1.38214e+07
Q76MZ3	Serine/threonine-protein phosphatase 2A 65 kDa regulatory subunit A alpha isoform	Ppp2r1a	19	7	0.558	0.53507	679417	247160	557077	270529	520493	310778
Q8BG05	Heterogeneous nuclear ribonucleoprotein A3	Hnrnpa3	34	5	0.55	0.535228	1.7824e+06	710557	1.91986e+06	516545	981046	1.79996e+06
Q8K4L4	Protein POF1B	Pof1b	3	2	0.548	0.298853	47632.7	69764.1	1.5421e+06	43760.4	38247.2	31127.9
Q61990	Poly(rC)-binding protein 2	Pcbp2	35	2	0.542	0.601408	807508	278031	931032	405318	577069	437432
P50516	V-type proton ATPase catalytic subunit A	Atp6v1a	37	8	0.534	0.184503	1.72674e+06	965583	3.66688e+06	921838	1.04412e+06	675047
P61750	ADP-ribosylation factor 4	Arf4	35	2	0.532	0.12852	661492	397962	745774	474933	284603	352051
P49722	Proteasome subunit alpha type-2	Psma2	8	3	0.529	0.175582	216436	159789	793094	114580	134802	90630.4
Q61768	Kinesin-1 heavy chain	Kif5b	5	3	0.528	0.173976	238930	159441	313566	114714	212197	126144
P01837	Immunoglobulin kappa constant	Igkc	17	2	0.528	0.702867	619466	495172	58030.5	1.06395e+06	261396	199476
Q9JIF0	Protein arginine N-methyltransferase 1	Prmt1	11	2	0.527	0.216357	199604	118113	324706	105259	173552	81843.4
Q61879	Myosin-10	Myh10	19	6	0.527	0.0378334	159877	114767	166506	109491	84256.3	76593.9
Q9QZD9	Eukaryotic translation initiation factor 3 subunit I	Eif3i	6	2	0.523	0.358742	74087.7	52265.2	54669.5	79833.3	28571	25664.2
P97797	Tyrosine-protein phosphatase non-receptor type substrate 1	Sirpa	7	3	0.514	0.732616	87236.6	108910	14304.4	18079.2	71865.7	44882.5
P60843	Eukaryotic initiation factor 4A-I	Eif4a1	80	6	0.513	0.214449	4.52564e+06	2.04698e+06	8.61829e+06	2.32495e+06	2.32237e+06	1.63918e+06
P58252	Elongation factor 2	Eef2	115	19	0.505	0.427901	8.96509e+06	3.14203e+06	8.40856e+06	6.13952e+06	4.24961e+06	3.1339e+06
Q9DB77	Cytochrome b-c1 complex subunit 2, mitochondrial	Uqcrc2	4	2	0.501	0.30176	130415	36586.6	75050.7	37602.7	59086.8	34900.9
Q01853	Transitional endoplasmic reticulum ATPase	Vcp	69	15	0.496	0.388386	2.61706e+06	1.03146e+06	3.72756e+06	1.20069e+06	1.82041e+06	1.29775e+06
P51660	Peroxisomal multifunctional enzyme type 2	Hsd17b4	9	4	0.491	0.170919	415894	219393	758547	207361	175448	204309
P12658	Calbindin	Calb1	9	2	0.489	0.135856	486354	532635	549490	260281	417734	146187
P35279	Ras-related protein Rab-6A	Rab6a	13	2	0.486	0.0460175	598860	400186	669953	290908	367916	269547
P43277	Histone H1.3	H1-3	76	3	0.485	0.206936	1.31288e+07	2.69334e+07	1.75463e+07	1.86876e+07	8.39653e+06	8.50929e+06
P59999	Actin-related protein 2/3 complex subunit 4	Arpc4	18	4	0.475	0.0786895	504812	334640	925600	239574	311169	130544
Q8K2B3	Succinate dehydrogenase	Sdha	17	6	0.47	0.273252	1.30507e+06	587008	1.32478e+06	612764	839950	593780
Q11011	Puromycin-sensitive aminopeptidase	Npepps	8	4	0.462	0.281871	243583	86009.8	408213	91287.7	112577	112832
Q9CVB6	Actin-related protein 2/3 complex subunit 2	Arpc2	15	5	0.46	0.320014	693168	256106	2.32003e+06	318988	388638	272237
P43274	Histone H1.4	H1-4	83	2	0.449	0.136506	2.02621e+06	4.34698e+06	2.78893e+06	2.55864e+06	1.25255e+06	1.23238e+06
P62880	Guanine nucleotide-binding protein G(I)/G(S)/G(T) subunit beta-2	Gnb2	37	3	0.449	0.719519	485521	238897	29444	174039	62368.2	107243
P35293	Ras-related protein Rab-18	Rab18	11	3	0.441	0.0335886	208745	156393	298863	84293.6	113189	92104.1
P43276	Histone H1.5	H1-5	53	6	0.439	0.272079	3.91949e+06	6.54797e+06	2.63638e+06	4.78936e+06	986746	1.72142e+06
Q9JHU4	Cytoplasmic dynein 1 heavy chain 1	Dync1h1	40	17	0.434	0.660467	2.58946e+06	1.11603e+06	2.17338e+06	944234	6.39157e+07	915882
P14602	Heat shock protein beta-1	Hspb1	4	2	0.42	0.255151	38520	41123.5	1.66535e+06	29779.9	17272	14602.2
P61358	60S ribosomal protein L27	Rpl27	14	3	0.42	0.609775	865714	208053	854312	528140	342083	358399
Q8VDM4	26S proteasome non-ATPase regulatory subunit 2	Psmd2	9	3	0.397	0.143175	377362	221053	402979	295832	128579	149725
Q9CR57	60S ribosomal protein L14	Rpl14	15	3	0.382	0.294736	70275.5	135354	171471	143655	24971	51686.3
P62814	V-type proton ATPase subunit B, brain isoform	Atp6v1b2	5	2	0.374	0.167135	190682	84979.6	464835	71373.8	82949.7	58585.7
P68368	Tubulin alpha-4A chain	Tuba4a	528	5	0.352	0.0705077	5.51214e+06	3.44517e+06	5.82473e+06	3.12245e+06	1.94078e+06	1.09204e+06
O54734	Dolichyl-diphosphooligosaccharide--protein glycosyltransferase 48 kDa subunit	Ddost	3	2	0.336	0.213462	219760	111102	608428	188183	73758.7	73022.3
Q61176	Arginase-1	Arg1	9	3	0.315	0.405983	709755	257090	7.66203e+06	213395	1.09185e+06	223623
Q9QYG0	Protein NDRG2	Ndrg2	9	2	0.313	0.0866649	207403	203649	434794	161159	31213.6	64971.4
Q9WU78	Programmed cell death 6-interacting protein	Pdcd6ip	3	2	0.266	0.195812	59499.1	26229.3	246998	13731	44174.3	15855.8
P61089	Ubiquitin-conjugating enzyme E2 N	Ube2n	3	2	0.208	0.0115956	148731	109478	228440	60360.9	28708.9	30965.6
Q8CAY6	Acetyl-CoA acetyltransferase, cytosolic	Acat2	8	2	0.18	0.0614959	115668	64354.1	315848	16170.4	59296.5	20803.7

## Sheet: S5-6. P13, all
UniProt ID	Protein	Gene	# PSMs	# unique peptides	Median fold change: PhoxID with compound 1 vs. 2	Fold change p-value	Abundances (Grouped): Compound 2, Bio. Rep. 1	Abundances (Grouped): Compound 2, Bio. Rep. 2	Abundances (Grouped): Compound 2, Bio. Rep. 3	Abundances (Grouped): Compound 1, Bio. Rep. 1	Abundances (Grouped): Compound 1, Bio. Rep. 2	Abundances (Grouped): Compound 1, Bio. Rep. 3
Q9CQM9	Glutaredoxin-3	Glrx3	5	2	18.775	0.0228592	11387.6	42375.6	12566.1	204042	235933	270939
Q9Z2W8	Glutamate receptor 4	Gria4	188	19	16.509	2.95073e-05	771542	626187	573771	1.20498e+07	9.73341e+06	1.03375e+07
O88998	Noelin	Olfm1	35	5	14.05	7.05804e-05	130950	113833	118020	1.79464e+06	1.38185e+06	1.65817e+06
Q68EF4	Metabotropic glutamate receptor 4	Grm4	22	6	12.773	5.79584e-05	66603.8	52572.4	51034.3	705346	671518	514362
P26883	Peptidyl-prolyl cis-trans isomerase FKBP1A	Fkbp1a	15	2	11.698	0.141954	38732.5	325217	21207.7	461643	452325	453092
Q61625	Glutamate receptor ionotropic, delta-2	Grid2	175	25	11.101	0.00023839	1.3856e+06	1.06518e+06	1.0311e+06	1.31185e+07	1.18242e+07	1.12345e+07
Q9Z2W9	Glutamate receptor 3	Gria3	119	17	10.791	6.13089e-05	500236	363477	390540	5.1571e+06	4.21418e+06	3.98283e+06
Q9CPW0	Contactin-associated protein-like 2	Cntnap2	135	28	10.396	4.78494e-05	918715	707088	751688	7.81472e+06	7.99412e+06	6.6977e+06
P23819	Glutamate receptor 2	Gria2	86	15	10.311	0.000183472	631453	449407	528673	6.21034e+06	5.45125e+06	5.17229e+06
Q9JLB9	Nectin-3	Nectin3	15	3	9.293	0.000493008	50200.7	33979.3	31087.6	355451	315767	233865
P09055	Integrin beta-1	Itgb1	63	16	9.177	0.00050717	648858	397155	461265	4.23307e+06	4.42802e+06	3.12468e+06
Q69ZK9	Neuroligin-2	Nlgn2	32	7	9.055	0.00170024	232953	120156	155333	1.57681e+06	1.40661e+06	850978
Q8BYI9	Tenascin-R	Tnr	228	30	8.234	0.000988124	1.58692e+06	2.07067e+06	1.11735e+06	1.58554e+07	1.30659e+07	9.93288e+06
P0C192	Leucine-rich repeat-containing protein 4B	Lrrc4b	13	4	8.108	0.00135466	44672.8	24698.3	28844.9	233868	279094	183251
Q810U4	Neuronal cell adhesion molecule	Nrcam	179	24	7.818	0.00203839	2.19861e+06	1.21578e+06	1.33328e+06	1.11115e+07	1.0423e+07	7.44065e+06
P61164	Alpha-centractin	Actr1a	18	3	7.806	0.227014	28972.5	239803	31393.2	320081	245043	96190.8
Q9Z218	Dipeptidyl aminopeptidase-like protein 6	Dpp6	126	17	7.767	0.0125677	1.51756e+06	1.23077e+06	941513	9.55946e+06	1.15261e+07	4.36499e+06
Q8R2Y2	Cell surface glycoprotein MUC18	Mcam	39	12	7.647	0.00102206	255695	214620	194113	1.734e+06	1.64113e+06	1.10799e+06
P02468	Laminin subunit gamma-1	Lamc1	110	24	7.575	9.17401e-05	616849	461845	540776	4.0965e+06	4.29548e+06	3.5407e+06
Q6PHS9	Voltage-dependent calcium channel subunit alpha-2/delta-2	Cacna2d2	84	19	7.571	0.00140665	413421	395328	407153	3.13466e+06	3.08262e+06	2.42943e+06
Q9QZF2	Glypican-1	Gpc1	8	6	7.548	0.0202084	103805	46294.7	45545	351206	349454	289472
Q05793	Basement membrane-specific heparan sulfate proteoglycan core protein	Hspg2	278	51	7.004	0.00575182	2.02419e+06	1.34367e+06	1.29008e+06	9.1197e+06	9.41095e+06	9.61055e+06
P97772	Metabotropic glutamate receptor 1	Grm1	50	14	6.9	0.017293	717409	344362	369042	2.64016e+06	2.54634e+06	2.53013e+06
Q9JHG0	Cerebellin-3	Cbln3	17	3	6.818	0.000606508	115308	122219	84279.6	862915	786116	702632
P02469	Laminin subunit beta-1	Lamb1	64	19	6.783	0.000704923	226903	215752	155720	1.57823e+06	1.46351e+06	1.28934e+06
Q62443	Neuronal pentraxin-1	Nptx1	31	11	6.645	0.00124955	255867	151824	229077	1.72516e+06	987573	1.52211e+06
A2ASQ1	Agrin	Agrn	92	22	6.622	0.000505876	398799	297332	385212	2.55098e+06	2.59409e+06	1.75375e+06
O88322	Nidogen-2	Nid2	126	21	6.506	0.00658843	691248	475113	384487	2.8447e+06	3.09121e+06	3.25663e+06
Q9WV18	Gamma-aminobutyric acid type B receptor subunit 1	Gabbr1	9	4	6.473	0.159437	37718.2	26326	29670.8	192047	193818	33901.6
Q9JIF0	Protein arginine N-methyltransferase 1	Prmt1	21	4	6.426	0.0253705	50633.3	18608.9	25375.2	138149	163073	168136
O35874	Neutral amino acid transporter A	Slc1a4	11	3	6.387	0.00559187	22795.6	27726.9	15818	160367	145605	145522
P70232	Neural cell adhesion molecule L1-like protein	Chl1	145	20	6.327	0.00141189	774848	719493	459845	4.55203e+06	4.66336e+06	3.40305e+06
P97798	Neogenin	Neo1	82	19	6.286	0.00196653	547931	382196	326825	2.60299e+06	2.40243e+06	1.97538e+06
P97797	Tyrosine-protein phosphatase non-receptor type substrate 1	Sirpa	46	7	6.104	0.000239977	270308	310892	235181	1.6812e+06	1.65001e+06	1.23301e+06
Q99P47	Contactin-associated protein-like 4	Cntnap4	11	5	6.087	0.0151916	30540.6	38474.5	14935.4	185898	189885	143663
P97927	Laminin subunit alpha-4	Lama4	27	8	6.076	0.00122895	145117	160806	198886	1.25408e+06	977126	752293
Q61292	Laminin subunit beta-2	Lamb2	168	33	6.069	2.80693e-05	865381	696468	788999	4.67154e+06	5.62737e+06	4.78812e+06
P55066	Neurocan core protein	Ncan	50	13	6.03	5.4545e-05	436737	366369	361237	2.43168e+06	2.20927e+06	2.12076e+06
Q80YX1	Tenascin	Tnc	366	46	5.966	8.29861e-05	3.61279e+06	3.07494e+06	2.92702e+06	1.83449e+07	1.91296e+07	1.67365e+07
Q8BGN3	Glycerophosphocholine cholinephosphodiesterase ENPP6	Enpp6	18	4	5.942	0.0491255	124323	64511.4	75039.4	718567	445861	175167
P02463	Collagen alpha-1(IV) chain	Col4a1	25	5	5.904	0.00216317	160433	143029	117398	854944	818030	844376
P35438	Glutamate receptor ionotropic, NMDA 1	Grin1	7	4	5.713	0.000292635	63234.2	65118.7	76797.1	367135	397185	371994
P23818	Glutamate receptor 1	Gria1	60	12	5.662	0.00488545	393519	256963	316339	1.76334e+06	1.79115e+06	1.81184e+06
B9EKR1	Receptor-type tyrosine-protein phosphatase zeta	Ptprz1	109	13	5.658	0.0139692	1.50264e+06	1.46059e+06	640137	9.57712e+06	8.26424e+06	7.38745e+06
Q810U3	Neurofascin	Nfasc	169	26	5.626	0.000437029	1.90022e+06	1.55556e+06	1.28926e+06	9.14643e+06	8.75209e+06	6.97279e+06
Q62059	Versican core protein	Vcan	48	12	5.581	0.000140087	357033	278483	302057	1.81239e+06	1.68584e+06	1.54629e+06
Q8R464	Cell adhesion molecule 4	Cadm4	134	12	5.567	0.00320833	1.56078e+06	1.09423e+06	868559	6.09153e+06	6.41395e+06	4.72519e+06
Q80Z24	Neuronal growth regulator 1	Negr1	23	4	5.55	0.057301	141510	50391.9	40537.2	317096	279691	198030
Q5F226	Protocadherin Fat 2	Fat2	420	76	5.51	0.00125617	4.10456e+06	3.22933e+06	2.79357e+06	2.05375e+07	1.77927e+07	1.76921e+07
Q80TS3	Adhesion G protein-coupled receptor L3	Adgrl3	15	8	5.496	5.79752e-06	64226.5	62090.9	60663.5	341253	349164	318974
P15116	Cadherin-2	Cdh2	39	8	5.364	0.0289988	282703	705659	299564	1.7998e+06	1.60698e+06	1.11274e+06
P56528	ADP-ribosyl cyclase/cyclic ADP-ribose hydrolase 1	Cd38	5	2	5.36	0.0435447	27320.5	10846.2	23727.7	180102	127190	41897.8
Q6NXK7	Inactive dipeptidyl peptidase 10	Dpp10	36	8	5.317	0.00118428	259115	221729	164875	1.2926e+06	1.17894e+06	808096
Q7TNR6	Immunoglobulin superfamily member 21	Igsf21	23	6	5.314	0.0130724	210524	96815.7	99210.9	760334	527175	510238
O88507	Ciliary neurotrophic factor receptor subunit alpha	Cntfr	89	9	5.294	0.00133382	1.00929e+06	824500	605179	4.77719e+06	4.3646e+06	3.35998e+06
Q9JIA1	Leucine-rich glioma-inactivated protein 1	Lgi1	17	6	5.259	0.000461529	93046.5	128675	130388	676752	686861	545646
Q3V3R4	Integrin alpha-1	Itga1	11	4	5.012	0.000753426	58167	47872.7	70397	336145	291529	220344
P10493	Nidogen-1	Nid1	239	32	4.992	0.0020097	3.21625e+06	2.48726e+06	2.06891e+06	1.23371e+07	1.2417e+07	1.46505e+07
O54991	Contactin-associated protein 1	Cntnap1	64	16	4.979	0.000476713	442551	425438	328119	2.27777e+06	2.11824e+06	1.90811e+06
Q78PY7	Staphylococcal nuclease domain-containing protein 1	Snd1	9	5	4.976	0.482238	20708.1	79277.2	27868	138661	14963.9	190985
P08122	Collagen alpha-2(IV) chain	Col4a2	17	4	4.958	0.018735	296823	212916	116645	1.05564e+06	1.09419e+06	813154
Q9R1V6	Disintegrin and metalloproteinase domain-containing protein 22	Adam22	15	5	4.936	0.00142085	75100.8	103653	98218.1	500503	484799	443082
Q8CJH3	Plexin-B1	Plxnb1	42	10	4.894	0.0102926	304081	214371	174743	1.04916e+06	1.08936e+06	1.04167e+06
Q9CS84	Neurexin-1	Nrxn1	32	10	4.887	0.00131551	229015	196391	186555	1.21096e+06	959680	803761
P16390	Potassium voltage-gated channel subfamily A member 3	Kcna3	8	2	4.842	0.000202526	20985.3	27635.4	23979.1	116118	125577	104624
Q9QYS2	Metabotropic glutamate receptor 3	Grm3	43	9	4.831	0.00278259	389649	265499	226777	1.28273e+06	1.61281e+06	1.17837e+06
Q8BLK3	Limbic system-associated membrane protein	Lsamp	50	7	4.778	0.00227333	822082	542672	532907	2.59279e+06	2.72321e+06	1.99919e+06
P10852	4F2 cell-surface antigen heavy chain	Slc3a2	113	14	4.647	0.000116391	1.50114e+06	1.40246e+06	1.2215e+06	6.51685e+06	6.59533e+06	5.27337e+06
Q8JZS0	Protein lin-7 homolog A	Lin7a	6	3	4.629	0.0207753	49470	20058	40322.1	176974	213028	186668
Q9D3A9	Protein tweety homolog 1	Ttyh1	9	3	4.628	0.0578468	30745.5	103780	42365.7	235013	196055	178136
O35136	Neural cell adhesion molecule 2	Ncam2	75	16	4.494	0.0176342	905639	878901	363632	3.94958e+06	4.02984e+06	2.64201e+06
P39061	Collagen alpha-1(XVIII) chain	Col18a1	15	4	4.481	0.00173277	69670.7	63986.1	62887.4	286744	250890	346089
Q9D1T0	Leucine-rich repeat and immunoglobulin-like domain-containing nogo receptor-interacting protein 1	Lingo1	18	3	4.371	0.0049492	58446.3	79078.9	70099.6	306430	405600	222173
Q8BKG3	Inactive tyrosine-protein kinase 7	Ptk7	35	7	4.266	0.001156	65023.6	100146	94150.1	401677	471801	337713
Q9R1V7	Disintegrin and metalloproteinase domain-containing protein 23	Adam23	29	6	4.193	0.00446859	116178	73440.8	88222.8	606515	369885	319282
P12960	Contactin-1	Cntn1	606	40	4.154	0.00167685	1.17005e+07	9.76414e+06	7.58982e+06	4.05617e+07	4.17861e+07	3.27715e+07
Q9R171	Cerebellin-1	Cbln1	58	6	4.141	0.0029435	415580	236533	336784	1.63062e+06	1.39469e+06	1.07331e+06
Q8BFY9	Transportin-1	Tnpo1	9	2	4.132	0.243647	8916.55	77176.5	25844.9	106789	143548	30129.1
Q61490	CD166 antigen	Alcam	17	5	4.055	0.0191251	23804.5	22002.4	35694.7	138115	96527.4	58772.9
O35206	Collagen alpha-1(XV) chain	Col15a1	7	3	3.974	0.0702833	121129	38916.3	50804.2	225964	201916	187873
Q60675	Laminin subunit alpha-2	Lama2	46	18	3.937	2.18989e-05	329871	312240	289155	1.24316e+06	1.22922e+06	1.14139e+06
P18572	Basigin	Bsg	18	4	3.873	0.0131319	404278	240847	238668	1.07484e+06	888694	932797
E9Q7X7	Neurexin-2	Nrxn2	15	6	3.867	0.00276683	94152	106302	69677.5	364114	418358	251903
P62334	26S proteasome regulatory subunit 10B	Psmc6	6	3	3.842	0.00283778	18421.6	26242.9	28324	100815	115217	93731.9
O88343	Electrogenic sodium bicarbonate cotransporter 1	Slc4a4	148	14	3.823	0.00215072	2.40207e+06	1.79397e+06	1.57408e+06	7.95427e+06	6.85907e+06	5.19107e+06
Q8K406	Leucine-rich repeat LGI family member 3	Lgi3	17	5	3.816	0.0638105	33547.2	7981.98	33996.8	128013	130673	92056
Q8BYM5	Neuroligin-3	Nlgn3	33	6	3.796	0.00283174	221319	149277	219129	831897	907769	743871
Q6ZQA6	Immunoglobulin superfamily member 3	Igsf3	72	18	3.788	0.00328626	347933	301229	248168	1.14115e+06	1.21622e+06	1.11862e+06
Q63912	Oligodendrocyte-myelin glycoprotein	Omg	7	2	3.761	0.129229	28112.6	17972.3	33596.1	172822	105729	32143.9
Q61330	Contactin-2	Cntn2	190	23	3.746	0.00833277	2.59086e+06	1.87569e+06	1.53869e+06	6.55372e+06	7.02659e+06	7.77159e+06
Q9Z1S5	Neuronal-specific septin-3	Septin3	11	2	3.48	0.0639419	435524	152071	216285	786975	752608	505663
Q8R366	Immunoglobulin superfamily member 8	Igsf8	43	9	3.465	0.0182249	422592	307995	218786	1.07961e+06	1.06707e+06	918654
Q80UG2	Plexin-A4	Plxna4	9	3	3.459	0.186894	34524.4	14664.9	22788.3	78832.9	99106	21978.5
Q64487	Receptor-type tyrosine-protein phosphatase delta	Ptprd	26	8	3.456	0.00257961	164749	109195	162097	586445	560180	387687
P13595	Neural cell adhesion molecule 1	Ncam1	416	28	3.432	0.0184722	1.4966e+07	1.10879e+07	7.06577e+06	3.8056e+07	3.99489e+07	2.96206e+07
B2RXS4	Plexin-B2	Plxnb2	68	11	3.428	0.0101359	448136	468023	271267	1.53638e+06	1.62817e+06	1.33857e+06
P19137	Laminin subunit alpha-1	Lama1	20	9	3.423	0.0129371	122836	231790	173624	594312	643330	506442
O70318	Band 4.1-like protein 2	Epb41l2	8	2	3.421	0.0221432	63769.3	32509	43844.4	146491	149999	162473
P01831	Thy-1 membrane glycoprotein	Thy1	25	4	3.416	0.00145309	669546	565842	587437	2.28644e+06	2.0068e+06	1.65198e+06
Q925N0	Sideroflexin-5	Sfxn5	18	5	3.399	0.23719	101162	336600	66694.2	361940	343867	199299
Q8JZQ9	Eukaryotic translation initiation factor 3 subunit B	Eif3b	8	4	3.337	0.00354737	15168.8	17425.8	24763.4	58144.1	53404.6	82358.1
P54763	Ephrin type-B receptor 2	Ephb2	3	2	3.324	0.0267029	20312.6	40616	28010.4	92731.7	93107.1	96034.2
P70663	SPARC-like protein 1	Sparcl1	31	8	3.281	0.0114008	442934	227136	344648	1.29309e+06	1.13079e+06	748917
Q9D023	Mitochondrial pyruvate carrier 2	Mpc2	25	3	3.248	0.0497068	148757	324177	171384	530542	586109	556687
Q71M36	Chondroitin sulfate proteoglycan 5	Cspg5	23	4	3.223	0.132632	433822	207806	57877.6	611811	898115	669683
Q8BY89	Choline transporter-like protein 2	Slc44a2	8	4	3.175	0.00588184	64781.8	43328.2	40749.6	165874	137586	111602
Q61001	Laminin subunit alpha-5	Lama5	21	4	3.155	0.0118812	34077.9	30886.8	18290.3	88727.9	115274	97440.3
Q99PJ0	Neurotrimin	Ntm	112	11	3.137	0.0013549	2.45967e+06	2.06379e+06	1.87499e+06	6.47492e+06	6.8423e+06	6.00645e+06
Q80T41	Gamma-aminobutyric acid type B receptor subunit 2	Gabbr2	13	5	3.065	0.00115911	35271.2	28916.2	26725.7	99768.8	88633.1	86358.4
Q01149	Collagen alpha-2(I) chain	Col1a2	14	2	3.048	0.0286613	107076	85295	44482.1	286217	176833	259982
P51660	Peroxisomal multifunctional enzyme type 2	Hsd17b4	27	8	3.041	0.135282	148969	428361	155699	473472	392925	588819
Q9CPP6	NADH dehydrogenase	Ndufa5	6	2	3.009	0.441115	36284.6	91641.5	41446.9	157539	124693	31914.7
Q9EP69	Phosphatidylinositol-3-phosphatase SAC1	Sacm1l	3	2	2.975	0.0232666	25146	26058.5	38553.1	77530.9	57358.3	121683
P97370	Sodium/potassium-transporting ATPase subunit beta-3	Atp1b3	71	7	2.964	0.0672505	1.73836e+06	627003	991460	3.13472e+06	2.93833e+06	2.92167e+06
Q6GQU6	Leucine-rich repeat and immunoglobulin-like domain-containing nogo receptor-interacting protein 3	Lingo3	19	6	2.954	0.0460402	53347.7	69438.4	113819	205477	197056	205102
Q9WVJ2	26S proteasome non-ATPase regulatory subunit 13	Psmd13	7	2	2.946	0.0972174	36837.4	89614.2	35422.5	108523	98112.8	137097
P43275	Histone H1.1	H1-1	45	2	2.941	0.0397856	302867	278077	537094	581225	890722	1.12496e+06
P97300	Neuroplastin	Nptn	27	5	2.905	0.000676732	450394	384625	357840	1.11752e+06	1.16341e+06	911095
Q91ZX7	Prolow-density lipoprotein receptor-related protein 1	Lrp1	207	40	2.889	0.0209953	2.1841e+06	1.77217e+06	1.23318e+06	5.2942e+06	5.10221e+06	5.11956e+06
Q99J99	3-mercaptopyruvate sulfurtransferase	Mpst	4	2	2.88	0.0215198	15503.6	16793.2	25557.1	51121.7	45129.7	48364.8
Q9D0I9	Arginine--tRNA ligase, cytoplasmic	Rars1	3	3	2.877	0.0045468	34384.9	46189.9	30005.9	81735	98938.2	112097
Q9WTR5	Cadherin-13	Cdh13	15	3	2.87	0.137301	71231.5	59917.3	58449	171990	350178	82235.5
Q9Z127	Large neutral amino acids transporter small subunit 1	Slc7a5	13	2	2.861	0.00154174	97286	111515	77755.1	242028	278314	329897
Q3UH99	Protein shisa-6	Shisa6	11	3	2.852	0.0328089	36505.8	44818.8	59566.9	184427	127821	80856.3
Q8VCM7	Fibrinogen gamma chain	Fgg	279	20	2.814	0.348553	2.9861e+07	3.4303e+06	5.34748e+06	9.26635e+06	1.50468e+07	6.62297e+07
P28571	Sodium- and chloride-dependent glycine transporter 1	Slc6a9	34	5	2.801	0.044151	484745	414318	200767	1.202e+06	1.1607e+06	1.00823e+06
Q922P8	Transmembrane protein 132A	Tmem132a	7	3	2.801	0.0737713	34586	12419.6	43067.7	96866.4	107440	88581.3
Q9D172	Glutamine amidotransferase-like class 1 domain-containing protein 3, mitochondrial	Gatd3	17	4	2.798	0.146849	122725	178820	20838.7	343327	277672	435922
Q61301	Catenin alpha-2	Ctnna2	8	3	2.792	0.0963761	36759.1	70479.8	21195.1	101590	114251	102648
P48774	Glutathione S-transferase Mu 5	Gstm5	52	6	2.762	0.146849	224978	212836	147248	714945	209567	587936
Q8R1Q8	Cytoplasmic dynein 1 light intermediate chain 1	Dync1li1	9	4	2.748	0.314013	309194	1.44459e+06	5.44863e+06	3.42907e+06	3.96901e+06	4.90109e+06
Q99N28	Cell adhesion molecule 3	Cadm3	126	11	2.723	0.00304577	2.17029e+06	1.52988e+06	1.89161e+06	5.42239e+06	5.15174e+06	4.52534e+06
P14231	Sodium/potassium-transporting ATPase subunit beta-2	Atp1b2	128	9	2.71	0.012211	4.39022e+06	3.06971e+06	2.90898e+06	8.32036e+06	9.32565e+06	8.10811e+06
Q5DTL9	Sodium-driven chloride bicarbonate exchanger	Slc4a10	50	8	2.689	0.00309305	259229	231012	178514	647446	621303	470955
P0DP27	Calmodulin-2	Calm2	19	3	2.655	0.0972075	137727	284854	128028	408748	365710	262614
O35405	5'-3' exonuclease PLD3	Pld3	6	2	2.602	0.549931	49467.1	17000.6	13435.4	15711.7	44237.8	46289.4
Q8C129	Leucyl-cystinyl aminopeptidase	Lnpep	10	2	2.576	0.258704	23946.7	45362.4	31911.4	82610	82210.9	27844.6
P62830	60S ribosomal protein L23	Rpl23	17	2	2.525	0.0550665	147630	97688.9	110497	409176	278968	175756
Q8VHY0	Chondroitin sulfate proteoglycan 4	Cspg4	148	32	2.524	0.0325641	1.74767e+06	791547	1.60942e+06	4.0628e+06	4.91165e+06	3.63129e+06
P54071	Isocitrate dehydrogenase	Idh2	27	4	2.49	0.187109	351508	111436	145530	296341	397827	362438
P51410	60S ribosomal protein L9	Rpl9	39	4	2.475	0.118812	1.36223e+06	608683	663034	1.47736e+06	1.64068e+06	1.66114e+06
Q9WTS4	Teneurin-1	Tenm1	4	3	2.469	0.026457	43015.8	22912.9	37768	93259	102845	86506.1
Q8BP47	Asparagine--tRNA ligase, cytoplasmic	NARS1	13	3	2.462	0.0262692	86034.3	69593.6	38243.3	169684	171329	241375
Q9WUT3	Ribosomal protein S6 kinase alpha-2	Rps6ka2	4	2	2.399	0.0859816	158715	106907	59060.3	257707	256508	192315
P11627	Neural cell adhesion molecule L1	L1cam	183	20	2.395	0.011947	4.13579e+06	3.97497e+06	2.84494e+06	9.51832e+06	9.88379e+06	9.07075e+06
Q8BWF0	Succinate-semialdehyde dehydrogenase, mitochondrial	Aldh5a1	21	6	2.393	0.108214	175362	329236	66713.6	785393	415809	419637
Q9JJK2	LanC-like protein 2	Lancl2	9	3	2.369	0.240939	228700	60687.9	79287.1	187814	153243	276127
E9PVD3	Protocadherin-16	Dchs1	27	13	2.367	0.000753981	179698	188463	155362	482749	425364	377115
Q91V41	Ras-related protein Rab-14	Rab14	42	6	2.341	0.00832125	731271	627937	501124	1.39668e+06	1.46995e+06	1.60514e+06
Q9Z1L5	Voltage-dependent calcium channel subunit alpha-2/delta-3	Cacna2d3	9	3	2.319	0.000859619	29200.9	36637	31460.8	68493.7	72956.9	85821.7
Q9CQ54	NADH dehydrogenase	Ndufc2	7	2	2.302	0.0483938	35800.9	92899.7	78585.2	144497	180871	245274
Q8BLQ9	Cell adhesion molecule 2	Cadm2	14	5	2.293	0.167424	324831	84925.3	170606	391124	423573	320865
Q8K0U4	Heat shock 70 kDa protein 12A	Hspa12a	13	4	2.29	0.0404819	154430	111005	82181.6	226348	267702	254186
Q640R3	Hepatocyte cell adhesion molecule	Hepacam	4	2	2.279	0.239409	20979.1	18976.9	37743.5	56875.7	23446.6	47811.2
Q4V9Z5	Seizure 6-like protein 2	Sez6l2	4	2	2.249	0.00956019	53436.5	34320.1	46418.2	104378	118345	93360.9
Q61361	Brevican core protein	Bcan	41	9	2.244	0.0182701	350655	390168	318142	1.28505e+06	783850	786878
Q7TQF7	Amphiphysin	Amph	6	3	2.237	0.512593	35928.8	39413.6	95385	113421	36623.2	88172.8
P46935	E3 ubiquitin-protein ligase NEDD4	Nedd4	3	2	2.218	0.0712682	28441.9	10576.5	15823.1	35041.7	35088.2	55164.2
P56546	C-terminal-binding protein 2	Ctbp2	15	2	2.195	0.15054	96886.2	56610.6	25876.6	124263	129085	120847
Q9D710	Thioredoxin-related transmembrane protein 2	Tmx2	8	2	2.182	0.225959	232711	36475.9	111237	242754	238442	265735
Q5PR73	GTP-binding protein Di-Ras2	Diras2	10	2	2.158	0.167434	130955	25639.4	73317.4	158204	147757	208153
P62242	40S ribosomal protein S8	Rps8	54	7	2.153	0.0578643	859665	528009	469770	928424	1.13663e+06	1.30697e+06
O35633	Vesicular inhibitory amino acid transporter	Slc32a1	5	2	2.148	0.0220288	24293.8	43331.5	37518.5	80600.6	96914.1	75597.6
Q02053	Ubiquitin-like modifier-activating enzyme 1	Uba1	277	27	2.133	0.0186999	6.64004e+06	8.58237e+06	5.32656e+06	1.41652e+07	1.24593e+07	1.56769e+07
P55088	Aquaporin-4	Aqp4	28	4	2.109	0.0340228	1.10521e+06	732043	728534	1.67084e+06	1.54393e+06	1.34708e+06
Q64133	Amine oxidase	Maoa	10	4	2.106	0.121763	12506.6	40252.8	28486.7	75643.3	38911.7	59983.1
P52795	Ephrin-B1	Efnb1	9	2	2.093	0.0685945	22659.3	55795.5	40595.1	84953.8	73338.8	105633
Q64332	Synapsin-2	Syn2	73	8	2.071	0.0306592	1.33341e+06	981801	841018	2.02769e+06	2.03379e+06	2.20896e+06
Q80TJ1	Calcium-dependent secretion activator 1	Cadps	54	6	2.069	0.00962543	471979	506372	349276	977621	808549	976633
Q99JG2	G-protein coupled receptor 37-like 1	Gpr37l1	15	3	2.066	0.0193309	103141	77305.5	73058.6	168816	151561	159684
P59999	Actin-related protein 2/3 complex subunit 4	Arpc4	21	5	2.065	0.0795062	860882	584870	369964	1.11054e+06	1.2079e+06	1.38609e+06
Q8BFZ9	Erlin-2	Erlin2	4	2	2.044	0.0291453	27171.2	49665.1	38761.9	79247.3	76008.8	97353.5
Q8VH51	RNA-binding protein 39	Rbm39	5	3	2.035	0.133513	246895	136028	104356	276813	245913	313410
Q9DBE8	Alpha-1,3/1,6-mannosyltransferase ALG2	Alg2	2	2	2.023	0.704548	33508.8	27163.6	42865.5	67794.3	75056.6	15238.1
Q5XJY5	Coatomer subunit delta	Arcn1	5	2	2.019	0.143537	91118.1	37889.1	51713.4	111908	87347.7	104407
P61358	60S ribosomal protein L27	Rpl27	12	3	2.019	0.139178	172783	68324.4	120928	147434	244112	252957
Q99KP6	Pre-mRNA-processing factor 19	Prpf19	16	6	2.015	0.119646	335015	97778.8	197810	389695	398597	584594
Q9R0Q7	Prostaglandin E synthase 3	Ptges3	21	3	2.006	0.0373288	69922.5	119398	84261.1	169018	139613	192249
Q9CR57	60S ribosomal protein L14	Rpl14	9	2	2.005	0.405878	212933	31338.9	61231.4	159231	121553	122790
Q61553	Fascin	Fscn1	93	10	1.998	0.044438	2.48733e+06	1.73072e+06	1.45122e+06	3.45749e+06	3.89514e+06	3.37897e+06
Q9CXW4	60S ribosomal protein L11	Rpl11	67	3	1.996	0.0497301	1.25585e+06	749838	855646	1.30355e+06	1.70788e+06	1.89653e+06
Q921M7	CYFIP-related Rac1 interactor B	Cyrib	10	3	1.992	0.0977083	51562.9	54102.4	30133.3	137270	102708	54616.7
Q9WUM3	Coronin-1B	Coro1b	9	2	1.977	0.00568438	110331	139766	109969	218108	209513	282337
Q9CQD1	Ras-related protein Rab-5A	Rab5a	20	2	1.97	0.0709322	57975.6	47738.5	44993.4	62021.3	94049.6	112361
Q99NI3	General transcription factor II-I repeat domain-containing protein 2	Gtf2ird2	2	2	1.969	0.0388509	41736.8	38625.1	21308.2	68187.6	92071.8	76068.8
Q8BM13	Noelin-2	Olfm2	5	2	1.967	0.168373	44146.2	44784.6	17077.9	89204.6	37640.5	86816
Q8C419	Probable G-protein coupled receptor 158	Gpr158	6	4	1.958	0.0886939	102332	67318.7	47580.1	149613	111265	131802
P70206	Plexin-A1	Plxna1	13	6	1.954	0.091773	77228.4	90888.5	58480.2	150927	272138	103657
P43006	Excitatory amino acid transporter 2	Slc1a2	70	7	1.93	0.115763	3.86821e+06	2.44348e+06	1.72834e+06	4.93042e+06	4.50049e+06	4.7152e+06
Q05816	Fatty acid-binding protein 5	Fabp5	65	7	1.927	0.267423	900380	1.87041e+06	572678	1.35882e+06	1.94528e+06	1.73526e+06
Q9CY27	Very-long-chain enoyl-CoA reductase	Tecr	12	3	1.924	0.0200239	241098	318187	219269	463913	453049	519643
Q62348	Translin	Tsn	25	5	1.916	0.120351	490988	283601	307720	426497	589583	917381
Q9Z0H4	CUGBP Elav-like family member 2	Celf2	5	3	1.904	0.34554	139916	50562.7	44637.8	84909.2	96264	149590
P07724	Albumin	Alb	449	32	1.904	0.480462	4.07166e+07	1.50917e+07	1.35979e+07	2.26395e+07	2.87314e+07	3.197e+07
Q9WUM4	Coronin-1C	Coro1c	39	5	1.903	0.184433	744339	401811	354371	556676	764788	1.00916e+06
P35278	Ras-related protein Rab-5C	Rab5c	28	3	1.899	0.164671	646210	280971	363647	525433	690665	836681
P62754	40S ribosomal protein S6	Rps6	30	3	1.895	0.0428622	602935	447297	363727	748975	847758	906453
P54823	Probable ATP-dependent RNA helicase DDX6	Ddx6	19	3	1.894	0.00287285	179344	165421	138352	313344	304005	395097
Q9JII6	Aldo-keto reductase family 1 member A1	Akr1a1	19	7	1.89	0.0729227	535841	334672	280468	595229	632501	798235
P47754	F-actin-capping protein subunit alpha-2	Capza2	36	5	1.887	0.158547	509735	639667	171130	836576	961698	997297
Q9WV92	Band 4.1-like protein 3	Epb41l3	44	7	1.885	0.0526779	717946	481765	445414	908068	865589	1.02512e+06
P61750	ADP-ribosylation factor 4	Arf4	91	2	1.884	0.0237373	686308	528680	457915	818556	995773	1.05507e+06
P35282	Ras-related protein Rab-21	Rab21	12	2	1.88	0.100996	64964.2	31169.3	43055.6	80943.7	60213	97573.1
Q99L47	Hsc70-interacting protein	St13	10	2	1.878	0.075856	39676.4	65425.3	39113.3	66075.8	74516.4	94203.3
Q61699	Heat shock protein 105 kDa	Hsph1	18	8	1.877	0.141062	482919	270441	264932	507647	411929	906789
P26638	Serine--tRNA ligase, cytoplasmic	Sars1	26	4	1.87	0.066269	365908	454000	234604	720667	500621	684131
P97449	Aminopeptidase N	Anpep	11	4	1.867	0.0326537	60110.6	109361	89670.9	167438	156782	211515
P62761	Visinin-like protein 1	Vsnl1	36	5	1.866	0.368241	777567	338055	282081	689874	630865	503181
P62823	Ras-related protein Rab-3C	Rab3c	35	2	1.852	0.0935598	601788	451837	280268	816418	845528	836794
P31648	Sodium- and chloride-dependent GABA transporter 1	Slc6a1	22	4	1.847	0.0728103	390800	310910	203385	576288	574169	499580
P62717	60S ribosomal protein L18a	Rpl18a	10	2	1.843	0.130947	451453	182662	277254	485053	510994	605874
Q8K596	Sodium/calcium exchanger 2	Slc8a2	6	3	1.843	0.0454249	43812.2	58821.3	35489.1	80742.3	77716.9	89231.6
Q9DCS9	NADH dehydrogenase	Ndufb10	17	3	1.837	0.567026	503230	150123	76475.9	156290	275777	447582
Q8K2C9	Very-long-chain (3R)-3-hydroxyacyl-CoA dehydratase 3	Hacd3	4	2	1.833	0.18852	140484	85253.3	40482.6	156249	140010	180774
P35564	Calnexin	Canx	11	4	1.83	0.206227	30167.4	57810	29302.4	57520.1	55194.8	54860.3
Q91V92	ATP-citrate synthase	Acly	39	8	1.826	0.0903325	605315	311213	415387	758672	628141	832799
Q8BTG7	Protein NDRG4	Ndrg4	9	2	1.822	0.566826	341155	135522	83683.8	141463	246930	268757
Q9JM76	Actin-related protein 2/3 complex subunit 3	Arpc3	19	3	1.82	0.370876	238879	69238.5	184222	121063	355378	335197
P35803	Neuronal membrane glycoprotein M6-b	Gpm6b	11	2	1.817	0.00135517	353200	316207	292737	574480	536764	641496
Q8CHC4	Synaptojanin-1	Synj1	20	4	1.816	0.237179	213292	69089.5	117903	190990	214170	215378
Q9JKD3	Secretory carrier-associated membrane protein 5	Scamp5	6	2	1.809	0.0668341	325687	226354	194566	398393	409505	441648
P61255	60S ribosomal protein L26	Rpl26	33	5	1.805	0.088315	487544	288316	333288	451094	601526	663272
Q62425	Cytochrome c oxidase subunit NDUFA4	Ndufa4	22	2	1.786	0.0139138	493164	406539	528189	843791	880581	881552
Q9CWJ9	Bifunctional purine biosynthesis protein ATIC	Atic	6	4	1.785	0.0958672	48937.8	21867.8	51650.7	87372.4	78817.4	92129.1
Q9CQR4	Acyl-coenzyme A thioesterase 13	Acot13	8	2	1.783	0.25336	173425	156545	162736	148851	290212	328034
P62869	Elongin-B	Elob	11	3	1.78	0.0916005	103220	77868.2	52503.1	144077	138597	108369
P63318	Protein kinase C gamma type	Prkcg	91	11	1.775	0.00088652	1.36951e+06	1.35777e+06	1.25659e+06	2.41064e+06	2.18685e+06	2.53989e+06
Q91V14	Solute carrier family 12 member 5	Slc12a5	71	16	1.774	0.00951282	1.65171e+06	1.86634e+06	1.39123e+06	2.92966e+06	3.08674e+06	2.39776e+06
Q921F4	Heterogeneous nuclear ribonucleoprotein L-like	Hnrnpll	28	6	1.756	0.0853961	417194	281255	270832	486174	496963	493805
O35643	AP-1 complex subunit beta-1	Ap1b1	74	4	1.754	0.193892	367119	126840	253694	445023	478160	318628
P20917	Myelin-associated glycoprotein	Mag	52	12	1.753	0.0248393	1.042e+06	1.16552e+06	702335	2.77005e+06	1.82647e+06	1.67442e+06
Q9QXS6	Drebrin	Dbn1	37	9	1.753	0.393328	1.03146e+06	390936	477058	582887	836159	1.09572e+06
O35226	26S proteasome non-ATPase regulatory subunit 4	Psmd4	11	2	1.751	0.228892	210874	110307	111551	152422	195334	323703
P21460	Cystatin-C	Cst3	5	2	1.745	0.0676925	62129.5	71518.7	34647.1	108423	130338	90475.3
Q8VDD5	Myosin-9	Myh9	21	6	1.735	0.219425	59353.8	20106.6	36771.5	79575.2	63812.1	44638.4
P47791	Glutathione reductase, mitochondrial	Gsr	6	2	1.734	0.170525	255339	127729	154198	211610	267340	312591
O35544	Excitatory amino acid transporter 4	Slc1a6	102	6	1.725	0.0750473	651700	620380	284161	939632	1.07037e+06	1.37111e+06
Q8C1B7	Septin-11	Septin11	74	5	1.724	0.0119192	1.92413e+06	1.69914e+06	1.36249e+06	2.71494e+06	2.93001e+06	3.34635e+06
Q9DCP2	Sodium-coupled neutral amino acid transporter 3	Slc38a3	11	3	1.724	0.0306234	244380	177373	195773	349120	337483	334629
Q9Z1D1	Eukaryotic translation initiation factor 3 subunit G	Eif3g	20	3	1.723	0.00348224	163139	145152	158747	247013	306723	273480
Q9R0P3	S-formylglutathione hydrolase	Esd	28	4	1.716	0.0365807	254412	166944	192507	330403	280685	395544
P62281	40S ribosomal protein S11	Rps11	55	8	1.712	0.123345	2.27954e+06	1.21994e+06	1.50372e+06	2.21497e+06	2.57407e+06	2.79428e+06
P68254	14-3-3 protein theta	Ywhaq	142	9	1.704	0.117027	4.14775e+06	2.46991e+06	2.79636e+06	3.78023e+06	4.76579e+06	5.03966e+06
Q921H8	3-ketoacyl-CoA thiolase A, peroxisomal	Acaa1a	19	3	1.704	0.71068	218584	102840	77763.4	80801.5	175197	204418
O88487	Cytoplasmic dynein 1 intermediate chain 2	Dync1i2	8	4	1.695	0.209941	63772.6	40539.4	29837.6	45961.6	68706.7	99356
Q9WUA3	ATP-dependent 6-phosphofructokinase, platelet type	Pfkp	15	2	1.689	0.14451	137443	80022.9	68791.9	225918	135144	118521
Q9WUM5	Succinate--CoA ligase	Suclg1	47	5	1.684	0.0420016	646858	443718	477430	785161	803915	898172
P31650	Sodium- and chloride-dependent GABA transporter 3	Slc6a11	29	4	1.681	0.231425	975864	1.15239e+06	286410	1.64021e+06	1.8127e+06	979503
P47962	60S ribosomal protein L5	Rpl5	34	7	1.68	0.0998002	1.42884e+06	657036	1.03225e+06	1.73395e+06	1.70263e+06	2.11134e+06
Q9R069	Basal cell adhesion molecule	Bcam	4	3	1.678	0.0999313	18950.9	27204.8	34981.7	45657.9	46229.4	35222
P62858	40S ribosomal protein S28	Rps28	5	2	1.671	0.28747	37019	46802	22219.1	61844.2	72639.1	30623.9
Q9D1R9	60S ribosomal protein L34	Rpl34	11	2	1.67	0.0753616	317271	189781	204758	330907	341935	464606
Q80XI4	Phosphatidylinositol 5-phosphate 4-kinase type-2 beta	Pip4k2b	8	3	1.667	0.0792108	120663	69632.9	85136.2	118497	141930	185467
P28474	Alcohol dehydrogenase class-3	Adh5	47	5	1.667	0.0960117	490691	250693	324220	524649	540319	693768
P62996	Transformer-2 protein homolog beta	Tra2b	16	2	1.662	0.0677511	150370	88801.4	113666	152139	188951	243811
Q9Z1G4	V-type proton ATPase 116 kDa subunit a 1	Atp6v0a1	63	9	1.662	0.111414	1.39401e+06	1.20825e+06	644910	2.04062e+06	1.76438e+06	2.00824e+06
O09167	60S ribosomal protein L21	Rpl21	8	2	1.662	0.0544638	147131	97178.2	108531	151653	203686	180348
P14094	Sodium/potassium-transporting ATPase subunit beta-1	Atp1b1	176	10	1.662	0.0375294	1.25479e+07	9.71518e+06	9.09564e+06	1.54294e+07	1.69266e+07	1.61437e+07
P47857	ATP-dependent 6-phosphofructokinase, muscle type	Pfkm	53	11	1.661	0.0999405	1.82681e+06	1.19337e+06	1.18786e+06	1.98179e+06	1.95088e+06	2.20339e+06
Q6P1F6	Serine/threonine-protein phosphatase 2A 55 kDa regulatory subunit B alpha isoform	Ppp2r2a	17	4	1.66	0.0202387	176900	177699	120844	244971	293660	342842
Q91YQ5	Dolichyl-diphosphooligosaccharide--protein glycosyltransferase subunit 1	Rpn1	18	4	1.657	0.0576543	311949	258650	270127	336104	447506	508148
Q91VR2	ATP synthase subunit gamma, mitochondrial	Atp5f1c	46	6	1.655	0.0527305	738519	1.01248e+06	614501	1.22232e+06	1.16026e+06	1.49569e+06
Q9R0K7	Plasma membrane calcium-transporting ATPase 2	Atp2b2	217	17	1.652	0.0490999	4.84729e+06	3.66914e+06	3.34671e+06	6.06261e+06	5.96535e+06	6.46109e+06
P61922	4-aminobutyrate aminotransferase, mitochondrial	Abat	136	17	1.652	0.0308564	3.086e+06	2.27346e+06	2.40383e+06	3.36758e+06	3.97044e+06	4.14215e+06
Q9Z2H5	Band 4.1-like protein 1	Epb41l1	38	8	1.647	0.0855996	620198	500055	346400	823582	782952	833513
P39053	Dynamin-1	Dnm1	166	16	1.645	0.062786	3.61425e+06	4.64533e+06	2.96219e+06	5.91296e+06	5.94433e+06	6.14658e+06
P80314	T-complex protein 1 subunit beta	Cct2	79	11	1.642	0.145739	1.00148e+06	638163	543410	1.04423e+06	1.04757e+06	1.1235e+06
Q9DB41	Mitochondrial glutamate carrier 2	Slc25a18	48	2	1.639	0.124826	1.27671e+06	874639	813192	1.17504e+06	1.4336e+06	1.4635e+06
Q6ZWN5	40S ribosomal protein S9	Rps9	24	3	1.639	0.0126831	950950	710302	783256	1.20454e+06	1.28342e+06	1.47022e+06
P27659	60S ribosomal protein L3	Rpl3	29	6	1.636	0.221426	632267	259250	399299	653307	463988	874153
P63005	Platelet-activating factor acetylhydrolase IB subunit beta	Pafah1b1	30	6	1.634	0.187886	849119	458794	546466	725106	893054	936539
P56564	Excitatory amino acid transporter 1	Slc1a3	131	7	1.625	0.0031361	5.50794e+06	4.65633e+06	4.66804e+06	7.57973e+06	7.5859e+06	8.62377e+06
P62880	Guanine nucleotide-binding protein G(I)/G(S)/G(T) subunit beta-2	Gnb2	144	5	1.621	0.0770477	2.06621e+06	1.48208e+06	1.52918e+06	1.95586e+06	2.47807e+06	2.59092e+06
Q9CX86	Heterogeneous nuclear ribonucleoprotein A0	Hnrnpa0	68	4	1.618	0.0253467	2.61098e+06	2.34608e+06	2.32162e+06	3.66302e+06	3.79687e+06	5.09446e+06
Q60930	Voltage-dependent anion-selective channel protein 2	Vdac2	116	10	1.618	0.0444845	6.76369e+06	5.30685e+06	4.85521e+06	8.16534e+06	8.83918e+06	8.5855e+06
P17426	AP-2 complex subunit alpha-1	Ap2a1	115	10	1.617	0.0296107	598291	646207	440905	967421	860299	1.02041e+06
P14115	60S ribosomal protein L27a	Rpl27a	18	2	1.617	0.167167	389715	210202	243236	319287	393219	552257
Q8BMS1	Trifunctional enzyme subunit alpha, mitochondrial	Hadha	43	13	1.612	0.0595185	959045	668116	662364	1.07714e+06	1.0379e+06	1.28158e+06
P61264	Syntaxin-1B	Stx1b	21	4	1.605	0.102363	261303	460912	343304	551101	534007	570182
Q60932	Voltage-dependent anion-selective channel protein 1	Vdac1	162	13	1.605	0.118637	1.03667e+07	6.21324e+06	7.19625e+06	9.71598e+06	1.15465e+07	1.26004e+07
P47738	Aldehyde dehydrogenase, mitochondrial	Aldh2	20	5	1.604	0.0218086	116449	104111	99618.9	166948	219830	157991
O88935	Synapsin-1	Syn1	46	9	1.602	0.0684946	427953	617309	384871	856575	685695	662468
Q9D8N0	Elongation factor 1-gamma	Eef1g	76	12	1.601	0.037645	1.87392e+06	1.44952e+06	1.53056e+06	2.14497e+06	2.44992e+06	3.21224e+06
P40124	Adenylyl cyclase-associated protein 1	Cap1	41	6	1.598	0.098712	526020	305681	372113	505915	594780	709341
Q62465	Synaptic vesicle membrane protein VAT-1 homolog	Vat1	28	6	1.598	0.0992287	361694	500150	343527	468851	578027	587281
P19324	Serpin H1	Serpinh1	11	5	1.596	0.121963	191924	90822.8	155146	178554	247627	343900
O55131	Septin-7	Septin7	16	7	1.596	0.038323	332335	427350	379002	639820	460137	604824
Q9Z0S1	3'(2'),5'-bisphosphate nucleotidase 1	Bpnt1	12	5	1.592	0.0247732	238673	198930	206899	329430	300578	424765
Q9CZM2	60S ribosomal protein L15	Rpl15	15	3	1.589	0.14199	662986	924214	590618	840301	1.05338e+06	1.72771e+06
P22892	AP-1 complex subunit gamma-1	Ap1g1	4	2	1.583	0.0431948	44483.3	44408.6	45547.9	70436.7	55787.7	72947.4
P04925	Major prion protein	Prnp	7	2	1.58	0.308723	17929.4	34907	18419	25865.1	37555.7	29110.8
Q6PDY2	2-aminoethanethiol dioxygenase	Ado	28	3	1.579	0.23972	155129	73873.4	96778.4	111157	152778	220599
Q9CZU6	Citrate synthase, mitochondrial	Cs	108	12	1.578	0.0674952	4.14163e+06	2.67272e+06	3.07096e+06	4.84562e+06	4.19499e+06	6.44262e+06
P07901	Heat shock protein HSP 90-alpha	Hsp90aa1	324	16	1.578	0.101348	7.00832e+06	4.95688e+06	4.95946e+06	8.0612e+06	6.84784e+06	7.82369e+06
Q9JHI5	Isovaleryl-CoA dehydrogenase, mitochondrial	Ivd	22	4	1.576	0.239161	397718	225723	229605	305503	361892	500597
P63001	Ras-related C3 botulinum toxin substrate 1	Rac1	125	8	1.575	0.0184338	7.20033e+06	5.3103e+06	6.4433e+06	8.57142e+06	1.0151e+07	1.10598e+07
O88342	WD repeat-containing protein 1	Wdr1	107	10	1.574	0.0533893	2.94462e+06	2.11695e+06	2.16625e+06	3.11545e+06	3.40936e+06	3.83632e+06
Q11011	Puromycin-sensitive aminopeptidase	Npepps	50	12	1.572	0.0343911	893875	834175	679264	1.31136e+06	1.00818e+06	1.45002e+06
Q9R0Q9	Mannose-P-dolichol utilization defect 1 protein	Mpdu1	6	2	1.571	0.209721	108885	87257.5	25161.3	137059	129164	160979
Q7TMK9	Heterogeneous nuclear ribonucleoprotein Q	Syncrip	32	5	1.57	0.0254726	370810	504600	390461	586062	613207	740447
Q9CQJ8	NADH dehydrogenase	Ndufb9	6	2	1.57	0.310763	113754	59492.7	77356.1	121471	162557	74476.5
P80315	T-complex protein 1 subunit delta	Cct4	109	13	1.57	0.12015	2.29037e+06	1.66361e+06	1.37697e+06	2.11824e+06	2.61229e+06	2.79866e+06
Q8BLE7	Vesicular glutamate transporter 2	Slc17a6	21	3	1.567	0.29923	507458	377516	206915	654628	591708	340520
Q9QZQ8	Core histone macro-H2A.1	Macroh2a1	21	3	1.563	0.069345	439184	225201	410755	563756	641913	820939
Q99LF4	RNA-splicing ligase RtcB homolog	Rtcb	4	3	1.561	0.0310131	124930	92859.7	95805	143866	149570	171941
Q6ZWX6	Eukaryotic translation initiation factor 2 subunit 1	Eif2s1	11	3	1.559	0.169429	147691	88319.7	95613.2	123103	149040	193935
O35841	Apoptosis inhibitor 5	Api5	17	4	1.559	0.0715133	74506	138720	135834	211705	176207	249432
P84091	AP-2 complex subunit mu	Ap2m1	80	14	1.558	0.0999852	2.04396e+06	1.45488e+06	1.28279e+06	2.45265e+06	2.2325e+06	2.26608e+06
P08752	Guanine nucleotide-binding protein G(i) subunit alpha-2	Gnai2	57	6	1.552	0.150012	992074	597055	636387	885912	987619	1.22659e+06
Q6ZWU9	40S ribosomal protein S27	Rps27	8	3	1.552	0.0985647	749443	496286	577622	688365	896193	1.01904e+06
Q5SQX6	Cytoplasmic FMR1-interacting protein 2	Cyfip2	48	6	1.551	0.119524	457368	346274	256984	502669	547639	537221
Q8BH95	Enoyl-CoA hydratase, mitochondrial	Echs1	35	4	1.55	0.101077	479864	319290	306347	494763	466110	640969
Q6GQT9	Nodal modulator 1	Nomo1	5	2	1.549	0.248125	61324	16406	42493.5	65805	61730.5	70157.9
P48962	ADP/ATP translocase 1	Slc25a4	379	10	1.548	0.0285322	3.49903e+07	2.82561e+07	2.7964e+07	4.37476e+07	4.28952e+07	4.58214e+07
P47963	60S ribosomal protein L13	Rpl13	19	4	1.548	0.0878373	368370	278941	268050	343857	431822	452140
P25444	40S ribosomal protein S2	Rps2	48	7	1.548	0.0194229	1.05011e+06	730327	988466	1.52966e+06	1.52337e+06	2.22341e+06
P41105	60S ribosomal protein L28	Rpl28	7	2	1.546	0.0467781	232216	180743	159230	279382	314541	260881
P97427	Dihydropyrimidinase-related protein 1	Crmp1	321	15	1.546	0.00301455	5.62504e+06	4.94443e+06	5.11981e+06	6.96967e+06	7.91388e+06	7.9394e+06
Q8K183	Pyridoxal kinase	Pdxk	35	3	1.545	0.049735	541961	420093	462453	550582	714709	742168
P45376	Aldo-keto reductase family 1 member B1	Akr1b1	8	3	1.545	0.0383186	202046	160148	155134	213227	247500	252451
P60202	Myelin proteolipid protein	Plp1	151	7	1.544	0.0188866	1.47506e+07	1.38303e+07	1.06443e+07	2.13602e+07	1.87457e+07	2.57139e+07
Q9JIS5	Synaptic vesicle glycoprotein 2A	Sv2a	33	5	1.544	0.021721	250223	211461	199079	385000	286623	326577
P49442	Inositol polyphosphate 1-phosphatase	Inpp1	7	2	1.537	0.0576394	53220.6	43937.5	34858.9	73236.6	56295.2	67552.4
P61027	Ras-related protein Rab-10	Rab10	27	4	1.536	0.116565	835666	313316	807544	1.18594e+06	1.24062e+06	1.64421e+06
P48758	Carbonyl reductase	Cbr1	25	3	1.532	0.0376797	313377	447936	408289	625542	506203	740019
Q8VEK3	Heterogeneous nuclear ribonucleoprotein U	Hnrnpu	224	16	1.532	0.0609647	6.97672e+06	4.95788e+06	5.06998e+06	7.76748e+06	7.16748e+06	9.84794e+06
Q91V12	Cytosolic acyl coenzyme A thioester hydrolase	Acot7	77	8	1.532	0.0227325	2.15895e+06	2.17497e+06	1.71742e+06	3.27084e+06	3.33709e+06	3.30697e+06
Q791V5	Mitochondrial carrier homolog 2	Mtch2	50	7	1.53	0.0646695	1.22619e+06	890091	896975	1.37237e+06	1.336e+06	1.52918e+06
Q9JIF7	Coatomer subunit beta	Copb1	10	2	1.528	0.0245442	91317.8	82692.6	65200.6	126388	110794	156160
Q9D0F9	Phosphoglucomutase-1	Pgm1	9	3	1.528	0.260023	160164	105454	36023.9	154511	161106	192712
P61082	NEDD8-conjugating enzyme Ubc12	Ube2m	21	5	1.526	0.0872018	419448	316364	319861	397435	488064	579387
Q8BGT8	Phytanoyl-CoA hydroxylase-interacting protein-like	Phyhipl	67	8	1.525	0.0253767	1.27199e+06	1.09176e+06	946675	1.44228e+06	1.6652e+06	1.94676e+06
P62821	Ras-related protein Rab-1A	Rab1A	42	2	1.525	0.0652888	401458	345143	259666	422282	526312	689762
G5E829	Plasma membrane calcium-transporting ATPase 1	Atp2b1	150	7	1.522	0.0794123	1.21007e+06	927875	756362	1.41234e+06	1.3571e+06	1.56522e+06
P68040	Receptor of activated protein C kinase 1	Rack1	115	13	1.521	0.0575835	4.23866e+06	3.10786e+06	3.19504e+06	4.41784e+06	4.85883e+06	5.33306e+06
Q9WUA2	Phenylalanine--tRNA ligase beta subunit	Farsb	17	5	1.519	0.474383	192505	105516	96369.3	160276	109323	230203
B2RSH2	Guanine nucleotide-binding protein G(i) subunit alpha-1	Gnai1	49	2	1.518	0.141559	181146	120129	122426	172825	185789	204934
P63163	Small nuclear ribonucleoprotein-associated protein N	Snrpn	10	2	1.517	0.0746542	390217	292062	274400	379809	443177	531935
P62748	Hippocalcin-like protein 1	Hpcal1	6	2	1.515	0.0454574	180902	141029	156799	291018	197694	237537
Q9WV55	Vesicle-associated membrane protein-associated protein A	Vapa	43	5	1.515	0.0974351	1.15187e+06	848823	791459	1.0714e+06	1.28581e+06	1.51614e+06
Q8VEM8	Phosphate carrier protein, mitochondrial	Slc25a3	108	9	1.515	0.280025	3.75203e+06	2.05049e+06	1.85648e+06	3.02239e+06	3.10587e+06	3.9864e+06
Q3U0V1	Far upstream element-binding protein 2	Khsrp	45	8	1.514	0.103406	1.06719e+06	721355	809529	996825	1.22583e+06	1.27684e+06
Q9WV60	Glycogen synthase kinase-3 beta	Gsk3b	22	4	1.512	0.116705	404709	248248	276582	418309	403162	495578
Q9Z1Z2	Serine-threonine kinase receptor-associated protein	Strap	7	2	1.512	0.0968755	57626.9	34197.6	51425.9	56589.3	77775.3	92552.7
Q5M8N0	CB1 cannabinoid receptor-interacting protein 1	Cnrip1	32	3	1.509	0.0338842	416561	489058	466715	704453	737056	553849
Q6ZQ38	Cullin-associated NEDD8-dissociated protein 1	Cand1	100	19	1.509	0.026203	1.12503e+06	1.25114e+06	984905	1.6978e+06	1.36562e+06	1.72081e+06
P06151	L-lactate dehydrogenase A chain	Ldha	133	14	1.508	0.0940857	1.03473e+07	6.7286e+06	7.46331e+06	1.0188e+07	1.12531e+07	1.30722e+07
Q9QUR6	Prolyl endopeptidase	Prep	31	9	1.506	0.190477	806119	313135	531659	800889	800329	1.00214e+06
Q8VDM4	26S proteasome non-ATPase regulatory subunit 2	Psmd2	38	7	1.505	0.0553622	663755	516296	472142	676189	776870	893486
P61205	ADP-ribosylation factor 3	Arf3	129	7	1.501	0.0154783	5.76933e+06	4.90433e+06	4.92732e+06	6.45668e+06	7.97572e+06	7.39778e+06
P86048	60S ribosomal protein L10-like	Rpl10l	14	3	1.5	0.103298	229164	154367	175728	211404	263608	288835
P62743	AP-2 complex subunit sigma	Ap2s1	23	2	1.49	0.0427125	596398	434459	454256	658284	676780	805709
P35980	60S ribosomal protein L18	Rpl18	20	2	1.487	0.491533	228329	141974	82743.4	211124	105386	329846
P62267	40S ribosomal protein S23	Rps23	9	2	1.487	0.0663564	134047	83579.6	137601	192446	199294	218768
Q9CPU4	Microsomal glutathione S-transferase 3	Mgst3	4	2	1.486	0.0185158	103317	88045.2	76624.6	130866	153924	126696
Q9Z0N1	Eukaryotic translation initiation factor 2 subunit 3, X-linked	Eif2s3x	19	3	1.486	0.22221	439156	227096	286332	393439	425397	463813
Q9Z2I9	Succinate--CoA ligase	Sucla2	28	4	1.486	0.144084	528825	328725	340977	506555	495244	655270
Q9JLZ3	Methylglutaconyl-CoA hydratase, mitochondrial	Auh	15	3	1.484	0.180838	121142	67273.4	79600.6	107508	118159	142064
P51881	ADP/ATP translocase 2	Slc25a5	291	8	1.483	0.0399875	8.55998e+06	6.33803e+06	6.65766e+06	9.81061e+06	9.8738e+06	1.12693e+07
P11881	Inositol 1,4,5-trisphosphate receptor type 1	Itpr1	341	45	1.482	0.0363178	8.31428e+06	9.24549e+06	6.43037e+06	1.23199e+07	1.05229e+07	1.40066e+07
Q9QYG0	Protein NDRG2	Ndrg2	81	7	1.481	0.0162887	2.34504e+06	1.87749e+06	2.0525e+06	2.80988e+06	3.12666e+06	3.03911e+06
P49312	Heterogeneous nuclear ribonucleoprotein A1	Hnrnpa1	124	13	1.481	0.0501424	2.1513e+06	2.39896e+06	2.83651e+06	3.55196e+06	2.87053e+06	3.81194e+06
Q9JJV2	Profilin-2	Pfn2	30	3	1.478	0.145632	522235	276995	367181	519199	542852	640195
P61982	14-3-3 protein gamma	Ywhag	158	4	1.478	0.0188798	2.26747e+06	1.98411e+06	1.71296e+06	2.76118e+06	3.257e+06	2.93164e+06
P28352	DNA-(apurinic or apyrimidinic site) endonuclease	Apex1	18	4	1.477	0.413698	411719	130345	248403	382609	266924	366800
P35802	Neuronal membrane glycoprotein M6-a	Gpm6a	57	5	1.477	0.0362661	2.9088e+06	2.42694e+06	2.15288e+06	3.58369e+06	3.23281e+06	3.79787e+06
Q00PI9	Heterogeneous nuclear ribonucleoprotein U-like protein 2	Hnrnpul2	24	5	1.476	0.0609715	330006	295196	214939	354400	435845	483529
Q9DB72	BTB/POZ domain-containing protein 17	Btbd17	49	11	1.474	0.206026	864274	209623	861678	1.43299e+06	1.15219e+06	1.27051e+06
Q8CI94	Glycogen phosphorylase, brain form	Pygb	105	13	1.471	0.0789713	982097	855658	634451	1.18266e+06	1.25895e+06	1.26271e+06
Q8BK67	Protein RCC2	Rcc2	8	2	1.47	0.32461	94288.3	20480.5	53791	69896	79089	105854
O54734	Dolichyl-diphosphooligosaccharide--protein glycosyltransferase 48 kDa subunit	Ddost	17	3	1.469	0.208271	445843	271633	185933	390460	399061	563780
Q60931	Voltage-dependent anion-selective channel protein 3	Vdac3	98	9	1.465	0.0523245	7.29306e+06	5.15022e+06	5.71184e+06	7.97535e+06	8.36791e+06	9.541e+06
P14824	Annexin A6	Anxa6	96	15	1.465	0.0391701	1.14968e+06	1.45736e+06	1.24566e+06	1.82444e+06	1.5629e+06	2.14671e+06
Q9DBP5	UMP-CMP kinase	Cmpk1	27	5	1.464	0.136471	393833	218275	276605	395164	404824	484246
Q6PHN9	Ras-related protein Rab-35	Rab35	19	3	1.462	0.0636939	1.91984e+06	1.38361e+06	1.55316e+06	2.00118e+06	2.32004e+06	2.27143e+06
Q9R0Y5	Adenylate kinase isoenzyme 1	Ak1	9	2	1.458	0.145884	129836	77422.6	96468.1	140662	144731	133349
P12970	60S ribosomal protein L7a	Rpl7a	25	6	1.457	0.053416	393470	369598	231647	486891	538588	755787
P52480	Pyruvate kinase PKM	Pkm	324	22	1.454	0.0309362	1.48325e+07	1.21456e+07	1.13078e+07	1.65609e+07	1.76614e+07	2.18543e+07
P28663	Beta-soluble NSF attachment protein	Napb	22	4	1.453	0.239488	351865	346408	278579	554225	303587	503265
P62889	60S ribosomal protein L30	Rpl30	10	3	1.45	0.0774035	269038	153874	214735	303821	311412	399233
Q9CQW2	ADP-ribosylation factor-like protein 8B	Arl8b	29	2	1.449	0.203001	733426	434552	509794	613291	738835	848638
Q6WVG3	BTB/POZ domain-containing protein KCTD12	Kctd12	43	9	1.448	0.0374741	1.00608e+06	890312	749584	1.22711e+06	1.28951e+06	1.81398e+06
Q9D051	Pyruvate dehydrogenase E1 component subunit beta, mitochondrial	Pdhb	69	11	1.448	0.0908551	1.16244e+06	1.19813e+06	707639	1.68349e+06	1.43135e+06	1.7558e+06
P16330	2',3'-cyclic-nucleotide 3'-phosphodiesterase	Cnp	372	26	1.447	0.0600282	1.22183e+07	1.09414e+07	9.65815e+06	1.58287e+07	1.33889e+07	2.03543e+07
P67984	60S ribosomal protein L22	Rpl22	16	2	1.447	0.146797	375661	217949	271046	346944	392088	461739
Q8CHH9	Septin-8	Septin8	49	4	1.445	0.139454	96380.8	90583.8	49358.2	130969	110296	130876
P60867	40S ribosomal protein S20	Rps20	46	3	1.443	0.185822	2.43769e+06	1.509e+06	1.79397e+06	2.01837e+06	2.58819e+06	3.13192e+06
P50580	Proliferation-associated protein 2G4	Pa2g4	51	8	1.442	0.0632341	891396	607115	693307	937412	999675	1.19145e+06
P51880	Fatty acid-binding protein, brain	Fabp7	158	8	1.441	0.161597	1.53385e+07	9.90871e+06	1.1287e+07	1.3144e+07	1.62598e+07	2.01007e+07
Q9ES97	Reticulon-3	Rtn3	20	2	1.44	0.0841651	850449	643374	588336	883934	926328	1.03592e+06
Q9CZ13	Cytochrome b-c1 complex subunit 1, mitochondrial	Uqcrc1	177	15	1.44	0.265714	6.83551e+06	4.14874e+06	4.72889e+06	5.33274e+06	6.80738e+06	7.59679e+06
O55143	Sarcoplasmic/endoplasmic reticulum calcium ATPase 2	Atp2a2	238	28	1.437	0.0503689	5.32848e+06	4.14462e+06	4.18889e+06	6.5355e+06	5.83248e+06	6.01886e+06
P49615	Cyclin-dependent kinase 5	Cdk5	15	3	1.435	0.202666	419027	313196	171848	441908	449311	490574
Q9D0K2	Succinyl-CoA:3-ketoacid coenzyme A transferase 1, mitochondrial	Oxct1	64	12	1.432	0.0286403	1.35998e+06	1.51225e+06	1.47029e+06	2.10511e+06	1.827e+06	2.39941e+06
Q9D0M3	Cytochrome c1, heme protein, mitochondrial	Cyc1	21	5	1.431	0.0732695	770014	793573	765738	1.10185e+06	977327	1.44695e+06
P48722	Heat shock 70 kDa protein 4L	Hspa4l	18	5	1.43	0.0802511	235806	187975	168618	268898	253771	277038
P20357	Microtubule-associated protein 2	Map2	55	8	1.43	0.131345	751338	533788	449339	763516	923192	732430
Q9Z1X4	Interleukin enhancer-binding factor 3	Ilf3	14	4	1.43	0.0686101	108255	74824	85655.2	122489	120788	135875
O08756	3-hydroxyacyl-CoA dehydrogenase type-2	Hsd17b10	9	3	1.43	0.0648633	156178	139611	104579	173663	199585	285988
Q3TXS7	26S proteasome non-ATPase regulatory subunit 1	Psmd1	29	7	1.426	0.135266	252889	178055	211198	301497	227316	301228
P10126	Elongation factor 1-alpha 1	Eef1a1	389	8	1.423	0.055775	4.0697e+07	3.24281e+07	3.35551e+07	4.05683e+07	4.77546e+07	5.27124e+07
O08749	Dihydrolipoyl dehydrogenase, mitochondrial	Dld	66	7	1.422	0.0306193	1.07175e+06	1.01332e+06	805311	1.32072e+06	1.50268e+06	1.44089e+06
P11276	Fibronectin	Fn1	256	38	1.422	0.628789	6.32608e+06	2.50868e+06	2.57754e+06	2.92746e+06	3.66498e+06	7.2302e+06
P24527	Leukotriene A-4 hydrolase	Lta4h	11	3	1.42	0.158279	150703	105126	104360	133951	149286	196024
P53810	Phosphatidylinositol transfer protein alpha isoform	Pitpna	13	2	1.418	0.0552198	206251	217576	209849	297637	251370	335320
Q8K2B3	Succinate dehydrogenase	Sdha	77	15	1.417	0.0596799	2.65649e+06	2.10476e+06	1.92199e+06	2.73602e+06	2.98328e+06	3.43478e+06
Q9DBG3	AP-2 complex subunit beta	Ap2b1	102	8	1.417	0.0686604	2.9838e+06	2.511e+06	2.13727e+06	3.5589e+06	3.20155e+06	3.5882e+06
Q9DCL9	Bifunctional phosphoribosylaminoimidazole carboxylase/phosphoribosylaminoimidazole succinocarboxamide synthetase	Paics	21	6	1.415	0.0629107	591530	497030	432977	599928	724938	703315
Q62167	ATP-dependent RNA helicase DDX3X	Ddx3x	51	9	1.415	0.391804	697209	432536	382173	538734	611887	635803
P45952	Medium-chain specific acyl-CoA dehydrogenase, mitochondrial	Acadm	15	4	1.411	0.143828	48548.2	44501.6	26072.2	47634.5	62812.5	68821.2
P38647	Stress-70 protein, mitochondrial	Hspa9	51	10	1.411	0.231453	1.47569e+06	734367	982638	1.27171e+06	1.38666e+06	1.66384e+06
Q64521	Glycerol-3-phosphate dehydrogenase, mitochondrial	Gpd2	4	3	1.41	0.0589208	104863	104497	98523.9	147329	137747	201198
P11499	Heat shock protein HSP 90-beta	Hsp90ab1	436	18	1.41	0.0560432	1.74231e+07	1.32999e+07	1.3276e+07	1.87475e+07	1.8401e+07	2.24074e+07
P05132	cAMP-dependent protein kinase catalytic subunit alpha	Prkaca	29	5	1.409	0.0695152	769666	616189	482489	843423	1.28542e+06	868213
O08599	Syntaxin-binding protein 1	Stxbp1	250	24	1.407	0.0626766	7.90991e+06	6.8899e+06	5.61415e+06	9.97494e+06	9.69334e+06	9.09898e+06
P19096	Fatty acid synthase	Fasn	243	39	1.405	0.0686615	3.52841e+06	2.80843e+06	2.54759e+06	3.94582e+06	3.53798e+06	4.78153e+06
Q9Z1Q2	Phosphatidylserine lipase ABHD16A	Abhd16a	4	3	1.404	0.19853	143237	113254	73257.6	159033	128290	172636
P70404	Isocitrate dehydrogenase	Idh3g	32	7	1.404	0.0192792	425171	408520	397487	680150	573531	554084
P68510	14-3-3 protein eta	Ywhah	135	9	1.404	0.00721761	2.63734e+06	2.71618e+06	2.30585e+06	3.70198e+06	3.29141e+06	3.81831e+06
Q9DC69	NADH dehydrogenase	Ndufa9	22	6	1.402	0.00168836	174688	157436	174502	261609	244681	230933
Q99PU5	Long-chain-fatty-acid--CoA ligase ACSBG1	Acsbg1	57	8	1.399	0.538885	985647	1.30667e+06	557151	1.74346e+06	1.37897e+06	653088
Q61316	Heat shock 70 kDa protein 4	Hspa4	104	14	1.398	0.106819	2.61557e+06	2.06093e+06	1.77431e+06	2.88092e+06	2.78338e+06	3.00938e+06
Q9QXZ0	Microtubule-actin cross-linking factor 1, isoforms 1/2/3/4	Macf1	3	3	1.397	0.36188	29735	193999	352177	255487	271039	402001
P27612	Phospholipase A-2-activating protein	Plaa	3	3	1.395	0.234415	27114.2	17172.7	12483.9	23963.1	22083.4	34691.9
P12382	ATP-dependent 6-phosphofructokinase, liver type	Pfkl	29	2	1.395	0.318297	103196	63488.1	62001.7	88577.3	105578	83999.5
Q61425	Hydroxyacyl-coenzyme A dehydrogenase, mitochondrial	Hadh	8	2	1.393	0.0652543	120922	94372	92685.6	123377	131470	148044
Q61598	Rab GDP dissociation inhibitor beta	Gdi2	147	13	1.392	0.0517999	3.1579e+06	2.60743e+06	2.32951e+06	3.28689e+06	3.63027e+06	4.10116e+06
P60335	Poly(rC)-binding protein 1	Pcbp1	165	9	1.391	0.151188	4.9978e+06	3.19929e+06	3.79184e+06	4.41324e+06	5.27456e+06	6.73909e+06
Q8VDN2	Sodium/potassium-transporting ATPase subunit alpha-1	Atp1a1	549	18	1.391	0.0475667	5.31769e+06	5.20328e+06	3.92727e+06	7.23517e+06	7.45105e+06	7.15872e+06
P34884	Macrophage migration inhibitory factor	Mif	93	3	1.39	0.937373	5.12795e+06	4.11053e+06	4.05541e+06	5.71543e+06	6.5646e+06	2.47444e+06
Q5SUR0	Phosphoribosylformylglycinamidine synthase	Pfas	6	3	1.39	0.525374	34733.9	33006.5	30856.4	45876.2	22743.5	74831.4
P15105	Glutamine synthetase	Glul	175	12	1.385	0.111645	5.6396e+06	4.43931e+06	3.68252e+06	6.12723e+06	6.57569e+06	6.14795e+06
Q9JLM8	Serine/threonine-protein kinase DCLK1	Dclk1	43	6	1.384	0.264566	1.03585e+06	536095	745592	771260	1.449e+06	1.03211e+06
Q8QZT1	Acetyl-CoA acetyltransferase, mitochondrial	Acat1	172	15	1.384	0.229106	6.19381e+06	4.02611e+06	3.94365e+06	5.15897e+06	5.57252e+06	8.1857e+06
P51863	V-type proton ATPase subunit d 1	Atp6v0d1	29	4	1.383	0.0842734	690378	735510	487573	955121	814596	968314
Q8BZ98	Dynamin-3	Dnm3	58	4	1.382	0.175493	466670	503142	619839	695462	699045	540842
D3Z7P3	Glutaminase kidney isoform, mitochondrial	Gls	18	5	1.38	0.0835458	211126	259528	175754	326331	291337	267983
Q8BH59	Electrogenic aspartate/glutamate antiporter SLC25A12, mitochondrial	Slc25a12	37	7	1.38	0.166703	882236	772943	447235	1.06656e+06	832453	1.23714e+06
Q3UH60	Disco-interacting protein 2 homolog B	Dip2b	14	3	1.38	0.0934838	85747.4	63694.8	60044.5	86580	87884.1	106506
Q9D1G1	Ras-related protein Rab-1B	Rab1b	46	4	1.379	0.143048	1.20242e+06	734979	951613	1.26117e+06	1.31254e+06	1.36538e+06
Q60864	Stress-induced-phosphoprotein 1	Stip1	38	5	1.379	0.104238	597092	474277	361429	654151	599384	812998
Q64674	Spermidine synthase	Srm	4	2	1.379	0.185488	104461	56361.2	83170.2	93480.8	114704	129545
Q91VI7	Ribonuclease inhibitor	Rnh1	27	4	1.379	0.621857	513813	253176	234925	294445	349151	474421
P62702	40S ribosomal protein S4, X isoform	Rps4x	59	8	1.374	0.104003	1.88993e+06	1.26631e+06	1.46918e+06	1.81837e+06	2.01936e+06	2.6343e+06
Q8BUV3	Gephyrin	Gphn	18	4	1.372	0.26838	287210	163791	195854	236098	268700	308327
P62908	40S ribosomal protein S3	Rps3	117	15	1.372	0.0410858	2.83508e+06	2.08267e+06	2.50516e+06	3.10375e+06	3.43621e+06	3.87535e+06
P10630	Eukaryotic initiation factor 4A-II	Eif4a2	104	4	1.37	0.0628704	675821	632607	566018	866743	830522	1.25264e+06
O35286	ATP-dependent RNA helicase DHX15	Dhx15	27	6	1.369	0.0782289	278594	244640	243923	334830	287190	395736
Q9EPN1	Neurobeachin	Nbea	14	6	1.369	0.155053	98011.5	72861.3	65356.7	99722.4	106173	97677.7
Q91VR5	ATP-dependent RNA helicase DDX1	Ddx1	49	12	1.368	0.0122989	546729	465876	565111	700532	748127	873356
Q60605	Myosin light polypeptide 6	Myl6	20	4	1.368	0.213324	711040	346731	494031	607998	675882	900060
Q9CZY3	Ubiquitin-conjugating enzyme E2 variant 1	Ube2v1	32	3	1.368	0.315043	998557	437009	701543	738646	959516	1.14688e+06
Q61990	Poly(rC)-binding protein 2	Pcbp2	132	5	1.365	0.0686629	2.26339e+06	1.67948e+06	1.88376e+06	2.25081e+06	2.57124e+06	2.91619e+06
P53994	Ras-related protein Rab-2A	Rab2a	53	4	1.363	0.229767	1.09368e+06	613229	793169	1.08105e+06	1.10037e+06	1.05265e+06
Q9ERD7	Tubulin beta-3 chain	Tubb3	1145	8	1.363	0.000559163	9.18275e+06	8.9866e+06	9.64212e+06	1.18924e+07	1.25138e+07	1.25179e+07
Q9R0Q6	Actin-related protein 2/3 complex subunit 1A	Arpc1a	11	2	1.361	0.0656788	252082	236917	179364	329417	319918	322430
P70168	Importin subunit beta-1	Kpnb1	36	7	1.36	0.049089	180699	271431	270283	367717	334122	458313
P63011	Ras-related protein Rab-3A	Rab3a	119	4	1.36	0.0842287	3.51753e+06	2.89019e+06	2.53732e+06	3.93198e+06	3.87073e+06	4.11803e+06
P14685	26S proteasome non-ATPase regulatory subunit 3	Psmd3	4	3	1.358	0.159296	160845	129621	138451	146908	187973	221103
P28652	Calcium/calmodulin-dependent protein kinase type II subunit beta	Camk2b	114	6	1.356	0.151991	2.82362e+06	2.46065e+06	1.59207e+06	3.33696e+06	3.11567e+06	3.38985e+06
E9Q912	Rap1 GTPase-GDP dissociation stimulator 1	Rap1gds1	54	11	1.356	0.0803099	660718	583330	419111	790879	760592	909510
P35486	Pyruvate dehydrogenase E1 component subunit alpha, somatic form, mitochondrial	Pdha1	167	17	1.354	0.153111	5.13706e+06	3.84444e+06	3.72614e+06	4.772e+06	5.20634e+06	5.71381e+06
Q8VE33	Ganglioside-induced differentiation-associated protein 1-like 1	Gdap1l1	16	3	1.354	0.0410832	124275	95828.9	117458	161400	148846	159030
Q8BK64	Activator of 90 kDa heat shock protein ATPase homolog 1	Ahsa1	42	5	1.353	0.39495	277294	196495	437690	344616	375053	389907
Q8CIE6	Coatomer subunit alpha	Copa	23	6	1.351	0.163701	220313	152322	135323	205723	200951	300603
Q920N2	Biotin--protein ligase	Hlcs	12	2	1.35	0.0174477	60165.3	71760.2	64307.8	88721.8	79890.6	86834.4
P47911	60S ribosomal protein L6	Rpl6	48	6	1.35	0.0840726	1.18502e+06	1.1624e+06	1.15958e+06	1.34224e+06	1.56916e+06	1.84968e+06
O08709	Peroxiredoxin-6	Prdx6	78	11	1.348	0.100976	1.26859e+06	877446	1.05856e+06	1.41191e+06	1.46554e+06	1.42705e+06
P63330	Serine/threonine-protein phosphatase 2A catalytic subunit alpha isoform	Ppp2ca	18	4	1.347	0.354501	460086	179838	547252	619834	335491	897461
P80317	T-complex protein 1 subunit zeta	Cct6a	48	7	1.347	0.0847908	1.82765e+06	1.41914e+06	1.33707e+06	1.91117e+06	1.84728e+06	2.23117e+06
Q922D8	C-1-tetrahydrofolate synthase, cytoplasmic	Mthfd1	9	2	1.344	0.821878	51295.3	55862.8	87581.6	75087.7	49099.5	80130.7
Q9R1T4	Septin-6	Septin6	43	2	1.343	0.206788	118047	80731.4	80164.3	108141	129970	108433
Q9CZC8	Secernin-1	Scrn1	105	11	1.343	0.473131	2.55854e+06	1.12139e+06	1.648e+06	1.57509e+06	2.21258e+06	2.70076e+06
P17427	AP-2 complex subunit alpha-2	Ap2a2	105	12	1.343	0.0315137	2.29228e+06	2.18161e+06	1.8785e+06	2.92893e+06	2.49645e+06	3.15526e+06
P60487	Chronophin	Pdxp	56	6	1.342	0.359572	571760	331892	413063	417562	554425	632679
P50516	V-type proton ATPase catalytic subunit A	Atp6v1a	96	18	1.341	0.0126647	1.68306e+06	1.81206e+06	1.66902e+06	2.25615e+06	2.01618e+06	2.31039e+06
Q9R0P9	Ubiquitin carboxyl-terminal hydrolase isozyme L1	Uchl1	95	11	1.338	0.572606	5.02818e+06	2.39075e+06	2.89336e+06	3.13856e+06	3.87152e+06	4.59064e+06
P20108	Thioredoxin-dependent peroxide reductase, mitochondrial	Prdx3	68	7	1.338	0.241922	2.09918e+06	1.14317e+06	1.63954e+06	1.74664e+06	2.19344e+06	2.46333e+06
Q91WC3	Long-chain-fatty-acid--CoA ligase 6	Acsl6	13	3	1.338	0.224	117013	139283	77583.2	124149	156508	158469
O55137	Acyl-coenzyme A thioesterase 1	Acot1	66	11	1.329	0.295402	1.33342e+06	738293	982455	994325	1.3056e+06	1.74081e+06
P14152	Malate dehydrogenase, cytoplasmic	Mdh1	179	9	1.326	0.05735	6.5773e+06	5.7744e+06	5.95719e+06	7.90023e+06	6.61803e+06	7.98113e+06
Q99K48	Non-POU domain-containing octamer-binding protein	Nono	18	2	1.326	0.0832751	326935	231672	265730	344894	352233	506173
P80318	T-complex protein 1 subunit gamma	Cct3	72	12	1.325	0.122761	1.52258e+06	1.03314e+06	1.42699e+06	1.89556e+06	1.50077e+06	1.89017e+06
Q9EQH3	Vacuolar protein sorting-associated protein 35	Vps35	21	5	1.324	0.0602567	276981	282050	295387	373494	329463	428193
Q922Q4	Pyrroline-5-carboxylate reductase 2	Pycr2	5	2	1.323	0.670475	160530	81284.2	78343.9	93498.1	107565	148408
P16546	Spectrin alpha chain, non-erythrocytic 1	Sptan1	327	57	1.323	0.156021	7.08262e+06	8.53599e+06	6.05069e+06	9.73362e+06	7.7279e+06	9.3702e+06
Q8CAA7	Glucose 1,6-bisphosphate synthase	Pgm2l1	5	2	1.322	0.294706	181225	90853	108529	138589	143433	246339
Q501J6	Probable ATP-dependent RNA helicase DDX17	Ddx17	122	7	1.321	0.496387	324970	172887	201182	228919	265782	301767
Q03265	ATP synthase subunit alpha, mitochondrial	Atp5f1a	365	24	1.319	0.0264555	1.78678e+07	1.46735e+07	1.55424e+07	2.02438e+07	2.05054e+07	2.49735e+07
P62852	40S ribosomal protein S25	Rps25	22	3	1.317	0.0082824	95935.1	93544.7	82497.7	118763	130312	123167
P31938	Dual specificity mitogen-activated protein kinase kinase 1	Map2k1	5	2	1.316	0.320358	227786	145481	102261	191515	190242	230722
P63323	40S ribosomal protein S12	Rps12	29	5	1.316	0.183219	1.19617e+06	815497	926791	1.04117e+06	1.21945e+06	1.52595e+06
P35979	60S ribosomal protein L12	Rpl12	98	6	1.315	0.209994	4.33401e+06	2.45629e+06	3.51662e+06	3.7252e+06	4.62498e+06	5.42404e+06
P80316	T-complex protein 1 subunit epsilon	Cct5	40	6	1.314	0.158984	818780	601257	606693	778108	797418	1.19089e+06
Q9CQV8	14-3-3 protein beta/alpha	Ywhab	109	4	1.313	0.0547344	875925	798176	655371	925694	1.04809e+06	1.14093e+06
P61079	Ubiquitin-conjugating enzyme E2 D3	Ube2d3	19	2	1.311	0.303918	656284	347574	480689	553580	630157	666466
P32883	GTPase KRas	Kras	38	3	1.309	0.205892	1.08448e+06	624145	828858	923650	1.08486e+06	1.40951e+06
Q99PT1	Rho GDP-dissociation inhibitor 1	Arhgdia	95	8	1.309	0.0465837	2.53326e+06	2.31646e+06	2.20363e+06	2.91552e+06	3.03159e+06	3.84124e+06
P52196	Thiosulfate sulfurtransferase	Tst	26	5	1.308	0.298874	403744	219337	529806	527972	616370	427821
Q8K0T0	Reticulon-1	Rtn1	39	5	1.306	0.443235	2.10552e+06	1.17411e+06	1.23376e+06	1.56257e+06	1.61168e+06	2.11058e+06
Q9CQQ7	ATP synthase F(0) complex subunit B1, mitochondrial	Atp5pb	18	5	1.305	0.0451927	502340	429969	565612	655408	605954	759186
Q9DCJ5	NADH dehydrogenase	Ndufa8	5	3	1.304	0.397583	327262	61213.9	177855	199349	231847	379226
P17225	Polypyrimidine tract-binding protein 1	Ptbp1	15	3	1.3	0.168565	281300	139962	293349	285181	365618	496688
P67778	Prohibitin 1	Phb1	47	7	1.299	0.119986	710848	667133	791113	766621	923189	1.06966e+06
P16858	Glyceraldehyde-3-phosphate dehydrogenase	Gapdh	492	16	1.297	0.288955	5.80998e+07	3.82404e+07	4.08774e+07	4.73894e+07	5.30155e+07	6.58991e+07
Q8BHG2	CXXC motif containing zinc binding protein	Czib	19	2	1.297	0.871598	162700	16188.3	75553.4	27975.9	97971.4	110742
Q62261	Spectrin beta chain, non-erythrocytic 1	Sptbn1	154	33	1.296	0.132038	2.28271e+06	2.55479e+06	1.73276e+06	3.05016e+06	2.49527e+06	2.95941e+06
Q8BGQ7	Alanine--tRNA ligase, cytoplasmic	Aars1	40	9	1.296	0.151686	634494	479690	447143	587221	621797	821471
Q9D394	Protein RUFY3	Rufy3	12	2	1.295	0.0468104	142695	116091	119829	149151	155186	172519
O55029	Coatomer subunit beta'	Copb2	7	3	1.294	0.028041	62106	49993.9	62577.6	93626.1	73134.9	80365.1
Q61548	Clathrin coat assembly protein AP180	Snap91	31	5	1.294	0.214002	482955	335458	363646	509806	439859	470510
P29341	Polyadenylate-binding protein 1	Pabpc1	27	6	1.293	0.0111911	410848	422829	371104	531104	498193	591866
P14211	Calreticulin	Calr	66	7	1.293	0.172042	1.82913e+06	1.13266e+06	1.44839e+06	1.75077e+06	1.87215e+06	2.10846e+06
Q62376	U1 small nuclear ribonucleoprotein 70 kDa	Snrnp70	8	2	1.292	0.124273	35846.2	77070.5	78705.4	96449.4	99584.3	144334
P58281	Dynamin-like 120 kDa protein, mitochondrial	Opa1	12	3	1.289	0.0994398	54861.2	49336.3	35339.5	63610	71403.5	63199.2
P63276	40S ribosomal protein S17	Rps17	5	2	1.288	0.193946	152471	177218	158788	204575	269230	168078
P62631	Elongation factor 1-alpha 2	Eef1a2	261	7	1.288	0.138621	1.43475e+06	1.88818e+06	1.97881e+06	2.4841e+06	2.43263e+06	1.87633e+06
Q8K3H0	DCC-interacting protein 13-alpha	Appl1	7	2	1.288	0.175044	85629	48832	65911	81337.2	84879.9	105078
O88809	Neuronal migration protein doublecortin	Dcx	46	5	1.287	0.540759	590239	218665	474890	308644	611193	722563
P26043	Radixin	Rdx	15	4	1.286	0.0339965	409085	394696	308212	484696	507693	613974
P70349	Adenosine 5'-monophosphoramidase HINT1	Hint1	16	2	1.285	0.400648	287886	143735	174170	223107	223799	280963
O89053	Coronin-1A	Coro1a	50	8	1.285	0.279945	740029	437612	515613	591348	662507	913278
Q922Q8	Leucine-rich repeat-containing protein 59	Lrrc59	15	3	1.283	0.754152	218360	118209	124092	118151	159196	223370
O70492	Sorting nexin-3	Snx3	33	4	1.281	0.152613	583870	441257	440893	554224	565455	772076
P50247	Adenosylhomocysteinase	Ahcy	38	8	1.281	0.215191	1.41553e+06	883269	1.09533e+06	1.20198e+06	1.4034e+06	1.8144e+06
Q08331	Calretinin	Calb2	33	3	1.281	0.279749	201391	143496	139821	206114	178484	183748
P09671	Superoxide dismutase	Sod2	14	3	1.28	0.299907	332803	260874	438638	425977	459216	364627
P46460	Vesicle-fusing ATPase	Nsf	163	22	1.28	0.0596852	2.95743e+06	3.07091e+06	2.3366e+06	3.89852e+06	3.78469e+06	3.39181e+06
Q68FD5	Clathrin heavy chain 1	Cltc	546	56	1.279	0.0509443	1.41412e+07	1.31732e+07	1.13132e+07	1.68525e+07	1.47099e+07	1.71128e+07
P62827	GTP-binding nuclear protein Ran	Ran	128	8	1.279	0.123362	4.51289e+06	2.88519e+06	4.10397e+06	4.77422e+06	5.25002e+06	5.72635e+06
Q01853	Transitional endoplasmic reticulum ATPase	Vcp	288	32	1.278	0.152129	7.26187e+06	5.20904e+06	5.68086e+06	6.68156e+06	7.2583e+06	9.01755e+06
P97461	40S ribosomal protein S5	Rps5	33	5	1.276	0.98813	219785	31031.6	81779.3	222131	25056.8	104359
P27546	Microtubule-associated protein 4	Map4	13	4	1.275	0.450405	535048	345682	320874	391675	440813	558883
P60766	Cell division control protein 42 homolog	Cdc42	92	5	1.274	0.204694	2.19646e+06	1.5e+06	1.78976e+06	1.98012e+06	2.37982e+06	2.281e+06
P10922	Histone H1.0	H1-0	5	2	1.274	0.179638	115298	71962.1	129946	129039	146881	164262
Q9D0E1	Heterogeneous nuclear ribonucleoprotein M	Hnrnpm	73	9	1.273	0.211445	1.74028e+06	1.21116e+06	1.38058e+06	1.50474e+06	1.75811e+06	2.03985e+06
Q9DBJ1	Phosphoglycerate mutase 1	Pgam1	150	12	1.273	0.29393	5.59253e+06	3.79077e+06	4.45294e+06	4.53039e+06	5.66815e+06	6.33148e+06
Q9EQF6	Dihydropyrimidinase-related protein 5	Dpysl5	171	17	1.272	0.0305937	2.85795e+06	2.65513e+06	2.41931e+06	3.37789e+06	3.16073e+06	3.93644e+06
P18872	Guanine nucleotide-binding protein G(o) subunit alpha	Gnao1	194	11	1.269	0.21792	1.138e+07	9.43295e+06	7.36278e+06	1.01515e+07	1.19725e+07	1.26095e+07
Q9Z1G3	V-type proton ATPase subunit C 1	Atp6v1c1	28	5	1.268	0.353044	1.14373e+06	578226	787309	934321	998627	1.13576e+06
P46660	Alpha-internexin	Ina	225	18	1.268	0.225816	5.84111e+06	4.26387e+06	4.39557e+06	5.1964e+06	5.57242e+06	8.48457e+06
Q04447	Creatine kinase B-type	Ckb	430	17	1.267	0.106482	2.91609e+07	3.04147e+07	3.35361e+07	3.90606e+07	3.21749e+07	3.85419e+07
Q9D1E6	Tubulin-folding cofactor B	Tbcb	8	4	1.267	0.398199	177731	114170	136473	129851	172905	213264
P12658	Calbindin	Calb1	126	12	1.267	0.2779	5.36855e+06	3.50426e+06	4.46455e+06	5.65577e+06	4.49876e+06	5.84819e+06
Q64436	Potassium-transporting ATPase alpha chain 1	Atp4a	132	2	1.267	0.00718377	1.04433e+06	1.02578e+06	949409	1.29941e+06	1.27161e+06	1.45811e+06
Q8BGH2	Sorting and assembly machinery component 50 homolog	Samm50	14	4	1.267	0.753267	164663	82495.9	96062.2	123602	63967.5	121679
Q62277	Synaptophysin	Syp	44	2	1.265	0.0179267	1.57855e+06	1.46651e+06	1.3511e+06	1.85514e+06	1.79711e+06	2.13717e+06
Q9CRY7	Lysophospholipase D GDPD1	Gdpd1	21	2	1.265	0.314735	174080	99554.8	140919	139825	178256	192173
P62814	V-type proton ATPase subunit B, brain isoform	Atp6v1b2	127	17	1.264	0.0704445	1.69558e+06	1.44451e+06	1.33756e+06	1.82575e+06	1.72598e+06	2.21145e+06
P56382	ATP synthase subunit epsilon, mitochondrial	Atp5f1e	3	2	1.264	0.0449775	142855	113796	132088	164673	166921	176361
P42669	Transcriptional activator protein Pur-alpha	Pura	20	3	1.263	0.156026	290775	219884	241672	305290	273334	312081
Q6PIE5	Sodium/potassium-transporting ATPase subunit alpha-2	Atp1a2	670	21	1.262	0.14529	9.74203e+06	1.12027e+07	7.24885e+06	1.28887e+07	1.21093e+07	1.22933e+07
Q91Z67	SLIT-ROBO Rho GTPase-activating protein 2	Srgap2	20	7	1.262	0.0951153	117855	108070	76670.9	136331	129631	212082
P62874	Guanine nucleotide-binding protein G(I)/G(S)/G(T) subunit beta-1	Gnb1	173	6	1.261	0.353177	8.62485e+06	4.85227e+06	6.09465e+06	6.70328e+06	7.68688e+06	9.24594e+06
P61294	Ras-related protein Rab-6B	Rab6b	20	3	1.261	0.176206	486493	290816	453735	472109	572068	619715
Q9D358	Low molecular weight phosphotyrosine protein phosphatase	Acp1	16	3	1.26	0.187883	441731	372576	270873	462331	469278	478212
Q9D6F9	Tubulin beta-4A chain	Tubb4a	1352	5	1.259	0.240314	2.55823e+06	2.24102e+06	3.58198e+06	3.22025e+06	3.1958e+06	3.96978e+06
P21279	Guanine nucleotide-binding protein G(q) subunit alpha	Gnaq	16	3	1.258	0.043424	606848	517377	498812	647767	650928	773533
P14873	Microtubule-associated protein 1B	Map1b	99	20	1.257	0.342006	3.06726e+06	1.66671e+06	2.2579e+06	2.42101e+06	2.83887e+06	3.27158e+06
P00405	Cytochrome c oxidase subunit 2	Mtco2	85	4	1.257	0.138177	5.42141e+06	5.58728e+06	6.83014e+06	6.59197e+06	7.02169e+06	7.32094e+06
P60843	Eukaryotic initiation factor 4A-I	Eif4a1	132	7	1.256	0.089229	2.66124e+06	2.32797e+06	2.80948e+06	3.01054e+06	3.34381e+06	4.36161e+06
Q61701	ELAV-like protein 4	Elavl4	59	2	1.256	0.31019	1.25734e+06	587740	1.00629e+06	1.02859e+06	1.26435e+06	1.42951e+06
P11983	T-complex protein 1 subunit alpha	Tcp1	57	10	1.256	0.0604052	954985	743280	851889	1.03644e+06	1.06988e+06	1.38816e+06
Q6PHZ2	Calcium/calmodulin-dependent protein kinase type II subunit delta	Camk2d	79	3	1.255	0.160283	649544	569472	349055	875075	714588	675392
O55023	Inositol monophosphatase 1	Impa1	47	8	1.253	0.430288	1.27775e+06	451654	905450	864792	1.33674e+06	1.13432e+06
Q8R081	Heterogeneous nuclear ribonucleoprotein L	Hnrnpl	86	10	1.252	0.275844	3.2091e+06	1.68103e+06	2.12665e+06	2.66354e+06	2.62172e+06	4.08588e+06
P46096	Synaptotagmin-1	Syt1	32	5	1.252	0.389738	378317	520894	399043	499717	430532	512357
Q6PER3	Microtubule-associated protein RP/EB family member 3	Mapre3	15	2	1.251	0.195834	283290	187874	226757	283622	254206	329883
Q8C1A5	Thimet oligopeptidase	Thop1	9	4	1.249	0.350891	166283	115040	63440.4	124063	143628	191312
Q9CWZ7	Gamma-soluble NSF attachment protein	Napg	39	6	1.246	0.437887	767223	428684	548178	531666	682892	887191
P56399	Ubiquitin carboxyl-terminal hydrolase 5	Usp5	98	11	1.246	0.135231	1.10087e+06	939531	768916	1.17034e+06	1.04244e+06	1.48103e+06
Q8C854	Myelin expression factor 2	Myef2	29	7	1.245	0.361185	705058	433995	460009	572613	537534	961124
P14148	60S ribosomal protein L7	Rpl7	29	5	1.244	0.0860198	544757	396071	486857	556171	605744	697280
O70133	ATP-dependent RNA helicase A	Dhx9	120	18	1.244	0.264888	2.04724e+06	1.45112e+06	1.52749e+06	1.90047e+06	1.73489e+06	2.67322e+06
P14869	60S acidic ribosomal protein P0	Rplp0	62	8	1.243	0.114497	1.19865e+06	833712	964370	1.19282e+06	1.1988e+06	1.53527e+06
P17710	Hexokinase-1	Hk1	225	25	1.243	0.259815	8.65474e+06	6.73993e+06	4.58259e+06	8.37499e+06	8.35307e+06	9.03401e+06
Q9D6R2	Isocitrate dehydrogenase	Idh3a	63	9	1.242	0.39964	1.70991e+06	1.16648e+06	1.19284e+06	1.48148e+06	1.40711e+06	1.71346e+06
O88844	Isocitrate dehydrogenase	Idh1	129	12	1.24	0.320697	3.89869e+06	2.32499e+06	2.90076e+06	3.10222e+06	3.59756e+06	4.4115e+06
P02088	Hemoglobin subunit beta-1	Hbb-b1	182	10	1.239	0.261099	2.02192e+07	1.04325e+07	1.40467e+07	1.72805e+07	1.74021e+07	2.43887e+07
Q3ULJ0	Glycerol-3-phosphate dehydrogenase 1-like protein	Gpd1l	9	4	1.235	0.0565097	127588	114352	99821.2	164388	133678	141170
Q8VIJ6	Splicing factor, proline- and glutamine-rich	Sfpq	67	7	1.234	0.0820855	1.40915e+06	1.06606e+06	1.24262e+06	1.53395e+06	1.42787e+06	1.72869e+06
Q61166	Microtubule-associated protein RP/EB family member 1	Mapre1	36	4	1.234	0.62646	509589	542892	411609	628968	382564	643785
O35593	26S proteasome non-ATPase regulatory subunit 14	Psmd14	9	2	1.234	0.215816	27195.8	67079.7	79226.2	81937.2	82759.1	121664
Q8R0Y6	Cytosolic 10-formyltetrahydrofolate dehydrogenase	Aldh1l1	194	23	1.233	0.076373	3.34318e+06	2.87622e+06	2.83598e+06	3.46899e+06	3.54732e+06	4.40282e+06
Q8C8R3	Ankyrin-2	Ank2	28	10	1.232	0.374562	295994	258572	155809	318445	222021	348579
Q8K1M6	Dynamin-1-like protein	Dnm1l	32	8	1.229	0.117377	434749	454830	389993	534456	445267	584122
Q6PIC6	Sodium/potassium-transporting ATPase subunit alpha-3	Atp1a3	869	26	1.229	0.121508	5.73598e+07	5.29768e+07	3.91588e+07	6.5126e+07	6.32553e+07	6.94552e+07
P16125	L-lactate dehydrogenase B chain	Ldhb	176	11	1.228	0.274083	1.73107e+07	1.06061e+07	1.4402e+07	1.45692e+07	1.76896e+07	1.98796e+07
P99029	Peroxiredoxin-5, mitochondrial	Prdx5	82	10	1.223	0.289022	2.99788e+06	1.94611e+06	3.17515e+06	2.72195e+06	3.71499e+06	3.66565e+06
Q9EQ20	Methylmalonate-semialdehyde dehydrogenase	Aldh6a1	7	5	1.222	0.0834441	185724	181968	216092	226967	221606	280903
P30275	Creatine kinase U-type, mitochondrial	Ckmt1	140	12	1.22	0.113534	4.07681e+06	3.2865e+06	4.30926e+06	4.21407e+06	4.97365e+06	5.33107e+06
P14733	Lamin-B1	Lmnb1	177	23	1.217	0.123325	4.59635e+06	4.28394e+06	4.37224e+06	5.32078e+06	5.14516e+06	7.29729e+06
Q6PDM2	Serine/arginine-rich splicing factor 1	Srsf1	6	2	1.217	0.0355633	118697	96946.2	112765	137203	130842	150183
Q9Z1N5	Spliceosome RNA helicase Ddx39b	Ddx39b	113	12	1.216	0.144988	5.74298e+06	4.08721e+06	4.61291e+06	5.60902e+06	5.50267e+06	7.26251e+06
P70202	Latexin	Lxn	55	4	1.215	0.436142	4.58683e+06	931112	2.8342e+06	2.89526e+06	3.44354e+06	4.8384e+06
Q99LC5	Electron transfer flavoprotein subunit alpha, mitochondrial	Etfa	19	4	1.215	0.284306	212265	81874.9	214512	171602	257867	362643
Q9D819	Inorganic pyrophosphatase	Ppa1	15	3	1.214	0.406378	259609	92569.8	193731	163963	235263	348009
Q8C0M9	Isoaspartyl peptidase/L-asparaginase	Asrgl1	69	10	1.213	0.494289	3.03178e+06	1.35347e+06	2.26868e+06	1.98449e+06	2.75215e+06	3.21257e+06
P02301	Histone H3.3C	H3-5	98	5	1.21	0.25016	4.26421e+07	2.55364e+07	4.49974e+07	3.77205e+07	5.16053e+07	7.02913e+07
Q922B2	Aspartate--tRNA ligase, cytoplasmic	Dars1	47	14	1.21	0.292891	2.45012e+06	4.68917e+06	3.83194e+06	4.86586e+06	4.6368e+06	4.39188e+06
Q9DCX2	ATP synthase subunit d, mitochondrial	Atp5pd	48	5	1.209	0.13888	849771	870388	833909	1.02771e+06	926766	1.28395e+06
Q9CQ60	6-phosphogluconolactonase	Pgls	17	3	1.209	0.453642	228404	130777	188664	171490	234669	228021
Q9R0P5	Destrin	Dstn	70	8	1.206	0.520369	4.04298e+06	1.96528e+06	2.70266e+06	2.91838e+06	3.25868e+06	3.69577e+06
Q91VD9	NADH-ubiquinone oxidoreductase 75 kDa subunit, mitochondrial	Ndufs1	102	19	1.205	0.254782	2.56231e+06	1.97301e+06	1.44959e+06	2.37831e+06	2.25064e+06	2.99526e+06
Q8BHN3	Neutral alpha-glucosidase AB	Ganab	22	8	1.205	0.149835	260856	222936	179408	250022	268573	369935
O09131	Glutathione S-transferase omega-1	Gsto1	15	4	1.203	0.34444	338591	73046	292137	281140	351575	441498
P47757	F-actin-capping protein subunit beta	Capzb	65	7	1.203	0.386574	1.52675e+06	891594	1.07129e+06	1.21095e+06	1.28898e+06	1.60696e+06
Q9QYC0	Alpha-adducin	Add1	59	10	1.203	0.060171	759954	727387	584429	875128	827551	1.06393e+06
Q9Z2X1	Heterogeneous nuclear ribonucleoprotein F	Hnrnpf	55	7	1.203	0.119677	2.10284e+06	1.60842e+06	1.85081e+06	2.16707e+06	2.2263e+06	3.14886e+06
P97807	Fumarate hydratase, mitochondrial	Fh	17	5	1.199	0.143571	518580	448203	341595	537237	504053	700109
Q9CQI6	Coactosin-like protein	Cotl1	50	5	1.197	0.329536	1.74233e+06	639474	1.36584e+06	1.63433e+06	1.61508e+06	1.8312e+06
Q76MZ3	Serine/threonine-protein phosphatase 2A 65 kDa regulatory subunit A alpha isoform	Ppp2r1a	180	17	1.194	0.128412	4.51047e+06	3.52742e+06	3.73969e+06	4.46544e+06	4.45602e+06	5.79978e+06
Q9WVA3	Mitotic checkpoint protein BUB3	Bub3	21	4	1.193	0.298432	228912	120868	173869	193500	207417	261638
Q63810	Calcineurin subunit B type 1	Ppp3r1	4	2	1.19	0.110706	28344.8	25323.6	30653.2	41451.4	33732	30781.6
Q8VDQ8	NAD-dependent protein deacetylase sirtuin-2	Sirt2	42	7	1.189	0.384146	1.70413e+06	1.31427e+06	1.1631e+06	1.51668e+06	1.59711e+06	1.56238e+06
Q8R016	Bleomycin hydrolase	Blmh	10	4	1.187	0.437829	340206	521477	161154	478989	403989	398292
P10649	Glutathione S-transferase Mu 1	Gstm1	52	7	1.186	0.152785	1.23385e+06	1.02398e+06	1.37865e+06	1.43491e+06	1.463e+06	1.48618e+06
Q99LD8	N(G),N(G)-dimethylarginine dimethylaminohydrolase 2	Ddah2	73	7	1.184	0.523878	1.86947e+06	999238	1.50862e+06	1.25966e+06	1.78582e+06	2.04945e+06
O88643	Serine/threonine-protein kinase PAK 1	Pak1	12	2	1.183	0.737993	121455	118419	168393	143719	119280	165730
P63038	60 kDa heat shock protein, mitochondrial	Hspd1	97	18	1.182	0.0984433	2.06143e+06	2.29734e+06	1.95602e+06	2.43672e+06	2.23708e+06	2.49936e+06
Q99104	Unconventional myosin-Va	Myo5a	5	2	1.182	0.132823	46094.9	48617	36659.4	66449.3	47504.3	54485.1
P68404	Protein kinase C beta type	Prkcb	15	4	1.181	0.395492	397291	164470	263173	310754	283429	465981
Q9Z2W0	Aspartyl aminopeptidase	Dnpep	9	4	1.181	0.487717	60911.3	89899.5	59478.4	71909.5	61062.5	169196
P61089	Ubiquitin-conjugating enzyme E2 N	Ube2n	22	3	1.178	0.191626	317777	548724	500281	554228	589352	693245
Q9CPW4	Actin-related protein 2/3 complex subunit 5	Arpc5	19	3	1.178	0.224868	533725	285254	436947	514591	512880	1.36274e+06
Q99JY9	Actin-related protein 3	Actr3	73	11	1.177	0.259823	1.48172e+06	1.13543e+06	1.13821e+06	1.33911e+06	1.33877e+06	1.78866e+06
Q9JHU4	Cytoplasmic dynein 1 heavy chain 1	Dync1h1	280	63	1.176	0.0972284	5.10689e+06	5.10435e+06	3.96058e+06	6.00453e+06	5.38441e+06	6.3107e+06
Q8BMF4	Dihydrolipoyllysine-residue acetyltransferase component of pyruvate dehydrogenase complex, mitochondrial	Dlat	46	9	1.176	0.110225	892588	948804	670773	1.04642e+06	1.04987e+06	1.18046e+06
P68369	Tubulin alpha-1A chain	Tuba1a	973	5	1.176	0.166851	1.8562e+08	1.36151e+08	1.60246e+08	1.73659e+08	1.8847e+08	2.2911e+08
P53026	60S ribosomal protein L10a	Rpl10a	22	5	1.175	0.732401	1.29455e+06	648748	781122	917818	756307	1.25128e+06
P42932	T-complex protein 1 subunit theta	Cct8	132	16	1.174	0.13734	2.53905e+06	2.10154e+06	2.28281e+06	2.52425e+06	2.68016e+06	3.43933e+06
Q9D2G2	Dihydrolipoyllysine-residue succinyltransferase component of 2-oxoglutarate dehydrogenase complex, mitochondrial	Dlst	30	4	1.173	0.108102	638525	580442	515234	680772	662386	697823
Q921M3	Splicing factor 3B subunit 3	Sf3b3	15	5	1.172	0.541004	179338	52442.2	101616	119144	95959.4	194129
O35737	Heterogeneous nuclear ribonucleoprotein H	Hnrnph1	98	7	1.171	0.162385	1.7206e+06	1.60577e+06	1.49618e+06	1.88055e+06	1.6545e+06	2.17752e+06
Q9D0M5	Dynein light chain 2, cytoplasmic	Dynll2	47	2	1.171	0.285746	1.31313e+06	732638	1.31241e+06	1.10098e+06	1.53693e+06	1.89207e+06
P08113	Endoplasmin	Hsp90b1	121	15	1.171	0.211613	1.1271e+06	1.05424e+06	1.18604e+06	1.31987e+06	1.16678e+06	1.76921e+06
O88712	C-terminal-binding protein 1	Ctbp1	31	4	1.171	0.346857	143155	64589.3	122289	143180	107877	190152
Q9DCD0	6-phosphogluconate dehydrogenase, decarboxylating	Pgd	42	6	1.17	0.0733481	640567	643508	552156	749735	747752	1.00882e+06
P18760	Cofilin-1	Cfl1	157	11	1.169	0.286414	8.70076e+06	6.86612e+06	9.6589e+06	8.63237e+06	1.02477e+07	1.01719e+07
Q62188	Dihydropyrimidinase-related protein 3	Dpysl3	313	11	1.167	0.394592	5.32532e+06	3.67634e+06	4.38808e+06	4.28646e+06	5.12023e+06	5.84364e+06
C0HKE3	Histone H2A type 1-D	H2ac7	89	6	1.163	0.253607	7.49806e+06	9.31165e+06	6.91994e+06	8.3385e+06	1.2298e+07	8.71731e+06
Q9CR68	Cytochrome b-c1 complex subunit Rieske, mitochondrial	Uqcrfs1	16	3	1.163	0.368883	374051	293053	268676	340689	320942	383765
Q61753	D-3-phosphoglycerate dehydrogenase	Phgdh	128	12	1.16	0.353485	3.68421e+06	2.47593e+06	2.92975e+06	3.39719e+06	2.94983e+06	4.72635e+06
Q60900	ELAV-like protein 3	Elavl3	74	4	1.159	0.180031	435667	245080	445181	463482	504788	640193
P62746	Rho-related GTP-binding protein RhoB	Rhob	53	4	1.158	0.232667	435922	249169	355871	399311	412157	540659
P28651	Carbonic anhydrase-related protein	Ca8	104	8	1.158	0.187223	3.82526e+06	2.4204e+06	3.23691e+06	3.64907e+06	3.74859e+06	4.82407e+06
Q9QYF9	Protein NDRG3	Ndrg3	36	5	1.158	0.917286	2.77317e+06	1.27736e+06	1.12261e+06	1.29527e+06	1.47897e+06	1.87141e+06
Q3TXX4	Vesicular glutamate transporter 1	Slc17a7	13	2	1.155	0.217879	123290	74491.4	127528	142390	117897	181394
P80313	T-complex protein 1 subunit eta	Cct7	62	10	1.154	0.462636	2.25769e+06	1.16554e+06	1.5382e+06	1.708e+06	1.77479e+06	2.2887e+06
Q8QZS1	3-hydroxyisobutyryl-CoA hydrolase, mitochondrial	Hibch	6	3	1.152	0.309918	115285	95089	26561.3	106980	109532	159019
P63328	Protein phosphatase 3 catalytic subunit alpha	Ppp3ca	89	6	1.152	0.183482	2.86087e+06	2.36056e+06	2.39469e+06	2.7582e+06	2.75349e+06	3.53296e+06
Q8BGN8	Synaptoporin	Synpr	11	2	1.15	0.302854	115252	57677	136392	132546	112935	183704
P70372	ELAV-like protein 1	Elavl1	68	9	1.148	0.220022	1.50283e+06	1.02384e+06	1.25507e+06	1.3838e+06	1.44044e+06	2.20881e+06
P84104	Serine/arginine-rich splicing factor 3	Srsf3	11	2	1.147	0.282729	239588	145582	227932	202018	261347	337888
Q9DB05	Alpha-soluble NSF attachment protein	Napa	24	2	1.146	0.95987	223449	138035	148718	130329	170440	200117
Q9CX56	26S proteasome non-ATPase regulatory subunit 8	Psmd8	4	2	1.145	0.324213	233497	200491	72212	229470	226573	271810
Q91YT0	NADH dehydrogenase	Ndufv1	55	11	1.14	0.287637	1.36615e+06	1.48402e+06	932700	1.24564e+06	2.07951e+06	1.55737e+06
Q99MR8	Methylcrotonoyl-CoA carboxylase subunit alpha, mitochondrial	Mccc1	750	38	1.138	0.725713	4.77036e+07	3.70496e+07	3.69782e+07	4.21632e+07	4.62802e+07	3.76761e+07
Q9CZD3	Glycine--tRNA ligase	Gars1	13	5	1.136	0.878295	64259.8	67841.3	55219.9	77797.9	73025.3	46296.2
O08553	Dihydropyrimidinase-related protein 2	Dpysl2	599	20	1.136	0.248866	2.65052e+07	1.95855e+07	2.27078e+07	2.3788e+07	2.58053e+07	3.05617e+07
P62264	40S ribosomal protein S14	Rps14	20	2	1.135	0.471289	439365	268666	335593	321730	380864	521645
P63017	Heat shock cognate 71 kDa protein	Hspa8	697	23	1.134	0.2376	4.99834e+07	3.28673e+07	4.32584e+07	4.51138e+07	4.90557e+07	6.13781e+07
Q80XN0	D-beta-hydroxybutyrate dehydrogenase, mitochondrial	Bdh1	140	12	1.133	0.157988	3.95238e+06	2.43833e+06	3.67675e+06	4.1658e+06	4.13177e+06	5.34803e+06
P99024	Tubulin beta-5 chain	Tubb5	1640	5	1.131	0.195489	2.14081e+07	1.63342e+07	2.1536e+07	2.03311e+07	2.42194e+07	2.85874e+07
O35098	Dihydropyrimidinase-related protein 4	Dpysl4	158	17	1.131	0.248104	2.99776e+06	2.44526e+06	2.54224e+06	2.79452e+06	2.87411e+06	3.8752e+06
Q8CAQ8	MICOS complex subunit Mic60	Immt	26	10	1.13	0.269598	630822	554142	538048	626199	579780	656405
Q9Z1Q5	Chloride intracellular channel protein 1	Clic1	7	2	1.128	0.386643	89030.9	40020	73642.3	66079.7	83038	111809
P61161	Actin-related protein 2	Actr2	5	2	1.127	0.374756	87690.7	101529	93092.1	104936	89351.8	163944
P62245	40S ribosomal protein S15a	Rps15a	82	8	1.125	0.471379	3.18928e+06	1.82713e+06	2.75813e+06	2.41803e+06	3.10314e+06	3.46149e+06
P20029	Endoplasmic reticulum chaperone BiP	Hspa5	159	16	1.122	0.340952	2.22757e+06	1.82347e+06	1.9189e+06	1.95873e+06	2.15396e+06	2.49857e+06
Q99LC3	NADH dehydrogenase	Ndufa10	11	3	1.122	0.353924	414935	149647	329798	370112	341719	494090
Q9Z0E0	Neurochondrin	Ncdn	81	13	1.122	0.230035	3.34877e+06	4.49452e+06	3.90452e+06	4.38097e+06	5.12392e+06	4.13692e+06
P63242	Eukaryotic translation initiation factor 5A-1	Eif5a	20	2	1.121	0.372829	976127	416073	721611	711397	809114	1.31111e+06
P62141	Serine/threonine-protein phosphatase PP1-beta catalytic subunit	Ppp1cb	60	2	1.121	0.78131	308493	281067	341431	345897	122556	472891
P63101	14-3-3 protein zeta/delta	Ywhaz	203	13	1.119	0.353373	2.1726e+07	1.27376e+07	1.79168e+07	1.87603e+07	2.00525e+07	2.32388e+07
P51150	Ras-related protein Rab-7a	Rab7a	51	8	1.119	0.623872	1.85325e+06	569642	1.34691e+06	1.15026e+06	1.50689e+06	1.51772e+06
Q80Y17	Lethal(2) giant larvae protein homolog 1	Llgl1	23	5	1.117	0.390547	96554.3	64159.9	37234.6	67923.2	71693.2	129182
P21107	Tropomyosin alpha-3 chain	Tpm3	12	3	1.117	0.6474	367933	283646	254245	247669	316877	467493
Q61879	Myosin-10	Myh10	30	11	1.117	0.429213	520669	439577	461747	515836	446610	598079
Q91YR1	Twinfilin-1	Twf1	8	2	1.117	0.401482	120855	163876	95912.7	133878	134955	177004
P15864	Histone H1.2	H1-2	103	3	1.117	0.277942	6.77243e+06	3.36724e+06	7.0404e+06	6.45238e+06	7.56145e+06	9.52644e+06
P50396	Rab GDP dissociation inhibitor alpha	Gdi1	200	15	1.116	0.189498	6.7908e+06	5.83763e+06	5.94151e+06	6.50716e+06	6.6314e+06	7.81042e+06
P61979	Heterogeneous nuclear ribonucleoprotein K	Hnrnpk	151	14	1.116	0.248742	6.25439e+06	4.09649e+06	5.26898e+06	5.6196e+06	5.87921e+06	7.96347e+06
Q9CWS0	N(G),N(G)-dimethylarginine dimethylaminohydrolase 1	Ddah1	35	3	1.114	0.388769	272658	141990	224472	213307	249990	319257
P62259	14-3-3 protein epsilon	Ywhae	179	12	1.112	0.218193	3.14093e+06	2.89132e+06	3.0964e+06	3.44384e+06	3.08422e+06	4.13091e+06
P60122	RuvB-like 1	Ruvbl1	19	4	1.111	0.213787	144669	105279	141471	135184	157224	195524
Q9QY76	Vesicle-associated membrane protein-associated protein B	Vapb	23	2	1.111	0.96716	434638	333744	353137	392240	222094	565610
P70296	Phosphatidylethanolamine-binding protein 1	Pebp1	138	10	1.111	0.385172	6.21661e+06	3.6437e+06	5.45672e+06	4.95168e+06	6.05978e+06	7.40696e+06
O88569	Heterogeneous nuclear ribonucleoproteins A2/B1	Hnrnpa2b1	103	14	1.106	0.795237	3.50234e+06	2.94296e+06	4.25107e+06	3.87526e+06	2.89714e+06	4.48474e+06
Q99K85	Phosphoserine aminotransferase	Psat1	23	5	1.105	0.417774	498946	344762	436588	392598	482613	656928
P17751	Triosephosphate isomerase	Tpi1	153	16	1.105	0.575108	7.6608e+06	1.09485e+07	7.53901e+06	1.46576e+07	8.46825e+06	7.83777e+06
Q80TB8	Synaptic vesicle membrane protein VAT-1 homolog-like	Vat1l	5	2	1.103	0.201097	129042	100701	114360	141283	126156	124087
P43276	Histone H1.5	H1-5	43	5	1.102	0.446177	790462	138043	995292	708960	871350	1.02575e+06
Q91WJ8	Far upstream element-binding protein 1	Fubp1	22	5	1.098	0.296879	326542	288880	227005	317306	285017	403450
Q91WD5	NADH dehydrogenase	Ndufs2	37	8	1.092	0.0538615	556927	538675	503922	588009	570246	627340
P05063	Fructose-bisphosphate aldolase C	Aldoc	377	22	1.086	0.226909	1.61423e+07	1.21846e+07	1.55533e+07	1.68836e+07	1.64507e+07	1.73218e+07
P15532	Nucleoside diphosphate kinase A	Nme1	94	3	1.085	0.969203	7.18663e+06	3.87066e+06	4.83653e+06	3.52286e+06	5.24798e+06	7.53741e+06
P06801	NADP-dependent malic enzyme	Me1	25	2	1.08	0.35776	116535	76795.6	92322	99688.5	99652.9	137896
Q8K310	Matrin-3	Matr3	101	18	1.077	0.515666	3.25494e+06	2.01216e+06	2.43545e+06	2.50642e+06	2.62309e+06	3.55325e+06
P17183	Gamma-enolase	Eno2	113	7	1.075	0.368104	1.49212e+06	1.49232e+06	1.32818e+06	1.60379e+06	1.64032e+06	1.38033e+06
Q9DB20	ATP synthase subunit O, mitochondrial	Atp5po	128	8	1.074	0.847071	6.4272e+06	7.19888e+06	7.94883e+06	5.60194e+06	9.42539e+06	7.73092e+06
Q62186	Translocon-associated protein subunit delta	Ssr4	16	2	1.073	0.442347	333181	67389.3	275527	260356	295617	338886
Q08943	FACT complex subunit SSRP1	Ssrp1	2	2	1.07	0.520921	49494	38473.9	37418.8	41180.6	9816.41	52321.3
Q5SWU9	Acetyl-CoA carboxylase 1	Acaca	734	68	1.07	0.584655	3.07129e+07	2.69366e+07	2.71589e+07	2.9062e+07	2.97035e+07	2.04993e+07
P19246	Neurofilament heavy polypeptide	Nefh	61	3	1.065	0.304757	163482	101493	161394	257192	140253	171866
Q61206	Platelet-activating factor acetylhydrolase IB subunit alpha2	Pafah1b2	15	2	1.062	0.371155	551950	370983	569406	586229	620340	517317
Q9DB77	Cytochrome b-c1 complex subunit 2, mitochondrial	Uqcrc2	103	16	1.06	0.895472	2.55326e+06	2.28317e+06	2.32045e+06	1.87747e+06	2.45888e+06	2.77897e+06
Q61029	Lamina-associated polypeptide 2, isoforms beta/delta/epsilon/gamma	Tmpo	27	6	1.059	0.482787	398144	264320	349236	298888	369744	556571
Q9Z2U0	Proteasome subunit alpha type-7	Psma7	23	5	1.058	0.930374	380853	736151	296695	402779	314370	598795
Q9CQC9	GTP-binding protein SAR1b	Sar1b	28	2	1.054	0.481982	190673	101804	204227	150903	201043	242385
O35381	Acidic leucine-rich nuclear phosphoprotein 32 family member A	Anp32a	30	3	1.05	0.279577	1.186e+06	869717	1.16971e+06	1.2279e+06	1.08907e+06	1.57229e+06
Q61171	Peroxiredoxin-2	Prdx2	273	11	1.048	0.418093	2.70416e+07	1.9323e+07	2.96357e+07	2.51925e+07	2.8352e+07	3.3029e+07
P63073	Eukaryotic translation initiation factor 4E	Eif4e	6	2	1.048	0.66404	163161	69372.6	137685	102837	144350	160304
Q9QYR6	Microtubule-associated protein 1A	Map1a	59	13	1.048	0.406172	380521	363640	243196	419074	380999	333288
Q60597	2-oxoglutarate dehydrogenase complex component E1	Ogdh	68	9	1.047	0.521585	1.03087e+06	886533	589593	928361	822410	1.05205e+06
P09405	Nucleolin	Ncl	11	2	1.045	0.261154	162515	96030.1	148805	155571	151798	219278
O09061	Proteasome subunit beta type-1	Psmb1	16	2	1.044	0.901196	290785	558236	361449	318334	377409	538670
Q11136	Xaa-Pro dipeptidase	Pepd	10	3	1.042	0.757583	132672	54422.6	92681	85653.8	96560	106915
P05202	Aspartate aminotransferase, mitochondrial	Got2	188	17	1.041	0.398339	7.64873e+06	5.33265e+06	6.95645e+06	7.24202e+06	8.18293e+06	6.83641e+06
Q9QUI0	Transforming protein RhoA	Rhoa	136	8	1.041	0.442935	5.62633e+06	3.06732e+06	5.52981e+06	4.57389e+06	5.75679e+06	6.5774e+06
Q91ZA3	Propionyl-CoA carboxylase alpha chain, mitochondrial	Pcca	1561	49	1.04	0.370877	1.58848e+08	1.41766e+08	1.44911e+08	1.49977e+08	1.69921e+08	1.50682e+08
Q6IR34	G-protein-signaling modulator 1	Gpsm1	3	2	1.038	0.329821	70050.4	53400	71130.5	72729.9	63727	108649
Q9QUM9	Proteasome subunit alpha type-6	Psma6	12	3	1.036	0.917782	228193	421252	280383	290433	228431	443292
Q61937	Nucleophosmin	Npm1	11	2	1.035	0.499105	197756	76276.5	156389	137780	161817	220821
P63085	Mitogen-activated protein kinase 1	Mapk1	55	5	1.034	0.354131	594003	503777	609307	614368	555700	797434
Q02248	Catenin beta-1	Ctnnb1	28	6	1.033	0.45567	132088	139113	99141.1	139969	127763	136419
Q99020	Heterogeneous nuclear ribonucleoprotein A/B	Hnrnpab	51	3	1.032	0.408071	2.28167e+06	1.33252e+06	2.12283e+06	1.92243e+06	2.19144e+06	2.66144e+06
Q9CZN7	Serine hydroxymethyltransferase, mitochondrial	Shmt2	21	6	1.031	0.518269	328751	199850	282056	265911	290937	344209
P23198	Chromobox protein homolog 3	Cbx3	22	3	1.031	0.523407	608923	320919	483452	431963	498566	734487
Q9R1Q8	Transgelin-3	Tagln3	66	9	1.03	0.439188	1.92396e+06	1.21524e+06	1.79118e+06	1.65987e+06	1.84498e+06	2.08965e+06
Q8K0S0	Phytanoyl-CoA hydroxylase-interacting protein	Phyhip	39	3	1.028	0.517529	252730	238016	275241	241372	259893	336828
Q3THS6	S-adenosylmethionine synthase isoform type-2	Mat2a	14	2	1.027	0.470972	190032	130298	174165	157407	178794	218943
Q9ERK4	Exportin-2	Cse1l	12	5	1.024	0.436628	78150.1	76225.5	27931.2	64884.4	78082.8	88066.5
P63158	High mobility group protein B1	Hmgb1	50	4	1.023	0.953172	1.12317e+06	1.47629e+06	1.80925e+06	1.83875e+06	1.50963e+06	1.12188e+06
Q62420	Endophilin-A1	Sh3gl2	46	6	1.021	0.640962	475649	721000	921244	696311	736443	849772
O08810	116 kDa U5 small nuclear ribonucleoprotein component	Eftud2	33	3	1.019	0.787532	47511.4	25590.2	54606.9	51650	48401.5	18705.4
P62331	ADP-ribosylation factor 6	Arf6	10	2	1.016	0.876016	280953	220518	399087	285483	417570	234010
P58252	Elongation factor 2	Eef2	286	30	1.013	0.409063	1.13516e+07	1.01137e+07	1.2773e+07	1.14431e+07	1.1498e+07	1.76448e+07
P62317	Small nuclear ribonucleoprotein Sm D2	Snrpd2	5	3	1.013	0.686121	278894	196930	280100	204347	282484	341967
O88543	COP9 signalosome complex subunit 3	Cops3	6	2	1.013	0.412699	81479.8	48768.4	67794.3	63596.5	68661.8	144637
Q921F2	TAR DNA-binding protein 43	Tardbp	99	12	1.011	0.755287	4.5472e+06	3.85772e+06	4.69866e+06	3.79697e+06	4.59802e+06	5.30152e+06
P68368	Tubulin alpha-4A chain	Tuba4a	837	5	1.011	0.697966	5.16582e+06	3.59808e+06	6.46712e+06	5.11301e+06	5.22082e+06	5.67552e+06
Q64511	DNA topoisomerase 2-beta	Top2b	8	5	1.01	0.959637	250724	151270	171412	173162	132144	297545
Q9CXY6	Interleukin enhancer-binding factor 2	Ilf2	21	6	1.002	0.987645	508597	1.01757e+06	335747	509645	460216	754347
Q61792	LIM and SH3 domain protein 1	Lasp1	66	7	1.002	0.88857	1.01224e+06	720923	1.07681e+06	800052	1.03638e+06	1.01408e+06
Q99P72	Reticulon-4	Rtn4	29	5	1.002	0.891654	523344	329936	416342	329642	417072	572591
P17182	Alpha-enolase	Eno1	321	21	0.994	0.596549	2.17355e+07	1.64318e+07	2.16736e+07	1.88932e+07	2.15378e+07	2.30425e+07
Q8JZK9	Hydroxymethylglutaryl-CoA synthase, cytoplasmic	Hmgcs1	46	10	0.989	0.452864	1.12805e+06	632381	947463	937213	919425	1.32953e+06
Q9D8E6	60S ribosomal protein L4	Rpl4	38	8	0.986	0.911189	1.0952e+06	524890	813014	695417	801453	912019
P43274	Histone H1.4	H1-4	110	2	0.984	0.507841	1.29769e+06	442086	1.28994e+06	957108	1.26941e+06	1.46235e+06
Q505F5	Leucine-rich repeat-containing protein 47	Lrrc47	3	2	0.979	0.61497	67857.4	55439.2	44984.8	54301.5	49069.6	93602.9
Q9Z1P6	NADH dehydrogenase	Ndufa7	5	2	0.979	0.946887	36007.3	75034.4	92932.2	24064.6	162608	73470.6
Q05920	Pyruvate carboxylase, mitochondrial	Pc	2341	61	0.975	0.472162	3.91911e+08	4.19744e+08	4.16634e+08	4.0624e+08	3.82124e+08	4.10092e+08
P33173	Kinesin-like protein KIF1A	Kif1a	6	3	0.974	0.428848	133618	109798	19854.6	105928	106903	154428
Q01768	Nucleoside diphosphate kinase B	Nme2	100	2	0.964	0.393822	299938	151192	285494	252970	275076	399963
P05201	Aspartate aminotransferase, cytoplasmic	Got1	100	15	0.962	0.706797	2.50074e+06	2.32717e+06	2.50167e+06	2.40634e+06	2.29663e+06	2.89661e+06
P00493	Hypoxanthine-guanine phosphoribosyltransferase	Hprt1	51	6	0.961	0.498219	995660	289349	858433	709303	1.12235e+06	825327
Q93092	Transaldolase	Taldo1	42	8	0.961	0.765779	1.47436e+06	1.45285e+06	1.36649e+06	1.2594e+06	1.39669e+06	1.88526e+06
P62806	Histone H4	H4c1	108	7	0.96	0.804485	7.37092e+06	4.22525e+06	6.23164e+06	4.91854e+06	5.98224e+06	7.81024e+06
Q8CAY6	Acetyl-CoA acetyltransferase, cytosolic	Acat2	47	5	0.959	0.954285	713505	342504	1.00961e+06	500488	684441	768511
P08553	Neurofilament medium polypeptide	Nefm	143	13	0.958	0.883363	1.4537e+06	2.24515e+06	1.67267e+06	1.5454e+06	1.60267e+06	2.41166e+06
P70677	Caspase-3	Casp3	12	3	0.957	0.830604	1.0099e+06	400252	879185	512580	841630	1.05439e+06
P24369	Peptidyl-prolyl cis-trans isomerase B	Ppib	150	12	0.955	0.573658	4.52331e+06	2.96545e+06	4.51447e+06	3.46346e+06	4.31247e+06	5.98878e+06
P08551	Neurofilament light polypeptide	Nefl	105	9	0.955	0.399727	982761	1.01189e+06	739910	938326	905488	1.56054e+06
O70589	Peripheral plasma membrane protein CASK	Cask	6	2	0.953	0.692428	858506	401545	631390	558982	601509	915082
P14206	40S ribosomal protein SA	Rpsa	14	5	0.951	0.588985	1.30348e+06	774972	862204	667464	819676	1.09293e+06
Q9CQA3	Succinate dehydrogenase	Sdhb	3	3	0.947	0.65391	1.2012e+06	836754	544381	599882	792946	792556
P63028	Translationally-controlled tumor protein	Tpt1	12	3	0.944	0.636854	525796	379933	552043	442010	496541	643281
P46471	26S proteasome regulatory subunit 7	Psmc2	27	4	0.935	0.618973	229555	156313	212531	188430	198686	261988
Q8BG05	Heterogeneous nuclear ribonucleoprotein A3	Hnrnpa3	137	13	0.933	0.620819	5.22558e+06	2.99317e+06	5.19372e+06	4.36293e+06	4.84589e+06	5.33403e+06
Q8BG39	Synaptic vesicle glycoprotein 2B	Sv2b	12	2	0.931	0.744585	90503.3	14426.2	58397.1	113317	25824.6	54369.8
P27773	Protein disulfide-isomerase A3	Pdia3	98	14	0.931	0.642952	1.88639e+06	2.11132e+06	2.24411e+06	1.96554e+06	1.79786e+06	2.23737e+06
P28271	Cytoplasmic aconitate hydratase	Aco1	6	2	0.931	0.733048	49775.5	127521	19626.3	46333.4	56902.5	24038
P14131	40S ribosomal protein S16	Rps16	39	4	0.929	0.961522	3.74858e+06	2.49536e+06	4.9992e+06	3.48408e+06	3.44341e+06	4.0307e+06
P26369	Splicing factor U2AF 65 kDa subunit	U2af2	8	3	0.925	0.582082	126861	54942.1	128268	108528	117337	121605
Q9CVB6	Actin-related protein 2/3 complex subunit 2	Arpc2	19	4	0.923	0.431155	409157	704145	382586	377765	334849	479924
P50518	V-type proton ATPase subunit E 1	Atp6v1e1	33	3	0.92	0.437553	356467	403391	426683	382151	371180	370940
P40142	Transketolase	Tkt	114	17	0.919	0.669147	4.38445e+06	2.77818e+06	4.34706e+06	3.74113e+06	3.99308e+06	4.46304e+06
P62137	Serine/threonine-protein phosphatase PP1-alpha catalytic subunit	Ppp1ca	98	4	0.917	0.873564	3.16816e+06	2.1324e+06	3.30312e+06	2.47691e+06	2.90383e+06	3.37864e+06
P20152	Vimentin	Vim	272	25	0.912	0.866145	1.00989e+07	6.59229e+06	8.21489e+06	7.02823e+06	7.48934e+06	1.1573e+07
Q9Z2U1	Proteasome subunit alpha type-5	Psma5	7	2	0.908	0.634389	119796	363514	149986	136261	93531.5	256325
Q9R1P4	Proteasome subunit alpha type-1	Psma1	6	2	0.905	0.746293	224316	391109	179098	194190	203061	299608
P08249	Malate dehydrogenase, mitochondrial	Mdh2	498	16	0.903	0.84477	4.38541e+07	3.10471e+07	4.89385e+07	3.56912e+07	3.95964e+07	5.27967e+07
Q9Z204	Heterogeneous nuclear ribonucleoproteins C1/C2	Hnrnpc	35	8	0.901	0.697266	1.07903e+06	785048	1.14787e+06	924616	972669	1.32666e+06
Q8VDP4	Cell cycle and apoptosis regulator protein 2	Ccar2	7	3	0.893	0.930081	153438	79785.6	122689	109588	100669	128298
P09411	Phosphoglycerate kinase 1	Pgk1	118	15	0.889	0.909712	7.86139e+06	5.3961e+06	7.13282e+06	6.33811e+06	6.24272e+06	7.30399e+06
Q60668	Heterogeneous nuclear ribonucleoprotein D0	Hnrnpd	84	7	0.882	0.811114	4.1965e+06	2.65422e+06	4.45182e+06	3.50432e+06	3.70051e+06	4.39875e+06
Q99LX0	Parkinson disease protein 7 homolog	Park7	31	4	0.881	0.824947	1.20811e+06	652273	1.02342e+06	803063	901513	1.31849e+06
Q9JMH6	Thioredoxin reductase 1, cytoplasmic	Txnrd1	4	2	0.879	0.879489	109315	94537	109006	95853.3	95388	130390
P08228	Superoxide dismutase	Sod1	23	3	0.877	0.557633	467392	375273	483757	409800	458989	371926
P19157	Glutathione S-transferase P 1	Gstp1	16	3	0.874	0.990094	696774	482180	836400	586607	609268	792199
P03995	Glial fibrillary acidic protein	Gfap	320	20	0.869	0.164247	9.14757e+07	1.52446e+08	8.20577e+07	4.89907e+07	7.94784e+07	8.08198e+07
Q9CPY7	Cytosol aminopeptidase	Lap3	29	6	0.867	0.783626	282861	250614	328180	245223	244651	343359
O55142	60S ribosomal protein L35a	Rpl35a	18	2	0.866	0.451064	329040	167940	249263	138998	215934	240619
P26645	Myristoylated alanine-rich C-kinase substrate	Marcks	35	3	0.865	0.32591	1.12242e+06	832699	1.29643e+06	660050	970500	1.00721e+06
P70257	Nuclear factor 1 X-type	Nfix	7	2	0.862	0.827828	174517	100640	151873	120860	130928	197055
Q91Z31	Polypyrimidine tract-binding protein 2	Ptbp2	9	4	0.853	0.460668	120000	27518.5	43248.4	36892.2	27409	42701.9
Q7TQI3	Ubiquitin thioesterase OTUB1	Otub1	48	7	0.852	0.861389	1.92616e+06	823973	1.88797e+06	1.24277e+06	1.60888e+06	1.78194e+06
Q61656	Probable ATP-dependent RNA helicase DDX5	Ddx5	152	9	0.851	0.75694	4.95794e+06	3.3659e+06	5.09138e+06	4.03986e+06	4.22044e+06	5.97349e+06
Q8BVI4	Dihydropteridine reductase	Qdpr	12	3	0.845	0.418281	78456.7	79277.3	14939.1	217714	66263	46169.7
Q7TSF1	Desmoglein-1-beta	Dsg1b	6	3	0.83	0.350877	69570	241649	66040.7	100806	57714.9	36202.5
Q8BFR5	Elongation factor Tu, mitochondrial	Tufm	73	11	0.825	0.942391	2.50394e+06	1.23995e+06	2.30913e+06	1.71244e+06	1.90475e+06	2.07966e+06
Q9CPV4	Glyoxalase domain-containing protein 4	Glod4	23	6	0.806	0.58725	614782	325803	480133	457525	387150	377668
Q9WUK6	Zinc finger and BTB domain-containing protein 18	Zbtb18	53	8	0.789	0.738323	2.33389e+06	1.42133e+06	2.34651e+06	1.51469e+06	1.84114e+06	2.24392e+06
Q60972	Histone-binding protein RBBP4	Rbbp4	10	3	0.783	0.75088	226145	112502	224912	148734	176179	301045
Q80SW1	S-adenosylhomocysteine hydrolase-like protein 1	Ahcyl1	51	12	0.783	0.191043	1.57011e+09	1.44566e+09	1.48124e+09	9.88889e+08	1.15909e+09	1.485e+09
Q99KI0	Aconitate hydratase, mitochondrial	Aco2	308	23	0.779	0.339979	4.73086e+07	3.46844e+07	4.34848e+07	3.12863e+07	3.38743e+07	4.33906e+07
O70325	Phospholipid hydroperoxide glutathione peroxidase	Gpx4	15	2	0.776	0.696031	557059	100806	397923	308739	483623	308006
Q8C0E2	Vacuolar protein sorting-associated protein 26B	Vps26b	32	6	0.769	0.155384	1.28991e+06	1.39294e+06	971501	683806	991766	1.0384e+06
P30681	High mobility group protein B2	Hmgb2	20	2	0.764	0.90549	445510	284896	467448	340408	334779	482830
P04370	Myelin basic protein	Mbp	67	5	0.756	0.212183	5.46894e+06	4.48213e+06	7.09056e+06	3.8013e+06	4.13706e+06	5.25181e+06
Q3UMR5	Calcium uniporter protein, mitochondrial	Mcu	4	2	0.747	0.320894	38558.6	37842.7	45307.2	28821.3	45326	25426.7
P30416	Peptidyl-prolyl cis-trans isomerase FKBP4	Fkbp4	24	3	0.743	0.86199	188411	152036	160763	119378	93358.1	328529
P62320	Small nuclear ribonucleoprotein Sm D3	Snrpd3	22	3	0.733	0.945242	536904	197767	468943	264120	343709	598315
P49722	Proteasome subunit alpha type-2	Psma2	7	4	0.731	0.833803	175872	67394.8	148922	108918	74707	307693
Q9CQW1	Synaptobrevin homolog YKT6	Ykt6	9	3	0.727	0.946274	356488	165969	343132	231177	249314	331690
P56480	ATP synthase subunit beta, mitochondrial	Atp5f1b	52	10	0.725	0.482818	2.5444e+06	2.58846e+06	1.52429e+06	1.7473e+06	1.84427e+06	1.99074e+06
Q9R1P0	Proteasome subunit alpha type-4	Psma4	16	3	0.716	0.479196	307494	531360	268400	220103	202767	452986
P35293	Ras-related protein Rab-18	Rab18	11	2	0.712	0.0723839	78000.4	73315.5	85746.3	46572.2	55499.3	67984.7
Q9CZW5	Mitochondrial import receptor subunit TOM70	Tomm70	29	8	0.707	0.332615	1.33813e+06	1.0673e+06	810293	724406	754751	1.10251e+06
Q9DCW4	Electron transfer flavoprotein subunit beta	Etfb	29	6	0.685	0.414655	702022	337592	576086	378648	465798	394474
P28738	Kinesin heavy chain isoform 5C	Kif5c	20	6	0.677	0.280216	503782	546277	291816	286881	341249	347268
P68037	Ubiquitin-conjugating enzyme E2 L3	Ube2l3	12	4	0.664	0.867045	432416	138790	390331	238772	259229	307116
O70423	Membrane primary amine oxidase	Aoc3	24	3	0.647	0.927608	212766	60022	239523	213411	137570	89675
P07356	Annexin A2	Anxa2	46	8	0.642	0.197515	960029	1.50923e+06	690831	613665	747139	616373
Q02780	Nuclear factor 1 A-type	Nfia	8	2	0.629	0.465787	195659	77204.5	185405	116580	90889.4	116953
Q9EST1	Gasdermin-A	Gsdma	4	2	0.597	0.315515	48478.6	170924	25879.1	18648.1	28927.9	42955.3
P62082	40S ribosomal protein S7	Rps7	7	3	0.592	0.808004	341061	90770.1	312631	163575	184936	223438
P97351	40S ribosomal protein S3a	Rps3a	32	8	0.59	0.104069	3.94058e+06	4.85646e+06	2.73911e+06	2.17058e+06	2.79818e+06	2.32346e+06
Q61885	Myelin-oligodendrocyte glycoprotein	Mog	32	3	0.589	0.712529	1.9053e+06	1.88747e+06	738093	1.11137e+06	1.44901e+06	1.09519e+06
Q9D1A2	Cytosolic non-specific dipeptidase	Cndp2	15	2	0.588	0.7636	149186	30687.1	99390	58458.2	21464.9	172533
Q02257	Junction plakoglobin	Jup	183	23	0.585	0.0800613	7.68876e+06	1.10021e+07	5.65797e+06	3.6484e+06	5.40903e+06	4.49486e+06
Q8R050	Eukaryotic peptide chain release factor GTP-binding subunit ERF3A	Gspt1	11	3	0.57	0.146447	171077	87541.6	101253	57680.3	101726	57525.5
E9Q557	Desmoplakin	Dsp	99	24	0.481	0.0537298	5.78573e+06	8.67177e+06	4.07321e+06	2.78377e+06	3.35336e+06	2.25171e+06
P56959	RNA-binding protein FUS	Fus	8	2	0.428	0.0816488	199506	74755.9	96599.5	73155.7	41315	34095.8
Q00612	Glucose-6-phosphate 1-dehydrogenase X	G6pdx	7	2	0.423	0.426511	108776	24264.1	84978.8	67021	19426.3	35982.5
P31324	cAMP-dependent protein kinase type II-beta regulatory subunit	Prkar2b	10	3	0.409	0.344928	223230	234164	183908	91394.5	302648	45218.9
Q9WTL4	Insulin receptor-related protein	Insrr	10	2	0.388	0.690721	373627	210900	71572.2	53820	449499	81917.5
Q9WTL7	Acyl-protein thioesterase 2	Lypla2	10	3	0.378	0.383799	242579	117277	219760	82975.3	27188.3	285857
P97350	Plakophilin-1	Pkp1	4	2	0.255	0.0320605	74669.5	247891	80381.2	22923.5	14444.6	20488.5
P01837	Immunoglobulin kappa constant	Igkc	91	3	0.244	0.362746	7.31702e+06	1.22584e+06	1.99286e+07	1.49945e+06	1.7823e+06	3.76538e+06
P01869	Ig gamma-1 chain C region, membrane-bound form	Ighg1	68	6	0.205	0.3806	6.84655e+06	1.01613e+06	2.65096e+07	1.40111e+06	1.21975e+06	4.31133e+06

## Sheet: S5-7. 5 weeks, all
UniProt ID	Protein	Gene	# PSMs	# unique peptides	Median fold change: PhoxID with compound 1 vs. 2	Fold change p-value	Abundances (Grouped): Compound 2, Bio. Rep. 1	Abundances (Grouped): Compound 2, Bio. Rep. 2	Abundances (Grouped): Compound 2, Bio. Rep. 3	Abundances (Grouped): Compound 1, Bio. Rep. 1	Abundances (Grouped): Compound 1, Bio. Rep. 2	Abundances (Grouped): Compound 1, Bio. Rep. 3
P35803	Neuronal membrane glycoprotein M6-b	Gpm6b	18	3	61.472	0.203687	7073.42	23182.1	37389.8	13805.2	1.7447e+06	1.42504e+06
Q9CPW0	Contactin-associated protein-like 2	Cntnap2	271	34	42.67	0.00651932	795226	1.25823e+06	3.05051e+06	1.41216e+07	5.36883e+07	5.73099e+07
P23819	Glutamate receptor 2	Gria2	216	27	30.558	0.00364183	2.00429e+06	1.06094e+06	1.48677e+06	1.70673e+07	4.54328e+07	4.94949e+07
Q9Z2W8	Glutamate receptor 4	Gria4	392	22	27.843	0.0039407	5.02622e+06	1.94063e+06	1.95839e+06	2.1763e+07	5.45281e+07	6.38227e+07
Q8R464	Cell adhesion molecule 4	Cadm4	146	14	27.713	0.00692535	323612	654981	637413	5.0964e+06	1.76648e+07	1.90737e+07
Q69ZK9	Neuroligin-2	Nlgn2	68	10	27.129	0.0456831	326645	298522	294156	1.3751e+06	8.0986e+06	8.60616e+06
Q99JY0	Trifunctional enzyme subunit beta, mitochondrial	Hadhb	22	3	25.217	0.047093	44944	12507.8	17340.7	62478	437285	462358
P63056	Noelin-3	Olfm3	71	11	24.464	0.00679435	296858	411537	490765	3.6705e+06	1.0068e+07	1.11007e+07
P56528	ADP-ribosyl cyclase/cyclic ADP-ribose hydrolase 1	Cd38	27	5	23.51	0.0349701	107393	120993	119916	620838	3.25515e+06	2.8192e+06
Q05793	Basement membrane-specific heparan sulfate proteoglycan core protein	Hspg2	318	55	21.861	0.042665	1.41653e+06	1.52097e+06	2.13698e+06	6.6374e+06	3.32501e+07	4.12751e+07
O88507	Ciliary neurotrophic factor receptor subunit alpha	Cntfr	53	8	21.817	0.123457	244045	301796	281991	453832	6.71474e+06	6.15228e+06
B9EKR1	Receptor-type tyrosine-protein phosphatase zeta	Ptprz1	134	16	21.484	0.000660711	1.1977e+06	838421	1.05792e+06	1.32202e+07	2.27287e+07	2.35491e+07
Q9Z218	Dipeptidyl aminopeptidase-like protein 6	Dpp6	107	14	21.47	0.00888724	481123	667786	1.09588e+06	4.33433e+06	1.44716e+07	1.43377e+07
Q6NXK7	Inactive dipeptidyl peptidase 10	Dpp10	47	8	21.373	0.0462841	243674	280291	281509	1.08089e+06	5.99054e+06	6.01696e+06
Q61292	Laminin subunit beta-2	Lamb2	317	48	20.293	0.0311619	1.64589e+06	1.67992e+06	2.49773e+06	9.2588e+06	3.40912e+07	5.20135e+07
Q8BYI9	Tenascin-R	Tnr	518	35	20.199	0.00654286	2.10854e+06	3.93433e+06	6.58483e+06	2.66058e+07	7.94693e+07	9.29476e+07
Q62059	Versican core protein	Vcan	68	14	19.425	0.0696891	424361	409725	664199	1.23615e+06	8.24328e+06	9.75985e+06
Q9R1V7	Disintegrin and metalloproteinase domain-containing protein 23	Adam23	81	10	19.344	0.0626035	275074	506274	624697	1.22945e+06	9.79316e+06	1.09793e+07
Q62443	Neuronal pentraxin-1	Nptx1	84	15	19.128	0.00644154	572171	366754	400584	3.06796e+06	7.86978e+06	7.66244e+06
Q8K406	Leucine-rich repeat LGI family member 3	Lgi3	94	16	18.87	0.0112194	555447	635354	833216	4.38607e+06	1.19889e+07	1.30958e+07
P09470	Angiotensin-converting enzyme	Ace	8	3	18.823	0.191892	11949.2	10712.9	24043.6	13226.5	224923	237627
Q810U3	Neurofascin	Nfasc	371	32	18.772	0.00560414	1.40122e+06	3.16936e+06	4.2988e+06	1.97285e+07	5.94962e+07	6.14505e+07
P10493	Nidogen-1	Nid1	236	34	18.455	0.0240018	2.30707e+06	1.79696e+06	2.10805e+06	1.11344e+07	3.89048e+07	4.02763e+07
Q80YX1	Tenascin	Tnc	164	28	18.356	0.0241062	942489	1.14136e+06	1.33857e+06	5.95447e+06	2.09512e+07	2.37476e+07
Q8BYM5	Neuroligin-3	Nlgn3	53	7	18.29	0.153661	105178	61448.4	95376.7	104017	1.74444e+06	1.75734e+06
Q8R2Y2	Cell surface glycoprotein MUC18	Mcam	30	9	18.077	0.0920879	182664	184660	169575	384027	3.38485e+06	3.30198e+06
Q9WVH9	Fibulin-5	Fbln5	7	2	17.864	0.0577785	40769.4	47804.8	43071.3	150495	769435	1.15158e+06
P70232	Neural cell adhesion molecule L1-like protein	Chl1	128	24	17.273	0.0477692	475131	509009	605423	2.46617e+06	2.0747e+07	8.7923e+06
Q61330	Contactin-2	Cntn2	241	27	17.194	0.0628857	1.1112e+07	1.8625e+06	1.95047e+06	1.0685e+07	3.40143e+07	3.35361e+07
Q9CS84	Neurexin-1	Nrxn1	38	7	17.162	0.0194369	180139	274578	222775	1.16615e+06	3.82319e+06	4.14243e+06
P23818	Glutamate receptor 1	Gria1	143	16	17.017	0.0177569	508506	773786	838434	4.58596e+06	2.14592e+07	1.31672e+07
P35438	Glutamate receptor ionotropic, NMDA 1	Grin1	57	11	17.015	0.0333559	325286	292236	332380	1.42546e+06	5.53474e+06	5.81284e+06
Q6PHS9	Voltage-dependent calcium channel subunit alpha-2/delta-2	Cacna2d2	93	17	16.698	0.010357	1.83005e+06	537441	728665	4.48862e+06	1.2167e+07	1.21992e+07
Q8BJD1	Inter-alpha-trypsin inhibitor heavy chain H5	Itih5	10	2	16.618	0.15259	6866.42	28767.4	24716.1	20078.4	410738	586147
Q71M36	Chondroitin sulfate proteoglycan 5	Cspg5	11	3	16.416	0.0177676	74850.8	74458	96555.5	447579	1.22877e+06	1.44755e+06
Q99N28	Cell adhesion molecule 3	Cadm3	75	10	16.189	0.0132375	277834	508970	567236	2.48244e+06	8.23974e+06	1.00791e+07
A2ASQ1	Agrin	Agrn	175	34	16.08	0.0324134	939090	793307	1.31975e+06	3.80032e+06	1.51009e+07	1.74521e+07
Q4VAE3	Transmembrane protein 65	Tmem65	25	3	15.922	0.0962942	21869.1	41093.2	20739.3	46242.7	348208	393902
Q8BNA6	Protocadherin Fat 3	Fat3	3	2	15.918	0.00249483	16021.7	31309.3	14118.9	166044	259381	255031
O35206	Collagen alpha-1(XV) chain	Col15a1	16	4	15.837	0.165625	32839.9	86027.3	29466.2	45700.1	520101	591068
P08122	Collagen alpha-2(IV) chain	Col4a2	24	4	15.698	0.00820802	140831	217405	339750	1.25042e+06	3.41289e+06	4.36188e+06
P12960	Contactin-1	Cntn1	654	38	15.417	0.0067871	5.63871e+06	6.4392e+06	9.12044e+06	4.11757e+07	9.92738e+07	1.05577e+08
Q80Z24	Neuronal growth regulator 1	Negr1	28	5	15.354	0.0671182	145245	136572	115135	351343	2.09699e+06	2.27045e+06
Q9DB72	BTB/POZ domain-containing protein 17	Btbd17	55	12	14.93	0.00372624	307478	498188	608337	3.05749e+06	7.69121e+06	7.43809e+06
P10852	4F2 cell-surface antigen heavy chain	Slc3a2	95	10	14.76	0.018331	585206	1.04449e+06	1.18472e+06	4.12883e+06	1.54164e+07	1.64549e+07
Q9JIA1	Leucine-rich glioma-inactivated protein 1	Lgi1	61	13	14.535	0.0333872	466143	511572	732428	2.08953e+06	7.43573e+06	9.79449e+06
Q9D710	Thioredoxin-related transmembrane protein 2	Tmx2	4	2	14.497	0.145125	27264.8	8627.32	12731.5	17086.5	201601	184565
Q9Z2W9	Glutamate receptor 3	Gria3	328	25	14.44	0.0104027	1.02409e+06	3.81516e+06	4.34461e+06	2.67218e+07	5.50925e+07	6.435e+07
Q5F226	Protocadherin Fat 2	Fat2	265	64	13.85	0.0533191	1.48785e+06	2.12403e+06	1.89189e+06	5.31376e+06	2.62025e+07	2.81933e+07
O54991	Contactin-associated protein 1	Cntnap1	156	26	13.795	0.078207	1.02322e+06	827857	1.12902e+06	2.20059e+06	1.41157e+07	1.43338e+07
P02469	Laminin subunit beta-1	Lamb1	47	15	13.273	0.0509256	257834	173074	198764	595003	2.63825e+06	3.06735e+06
O88322	Nidogen-2	Nid2	107	22	13.121	0.0301014	601505	448947	1.16927e+06	2.42847e+06	7.8921e+06	1.41857e+07
P02468	Laminin subunit gamma-1	Lamc1	148	30	13.01	0.083192	3.07799e+06	892555	1.072e+06	2.45689e+06	1.39468e+07	1.62501e+07
P15116	Cadherin-2	Cdh2	39	7	12.893	0.102213	128817	140912	95948.7	215542	1.91464e+06	1.66082e+06
P13595	Neural cell adhesion molecule 1	Ncam1	403	28	12.855	0.0114052	2.05557e+06	5.01071e+06	8.40328e+06	2.9177e+07	6.44135e+07	6.65205e+07
P09055	Integrin beta-1	Itgb1	48	12	12.775	0.0274994	458880	366489	319267	1.45417e+06	4.68197e+06	5.19556e+06
Q810U4	Neuronal cell adhesion molecule	Nrcam	163	21	12.581	0.0303151	747275	2.23589e+06	5.04703e+06	1.12681e+07	2.81305e+07	3.22373e+07
Q61625	Glutamate receptor ionotropic, delta-2	Grid2	336	27	12.5	0.00545645	3.08923e+06	4.46152e+06	6.96032e+06	2.32276e+07	5.57674e+07	6.08882e+07
Q8CJH3	Plexin-B1	Plxnb1	76	17	12.425	0.0412749	377121	405689	425892	1.34875e+06	5.04056e+06	5.18692e+06
Q9R1V4	Disintegrin and metalloproteinase domain-containing protein 11	Adam11	57	9	12.318	0.0441121	202821	187968	176570	615936	2.31538e+06	2.60761e+06
O35136	Neural cell adhesion molecule 2	Ncam2	115	19	12.077	0.025745	785692	654573	902903	3.27709e+06	9.48892e+06	1.20838e+07
Q8CHP8	Glycerol-3-phosphate phosphatase	Pgp	10	2	12.03	0.179237	13653.3	39875.4	35562.5	26049.3	427814	498174
P11627	Neural cell adhesion molecule L1	L1cam	92	15	11.922	0.260864	1.17311e+06	571542	645501	492150	7.69583e+06	8.49907e+06
Q80WM4	Hyaluronan and proteoglycan link protein 4	Hapln4	54	12	11.903	0.0407756	302757	353739	559493	1.11496e+06	4.2106e+06	5.38713e+06
Q3UH99	Protein shisa-6	Shisa6	25	9	11.36	0.0645005	285342	350277	407034	909096	3.97924e+06	6.25582e+06
Q9WV18	Gamma-aminobutyric acid type B receptor subunit 1	Gabbr1	25	6	11.306	0.0268163	147178	143632	322781	508044	1.66393e+06	1.75634e+06
Q60675	Laminin subunit alpha-2	Lama2	119	35	11.211	0.0712722	921034	694395	749949	1.7426e+06	8.40776e+06	9.59415e+06
Q3V3R4	Integrin alpha-1	Itga1	11	4	11.17	0.219837	107511	81441.1	71070.7	68748.9	909671	1.11169e+06
P35436	Glutamate receptor ionotropic, NMDA 2A	Grin2a	12	5	10.828	0.0495042	77096.2	96324.3	25063.8	144388	871384	834810
Q8K4Z0	Leucine-rich repeat LGI family member 2	Lgi2	7	4	10.779	0.00938618	69042.8	93144.3	45988.2	281622	744228	774189
Q8BLK3	Limbic system-associated membrane protein	Lsamp	48	6	10.757	0.00199471	347469	316066	374708	2.5894e+06	3.73774e+06	4.27155e+06
Q61739	Integrin alpha-6	Itga6	4	2	10.423	0.0758583	36071.9	13464.7	26802.7	44161.9	280578	279372
B2RXS4	Plexin-B2	Plxnb2	65	13	10.332	0.15723	382005	294538	381726	408288	4.18837e+06	3.94405e+06
Q8R5J9	PRA1 family protein 3	Arl6ip5	10	2	10.31	0.140768	50595.8	25794.2	17457.1	33509.9	265938	268487
P01831	Thy-1 membrane glycoprotein	Thy1	27	3	10.156	0.013013	70843.2	252348	281942	1.13162e+06	2.5628e+06	3.04436e+06
Q9JHG0	Cerebellin-3	Cbln3	49	4	10.122	0.0310961	75470.5	399299	509688	2.43399e+06	4.04157e+06	5.65791e+06
Q8K1S1	Leucine-rich repeat LGI family member 4	Lgi4	23	7	10.014	0.0281901	227349	155267	241028	681295	2.27674e+06	2.34431e+06
P42932	T-complex protein 1 subunit theta	Cct8	71	11	9.77	0.198064	496928	1.37489e+06	1.83841e+06	1.00507e+06	1.34326e+07	4.09042e+07
Q8BY89	Choline transporter-like protein 2	Slc44a2	14	4	9.747	0.102979	97401.5	105883	109500	176507	1.03204e+06	1.16331e+06
Q8R2Z5	von Willebrand factor A domain-containing protein 1	Vwa1	11	5	9.741	0.100886	37197.6	57851.9	40681.6	72805.8	499418	396270
Q80TS3	Adhesion G protein-coupled receptor L3	Adgrl3	30	12	9.654	0.0259637	221094	268105	264679	956793	2.55524e+06	2.97782e+06
Q8R366	Immunoglobulin superfamily member 8	Igsf8	134	11	9.615	0.01872	764840	1.50361e+06	2.79475e+06	5.32434e+06	1.44569e+07	1.77612e+07
Q64487	Receptor-type tyrosine-protein phosphatase delta	Ptprd	55	14	9.582	0.0635705	330246	320569	335435	796017	3.16428e+06	3.84603e+06
P15209	BDNF/NT-3 growth factors receptor	Ntrk2	10	3	9.551	0.220927	77812.1	107494	123768	81183.8	1.19007e+06	1.02668e+06
E9Q7X7	Neurexin-2	Nrxn2	49	10	9.413	0.0408936	518449	380070	366521	1.08678e+06	3.77403e+06	3.57756e+06
Q02788	Collagen alpha-2(VI) chain	Col6a2	8	2	9.412	0.0334083	15648.4	31673.9	12778.4	47779.9	147282	204014
P02463	Collagen alpha-1(IV) chain	Col4a1	22	3	9.339	0.0468258	334970	173076	154198	492930	1.61639e+06	2.52802e+06
Q9WTS4	Teneurin-1	Tenm1	15	3	9.305	0.122232	41842.7	13046.2	26577.7	32211.4	247294	253667
Q9R087	Glypican-6	Gpc6	4	3	9.192	0.0469032	59013.7	32997.9	34576.2	87865.8	325100	317836
P54763	Ephrin type-B receptor 2	Ephb2	13	3	9.161	0.169288	72805.6	41597.6	74152.5	63875.3	676152	666995
Q9QYS2	Metabotropic glutamate receptor 3	Grm3	30	6	9.138	0.0776113	327917	244060	208304	480418	2.23009e+06	2.43882e+06
P97797	Tyrosine-protein phosphatase non-receptor type substrate 1	Sirpa	34	7	9.053	0.0250187	643116	306187	372084	1.11286e+06	3.53047e+06	3.36839e+06
B1AS29	Glutamate receptor ionotropic, kainate 3	Grik3	4	3	9.017	0.131264	17620.4	49914.7	29338.5	36706.3	264551	275838
Q68EF4	Metabotropic glutamate receptor 4	Grm4	84	14	8.953	0.065769	769499	723336	1.41069e+06	1.6895e+06	6.88961e+06	7.51386e+06
P61215	Carbonic anhydrase-related protein 10	Ca10	8	2	8.802	0.00372965	64145.3	72817.8	62242.5	456340	822406	564584
P16388	Potassium voltage-gated channel subfamily A member 1	Kcna1	30	3	8.737	0.0175693	98935.5	259354	351691	787673	2.26596e+06	2.33473e+06
Q14BI2	Metabotropic glutamate receptor 2	Grm2	37	5	8.553	0.126655	125689	152695	216935	212631	1.30597e+06	1.44337e+06
Q8BM13	Noelin-2	Olfm2	8	2	8.487	0.207998	46397.2	74160.8	47447.5	47783.1	402687	521741
P97798	Neogenin	Neo1	29	10	8.305	0.026	127387	113959	163314	409988	1.05791e+06	1.23086e+06
P39087	Glutamate receptor ionotropic, kainate 2	Grik2	5	2	8.116	0.0114649	14712.7	29826.3	29468.1	239170	523247	133166
Q8R2R9	AP-3 complex subunit mu-2	Ap3m2	8	2	8.106	0.268759	20326.9	22371.1	87768.2	26474.8	181337	194395
O35409	Glutamate carboxypeptidase 2	Folh1	5	4	8.073	0.0645123	13206.6	13652.9	13982.7	32926.9	110218	169072
P39061	Collagen alpha-1(XVIII) chain	Col18a1	19	5	8.054	0.153075	82596.5	87059.1	53230.7	84081.1	665230	758696
O35544	Excitatory amino acid transporter 4	Slc1a6	187	5	8.008	0.366553	212694	271380	364479	116047	3.08725e+06	2.17321e+06
Q9QUP5	Hyaluronan and proteoglycan link protein 1	Hapln1	53	9	7.858	0.0108175	643439	451866	679314	2.27186e+06	5.0559e+06	5.61701e+06
Q91V12	Cytosolic acyl coenzyme A thioester hydrolase	Acot7	65	7	7.79	0.110894	286112	868750	1.56948e+06	1.09584e+06	6.76792e+06	7.53169e+06
P55066	Neurocan core protein	Ncan	24	7	7.745	0.0203979	167586	199149	215511	667886	1.54233e+06	1.7204e+06
Q9CR57	60S ribosomal protein L14	Rpl14	6	2	7.715	0.152778	11309.9	17905	27358.2	19708.7	161340	138135
Q9R171	Cerebellin-1	Cbln1	82	5	7.685	0.00631366	478951	992545	1.23242e+06	5.17856e+06	7.62781e+06	8.91682e+06
Q8VHY0	Chondroitin sulfate proteoglycan 4	Cspg4	77	26	7.671	0.103469	340792	315500	351907	536158	2.90226e+06	2.61421e+06
P97772	Metabotropic glutamate receptor 1	Grm1	166	20	7.643	0.0397433	1.98037e+06	2.27679e+06	2.90109e+06	5.72772e+06	1.74015e+07	1.80732e+07
Q8BLQ9	Cell adhesion molecule 2	Cadm2	32	6	7.627	0.00531748	120462	88812.4	203558	567031	918768	935557
Q64444	Carbonic anhydrase 4	Ca4	57	6	7.612	0.100188	88510.8	663616	853262	821325	5.17056e+06	5.05144e+06
Q63912	Oligodendrocyte-myelin glycoprotein	Omg	14	6	7.598	0.0430089	100296	87797.6	107943	260579	762003	893871
Q80UG2	Plexin-A4	Plxna4	23	7	7.581	0.176181	105643	76833.9	83311.6	90235.7	723708	631555
P51410	60S ribosomal protein L9	Rpl9	14	2	7.507	0.308318	40964.4	97651.1	280595	66591.3	733110	742090
J3QNX5	Protein shisa-8	Shisa8	13	4	7.504	0.191679	60046.6	85957.5	92534	73746.7	645000	725258
Q9CX86	Heterogeneous nuclear ribonucleoprotein A0	Hnrnpa0	7	3	7.484	0.255753	62002.7	67714.7	89021.6	51000.9	506794	848849
E9PZ19	Protein turtle homolog B	Igsf9b	15	6	7.474	0.0234504	57041.2	47145.9	67581.3	170074	460296	426350
Q9R1V6	Disintegrin and metalloproteinase domain-containing protein 22	Adam22	70	13	7.441	0.0352696	340977	996315	751028	1.54003e+06	5.72088e+06	5.58809e+06
Q8R0I0	Angiotensin-converting enzyme 2	Ace2	5	2	7.406	0.00650737	19983.6	28683.2	46688.8	109102	212416	215605
Q64521	Glycerol-3-phosphate dehydrogenase, mitochondrial	Gpd2	51	12	7.389	0.220659	232485	844618	1.34705e+06	523934	1.32107e+07	6.24076e+06
Q99P47	Contactin-associated protein-like 4	Cntnap4	25	10	7.363	0.0508351	177822	324325	206386	452170	1.51956e+06	1.61734e+06
Q01098	Glutamate receptor ionotropic, NMDA 2C	Grin2c	13	3	7.16	0.0904605	60871.7	50889	82587	100573	435839	464006
Q9D1T0	Leucine-rich repeat and immunoglobulin-like domain-containing nogo receptor-interacting protein 1	Lingo1	7	3	7.137	0.222619	22034.6	9559.62	10874.6	11361.1	198966	77614.9
O88307	Sortilin-related receptor	Sorl1	7	4	7.119	0.332368	14159.3	34752.3	56512.4	15535.9	247386	257247
P18572	Basigin	Bsg	12	4	6.788	0.0297033	172912	178389	163270	492050	1.1737e+06	1.2e+06
Q80V42	Carboxypeptidase M	Cpm	10	3	6.733	0.0155748	58284.6	55458.2	140227	291372	392402	536859
P43406	Integrin alpha-V	Itgav	10	3	6.686	0.233176	191501	59565.6	52254.5	72854.9	447226	398282
Q9D3A9	Protein tweety homolog 1	Ttyh1	18	3	6.639	0.245308	112119	247064	220774	131565	1.99325e+06	1.4658e+06
Q8C129	Leucyl-cystinyl aminopeptidase	Lnpep	8	3	6.62	0.161829	65664.7	62517	24290.7	49011.3	413883	428283
P19137	Laminin subunit alpha-1	Lama1	50	20	6.555	0.13864	276458	314401	439542	444913	2.06094e+06	3.98248e+06
Q61425	Hydroxyacyl-coenzyme A dehydrogenase, mitochondrial	Hadh	3	2	6.554	0.498188	30543.1	34734.4	48414.3	10865.2	274275	227652
Q69ZU6	Thrombospondin type-1 domain-containing protein 7A	Thsd7a	29	8	6.553	0.0382038	315670	311710	299820	807827	2.0425e+06	2.23308e+06
Q80Z10	Astrotactin-2	Astn2	13	4	6.523	0.0766605	7613.09	19433.1	17172	23501	112011	130998
P97351	40S ribosomal protein S3a	Rps3a	6	3	6.492	0.153231	87911.2	3855.33	24131.1	144873	156655	164064
P28571	Sodium- and chloride-dependent glycine transporter 1	Slc6a9	49	6	6.46	0.0220637	378729	1.06514e+06	1.26995e+06	4.63938e+06	7.20586e+06	6.88034e+06
Q56A07	Sodium channel subunit beta-2	Scn2b	8	3	6.399	0.220735	22210.4	199376	357370	133689	1.29991e+06	1.27586e+06
Q99PI8	Reticulon-4 receptor	Rtn4r	7	3	6.382	0.183741	93881.6	86240.3	81472.6	87053	550379	647326
P70663	SPARC-like protein 1	Sparcl1	18	6	6.38	0.154452	64784.9	108147	129573	106606	708962	689946
O88343	Electrogenic sodium bicarbonate cotransporter 1	Slc4a4	270	20	6.346	0.0304862	1.94677e+06	6.00862e+06	8.1579e+06	1.70189e+07	3.81752e+07	3.81333e+07
B0V2N1	Receptor-type tyrosine-protein phosphatase S	Ptprs	14	4	6.258	0.0924842	54191.3	34101.6	24910.6	51777.4	213394	226437
P62812	Gamma-aminobutyric acid receptor subunit alpha-1	Gabra1	28	5	6.184	0.0135533	396587	448697	575379	1.33735e+06	2.86005e+06	2.77488e+06
Q9EPL2	Calsyntenin-1	Clstn1	2	2	6.162	0.167877	18973.3	12982.5	30950.8	20875.2	192224	116904
Q9D023	Mitochondrial pyruvate carrier 2	Mpc2	7	2	6.126	0.390393	116301	228952	367093	88948.4	1.98243e+06	1.40265e+06
Q9DCP2	Sodium-coupled neutral amino acid transporter 3	Slc38a3	16	3	6.113	0.0991424	67506.9	104584	122728	143188	789029	639342
P14231	Sodium/potassium-transporting ATPase subunit beta-2	Atp1b2	221	12	6.064	0.187686	436550	7.73503e+06	9.08247e+06	5.16713e+06	4.69051e+07	4.97611e+07
Q3U1J4	DNA damage-binding protein 1	Ddb1	6	3	5.924	0.332141	33618.6	31563.8	102629	199145	449736	28592.2
Q9DB05	Alpha-soluble NSF attachment protein	Napa	10	3	5.92	0.181221	16939.4	33850.7	38237.4	27159.5	237833	200401
Q80XI4	Phosphatidylinositol 5-phosphate 4-kinase type-2 beta	Pip4k2b	10	2	5.896	0.468187	19260.2	66018.1	117868	16457.5	389254	489896
O35841	Apoptosis inhibitor 5	Api5	6	2	5.778	0.443815	37381.6	37775.9	152130	33331.2	218251	220169
Q5DTL9	Sodium-driven chloride bicarbonate exchanger	Slc4a10	78	8	5.761	0.105369	180227	393032	563080	470068	2.26407e+06	2.36012e+06
P04925	Major prion protein	Prnp	8	3	5.642	0.110761	58175.5	74560.7	87659.1	99404.8	420638	441512
P70206	Plexin-A1	Plxna1	18	8	5.641	0.108724	125726	116746	107967	165597	664439	658513
Q91ZX7	Prolow-density lipoprotein receptor-related protein 1	Lrp1	187	37	5.627	0.0563025	1.7049e+06	2.62778e+06	3.46837e+06	4.63877e+06	1.82329e+07	1.47859e+07
Q9Z204	Heterogeneous nuclear ribonucleoproteins C1/C2	Hnrnpc	12	4	5.616	0.213725	48319.4	44648.8	32874.9	35875.7	294416	250744
P16305	Gamma-aminobutyric acid receptor subunit alpha-6	Gabra6	19	4	5.564	0.159605	96027.4	57415.6	70460.4	78564.9	392046	435134
P03911	NADH-ubiquinone oxidoreductase chain 4	Mtnd4	10	3	5.553	0.341187	23887.6	17457.1	44018.6	14736.4	169788	132659
Q8BKG3	Inactive tyrosine-protein kinase 7	Ptk7	13	4	5.55	0.0525744	73112.6	40029.1	57825.9	102277	320928	337532
P14131	40S ribosomal protein S16	Rps16	9	3	5.507	0.30782	343554	86401.6	90768.3	111885	521202	499904
Q6GQU6	Leucine-rich repeat and immunoglobulin-like domain-containing nogo receptor-interacting protein 3	Lingo3	14	4	5.5	0.16941	83339.8	73777.7	104945	90214.7	458377	478388
P12382	ATP-dependent 6-phosphofructokinase, liver type	Pfkl	34	2	5.463	0.153962	40041.8	27529.4	70469.4	46104.3	254449	218752
Q8BGN3	Glycerophosphocholine cholinephosphodiesterase ENPP6	Enpp6	46	9	5.43	0.536065	507261	537092	854421	181789	2.91655e+06	3.87325e+06
Q8C419	Probable G-protein coupled receptor 158	Gpr158	31	11	5.346	0.0493459	112731	241790	267114	379891	1.46637e+06	1.29256e+06
Q61001	Laminin subunit alpha-5	Lama5	97	26	5.338	0.239415	700445	960299	1.28897e+06	753150	5.12581e+06	8.92917e+06
Q99020	Heterogeneous nuclear ribonucleoprotein A/B	Hnrnpab	13	2	5.181	0.262647	47880.1	151452	576777	202308	813109	784741
Q91V41	Ras-related protein Rab-14	Rab14	39	6	5.17	0.35049	149960	228600	476008	138971	1.88249e+06	1.18183e+06
P26638	Serine--tRNA ligase, cytoplasmic	Sars1	7	3	5.107	0.16309	51074.4	67996.8	109063	77558.4	529056	347246
P05532	Mast/stem cell growth factor receptor Kit	Kit	17	6	5.051	0.112389	140586	123445	130292	180817	726957	658162
Q5M8N0	CB1 cannabinoid receptor-interacting protein 1	Cnrip1	17	2	4.99	0.0132003	83785.4	97778.2	191531	337011	487873	706689
P00493	Hypoxanthine-guanine phosphoribosyltransferase	Hprt1	7	2	4.984	0.497043	12013.4	81030	269516	25659.2	403889	476153
Q9EQK7	Protein-S-isoprenylcysteine O-methyltransferase	Icmt	8	2	4.932	0.484255	42702.6	15204.7	119088	16507.1	278354	210621
Q8HW98	IgLON family member 5	Iglon5	8	2	4.92	0.0138711	41759.3	74979.3	87244.5	172029	368933	411531
Q61627	Glutamate receptor ionotropic, delta-1	Grid1	31	5	4.904	0.269839	392635	78050.2	116144	137635	569570	660010
Q61361	Brevican core protein	Bcan	119	17	4.89	0.0765463	740218	2.61022e+06	2.53576e+06	2.96869e+06	1.23988e+07	1.32542e+07
Q9QYF9	Protein NDRG3	Ndrg3	14	3	4.857	0.446465	32632.2	206980	404794	58306.7	1.0052e+06	1.02402e+06
Q00PI9	Heterogeneous nuclear ribonucleoprotein U-like protein 2	Hnrnpul2	17	4	4.802	0.445217	65621.3	87153.6	273074	58846.4	535121	418522
Q99PT1	Rho GDP-dissociation inhibitor 1	Arhgdia	70	6	4.733	0.186006	909576	968648	1.67676e+06	1.10009e+06	5.60919e+06	4.58496e+06
P97300	Neuroplastin	Nptn	31	6	4.733	0.224142	114416	4.81758e+06	7.24551e+06	4.39312e+06	2.28031e+07	3.51559e+07
P97927	Laminin subunit alpha-4	Lama4	20	6	4.473	0.437825	1.05547e+06	248678	213174	225209	1.11222e+06	1.84261e+06
P33146	Cadherin-15	Cdh15	30	12	4.468	0.0713155	224434	348213	511737	539345	2.07463e+06	1.55597e+06
Q9WUA2	Phenylalanine--tRNA ligase beta subunit	Farsb	3	2	4.434	0.071568	24361.3	22614.9	15899.4	34328.7	126781	100268
Q62108	Disks large homolog 4	Dlg4	40	10	4.367	0.154989	258549	367048	471411	380267	1.65403e+06	1.60308e+06
P97449	Aminopeptidase N	Anpep	12	6	4.3	0.114947	94600.3	78319.6	105371	118568	411275	406771
Q9CPU4	Microsomal glutathione S-transferase 3	Mgst3	9	2	4.269	0.397122	69953.1	92971.2	147215	52824.9	404486	396940
Q9CYH2	Peroxiredoxin-like 2A	Prxl2a	13	4	4.239	0.411827	112130	193031	290562	84677.2	1.18915e+06	818269
P97370	Sodium/potassium-transporting ATPase subunit beta-3	Atp1b3	77	6	4.201	0.0459372	1.40467e+06	637919	899677	1.5476e+06	3.79677e+06	3.77952e+06
O54734	Dolichyl-diphosphooligosaccharide--protein glycosyltransferase 48 kDa subunit	Ddost	8	3	4.195	0.0186995	82238.4	148379	203356	475076	694408	622484
P27659	60S ribosomal protein L3	Rpl3	9	3	4.188	0.15341	45940.2	93541.4	217758	123849	646962	391784
Q9DCS9	NADH dehydrogenase	Ndufb10	15	4	4.185	0.265479	14665	68160.5	116167	41388.7	285227	354311
Q9CR95	Adaptin ear-binding coat-associated protein 1	Necap1	23	3	4.174	0.532957	22267.6	51198.2	112898	18274.3	213709	251789
O55100	Synaptogyrin-1	Syngr1	22	2	4.148	0.0200104	127518	179768	214862	533259	1.52591e+06	745613
P16546	Spectrin alpha chain, non-erythrocytic 1	Sptan1	463	67	4.13	0.115467	4.16188e+07	3.74907e+07	4.60226e+07	5.56448e+07	1.71888e+08	2.26108e+08
P18894	D-amino-acid oxidase	Dao	10	3	4.114	0.187021	102661	126508	184416	128611	562831	520412
P68040	Receptor of activated protein C kinase 1	Rack1	63	9	4.004	0.42032	244887	767674	878062	237393	3.39459e+06	3.07391e+06
Q8BR86	Kin of IRRE-like protein 3	Kirrel3	6	2	4.001	0.21017	146156	43861.6	39878.7	77679.1	175498	191833
P62331	ADP-ribosylation factor 6	Arf6	14	3	4	0.891341	982535	133712	155155	73707.8	620592	680481
P43006	Excitatory amino acid transporter 2	Slc1a2	175	14	3.966	0.0810309	2.1135e+06	9.05748e+06	1.19261e+07	1.84576e+07	3.97096e+07	3.59261e+07
Q3UHJ0	AP2-associated protein kinase 1	Aak1	6	4	3.963	0.0438015	58976.2	66087.3	48997.4	105053	253805	233733
E9PVD3	Protocadherin-16	Dchs1	19	7	3.869	0.0702757	67517.5	74130.1	35304.9	86606.3	301914	261246
Q9DCT2	NADH dehydrogenase	Ndufs3	9	3	3.865	0.0656813	79047.8	103440	59650.4	118052	305495	330948
Q6WQJ1	Diacylglycerol lipase-alpha	Dagla	10	5	3.812	0.397712	83349.3	113750	196900	69016.7	489829	433670
Q9QYA2	Mitochondrial import receptor subunit TOM40 homolog	Tomm40	4	2	3.782	0.172257	25977	15316.2	11949.1	23416.4	275270	57932.6
P54823	Probable ATP-dependent RNA helicase DDX6	Ddx6	15	3	3.764	0.306442	80841.6	156974	176885	85380.7	688762	590809
Q99PJ0	Neurotrimin	Ntm	99	9	3.758	0.429036	1.27878e+07	2.45795e+06	2.40585e+06	4.59036e+06	9.51002e+06	9.23807e+06
P14115	60S ribosomal protein L27a	Rpl27a	9	3	3.747	0.448749	34448.1	177431	331152	59886.2	747946	664820
Q9D0M5	Dynein light chain 2, cytoplasmic	Dynll2	31	4	3.731	0.659306	52105.6	597797	1.34337e+06	69392.6	2.38289e+06	2.23062e+06
P47857	ATP-dependent 6-phosphofructokinase, muscle type	Pfkm	169	18	3.687	0.228971	1.29019e+06	4.02644e+06	6.36697e+06	3.04156e+06	1.4847e+07	1.55756e+07
P59999	Actin-related protein 2/3 complex subunit 4	Arpc4	9	4	3.684	0.367529	621262	435285	500255	300844	2.21684e+06	1.84301e+06
Q9CZB0	Succinate dehydrogenase cytochrome b560 subunit, mitochondrial	Sdhc	6	3	3.682	0.308779	88177.7	112423	130722	72205.3	1.24447e+06	413891
P07724	Albumin	Alb	288	23	3.68	0.0463892	3.38309e+06	7.57859e+06	8.98431e+06	1.14991e+07	2.78862e+07	3.40046e+07
P51881	ADP/ATP translocase 2	Slc25a5	420	7	3.659	0.347246	2.41588e+06	7.23304e+06	1.18273e+07	3.77653e+06	2.87314e+07	2.6463e+07
B1AXV0	DOMON domain-containing protein FRRS1L	Frrs1l	4	2	3.651	0.20569	53283.6	52227.1	82482	57157.1	278957	194513
P41105	60S ribosomal protein L28	Rpl28	15	2	3.634	0.0862798	51661.3	120716	224846	294922	438732	466575
Q9WV92	Band 4.1-like protein 3	Epb41l3	108	14	3.62	0.211508	809214	1.32363e+06	1.90564e+06	1.1413e+06	4.9921e+06	4.79109e+06
Q64133	Amine oxidase	Maoa	20	5	3.591	0.105222	91708.6	156046	307159	235383	630328	560300
Q60771	Claudin-11	Cldn11	31	2	3.586	0.294883	66903.8	1.46671e+06	3.81714e+06	2.26634e+06	5.27077e+06	5.25976e+06
Q61990	Poly(rC)-binding protein 2	Pcbp2	98	2	3.562	0.143693	281233	647978	843722	613918	2.41416e+06	2.30792e+06
P58389	Serine/threonine-protein phosphatase 2A activator	Ptpa	9	2	3.504	0.322166	34025.2	76160.6	67520.2	34803.8	331113	236601
O88602	Voltage-dependent calcium channel gamma-2 subunit	Cacng2	4	2	3.493	0.11771	42359	199251	282359	251431	695911	1.23531e+06
Q922Q1	Mitochondrial amidoxime reducing component 2	Mtarc2	9	3	3.485	0.242299	97805.1	163835	226366	127060	607898	570990
Q8C0M9	Isoaspartyl peptidase/L-asparaginase	Asrgl1	40	7	3.478	0.707491	216807	788227	2.02178e+06	155243	2.74129e+06	3.4865e+06
Q9CYT6	Adenylyl cyclase-associated protein 2	Cap2	30	3	3.464	0.716904	41100.3	199787	323739	24279.9	733290	692098
Q80T41	Gamma-aminobutyric acid type B receptor subunit 2	Gabbr2	36	8	3.462	0.165077	1.13041e+06	258945	374628	837750	1.54899e+06	1.29711e+06
P47911	60S ribosomal protein L6	Rpl6	26	4	3.454	0.169766	59796.7	373890	641376	661326	1.35467e+06	1.29133e+06
Q99L43	Phosphatidate cytidylyltransferase 2	Cds2	11	2	3.442	0.0575618	72917.7	50105.6	82995.2	107194	306617	251009
Q6WVG3	BTB/POZ domain-containing protein KCTD12	Kctd12	33	7	3.441	0.281653	193034	743799	1.09502e+06	431919	3.00106e+06	2.55915e+06
P26041	Moesin	Msn	28	2	3.431	0.171723	198213	347545	534896	342247	1.35096e+06	1.19256e+06
P53994	Ras-related protein Rab-2A	Rab2a	43	4	3.423	0.301459	58996.5	841269	1.10641e+06	408157	2.88801e+06	2.87953e+06
Q6ZWN5	40S ribosomal protein S9	Rps9	12	3	3.422	0.44965	68566.3	476394	933736	161820	1.91609e+06	1.63023e+06
Q99JG2	G-protein coupled receptor 37-like 1	Gpr37l1	37	3	3.42	0.128848	130409	298887	510707	368775	1.02207e+06	1.1516e+06
Q8VDM4	26S proteasome non-ATPase regulatory subunit 2	Psmd2	6	3	3.418	0.21552	26469	114270	224556	124808	416332	390612
P63005	Platelet-activating factor acetylhydrolase IB subunit beta	Pafah1b1	39	6	3.412	0.519179	76092	436062	792051	119590	1.48787e+06	1.52369e+06
Q3UHD6	Sorting nexin-27	Snx27	15	2	3.4	0.687225	22510.1	26826.1	78883.8	11467.4	146256	91209.3
Q9DB41	Mitochondrial glutamate carrier 2	Slc25a18	57	2	3.389	0.373581	71461	113685	185787	69235.8	385255	468517
Q9EPW0	Inositol polyphosphate-4-phosphatase type I A	Inpp4a	4	2	3.389	0.410109	126120	156318	474407	160544	533120	529703
Q8QZS1	3-hydroxyisobutyryl-CoA hydrolase, mitochondrial	Hibch	7	2	3.385	0.366891	47575.6	160920	366168	107611	558161	544717
P61255	60S ribosomal protein L26	Rpl26	9	3	3.384	0.578561	81491.5	202540	377287	66852.8	722644	685426
Q9WUM5	Succinate--CoA ligase	Suclg1	88	8	3.382	0.350772	815250	1.47335e+06	2.24735e+06	871280	6.07672e+06	4.98326e+06
Q61885	Myelin-oligodendrocyte glycoprotein	Mog	99	6	3.382	0.243714	308120	2.85827e+06	5.3177e+06	2.95603e+06	9.66622e+06	1.10224e+07
Q9CY64	Biliverdin reductase A	Blvra	10	3	3.382	0.184511	30437.3	38051.2	70062.2	43189.8	129013	128676
Q9R0P3	S-formylglutathione hydrolase	Esd	14	2	3.358	0.425643	76787.8	145341	202449	66895.3	557503	488014
Q8R001	Microtubule-associated protein RP/EB family member 2	Mapre2	9	4	3.335	0.225973	60637.1	101043	109996	75028.1	442150	336977
Q9Z2H5	Band 4.1-like protein 1	Epb41l1	23	5	3.33	0.317017	113895	210896	234299	117036	806317	702232
Q9JLZ3	Methylglutaconyl-CoA hydratase, mitochondrial	Auh	79	7	3.324	0.205189	193816	1.36414e+06	1.92786e+06	965447	4.53383e+06	1.36277e+07
Q91V14	Solute carrier family 12 member 5	Slc12a5	101	12	3.322	0.168299	1.22721e+06	2.2214e+06	5.48861e+06	3.53938e+06	8.51378e+06	7.3785e+06
Q9D8E6	60S ribosomal protein L4	Rpl4	19	4	3.299	0.177223	71187.3	184237	271282	167288	651581	607849
Q9CY27	Very-long-chain enoyl-CoA reductase	Tecr	3	2	3.292	0.147386	15216.2	52806.3	60866.9	45492.5	173837	200198
Q9CQD1	Ras-related protein Rab-5A	Rab5a	24	2	3.273	0.209164	83804.4	364465	607314	337755	1.19279e+06	1.3396e+06
Q9CQ54	NADH dehydrogenase	Ndufc2	11	2	3.217	0.413511	47246.5	119532	116034	40426.9	373248	545160
Q8C8R3	Ankyrin-2	Ank2	116	26	3.212	0.0693278	785391	2.11802e+06	2.82496e+06	3.22951e+06	8.57211e+06	6.80313e+06
P46096	Synaptotagmin-1	Syt1	91	10	3.208	0.097581	693196	1.86281e+06	2.68351e+06	2.45687e+06	7.18154e+06	5.97505e+06
P48722	Heat shock 70 kDa protein 4L	Hspa4l	95	13	3.193	0.177835	572935	2.22783e+06	2.96326e+06	1.91693e+06	2.36992e+07	7.11363e+06
O88844	Isocitrate dehydrogenase	Idh1	16	2	3.193	0.154203	83723.9	597314	711830	699093	2.16543e+06	1.90697e+06
Q9D2P8	Myelin-associated oligodendrocyte basic protein	Mobp	24	2	3.192	0.219407	26635.5	149709	265211	164573	477929	499919
P55088	Aquaporin-4	Aqp4	29	4	3.19	0.0402306	1.24733e+06	1.63813e+06	2.12551e+06	3.5059e+06	5.22494e+06	1.0448e+07
Q64332	Synapsin-2	Syn2	121	12	3.182	0.468309	720679	3.04329e+06	5.5578e+06	1.09335e+06	1.22496e+07	9.68397e+06
Q8BWF0	Succinate-semialdehyde dehydrogenase, mitochondrial	Aldh5a1	26	6	3.173	0.246411	136480	407697	472779	250289	1.29358e+06	1.37862e+06
Q61598	Rab GDP dissociation inhibitor beta	Gdi2	91	7	3.149	0.275954	359704	1.05968e+06	1.66337e+06	728926	3.5522e+06	3.33737e+06
O70325	Phospholipid hydroperoxide glutathione peroxidase	Gpx4	15	3	3.149	0.336013	66532.5	284613	302745	113895	896339	984115
Q91V61	Sideroflexin-3	Sfxn3	56	9	3.143	0.163947	225700	947022	1.23583e+06	870414	3.47893e+06	2.97651e+06
P28651	Carbonic anhydrase-related protein	Ca8	150	7	3.141	0.176886	2.65526e+06	3.72768e+06	7.02825e+06	4.31639e+06	1.17082e+07	1.28198e+07
Q91WC3	Long-chain-fatty-acid--CoA ligase 6	Acsl6	27	7	3.099	0.415819	176303	390038	815480	226383	1.65976e+06	1.2086e+06
Q9EPJ9	ADP-ribosylation factor GTPase-activating protein 1	Arfgap1	3	2	3.089	0.895156	125445	235262	69924.5	20475.9	411610	387476
Q9D1A2	Cytosolic non-specific dipeptidase	Cndp2	8	2	3.081	0.394447	49680.7	56108.7	31862.5	24481.7	153070	202909
Q9JME5	AP-3 complex subunit beta-2	Ap3b2	13	3	3.077	0.54958	24165.7	33189.8	75555.9	20033.9	107893	102115
Q9D1R9	60S ribosomal protein L34	Rpl34	4	2	3.074	0.390885	13787.7	221659	345755	81604.3	699880	681391
P70202	Latexin	Lxn	29	4	3.068	0.261547	622242	1.54558e+06	1.88459e+06	962143	4.74244e+06	6.15902e+06
Q8VHQ9	Acyl-coenzyme A thioesterase 11	Acot11	12	3	3.052	0.342874	57061.3	255677	447994	146777	862688	780408
Q6ZWU9	40S ribosomal protein S27	Rps27	8	2	3.05	0.0467291	199632	350436	454643	517559	1.06871e+06	1.07383e+06
Q921F4	Heterogeneous nuclear ribonucleoprotein L-like	Hnrnpll	18	4	3.047	0.69426	59666.7	180759	372851	42419.3	650256	550744
P97807	Fumarate hydratase, mitochondrial	Fh	29	7	3.027	0.223027	187478	361204	1.11828e+06	853079	1.21208e+06	1.09342e+06
P70296	Phosphatidylethanolamine-binding protein 1	Pebp1	97	6	3.022	0.0898752	1.27462e+06	2.25203e+06	3.10682e+06	2.89376e+06	6.80578e+06	9.86201e+06
Q640R3	Hepatocyte cell adhesion molecule	Hepacam	34	7	3.02	0.170202	142628	577220	900503	668174	1.92346e+06	1.74336e+06
O35633	Vesicular inhibitory amino acid transporter	Slc32a1	32	6	2.981	0.0373894	187330	305255	446216	667600	951512	909870
P48774	Glutathione S-transferase Mu 5	Gstm5	46	4	2.961	0.313206	95618.6	622536	755872	289688	1.8433e+06	1.96444e+06
P20917	Myelin-associated glycoprotein	Mag	68	10	2.955	0.0306347	2.65989e+06	1.93396e+06	3.65325e+06	4.60238e+06	7.86091e+06	1.00244e+07
Q9JKD3	Secretory carrier-associated membrane protein 5	Scamp5	36	2	2.953	0.316915	29849.9	619927	1.01459e+06	417575	1.83058e+06	2.0443e+06
Q9D8B7	Junctional adhesion molecule C	Jam3	12	2	2.936	0.0217984	160332	110731	205548	337304	470668	792167
P70704	Phospholipid-transporting ATPase IA	Atp8a1	9	4	2.918	0.145688	56252.2	140125	211576	150050	408855	706284
Q9D172	Glutamine amidotransferase-like class 1 domain-containing protein 3, mitochondrial	Gatd3	24	7	2.914	0.138202	165269	556904	711092	587297	1.69511e+06	1.62293e+06
Q60854	Serpin B6	Serpinb6	4	2	2.914	0.508851	26646.9	318345	690349	83822.6	927601	1.29471e+06
Q8BGH2	Sorting and assembly machinery component 50 homolog	Samm50	42	7	2.911	0.0403132	92568.9	193897	235884	405099	564497	592067
Q9Z127	Large neutral amino acids transporter small subunit 1	Slc7a5	17	3	2.906	0.0873305	115412	245303	317581	298421	712792	787614
Q8K0S0	Phytanoyl-CoA hydroxylase-interacting protein	Phyhip	47	4	2.904	0.443196	96608.3	415469	622958	150170	1.48229e+06	1.20643e+06
Q8CHH9	Septin-8	Septin8	88	6	2.865	0.256792	114240	462471	695840	340921	1.41625e+06	1.3252e+06
Q9Z0X1	Apoptosis-inducing factor 1, mitochondrial	Aifm1	17	3	2.859	0.451459	42181.6	84025.7	234583	59852.3	370634	240235
Q9JJZ2	Tubulin alpha-8 chain	Tuba8	438	4	2.855	0.323068	111205	445550	641625	249812	1.27221e+06	1.3371e+06
P17809	Solute carrier family 2, facilitated glucose transporter member 1	Slc2a1	26	3	2.853	0.543246	8.61401e+06	471512	732992	7.08223e+06	2.09107e+06	1.60992e+06
P56135	ATP synthase subunit f, mitochondrial	Atp5mf	29	2	2.847	0.218054	11983.5	457374	624376	1.82712e+06	1.20765e+06	1.30211e+06
P62754	40S ribosomal protein S6	Rps6	14	2	2.815	0.0704168	196703	259542	423301	388533	839033	730492
Q9D1G1	Ras-related protein Rab-1B	Rab1b	31	4	2.804	0.382326	85977.5	640705	1.06706e+06	306976	1.91641e+06	1.79625e+06
P62281	40S ribosomal protein S11	Rps11	34	6	2.801	0.212435	332601	953809	1.49705e+06	883322	2.6873e+06	2.67186e+06
Q9CXW4	60S ribosomal protein L11	Rpl11	17	4	2.798	0.294202	103708	352304	482466	207620	985849	1.21633e+06
Q9R0Q6	Actin-related protein 2/3 complex subunit 1A	Arpc1a	12	4	2.797	0.116273	327338	597569	1.00766e+06	802780	1.85916e+06	1.67166e+06
Q9Z1Q2	Phosphatidylserine lipase ABHD16A	Abhd16a	23	6	2.793	0.477179	86538.2	307719	602588	136692	1.03724e+06	859341
Q9R1T4	Septin-6	Septin6	65	3	2.791	0.649845	66904.5	170941	274135	49796.7	481085	477144
Q80ZF8	Adhesion G protein-coupled receptor B3	Adgrb3	14	5	2.784	0.183223	108672	83022.7	93738.2	105417	586649	261013
O88935	Synapsin-1	Syn1	116	14	2.78	0.223537	985568	2.96056e+06	4.99478e+06	2.62772e+06	1.12358e+07	8.22946e+06
Q8BYR5	Calcium-dependent secretion activator 2	Cadps2	30	3	2.779	0.0775374	37356.3	85420.1	130089	138217	473575	237378
Q99JR1	Sideroflexin-1	Sfxn1	7	3	2.773	0.576947	105905	235066	385845	84743.1	784985	651817
P45376	Aldo-keto reductase family 1 member B1	Akr1b1	9	3	2.765	0.235777	75478.8	229304	369966	188415	634031	833811
P10630	Eukaryotic initiation factor 4A-II	Eif4a2	61	3	2.762	0.605022	113547	734606	1.55985e+06	171157	2.69294e+06	2.02888e+06
Q9ERD7	Tubulin beta-3 chain	Tubb3	936	6	2.754	0.453779	465574	1.85765e+06	2.18717e+06	607376	5.11517e+06	5.52152e+06
Q6PDL0	Cytoplasmic dynein 1 light intermediate chain 2	Dync1li2	11	2	2.744	0.439424	38260.1	51243	24930.3	19100.4	162350	104990
Q9WV55	Vesicle-associated membrane protein-associated protein A	Vapa	26	5	2.744	0.322987	120782	350728	445554	188461	1.17375e+06	962237
Q8VDN2	Sodium/potassium-transporting ATPase subunit alpha-1	Atp1a1	1296	25	2.731	0.107832	2.10922e+07	2.2354e+07	3.13416e+07	2.83782e+07	6.20414e+07	6.10578e+07
Q8C0E2	Vacuolar protein sorting-associated protein 26B	Vps26b	21	3	2.715	0.23051	152594	423426	667368	367510	1.23437e+06	1.14954e+06
O88741	Ganglioside-induced differentiation-associated protein 1	Gdap1	12	3	2.71	0.0429453	60843.3	43585.9	92480.2	163715	164874	178370
P60335	Poly(rC)-binding protein 1	Pcbp1	90	4	2.703	0.067379	1.40232e+06	1.87866e+06	2.62669e+06	2.55216e+06	5.07774e+06	5.44852e+06
P47757	F-actin-capping protein subunit beta	Capzb	37	7	2.699	0.165696	772394	768550	1.13578e+06	892244	2.08457e+06	2.28369e+06
O08709	Peroxiredoxin-6	Prdx6	94	10	2.694	0.263342	293873	1.77105e+06	2.22416e+06	1.16613e+06	4.77111e+06	4.83768e+06
Q9CQN1	Heat shock protein 75 kDa, mitochondrial	Trap1	44	2	2.694	0.206013	109109	1.72174e+06	1.97906e+06	2.74079e+06	5.11336e+06	4.63799e+06
Q91YQ5	Dolichyl-diphosphooligosaccharide--protein glycosyltransferase subunit 1	Rpn1	12	4	2.69	0.297132	76142.7	183153	284635	130243	542814	492727
Q8R0S2	IQ motif and SEC7 domain-containing protein 1	Iqsec1	12	6	2.676	0.0557308	70439.5	158311	180684	221198	604225	423621
P84091	AP-2 complex subunit mu	Ap2m1	85	13	2.675	0.213942	700709	2.81897e+06	3.84788e+06	2.39085e+06	7.98359e+06	7.54185e+06
Q9CR62	Mitochondrial 2-oxoglutarate/malate carrier protein	Slc25a11	56	8	2.659	0.493517	286165	995400	2.11482e+06	441625	3.82101e+06	2.64653e+06
P62702	40S ribosomal protein S4, X isoform	Rps4x	14	4	2.638	0.27145	209024	376107	534679	288472	1.07048e+06	992298
P31650	Sodium- and chloride-dependent GABA transporter 3	Slc6a11	35	4	2.632	0.203555	168790	1.2462e+06	1.52241e+06	1.133e+06	4.13291e+06	3.28008e+06
P62717	60S ribosomal protein L18a	Rpl18a	7	2	2.632	0.314843	41208.1	254315	352590	149540	669250	676754
P51660	Peroxisomal multifunctional enzyme type 2	Hsd17b4	18	5	2.626	0.392368	79900.3	171884	204756	86902.6	463079	451295
P15105	Glutamine synthetase	Glul	247	15	2.624	0.413037	1.50946e+06	9.29076e+06	1.22874e+07	3.30525e+06	2.9798e+07	2.43794e+07
E9Q557	Desmoplakin	Dsp	16	7	2.612	0.689948	127036	359312	905113	123049	1.16463e+06	938483
P48962	ADP/ATP translocase 1	Slc25a4	627	10	2.609	0.047935	5.34739e+07	6.38838e+07	8.59364e+07	9.2222e+07	1.66702e+08	1.73532e+08
Q8K183	Pyridoxal kinase	Pdxk	35	5	2.596	0.466781	129059	1.09713e+06	2.04669e+06	425776	2.84761e+06	3.11946e+06
P62823	Ras-related protein Rab-3C	Rab3c	44	2	2.593	0.220776	102550	1.0791e+06	1.47138e+06	1.31687e+06	3.41807e+06	2.79778e+06
P62827	GTP-binding nuclear protein Ran	Ran	84	7	2.586	0.12534	1.96776e+06	3.28928e+06	4.36105e+06	3.5308e+06	8.50631e+06	9.58217e+06
P16330	2',3'-cyclic-nucleotide 3'-phosphodiesterase	Cnp	534	29	2.586	0.21547	1.84779e+07	3.52242e+07	5.07424e+07	3.0852e+07	9.81923e+07	9.10779e+07
P16858	Glyceraldehyde-3-phosphate dehydrogenase	Gapdh	566	18	2.574	0.050342	5.11177e+07	6.78882e+07	9.28291e+07	1.00384e+08	1.74747e+08	2.18764e+08
P14094	Sodium/potassium-transporting ATPase subunit beta-1	Atp1b1	289	12	2.572	0.195237	5.25165e+06	1.98689e+07	2.53378e+07	1.73647e+07	5.11102e+07	5.41597e+07
Q9DC70	NADH dehydrogenase	Ndufs7	24	2	2.571	0.643411	27798.2	512585	809600	56423.2	1.31811e+06	1.47813e+06
Q9Z1G4	V-type proton ATPase 116 kDa subunit a 1	Atp6v0a1	142	17	2.567	0.258832	572107	3.41822e+06	5.81136e+06	3.07131e+06	1.18097e+07	8.77463e+06
P61294	Ras-related protein Rab-6B	Rab6b	20	3	2.566	0.140466	128453	359661	492188	417947	949705	923024
P35979	60S ribosomal protein L12	Rpl12	39	5	2.566	0.221538	149971	950694	1.31233e+06	985019	2.55875e+06	2.43934e+06
Q8VHK5	Membrane protein MLC1	Mlc1	9	3	2.564	0.24102	19117.2	273024	402865	409911	799805	699940
O89112	Glutathione S-transferase LANCL1	Lancl1	15	2	2.562	0.503203	8736.76	145614	210121	32504.4	388828	373059
Q9EP69	Phosphatidylinositol-3-phosphatase SAC1	Sacm1l	20	3	2.562	0.119421	151643	355750	501993	422631	1.12063e+06	911417
Q791V5	Mitochondrial carrier homolog 2	Mtch2	73	7	2.556	0.290763	238094	2.19258e+06	3.25658e+06	1.57947e+06	6.65725e+06	5.60347e+06
P62908	40S ribosomal protein S3	Rps3	45	8	2.553	0.417496	288545	688074	1.26571e+06	407463	2.27623e+06	1.7564e+06
Q60930	Voltage-dependent anion-selective channel protein 2	Vdac2	223	12	2.548	0.273809	710575	1.2603e+07	1.5576e+07	1.06731e+07	3.41697e+07	3.21085e+07
O88342	WD repeat-containing protein 1	Wdr1	90	12	2.535	0.255691	406637	2.64466e+06	3.4191e+06	2.03306e+06	6.78169e+06	6.7052e+06
P70349	Adenosine 5'-monophosphoramidase HINT1	Hint1	16	2	2.533	0.320548	34924.3	263766	367500	148214	775915	668230
P12658	Calbindin	Calb1	120	11	2.533	0.341491	2.79351e+06	3.68159e+06	5.1225e+06	2.68971e+06	1.12234e+07	9.32546e+06
Q60668	Heterogeneous nuclear ribonucleoprotein D0	Hnrnpd	39	4	2.526	0.151819	198553	923003	1.11446e+06	1.10186e+06	2.70547e+06	2.33192e+06
Q0VEJ0	Centrosomal protein of 76 kDa	Cep76	9	3	2.516	0.066988	60673.9	152636	200687	304014	526315	384043
Q9JM76	Actin-related protein 2/3 complex subunit 3	Arpc3	7	2	2.513	0.181977	119229	145878	153412	138049	414007	366573
B1AWN6	Sodium channel protein type 2 subunit alpha	Scn2a	13	4	2.513	0.153629	55098	150895	245446	221665	408429	379173
P63137	Gamma-aminobutyric acid receptor subunit beta-2	Gabrb2	17	3	2.512	0.638596	113680	194288	256719	61909	488075	653978
P49312	Heterogeneous nuclear ribonucleoprotein A1	Hnrnpa1	39	5	2.506	0.252459	148387	291446	501794	258473	1.03438e+06	730303
P61027	Ras-related protein Rab-10	Rab10	18	3	2.501	0.137419	97456	411122	448587	453026	1.14035e+06	1.02817e+06
P23242	Gap junction alpha-1 protein	Gja1	17	5	2.484	0.159778	97081.3	480748	725068	1.09998e+06	1.41131e+06	1.19423e+06
P63101	14-3-3 protein zeta/delta	Ywhaz	169	9	2.483	0.0554121	2.62408e+06	4.41709e+06	6.14017e+06	6.74568e+06	1.09677e+07	1.24913e+07
Q9WUB3	Glycogen phosphorylase, muscle form	Pygm	76	7	2.483	0.341455	121299	583340	782249	308949	1.56663e+06	1.44815e+06
G5E829	Plasma membrane calcium-transporting ATPase 1	Atp2b1	214	6	2.482	0.304508	216151	1.24015e+06	1.71324e+06	805778	3.08929e+06	3.07767e+06
Q91YR1	Twinfilin-1	Twf1	8	3	2.478	0.581132	27006.9	62100.5	98698.5	24785.9	153901	163960
Q9R0K7	Plasma membrane calcium-transporting ATPase 2	Atp2b2	445	29	2.472	0.161053	6.24851e+06	1.511e+07	2.20348e+07	1.62539e+07	4.0788e+07	3.73494e+07
P67778	Prohibitin 1	Phb1	37	7	2.462	0.244526	318439	747073	1.05325e+06	596077	1.83925e+06	1.96761e+06
P32037	Solute carrier family 2, facilitated glucose transporter member 3	Slc2a3	18	3	2.45	0.24902	80419.6	760830	898854	631891	1.94344e+06	1.86418e+06
O35098	Dihydropyrimidinase-related protein 4	Dpysl4	80	14	2.444	0.195743	450746	1.23527e+06	1.80271e+06	1.12725e+06	4.31817e+06	3.01904e+06
P62242	40S ribosomal protein S8	Rps8	18	6	2.436	0.636884	174621	518964	851199	161178	1.40193e+06	1.26409e+06
P11276	Fibronectin	Fn1	45	10	2.435	0.165826	127434	337396	606728	419421	821577	1.58296e+06
P19783	Cytochrome c oxidase subunit 4 isoform 1, mitochondrial	Cox4i1	16	6	2.431	0.564597	113216	214321	338968	99529.4	548297	520908
Q8C854	Myelin expression factor 2	Myef2	14	3	2.428	0.401706	46008.2	29583	87536.6	31939.1	215172	111701
P60202	Myelin proteolipid protein	Plp1	409	7	2.426	0.136723	4.64186e+07	9.56587e+07	1.41524e+08	1.13059e+08	2.32106e+08	2.46503e+08
Q3UMR5	Calcium uniporter protein, mitochondrial	Mcu	8	3	2.426	0.156456	46905	137800	194382	145561	483063	334353
Q8BGT8	Phytanoyl-CoA hydroxylase-interacting protein-like	Phyhipl	48	5	2.423	0.202441	160116	845377	1.22907e+06	1.15062e+06	2.04867e+06	2.18192e+06
Q9D8N0	Elongation factor 1-gamma	Eef1g	31	6	2.419	0.585057	90553.7	701803	1.2024e+06	164719	2.04045e+06	1.69742e+06
Q99L47	Hsc70-interacting protein	St13	5	2	2.418	0.729427	32009.3	21892.9	59103	9271.22	166576	77399.5
Q9QZF2	Glypican-1	Gpc1	9	4	2.417	0.483744	62019.3	74716.3	60618.6	33757.5	271600	149921
O08756	3-hydroxyacyl-CoA dehydrogenase type-2	Hsd17b10	27	3	2.412	0.0688255	277137	291939	480126	442315	776672	704057
Q8C1B7	Septin-11	Septin11	100	6	2.404	0.373717	314077	4.41572e+06	6.15737e+06	2.10812e+06	1.10663e+07	1.06167e+07
Q8R127	Saccharopine dehydrogenase-like oxidoreductase	Sccpdh	7	3	2.402	0.705485	89071.8	256700	375796	62186.8	679322	616675
P31648	Sodium- and chloride-dependent GABA transporter 1	Slc6a1	62	5	2.4	0.191157	175032	1.4156e+06	1.60643e+06	1.53413e+06	4.45903e+06	3.39675e+06
Q9CQR4	Acyl-coenzyme A thioesterase 13	Acot13	15	2	2.394	0.230423	349440	371727	488382	360583	890014	1.0281e+06
P12970	60S ribosomal protein L7a	Rpl7a	13	4	2.394	0.489865	130974	316723	622685	170456	1.02662e+06	758265
Q9D6M3	Mitochondrial glutamate carrier 1	Slc25a22	90	6	2.388	0.159703	1.13882e+06	3.3417e+06	4.36507e+06	3.56861e+06	8.14699e+06	7.98113e+06
Q9CVB6	Actin-related protein 2/3 complex subunit 2	Arpc2	7	2	2.384	0.591474	35616.1	256236	450024	54652	965346	610848
Q63959	Potassium voltage-gated channel subfamily C member 3	Kcnc3	20	2	2.376	0.251757	150527	669038	897847	535080	1.6353e+06	1.58996e+06
Q6PHN9	Ras-related protein Rab-35	Rab35	32	4	2.364	0.264591	117795	1.97913e+06	3.15309e+06	3.50617e+06	4.67888e+06	5.01578e+06
P62746	Rho-related GTP-binding protein RhoB	Rhob	38	2	2.35	0.0518493	113561	185560	181555	222711	426651	468538
Q922B2	Aspartate--tRNA ligase, cytoplasmic	Dars1	32	10	2.345	0.208553	244793	527451	774021	493608	1.31875e+06	1.23687e+06
Q99JP6	Homer protein homolog 3	Homer3	33	8	2.337	0.259846	324026	573488	676102	423034	1.44747e+06	1.34016e+06
Q9CWZ7	Gamma-soluble NSF attachment protein	Napg	15	4	2.336	0.0939828	261482	271891	272051	335253	635239	654338
Q9R0P5	Destrin	Dstn	20	4	2.336	0.684627	35114.3	780309	1.0608e+06	66601.7	1.82717e+06	1.82301e+06
Q9Z1S5	Neuronal-specific septin-3	Septin3	19	3	2.336	0.81168	115615	929731	1.32172e+06	76283.1	2.46195e+06	2.17181e+06
Q8BIJ6	Isoleucine--tRNA ligase, mitochondrial	Iars2	3	3	2.332	0.636899	56448	99175.8	161429	44505.2	231247	235380
Q9CZC8	Secernin-1	Scrn1	47	9	2.328	0.398273	252088	594790	805484	334404	1.38475e+06	1.41825e+06
Q9QYC0	Alpha-adducin	Add1	56	7	2.319	0.316791	402726	1.30987e+06	1.82579e+06	838541	3.4297e+06	3.03721e+06
Q8BG39	Synaptic vesicle glycoprotein 2B	Sv2b	38	8	2.315	0.538671	404803	617792	1.11547e+06	340813	2.09402e+06	1.43023e+06
Q7TQI3	Ubiquitin thioesterase OTUB1	Otub1	27	4	2.314	0.522459	95955.1	605640	943102	187407	1.67306e+06	1.40171e+06
Q8VEK3	Heterogeneous nuclear ribonucleoprotein U	Hnrnpu	130	14	2.308	0.0909077	430017	3.26712e+06	3.71156e+06	4.50422e+07	7.32225e+06	7.54054e+06
Q9WUM4	Coronin-1C	Coro1c	23	5	2.307	0.256049	126208	538634	746879	450396	1.24266e+06	1.27608e+06
P63011	Ras-related protein Rab-3A	Rab3a	139	6	2.3	0.0522229	4.79381e+06	7.60785e+06	9.88455e+06	1.09274e+07	1.76275e+07	1.74982e+07
P17426	AP-2 complex subunit alpha-1	Ap2a1	131	16	2.297	0.517521	1.46523e+06	2.67654e+06	3.70768e+06	1.24531e+06	7.72123e+06	6.14737e+06
Q8C522	Endonuclease domain-containing 1 protein	Endod1	10	3	2.296	0.527057	89467.7	51038.2	181446	46602.9	422646	205438
P05132	cAMP-dependent protein kinase catalytic subunit alpha	Prkaca	15	2	2.285	0.24697	32906.2	333425	593079	613864	992748	761848
Q8R0Y6	Cytosolic 10-formyltetrahydrofolate dehydrogenase	Aldh1l1	68	14	2.282	0.158681	561189	1.14929e+06	1.57121e+06	1.16245e+06	3.06648e+06	2.62279e+06
P84096	Rho-related GTP-binding protein RhoG	Rhog	29	3	2.28	0.672637	55908.7	211436	278489	49475.1	483233	482066
Q91YT0	NADH dehydrogenase	Ndufv1	72	11	2.278	0.0680313	1.39034e+06	2.50444e+06	3.31085e+06	3.75668e+06	5.94979e+06	5.70453e+06
Q61553	Fascin	Fscn1	27	5	2.274	0.354922	396326	758732	1.01011e+06	491033	1.72565e+06	1.85523e+06
P47708	Rabphilin-3A	Rph3a	10	4	2.272	0.312904	55627.1	205697	336389	158885	523564	467403
O88998	Noelin	Olfm1	40	7	2.264	0.295411	172643	5.95274e+06	7.958e+06	6.30651e+06	1.34758e+07	1.67724e+07
Q9D6F9	Tubulin beta-4A chain	Tubb4a	1241	4	2.263	0.139306	934520	5.34941e+06	6.24761e+06	9.96628e+06	1.21039e+07	1.75671e+07
P46097	Synaptotagmin-2	Syt2	68	5	2.26	0.416516	180041	689251	1.12563e+06	386419	1.55793e+06	1.67664e+06
P60766	Cell division control protein 42 homolog	Cdc42	78	5	2.26	0.342536	615550	1.22333e+06	1.5148e+06	776568	2.76459e+06	2.83501e+06
Q9JIS5	Synaptic vesicle glycoprotein 2A	Sv2a	72	9	2.252	0.0512257	1.1885e+06	1.29087e+06	1.64651e+06	1.79246e+06	2.9073e+06	3.1732e+06
P09411	Phosphoglycerate kinase 1	Pgk1	128	18	2.251	0.252353	4.0335e+06	5.9873e+06	6.52909e+06	4.60251e+06	1.60563e+07	1.3475e+07
Q9JHI5	Isovaleryl-CoA dehydrogenase, mitochondrial	Ivd	23	6	2.249	0.218246	323981	543394	993294	597185	1.69981e+06	1.22215e+06
P38647	Stress-70 protein, mitochondrial	Hspa9	31	6	2.24	0.326048	124171	551292	807567	355205	1.46312e+06	1.23464e+06
P14148	60S ribosomal protein L7	Rpl7	3	2	2.238	0.526219	39534.1	225995	373480	75881.6	637681	505881
Q9WVA3	Mitotic checkpoint protein BUB3	Bub3	2	2	2.236	0.180002	24870	58677.1	77294	55481	144370	131200
Q68FL4	Putative adenosylhomocysteinase 3	Ahcyl2	114	3	2.235	0.34656	57541	805233	740021	319808	1.65418e+06	1.91997e+06
Q61701	ELAV-like protein 4	Elavl4	21	3	2.23	0.504335	122125	787949	1.06264e+06	253818	1.80293e+06	1.7568e+06
P08551	Neurofilament light polypeptide	Nefl	165	12	2.228	0.368748	1.29903e+06	3.02421e+06	5.03782e+06	2.12618e+06	7.80777e+06	6.73924e+06
Q5PR73	GTP-binding protein Di-Ras2	Diras2	6	2	2.226	0.174681	37614.7	98486.4	134697	101296	219251	245940
P18872	Guanine nucleotide-binding protein G(o) subunit alpha	Gnao1	233	11	2.215	0.250076	2.7988e+06	1.60311e+07	2.07417e+07	1.46911e+07	3.60143e+07	3.55046e+07
P62631	Elongation factor 1-alpha 2	Eef1a2	222	4	2.214	0.415995	55033.3	1.25064e+06	1.5431e+06	412853	3.11621e+06	2.76902e+06
O08553	Dihydropyrimidinase-related protein 2	Dpysl2	477	21	2.205	0.174384	9.00874e+06	1.45693e+07	1.77949e+07	1.34801e+07	3.71659e+07	3.21194e+07
Q9D051	Pyruvate dehydrogenase E1 component subunit beta, mitochondrial	Pdhb	96	10	2.195	0.224656	1.24828e+06	4.06276e+06	5.60452e+06	3.60807e+06	1.04451e+07	8.91798e+06
P97427	Dihydropyrimidinase-related protein 1	Crmp1	203	8	2.195	0.274829	281722	2.63669e+06	3.93287e+06	2.56352e+06	7.51943e+06	5.78689e+06
Q8K386	Ras-related protein Rab-15	Rab15	35	2	2.192	0.736003	45704.9	1.13545e+06	1.71242e+06	72701.1	2.99263e+06	2.48875e+06
P40124	Adenylyl cyclase-associated protein 1	Cap1	40	7	2.187	0.520676	538221	902559	3.0241e+06	996546	2.6641e+06	1.97416e+06
P62814	V-type proton ATPase subunit B, brain isoform	Atp6v1b2	159	16	2.187	0.247321	1.27793e+06	2.87522e+06	3.8359e+06	2.23191e+06	8.41316e+06	6.2889e+06
Q4V9Z5	Seizure 6-like protein 2	Sez6l2	5	2	2.181	0.199785	26492.3	38585.5	14080.3	25702.2	57778.7	65597.2
P35980	60S ribosomal protein L18	Rpl18	19	3	2.181	0.644519	78089.6	504069	807221	114841	1.20777e+06	1.09913e+06
P47754	F-actin-capping protein subunit alpha-2	Capza2	38	4	2.18	0.511299	714191	906316	1.12048e+06	515016	2.18512e+06	1.97538e+06
P10853	Histone H2B type 1-F/J/L	H2bc7	40	3	2.177	0.307981	321834	4.22763e+06	7.5717e+06	5.69873e+06	9.2023e+06	1.00439e+07
Q60932	Voltage-dependent anion-selective channel protein 1	Vdac1	298	13	2.17	0.332095	2.91825e+06	1.893e+07	2.58445e+07	1.22882e+07	4.10728e+07	4.23597e+07
P61205	ADP-ribosylation factor 3	Arf3	106	7	2.165	0.0827777	2.8294e+06	3.72513e+06	4.58658e+06	4.85011e+06	1.20286e+07	8.06537e+06
Q9JJV2	Profilin-2	Pfn2	19	3	2.151	0.275843	82409.2	376921	480599	278444	810590	860186
Q3TXX4	Vesicular glutamate transporter 1	Slc17a7	88	7	2.149	0.455429	1.66562e+06	5.80676e+06	1.19136e+07	3.42249e+06	1.79498e+07	1.24786e+07
P32883	GTPase KRas	Kras	35	3	2.146	0.117955	389616	670297	755636	698707	1.4386e+06	2.03773e+06
Q8BVE3	V-type proton ATPase subunit H	Atp6v1h	29	7	2.14	0.633846	225145	592480	841957	195836	1.49727e+06	1.2677e+06
P60487	Chronophin	Pdxp	30	5	2.136	0.504008	152168	633602	771178	226537	1.3536e+06	1.37624e+06
Q9CR68	Cytochrome b-c1 complex subunit Rieske, mitochondrial	Uqcrfs1	25	5	2.124	0.907266	500138	426177	711984	162660	1.06221e+06	1.13409e+06
Q3U0V1	Far upstream element-binding protein 2	Khsrp	13	3	2.121	0.232357	96358.5	284635	241131	183665	559580	511468
Q9DBF1	Alpha-aminoadipic semialdehyde dehydrogenase	Aldh7a1	26	7	2.121	0.669558	85532.5	245040	339546	64500.7	519659	714490
Q80TZ3	Putative tyrosine-protein phosphatase auxilin	Dnajc6	7	4	2.117	0.0419097	63138.2	89288.9	107030	118725	199008	189004
Q8VEM8	Phosphate carrier protein, mitochondrial	Slc25a3	123	10	2.115	0.462738	6.28629e+06	7.20147e+06	9.67774e+06	5.045e+06	1.60598e+07	1.52283e+07
Q02357	Ankyrin-1	Ank1	26	9	2.112	0.668541	291832	319922	433020	162257	787839	675768
P61082	NEDD8-conjugating enzyme Ubc12	Ube2m	18	4	2.109	0.38759	232498	411317	351530	227287	741500	753398
P99029	Peroxiredoxin-5, mitochondrial	Prdx5	88	8	2.099	0.351163	550629	3.73642e+06	4.6578e+06	2.00436e+06	8.67074e+06	7.84281e+06
O08599	Syntaxin-binding protein 1	Stxbp1	350	23	2.097	0.14356	1.51136e+07	2.36738e+07	3.69723e+07	2.90779e+07	5.59126e+07	4.96512e+07
P02301	Histone H3.3C	H3-5	97	5	2.089	0.215369	8.99317e+06	2.82434e+07	4.53169e+07	4.14344e+07	5.90009e+07	5.96306e+07
Q7TNR6	Immunoglobulin superfamily member 21	Igsf21	9	4	2.087	0.0730816	43696.7	15977	32683.4	65229.4	68224.3	90047.1
P62245	40S ribosomal protein S15a	Rps15a	21	3	2.086	0.583521	96549.4	522457	664361	142130	1.10679e+06	1.08996e+06
Q03265	ATP synthase subunit alpha, mitochondrial	Atp5f1a	593	25	2.082	0.294996	1.71512e+07	3.77407e+07	6.02107e+07	3.16721e+07	9.53546e+07	7.85686e+07
Q91WD5	NADH dehydrogenase	Ndufs2	46	7	2.081	0.163037	295718	781493	868265	691853	2.02267e+06	1.62611e+06
P00405	Cytochrome c oxidase subunit 2	Mtco2	66	3	2.078	0.12179	4.19524e+06	4.35901e+06	7.35886e+06	6.01302e+06	1.11855e+07	9.05711e+06
B2RSH2	Guanine nucleotide-binding protein G(i) subunit alpha-1	Gnai1	54	4	2.077	0.0682351	299873	410973	521998	514693	966976	853505
P50580	Proliferation-associated protein 2G4	Pa2g4	8	3	2.077	0.0203308	40995.3	43262.3	63939.2	89837.9	113984	88929
P27546	Microtubule-associated protein 4	Map4	25	5	2.075	0.355272	151313	575729	893030	395579	1.3361e+06	1.19448e+06
P17427	AP-2 complex subunit alpha-2	Ap2a2	112	16	2.074	0.324894	991882	2.00114e+06	2.50759e+06	1.33984e+06	4.78872e+06	4.15118e+06
P14824	Annexin A6	Anxa6	55	12	2.073	0.437322	252740	739323	1.09557e+06	373004	2.17633e+06	1.53278e+06
P35802	Neuronal membrane glycoprotein M6-a	Gpm6a	69	6	2.068	0.23412	1.27732e+06	5.4693e+06	7.08768e+06	5.10771e+06	1.2514e+07	1.13123e+07
Q8BMF4	Dihydrolipoyllysine-residue acetyltransferase component of pyruvate dehydrogenase complex, mitochondrial	Dlat	61	6	2.067	0.103957	1.50287e+06	2.51723e+06	3.20435e+06	2.90416e+06	5.20387e+06	5.24193e+06
P07356	Annexin A2	Anxa2	7	5	2.062	0.544879	130438	148488	621367	292465	306190	400129
P61979	Heterogeneous nuclear ribonucleoprotein K	Hnrnpk	61	10	2.062	0.176729	392986	1.42981e+06	1.94252e+06	2.18882e+06	2.94781e+06	3.2337e+06
P46460	Vesicle-fusing ATPase	Nsf	325	30	2.059	0.180136	2.91352e+06	8.41842e+06	1.09466e+07	8.87716e+06	1.9347e+07	1.7337e+07
P99024	Tubulin beta-5 chain	Tubb5	1246	3	2.059	0.0583386	1.07225e+07	1.39053e+07	1.79517e+07	1.7937e+07	2.86363e+07	2.96579e+07
Q9Z1N5	Spliceosome RNA helicase Ddx39b	Ddx39b	57	10	2.059	0.0575707	2.23953e+06	2.6634e+06	3.32856e+06	3.79879e+06	7.82556e+06	5.48294e+06
P58281	Dynamin-like 120 kDa protein, mitochondrial	Opa1	16	6	2.053	0.490443	109755	134270	213975	82822.8	607436	275720
O89053	Coronin-1A	Coro1a	44	6	2.047	0.0708863	546662	775762	977493	966182	1.58808e+06	1.89106e+06
P55012	Solute carrier family 12 member 2	Slc12a2	18	5	2.046	0.465053	67997.6	334601	501163	151943	768739	684447
Q7TQD2	Tubulin polymerization-promoting protein	Tppp	13	2	2.045	0.255096	531644	257262	122073	394355	526125	588721
Q8K2B3	Succinate dehydrogenase	Sdha	146	18	2.044	0.173696	1.89531e+06	4.8666e+06	6.18927e+06	4.86606e+06	1.12792e+07	9.94585e+06
Q60900	ELAV-like protein 3	Elavl3	25	3	2.043	0.418065	38030.5	141938	187198	71525.8	312484	290016
P61750	ADP-ribosylation factor 4	Arf4	52	2	2.042	0.159447	257642	372374	526830	398706	859084	760240
Q62425	Cytochrome c oxidase subunit NDUFA4	Ndufa4	21	3	2.038	0.293769	172955	1.15145e+06	1.67917e+06	943658	2.34674e+06	3.06552e+06
P26369	Splicing factor U2AF 65 kDa subunit	U2af2	4	2	2.037	0.662044	44573	95232.9	86902.9	24140.3	278533	177031
P63001	Ras-related C3 botulinum toxin substrate 1	Rac1	134	8	2.033	0.23532	4.11001e+06	1.15524e+07	1.41282e+07	9.31927e+06	2.49167e+07	2.3488e+07
P61161	Actin-related protein 2	Actr2	4	2	2.033	0.565758	22513.5	80257.7	157659	35049.8	228084	163164
Q99K48	Non-POU domain-containing octamer-binding protein	Nono	16	4	2.032	0.454885	136122	392389	482852	178601	797227	938667
P40142	Transketolase	Tkt	44	6	2.03	0.126037	1.32965e+06	1.44923e+06	1.64794e+06	1.63134e+06	3.35769e+06	2.94195e+06
P62874	Guanine nucleotide-binding protein G(I)/G(S)/G(T) subunit beta-1	Gnb1	191	5	2.029	0.260795	7.2349e+06	8.62586e+06	1.15443e+07	7.90765e+06	1.75007e+07	1.96462e+07
Q9R0P9	Ubiquitin carboxyl-terminal hydrolase isozyme L1	Uchl1	18	3	2.027	0.264001	110543	844388	947554	721279	1.74808e+06	1.71151e+06
P63318	Protein kinase C gamma type	Prkcg	183	22	2.023	0.147835	1.6825e+06	4.98719e+06	7.4641e+06	9.83438e+06	1.2887e+07	1.00892e+07
P19096	Fatty acid synthase	Fasn	42	15	2.02	0.0830991	375961	621620	876021	1.22957e+06	1.38393e+06	1.25568e+06
Q9CQJ8	NADH dehydrogenase	Ndufb9	3	2	2.02	0.845065	31161	81090.7	186673	18605.8	288380	163786
Q9WV60	Glycogen synthase kinase-3 beta	Gsk3b	13	2	2.014	0.30822	98296	223011	306807	165942	496142	449224
P70372	ELAV-like protein 1	Elavl1	27	5	2.014	0.297017	189177	668879	865358	491353	1.34699e+06	1.36845e+06
Q9WUM3	Coronin-1B	Coro1b	28	4	2.012	0.374887	130134	530604	765293	335074	1.11773e+06	1.06784e+06
Q5SQX6	Cytoplasmic FMR1-interacting protein 2	Cyfip2	45	2	2.006	0.43283	47918.4	190085	285125	102178	426760	381350
Q91V92	ATP-citrate synthase	Acly	17	9	2.002	0.191204	217610	616374	741544	593094	1.23367e+06	1.24484e+06
P56399	Ubiquitin carboxyl-terminal hydrolase 5	Usp5	60	10	2.001	0.0669253	319119	548160	640137	687438	1.09706e+06	1.14807e+06
P62259	14-3-3 protein epsilon	Ywhae	116	9	2.001	0.175054	970422	1.46608e+06	2.25382e+06	1.64151e+06	3.39726e+06	2.93356e+06
Q99M71	Mammalian ependymin-related protein 1	Epdr1	10	2	1.999	0.713431	122030	235716	246038	67616.3	471112	531751
Q8R164	Valacyclovir hydrolase	Bphl	5	3	1.997	0.336724	58900.1	289186	411153	192507	694538	577613
Q9DCN2	NADH-cytochrome b5 reductase 3	Cyb5r3	10	3	1.991	0.984887	23645.9	57397.2	156520	8795.5	226498	114303
Q8BK64	Activator of 90 kDa heat shock protein ATPase homolog 1	Ahsa1	14	3	1.986	0.639874	37576.2	173532	260270	47621.8	410854	344565
Q6PHZ2	Calcium/calmodulin-dependent protein kinase type II subunit delta	Camk2d	121	5	1.984	0.270677	379903	577215	758165	482665	1.14545e+06	1.27106e+06
P68254	14-3-3 protein theta	Ywhaq	95	6	1.984	0.23468	741967	2.41289e+06	3.27344e+06	2.29387e+06	5.28393e+06	4.78635e+06
Q8VDP6	CDP-diacylglycerol--inositol 3-phosphatidyltransferase	Cdipt	8	2	1.982	0.259652	68628	358868	433857	310978	740232	711349
P52480	Pyruvate kinase PKM	Pkm	483	26	1.982	0.679352	2.75867e+07	2.68639e+07	5.92508e+07	2.22363e+07	6.31599e+07	5.46717e+07
Q99LD8	N(G),N(G)-dimethylarginine dimethylaminohydrolase 2	Ddah2	27	5	1.976	0.488396	98026.3	1.44895e+06	2.05686e+06	428952	3.59518e+06	2.86368e+06
P56480	ATP synthase subunit beta, mitochondrial	Atp5f1b	118	13	1.976	0.363286	964342	3.78209e+06	4.74224e+06	2.20558e+06	7.72108e+06	7.47248e+06
P20152	Vimentin	Vim	80	11	1.975	0.368195	291499	2.16573e+06	2.09605e+06	895476	4.86291e+06	4.13955e+06
Q811D0	Disks large homolog 1	Dlg1	17	2	1.969	0.494931	10432.8	103735	145835	36444.6	211941	204206
O55023	Inositol monophosphatase 1	Impa1	46	8	1.968	0.114636	568532	865872	1.19143e+06	1.04677e+06	1.7302e+06	1.70433e+06
Q9QYR9	Acyl-coenzyme A thioesterase 2, mitochondrial	Acot2	22	5	1.968	0.529331	86118.6	463622	713061	174168	1.07747e+06	912424
P51150	Ras-related protein Rab-7a	Rab7a	44	8	1.964	0.435821	247683	1.23608e+06	1.48209e+06	522034	2.69723e+06	2.4277e+06
Q08331	Calretinin	Calb2	50	6	1.963	0.453954	127267	1.08455e+06	1.41074e+06	381473	2.12871e+06	2.79879e+06
Q8CI94	Glycogen phosphorylase, brain form	Pygb	98	9	1.962	0.191193	594628	3.04373e+06	4.47214e+06	5.08791e+06	9.07814e+06	5.97198e+06
P50396	Rab GDP dissociation inhibitor alpha	Gdi1	181	13	1.96	0.0754204	3.45883e+06	8.23493e+06	9.68468e+06	2.21613e+07	1.54778e+07	1.6144e+07
Q9JHU4	Cytoplasmic dynein 1 heavy chain 1	Dync1h1	218	49	1.957	0.319766	2.18475e+06	5.78072e+06	9.21387e+06	4.90964e+06	1.25789e+07	1.1311e+07
Q9Z1G3	V-type proton ATPase subunit C 1	Atp6v1c1	31	5	1.953	0.293097	243884	1.26375e+06	1.47458e+06	790860	2.46857e+06	3.28788e+06
Q99PU5	Long-chain-fatty-acid--CoA ligase ACSBG1	Acsbg1	104	12	1.95	0.344367	657302	3.63746e+06	4.08863e+06	2.01813e+06	7.29388e+06	7.09178e+06
P80316	T-complex protein 1 subunit epsilon	Cct5	5	3	1.946	0.0423515	83846.4	85406.6	126659	140317	180501	166182
Q8K596	Sodium/calcium exchanger 2	Slc8a2	31	8	1.946	0.261124	83391.7	374861	640322	460954	987690	729324
Q9Z2I9	Succinate--CoA ligase	Sucla2	65	8	1.946	0.300855	532215	2.08937e+06	2.93089e+06	1.57287e+06	5.07064e+06	4.06498e+06
P11499	Heat shock protein HSP 90-beta	Hsp90ab1	297	14	1.942	0.192363	1.52113e+06	4.48389e+06	5.03662e+06	3.74388e+06	1.18113e+07	8.70554e+06
P28474	Alcohol dehydrogenase class-3	Adh5	33	6	1.94	0.383643	203225	717286	918593	400444	1.56819e+06	1.39175e+06
P24527	Leukotriene A-4 hydrolase	Lta4h	10	3	1.939	0.346166	40092.9	162479	228911	103793	404986	315119
Q8BUV3	Gephyrin	Gphn	19	4	1.936	0.249788	369872	705201	924799	601110	1.36557e+06	1.42117e+06
P06151	L-lactate dehydrogenase A chain	Ldha	150	11	1.928	0.333991	4.81018e+06	7.68536e+06	1.01303e+07	5.88169e+06	1.55452e+07	1.48188e+07
P62743	AP-2 complex subunit sigma	Ap2s1	22	3	1.923	0.286942	81053.6	1.00407e+06	1.32305e+06	968422	2.59867e+06	1.93112e+06
Q9D6R2	Isocitrate dehydrogenase	Idh3a	82	8	1.922	0.378963	503675	2.73903e+06	3.00528e+06	1.2695e+06	6.03403e+06	5.26454e+06
P24369	Peptidyl-prolyl cis-trans isomerase B	Ppib	19	5	1.92	0.187463	80652.8	437359	514897	839869	1.00563e+06	684366
Q64518	Sarcoplasmic/endoplasmic reticulum calcium ATPase 3	Atp2a3	78	5	1.915	0.424195	105504	311348	432586	159737	912760	596301
Q9D0K2	Succinyl-CoA:3-ketoacid coenzyme A transferase 1, mitochondrial	Oxct1	35	9	1.906	0.230979	65468.1	492198	524239	941437	938191	602534
P60867	40S ribosomal protein S20	Rps20	25	3	1.905	0.358638	90702	724643	927806	431425	1.54874e+06	1.3804e+06
P11983	T-complex protein 1 subunit alpha	Tcp1	26	5	1.903	0.450848	138637	317138	624187	231788	845845	603467
P70404	Isocitrate dehydrogenase	Idh3g	35	6	1.899	0.235055	476227	830133	1.11355e+06	727826	2.5031e+06	1.57681e+06
Q8QZT1	Acetyl-CoA acetyltransferase, mitochondrial	Acat1	118	13	1.89	0.242677	828152	3.47757e+06	3.94582e+06	2.82843e+06	7.41171e+06	6.57291e+06
Q920I9	WD repeat-containing protein 7	Wdr7	13	8	1.889	0.636323	189978	404407	453955	141173	764087	911471
Q99LX0	Parkinson disease protein 7 homolog	Park7	18	4	1.887	0.343532	149257	766340	981028	511934	1.44591e+06	1.48256e+06
Q9CQI6	Coactosin-like protein	Cotl1	41	6	1.885	0.362891	3.3789e+06	1.33972e+06	1.75089e+06	1.97933e+06	3.38262e+06	3.30089e+06
Q9Z0E0	Neurochondrin	Ncdn	45	7	1.882	0.138671	466686	1.4398e+06	1.68336e+06	2.03042e+06	2.71036e+06	3.28146e+06
Q9WUA3	ATP-dependent 6-phosphofructokinase, platelet type	Pfkp	37	5	1.882	0.443385	56163.8	251365	356401	125343	561407	472971
Q9QUI0	Transforming protein RhoA	Rhoa	80	6	1.881	0.438339	1.1602e+06	2.03085e+06	2.15329e+06	1.05214e+06	5.53535e+06	3.82015e+06
P28352	DNA-(apurinic or apyrimidinic site) endonuclease	Apex1	6	3	1.878	0.0948756	60940.6	88910.4	134817	130704	218999	166934
Q9DB77	Cytochrome b-c1 complex subunit 2, mitochondrial	Uqcrc2	113	13	1.873	0.196908	967618	3.51434e+06	4.9176e+06	6.58303e+06	7.60493e+06	5.49058e+06
Q6Q477	Plasma membrane calcium-transporting ATPase 4	Atp2b4	157	3	1.873	0.436873	111088	644990	875122	297510	1.20789e+06	1.46153e+06
Q8BH44	Coronin-2B	Coro2b	9	3	1.872	0.649919	60330	169350	177058	44464	423724	317081
Q61171	Peroxiredoxin-2	Prdx2	153	9	1.869	0.303657	4.19832e+06	1.16584e+07	1.47573e+07	8.28183e+06	2.17858e+07	2.53721e+07
Q9CZ13	Cytochrome b-c1 complex subunit 1, mitochondrial	Uqcrc1	228	14	1.868	0.221792	2.48506e+06	9.9459e+06	1.39419e+07	1.46312e+07	1.98554e+07	1.8574e+07
P35282	Ras-related protein Rab-21	Rab21	12	2	1.865	0.107972	82670.7	116505	149523	132096	244725	217290
P05202	Aspartate aminotransferase, mitochondrial	Got2	315	17	1.857	0.237594	3.62361e+06	1.50084e+07	1.79383e+07	1.44065e+07	2.95425e+07	2.78675e+07
P48193	Protein 4.1	Epb41	6	2	1.847	0.332942	46758	46615.8	85727.9	53524	101829	86340.3
Q8VE33	Ganglioside-induced differentiation-associated protein 1-like 1	Gdap1l1	18	3	1.845	0.896793	85362.3	117094	370379	56578.4	411374	215993
Q501J6	Probable ATP-dependent RNA helicase DDX17	Ddx17	57	2	1.839	0.776345	27849	92831.3	133580	23868.4	170758	179205
P80317	T-complex protein 1 subunit zeta	Cct6a	26	6	1.832	0.506042	176305	789004	1.06548e+06	316851	1.77608e+06	1.44547e+06
Q6PDY2	2-aminoethanethiol dioxygenase	Ado	18	5	1.832	0.134635	50414.6	117740	122117	113598	215663	248948
P62897	Cytochrome c, somatic	Cycs	17	2	1.832	0.751038	255137	1.92965e+06	1.38823e+06	266223	2.78105e+06	2.54275e+06
Q8R4F1	Netrin-G2	Ntng2	4	3	1.825	0.298217	9497.8	61889.9	24610	44906.7	35940.9	88273.5
Q80TJ1	Calcium-dependent secretion activator 1	Cadps	55	8	1.822	0.620706	229811	1.29689e+06	1.72982e+06	326817	3.05985e+06	2.36314e+06
Q8VCW8	Medium-chain acyl-CoA ligase ACSF2, mitochondrial	Acsf2	7	2	1.821	0.152443	33228.7	80392.8	101255	102492	161388	146424
P05201	Aspartate aminotransferase, cytoplasmic	Got1	239	17	1.82	0.217403	2.59908e+06	7.46479e+06	9.15435e+06	7.0664e+06	1.48015e+07	1.35866e+07
Q62167	ATP-dependent RNA helicase DDX3X	Ddx3x	12	2	1.818	0.584253	23897.7	113434	216681	51827.6	237378	206194
P24549	Aldehyde dehydrogenase 1A1	Aldh1a1	42	5	1.817	0.186736	508054	932985	1.26077e+06	933784	2.17946e+06	1.69491e+06
Q925N0	Sideroflexin-5	Sfxn5	29	4	1.815	0.438399	104711	1.07314e+06	1.66495e+06	510920	2.61444e+06	1.94815e+06
P61982	14-3-3 protein gamma	Ywhag	135	3	1.812	0.341372	2.34299e+06	3.23607e+06	4.43576e+06	2.64008e+06	7.01041e+06	5.8646e+06
P28661	Septin-4	Septin4	47	5	1.809	0.406923	49073.8	1.16356e+06	1.60851e+06	602999	2.49577e+06	2.10486e+06
Q01853	Transitional endoplasmic reticulum ATPase	Vcp	113	19	1.808	0.271756	626129	2.26894e+06	2.97571e+06	1.90065e+06	5.03555e+06	4.10135e+06
P39053	Dynamin-1	Dnm1	386	28	1.807	0.233944	6.14899e+06	1.70032e+07	2.19273e+07	1.49882e+07	3.91543e+07	3.07293e+07
D3Z7P3	Glutaminase kidney isoform, mitochondrial	Gls	80	7	1.806	0.246274	766625	1.5201e+06	1.82892e+06	1.26096e+06	2.74508e+06	2.8166e+06
Q7TMK9	Heterogeneous nuclear ribonucleoprotein Q	Syncrip	18	2	1.804	0.810839	78572.4	262454	380191	55379.4	598842	473466
P28652	Calcium/calmodulin-dependent protein kinase type II subunit beta	Camk2b	177	7	1.802	0.319228	694136	5.26388e+06	6.0108e+06	3.53601e+06	1.08132e+07	9.48376e+06
O35643	AP-1 complex subunit beta-1	Ap1b1	81	6	1.802	0.178257	660817	1.03228e+06	1.39584e+06	1.08274e+06	1.93654e+06	1.85981e+06
Q8BW86	Rho guanine nucleotide exchange factor 33	Arhgef33	23	6	1.798	0.67226	88907.6	330043	469546	99166.4	707683	593487
P10649	Glutathione S-transferase Mu 1	Gstm1	106	7	1.795	0.268083	1.2219e+06	4.10625e+06	5.73066e+06	4.37597e+06	7.43773e+06	7.36943e+06
P80313	T-complex protein 1 subunit eta	Cct7	25	7	1.789	0.416905	205525	1.0745e+06	1.45392e+06	626948	1.93453e+06	1.92199e+06
Q3UH60	Disco-interacting protein 2 homolog B	Dip2b	12	3	1.788	0.0542197	92981.5	88392.7	110457	115763	168784	166232
P14733	Lamin-B1	Lmnb1	74	11	1.786	0.174554	896967	1.68769e+06	2.65189e+06	2.0238e+06	5.29832e+06	3.01388e+06
Q11011	Puromycin-sensitive aminopeptidase	Npepps	72	14	1.785	0.511197	250482	1.03811e+06	1.51735e+06	457664	2.3498e+06	1.85252e+06
Q8BG05	Heterogeneous nuclear ribonucleoprotein A3	Hnrnpa3	61	5	1.784	0.375038	230633	1.38829e+06	2.14841e+06	905425	3.54583e+06	2.47666e+06
Q60864	Stress-induced-phosphoprotein 1	Stip1	24	4	1.783	0.957445	311272	439118	512547	88357.1	883374	782919
Q8CBY8	Dynactin subunit 4	Dctn4	4	2	1.778	0.645232	41653.4	65424.1	80449.4	32838.7	117635	116354
Q8BHN3	Neutral alpha-glucosidase AB	Ganab	15	7	1.777	0.631206	77120.8	167640	224098	67414.4	394456	297944
P08752	Guanine nucleotide-binding protein G(i) subunit alpha-2	Gnai2	48	4	1.776	0.350968	351987	1.09864e+06	1.42538e+06	693008	2.64241e+06	1.95169e+06
Q8CHC4	Synaptojanin-1	Synj1	63	12	1.773	0.334492	306106	1.23015e+06	1.72867e+06	976703	2.40048e+06	2.18108e+06
Q02257	Junction plakoglobin	Jup	25	8	1.772	0.80904	208629	500279	1.21325e+06	207410	1.22774e+06	886562
P62806	Histone H4	H4c1	76	4	1.771	0.50411	178633	6.07174e+06	1.09502e+07	2.37891e+06	1.07519e+07	1.13989e+07
Q6PIC6	Sodium/potassium-transporting ATPase subunit alpha-3	Atp1a3	1511	30	1.77	0.0761415	1.10118e+08	1.35271e+08	1.66835e+08	1.61995e+08	2.76497e+08	2.39401e+08
Q60931	Voltage-dependent anion-selective channel protein 3	Vdac3	158	7	1.769	0.261648	2.30327e+07	8.73065e+06	1.17394e+07	1.7678e+07	2.4055e+07	2.07632e+07
Q9QYG0	Protein NDRG2	Ndrg2	61	7	1.765	0.356202	479423	2.49476e+06	2.89186e+06	1.39146e+06	5.4018e+06	4.4043e+06
P28738	Kinesin heavy chain isoform 5C	Kif5c	21	6	1.761	0.0154055	200843	214183	279625	351509	461389	377171
Q8BFR5	Elongation factor Tu, mitochondrial	Tufm	56	9	1.759	0.179277	1.10907e+06	1.94579e+06	2.43595e+06	1.9528e+06	3.4219e+06	3.45551e+06
Q9JIG8	PRA1 family protein 2	Praf2	19	2	1.754	0.194723	131854	194809	214841	217032	1.06759e+06	341645
Q8R081	Heterogeneous nuclear ribonucleoprotein L	Hnrnpl	49	8	1.751	0.219689	724310	1.64403e+06	2.13843e+06	1.52691e+06	3.61143e+06	2.87824e+06
O70133	ATP-dependent RNA helicase A	Dhx9	53	9	1.745	0.192466	234016	525200	669326	505081	1.27779e+06	916230
Q80XN0	D-beta-hydroxybutyrate dehydrogenase, mitochondrial	Bdh1	81	11	1.744	0.577043	413981	2.10213e+06	2.28097e+06	520984	5.57267e+06	3.66544e+06
O35381	Acidic leucine-rich nuclear phosphoprotein 32 family member A	Anp32a	6	2	1.744	0.0955304	238666	386140	556206	660926	879704	673266
P07901	Heat shock protein HSP 90-alpha	Hsp90aa1	288	18	1.742	0.248634	5.40938e+06	1.22168e+07	1.68881e+07	1.11445e+07	2.74887e+07	2.12758e+07
O55143	Sarcoplasmic/endoplasmic reticulum calcium ATPase 2	Atp2a2	274	21	1.736	0.140439	3.89346e+06	8.64589e+06	1.04236e+07	1.02587e+07	1.73876e+07	1.50066e+07
Q9ERK4	Exportin-2	Cse1l	13	3	1.735	0.47179	17795.6	148753	240131	60618.3	444740	258053
Q8BH59	Electrogenic aspartate/glutamate antiporter SLC25A12, mitochondrial	Slc25a12	118	17	1.733	0.51348	533625	6.69724e+06	6.62491e+06	1.64689e+06	1.268e+07	1.1481e+07
Q99104	Unconventional myosin-Va	Myo5a	36	12	1.732	0.391638	398441	865147	1.18075e+06	586067	1.8333e+06	1.4983e+06
Q7TNC9	Inositol polyphosphate-5-phosphatase A	Inpp5a	10	2	1.731	0.530456	40214.3	301697	397941	94466	700855	522384
P62264	40S ribosomal protein S14	Rps14	15	2	1.731	0.2701	148371	253200	357480	234035	492359	438219
Q62277	Synaptophysin	Syp	43	3	1.722	0.26977	2.35954e+06	4.01844e+06	5.33738e+06	3.49051e+06	8.12787e+06	6.9191e+06
P34884	Macrophage migration inhibitory factor	Mif	45	3	1.721	0.839325	1.29092e+07	2.50197e+06	2.53347e+06	2.41598e+06	4.36054e+06	5.22564e+06
P35486	Pyruvate dehydrogenase E1 component subunit alpha, somatic form, mitochondrial	Pdha1	249	17	1.721	0.392864	1.24813e+06	1.13462e+07	1.80196e+07	8.85802e+06	2.18344e+07	1.95253e+07
Q9DBG3	AP-2 complex subunit beta	Ap2b1	112	8	1.721	0.377618	2.0819e+06	5.34146e+06	7.32216e+06	3.64325e+06	1.11614e+07	9.19097e+06
P63017	Heat shock cognate 71 kDa protein	Hspa8	575	25	1.714	0.401474	4.93547e+07	3.21958e+07	3.72789e+07	3.15201e+07	6.42374e+07	6.38791e+07
P20108	Thioredoxin-dependent peroxide reductase, mitochondrial	Prdx3	41	5	1.712	0.328907	329234	2.11741e+06	3.15679e+06	2.0277e+06	4.34579e+06	3.62526e+06
P20357	Microtubule-associated protein 2	Map2	16	3	1.702	0.450422	98802.9	164349	226462	117329	294684	279803
O55131	Septin-7	Septin7	34	8	1.702	0.462741	235447	957487	1.48835e+06	473649	2.79971e+06	1.63002e+06
Q9D0E1	Heterogeneous nuclear ribonucleoprotein M	Hnrnpm	20	5	1.701	0.499563	157543	378205	454708	193457	715463	643195
Q8VIJ6	Splicing factor, proline- and glutamine-rich	Sfpq	41	7	1.686	0.0689871	690137	908304	1.21258e+06	1.29215e+06	1.76095e+06	1.53144e+06
P58252	Elongation factor 2	Eef2	100	15	1.685	0.360488	1.18326e+06	3.03135e+06	3.91316e+06	2.11049e+06	5.84192e+06	5.10867e+06
P15532	Nucleoside diphosphate kinase A	Nme1	22	3	1.68	0.638215	144287	1.16348e+06	1.53219e+06	290036	1.95511e+06	2.04003e+06
Q8BMS1	Trifunctional enzyme subunit alpha, mitochondrial	Hadha	48	9	1.679	0.360658	490351	1.00369e+06	1.13968e+06	660870	1.88263e+06	1.68499e+06
P06802	Ectonucleotide pyrophosphatase/phosphodiesterase family member 1	Enpp1	14	5	1.678	0.658859	1.16022e+06	1.33281e+07	3.28033e+07	4.02057e+06	3.1296e+07	2.23604e+07
P09671	Superoxide dismutase	Sod2	11	2	1.677	0.842528	37095.4	286418	357422	29964.2	480388	566140
Q61879	Myosin-10	Myh10	35	9	1.676	0.195432	262865	464744	636540	476029	1.08738e+06	779054
P17710	Hexokinase-1	Hk1	344	34	1.675	0.347198	4.62386e+06	1.72869e+07	2.17727e+07	1.25372e+07	3.0434e+07	2.89505e+07
Q9QYB5	Gamma-adducin	Add3	12	3	1.669	0.522169	201727	738991	620345	273830	1.21049e+06	1.03557e+06
Q9DBJ1	Phosphoglycerate mutase 1	Pgam1	108	10	1.668	0.261016	351619	4.60631e+06	5.08288e+06	6.61397e+06	9.37637e+06	7.68256e+06
P42669	Transcriptional activator protein Pur-alpha	Pura	10	4	1.667	0.485987	385080	1.07503e+06	1.27632e+06	536374	2.02098e+06	1.7917e+06
P61264	Syntaxin-1B	Stx1b	52	7	1.662	0.150784	571060	1.83178e+06	1.57153e+06	2.61246e+06	3.11983e+06	2.28586e+06
Q61316	Heat shock 70 kDa protein 4	Hspa4	88	11	1.661	0.963494	2.43266e+06	2.45394e+06	3.30529e+06	933766	4.77872e+06	4.07619e+06
Q9EQF6	Dihydropyrimidinase-related protein 5	Dpysl5	36	11	1.659	0.202517	437215	558700	734663	654113	2.31046e+06	926642
Q8K0T0	Reticulon-1	Rtn1	37	4	1.658	0.416472	781861	1.64505e+06	2.5001e+06	1.22349e+06	3.35022e+06	2.72712e+06
P42125	Enoyl-CoA delta isomerase 1, mitochondrial	Eci1	8	2	1.657	0.394359	8088.13	125242	167179	87237.8	214930	207566
P68510	14-3-3 protein eta	Ywhah	113	8	1.656	0.240788	4.34978e+06	1.21701e+07	1.62518e+07	1.2141e+07	2.54628e+07	2.01485e+07
P08228	Superoxide dismutase	Sod1	11	2	1.652	0.492866	8497.75	149933	158667	42518.4	247672	263891
Q99JY9	Actin-related protein 3	Actr3	60	10	1.651	0.265189	410680	739143	1.15247e+06	741489	1.78657e+06	1.22038e+06
Q9CZU6	Citrate synthase, mitochondrial	Cs	152	15	1.645	0.105962	5.37949e+06	8.6766e+06	1.02572e+07	9.9856e+06	1.53338e+07	1.4269e+07
Q9D0F9	Phosphoglucomutase-1	Pgm1	41	6	1.644	0.437587	267259	739710	944098	415994	1.57625e+06	1.21627e+06
Q9CZY3	Ubiquitin-conjugating enzyme E2 variant 1	Ube2v1	14	2	1.644	0.485388	78485.1	522956	628040	225156	859769	866092
Q921G7	Electron transfer flavoprotein-ubiquinone oxidoreductase, mitochondrial	Etfdh	13	5	1.639	0.287051	434106	475559	715301	495350	970517	779456
Q9D880	Mitochondrial import inner membrane translocase subunit TIM50	Timm50	11	2	1.636	0.154852	29591.8	65836.5	59802.1	57362.3	125191	97841.5
Q9CZW5	Mitochondrial import receptor subunit TOM70	Tomm70	38	8	1.622	0.188443	746918	1.64804e+06	1.95572e+06	1.58646e+06	3.43268e+06	2.67235e+06
Q76MZ3	Serine/threonine-protein phosphatase 2A 65 kDa regulatory subunit A alpha isoform	Ppp2r1a	87	13	1.62	0.269099	1.02899e+06	1.87341e+06	2.40579e+06	1.57642e+06	4.44443e+06	3.03415e+06
Q9WTX6	Cullin-1	Cul1	5	2	1.614	0.0680939	85386.2	66461.1	86034	92263.5	142502	137829
Q9QUR8	Semaphorin-7A	Sema7a	18	6	1.613	0.297923	26435.6	32001.2	25706.4	24813.1	47199.6	42652.2
O08529	Calpain-2 catalytic subunit	Capn2	11	5	1.611	0.668965	41432.3	161755	226974	54655.6	303292	260585
P50247	Adenosylhomocysteinase	Ahcy	13	4	1.6	0.463387	61122	522376	705913	221703	1.19221e+06	835546
P80314	T-complex protein 1 subunit beta	Cct2	21	6	1.599	0.0544233	79606.5	57278.3	61661.8	97497.1	99481.9	98580.7
Q6PIE5	Sodium/potassium-transporting ATPase subunit alpha-2	Atp1a2	1374	27	1.598	0.235178	1.75733e+07	3.42904e+07	4.49635e+07	3.26233e+07	6.77008e+07	5.47875e+07
Q99LB2	Dehydrogenase/reductase SDR family member 4	Dhrs4	6	2	1.598	0.604576	56244	222508	257700	74889.5	415249	355502
Q99K85	Phosphoserine aminotransferase	Psat1	10	4	1.598	0.457056	58796.2	482856	599635	226926	845325	771421
Q9R1Q8	Transgelin-3	Tagln3	43	7	1.597	0.258628	438842	1.05993e+06	1.34764e+06	977173	1.69269e+06	1.94276e+06
P13707	Glycerol-3-phosphate dehydrogenase	Gpd1	118	14	1.591	0.409201	748077	2.19974e+06	2.88165e+06	1.38569e+06	4.39325e+06	3.50065e+06
Q9DB20	ATP synthase subunit O, mitochondrial	Atp5po	125	6	1.59	0.69845	2.21402e+06	7.83126e+06	8.62893e+06	2.29332e+06	1.29239e+07	1.24506e+07
P46660	Alpha-internexin	Ina	311	18	1.589	0.323309	4.15316e+06	1.48839e+07	1.919e+07	1.19547e+07	2.36575e+07	2.80228e+07
P54822	Adenylosuccinate lyase	Adsl	8	2	1.587	0.136816	119210	139675	175992	152461	248416	221721
Q3TXS7	26S proteasome non-ATPase regulatory subunit 1	Psmd1	8	2	1.576	0.71488	21624.5	147779	166028	29106.7	232942	243099
Q91WG7	Diacylglycerol kinase gamma	Dgkg	2	2	1.573	0.450599	85823.1	65268.2	101523	59705.4	182418	134987
Q9CQQ7	ATP synthase F(0) complex subunit B1, mitochondrial	Atp5pb	38	6	1.571	0.158262	1.2854e+06	1.5577e+06	2.10668e+06	1.74657e+06	2.83877e+06	2.44677e+06
Q62348	Translin	Tsn	4	2	1.56	0.224436	17851.8	22200.6	23036.8	34635.3	123135	25698.9
P48758	Carbonyl reductase	Cbr1	28	4	1.56	0.386934	280583	703478	948629	516688	1.27856e+06	1.09717e+06
Q11136	Xaa-Pro dipeptidase	Pepd	3	2	1.559	0.647951	8087.44	59229.3	65522.9	12013.7	124536	92342.7
Q05BC3	Echinoderm microtubule-associated protein-like 1	Eml1	15	3	1.557	0.229848	99939	188159	219122	166599	328820	293030
P31938	Dual specificity mitogen-activated protein kinase kinase 1	Map2k1	12	2	1.557	0.390006	29824	316276	409674	195824	643967	492288
P08414	Calcium/calmodulin-dependent protein kinase type IV	Camk4	18	3	1.556	0.624349	178663	545016	669145	227550	884791	847958
P08553	Neurofilament medium polypeptide	Nefm	208	14	1.554	0.576524	1.00089e+06	4.88788e+06	6.7179e+06	2.04019e+06	7.59373e+06	8.27169e+06
Q62188	Dihydropyrimidinase-related protein 3	Dpysl3	101	4	1.553	0.346323	116176	406143	438319	242740	846214	630611
Q9QYR6	Microtubule-associated protein 1A	Map1a	55	11	1.55	0.505769	360174	1.50055e+06	1.38825e+06	621913	2.15184e+06	2.20074e+06
Q61792	LIM and SH3 domain protein 1	Lasp1	30	4	1.548	0.162243	257540	646157	587781	586625	909811	1.21623e+06
Q68FD5	Clathrin heavy chain 1	Cltc	591	55	1.547	0.325527	6.88884e+06	2.25281e+07	2.82394e+07	1.63128e+07	4.9226e+07	3.48407e+07
P17183	Gamma-enolase	Eno2	161	4	1.545	0.553712	1.48337e+06	2.73548e+06	3.10466e+06	1.55283e+06	4.24296e+06	4.22644e+06
Q64105	Sepiapterin reductase	Spr	39	5	1.544	0.172083	112018	252859	321628	326356	390385	490995
Q8K310	Matrin-3	Matr3	35	8	1.541	0.251155	466743	935567	1.2673e+06	935940	1.74243e+06	1.44214e+06
Q8BGQ7	Alanine--tRNA ligase, cytoplasmic	Aars1	16	4	1.54	0.506714	136906	288678	360213	164450	551196	444697
Q61699	Heat shock protein 105 kDa	Hsph1	17	3	1.54	0.260433	60370.8	109274	118850	90048.6	168242	439293
P17751	Triosephosphate isomerase	Tpi1	147	13	1.538	0.11576	3.61673e+06	4.98477e+06	5.06803e+06	5.17725e+06	7.66779e+06	1.0514e+07
P10126	Elongation factor 1-alpha 1	Eef1a1	249	5	1.537	0.250455	1.63068e+07	2.71786e+07	3.04613e+07	2.27078e+07	4.75558e+07	4.17812e+07
Q9JLJ2	4-trimethylaminobutyraldehyde dehydrogenase	Aldh9a1	12	4	1.536	0.883281	33807.1	134874	162653	22482.1	245859	207179
Q02053	Ubiquitin-like modifier-activating enzyme 1	Uba1	141	21	1.533	0.408427	1.26971e+06	5.9007e+06	7.54705e+06	3.98484e+06	9.49701e+06	9.04701e+06
P25444	40S ribosomal protein S2	Rps2	24	4	1.533	0.220487	414866	1.00353e+06	1.2563e+06	1.06622e+06	1.84456e+06	1.53833e+06
P52196	Thiosulfate sulfurtransferase	Tst	31	6	1.532	0.672351	123127	534095	524519	120055	1.16346e+06	803303
Q8K021	Secretory carrier-associated membrane protein 1	Scamp1	4	2	1.525	0.744472	43943.8	200985	243129	43673.8	407922	306420
P14873	Microtubule-associated protein 1B	Map1b	38	3	1.524	0.733791	119169	177353	254816	91202.2	373908	270295
Q8R5C5	Beta-centractin	Actr1b	20	3	1.522	0.588258	45447.7	589316	776796	142733	1.19263e+06	897121
Q9CQ92	Mitochondrial fission 1 protein	Fis1	2	2	1.522	0.189294	23270.8	55156.4	68005.8	62245.5	108514	83941.6
E9Q912	Rap1 GTPase-GDP dissociation stimulator 1	Rap1gds1	39	6	1.514	0.348266	192960	497963	597209	385293	768475	754075
P68369	Tubulin alpha-1A chain	Tuba1a	866	5	1.514	0.205264	1.14048e+08	9.64058e+07	1.1989e+08	1.0622e+08	1.8469e+08	1.72662e+08
Q9DCD0	6-phosphogluconate dehydrogenase, decarboxylating	Pgd	19	4	1.511	0.515667	82345.5	496448	633817	213323	881645	750156
P10922	Histone H1.0	H1-0	19	2	1.511	0.324965	984525	3.65346e+06	4.14499e+06	2.95145e+06	5.51856e+06	5.56188e+06
Q9JII6	Aldo-keto reductase family 1 member A1	Akr1a1	4	2	1.51	0.296622	88654.6	123499	68889	133877	318455	87606.6
Q9Z1P6	NADH dehydrogenase	Ndufa7	8	2	1.51	0.507376	24577.4	155038	154238	56295.1	232901	248737
Q3ULJ0	Glycerol-3-phosphate dehydrogenase 1-like protein	Gpd1l	37	6	1.506	0.122801	235149	342315	398352	370431	515668	544323
Q921F2	TAR DNA-binding protein 43	Tardbp	55	7	1.501	0.349483	508449	1.97538e+06	2.1808e+06	1.38462e+06	2.96444e+06	3.14175e+06
P63328	Protein phosphatase 3 catalytic subunit alpha	Ppp3ca	112	11	1.497	0.470718	1.60703e+06	9.43534e+06	1.14772e+07	4.89917e+06	1.47206e+07	1.41257e+07
P97315	Cysteine and glycine-rich protein 1	Csrp1	6	3	1.496	0.948046	56380.7	230586	366950	32981.4	520439	344865
Q9ES97	Reticulon-3	Rtn3	23	2	1.495	0.395175	493998	836749	1.11099e+06	640548	1.63417e+06	1.25128e+06
P28660	Nck-associated protein 1	Nckap1	11	7	1.494	0.522819	270551	228966	314821	185886	552371	404328
Q99KI0	Aconitate hydratase, mitochondrial	Aco2	508	27	1.492	0.11116	5.30392e+07	5.11264e+07	6.11469e+07	6.10688e+07	7.91515e+07	9.82774e+07
P08249	Malate dehydrogenase, mitochondrial	Mdh2	640	17	1.487	0.121271	2.97322e+07	6.0344e+07	6.06453e+07	6.86452e+07	8.97563e+07	9.86082e+07
P14869	60S acidic ribosomal protein P0	Rplp0	14	3	1.487	0.268212	29708.3	70156.6	78204.8	60972.6	104290	106531
P35762	CD81 antigen	Cd81	6	2	1.473	0.87172	23370.4	33373.4	32964.5	7274.36	114038	48548.9
Q8VCM7	Fibrinogen gamma chain	Fgg	50	9	1.469	0.507491	679817	1.43825e+06	4.09899e+06	1.31047e+06	2.11341e+06	6.95192e+06
P17182	Alpha-enolase	Eno1	331	17	1.467	0.363351	2.16178e+07	3.11385e+07	3.58011e+07	2.49364e+07	4.56823e+07	4.67339e+07
Q8BH95	Enoyl-CoA hydratase, mitochondrial	Echs1	27	4	1.466	0.442208	179988	612929	780329	360371	1.17505e+06	898692
O88712	C-terminal-binding protein 1	Ctbp1	26	6	1.459	0.139301	152893	118299	162041	217141	594114	223108
P56564	Excitatory amino acid transporter 1	Slc1a3	277	7	1.459	0.217364	3.94525e+07	1.99046e+07	2.70467e+07	3.58568e+07	4.247e+07	3.94541e+07
Q99LC5	Electron transfer flavoprotein subunit alpha, mitochondrial	Etfa	20	5	1.454	0.382236	58393.9	302206	356503	199677	525327	439288
P08113	Endoplasmin	Hsp90b1	58	6	1.449	0.777952	1.24428e+06	448358	618175	202177	1.08532e+06	895693
P02088	Hemoglobin subunit beta-1	Hbb-b1	153	8	1.444	0.561256	2.28622e+06	8.86054e+06	9.49122e+06	3.18101e+06	1.27922e+07	1.80293e+07
Q9QY76	Vesicle-associated membrane protein-associated protein B	Vapb	11	2	1.441	0.760783	23917.7	207832	205773	30858.3	296536	311638
P51880	Fatty acid-binding protein, brain	Fabp7	15	2	1.432	0.483681	30400	289746	249576	91680.6	557942	357275
P62761	Visinin-like protein 1	Vsnl1	20	4	1.431	0.680675	162576	688521	1.05332e+06	262921	1.22219e+06	985410
Q91VI7	Ribonuclease inhibitor	Rnh1	32	6	1.43	0.58476	172255	1.0388e+06	1.29875e+06	416377	1.5006e+06	1.4858e+06
Q8K0U4	Heat shock 70 kDa protein 12A	Hspa12a	37	8	1.428	0.851951	833109	726156	836802	361064	1.57042e+06	1.18982e+06
O88643	Serine/threonine-protein kinase PAK 1	Pak1	12	2	1.427	0.283496	105362	241581	287005	219345	380054	344689
P19246	Neurofilament heavy polypeptide	Nefh	139	12	1.424	0.450822	523311	1.94771e+06	2.13599e+06	1.05926e+06	3.11114e+06	2.77405e+06
P70168	Importin subunit beta-1	Kpnb1	14	2	1.42	0.0151129	234131	213186	272728	332446	395044	330905
Q9D2G2	Dihydrolipoyllysine-residue succinyltransferase component of 2-oxoglutarate dehydrogenase complex, mitochondrial	Dlst	52	7	1.404	0.438085	437892	2.34315e+06	2.61278e+06	1.29549e+06	3.68511e+06	3.29011e+06
Q60597	2-oxoglutarate dehydrogenase complex component E1	Ogdh	140	17	1.404	0.893801	6.16981e+06	2.98961e+06	4.20191e+06	2.16947e+06	7.2943e+06	5.89822e+06
P62137	Serine/threonine-protein phosphatase PP1-alpha catalytic subunit	Ppp1ca	44	3	1.398	0.795671	157240	1.10108e+06	1.33816e+06	173765	2.04993e+06	1.53961e+06
O35954	Membrane-associated phosphatidylinositol transfer protein 1	Pitpnm1	5	2	1.397	0.356634	39228.2	113619	134648	85258.8	190891	158750
Q9DC69	NADH dehydrogenase	Ndufa9	19	4	1.395	0.346463	120171	550017	662087	459641	909816	767536
P05063	Fructose-bisphosphate aldolase C	Aldoc	458	21	1.389	0.297223	8.43655e+06	2.30546e+07	2.67138e+07	1.912e+07	4.10742e+07	3.20275e+07
P80315	T-complex protein 1 subunit delta	Cct4	59	9	1.385	0.579677	477765	1.27838e+06	1.60848e+06	652917	2.20568e+06	1.77037e+06
P51863	V-type proton ATPase subunit d 1	Atp6v0d1	47	6	1.377	0.15358	1.2631e+06	1.50313e+06	2.00547e+06	1.78051e+06	2.68331e+06	2.06926e+06
Q99L13	3-hydroxyisobutyrate dehydrogenase, mitochondrial	Hibadh	5	2	1.377	0.0576612	165937	181690	202614	209179	283571	250098
Q9QZ88	Vacuolar protein sorting-associated protein 29	Vps29	11	2	1.374	0.679253	8468.6	496946	657614	44054	918507	682652
Q9WTL7	Acyl-protein thioesterase 2	Lypla2	5	2	1.37	0.18367	105388	208761	237067	210174	285963	406056
P48318	Glutamate decarboxylase 1	Gad1	7	2	1.368	0.400777	26098.8	145238	189335	109203	244867	198750
P0C192	Leucine-rich repeat-containing protein 4B	Lrrc4b	15	5	1.368	0.360736	44996.8	36928	22796.2	50504.1	30065	360274
Q9Z0S1	3'(2'),5'-bisphosphate nucleotidase 1	Bpnt1	16	4	1.361	0.481603	41689.6	293457	299693	126631	448709	399470
Q9Z2Q6	Septin-5	Septin5	13	4	1.36	0.310096	122350	518259	610020	460506	943641	704909
Q9CRY7	Lysophospholipase D GDPD1	Gdpd1	15	2	1.359	0.844227	32912.7	188855	231629	35221	283924	256725
P80318	T-complex protein 1 subunit gamma	Cct3	50	10	1.356	0.535058	120995	563951	632393	231347	1.01522e+06	764969
Q04447	Creatine kinase B-type	Ckb	481	16	1.356	0.213473	1.21512e+07	3.06179e+07	3.072e+07	2.90945e+07	4.86096e+07	4.15273e+07
P14152	Malate dehydrogenase, cytoplasmic	Mdh1	215	9	1.354	0.175203	1.1563e+07	9.64698e+06	1.10741e+07	1.12758e+07	2.03899e+07	1.49952e+07
Q61548	Clathrin coat assembly protein AP180	Snap91	38	6	1.353	0.586718	150271	917042	1.18722e+06	357181	1.52419e+06	1.24049e+06
Q8JZN5	Complex I assembly factor ACAD9, mitochondrial	Acad9	2	2	1.352	0.589046	5878.88	103612	143559	24753.1	219655	140041
Q69ZQ1	Myogenesis-regulating glycosidase	Myorg	2	2	1.342	0.546839	15856.6	111429	113449	36452.2	191423	149545
P16125	L-lactate dehydrogenase B chain	Ldhb	230	13	1.342	0.683185	1.10631e+08	5.22672e+07	6.03225e+07	7.20526e+07	8.09229e+07	8.30706e+07
P68033	Actin, alpha cardiac muscle 1	Actc1	579	2	1.337	0.70701	27367.8	28257.3	77701.5	20166.5	37782.9	206853
Q91VD9	NADH-ubiquinone oxidoreductase 75 kDa subunit, mitochondrial	Ndufs1	122	23	1.331	0.550803	1.51701e+06	5.92075e+06	7.39168e+06	2.81883e+06	1.03519e+07	7.88318e+06
Q9CQ60	6-phosphogluconolactonase	Pgls	5	2	1.322	0.689496	48754.6	47750.4	57339.1	36848.9	64476.9	76720.3
Q9CPY7	Cytosol aminopeptidase	Lap3	15	3	1.318	0.951787	144504	257011	288173	86781.7	338869	404377
Q9DCW4	Electron transfer flavoprotein subunit beta	Etfb	35	6	1.315	0.706856	1.37013e+06	1.2534e+06	1.3391e+06	937963	1.85269e+06	1.76108e+06
P62880	Guanine nucleotide-binding protein G(I)/G(S)/G(T) subunit beta-2	Gnb2	149	3	1.311	0.80566	9.9633e+06	2.71532e+06	3.58695e+06	1.06451e+06	4.70376e+06	1.04099e+07
P63158	High mobility group protein B1	Hmgb1	12	3	1.31	0.601431	56793.1	192747	377164	90456.8	725927	252426
O08749	Dihydrolipoyl dehydrogenase, mitochondrial	Dld	70	7	1.304	0.306268	519073	1.88944e+06	2.2663e+06	2.51698e+06	2.46342e+06	2.38644e+06
Q9D394	Protein RUFY3	Rufy3	3	3	1.304	0.0668149	74890.6	56209.1	64678.2	75949.9	97419.3	84322.4
P60843	Eukaryotic initiation factor 4A-I	Eif4a1	45	2	1.303	0.935793	35183.6	72351.2	52471.8	12853.1	189141	68344.9
P68404	Protein kinase C beta type	Prkcb	20	3	1.301	0.856947	668001	335767	376714	135600	891475	490069
Q62261	Spectrin beta chain, non-erythrocytic 1	Sptbn1	217	42	1.296	0.332254	3.37633e+06	7.06442e+06	9.21208e+06	6.40057e+06	1.25918e+07	9.15411e+06
Q9CQV8	14-3-3 protein beta/alpha	Ywhab	81	2	1.291	0.456785	328001	319162	578918	389194	725586	423378
O88569	Heterogeneous nuclear ribonucleoproteins A2/B1	Hnrnpa2b1	51	8	1.282	0.173483	1.05341e+06	1.88018e+06	2.10412e+06	2.4108e+06	4.21155e+06	1.95189e+06
Q62420	Endophilin-A1	Sh3gl2	38	5	1.273	0.346414	430665	973366	1.04254e+06	748551	1.4553e+06	1.23933e+06
P15864	Histone H1.2	H1-2	85	3	1.273	0.573058	3.67772e+06	8.36575e+06	9.96606e+06	5.30396e+06	1.06506e+07	1.11649e+07
Q9EQ20	Methylmalonate-semialdehyde dehydrogenase	Aldh6a1	17	5	1.272	0.346265	326512	648801	813765	527801	1.38065e+06	825512
P26645	Myristoylated alanine-rich C-kinase substrate	Marcks	10	2	1.269	0.115011	87122.4	107367	132921	133568	170571	136299
Q9D0M3	Cytochrome c1, heme protein, mitochondrial	Cyc1	32	5	1.267	0.869357	2.86024e+06	1.66486e+06	1.79323e+06	933524	3.2319e+06	2.27249e+06
Q7TMB8	Cytoplasmic FMR1-interacting protein 1	Cyfip1	29	2	1.266	0.52686	134551	788382	1.08795e+06	370870	1.61272e+06	998155
P28663	Beta-soluble NSF attachment protein	Napb	23	6	1.249	0.59943	158054	626670	854041	276927	1.26046e+06	782609
Q8BZ98	Dynamin-3	Dnm3	109	5	1.247	0.711542	4.66143e+06	1.49204e+06	2.11872e+06	1.08061e+06	2.96908e+06	2.64181e+06
Q61656	Probable ATP-dependent RNA helicase DDX5	Ddx5	74	6	1.243	0.581646	630422	2.34592e+06	2.76806e+06	1.13352e+06	2.91562e+06	3.5771e+06
Q80SW1	S-adenosylhomocysteine hydrolase-like protein 1	Ahcyl1	150	7	1.238	0.160443	9.60234e+08	1.32743e+09	1.40623e+09	1.32578e+09	1.64334e+09	2.19844e+09
Q93092	Transaldolase	Taldo1	13	5	1.237	0.825411	239277	267530	411392	214361	449939	330973
Q8BVI4	Dihydropteridine reductase	Qdpr	33	3	1.235	0.462105	74645.1	1.01467e+06	1.10792e+06	486994	1.60592e+06	1.2527e+06
Q8BKZ9	Pyruvate dehydrogenase protein X component, mitochondrial	Pdhx	15	3	1.233	0.878435	105419	394423	417943	102064	490590	486299
P63085	Mitogen-activated protein kinase 1	Mapk1	43	5	1.229	0.400407	156496	1.13647e+06	1.18783e+06	716149	1.84272e+06	1.39621e+06
Q8R3V5	Endophilin-B2	Sh3glb2	16	4	1.222	0.79928	164170	226702	286587	153880	312607	277142
O55126	Protein NipSnap homolog 2	Nipsnap2	9	3	1.221	0.672836	50728.1	127802	190528	5327.94	241955	155986
Q9JJK2	LanC-like protein 2	Lancl2	4	3	1.21	0.640388	92237	240660	389874	148224	451569	291109
Q99MR8	Methylcrotonoyl-CoA carboxylase subunit alpha, mitochondrial	Mccc1	742	38	1.208	0.551583	1.71576e+07	6.84142e+07	6.60696e+07	3.27972e+07	7.98421e+07	8.80428e+07
P50516	V-type proton ATPase catalytic subunit A	Atp6v1a	149	19	1.207	0.424805	1.96584e+06	4.79056e+06	5.56603e+06	3.31801e+06	8.48483e+06	5.78169e+06
P33173	Kinesin-like protein KIF1A	Kif1a	6	2	1.207	0.864084	619637	191758	414037	81072	499588	786938
P18760	Cofilin-1	Cfl1	48	4	1.204	0.613665	1.17294e+07	5.06406e+06	4.17925e+06	2.9723e+06	6.09588e+06	6.953e+06
Q5SWU9	Acetyl-CoA carboxylase 1	Acaca	280	36	1.192	0.59972	4.05957e+06	1.34275e+07	1.07292e+07	6.9736e+06	1.27882e+07	1.37586e+07
Q02248	Catenin beta-1	Ctnnb1	10	4	1.19	0.475633	156759	409216	566197	322189	675110	486784
P43274	Histone H1.4	H1-4	103	2	1.188	0.42053	57183.4	2.08362e+06	2.34175e+06	1.56989e+06	2.47572e+06	2.84388e+06
P68368	Tubulin alpha-4A chain	Tuba4a	731	5	1.188	0.197212	1.38769e+07	1.62147e+07	1.69725e+07	2.89737e+07	1.68846e+07	1.92593e+07
Q7TSJ2	Microtubule-associated protein 6	Map6	12	4	1.187	0.813261	63656.7	142510	150425	56091.3	209705	169183
Q8VDQ8	NAD-dependent protein deacetylase sirtuin-2	Sirt2	62	9	1.184	0.68214	3.75313e+07	1.19417e+07	1.15043e+07	1.27838e+07	1.41434e+07	1.63523e+07
P30275	Creatine kinase U-type, mitochondrial	Ckmt1	180	11	1.184	0.454784	1.02137e+06	9.84403e+06	1.25469e+07	7.5245e+06	1.16564e+07	1.31534e+07
Q6ZQ38	Cullin-associated NEDD8-dissociated protein 1	Cand1	81	14	1.183	0.457585	200732	1.08739e+06	1.43373e+06	627988	2.40217e+06	1.28679e+06
P47738	Aldehyde dehydrogenase, mitochondrial	Aldh2	20	3	1.174	0.208466	167371	311119	348791	365263	535490	328092
Q91VR5	ATP-dependent RNA helicase DDX1	Ddx1	26	7	1.164	0.429268	428165	457152	640652	494941	789297	532162
P04370	Myelin basic protein	Mbp	103	5	1.161	0.467023	6.14594e+08	9.95013e+06	1.74659e+07	6.43707e+06	2.02711e+07	2.47659e+07
Q9DCX2	ATP synthase subunit d, mitochondrial	Atp5pd	11	3	1.157	0.562251	61751.6	645110	733700	210439	1.16465e+06	746368
Q8BPN8	DmX-like protein 2	Dmxl2	10	5	1.143	0.774716	313014	114679	183649	58955.9	310146	209921
P14206	40S ribosomal protein SA	Rpsa	5	2	1.133	0.933702	67974.4	196145	369720	87045.3	300692	222165
Q9EQH3	Vacuolar protein sorting-associated protein 35	Vps35	30	7	1.129	0.794677	163419	722304	906400	186387	1.37771e+06	815751
Q9R069	Basal cell adhesion molecule	Bcam	42	8	1.116	0.8487	590476	1.13651e+06	1.45281e+06	590431	1.26778e+06	1.67501e+06
Q3TEA8	Heterochromatin protein 1-binding protein 3	Hp1bp3	12	3	1.108	0.485196	109927	239695	306480	170496	481967	265653
Q8K3H0	DCC-interacting protein 13-alpha	Appl1	11	4	1.104	0.924877	34805.4	70249.4	62605	33762.1	72467.2	69088.7
P11881	Inositol 1,4,5-trisphosphate receptor type 1	Itpr1	536	70	1.103	0.764882	9.24296e+07	3.28254e+07	3.82729e+07	3.42154e+07	5.66249e+07	4.22294e+07
Q3UHD1	Adhesion G protein-coupled receptor B1	Adgrb1	4	2	1.101	0.625364	1.33417e+06	913855	1.18187e+06	939474	1.30137e+06	1.59822e+06
Q8CAQ8	MICOS complex subunit Mic60	Immt	96	16	1.092	0.641933	464980	6.14065e+06	7.62889e+06	2.16454e+06	6.70416e+06	6.90895e+06
P50428	Arylsulfatase A	Arsa	6	2	1.088	0.926521	72525.4	89649.4	98334.8	63567.5	97996.7	97581.1
Q6P5F9	Exportin-1	Xpo1	2	2	1.082	0.662448	48782.3	112035	156719	63104.1	229970	121223
Q00612	Glucose-6-phosphate 1-dehydrogenase X	G6pdx	13	2	1.081	0.564715	34266.4	181216	237206	111721	195826	241631
P43276	Histone H1.5	H1-5	42	4	1.069	0.895377	154699	1.07921e+06	1.25681e+06	198547	1.15386e+06	1.34374e+06
Q91ZA3	Propionyl-CoA carboxylase alpha chain, mitochondrial	Pcca	1935	47	1.064	0.843077	3.23585e+08	3.32074e+08	3.52105e+08	2.77649e+08	3.53327e+08	3.63579e+08
O35286	ATP-dependent RNA helicase DHX15	Dhx15	8	3	1.06	0.516985	49953.4	95748.6	136770	64779.6	365270	101536
P20029	Endoplasmic reticulum chaperone BiP	Hspa5	93	10	1.053	0.562166	393935	1.1459e+06	1.29933e+06	791580	1.38867e+06	1.20676e+06
P51174	Long-chain specific acyl-CoA dehydrogenase, mitochondrial	Acadl	11	4	1.05	0.531426	68809.1	348810	469385	366116	416776	284719
Q91VR2	ATP synthase subunit gamma, mitochondrial	Atp5f1c	56	7	1.048	0.414839	1.34748e+06	3.55684e+06	4.77257e+06	3.16057e+06	6.75396e+06	3.72916e+06
Q61753	D-3-phosphoglycerate dehydrogenase	Phgdh	62	8	1.034	0.521528	4.61691e+06	2.29094e+06	2.44791e+06	2.06042e+06	2.90309e+06	2.5308e+06
P61922	4-aminobutyrate aminotransferase, mitochondrial	Abat	169	20	1.031	0.55885	719636	5.76121e+06	6.17548e+06	2.2408e+06	9.57714e+06	5.94011e+06
Q61644	Protein kinase C and casein kinase substrate in neurons protein 1	Pacsin1	15	4	1.028	0.462844	94445.7	741704	737703	449694	995552	758089
Q8K1M6	Dynamin-1-like protein	Dnm1l	26	8	1.025	0.596346	193749	1.08307e+06	1.44539e+06	448445	2.40808e+06	1.11044e+06
Q8K400	Syntaxin-binding protein 5	Stxbp5	5	2	1	0.649329	48816.9	91512.9	94567	47122.8	198701	91503.3
P50518	V-type proton ATPase subunit E 1	Atp6v1e1	9	2	1	0.48842	39427.2	585357	593290	391142	586335	585286
Q922D8	C-1-tetrahydrofolate synthase, cytoplasmic	Mthfd1	12	3	0.997	0.728168	40715.7	59224	100318	22220	102369	59025.7
P49442	Inositol polyphosphate 1-phosphatase	Inpp1	12	4	0.969	0.820288	26449	161224	293321	44291.4	360033	156266
P35293	Ras-related protein Rab-18	Rab18	8	3	0.968	0.961532	118754	207213	293552	107591	358221	200494
Q05920	Pyruvate carboxylase, mitochondrial	Pc	2695	59	0.953	0.792724	7.57655e+08	6.96659e+08	6.793e+08	7.87567e+08	6.63948e+08	6.45411e+08
Q8BVQ5	Protein phosphatase methylesterase 1	Ppme1	6	2	0.949	0.781262	46965.2	124833	142913	20719.6	173754	118491
P50544	Very long-chain specific acyl-CoA dehydrogenase, mitochondrial	Acadvl	3	2	0.943	0.759603	64592.4	81932.6	89520	104243	77229.8	68754.4
Q920N2	Biotin--protein ligase	Hlcs	25	5	0.936	0.732251	123672	467901	458153	187679	613484	428722
Q3UGR5	Haloacid dehalogenase-like hydrolase domain-containing protein 2	Hdhd2	5	2	0.928	0.706635	4.89815e+06	1.8573e+06	2.21463e+06	3.5811e+06	1.74431e+06	2.05467e+06
Q9QUM9	Proteasome subunit alpha type-6	Psma6	6	2	0.927	0.553355	28869	332494	440438	149393	629975	308242
O70423	Membrane primary amine oxidase	Aoc3	72	11	0.92	0.845704	1.07098e+06	1.39026e+06	2.38203e+06	383995	1.27845e+06	4.45521e+06
P27773	Protein disulfide-isomerase A3	Pdia3	33	6	0.91	0.899356	335923	550159	556706	381679	586001	500593
Q8BGN8	Synaptoporin	Synpr	10	3	0.901	0.420222	3.89746e+06	198497	433640	64451.9	624843	390894
P63038	60 kDa heat shock protein, mitochondrial	Hspd1	84	17	0.886	0.791124	2.84484e+06	5.19146e+06	5.50592e+06	3.41393e+06	6.59206e+06	4.60014e+06
P63321	Ras-related protein Ral-A	Rala	3	2	0.866	0.836198	26405	66278.7	91080.1	24185.4	57381.5	81526.2
P48678	Prelamin-A/C	Lmna	15	6	0.86	0.827078	29205.5	175456	324200	79153.2	246150	150835
P14211	Calreticulin	Calr	27	5	0.852	0.583848	136666	569027	667818	403186	484620	724561
P03995	Glial fibrillary acidic protein	Gfap	121	4	0.833	0.666928	6.18204e+07	1.56011e+07	3.51854e+07	2.92943e+07	3.01262e+07	2.08716e+07
P01837	Immunoglobulin kappa constant	Igkc	6	2	0.81	0.863813	36085.1	44685	107059	36179.2	32257.2	219293
Q9D0I9	Arginine--tRNA ligase, cytoplasmic	Rars1	4	2	0.785	0.717802	13789.1	83798.4	113306	29882.8	176781	65745.6
P63323	40S ribosomal protein S12	Rps12	2	2	0.765	0.812137	20943.6	44798.9	42670.6	32642.2	82471.6	21349.4
O35737	Heterogeneous nuclear ribonucleoprotein H	Hnrnph1	47	5	0.678	0.753163	116826	2.02204e+06	2.21079e+06	441840	2.67813e+06	1.37113e+06
P30416	Peptidyl-prolyl cis-trans isomerase FKBP4	Fkbp4	8	2	0.517	0.778757	76526.4	183025	207340	82071.1	245758	94593.2
P53810	Phosphatidylinositol transfer protein alpha isoform	Pitpna	12	3	0.454	0.350567	233836	412851	563453	77155.2	505889	187310
O88737	Protein bassoon	Bsn	8	2	0.453	0.492766	16258.7	56002.1	57944.4	24168.6	30176.8	25391.2
Q9Z2U0	Proteasome subunit alpha type-7	Psma7	7	2	0.357	0.174276	20086.9	63900.2	42303.3	15110.8	12042.9	31997
Q9WV34	MAGUK p55 subfamily member 2	Mpp2	7	2	0.291	0.922637	13018.9	105725	285375	29299.1	668280	30767.8
O88910	MAGUK p55 subfamily member 3	Mpp3	4	2	0.238	0.196938	2.76385e+06	528074	276938	528568	125913	109974
Q9ESJ4	NCK-interacting protein with SH3 domain	Nckipsd	3	2	0.215	0.287283	16040.7	130780	105073	15598.6	35969.9	22586
