# Supplementary material for: Optochemical profiling of receptor-proximal proteins in vivo in minutes
Source: Research Square preprint supplement (doi:10.21203/rs.3.rs-3418321/v1), 2023-11-14
Supplement: Supplementary file 6 [file a2e43dd2976e1fed71525759.xlsx]

## Sheet: Legend
Supplementary Table 1
Proteomics data for PhoxID targeting AMPAR-proximal proteins in the hippocampus (integrated data from n=3 biological replicates x 2 technical replicates)
Sheet name	Description
S1-1	Hippocampus, hit proteins only
S1-2	Hippocampus, all detected proteins

## Sheet: S1-1. Hippocampus, hits
UniProt ID	Protein	Gene	# PSMs	# unique peptides	Median fold change: PhoxID with compound 1 vs. 2	Fold change p-value	Abundances (Grouped): Compound 2, Bio. Rep. 1	Abundances (Grouped): Compound 2, Bio. Rep. 2	Abundances (Grouped): Compound 2, Bio. Rep. 3	Abundances (Grouped): Compound 1, Bio. Rep. 1	Abundances (Grouped): Compound 1, Bio. Rep. 2	Abundances (Grouped): Compound 1, Bio. Rep. 3	Reference for interactions with GRIA1–4 (related to Fig. 1b)	Reference for subsynaptic annotation (related to Fig. 1b, d)
P23818	Glutamate receptor 1	Gria1	83	14	6.47	0.0082179	568199	704859	641930	3.9542e+06	8.04723e+06	4.15333e+06	STRING 11.5	UniProt (release 2023-2)
Q9Z2W9	Glutamate receptor 3	Gria3	67	12	6.248	0.00611607	414584	471920	519425	2.60513e+06	5.0552e+06	2.94879e+06	STRING 11.5	UniProt (release 2023-2)
P35436	Glutamate receptor ionotropic, NMDA 2A	Grin2a	3	1	5.486	0.0188907	59784.1	27026.4	20404.3	116598	238086	148263	STRING 11.5	UniProt (release 2023-2)
Q810U4	Neuronal cell adhesion molecule	Nrcam	11	4	4.919	0.00984033	80254.8	144602	227238	711333	1.33232e+06	710218	STRING 11.5	UniProt (release 2023-2)
P15116	Cadherin-2	Cdh2	8	3	4.811	0.0170049	30229.5	34189	48613.8	144802	387691	164472	STRING 11.5	UniProt (release 2023-2)
Q9D1T0	Leucine-rich repeat and immunoglobulin-like domain-containing nogo receptor-interacting protein 1	Lingo1	17	4	4.804	0.0127301	133145	141340	169970	589674	1.2681e+06	678956	STRING 11.5	Ref [14]
Q62443	Neuronal pentraxin-1	Nptx1	1	1	4.775	0.00136708	39284.6	25954.3	34258.2	114725	184848	163576	Xu et al. Neuron. 2003;39(3):513-28.	Ref [14]
P35438	Glutamate receptor ionotropic, NMDA 1	Grin1	19	6	4.601	0.0126436	274186	318285	297029	1.18677e+06	2.35527e+06	1.36662e+06	STRING 11.5	UniProt (release 2023-2)
Q60625	Intercellular adhesion molecule 5	Icam5	89	12	4.555	0.00626836	578392	873464	1.17942e+06	3.14552e+06	6.92423e+06	3.97894e+06	STRING 11.5	Ref [14]
O88998	Noelin	Olfm1	1	1	4.497	0.000925017	127294	144297	96778.5	424204	635989	572475	STRING 11.5	UniProt (release 2023-2)
Q9CPW0	Contactin-associated protein-like 2	Cntnap2	15	6	3.87	0.00720289	124479	176353	105337	481787	619170	327272	STRING 11.5	UniProt (release 2023-2)
Q99K10	Neuroligin-1	Nlgn1	3	1	3.769	0.00628886	34326.8	21447.8	19893.8	73019.5	132705	80833.7	STRING 11.5	UniProt (release 2023-2)
Q8BYI9	Tenascin-R	Tnr	151	27	3.228	0.0140339	1.73044e+06	3.65992e+06	4.04837e+06	1.1816e+07	1.82204e+07	9.84835e+06	STRING 11.5	UniProt (release 2023-2)
Q61361	Brevican core protein	Bcan	25	5	3.213	0.0351614	302540	435637	767902	1.39967e+06	1.83638e+06	1.15826e+06	Ref [35]	UniProt (release 2023-2)
O54991	Contactin-associated protein 1	Cntnap1	14	6	3.195	0.0557071	183632	179515	176277	573581	760263	314422	STRING 11.5	Ref [14]
Q9QZF2	Glypican-1	Gpc1	3	1	3.185	0.0295535	15922.8	38339.7	53150.6	122113	234956	116924	STRING 11.5	UniProt (release 2023-2)
O35136	Neural cell adhesion molecule 2	Ncam2	10	4	3.183	0.00894978	160612	184295	197747	500200	861729	586698	STRING 11.5	Parcerisas et al. Int J Mol Sci. 2021;22(18):10021.
Q99PJ0	Neurotrimin	Ntm	9	2	3.036	0.00917609	114225	113123	164098	273538	481810	346786	STRING 11.5	Ref [14]
P55066	Neurocan core protein	Ncan	10	3	2.965	0.0124829	102216	130091	195265	339151	630266	385745	STRING 11.5	UniProt (release 2023-2)
P23819	Glutamate receptor 2	Gria2	114	18	2.879	0.0104763	1.37793e+06	2.89486e+06	2.50346e+06	7.05614e+06	1.32755e+07	7.20804e+06	STRING 11.5	UniProt (release 2023-2)
Q63912	Oligodendrocyte-myelin glycoprotein	Omg	12	3	2.841	0.0132306	71406.6	149511	134572	382288	641412	318039	STRING 11.5	UniProt (release 2023-2)
Q8BGN3	Glycerophosphocholine cholinephosphodiesterase ENPP6	Enpp6	4	2	2.795	0.0374611	57982	138199	126310	376596	353010	273424	STRING 11.5	UniProt (release 2023-2)
Q71M36	Chondroitin sulfate proteoglycan 5	Cspg5	8	2	2.761	0.0536337	114824	124885	135704	184968	344755	345320	STRING 11.5	UniProt (release 2023-2)
O88322	Nidogen-2	Nid2	5	2	2.647	0.0996617	10680.3	15605.3	39193.5	40171.2	87185.7	41308.3	STRING 11.5	UniProt (release 2023-2)
P97797	Tyrosine-protein phosphatase non-receptor type substrate 1	Sirpa	23	5	2.632	0.0120706	256466	482265	372007	979014	1.30396e+06	862910	STRING 11.5	UniProt (release 2023-2)
Q810U3	Neurofascin	Nfasc	47	10	2.591	0.0058369	474744	773560	688837	1.78499e+06	2.68013e+06	1.62588e+06	STRING 11.5	UniProt (release 2023-2)
Q56A07	Sodium channel subunit beta-2	Scn2b	8	1	2.456	0.00699706	171755	267550	203564	428131	599668	500021	STRING 11.5	UniProt (release 2023-2)
Q9Z218	Dipeptidyl aminopeptidase-like protein 6	Dpp6	24	7	2.379	0.0333237	266943	505017	434592	1.03374e+06	2.31951e+06	907933	STRING 11.5	UniProt (release 2023-2)
Q8C3Q5	Protein shisa-7	Shisa7	3	2	2.37	0.0255614	103615	87321.5	53159.6	165686	365220	206938	Ref [41]	UniProt (release 2023-2)
Q9WUA3	ATP-dependent 6-phosphofructokinase, platelet type	Pfkp	19	2	2.322	0.0337216	41753.2	26921.6	27247.9	54264	63404	63259	STRING 11.5	UniProt (release 2023-2)
B9EKR1	Receptor-type tyrosine-protein phosphatase zeta	Ptprz1	5	1	2.312	0.0909921	63689.6	233033	213527	493760	624747	358172	STRING 11.5	UniProt (release 2023-2)
P02468	Laminin subunit gamma-1	Lamc1	2	1	2.304	0.0417919	30739.9	29031.9	51434.1	58085.1	106223	70835.8	STRING 11.5	UniProt (release 2023-2)
Q9JII6	Aldo-keto reductase family 1 member A1	Akr1a1	1	1	2.258	0.0851758	27396.9	35883.9	38556.4	42954.5	100400	81035.3	STRING 11.5	UniProt (release 2023-2)
Q05793	Basement membrane-specific heparan sulfate proteoglycan core protein	Hspg2	10	5	2.244	0.0243324	155058	128276	169879	347953	637573	341625	STRING 11.5	UniProt (release 2023-2)
Q8R366	Immunoglobulin superfamily member 8	Igsf8	15	4	2.241	0.0536816	120783	264836	188118	421566	495606	301198	STRING 11.5	Apóstolo et al. Nat Commun. 2020;11(1):5171.
Q9QUP5	Hyaluronan and proteoglycan link protein 1	Hapln1	15	4	2.23	0.0192968	265506	419811	493322	936233	1.73297e+06	886940	STRING 11.5	UniProt (release 2023-2)
O88507	Ciliary neurotrophic factor receptor subunit alpha	Cntfr	10	3	2.124	0.0207025	77078.1	151953	140258	297977	479857	269360	STRING 11.5	UniProt (release 2023-2)
P12960	Contactin-1	Cntn1	330	29	2.118	0.0178751	8.80086e+06	1.26172e+07	1.01313e+07	2.14582e+07	2.5148e+07	1.59626e+07	STRING 11.5	UniProt (release 2023-2)
Q9JIA1	Leucine-rich glioma-inactivated protein 1	Lgi1	10	2	2.096	0.00596254	207254	256509	282655	519094	590598	537667	STRING 11.5	UniProt (release 2023-2)
Q8BLK3	Limbic system-associated membrane protein	Lsamp	37	4	2.083	0.0179881	309809	527313	581380	1.09852e+06	1.61856e+06	1.03744e+06	STRING 11.5	Ref [14]
Q9CR95	Adaptin ear-binding coat-associated protein 1	Necap1	8	3	2.057	0.0135914	55595.1	58229.8	55300.7	114342	90089.3	115873	STRING 11.5	UniProt (release 2023-2)
P10493	Nidogen-1	Nid1	13	4	2.049	0.029282	183114	300924	360854	526870	1.00029e+06	616555	STRING 11.5	UniProt (release 2023-2)
P14231	Sodium/potassium-transporting ATPase subunit beta-2	Atp1b2	34	2	1.932	0.0162268	805355	1.26592e+06	1.16194e+06	1.80756e+06	2.56925e+06	2.24522e+06	STRING 11.5	UniProt (release 2023-2)
Q8K3H0	DCC-interacting protein 13-alpha	Appl1	2	1	1.908	0.0157803	26594.5	32547.6	24297.7	50754.7	39104.7	54813	STRING 11.5	UniProt (release 2023-2)
Q61330	Contactin-2	Cntn2	3	2	1.895	0.011172	51032	59308.1	39699.9	96692.9	114119	88230.5	STRING 11.5	UniProt (release 2023-2)
Q99N28	Cell adhesion molecule 3	Cadm3	36	4	1.845	0.0280884	328884	536865	380357	701629	928582	689682	STRING 11.5	UniProt (release 2023-2)
Q8VHW2	Voltage-dependent calcium channel gamma-8 subunit	Cacng8	21	3	1.823	0.00105849	432350	423296	390418	771719	722182	858022	STRING 11.5	UniProt (release 2023-2)
Q8R464	Cell adhesion molecule 4	Cadm4	26	5	1.809	0.00502021	281279	284552	220190	508967	604962	445206	STRING 11.5	Ref [14]
P01831	Thy-1 membrane glycoprotein	Thy1	51	5	1.795	0.0499848	1.37486e+06	2.25255e+06	2.42388e+06	3.21385e+06	4.04375e+06	4.09037e+06	STRING 11.5	UniProt (release 2023-2)
P10852	4F2 cell-surface antigen heavy chain	Slc3a2	31	6	1.761	0.0381788	198760	351993	399653	586223	978267	619909	STRING 11.5	UniProt (release 2023-2)
Q6VNS1	NT-3 growth factor receptor	Ntrk3	3	1	1.72	0.0750257	54413.3	50371.5	33278.9	69454	169071	86650.9	STRING 11.5	UniProt (release 2023-2)
Q8K377	Leucine-rich repeat transmembrane neuronal protein 1	Lrrtm1	7	2	1.69	0.0366164	40552.8	33870.9	52711.8	60243.5	91453.5	68529.2	Bhouri et al. Proc Natl Acad Sci U S A. 2018;115(23):E5382-E5389.	UniProt (release 2023-2)
P13595	Neural cell adhesion molecule 1	Ncam1	97	13	1.606	0.0470469	3.00808e+06	4.93658e+06	4.2924e+06	6.81484e+06	7.88465e+06	6.89292e+06	STRING 11.5	UniProt (release 2023-2)
P40124	Adenylyl cyclase-associated protein 1	Cap1	18	2	1.603	0.00641815	323029	384736	305300	517968	604595	516090	STRING 11.6	UniProt (release 2023-2)
P31650	Sodium- and chloride-dependent GABA transporter 3	Slc6a11	12	3	1.579	0.0975302	390957	575040	394239	809982	622426	541121	STRING 11.7	UniProt (release 2023-2)
P31648	Sodium- and chloride-dependent GABA transporter 1	Slc6a1	18	2	1.551	0.0446683	764830	1.05082e+06	842798	1.32281e+06	1.16765e+06	1.30728e+06	STRING 11.8	UniProt (release 2023-2)
Q6PHN9	Ras-related protein Rab-35	Rab35	23	2	1.519	0.0343079	1.27222e+06	1.50847e+06	1.24588e+06	1.93251e+06	1.56728e+06	1.96984e+06	STRING 11.9	UniProt (release 2023-2)
Q8BYM5	Neuroligin-3	Nlgn3	9	2	1.505	0.0848522	74478.5	58382	79959.6	109444	225688	112127	STRING 11.10	UniProt (release 2023-2)

## Sheet: S1-2. Hippocampus, all
UniProt ID	Protein	Gene	# PSMs	# unique peptides	Median fold change: PhoxID with compound 1 vs. 2	Fold change p-value	Abundances (Grouped): Compound 2, Bio. Rep. 1	Abundances (Grouped): Compound 2, Bio. Rep. 2	Abundances (Grouped): Compound 2, Bio. Rep. 3	Abundances (Grouped): Compound 1, Bio. Rep. 1	Abundances (Grouped): Compound 1, Bio. Rep. 2	Abundances (Grouped): Compound 1, Bio. Rep. 3
P23818	Glutamate receptor 1	Gria1	83	14	6.47	0.0082179	568199	704859	641930	3.9542e+06	8.04723e+06	4.15333e+06
Q9Z2W9	Glutamate receptor 3	Gria3	67	12	6.248	0.00611607	414584	471920	519425	2.60513e+06	5.0552e+06	2.94879e+06
P35436	Glutamate receptor ionotropic, NMDA 2A	Grin2a	3	1	5.486	0.0188907	59784.1	27026.4	20404.3	116598	238086	148263
Q810U4	Neuronal cell adhesion molecule	Nrcam	11	4	4.919	0.00984033	80254.8	144602	227238	711333	1.33232e+06	710218
P15116	Cadherin-2	Cdh2	8	3	4.811	0.0170049	30229.5	34189	48613.8	144802	387691	164472
Q9D1T0	Leucine-rich repeat and immunoglobulin-like domain-containing nogo receptor-interacting protein 1	Lingo1	17	4	4.804	0.0127301	133145	141340	169970	589674	1.2681e+06	678956
Q62443	Neuronal pentraxin-1	Nptx1	1	1	4.775	0.00136708	39284.6	25954.3	34258.2	114725	184848	163576
P35438	Glutamate receptor ionotropic, NMDA 1	Grin1	19	6	4.601	0.0126436	274186	318285	297029	1.18677e+06	2.35527e+06	1.36662e+06
Q60625	Intercellular adhesion molecule 5	Icam5	89	12	4.555	0.00626836	578392	873464	1.17942e+06	3.14552e+06	6.92423e+06	3.97894e+06
O88998	Noelin	Olfm1	1	1	4.497	0.000925017	127294	144297	96778.5	424204	635989	572475
Q9CPW0	Contactin-associated protein-like 2	Cntnap2	15	6	3.87	0.00720289	124479	176353	105337	481787	619170	327272
Q99K10	Neuroligin-1	Nlgn1	3	1	3.769	0.00628886	34326.8	21447.8	19893.8	73019.5	132705	80833.7
Q8BI08	Protein MAL2	Mal2	7	1	3.383	0.26014	102301	96690.4	414251	346098	254060	419062
Q8BYI9	Tenascin-R	Tnr	151	27	3.228	0.0140339	1.73044e+06	3.65992e+06	4.04837e+06	1.1816e+07	1.82204e+07	9.84835e+06
Q61361	Brevican core protein	Bcan	25	5	3.213	0.0351614	302540	435637	767902	1.39967e+06	1.83638e+06	1.15826e+06
O54991	Contactin-associated protein 1	Cntnap1	14	6	3.195	0.0557071	183632	179515	176277	573581	760263	314422
Q9QZF2	Glypican-1	Gpc1	3	1	3.185	0.0295535	15922.8	38339.7	53150.6	122113	234956	116924
O35136	Neural cell adhesion molecule 2	Ncam2	10	4	3.183	0.00894978	160612	184295	197747	500200	861729	586698
Q99PJ0	Neurotrimin	Ntm	9	2	3.036	0.00917609	114225	113123	164098	273538	481810	346786
Q9D3A9	Protein tweety homolog 1	Ttyh1	6	1	3.008	0.241132	21462.9	44253.1	113055	63888.9	134486	133121
P55066	Neurocan core protein	Ncan	10	3	2.965	0.0124829	102216	130091	195265	339151	630266	385745
P43276	Histone H1.5	H1-5	7	1	2.911	0.286512	104273	43536.9	24042.8	186951	43546.7	126736
P23819	Glutamate receptor 2	Gria2	114	18	2.879	0.0104763	1.37793e+06	2.89486e+06	2.50346e+06	7.05614e+06	1.32755e+07	7.20804e+06
Q63912	Oligodendrocyte-myelin glycoprotein	Omg	12	3	2.841	0.0132306	71406.6	149511	134572	382288	641412	318039
Q8BGN3	Glycerophosphocholine cholinephosphodiesterase ENPP6	Enpp6	4	2	2.795	0.0374611	57982	138199	126310	376596	353010	273424
Q60864	Stress-induced-phosphoprotein 1	Stip1	5	1	2.777	0.40463	38031.1	37670.4	191373	95126	105610	150082
Q71M36	Chondroitin sulfate proteoglycan 5	Cspg5	8	2	2.761	0.0536337	114824	124885	135704	184968	344755	345320
O88322	Nidogen-2	Nid2	5	2	2.647	0.0996617	10680.3	15605.3	39193.5	40171.2	87185.7	41308.3
P97797	Tyrosine-protein phosphatase non-receptor type substrate 1	Sirpa	23	5	2.632	0.0120706	256466	482265	372007	979014	1.30396e+06	862910
Q810U3	Neurofascin	Nfasc	47	10	2.591	0.0058369	474744	773560	688837	1.78499e+06	2.68013e+06	1.62588e+06
Q62283	Tetraspanin-7	Tspan7	4	1	2.47	0.166403	56347.8	54892.9	116426	86278.1	140680	139200
Q56A07	Sodium channel subunit beta-2	Scn2b	8	1	2.456	0.00699706	171755	267550	203564	428131	599668	500021
Q9Z218	Dipeptidyl aminopeptidase-like protein 6	Dpp6	24	7	2.379	0.0333237	266943	505017	434592	1.03374e+06	2.31951e+06	907933
Q8C3Q5	Protein shisa-7	Shisa7	3	2	2.37	0.0255614	103615	87321.5	53159.6	165686	365220	206938
Q9WUA3	ATP-dependent 6-phosphofructokinase, platelet type	Pfkp	19	2	2.322	0.0337216	41753.2	26921.6	27247.9	54264	63404	63259
B9EKR1	Receptor-type tyrosine-protein phosphatase zeta	Ptprz1	5	1	2.312	0.0909921	63689.6	233033	213527	493760	624747	358172
P02468	Laminin subunit gamma-1	Lamc1	2	1	2.304	0.0417919	30739.9	29031.9	51434.1	58085.1	106223	70835.8
Q9JII6	Aldo-keto reductase family 1 member A1	Akr1a1	1	1	2.258	0.0851758	27396.9	35883.9	38556.4	42954.5	100400	81035.3
Q05793	Basement membrane-specific heparan sulfate proteoglycan core protein	Hspg2	10	5	2.244	0.0243324	155058	128276	169879	347953	637573	341625
Q8R366	Immunoglobulin superfamily member 8	Igsf8	15	4	2.241	0.0536816	120783	264836	188118	421566	495606	301198
Q9QUP5	Hyaluronan and proteoglycan link protein 1	Hapln1	15	4	2.23	0.0192968	265506	419811	493322	936233	1.73297e+06	886940
O88507	Ciliary neurotrophic factor receptor subunit alpha	Cntfr	10	3	2.124	0.0207025	77078.1	151953	140258	297977	479857	269360
Q8VEH3	ADP-ribosylation factor-like protein 8A	Arl8a	12	1	2.118	0.561429	119076	80950.3	45241	171473	40556.1	190899
P12960	Contactin-1	Cntn1	330	29	2.118	0.0178751	8.80086e+06	1.26172e+07	1.01313e+07	2.14582e+07	2.5148e+07	1.59626e+07
Q9JIA1	Leucine-rich glioma-inactivated protein 1	Lgi1	10	2	2.096	0.00596254	207254	256509	282655	519094	590598	537667
Q8BLK3	Limbic system-associated membrane protein	Lsamp	37	4	2.083	0.0179881	309809	527313	581380	1.09852e+06	1.61856e+06	1.03744e+06
Q9CR95	Adaptin ear-binding coat-associated protein 1	Necap1	8	3	2.057	0.0135914	55595.1	58229.8	55300.7	114342	90089.3	115873
P10493	Nidogen-1	Nid1	13	4	2.049	0.029282	183114	300924	360854	526870	1.00029e+06	616555
P14231	Sodium/potassium-transporting ATPase subunit beta-2	Atp1b2	34	2	1.932	0.0162268	805355	1.26592e+06	1.16194e+06	1.80756e+06	2.56925e+06	2.24522e+06
Q8K3H0	DCC-interacting protein 13-alpha	Appl1	2	1	1.908	0.0157803	26594.5	32547.6	24297.7	50754.7	39104.7	54813
Q61330	Contactin-2	Cntn2	3	2	1.895	0.011172	51032	59308.1	39699.9	96692.9	114119	88230.5
O88935	Synapsin-1	Syn1	107	12	1.886	0.193293	1.51513e+06	2.17469e+06	4.07793e+06	4.10098e+06	2.92141e+06	6.42294e+06
Q80XN0	D-beta-hydroxybutyrate dehydrogenase, mitochondrial	Bdh1	2	2	1.849	0.592168	97455	91166.7	302790	180199	111957	315641
Q99N28	Cell adhesion molecule 3	Cadm3	36	4	1.845	0.0280884	328884	536865	380357	701629	928582	689682
Q8VHW2	Voltage-dependent calcium channel gamma-8 subunit	Cacng8	21	3	1.823	0.00105849	432350	423296	390418	771719	722182	858022
P61922	4-aminobutyrate aminotransferase, mitochondrial	Abat	7	4	1.812	0.402787	110774	132452	267741	240065	150224	275728
Q8R464	Cell adhesion molecule 4	Cadm4	26	5	1.809	0.00502021	281279	284552	220190	508967	604962	445206
P01831	Thy-1 membrane glycoprotein	Thy1	51	5	1.795	0.0499848	1.37486e+06	2.25255e+06	2.42388e+06	3.21385e+06	4.04375e+06	4.09037e+06
P10852	4F2 cell-surface antigen heavy chain	Slc3a2	31	6	1.761	0.0381788	198760	351993	399653	586223	978267	619909
Q8C0M9	Isoaspartyl peptidase/L-asparaginase	Asrgl1	33	5	1.745	0.588616	467558	1.11189e+06	239155	956225	815705	403756
Q9Z0P5	Twinfilin-2	Twf2	8	2	1.734	0.244818	62038.7	34587.5	31936.4	59989.5	45833.4	70124.4
Q6VNS1	NT-3 growth factor receptor	Ntrk3	3	1	1.72	0.0750257	54413.3	50371.5	33278.9	69454	169071	86650.9
Q8K377	Leucine-rich repeat transmembrane neuronal protein 1	Lrrtm1	7	2	1.69	0.0366164	40552.8	33870.9	52711.8	60243.5	91453.5	68529.2
P20917	Myelin-associated glycoprotein	Mag	43	8	1.679	0.245924	340293	1.48994e+06	1.13369e+06	1.90298e+06	2.04106e+06	1.30976e+06
Q99104	Unconventional myosin-Va	Myo5a	2	1	1.646	0.293847	15561.6	38382.8	59799.5	63171.7	45840.5	65287.4
P13595	Neural cell adhesion molecule 1	Ncam1	97	13	1.606	0.0470469	3.00808e+06	4.93658e+06	4.2924e+06	6.81484e+06	7.88465e+06	6.89292e+06
P09470	Angiotensin-converting enzyme	Ace	1	1	1.604	0.14773	53115.8	33808.3	14804.7	54232.7	114525	52624.1
P40124	Adenylyl cyclase-associated protein 1	Cap1	18	2	1.603	0.00641815	323029	384736	305300	517968	604595	516090
P31650	Sodium- and chloride-dependent GABA transporter 3	Slc6a11	12	3	1.579	0.0975302	390957	575040	394239	809982	622426	541121
Q9CR62	Mitochondrial 2-oxoglutarate/malate carrier protein	Slc25a11	5	1	1.552	0.349086	179964	28870.2	319163	240162	279344	344179
P31648	Sodium- and chloride-dependent GABA transporter 1	Slc6a1	18	2	1.551	0.0446683	764830	1.05082e+06	842798	1.32281e+06	1.16765e+06	1.30728e+06
P51150	Ras-related protein Rab-7a	Rab7a	27	4	1.52	0.120903	692072	622955	957826	1.10795e+06	908603	1.05208e+06
Q6PHN9	Ras-related protein Rab-35	Rab35	23	2	1.519	0.0343079	1.27222e+06	1.50847e+06	1.24588e+06	1.93251e+06	1.56728e+06	1.96984e+06
Q8BYM5	Neuroligin-3	Nlgn3	9	2	1.505	0.0848522	74478.5	58382	79959.6	109444	225688	112127
Q9D2G2	Dihydrolipoyllysine-residue succinyltransferase component of 2-oxoglutarate dehydrogenase complex, mitochondrial	Dlst	30	3	1.487	0.0191826	552405	732603	725169	1.07859e+06	924254	1.16297e+06
Q9CQD1	Ras-related protein Rab-5A	Rab5a	14	1	1.476	0.266746	103764	123821	35080.8	153162	108901	161250
P67984	60S ribosomal protein L22	Rpl22	2	1	1.471	0.713973	50254.4	75340.7	38963.8	35681.3	73901.3	82352.8
Q9D023	Mitochondrial pyruvate carrier 2	Mpc2	9	1	1.46	0.00415619	77550.4	87005.9	74500.2	112651	113225	123389
O88343	Electrogenic sodium bicarbonate cotransporter 1	Slc4a4	11	4	1.458	0.0564751	195259	280757	256161	373554	376158	372743
Q8BZ98	Dynamin-3	Dnm3	43	1	1.456	0.0916547	329097	372235	461364	452899	541949	720242
Q60931	Voltage-dependent anion-selective channel protein 3	Vdac3	82	7	1.448	0.106632	6.95913e+06	9.44271e+06	7.38208e+06	1.44055e+07	9.08067e+06	1.06924e+07
Q8C1B7	Septin-11	Septin11	80	5	1.444	0.256068	2.77368e+06	3.55672e+06	2.68056e+06	4.03948e+06	2.88612e+06	4.00609e+06
Q3UVX5	Metabotropic glutamate receptor 5	Grm5	7	2	1.443	0.0801171	82829.8	79841.4	57958.1	110247	222088	115199
Q68ED2	Metabotropic glutamate receptor 7	Grm7	4	1	1.443	0.0552243	43014.5	39240.7	34279.1	56009.9	88206.4	56612.4
P97379	Ras GTPase-activating protein-binding protein 2	G3bp2	2	1	1.441	0.974759	72878.4	29842.9	34401	57570	25239.8	49573.5
P97300	Neuroplastin	Nptn	90	8	1.434	0.0353572	1.7364e+07	2.38223e+07	2.25493e+07	3.23269e+07	3.44316e+07	3.03786e+07
P14131	40S ribosomal protein S16	Rps16	2	1	1.427	0.196437	829626	1.50125e+06	1.24424e+06	1.77613e+06	1.78556e+06	1.31172e+06
P43006	Excitatory amino acid transporter 2	Slc1a2	191	14	1.427	0.182461	2.52677e+07	3.3483e+07	2.35145e+07	3.69489e+07	3.60595e+07	2.88353e+07
P03921	NADH-ubiquinone oxidoreductase chain 5	Mtnd5	10	2	1.414	0.0169884	160304	193434	166022	261007	234810	215754
Q61292	Laminin subunit beta-2	Lamb2	14	7	1.412	0.210936	214325	207513	139883	293030	782815	215442
Q8K386	Ras-related protein Rab-15	Rab15	34	1	1.409	0.12334	1.79443e+06	2.29086e+06	1.88e+06	2.76671e+06	2.08304e+06	2.64894e+06
Q9Z1S5	Neuronal-specific septin-3	Septin3	4	1	1.406	0.0916587	194483	195617	107384	273418	232039	333856
P21550	Beta-enolase	Eno3	50	1	1.404	0.161438	466020	762789	574659	890177	693804	806819
Q8CHC4	Synaptojanin-1	Synj1	32	8	1.393	0.194812	546285	695469	900323	968792	770197	1.04931e+06
Q91VD9	NADH-ubiquinone oxidoreductase 75 kDa subunit, mitochondrial	Ndufs1	21	4	1.392	0.9034	131462	142068	305898	197789	128208	256930
Q99JG2	G-protein coupled receptor 37-like 1	Gpr37l1	7	2	1.386	0.468219	50305.7	71485.3	51677.1	85116.6	71614.1	49230.9
Q61206	Platelet-activating factor acetylhydrolase IB subunit alpha2	Pafah1b2	5	1	1.382	0.00930677	93229.2	87765.8	102186	122497	131902	128812
P16054	Protein kinase C epsilon type	Prkce	3	1	1.373	0.713935	35370.7	31182.3	48093.2	48558.9	23884.9	69168.1
Q8BK64	Activator of 90 kDa heat shock protein ATPase homolog 1	Ahsa1	11	2	1.367	0.278579	36660.9	89627.9	110399	122545	89291.9	147191
Q9D1G1	Ras-related protein Rab-1B	Rab1b	28	3	1.361	0.311881	922909	1.41705e+06	975587	1.45715e+06	1.14511e+06	1.32818e+06
B0V2N1	Receptor-type tyrosine-protein phosphatase S	Ptprs	3	2	1.356	0.650521	34546.3	26869.1	24498.2	16163.9	36428.3	81480.6
P62812	Gamma-aminobutyric acid receptor subunit alpha-1	Gabra1	9	1	1.35	0.111292	163988	253531	200519	255783	270773	312359
P61205	ADP-ribosylation factor 3	Arf3	166	8	1.345	0.230248	7.41734e+06	1.12555e+07	7.56504e+06	1.31669e+07	9.67581e+06	1.01725e+07
Q60771	Claudin-11	Cldn11	7	1	1.339	0.454362	742755	1.3201e+06	1.45491e+06	1.91329e+06	1.7679e+06	918629
Q9QY76	Vesicle-associated membrane protein-associated protein B	Vapb	4	1	1.337	0.243883	127016	117577	139567	169758	122211	184544
Q8CHH9	Septin-8	Septin8	56	4	1.333	0.617636	603687	896889	598523	954688	804577	581166
P62702	40S ribosomal protein S4, X isoform	Rps4x	6	2	1.328	0.38926	100731	90356	194275	133782	133349	247600
Q8K2B3	Succinate dehydrogenase	Sdha	12	4	1.326	0.697255	340310	384532	520176	510047	330197	515427
P62823	Ras-related protein Rab-3C	Rab3c	48	3	1.325	0.0583225	1.65124e+06	1.9895e+06	1.5963e+06	2.18856e+06	2.18415e+06	2.31836e+06
P63011	Ras-related protein Rab-3A	Rab3a	94	5	1.323	0.0659868	7.82665e+06	1.02509e+07	8.88289e+06	1.21074e+07	1.15803e+07	1.17562e+07
P35276	Ras-related protein Rab-3D	Rab3d	29	1	1.322	0.0602843	637893	877127	815054	1.1435e+06	1.0343e+06	1.0777e+06
Q64332	Synapsin-2	Syn2	108	12	1.32	0.43451	5.01699e+06	5.64884e+06	8.04183e+06	7.45398e+06	5.48583e+06	1.00198e+07
P35564	Calnexin	Canx	1	1	1.319	0.335326	35240.7	45206.2	26564.6	46486.8	48405.9	34914.6
Q5M8N0	CB1 cannabinoid receptor-interacting protein 1	Cnrip1	40	3	1.319	0.168365	932255	1.42283e+06	1.15595e+06	1.60216e+06	1.32097e+06	1.52439e+06
Q99PT1	Rho GDP-dissociation inhibitor 1	Arhgdia	79	6	1.317	0.199556	2.65197e+06	3.4088e+06	2.46329e+06	3.82852e+06	2.96485e+06	3.49267e+06
P61226	Ras-related protein Rap-2b	Rap2b	17	2	1.317	0.538093	509617	735412	502594	723579	531949	670966
P62743	AP-2 complex subunit sigma	Ap2s1	18	2	1.314	0.0999055	560550	832253	777623	1.10745e+06	850621	1.02152e+06
P59999	Actin-related protein 2/3 complex subunit 4	Arpc4	25	4	1.307	0.167544	472491	585383	725742	860270	658253	765352
P35293	Ras-related protein Rab-18	Rab18	2	1	1.306	0.521387	107379	153071	109299	147973	114644	142773
P43274	Histone H1.4	H1-4	21	1	1.305	0.0952227	186174	240707	185644	300825	239653	242976
Q91YR1	Twinfilin-1	Twf1	4	1	1.301	0.667068	88188.3	59362.3	148307	120290	85080.3	114742
Q8BGH2	Sorting and assembly machinery component 50 homolog	Samm50	27	4	1.298	0.364204	218802	301137	238532	309596	358219	232123
Q9WV92	Band 4.1-like protein 3	Epb41l3	8	3	1.292	0.0247269	65098.2	80332.5	73128	116151	93681.4	94467.7
P08249	Malate dehydrogenase, mitochondrial	Mdh2	206	15	1.29	0.278226	9.73442e+06	1.34424e+07	1.05012e+07	1.42892e+07	1.1265e+07	1.35477e+07
Q9CQW2	ADP-ribosylation factor-like protein 8B	Arl8b	10	1	1.289	0.110565	195653	273877	237556	313060	286417	306182
P84091	AP-2 complex subunit mu	Ap2m1	47	11	1.287	0.0564578	2.36364e+06	3.06743e+06	2.71642e+06	3.49574e+06	3.40971e+06	3.72474e+06
Q60930	Voltage-dependent anion-selective channel protein 2	Vdac2	87	9	1.284	0.482697	1.0242e+07	1.45571e+07	6.58434e+06	1.44855e+07	1.31468e+07	9.6122e+06
P51881	ADP/ATP translocase 2	Slc25a5	226	6	1.283	0.0496909	4.37584e+06	5.24477e+06	4.50115e+06	6.27978e+06	5.77489e+06	5.31584e+06
P17897	Lysozyme C-1	Lyz1	28	3	1.281	0.996571	2.02008e+06	3.65703e+06	2.13099e+06	2.7291e+06	2.7641e+06	2.09309e+06
P62827	GTP-binding nuclear protein Ran	Ran	57	6	1.28	0.0635624	1.51655e+06	1.88979e+06	1.56572e+06	2.2124e+06	1.97164e+06	2.00442e+06
Q91YT0	NADH dehydrogenase	Ndufv1	2	2	1.275	0.684878	49498.2	66411.5	149950	84676.2	80000.3	117882
Q9CZY3	Ubiquitin-conjugating enzyme E2 variant 1	Ube2v1	8	1	1.273	0.200702	248073	302704	229170	339544	266161	315857
Q8CI94	Glycogen phosphorylase, brain form	Pygb	65	10	1.272	0.478195	1.1194e+06	1.49327e+06	2.07052e+06	1.514e+06	1.93952e+06	1.8991e+06
P61079	Ubiquitin-conjugating enzyme E2 D3	Ube2d3	15	3	1.27	0.0884311	285226	374209	336256	426907	367303	468470
O55100	Synaptogyrin-1	Syngr1	8	2	1.257	0.842467	38349.5	19849.6	381091	25392.4	48195.1	538926
Q01853	Transitional endoplasmic reticulum ATPase	Vcp	6	3	1.256	0.699725	101600	177016	390639	222275	164114	338485
P08228	Superoxide dismutase	Sod1	36	4	1.253	0.771722	1.07311e+06	1.61196e+06	693378	1.59983e+06	1.34422e+06	759619
O88342	WD repeat-containing protein 1	Wdr1	92	9	1.253	0.449514	2.83736e+06	3.99872e+06	2.7274e+06	4.74682e+06	3.5539e+06	2.9275e+06
Q80TL0	Protein phosphatase 1E	Ppm1e	7	2	1.251	0.777684	81001.7	50028	186296	117655	92097	101345
P70404	Isocitrate dehydrogenase	Idh3g	11	3	1.249	0.519203	123674	168822	332030	207718	210847	322945
O35643	AP-1 complex subunit beta-1	Ap1b1	35	3	1.248	0.479803	273063	558095	416505	519914	403156	525812
P48962	ADP/ATP translocase 1	Slc25a4	300	9	1.245	0.0683285	3.2936e+07	4.11241e+07	3.58251e+07	4.84043e+07	4.45961e+07	4.14272e+07
P50247	Adenosylhomocysteinase	Ahcy	9	2	1.243	0.16602	242046	331690	295220	367043	303552	392661
Q9R1T4	Septin-6	Septin6	34	2	1.243	0.265202	284223	423317	354111	440771	372756	440166
P70202	Latexin	Lxn	44	4	1.24	0.722007	4.60151e+06	7.20591e+06	975138	7.30803e+06	5.70392e+06	1.82563e+06
P07724	Albumin	Alb	168	20	1.235	0.551944	1.39911e+07	1.94152e+07	1.15308e+07	1.74732e+07	1.72771e+07	1.44863e+07
Q9WUM5	Succinate--CoA ligase	Suclg1	30	5	1.231	0.340333	224606	474023	398459	493471	406101	490358
P17427	AP-2 complex subunit alpha-2	Ap2a2	65	7	1.229	0.656402	1.6117e+06	2.04312e+06	2.13826e+06	2.51074e+06	1.4054e+06	2.8287e+06
Q99P72	Reticulon-4	Rtn4	1	1	1.227	0.200412	123514	142136	107574	178274	126369	151593
P63001	Ras-related C3 botulinum toxin substrate 1	Rac1	81	3	1.222	0.13331	5.21542e+06	6.46554e+06	4.76903e+06	7.59385e+06	6.37582e+06	6.27661e+06
Q2PFD7	PH and SEC7 domain-containing protein 3	Psd3	4	2	1.222	0.430906	960805	1.43587e+06	593243	1.41094e+06	1.17457e+06	1.05497e+06
Q8BLQ9	Cell adhesion molecule 2	Cadm2	16	4	1.22	0.496313	256887	458397	661487	559207	587299	471151
Q5PR73	GTP-binding protein Di-Ras2	Diras2	2	1	1.219	0.0837722	72485.6	82459.5	96765.5	120783	100499	99524.2
P10833	Ras-related protein R-Ras	Rras	4	1	1.214	0.283264	86924.3	74098.8	102567	143900	85744.3	105539
Q91V61	Sideroflexin-3	Sfxn3	17	3	1.213	0.285721	503842	693484	582593	706774	596987	736685
Q9DBG3	AP-2 complex subunit beta	Ap2b1	86	12	1.213	0.370405	2.31709e+06	3.1935e+06	2.64788e+06	3.21142e+06	2.57207e+06	3.546e+06
P97447	Four and a half LIM domains protein 1	Fhl1	12	3	1.211	0.759118	214741	389597	144583	357742	260034	183564
Q7TQI3	Ubiquitin thioesterase OTUB1	Otub1	27	5	1.21	0.454098	337124	455824	508430	551669	371003	632178
Q9JKP5	Muscleblind-like protein 1	Mbnl1	24	1	1.209	0.172075	5.72226e+09	6.46224e+09	5.45529e+09	7.96183e+09	6.92015e+09	6.01285e+09
P35802	Neuronal membrane glycoprotein M6-a	Gpm6a	48	6	1.2	0.650248	2.58417e+06	3.11963e+06	4.63386e+06	3.74498e+06	2.60575e+06	5.8977e+06
Q9CPU0	Lactoylglutathione lyase	Glo1	14	4	1.197	0.732192	751898	1.26238e+06	524682	900239	907688	405963
P47857	ATP-dependent 6-phosphofructokinase, muscle type	Pfkm	20	3	1.197	0.199384	331834	413316	466936	494616	422866	662287
Q8R191	Synaptogyrin-3	Syngr3	9	2	1.191	0.268196	542215	733076	653428	778200	631401	863270
P49722	Proteasome subunit alpha type-2	Psma2	9	2	1.191	0.941808	90640.9	131252	203279	101014	163567	156314
P68373	Tubulin alpha-1C chain	Tuba1c	589	1	1.19	0.634047	2.35348e+06	3.69603e+06	4.45267e+06	4.48124e+06	2.85123e+06	4.39864e+06
Q9CQ69	Cytochrome b-c1 complex subunit 8	Uqcrq	8	1	1.189	0.228289	127681	177830	196073	211407	171511	266985
Q9JIS5	Synaptic vesicle glycoprotein 2A	Sv2a	55	6	1.188	0.396318	1.35142e+06	1.82627e+06	1.27328e+06	1.79793e+06	1.56568e+06	1.60566e+06
P47911	60S ribosomal protein L6	Rpl6	13	3	1.188	0.684123	380963	484418	370497	465261	374901	452453
Q3UMR5	Calcium uniporter protein, mitochondrial	Mcu	16	4	1.186	0.0853603	273263	311343	295958	411531	322049	350918
P62631	Elongation factor 1-alpha 2	Eef1a2	182	3	1.184	0.274962	2.07105e+06	2.5564e+06	2.00941e+06	2.73304e+06	2.27089e+06	2.45216e+06
P26883	Peptidyl-prolyl cis-trans isomerase FKBP1A	Fkbp1a	8	1	1.184	0.956158	550802	814738	446128	854641	651956	378664
Q9CPY7	Cytosol aminopeptidase	Lap3	11	2	1.182	0.622663	201432	292831	134482	276525	182897	238091
Q9R0P3	S-formylglutathione hydrolase	Esd	5	1	1.181	0.190523	60931.4	110867	91736.1	154126	105092	108376
B2RSH2	Guanine nucleotide-binding protein G(i) subunit alpha-1	Gnai1	15	1	1.181	0.922049	84793.5	87595.7	110315	108900	68977.5	103465
P60335	Poly(rC)-binding protein 1	Pcbp1	27	4	1.181	0.680705	335224	351479	481348	414961	290354	685080
P99024	Tubulin beta-5 chain	Tubb5	912	4	1.178	0.284967	8.00095e+06	1.00701e+07	1.13361e+07	1.1865e+07	9.56975e+06	1.41697e+07
P56135	ATP synthase subunit f, mitochondrial	Atp5mf	10	1	1.178	0.535809	136896	187336	265073	220685	158244	366171
Q8K596	Sodium/calcium exchanger 2	Slc8a2	33	4	1.177	0.530585	193188	373959	339679	399938	257755	402974
Q791V5	Mitochondrial carrier homolog 2	Mtch2	16	5	1.176	0.098706	423276	541071	549271	636287	562252	723170
P60202	Myelin proteolipid protein	Plp1	109	6	1.175	0.573846	1.72591e+07	2.30982e+07	3.02846e+07	3.31765e+07	2.71346e+07	2.00397e+07
P19783	Cytochrome c oxidase subunit 4 isoform 1, mitochondrial	Cox4i1	37	5	1.17	0.550729	556005	846097	640268	835281	642005	749307
P67778	Prohibitin 1	Phb1	6	2	1.17	0.58101	74664.9	96474.5	148641	112853	93591.7	161118
Q571F8	Glutaminase liver isoform, mitochondrial	Gls2	6	1	1.169	0.302116	167722	188395	232931	220249	197858	271673
P63168	Dynein light chain 1, cytoplasmic	Dynll1	21	2	1.169	0.400325	402427	570052	499142	593583	472581	583383
Q5SWU9	Acetyl-CoA carboxylase 1	Acaca	364	37	1.168	0.523241	1.66778e+07	1.76039e+07	1.50962e+07	1.94812e+07	1.99621e+07	1.45384e+07
Q99KB8	Hydroxyacylglutathione hydrolase, mitochondrial	Hagh	1	1	1.168	0.607153	243045	29638.8	38455	47116.1	44906.1	39366.3
P06151	L-lactate dehydrogenase A chain	Ldha	103	9	1.167	0.388525	5.04309e+06	6.43926e+06	5.65939e+06	6.60538e+06	5.38007e+06	7.10265e+06
P14094	Sodium/potassium-transporting ATPase subunit beta-1	Atp1b1	91	8	1.167	0.237729	7.47334e+06	9.58905e+06	1.06732e+07	1.1188e+07	9.39373e+06	1.35836e+07
P61089	Ubiquitin-conjugating enzyme E2 N	Ube2n	16	2	1.164	0.839136	203700	364140	504643	231248	423875	478928
P35278	Ras-related protein Rab-5C	Rab5c	17	1	1.163	0.72145	269752	362266	209212	322209	249359	313797
P38647	Stress-70 protein, mitochondrial	Hspa9	27	4	1.163	0.55949	352172	433832	530850	504540	383083	580449
Q9R0P5	Destrin	Dstn	18	3	1.162	0.117797	270835	403001	408533	468469	435802	613431
Q80YX1	Tenascin	Tnc	5	2	1.162	0.48637	45500.1	45278.8	35678.2	32410.2	97296.3	52626.7
P35803	Neuronal membrane glycoprotein M6-b	Gpm6b	7	1	1.162	0.51219	244424	300666	323121	349368	242833	417784
Q60597	2-oxoglutarate dehydrogenase complex component E1	Ogdh	13	2	1.161	0.957116	89404.2	95605	140819	110973	79333.6	131971
P60904	DnaJ homolog subfamily C member 5	Dnajc5	12	1	1.16	0.326901	357369	447032	299091	536443	368217	414503
P60867	40S ribosomal protein S20	Rps20	9	2	1.158	0.26499	307882	327990	343089	379711	323748	493470
Q9R0Q6	Actin-related protein 2/3 complex subunit 1A	Arpc1a	15	2	1.157	0.246422	504166	658462	575840	793359	584176	666332
P16858	Glyceraldehyde-3-phosphate dehydrogenase	Gapdh	344	13	1.157	0.22592	3.75997e+07	5.20834e+07	4.72593e+07	5.46799e+07	4.66436e+07	6.54842e+07
Q91V12	Cytosolic acyl coenzyme A thioester hydrolase	Acot7	65	7	1.157	0.2492	1.91502e+06	2.80124e+06	2.23297e+06	3.21088e+06	2.58357e+06	2.51673e+06
G5E829	Plasma membrane calcium-transporting ATPase 1	Atp2b1	151	8	1.157	0.187972	2.88901e+06	4.22582e+06	3.99141e+06	4.32047e+06	4.83677e+06	4.61712e+06
Q9CQI6	Coactosin-like protein	Cotl1	55	5	1.156	0.307468	816275	1.6897e+06	1.43836e+06	2.07589e+06	1.6632e+06	1.42767e+06
O35633	Vesicular inhibitory amino acid transporter	Slc32a1	1	1	1.156	0.257883	137373	69618.3	121462	157000	140412	139869
O08709	Peroxiredoxin-6	Prdx6	106	12	1.155	0.460692	2.79226e+06	3.66043e+06	3.07183e+06	3.54931e+06	3.10305e+06	3.59034e+06
Q04447	Creatine kinase B-type	Ckb	157	13	1.155	0.704036	5.7573e+06	7.68486e+06	1.23619e+07	8.87555e+06	7.1652e+06	1.19837e+07
P17932	Putative 60S ribosomal protein L32'	Rpl32-ps	3	1	1.154	0.790987	119419	86786.6	89585.8	115369	65394.8	103422
P48774	Glutathione S-transferase Mu 5	Gstm5	19	4	1.153	0.517242	828792	1.05113e+06	1.37576e+06	1.21247e+06	964586	1.58557e+06
O35405	5'-3' exonuclease PLD3	Pld3	10	1	1.152	0.326519	32518	59751.3	59307.4	68302.3	52148.8	71440.9
Q8CAQ8	MICOS complex subunit Mic60	Immt	21	4	1.151	0.776833	307310	337263	412029	428545	292706	388082
O55143	Sarcoplasmic/endoplasmic reticulum calcium ATPase 2	Atp2a2	28	7	1.149	0.368425	520870	676799	655742	771103	579243	753365
Q9R111	Guanine deaminase	Gda	14	4	1.149	0.586936	304076	295396	342367	349256	242425	610598
P04370	Myelin basic protein	Mbp	27	2	1.147	0.76907	894926	1.69358e+06	2.46979e+06	1.94296e+06	1.94451e+06	1.35355e+06
P63101	14-3-3 protein zeta/delta	Ywhaz	177	11	1.145	0.664865	1.44771e+07	1.76709e+07	1.57979e+07	1.8089e+07	1.36953e+07	1.94009e+07
Q60932	Voltage-dependent anion-selective channel protein 1	Vdac1	142	12	1.144	0.198184	7.19202e+06	1.11078e+07	1.03086e+07	1.17969e+07	1.0333e+07	1.59483e+07
P10630	Eukaryotic initiation factor 4A-II	Eif4a2	14	3	1.142	0.439857	129576	206332	258526	235703	177847	332036
O08553	Dihydropyrimidinase-related protein 2	Dpysl2	290	17	1.141	0.438272	7.73336e+06	1.08095e+07	1.35893e+07	1.23362e+07	1.00057e+07	1.5934e+07
Q99LX0	Parkinson disease protein 7 homolog	Park7	12	3	1.14	0.830903	269349	377503	756163	323548	439575	430520
Q9CZ13	Cytochrome b-c1 complex subunit 1, mitochondrial	Uqcrc1	39	7	1.14	0.977635	596617	730981	1.34657e+06	833104	570527	1.27337e+06
Q8BGT8	Phytanoyl-CoA hydroxylase-interacting protein-like	Phyhipl	28	2	1.139	0.366043	473187	496234	491694	560268	454438	662219
Q7TSJ2	Microtubule-associated protein 6	Map6	4	2	1.138	0.15444	57800.1	79097.5	68630.3	77661.8	78131.8	104641
Q8K1M6	Dynamin-1-like protein	Dnm1l	4	1	1.138	0.910021	68476.5	68635.7	127586	78133.5	69937.2	120825
P60764	Ras-related C3 botulinum toxin substrate 3	Rac3	37	1	1.137	0.780448	71196.3	77797.6	67708.3	60380.7	80976.9	85349
Q8VEM8	Phosphate carrier protein, mitochondrial	Slc25a3	49	4	1.136	0.456639	971509	1.35629e+06	1.92228e+06	1.54102e+06	1.4235e+06	2.05018e+06
P52760	2-iminobutanoate/2-iminopropanoate deaminase	Rida	11	3	1.136	0.947119	560771	832782	132979	778348	636967	104668
P40142	Transketolase	Tkt	54	8	1.136	0.464704	2.08887e+06	2.74704e+06	1.36575e+06	3.0326e+06	2.37256e+06	1.96631e+06
Q9CQR4	Acyl-coenzyme A thioesterase 13	Acot13	15	2	1.134	0.260477	554901	802433	705916	843345	767344	800274
P15105	Glutamine synthetase	Glul	115	10	1.132	0.205708	4.44227e+06	6.118e+06	6.08031e+06	6.88393e+06	5.82054e+06	7.50184e+06
P51174	Long-chain specific acyl-CoA dehydrogenase, mitochondrial	Acadl	4	1	1.132	0.348011	70908.8	62179.7	67151.1	75992.2	63343.6	81336
Q61316	Heat shock 70 kDa protein 4	Hspa4	15	5	1.131	0.662836	372322	485109	588251	571447	426360	548490
O70340	Neuronal pentraxin-2	Nptx2	10	2	1.131	0.388006	80799.5	98358.9	40154.3	74524.8	91352.8	117425
P63318	Protein kinase C gamma type	Prkcg	72	11	1.128	0.633958	911748	1.14088e+06	1.57582e+06	1.28645e+06	1.04072e+06	1.70255e+06
P63085	Mitogen-activated protein kinase 1	Mapk1	35	3	1.127	0.587365	399867	464287	747584	464639	523045	961231
P39053	Dynamin-1	Dnm1	198	18	1.125	0.545905	6.32943e+06	7.80522e+06	9.7341e+06	8.78447e+06	6.9424e+06	1.15486e+07
P56480	ATP synthase subunit beta, mitochondrial	Atp5f1b	155	15	1.125	0.701648	4.0778e+06	5.77393e+06	4.54676e+06	5.33299e+06	4.53467e+06	5.11471e+06
P56564	Excitatory amino acid transporter 1	Slc1a3	77	7	1.124	0.336318	7.96998e+06	1.01809e+07	8.60995e+06	1.10186e+07	8.93746e+06	9.68085e+06
P20357	Microtubule-associated protein 2	Map2	47	9	1.123	0.701215	1.05293e+06	1.1998e+06	1.11533e+06	1.25244e+06	905782	1.52372e+06
Q9D1A0	Peroxiredoxin-like 2C	Prxl2c	6	1	1.123	0.260483	1.85633e+06	1.91696e+06	1.74007e+06	2.2144e+06	2.084e+06	1.79372e+06
P68368	Tubulin alpha-4A chain	Tuba4a	584	5	1.121	0.871081	3.96993e+06	5.47342e+06	7.76931e+06	6.13351e+06	4.64564e+06	6.66266e+06
Q62277	Synaptophysin	Syp	29	3	1.119	0.45862	3.23197e+06	3.88639e+06	3.68026e+06	4.11831e+06	3.22806e+06	4.87912e+06
Q61598	Rab GDP dissociation inhibitor beta	Gdi2	62	4	1.116	0.421359	342112	610523	659396	681537	503954	784518
Q9Z0E0	Neurochondrin	Ncdn	84	10	1.116	0.930009	1.20779e+06	1.57623e+06	2.75949e+06	1.75936e+06	1.14885e+06	2.87528e+06
Q91WS0	CDGSH iron-sulfur domain-containing protein 1	Cisd1	17	2	1.116	0.292998	357434	438381	317984	398766	388247	579854
P27600	Guanine nucleotide-binding protein subunit alpha-12	Gna12	17	1	1.116	0.367257	1.43456e+06	1.78801e+06	1.68444e+06	1.87908e+06	1.52849e+06	2.33524e+06
P51863	V-type proton ATPase subunit d 1	Atp6v0d1	17	3	1.114	0.98303	511931	713972	983472	795081	359743	1.22204e+06
Q62108	Disks large homolog 4	Dlg4	75	10	1.113	0.402056	829442	1.23793e+06	1.18835e+06	1.32318e+06	1.04557e+06	1.36405e+06
Q9D6R2	Isocitrate dehydrogenase	Idh3a	27	5	1.112	0.884573	757667	950065	1.42715e+06	1.05685e+06	754481	1.4572e+06
P97315	Cysteine and glycine-rich protein 1	Csrp1	13	2	1.112	0.985011	248786	595717	102710	392438	276711	145262
P61294	Ras-related protein Rab-6B	Rab6b	13	4	1.111	0.733008	647235	972093	819244	910589	669596	1.02183e+06
Q99KI0	Aconitate hydratase, mitochondrial	Aco2	182	19	1.11	0.140166	3.12803e+07	3.94735e+07	3.81692e+07	4.98505e+07	4.23618e+07	3.91106e+07
Q9DCT2	NADH dehydrogenase	Ndufs3	4	2	1.107	0.698867	183546	178188	111627	197225	99482.8	292553
O08749	Dihydrolipoyl dehydrogenase, mitochondrial	Dld	30	4	1.106	0.846466	372847	452237	559821	500298	391373	529044
Q11011	Puromycin-sensitive aminopeptidase	Npepps	18	5	1.105	0.825472	169234	248245	307451	274355	188255	292764
P16125	L-lactate dehydrogenase B chain	Ldhb	123	10	1.105	0.481023	8.5703e+06	1.1064e+07	1.02205e+07	1.15407e+07	9.38894e+06	1.12912e+07
Q8C0E2	Vacuolar protein sorting-associated protein 26B	Vps26b	14	2	1.103	0.212504	376752	553817	554985	657750	610920	570948
P46096	Synaptotagmin-1	Syt1	127	15	1.103	0.13412	4.63477e+06	6.36727e+06	6.23601e+06	6.87721e+06	6.58176e+06	8.62606e+06
Q61753	D-3-phosphoglycerate dehydrogenase	Phgdh	12	3	1.102	0.486568	45622.3	42909.5	35956.9	32110.4	47275.8	153627
P14824	Annexin A6	Anxa6	2	1	1.102	0.863674	39600.5	62922.4	115740	56117.7	69314.7	89796.4
P62717	60S ribosomal protein L18a	Rpl18a	4	1	1.1	0.181696	104332	116030	100602	114802	123706	111388
P14115	60S ribosomal protein L27a	Rpl27a	5	2	1.098	0.550559	84955.3	105256	150110	115593	105594	169090
Q8BFR5	Elongation factor Tu, mitochondrial	Tufm	28	5	1.097	0.593896	532968	725145	864412	795553	628249	912698
Q8BMF4	Dihydrolipoyllysine-residue acetyltransferase component of pyruvate dehydrogenase complex, mitochondrial	Dlat	80	11	1.097	0.326001	2.79639e+06	3.83948e+06	3.19759e+06	4.10822e+06	3.4525e+06	3.50802e+06
P32037	Solute carrier family 2, facilitated glucose transporter member 3	Slc2a3	27	4	1.097	0.229511	1.49126e+06	1.55007e+06	1.12015e+06	1.64123e+06	1.63531e+06	1.63134e+06
P51410	60S ribosomal protein L9	Rpl9	6	2	1.096	0.322203	133280	159123	141275	154858	143462	180292
P62806	Histone H4	H4c1	42	5	1.096	0.570763	2.56272e+06	3.50687e+06	2.53576e+06	2.80783e+06	2.66992e+06	4.28633e+06
Q60668	Heterogeneous nuclear ribonucleoprotein D0	Hnrnpd	11	1	1.095	0.650358	110704	141074	162708	154497	113240	192492
Q8BRV5	Uncharacterized protein KIAA1671	Kiaa1671	6	1	1.094	0.628767	4.26225e+06	4.59984e+06	4.6729e+06	5.46641e+06	3.94361e+06	5.03382e+06
Q9ES97	Reticulon-3	Rtn3	11	1	1.094	0.448674	312301	389537	564769	421078	426005	704901
Q9D6M3	Mitochondrial glutamate carrier 1	Slc25a22	59	6	1.092	0.563871	2.89231e+06	3.96438e+06	2.42127e+06	3.89542e+06	3.08987e+06	3.15896e+06
Q6PIC6	Sodium/potassium-transporting ATPase subunit alpha-3	Atp1a3	642	25	1.091	0.436329	3.94427e+07	5.39559e+07	6.15197e+07	5.88708e+07	5.06447e+07	6.58721e+07
P09411	Phosphoglycerate kinase 1	Pgk1	85	9	1.09	0.666856	3.9609e+06	5.02646e+06	5.55658e+06	5.47995e+06	4.0689e+06	6.20896e+06
Q9CWF2	Tubulin beta-2B chain	Tubb2b	1014	1	1.09	0.359507	757126	985026	958532	1.04443e+06	848616	1.24747e+06
P62835	Ras-related protein Rap-1A	Rap1a	29	3	1.089	0.388453	739165	1.18404e+06	1.00791e+06	1.24437e+06	1.09809e+06	1.02362e+06
Q7TQD2	Tubulin polymerization-promoting protein	Tppp	35	3	1.089	0.566762	1.11952e+06	1.69665e+06	1.46595e+06	1.61696e+06	1.59631e+06	1.39374e+06
Q64436	Potassium-transporting ATPase alpha chain 1	Atp4a	89	2	1.088	0.761371	550113	807647	1.07977e+06	878912	699279	970736
P47757	F-actin-capping protein subunit beta	Capzb	36	5	1.088	0.392955	1.50964e+06	1.79215e+06	1.47991e+06	2.01435e+06	1.64189e+06	1.59389e+06
P00493	Hypoxanthine-guanine phosphoribosyltransferase	Hprt1	33	7	1.085	0.781175	1.15805e+06	1.59475e+06	516314	1.62343e+06	1.25649e+06	682492
P18872	Guanine nucleotide-binding protein G(o) subunit alpha	Gnao1	138	12	1.085	0.491082	8.13083e+06	1.05132e+07	9.88985e+06	1.07286e+07	8.59158e+06	1.24213e+07
O08599	Syntaxin-binding protein 1	Stxbp1	148	15	1.084	0.551525	4.59064e+06	5.57494e+06	6.52334e+06	6.04529e+06	4.85592e+06	8.10756e+06
Q9QYC0	Alpha-adducin	Add1	35	5	1.084	0.397949	627083	920181	887332	961721	756964	1.14118e+06
Q9D8N0	Elongation factor 1-gamma	Eef1g	11	3	1.082	0.627035	244671	301247	254136	275031	230727	386285
Q9QYG0	Protein NDRG2	Ndrg2	6	2	1.082	0.825097	230046	331275	487139	358446	285820	433166
Q61171	Peroxiredoxin-2	Prdx2	194	11	1.08	0.621328	2.23783e+07	2.96907e+07	1.87427e+07	2.93879e+07	2.261e+07	2.41582e+07
Q91XM9	Disks large homolog 2	Dlg2	10	3	1.078	0.426095	174603	273562	237772	277564	256357	237855
Q8VDN2	Sodium/potassium-transporting ATPase subunit alpha-1	Atp1a1	364	10	1.077	0.153506	1.72467e+06	2.39565e+06	2.42691e+06	2.50508e+06	2.58083e+06	3.41705e+06
O70423	Membrane primary amine oxidase	Aoc3	2	2	1.075	0.528456	35000.4	63988.8	29681.6	25401.4	39208.8	37621.4
Q9QYR6	Microtubule-associated protein 1A	Map1a	34	4	1.074	0.534833	320159	475690	597372	510922	461979	584852
Q9R0K7	Plasma membrane calcium-transporting ATPase 2	Atp2b2	68	4	1.074	0.477948	159758	238720	220944	237224	201973	245523
P97427	Dihydropyrimidinase-related protein 1	Crmp1	126	8	1.073	0.447152	1.50404e+06	2.23711e+06	2.30349e+06	2.39957e+06	1.75219e+06	3.30097e+06
P63017	Heat shock cognate 71 kDa protein	Hspa8	227	21	1.073	0.612844	1.17089e+07	1.70345e+07	1.54933e+07	1.66182e+07	1.35788e+07	1.71217e+07
Q9CQV8	14-3-3 protein beta/alpha	Ywhab	90	3	1.071	0.91342	778479	1.0226e+06	1.01573e+06	1.08811e+06	707341	1.11658e+06
Q68FL4	Putative adenosylhomocysteinase 3	Ahcyl2	8	1	1.071	0.839733	345201	511019	338052	349758	418653	369709
P11798	Calcium/calmodulin-dependent protein kinase type II subunit alpha	Camk2a	193	12	1.071	0.764088	1.1046e+07	1.48818e+07	2.1925e+07	1.59363e+07	1.32796e+07	2.15775e+07
P35486	Pyruvate dehydrogenase E1 component subunit alpha, somatic form, mitochondrial	Pdha1	256	20	1.071	0.498905	1.2565e+07	1.70681e+07	1.36225e+07	1.82098e+07	1.43678e+07	1.45834e+07
P50516	V-type proton ATPase catalytic subunit A	Atp6v1a	93	15	1.07	0.533784	2.66124e+06	4.47891e+06	4.87757e+06	4.79288e+06	3.84551e+06	4.88233e+06
P63328	Protein phosphatase 3 catalytic subunit alpha	Ppp3ca	121	13	1.067	0.485423	5.2963e+06	7.84119e+06	6.41711e+06	8.07138e+06	6.55807e+06	6.8447e+06
Q91V41	Ras-related protein Rab-14	Rab14	14	3	1.065	0.716111	460343	773291	582370	707296	574927	620471
P46460	Vesicle-fusing ATPase	Nsf	219	24	1.065	0.772788	5.03264e+06	6.69361e+06	9.1301e+06	7.12963e+06	5.67742e+06	9.36111e+06
P18760	Cofilin-1	Cfl1	47	5	1.065	0.910993	2.22992e+06	2.73638e+06	2.53673e+06	2.7009e+06	2.14334e+06	2.77296e+06
P00405	Cytochrome c oxidase subunit 2	Mtco2	59	3	1.062	0.93109	1.11872e+06	1.6329e+06	3.59029e+06	1.73427e+06	1.11596e+06	2.99485e+06
Q5SQX6	Cytoplasmic FMR1-interacting protein 2	Cyfip2	20	5	1.061	0.957038	218281	262743	473798	278898	232424	441575
Q9Z2Q6	Septin-5	Septin5	2	2	1.061	0.477695	39675.2	71633.8	81222.4	76002.9	55892.3	107811
P0DP27	Calmodulin-2	Calm2	16	2	1.061	0.59339	495167	416339	269300	523730	441631	69390.3
P05063	Fructose-bisphosphate aldolase C	Aldoc	105	10	1.06	0.642112	1.17127e+06	1.67636e+06	2.47541e+06	1.77746e+06	1.58296e+06	2.56902e+06
Q9CZU6	Citrate synthase, mitochondrial	Cs	28	4	1.06	0.792196	461944	613899	1.08031e+06	650795	564906	1.09324e+06
P11627	Neural cell adhesion molecule L1	L1cam	1	1	1.058	0.857336	4.80886e+06	7.45399e+06	4.69477e+06	7.57021e+06	5.08591e+06	4.91627e+06
Q3TXX4	Vesicular glutamate transporter 1	Slc17a7	43	6	1.057	0.859231	2.33715e+06	2.87988e+06	2.23431e+06	2.7945e+06	2.47105e+06	2.30124e+06
Q9CVB6	Actin-related protein 2/3 complex subunit 2	Arpc2	36	6	1.057	0.43838	739146	1.05438e+06	1.2321e+06	1.11429e+06	963047	1.49874e+06
P14148	60S ribosomal protein L7	Rpl7	14	3	1.057	0.837948	420493	360812	365150	385811	287868	453105
Q7TMM9	Tubulin beta-2A chain	Tubb2a	1033	1	1.056	0.576534	9.9591e+07	1.29434e+08	1.31391e+08	1.36651e+08	1.05341e+08	1.52475e+08
O35874	Neutral amino acid transporter A	Slc1a4	17	2	1.055	0.569452	144743	164973	142788	159584	152764	108432
P17751	Triosephosphate isomerase	Tpi1	129	12	1.055	0.873415	6.34993e+06	1.03138e+07	6.8329e+06	1.09024e+07	6.37312e+06	7.21066e+06
P58252	Elongation factor 2	Eef2	47	8	1.055	0.856947	545550	655335	1.0319e+06	691503	615547	995010
Q8BH59	Electrogenic aspartate/glutamate antiporter SLC25A12, mitochondrial	Slc25a12	40	11	1.052	0.665825	622924	767818	1.21993e+06	807987	758098	1.40686e+06
P62264	40S ribosomal protein S14	Rps14	8	1	1.052	0.943952	111850	128549	128923	143778	92153.3	135195
P16330	2',3'-cyclic-nucleotide 3'-phosphodiesterase	Cnp	263	24	1.052	0.551246	1.11894e+07	1.6477e+07	1.89842e+07	2.34476e+07	1.73272e+07	1.339e+07
P61161	Actin-related protein 2	Actr2	4	1	1.049	0.914009	58223.3	83636	131495	87712.9	66855.3	120801
P15532	Nucleoside diphosphate kinase A	Nme1	70	2	1.047	0.789804	3.28144e+06	4.24531e+06	2.3984e+06	4.17132e+06	3.43601e+06	2.77567e+06
O54774	AP-3 complex subunit delta-1	Ap3d1	5	1	1.044	0.958239	69649.9	39143.4	48856.5	50999	39545.6	63686.6
P68372	Tubulin beta-4B chain	Tubb4b	887	1	1.042	0.760962	4.9802e+06	6.1415e+06	7.84326e+06	6.39864e+06	5.8371e+06	7.45417e+06
P31324	cAMP-dependent protein kinase type II-beta regulatory subunit	Prkar2b	29	5	1.041	0.94817	1.107e+06	1.19725e+06	717312	1.15918e+06	677509	1.15194e+06
P62259	14-3-3 protein epsilon	Ywhae	99	8	1.04	0.61018	765176	1.08793e+06	1.18963e+06	1.13168e+06	864446	1.39385e+06
Q9D051	Pyruvate dehydrogenase E1 component subunit beta, mitochondrial	Pdhb	60	8	1.04	0.510765	1.15741e+06	1.43166e+06	1.59673e+06	1.48865e+06	1.26427e+06	2.03293e+06
P63325	40S ribosomal protein S10	Rps10	1	1	1.04	0.745783	97198.7	125002	94797.6	187237	101066	81192.3
P61264	Syntaxin-1B	Stx1b	36	6	1.04	0.667748	1.18415e+06	1.49345e+06	1.14025e+06	1.41023e+06	951094	1.23109e+06
P62746	Rho-related GTP-binding protein RhoB	Rhob	29	2	1.039	0.870499	439317	584280	482605	501567	473377	548588
Q9D6F9	Tubulin beta-4A chain	Tubb4a	820	5	1.039	0.74287	1.81996e+06	2.79842e+06	3.41265e+06	2.90729e+06	2.28188e+06	3.29854e+06
P14152	Malate dehydrogenase, cytoplasmic	Mdh1	109	9	1.039	0.648908	3.76336e+06	5.00932e+06	5.31613e+06	5.20267e+06	4.07396e+06	5.92518e+06
Q9CPW4	Actin-related protein 2/3 complex subunit 5	Arpc5	36	4	1.038	0.432391	3.30933e+06	4.83159e+06	3.27782e+06	3.43433e+06	3.67054e+06	2.76162e+06
P61750	ADP-ribosylation factor 4	Arf4	65	2	1.036	0.941559	199302	287666	221274	287551	199509	229170
Q9DB77	Cytochrome b-c1 complex subunit 2, mitochondrial	Uqcrc2	12	4	1.034	0.752435	377636	490892	819700	503573	507459	784956
P10853	Histone H2B type 1-F/J/L	H2bc7	30	3	1.034	0.960489	2.76063e+06	3.12909e+06	2.35552e+06	2.85351e+06	2.31549e+06	3.02387e+06
P62245	40S ribosomal protein S15a	Rps15a	9	2	1.032	0.554671	197580	308860	272068	280897	278520	280928
Q9DBJ1	Phosphoglycerate mutase 1	Pgam1	103	10	1.032	0.913391	2.26505e+06	3.45983e+06	4.04807e+06	3.57008e+06	2.50838e+06	3.82123e+06
Q61553	Fascin	Fscn1	71	10	1.031	0.354069	2.01454e+06	2.04317e+06	1.46233e+06	2.07606e+06	1.84572e+06	2.40258e+06
P53986	Monocarboxylate transporter 1	Slc16a1	6	1	1.03	0.830446	83641.7	110534	117358	119304	113811	69432.2
P52480	Pyruvate kinase PKM	Pkm	236	24	1.028	0.465034	1.14142e+07	1.37042e+07	1.61228e+07	1.3617e+07	1.40936e+07	1.8286e+07
Q91V14	Solute carrier family 12 member 5	Slc12a5	29	4	1.027	0.241334	403029	632256	637870	625265	649186	869405
Q05920	Pyruvate carboxylase, mitochondrial	Pc	1463	55	1.027	0.926496	2.79463e+08	2.78823e+08	3.62602e+08	2.86926e+08	2.86089e+08	3.55905e+08
Q920N2	Biotin--protein ligase	Hlcs	3	1	1.025	0.703554	100181	64370.9	52363.5	66006	75349.5	51494
P14211	Calreticulin	Calr	22	4	1.025	0.918353	191231	292573	247916	254156	207663	276138
Q9R0P9	Ubiquitin carboxyl-terminal hydrolase isozyme L1	Uchl1	61	5	1.022	0.613562	2.14351e+06	3.05001e+06	2.90946e+06	2.97442e+06	2.42713e+06	3.34308e+06
Q8K0T0	Reticulon-1	Rtn1	19	1	1.022	0.559413	308177	392595	503624	401126	336302	834811
P53994	Ras-related protein Rab-2A	Rab2a	47	4	1.02	0.535228	1.02548e+06	1.43751e+06	1.56756e+06	1.72578e+06	1.46659e+06	1.26265e+06
P68369	Tubulin alpha-1A chain	Tuba1a	656	1	1.02	0.736195	7.62219e+07	1.04168e+08	1.02453e+08	1.04463e+08	7.89604e+07	1.16568e+08
Q62425	Cytochrome c oxidase subunit NDUFA4	Ndufa4	17	2	1.02	0.99684	1.20353e+06	1.73396e+06	1.4065e+06	1.7641e+06	1.15794e+06	1.43397e+06
P19157	Glutathione S-transferase P 1	Gstp1	6	2	1.019	0.863734	306303	396050	511691	403691	336252	417222
P09671	Superoxide dismutase	Sod2	23	4	1.017	0.641232	692542	995500	351388	979547	704522	594499
P20108	Thioredoxin-dependent peroxide reductase, mitochondrial	Prdx3	64	7	1.017	0.949205	3.75284e+06	4.82511e+06	2.71082e+06	5.10258e+06	3.81599e+06	2.65381e+06
Q7TMF3	NADH dehydrogenase	Ndufa12	4	1	1.016	0.83856	90631	115093	105953	111706	107608	97048.4
O35098	Dihydropyrimidinase-related protein 4	Dpysl4	3	2	1.015	0.784244	115105	97699.5	215382	116824	115876	241777
Q9CR68	Cytochrome b-c1 complex subunit Rieske, mitochondrial	Uqcrfs1	31	3	1.011	0.970854	618098	700986	724134	715371	614107	708457
P07901	Heat shock protein HSP 90-alpha	Hsp90aa1	124	8	1.01	0.907636	1.72066e+06	2.12212e+06	2.5914e+06	2.14342e+06	1.60863e+06	2.56678e+06
P46660	Alpha-internexin	Ina	108	11	1.01	0.686503	1.05126e+06	1.82339e+06	2.27453e+06	2.21618e+06	1.84082e+06	1.50436e+06
P60766	Cell division control protein 42 homolog	Cdc42	22	6	1.008	0.570316	488481	832984	351784	500918	492225	339167
O55131	Septin-7	Septin7	21	6	1.006	0.659912	365480	460443	478542	463334	348997	679135
P62897	Cytochrome c, somatic	Cycs	11	1	1.005	0.45334	920429	1.02431e+06	979952	984701	954266	1.25216e+06
Q9DC70	NADH dehydrogenase	Ndufs7	2	1	1.003	0.570261	190500	179800	173493	180296	176756	208648
Q9CQQ7	ATP synthase F(0) complex subunit B1, mitochondrial	Atp5pb	10	3	1.002	0.781939	576843	757703	893470	759049	661350	893313
P10126	Elongation factor 1-alpha 1	Eef1a1	196	5	1.001	0.505948	2.04836e+07	2.38605e+07	1.88428e+07	2.14664e+07	1.66304e+07	2.0507e+07
Q03265	ATP synthase subunit alpha, mitochondrial	Atp5f1a	243	22	1	0.666985	1.23544e+07	1.89155e+07	2.13758e+07	1.89184e+07	1.45023e+07	2.50419e+07
P63082	V-type proton ATPase 16 kDa proteolipid subunit c	Atp6v0c	21	1	1	0.614293	988361	928501	917264	928638	871496	974161
Q9JJV2	Profilin-2	Pfn2	28	3	0.999	0.75844	337131	563760	520854	520260	392704	591192
Q8K183	Pyridoxal kinase	Pdxk	9	2	0.998	0.998905	277324	457462	158606	276822	185137	391967
P08553	Neurofilament medium polypeptide	Nefm	148	15	0.998	0.853816	2.89903e+06	5.20904e+06	6.10624e+06	7.26574e+06	5.19776e+06	2.99104e+06
Q02053	Ubiquitin-like modifier-activating enzyme 1	Uba1	14	5	0.997	0.901725	319641	436377	885672	435060	382108	868612
Q9JM76	Actin-related protein 2/3 complex subunit 3	Arpc3	18	2	0.997	0.614068	87923.8	105240	102197	117223	91825.6	101880
P17710	Hexokinase-1	Hk1	149	21	0.997	0.805094	2.77305e+06	4.31289e+06	6.3965e+06	4.29914e+06	3.56222e+06	6.3166e+06
P62880	Guanine nucleotide-binding protein G(I)/G(S)/G(T) subunit beta-2	Gnb2	75	4	0.995	0.573269	756859	1.03769e+06	1.10526e+06	1.03289e+06	826905	1.50138e+06
Q6PIE5	Sodium/potassium-transporting ATPase subunit alpha-2	Atp1a2	454	15	0.995	0.670814	3.39171e+06	4.47828e+06	4.85518e+06	4.45681e+06	3.93687e+06	5.03391e+06
Q8BG39	Synaptic vesicle glycoprotein 2B	Sv2b	31	4	0.995	0.924651	1.127e+06	1.26734e+06	918567	1.22064e+06	991619	1.12152e+06
Q9QUI0	Transforming protein RhoA	Rhoa	31	3	0.994	0.376155	581024	783357	492404	577832	360699	577716
P11438	Lysosome-associated membrane glycoprotein 1	Lamp1	1	1	0.994	0.632847	101847	119839	185891	124740	119105	112851
Q80TJ1	Calcium-dependent secretion activator 1	Cadps	14	4	0.993	0.62593	316898	400822	462066	397989	396960	451323
Q8BG51	Mitochondrial Rho GTPase 1	Rhot1	1	1	0.991	0.654124	35188.6	34715.9	36830	34876.9	34195.2	41725.4
P10649	Glutathione S-transferase Mu 1	Gstm1	19	3	0.989	0.954453	423622	569900	848224	563499	470565	809403
Q99MR8	Methylcrotonoyl-CoA carboxylase subunit alpha, mitochondrial	Mccc1	545	38	0.989	0.532071	5.21145e+07	5.27863e+07	3.88584e+07	5.44004e+07	5.15213e+07	4.8008e+07
P70195	Proteasome subunit beta type-7	Psmb7	7	1	0.988	0.907178	92291.9	145849	123721	122232	154599	94757.3
Q76MZ3	Serine/threonine-protein phosphatase 2A 65 kDa regulatory subunit A alpha isoform	Ppp2r1a	22	6	0.987	0.963705	231471	297280	1.09479e+06	293294	191337	1.20617e+06
P68510	14-3-3 protein eta	Ywhah	80	4	0.986	0.900785	935079	1.20793e+06	1.49662e+06	1.19099e+06	1.00606e+06	1.51621e+06
P62814	V-type proton ATPase subunit B, brain isoform	Atp6v1b2	50	10	0.986	0.949413	896857	1.20088e+06	2.0829e+06	1.18401e+06	996085	2.03269e+06
Q62188	Dihydropyrimidinase-related protein 3	Dpysl3	108	5	0.985	0.97569	547017	868487	977902	855250	465460	1.20551e+06
Q921F2	TAR DNA-binding protein 43	Tardbp	25	3	0.984	0.826288	681861	888879	470800	905820	670823	553666
P61027	Ras-related protein Rab-10	Rab10	35	3	0.983	0.612024	860117	1.20715e+06	983308	966859	1.11555e+06	726073
Q9R1Q8	Transgelin-3	Tagln3	1	1	0.979	0.91062	43659.3	61891	86258	60570.3	51271.6	69333
P14873	Microtubule-associated protein 1B	Map1b	9	1	0.977	0.82699	46238	71885.1	83745.1	70214.4	39987.2	81433.9
Q91ZA3	Propionyl-CoA carboxylase alpha chain, mitochondrial	Pcca	1592	48	0.974	0.870449	3.70494e+08	3.70582e+08	3.00595e+08	3.60931e+08	3.64628e+08	2.98362e+08
Q91XV3	Brain acid soluble protein 1	Basp1	25	5	0.972	0.596373	1.22879e+06	1.93867e+06	1.10561e+06	1.44618e+06	1.19499e+06	1.08333e+06
O08756	3-hydroxyacyl-CoA dehydrogenase type-2	Hsd17b10	3	1	0.972	0.573169	101948	142583	143338	118792	138604	166532
Q9R1P4	Proteasome subunit alpha type-1	Psma1	6	1	0.97	0.32499	145770	168870	140939	145991	141370	135406
P24369	Peptidyl-prolyl cis-trans isomerase B	Ppib	28	4	0.969	0.9843	528041	1.07974e+06	691719	670208	600886	963752
P63323	40S ribosomal protein S12	Rps12	4	1	0.968	0.725094	85893.3	87902.8	93775.2	85124.1	77065	98638.7
Q8CFC7	CLK4-associating serine/arginine rich protein	Clasrp	1	1	0.967	0.462327	161529	31417.4	43041	29003.9	41639.5	45988.7
Q9ERD7	Tubulin beta-3 chain	Tubb3	600	8	0.967	0.811215	3.71327e+06	4.64291e+06	6.33384e+06	4.07594e+06	4.49053e+06	7.12415e+06
Q68FD5	Clathrin heavy chain 1	Cltc	403	50	0.967	0.724244	9.45358e+06	1.34413e+07	1.63941e+07	1.29989e+07	1.13656e+07	1.79067e+07
P84099	60S ribosomal protein L19	Rpl19	2	1	0.966	0.267498	121863	130057	123346	119110	97767.3	122123
Q9Z2H5	Band 4.1-like protein 1	Epb41l1	4	2	0.966	0.554428	155042	170136	100583	205924	129750	149703
Q9JKC6	Cell cycle exit and neuronal differentiation protein 1	Cend1	2	1	0.965	0.920361	126577	192243	161187	182789	131343	155496
Q61699	Heat shock protein 105 kDa	Hsph1	4	1	0.962	0.533835	104213	119060	140147	114564	78574.5	132940
P63005	Platelet-activating factor acetylhydrolase IB subunit beta	Pafah1b1	12	2	0.962	0.546302	338173	286313	251958	308608	222977	275385
Q9Z140	Copine-6	Cpne6	17	2	0.96	0.631064	361471	491579	494948	472083	278551	481421
Q99JY0	Trifunctional enzyme subunit beta, mitochondrial	Hadhb	10	2	0.958	0.43409	122226	306834	300738	354109	288235	269026
P68040	Receptor of activated protein C kinase 1	Rack1	64	9	0.958	0.928648	1.32174e+06	1.88516e+06	2.07944e+06	1.80551e+06	1.91548e+06	1.56579e+06
P47754	F-actin-capping protein subunit alpha-2	Capza2	56	4	0.958	0.646382	924630	1.15161e+06	1.06989e+06	1.02469e+06	949638	1.04963e+06
Q61792	LIM and SH3 domain protein 1	Lasp1	34	4	0.955	0.828973	580428	765744	464026	729878	554461	442305
Q14BI2	Metabotropic glutamate receptor 2	Grm2	2	1	0.953	0.780607	63442.8	24544.1	38290	28583.7	83690	36480.1
Q8VIJ6	Splicing factor, proline- and glutamine-rich	Sfpq	3	1	0.953	0.789961	94451	122581	144274	116766	101280	125169
P08551	Neurofilament light polypeptide	Nefl	45	6	0.952	0.611283	252545	501466	654881	656225	477162	449162
E9Q912	Rap1 GTPase-GDP dissociation stimulator 1	Rap1gds1	2	1	0.95	0.603174	45699.3	60909.6	99544.4	30591	57847.8	83387.6
Q9EST1	Gasdermin-A	Gsdma	6	3	0.948	0.415375	123448	111273	605641	116976	136160	97481.6
D3Z7P3	Glutaminase kidney isoform, mitochondrial	Gls	37	6	0.947	0.833942	703754	974482	1.17094e+06	922626	876393	1.11291e+06
P70414	Sodium/calcium exchanger 1	Slc8a1	17	2	0.947	0.521033	125034	181945	173339	195971	164072	163512
Q9R1P3	Proteasome subunit beta type-2	Psmb2	11	1	0.946	0.881058	79217.5	124479	117481	132033	111164	86365.8
Q9DBP5	UMP-CMP kinase	Cmpk1	8	1	0.945	0.490658	94896	121175	206289	114476	121903	94692
Q9CX86	Heterogeneous nuclear ribonucleoprotein A0	Hnrnpa0	14	2	0.944	0.517245	450286	564340	314813	425197	521233	120418
Q9Z1G3	V-type proton ATPase subunit C 1	Atp6v1c1	18	3	0.944	0.677032	829515	895248	647597	1.11564e+06	783220	695515
P62874	Guanine nucleotide-binding protein G(I)/G(S)/G(T) subunit beta-1	Gnb1	75	5	0.944	0.470015	3.4075e+06	5.04142e+06	5.28773e+06	4.75964e+06	4.39575e+06	7.01296e+06
P12382	ATP-dependent 6-phosphofructokinase, liver type	Pfkl	38	5	0.943	0.904627	416233	644982	738102	608422	443281	676482
P34884	Macrophage migration inhibitory factor	Mif	105	4	0.941	0.897646	2.1339e+07	2.69448e+07	6.61535e+06	2.55835e+07	2.0076e+07	5.7001e+06
Q9D0M3	Cytochrome c1, heme protein, mitochondrial	Cyc1	21	4	0.941	0.874613	448280	544430	809861	512044	444729	769221
O89053	Coronin-1A	Coro1a	21	4	0.939	0.962981	404316	551030	865689	428196	517498	912230
Q3UNH4	G protein-regulated inducer of neurite outgrowth 1	Gprin1	4	1	0.938	0.699317	54958.6	91260.2	69005.3	64706.4	58393.3	74376.5
O55023	Inositol monophosphatase 1	Impa1	7	3	0.936	0.499483	138764	209387	177330	53001.2	206006	165959
Q9DC69	NADH dehydrogenase	Ndufa9	12	3	0.935	0.63993	134906	183999	221183	172099	165667	263721
Q9R1S8	Calpain-7	Capn7	4	1	0.935	0.756408	459967	497301	445103	564473	430094	365543
Q8K0S0	Phytanoyl-CoA hydroxylase-interacting protein	Phyhip	26	1	0.934	0.950148	72263.9	121313	105409	102864	88243	98442.3
P70349	Adenosine 5'-monophosphoramidase HINT1	Hint1	12	1	0.931	0.940232	132010	212848	273305	198079	149411	243895
Q8R016	Bleomycin hydrolase	Blmh	4	3	0.93	0.638028	84837.3	119654	326405	111278	139877	108786
P47963	60S ribosomal protein L13	Rpl13	7	1	0.93	0.334635	114758	127911	141890	127137	83815.2	118950
P61982	14-3-3 protein gamma	Ywhag	117	6	0.929	0.889327	3.20146e+06	3.78645e+06	4.13275e+06	3.51763e+06	2.78414e+06	4.7327e+06
Q9DCZ4	MICOS complex subunit Mic26	Apoo	12	1	0.927	0.525748	172567	317611	209984	229120	167201	194756
P27659	60S ribosomal protein L3	Rpl3	3	1	0.923	0.472465	128116	120134	107348	110907	105668	120734
P50518	V-type proton ATPase subunit E 1	Atp6v1e1	26	2	0.922	0.805075	448751	564207	737977	520444	447931	688868
P28652	Calcium/calmodulin-dependent protein kinase type II subunit beta	Camk2b	92	4	0.921	0.914677	568764	845441	1.58424e+06	778459	760760	1.45952e+06
P63038	60 kDa heat shock protein, mitochondrial	Hspd1	26	5	0.921	0.508413	567933	531385	874558	470275	522898	698684
Q62059	Versican core protein	Vcan	4	2	0.92	0.957729	38700.4	54615.2	27119.8	35596.6	49765.7	31028.7
P56391	Cytochrome c oxidase subunit 6B1	Cox6b1	6	2	0.916	0.830647	202038	240027	140999	285700	185134	152688
P62821	Ras-related protein Rab-1A	Rab1A	30	2	0.916	0.759022	245680	435917	337681	363428	266134	309290
P16546	Spectrin alpha chain, non-erythrocytic 1	Sptan1	174	38	0.916	0.998926	3.75623e+06	5.79263e+06	7.05666e+06	5.30509e+06	4.47358e+06	6.4757e+06
Q9Z0P4	Paralemmin-1	Palm	5	1	0.915	0.737137	74690.1	118791	90992	104643	83289.1	77643.9
Q8BVI4	Dihydropteridine reductase	Qdpr	14	3	0.915	0.943325	272475	462852	617760	396624	423607	491835
Q6ZWN5	40S ribosomal protein S9	Rps9	5	1	0.915	0.820232	123193	32771.6	57453.1	52556.1	46012.7	140082
P43277	Histone H1.3	H1-3	41	2	0.914	0.869489	2.08649e+06	2.42556e+06	1.69975e+06	2.58841e+06	1.907e+06	1.58803e+06
P31938	Dual specificity mitogen-activated protein kinase kinase 1	Map2k1	21	2	0.912	0.945026	160094	204463	254016	186525	156834	271383
Q9Z130	Heterogeneous nuclear ribonucleoprotein D-like	Hnrnpdl	9	1	0.912	0.521635	197411	266591	238863	217867	137875	263466
O54983	Ketimine reductase mu-crystallin	Crym	49	7	0.911	0.841554	1.20701e+06	1.56801e+06	2.18098e+06	1.42854e+06	1.1048e+06	2.20724e+06
Q8K0U4	Heat shock 70 kDa protein 12A	Hspa12a	28	6	0.908	0.70241	455072	639111	699972	534314	580317	827067
C0HKE3	Histone H2A type 1-D	H2ac7	29	3	0.906	0.61683	2.42931e+06	3.51758e+06	2.94272e+06	3.06481e+06	2.5116e+06	2.66685e+06
P11499	Heat shock protein HSP 90-beta	Hsp90ab1	165	10	0.905	0.634394	4.63838e+06	5.68659e+06	6.07813e+06	5.1477e+06	3.94927e+06	6.19704e+06
P99029	Peroxiredoxin-5, mitochondrial	Prdx5	33	4	0.905	0.874293	345380	565993	561877	508592	414947	573456
P05202	Aspartate aminotransferase, mitochondrial	Got2	268	19	0.903	0.558192	2.14179e+07	2.35523e+07	7.40064e+06	2.62848e+07	1.9347e+07	1.6295e+07
Q61644	Protein kinase C and casein kinase substrate in neurons protein 1	Pacsin1	22	3	0.903	0.683567	419889	560152	833789	505801	434605	654186
P84086	Complexin-2	Cplx2	10	2	0.902	0.616357	85556.9	157309	120565	96673.9	108694	112685
Q61548	Clathrin coat assembly protein AP180	Snap91	1	1	0.901	0.998884	71950	105379	173606	94980.5	82111.9	168521
Q9JHU4	Cytoplasmic dynein 1 heavy chain 1	Dync1h1	10	6	0.899	0.894771	160635	199735	317072	179291	179526	359851
P30275	Creatine kinase U-type, mitochondrial	Ckmt1	19	4	0.898	0.802734	572400	791170	908380	628045	710462	811923
P84075	Neuron-specific calcium-binding protein hippocalcin	Hpca	25	4	0.897	0.893106	666469	946024	822161	1.03502e+06	737070	628920
Q01768	Nucleoside diphosphate kinase B	Nme2	69	1	0.891	0.944071	188308	239278	114483	249899	167845	114664
Q8BG05	Heterogeneous nuclear ribonucleoprotein A3	Hnrnpa3	16	3	0.891	0.69122	227503	344036	521955	230082	306625	398912
Q9Z2I9	Succinate--CoA ligase	Sucla2	9	4	0.89	0.886451	478082	863644	835049	743498	523284	796548
P20029	Endoplasmic reticulum chaperone BiP	Hspa5	47	7	0.889	0.80489	327135	473597	553977	383312	420982	464082
P35979	60S ribosomal protein L12	Rpl12	12	2	0.887	0.38387	369498	286073	356534	339004	209783	316143
Q05816	Fatty acid-binding protein 5	Fabp5	12	1	0.881	0.418278	500836	849929	708896	629284	624430	459992
Q62261	Spectrin beta chain, non-erythrocytic 1	Sptbn1	56	17	0.88	0.728403	1.2144e+06	1.61085e+06	2.79138e+06	1.41719e+06	1.33398e+06	2.09522e+06
P02088	Hemoglobin subunit beta-1	Hbb-b1	86	8	0.874	0.242593	6.41072e+06	8.62117e+06	6.46806e+06	5.65426e+06	5.6544e+06	6.8426e+06
Q9DCX2	ATP synthase subunit d, mitochondrial	Atp5pd	32	5	0.873	0.63839	380088	598305	738697	522603	392426	575685
Q9D819	Inorganic pyrophosphatase	Ppa1	1	1	0.873	0.812026	24380.6	29124.3	53780.3	24092.9	25413.5	48543.6
P50396	Rab GDP dissociation inhibitor alpha	Gdi1	98	7	0.871	0.901147	3.12215e+06	4.35695e+06	4.59431e+06	3.79621e+06	3.21187e+06	5.55635e+06
P48758	Carbonyl reductase	Cbr1	9	1	0.871	0.854994	112396	212789	187849	163559	141143	223911
Q61885	Myelin-oligodendrocyte glycoprotein	Mog	18	3	0.865	0.381174	2.97232e+06	4.90347e+06	4.12069e+06	3.56605e+06	3.90706e+06	2.04265e+06
O55142	60S ribosomal protein L35a	Rpl35a	9	1	0.864	0.581582	166087	159341	131333	170778	137720	115862
Q3UHL1	CaM kinase-like vesicle-associated protein	Camkv	7	4	0.859	0.78533	42865.4	58285.8	147561	50042.7	45289.9	108333
P11276	Fibronectin	Fn1	11	3	0.853	0.970021	277782	253309	348408	236959	206284	484327
P62082	40S ribosomal protein S7	Rps7	2	1	0.85	0.594019	207122	95580.5	78609.4	189163	81250.1	38831.5
P61358	60S ribosomal protein L27	Rpl27	13	2	0.849	0.329205	128187	133546	156670	39593.6	136554	113328
Q9EQF6	Dihydropyrimidinase-related protein 5	Dpysl5	42	5	0.848	0.900009	614280	744982	971939	631888	554110	1.14302e+06
P61255	60S ribosomal protein L26	Rpl26	13	3	0.844	0.626663	354115	335288	290590	373716	283004	270151
Q9Z1G4	V-type proton ATPase 116 kDa subunit a 1	Atp6v0a1	84	11	0.84	0.844139	3.77579e+06	8.27683e+06	1.12263e+07	6.949e+06	8.19671e+06	4.88663e+06
P62908	40S ribosomal protein S3	Rps3	28	3	0.838	0.731409	373741	616057	532551	535110	446478	426030
P62761	Visinin-like protein 1	Vsnl1	20	3	0.837	0.549085	304315	358036	348159	376626	279260	291268
P17426	AP-2 complex subunit alpha-1	Ap2a1	77	6	0.835	0.792719	628479	817633	832446	682505	556638	961947
Q9Z2U1	Proteasome subunit alpha type-5	Psma5	1	1	0.835	0.239421	128648	159105	197374	149527	132803	97415.3
P48678	Prelamin-A/C	Lmna	4	1	0.829	0.313996	41451.8	54284.3	75869.2	47633.3	45023.9	39629.5
Q9QXS1	Plectin	Plec	2	1	0.829	0.847458	230422	325326	646471	269800	569187	246183
P05201	Aspartate aminotransferase, cytoplasmic	Got1	156	15	0.825	0.898977	7.31413e+06	8.1788e+06	3.2844e+06	9.13337e+06	6.03213e+06	4.1407e+06
Q9DB20	ATP synthase subunit O, mitochondrial	Atp5po	15	3	0.821	0.926391	268212	322024	599617	264327	256486	678220
Q6Q477	Plasma membrane calcium-transporting ATPase 4	Atp2b4	81	2	0.82	0.947914	140450	152527	95085	115167	83179.7	199781
Q9D358	Low molecular weight phosphotyrosine protein phosphatase	Acp1	2	1	0.82	0.742051	89350.5	159388	135216	162945	110810	80324.5
P17809	Solute carrier family 2, facilitated glucose transporter member 1	Slc2a1	9	2	0.818	0.583407	459107	461564	402878	516941	375569	343084
P68254	14-3-3 protein theta	Ywhaq	80	4	0.815	0.258496	650916	825867	797950	593965	650216	747784
Q9CQN1	Heat shock protein 75 kDa, mitochondrial	Trap1	22	2	0.814	0.726894	934128	1.14283e+06	1.4761e+06	872613	930350	1.5157e+06
Q8K021	Secretory carrier-associated membrane protein 1	Scamp1	6	2	0.811	0.656269	171795	116777	249253	139331	78108.5	254410
P62137	Serine/threonine-protein phosphatase PP1-alpha catalytic subunit	Ppp1ca	17	3	0.81	0.804653	710393	792350	323848	710476	575687	334676
P35980	60S ribosomal protein L18	Rpl18	9	2	0.809	0.325437	436797	445823	395071	450539	251898	353202
G3X9C2	F-box only protein 50	Nccrp1	2	1	0.808	0.651374	29234.8	40975	54817.8	33126.4	53064.5	24412.6
Q9Z1N5	Spliceosome RNA helicase Ddx39b	Ddx39b	10	3	0.804	0.896178	62915.5	102770	132517	214955	82608.7	58323.9
Q08189	Protein-glutamine gamma-glutamyltransferase E	Tgm3	9	2	0.803	0.781287	137376	408261	696248	327686	341455	219288
Q61176	Arginase-1	Arg1	14	3	0.801	0.870507	460948	818842	1.05756e+06	655887	875402	601559
P70296	Phosphatidylethanolamine-binding protein 1	Pebp1	9	3	0.799	0.465812	462921	589959	1.37302e+06	471108	351754	826309
Q8VDQ8	NAD-dependent protein deacetylase sirtuin-2	Sirt2	10	4	0.794	0.634708	197561	770759	858898	947704	611646	509885
P27773	Protein disulfide-isomerase A3	Pdia3	3	1	0.789	0.290238	63053.7	85734.3	104379	59858.3	67631.6	74451.2
Q9CWZ7	Gamma-soluble NSF attachment protein	Napg	2	1	0.783	0.60058	61161.3	86512.9	147507	66860.5	67756.7	103366
Q9CYT6	Adenylyl cyclase-associated protein 2	Cap2	2	2	0.782	0.68738	69981.1	198589	180811	141409	133349	217917
Q91VR2	ATP synthase subunit gamma, mitochondrial	Atp5f1c	8	3	0.776	0.614093	250427	308623	455920	239551	214766	432588
P97351	40S ribosomal protein S3a	Rps3a	1	1	0.773	0.44336	76786.9	29717.8	37974.3	29341.7	26256.8	46963.9
P26040	Ezrin	Ezr	1	1	0.769	0.788601	72352.2	138119	126074	80728.6	96898.2	130188
Q7TSF1	Desmoglein-1-beta	Dsg1b	6	3	0.768	0.303783	281006	342080	328841	252440	316519	122895
Q3ULJ0	Glycerol-3-phosphate dehydrogenase 1-like protein	Gpd1l	2	2	0.762	0.0687374	42138.3	42293	59800.8	35681.1	30285.8	32243.2
Q61656	Probable ATP-dependent RNA helicase DDX5	Ddx5	9	3	0.76	0.249354	393982	395467	422701	423399	295513	300437
P28661	Septin-4	Septin4	11	1	0.749	0.902377	143276	224873	335561	168375	150276	368918
P62852	40S ribosomal protein S25	Rps25	1	1	0.747	0.00696836	72374.7	76763.9	68043	60045	53516.3	54046
P17182	Alpha-enolase	Eno1	121	10	0.744	0.399923	8.94423e+06	1.13381e+07	1.08385e+07	1.17099e+07	7.132e+06	8.06608e+06
Q9Z2U0	Proteasome subunit alpha type-7	Psma7	12	3	0.738	0.697113	148418	281312	347086	242405	207699	203187
P97855	Ras GTPase-activating protein-binding protein 1	G3bp1	4	1	0.714	0.456559	116454	51658.7	32776	61646.7	36900.6	29071.8
Q9QUM9	Proteasome subunit alpha type-6	Psma6	4	1	0.71	0.369497	99991.5	159824	183726	127480	113435	107560
P09405	Nucleolin	Ncl	12	1	0.706	0.227726	152718	208860	232246	190214	147378	106275
E9Q557	Desmoplakin	Dsp	72	18	0.703	0.528096	2.35836e+06	3.31539e+06	5.41371e+06	2.3309e+06	4.11806e+06	2.32831e+06
Q8VCM7	Fibrinogen gamma chain	Fgg	96	11	0.703	0.650966	4.63727e+06	4.26091e+06	4.90415e+06	2.51156e+06	3.25837e+06	7.17761e+06
P56959	RNA-binding protein FUS	Fus	8	1	0.702	0.252566	231418	308112	192539	244937	162557	154828
P62267	40S ribosomal protein S23	Rps23	10	2	0.701	0.0136436	63225.2	52153.9	49792.8	38825.6	36556.8	33415.9
P17183	Gamma-enolase	Eno2	122	8	0.695	0.754377	3.42417e+06	3.38029e+06	2.07207e+06	3.65879e+06	2.34832e+06	2.21763e+06
Q9D172	Glutamine amidotransferase-like class 1 domain-containing protein 3, mitochondrial	Gatd3	7	3	0.692	0.138104	501158	630717	443474	491070	347012	346923
P62862	40S ribosomal protein S30	Fau	5	1	0.692	0.373044	1.38293e+06	737321	629725	1.03328e+06	510023	390771
P12970	60S ribosomal protein L7a	Rpl7a	4	1	0.682	0.117125	198197	274916	237414	215227	136995	161850
P47738	Aldehyde dehydrogenase, mitochondrial	Aldh2	2	1	0.68	0.158008	53925.3	68374.4	88318.4	45490.9	46527.3	61221.3
P11031	Activated RNA polymerase II transcriptional coactivator p15	Sub1	7	1	0.672	0.320156	238782	201065	170974	230689	135208	107391
P80313	T-complex protein 1 subunit eta	Cct7	7	2	0.672	0.739996	129654	157596	211045	105975	104910	266829
P06801	NADP-dependent malic enzyme	Me1	4	1	0.67	0.40078	29659.8	52554.7	74691.2	40160.9	35018.1	35196.2
Q8R001	Microtubule-associated protein RP/EB family member 2	Mapre2	1	1	0.664	0.964167	51989.4	58713.8	69787.3	38997.8	33352.8	152105
Q9CPR4	60S ribosomal protein L17	Rpl17	5	1	0.663	0.383158	989251	86554.8	114575	71861.2	138049	75958.2
P62855	40S ribosomal protein S26	Rps26	5	1	0.659	0.158613	230057	195636	161598	188133	120503	128982
Q62420	Endophilin-A1	Sh3gl2	8	3	0.643	0.342473	66776.9	101277	161914	37388.3	65112.6	116320
Q9CY58	Plasminogen activator inhibitor 1 RNA-binding protein	Serbp1	11	2	0.641	0.347088	192470	244339	156837	235232	79099.8	123330
P07356	Annexin A2	Anxa2	49	9	0.616	0.547696	853456	1.73875e+06	1.93221e+06	1.07106e+06	1.696e+06	817185
P80315	T-complex protein 1 subunit delta	Cct4	1	1	0.615	0.355397	206454	37304.5	86844.4	32019.9	65275.4	53383.5
P62918	60S ribosomal protein L8	Rpl8	10	1	0.613	0.0252242	217175	202278	242019	162181	113250	133112
P35762	CD81 antigen	Cd81	10	2	0.605	0.546482	46037.9	134748	294496	89944.2	81455	77986.6
P35991	Tyrosine-protein kinase BTK	Btk	26	7	0.604	0.204513	1.91001e+06	1.48662e+06	1.02699e+06	1.376e+06	897965	692627
P03995	Glial fibrillary acidic protein	Gfap	134	5	0.575	0.572079	2.76249e+07	6.82884e+07	6.35769e+07	3.65264e+07	5.73596e+07	2.98414e+07
O88569	Heterogeneous nuclear ribonucleoproteins A2/B1	Hnrnpa2b1	11	4	0.573	0.0900222	683976	936560	933980	745162	484138	535405
Q02257	Junction plakoglobin	Jup	66	10	0.567	0.472081	1.35039e+06	2.38076e+06	2.41032e+06	1.35083e+06	2.40434e+06	1.20488e+06
Q8QZT1	Acetyl-CoA acetyltransferase, mitochondrial	Acat1	65	12	0.559	0.29145	2.63122e+06	4.91474e+06	5.16129e+06	4.16417e+06	1.44849e+06	2.74857e+06
P57780	Alpha-actinin-4	Actn4	2	2	0.546	0.564362	210722	544447	590985	297470	413904	273518
Q7TSG5	SH3 domain-containing protein 21	Sh3d21	3	1	0.546	0.396445	169968	136385	67645.6	124168	74479.2	62871.6
Q9WTL4	Insulin receptor-related protein	Insrr	7	1	0.542	0.182597	202395	338437	108239	126426	109743	25666.3
Q9CZW5	Mitochondrial import receptor subunit TOM70	Tomm70	1	1	0.542	0.266613	411850	881564	1.03343e+06	477646	648571	286821
Q9QXS6	Drebrin	Dbn1	2	1	0.533	0.175067	60311.1	41797.2	104171	32157.7	17544.8	55583.4
Q7SIG6	Arf-GAP with SH3 domain, ANK repeat and PH domain-containing protein 2	Asap2	28	1	0.532	0.45842	5.48203e+07	1.30459e+08	1.25144e+08	6.65971e+07	1.12593e+08	4.67731e+07
Q8C8R3	Ankyrin-2	Ank2	6	2	0.489	0.571504	46949.2	58924.2	68228.3	28821.4	17249	118356
Q8VEK3	Heterogeneous nuclear ribonucleoprotein U	Hnrnpu	3	1	0.464	0.490223	89213.3	52660.7	157632	21097.7	41388.4	168035
Q9CXW4	60S ribosomal protein L11	Rpl11	14	2	0.455	0.593349	954683	780856	196472	355174	605422	250759
Q6ZWV7	60S ribosomal protein L35	Rpl35	14	2	0.444	0.117115	572048	612206	417602	477830	254075	250589
P14602	Heat shock protein beta-1	Hspb1	2	1	0.42	0.190801	37192.6	81560.7	219027	22049.6	34282.5	48104
O09061	Proteasome subunit beta type-1	Psmb1	11	2	0.4	0.0126144	132570	160281	181866	55911	64068.6	90685.5
Q9WV02	RNA-binding motif protein, X chromosome	Rbmx	1	1	0.389	0.403767	134164	119950	72358.5	159474	46630.1	35603.6
Q61990	Poly(rC)-binding protein 2	Pcbp2	25	2	0.364	0.334443	154807	174878	175402	63638.2	19942.9	243222
O35737	Heterogeneous nuclear ribonucleoprotein H	Hnrnph1	14	3	0.358	0.13635	564411	289454	158093	216024	80340	103637
P62900	60S ribosomal protein L31	Rpl31	9	2	0.34	0.100225	189357	140817	96747.8	102817	47933	29714.9
Q7TNC4	Putative RNA-binding protein Luc7-like 2	Luc7l2	2	1	0.297	0.183629	345296	121915	40095.5	63870.6	19386.8	36149.9
Q61838	Pregnancy zone protein	Pzp	2	1	0.295	0.00706031	55869.8	70295	84964.1	32990.2	20712.1	20528.3
Q62189	U1 small nuclear ribonucleoprotein A	Snrpa	3	1	0.279	0.0231277	175711	116723	205018	78825.7	49019.3	33249.4
P61514	60S ribosomal protein L37a	Rpl37a	5	1	0.254	0.0870339	672615	223538	122290	109379	56762.8	43435.2
P20152	Vimentin	Vim	19	1	0.232	0.0477702	791178	383500	243377	208358	69054.6	89012.2
P62751	60S ribosomal protein L23a	Rpl23a	54	5	0.218	0.10582	8.72973e+06	3.39555e+06	1.47893e+06	1.86042e+06	738574	554561
P62830	60S ribosomal protein L23	Rpl23	8	1	0.2	0.081097	422202	239531	173034	32265.8	47905.4	162227
Q9CQF3	Cleavage and polyadenylation specificity factor subunit 5	Nudt21	8	3	0.195	0.00813325	162026	386280	294888	34932.9	57368.4	60901.1
P25444	40S ribosomal protein S2	Rps2	2	1	0.18	0.0892351	443812	136503	39622.8	24593.9	10259.9	25586.4
Q8BK67	Protein RCC2	Rcc2	4	1	0.169	0.238298	463723	209874	23794.3	16241	35543	51308.8
