# Supplementary material for: Optochemical profiling of receptor-proximal proteins in vivo in minutes
Source: Research Square preprint supplement (doi:10.21203/rs.3.rs-3418321/v1), 2023-11-14
Supplement: Supplementary file 7 [file cb31e2a8b016df000deb64b2.xlsx]

## Sheet: Legend
Supplementary Table 3
Proteomics data on the dependency of PhoxID labeling on photoirradiation intensity & duration (n=1 biological replicate x 2 technical replicates)
Sheet name	Description
S3-1	1 min, 0.16 W/cm^2; hit proteins only
S3-2	10 min, 0.16 W/cm^2; hit proteins only
S3-3	1 min, 2.4 W/cm^2; hit proteins only
S3-4	10 min, 2.4 W/cm^2; hit proteins only
S3-5	1 min, 0.16 W/cm^2; all detected proteins
S3-6	10 min, 0.16 W/cm^2; all detected proteins
S3-7	1 min, 2.4 W/cm^2; all detected proteins
S3-8	10 min, 2.4 W/cm^2; all detected proteins

## Sheet: S3-1. 1 min 0.16 W-cm2, hits
UniProt ID	Protein	Gene	# PSMs	# unique peptides	Fold change: Light (+) vs. Light(–)	Abundances (Grouped): Light(–)	Abundances (Grouped): Light (+)
Q60625	Intercellular adhesion molecule 5	Icam5	16	5	7.81	125251	978245
B9EKR1	Receptor-type tyrosine-protein phosphatase zeta	Ptprz1	6	1	7.104	26152.4	185796
P23819	Glutamate receptor 2	Gria2	12	5	6.647	185218	1.23116e+06
Q9Z218	Dipeptidyl aminopeptidase-like protein 6	Dpp6	4	3	5.952	100816	600095
P23818	Glutamate receptor 1	Gria1	12	3	5.891	88107.5	519012
Q9Z2W9	Glutamate receptor 3	Gria3	9	4	5.133	117353	602384
Q8VCM7	Fibrinogen gamma chain	Fgg	58	14	4.293	2.80473e+06	1.20421e+07

## Sheet: S3-2. 10 min 0.16 W-cm2, hits
UniProt ID	Protein	Gene	# PSMs	# unique peptides	Fold change: Light (+) vs. (–)	Abundances (Grouped): Light(–)	Abundances (Grouped): Light(+)
Q810U4	Neuronal cell adhesion molecule	Nrcam	2	2	10.508	11572.9	121610
B9EKR1	Receptor-type tyrosine-protein phosphatase zeta	Ptprz1	6	1	9.307	20883.3	194364
P97350	Plakophilin-1	Pkp1	7	4	7.547	35675.7	269242
Q9D1T0	Leucine-rich repeat and immunoglobulin-like domain-containing nogo receptor-interacting protein 1	Lingo1	2	2	6.308	33269.8	209852
P23818	Glutamate receptor 1	Gria1	18	7	6.067	220060	1.33507e+06
Q60625	Intercellular adhesion molecule 5	Icam5	24	10	5.814	208946	1.2148e+06
Q9Z2W9	Glutamate receptor 3	Gria3	14	5	5.38	106520	573114
Q8BYI9	Tenascin-R	Tnr	28	14	4.954	518067	2.56671e+06
P23819	Glutamate receptor 2	Gria2	16	7	4.789	175178	838947
O88343	Electrogenic sodium bicarbonate cotransporter 1	Slc4a4	1	1	4.674	10877.1	50843.1
P55066	Neurocan core protein	Ncan	5	3	4.17	43665.2	182097
O88998	Noelin	Olfm1	1	1	3.456	55451.8	191669
P15116	Cadherin-2	Cdh2	1	1	3.453	25893.4	89416.9
Q62059	Versican core protein	Vcan	2	1	3.218	36240.6	116615
O70554	Small proline-rich protein 2B	Sprr2b	1	1	3.055	7611.63	23255.3
Q05793	Basement membrane-specific heparan sulfate proteoglycan core protein	Hspg2	3	2	2.987	39075.9	116727
Q8BLQ9	Cell adhesion molecule 2	Cadm2	2	1	2.714	60078.5	163040
Q9Z218	Dipeptidyl aminopeptidase-like protein 6	Dpp6	3	2	2.655	72154.1	191568
Q810U3	Neurofascin	Nfasc	10	6	2.577	151954	391524
P17809	Solute carrier family 2, facilitated glucose transporter member 1	Slc2a1	2	1	2.526	43942.8	111005
P10852	4F2 cell-surface antigen heavy chain	Slc3a2	5	4	2.518	67262.5	169387
Q8VCM7	Fibrinogen gamma chain	Fgg	42	13	2.49	2.23597e+06	5.56789e+06
Q8BLK3	Limbic system-associated membrane protein	Lsamp	2	1	2.172	20526.4	44584.5
P12960	Contactin-1	Cntn1	60	21	2.118	2.21302e+06	4.68662e+06
P01831	Thy-1 membrane glycoprotein	Thy1	10	2	2	481848	963457
E9Q557	Desmoplakin	Dsp	58	23	1.985	3.13225e+06	6.21707e+06
P10493	Nidogen-1	Nid1	2	2	1.956	120458	235661
Q9JIA1	Leucine-rich glioma-inactivated protein 1	Lgi1	4	2	1.953	90784.8	177286
P06837	Neuromodulin	Gap43	3	1	1.946	169194	329211
Q8R366	Immunoglobulin superfamily member 8	Igsf8	4	4	1.786	29484.4	52652.8
Q8VHW2	Voltage-dependent calcium channel gamma-8 subunit	Cacng8	8	2	1.777	105735	187893
P14231	Sodium/potassium-transporting ATPase subunit beta-2	Atp1b2	8	2	1.737	317047	550655

## Sheet: S3-3. 1 min 2.4 W-cm2, hits
UniProt ID	Protein	Gene	# PSMs	# unique peptides	Fold change: Light (+) vs. (–)	Abundances (Grouped): Light (–)	Abundances (Grouped): Light (+)
B9EKR1	Receptor-type tyrosine-protein phosphatase zeta	Ptprz1	7	2	22.045	19446.1	428689
P10493	Nidogen-1	Nid1	9	6	15.644	150251	2.3505e+06
Q9Z218	Dipeptidyl aminopeptidase-like protein 6	Dpp6	8	5	14.847	92755	1.37713e+06
Q9Z2W9	Glutamate receptor 3	Gria3	28	10	14.803	178734	2.64576e+06
Q60625	Intercellular adhesion molecule 5	Icam5	26	10	14.547	213899	3.11167e+06
Q69ZK9	Neuroligin-2	Nlgn2	4	1	13.803	5403.2	74578.4
P35438	Glutamate receptor ionotropic, NMDA 1	Grin1	4	3	13.401	82703.7	1.10835e+06
Q810U4	Neuronal cell adhesion molecule	Nrcam	10	6	10.595	134295	1.4228e+06
Q8BYI9	Tenascin-R	Tnr	45	21	10.432	631154	6.58445e+06
P23818	Glutamate receptor 1	Gria1	19	8	10.233	154356	1.57948e+06
P23819	Glutamate receptor 2	Gria2	25	11	10.189	400665	4.08257e+06
O35136	Neural cell adhesion molecule 2	Ncam2	5	4	10.141	73027.7	740579
Q9D1T0	Leucine-rich repeat and immunoglobulin-like domain-containing nogo receptor-interacting protein 1	Lingo1	7	3	9.761	69466.4	678040
P04925	Major prion protein	Prnp	2	1	8.516	7155.29	60937
Q8R366	Immunoglobulin superfamily member 8	Igsf8	11	4	8.42	52173.2	439316
Q61885	Myelin-oligodendrocyte glycoprotein	Mog	5	2	7.827	48696.7	381154
O88998	Noelin	Olfm1	2	1	7.709	45294.7	349182
Q810U3	Neurofascin	Nfasc	23	13	7.216	256467	1.85076e+06
Q05793	Basement membrane-specific heparan sulfate proteoglycan core protein	Hspg2	12	8	6.96	49393	343776
P10852	4F2 cell-surface antigen heavy chain	Slc3a2	9	6	6.831	90702.6	619627
Q9QUP5	Hyaluronan and proteoglycan link protein 1	Hapln1	5	3	6.778	91382.3	619433
P55066	Neurocan core protein	Ncan	6	4	6.181	47159.6	291505
Q9QYS2	Metabotropic glutamate receptor 3	Grm3	1	1	6.081	8658.14	52648.8
Q8BLK3	Limbic system-associated membrane protein	Lsamp	9	4	6.038	187286	1.13084e+06
O88507	Ciliary neurotrophic factor receptor subunit alpha	Cntfr	3	1	5.921	15858.9	93903.1
Q62059	Versican core protein	Vcan	5	3	5.852	59580.2	348651
Q8BYM5	Neuroligin-3	Nlgn3	9	4	5.256	22806.2	119861
Q8VHW2	Voltage-dependent calcium channel gamma-8 subunit	Cacng8	11	3	5.235	107086	560646
O54991	Contactin-associated protein 1	Cntnap1	2	2	5.21	15167.4	79016.7
P17897	Lysozyme C-1	Lyz1	7	1	5.072	193895	983423
P12960	Contactin-1	Cntn1	82	28	5.006	2.25923e+06	1.13098e+07
P02468	Laminin subunit gamma-1	Lamc1	2	1	4.862	19982.1	97159.7
Q8R464	Cell adhesion molecule 4	Cadm4	9	5	4.687	89624.8	420048
P07724	Albumin	Alb	60	20	4.656	1.94879e+06	9.07267e+06
Q63912	Oligodendrocyte-myelin glycoprotein	Omg	3	2	4.579	47312.4	216649
Q61292	Laminin subunit beta-2	Lamb2	22	13	4.508	186542	840890
Q9JIA1	Leucine-rich glioma-inactivated protein 1	Lgi1	6	2	4.447	75302.1	334904
P01831	Thy-1 membrane glycoprotein	Thy1	11	3	4.421	424244	1.87553e+06
P14231	Sodium/potassium-transporting ATPase subunit beta-2	Atp1b2	10	2	4.174	258973	1.08092e+06
Q9QZF2	Glypican-1	Gpc1	2	2	4.152	35816.8	148712
P20917	Myelin-associated glycoprotein	Mag	9	5	4.099	115314	472630
Q8BMF4	Dihydrolipoyllysine-residue acetyltransferase component of pyruvate dehydrogenase complex, mitochondrial	Dlat	17	5	4.042	605646	2.44821e+06
P31650	Sodium- and chloride-dependent GABA transporter 3	Slc6a11	4	1	4.001	54063.6	216286
Q9CPW0	Contactin-associated protein-like 2	Cntnap2	11	7	3.939	106706	420310
Q8K377	Leucine-rich repeat transmembrane neuronal protein 1	Lrrtm1	2	1	3.801	16326.3	62055.3
O88343	Electrogenic sodium bicarbonate cotransporter 1	Slc4a4	4	2	3.782	53025	200540
Q9R1V6	Disintegrin and metalloproteinase domain-containing protein 22	Adam22	2	1	3.706	20105.4	74509.7
A2ASQ1	Agrin	Agrn	2	2	3.679	36523.8	134368
Q3TXX4	Vesicular glutamate transporter 1	Slc17a7	6	2	3.642	148565	541073
P97797	Tyrosine-protein phosphatase non-receptor type substrate 1	Sirpa	4	4	3.631	140061	508493
P06837	Neuromodulin	Gap43	4	1	3.538	138203	488908
P13595	Neural cell adhesion molecule 1	Ncam1	35	12	3.419	1.04241e+06	3.56383e+06
Q80UG2	Plexin-A4	Plxna4	1	1	3.36	18960.1	63710.9
P02463	Collagen alpha-1(IV) chain	Col4a1	3	2	3.334	14965.1	49888
Q99PJ0	Neurotrimin	Ntm	1	1	2.97	19521.8	57979.1
Q99N28	Cell adhesion molecule 3	Cadm3	14	4	2.905	180410	524167
Q05816	Fatty acid-binding protein 5	Fabp5	3	1	2.778	79982.8	222200
P02088	Hemoglobin subunit beta-1	Hbb-b1	26	7	2.769	1.7512e+06	4.84913e+06
Q9JIS5	Synaptic vesicle glycoprotein 2A	Sv2a	4	2	2.766	14102.6	39001.9
Q8BGN3	Glycerophosphocholine cholinephosphodiesterase ENPP6	Enpp6	2	1	2.72	27234.7	74085.7
Q6NXK7	Inactive dipeptidyl peptidase 10	Dpp10	4	3	2.71	37104.9	100538
Q68ED2	Metabotropic glutamate receptor 7	Grm7	2	1	2.701	16680.4	45048.4

## Sheet: S3-4. 10 min 2.4 W-cm2, hits
UniProt ID	Protein	Gene	# PSMs	# unique peptides	Fold change: Light (+) vs. (–)	Abundances (Grouped): Light(–)	Abundances (Grouped): Light(+)
Q9D2P8	Myelin-associated oligodendrocyte basic protein	Mobp	6	1	32.561	28838.1	938993
Q60625	Intercellular adhesion molecule 5	Icam5	58	18	28.011	504635	1.41354e+07
Q8BYI9	Tenascin-R	Tnr	97	31	24.366	1.18246e+06	2.88113e+07
B9EKR1	Receptor-type tyrosine-protein phosphatase zeta	Ptprz1	18	7	19.1	133228	2.54467e+06
Q9D1T0	Leucine-rich repeat and immunoglobulin-like domain-containing nogo receptor-interacting protein 1	Lingo1	21	7	16.857	139372	2.34939e+06
Q68FM6	Protein phosphatase 1 regulatory subunit 29	Elfn2	5	3	16.608	32070.2	532613
P23819	Glutamate receptor 2	Gria2	62	24	14.82	829185	1.22885e+07
Q9Z2W9	Glutamate receptor 3	Gria3	52	15	14.673	473729	6.95118e+06
P23818	Glutamate receptor 1	Gria1	76	23	14.526	633076	9.19629e+06
Q810U4	Neuronal cell adhesion molecule	Nrcam	37	17	14.474	367297	5.31609e+06
Q9Z218	Dipeptidyl aminopeptidase-like protein 6	Dpp6	42	17	14.012	419187	5.87377e+06
O35136	Neural cell adhesion molecule 2	Ncam2	12	6	13.481	127088	1.7133e+06
Q9CPW0	Contactin-associated protein-like 2	Cntnap2	22	13	13.393	116804	1.56435e+06
Q8K377	Leucine-rich repeat transmembrane neuronal protein 1	Lrrtm1	4	2	13	16684.7	216909
Q810U3	Neurofascin	Nfasc	52	21	12.628	589843	7.4483e+06
P11627	Neural cell adhesion molecule L1	L1cam	12	6	12.291	48274.1	593346
P35438	Glutamate receptor ionotropic, NMDA 1	Grin1	19	8	11.478	236140	2.71045e+06
O54991	Contactin-associated protein 1	Cntnap1	17	9	11.358	129385	1.46959e+06
Q9QUP5	Hyaluronan and proteoglycan link protein 1	Hapln1	17	8	11.252	354234	3.98594e+06
Q69ZK9	Neuroligin-2	Nlgn2	12	5	11.155	29211	325856
Q8BYM5	Neuroligin-3	Nlgn3	16	6	10.439	146404	1.52832e+06
Q8BGN3	Glycerophosphocholine cholinephosphodiesterase ENPP6	Enpp6	6	3	10.212	43902.8	448339
P55066	Neurocan core protein	Ncan	34	16	9.831	276145	2.71482e+06
Q8C3Q5	Protein shisa-7	Shisa7	9	4	9.61	70863.7	681002
Q8R464	Cell adhesion molecule 4	Cadm4	21	7	9.476	176617	1.67361e+06
Q8R366	Immunoglobulin superfamily member 8	Igsf8	24	8	9.079	205687	1.86741e+06
P15116	Cadherin-2	Cdh2	12	6	9.04	72172.2	652464
Q62059	Versican core protein	Vcan	15	8	8.92	173774	1.55002e+06
P10852	4F2 cell-surface antigen heavy chain	Slc3a2	16	8	8.732	188910	1.64949e+06
O88507	Ciliary neurotrophic factor receptor subunit alpha	Cntfr	9	4	8.695	32175.6	279776
O88322	Nidogen-2	Nid2	12	8	8.677	59996.1	520575
Q63912	Oligodendrocyte-myelin glycoprotein	Omg	11	4	8.639	79943.4	690600
O88998	Noelin	Olfm1	8	3	8.301	108574	901258
Q9D8B7	Junctional adhesion molecule C	Jam3	3	2	8.073	40715.2	328694
Q62283	Tetraspanin-7	Tspan7	2	1	7.9	23535.6	185920
Q8BLK3	Limbic system-associated membrane protein	Lsamp	21	8	7.85	324937	2.5508e+06
Q99PJ0	Neurotrimin	Ntm	7	4	7.838	21322.4	167134
P12960	Contactin-1	Cntn1	147	37	7.762	3.73452e+06	2.89859e+07
Q62443	Neuronal pentraxin-1	Nptx1	5	3	7.652	45884.2	351108
Q9R1V7	Disintegrin and metalloproteinase domain-containing protein 23	Adam23	9	5	7.62	95488.8	727662
Q9WVH9	Fibulin-5	Fbln5	2	1	7.27	21556.4	156704
Q9QYS2	Metabotropic glutamate receptor 3	Grm3	20	7	7.264	174208	1.26541e+06
Q61292	Laminin subunit beta-2	Lamb2	55	24	7.141	543591	3.88161e+06
Q8VHW2	Voltage-dependent calcium channel gamma-8 subunit	Cacng8	13	4	6.934	148045	1.0265e+06
P13595	Neural cell adhesion molecule 1	Ncam1	45	13	6.553	2.07271e+06	1.35815e+07
Q05793	Basement membrane-specific heparan sulfate proteoglycan core protein	Hspg2	37	21	6.504	370226	2.40778e+06
Q9Z1L5	Voltage-dependent calcium channel subunit alpha-2/delta-3	Cacna2d3	2	1	6.458	14734.7	95158.2
Q9R1V4	Disintegrin and metalloproteinase domain-containing protein 11	Adam11	3	2	6.451	31123.7	200773
P02468	Laminin subunit gamma-1	Lamc1	15	10	6.374	134920	860023
Q61137	Astrotactin-1	Astn1	4	3	6.35	8732.56	55448.7
Q80YX1	Tenascin	Tnc	13	9	6.329	135918	860235
P02463	Collagen alpha-1(IV) chain	Col4a1	4	2	6.308	37180.8	234546
P09470	Angiotensin-converting enzyme	Ace	11	8	6.3	110719	697547
P20917	Myelin-associated glycoprotein	Mag	21	11	6.1	574570	3.50493e+06
Q6VNS1	NT-3 growth factor receptor	Ntrk3	6	3	6.093	48404.4	294932
Q80TL0	Protein phosphatase 1E	Ppm1e	1	1	6.068	12422.4	75379.1
O35449	Proline-rich transmembrane protein 1	Prrt1	3	2	6.054	50526.4	305884
Q9Z2W8	Glutamate receptor 4	Gria4	15	2	6.052	26324.2	159319
P0C192	Leucine-rich repeat-containing protein 4B	Lrrc4b	6	4	6.012	42652.2	256443
P70663	SPARC-like protein 1	Sparcl1	2	1	5.999	23927.5	143541
Q9JIA1	Leucine-rich glioma-inactivated protein 1	Lgi1	13	8	5.944	248833	1.47912e+06
P01831	Thy-1 membrane glycoprotein	Thy1	16	3	5.677	661134	3.75337e+06
P97797	Tyrosine-protein phosphatase non-receptor type substrate 1	Sirpa	16	7	5.636	389589	2.19584e+06
Q8BLQ9	Cell adhesion molecule 2	Cadm2	7	4	5.484	111951	613958
P09055	Integrin beta-1	Itgb1	6	3	5.473	63977.7	350164
Q9QZF2	Glypican-1	Gpc1	13	7	5.418	130867	709069
Q9R1V6	Disintegrin and metalloproteinase domain-containing protein 22	Adam22	3	2	5.406	41755.7	225730
O88343	Electrogenic sodium bicarbonate cotransporter 1	Slc4a4	9	5	5.346	165106	882593
Q8CJH3	Plexin-B1	Plxnb1	8	4	5.336	70852.6	378088
Q64487	Receptor-type tyrosine-protein phosphatase delta	Ptprd	9	4	5.298	48748.6	258262
B0V2N1	Receptor-type tyrosine-protein phosphatase S	Ptprs	12	5	5.292	88975.6	470831
P10493	Nidogen-1	Nid1	24	12	5.059	345615	1.74847e+06
Q6P9K9	Neurexin-3	Nrxn3	4	2	5.047	42712.8	215587
Q99N28	Cell adhesion molecule 3	Cadm3	15	5	4.994	308717	1.54177e+06
Q80UG2	Plexin-A4	Plxna4	21	7	4.979	101494	505292
Q61361	Brevican core protein	Bcan	38	19	4.968	1.04529e+06	5.19304e+06
Q6NXK7	Inactive dipeptidyl peptidase 10	Dpp10	7	4	4.933	89997.4	443927
P14231	Sodium/potassium-transporting ATPase subunit beta-2	Atp1b2	16	4	4.868	388956	1.89353e+06
O08749	Dihydrolipoyl dehydrogenase, mitochondrial	Dld	6	2	4.726	47726.3	225553
P97370	Sodium/potassium-transporting ATPase subunit beta-3	Atp1b3	1	1	4.713	23566.8	111059
P70232	Neural cell adhesion molecule L1-like protein	Chl1	8	4	4.675	73675.2	344413

## Sheet: S3-5. 1 min 0.16 W-cm2, all
UniProt ID	Protein	Gene	# PSMs	# unique peptides	Fold change: Light(+) vs. (–)	Abundances (Grouped): Light (–)	Abundances (Grouped): Light (+)
Q60625	Intercellular adhesion molecule 5	Icam5	16	5	7.81	125251	978245
B9EKR1	Receptor-type tyrosine-protein phosphatase zeta	Ptprz1	6	1	7.104	26152.4	185796
P23819	Glutamate receptor 2	Gria2	12	5	6.647	185218	1.23116e+06
Q9Z218	Dipeptidyl aminopeptidase-like protein 6	Dpp6	4	3	5.952	100816	600095
P23818	Glutamate receptor 1	Gria1	12	3	5.891	88107.5	519012
Q9Z2W9	Glutamate receptor 3	Gria3	9	4	5.133	117353	602384
Q8VCM7	Fibrinogen gamma chain	Fgg	58	14	4.293	2.80473e+06	1.20421e+07
Q61316	Heat shock 70 kDa protein 4	Hspa4	2	1	4.278	20292.3	86811
Q9CPW0	Contactin-associated protein-like 2	Cntnap2	2	2	3.931	23476.9	92280.5
Q05793	Basement membrane-specific heparan sulfate proteoglycan core protein	Hspg2	6	4	3.597	38671.9	139111
Q9CQE1	Protein NipSnap homolog 3B	Nipsnap3b	4	2	2.984	108685	324339
Q8BYI9	Tenascin-R	Tnr	16	8	2.963	374305	1.10919e+06
Q3TXX4	Vesicular glutamate transporter 1	Slc17a7	12	5	2.873	412014	1.1839e+06
Q810U3	Neurofascin	Nfasc	10	7	2.52	190795	480821
P43277	Histone H1.3	H1-3	16	2	2.367	356363	843493
P43274	Histone H1.4	H1-4	16	2	2.198	115132	253016
P10493	Nidogen-1	Nid1	4	3	2.165	203397	440358
Q9JIA1	Leucine-rich glioma-inactivated protein 1	Lgi1	4	2	1.989	94060.6	187069
Q60598	Src substrate cortactin	Cttn	1	1	1.987	28520.7	56662.9
P12960	Contactin-1	Cntn1	53	15	1.9	2.07848e+06	3.94864e+06
P17897	Lysozyme C-1	Lyz1	4	1	1.871	291182	544798
Q8BLQ9	Cell adhesion molecule 2	Cadm2	2	1	1.851	62155.5	115079
P04925	Major prion protein	Prnp	1	1	1.781	16532.5	29451
Q8VHW2	Voltage-dependent calcium channel gamma-8 subunit	Cacng8	8	2	1.754	129702	227460
Q61598	Rab GDP dissociation inhibitor beta	Gdi2	10	1	1.75	30011	52508.3
Q9CPY7	Cytosol aminopeptidase	Lap3	6	3	1.739	135111	234973
P14231	Sodium/potassium-transporting ATPase subunit beta-2	Atp1b2	9	2	1.699	388914	660926
Q8R366	Immunoglobulin superfamily member 8	Igsf8	3	2	1.698	36167.8	61415.2
Q2PFD7	PH and SEC7 domain-containing protein 3	Psd3	6	3	1.687	31549.8	53231.2
Q9R0P9	Ubiquitin carboxyl-terminal hydrolase isozyme L1	Uchl1	18	7	1.654	734186	1.21455e+06
P12382	ATP-dependent 6-phosphofructokinase, liver type	Pfkl	2	1	1.643	42903.9	70476.1
P61205	ADP-ribosylation factor 3	Arf3	15	4	1.623	779493	1.26529e+06
Q8C0M9	Isoaspartyl peptidase/L-asparaginase	Asrgl1	12	5	1.62	317819	514851
Q9DCX2	ATP synthase subunit d, mitochondrial	Atp5pd	6	2	1.612	130394	210225
E9Q557	Desmoplakin	Dsp	46	16	1.61	2.85826e+06	4.60073e+06
P01831	Thy-1 membrane glycoprotein	Thy1	10	2	1.603	591072	947530
P11276	Fibronectin	Fn1	13	5	1.581	270510	427585
Q91V41	Ras-related protein Rab-14	Rab14	2	1	1.556	87699.3	136422
P17751	Triosephosphate isomerase	Tpi1	41	13	1.539	2.84853e+06	4.38425e+06
Q8BG39	Synaptic vesicle glycoprotein 2B	Sv2b	3	1	1.52	50315.6	76465.3
P20029	Endoplasmic reticulum chaperone BiP	Hspa5	9	1	1.513	81219.1	122898
P70202	Latexin	Lxn	4	2	1.494	99333.5	148449
P06837	Neuromodulin	Gap43	5	1	1.488	207547	308728
Q9D5Y1	Coiled-coil domain-containing protein 39	Ccdc39	5	1	1.482	256788	380606
Q91VC3	Eukaryotic initiation factor 4A-III	Eif4a3	2	1	1.471	71711.6	105499
Q9R1P3	Proteasome subunit beta type-2	Psmb2	1	1	1.454	44537	64739.6
P13595	Neural cell adhesion molecule 1	Ncam1	24	7	1.451	1.07352e+06	1.55797e+06
Q9Z2H5	Band 4.1-like protein 1	Epb41l1	5	3	1.439	63152.4	90886.3
Q8VEH3	ADP-ribosylation factor-like protein 8A	Arl8a	3	1	1.435	55589.9	79747.8
P31650	Sodium- and chloride-dependent GABA transporter 3	Slc6a11	3	1	1.434	81190.1	116395
P47754	F-actin-capping protein subunit alpha-2	Capza2	10	4	1.432	477039	683064
Q8C1B7	Septin-11	Septin11	10	2	1.431	414591	593389
P97797	Tyrosine-protein phosphatase non-receptor type substrate 1	Sirpa	2	2	1.402	69566.6	97525.5
P68254	14-3-3 protein theta	Ywhaq	18	1	1.383	64268	88906.4
Q9D6F9	Tubulin beta-4A chain	Tubb4a	216	3	1.375	534544	734923
Q8K2B3	Succinate dehydrogenase	Sdha	2	2	1.362	72261.7	98446.4
P50516	V-type proton ATPase catalytic subunit A	Atp6v1a	30	12	1.344	1.93427e+06	2.59937e+06
Q7TQD2	Tubulin polymerization-promoting protein	Tppp	11	4	1.341	877120	1.17591e+06
Q62420	Endophilin-A1	Sh3gl2	5	2	1.341	89369.1	119812
P34884	Macrophage migration inhibitory factor	Mif	60	4	1.34	1.5113e+07	2.02512e+07
P05202	Aspartate aminotransferase, mitochondrial	Got2	111	20	1.334	1.81454e+07	2.42069e+07
P20357	Microtubule-associated protein 2	Map2	32	12	1.327	874460	1.16034e+06
Q64332	Synapsin-2	Syn2	26	8	1.325	1.29232e+06	1.71172e+06
Q99PT1	Rho GDP-dissociation inhibitor 1	Arhgdia	16	4	1.322	1.02542e+06	1.3555e+06
P97300	Neuroplastin	Nptn	17	5	1.317	774964	1.02044e+06
Q71M36	Chondroitin sulfate proteoglycan 5	Cspg5	5	2	1.31	495756	649520
Q7TSJ2	Microtubule-associated protein 6	Map6	7	2	1.307	34633.8	45282.4
Q9D0M5	Dynein light chain 2, cytoplasmic	Dynll2	4	2	1.303	130993	170728
P62761	Visinin-like protein 1	Vsnl1	1	1	1.302	61432.4	79956
Q91XV3	Brain acid soluble protein 1	Basp1	14	6	1.297	1.01249e+06	1.31327e+06
P32037	Solute carrier family 2, facilitated glucose transporter member 3	Slc2a3	3	1	1.296	193685	250935
Q7TSF1	Desmoglein-1-beta	Dsg1b	1	1	1.294	141482	183015
P62631	Elongation factor 1-alpha 2	Eef1a2	48	3	1.293	610647	789504
P62259	14-3-3 protein epsilon	Ywhae	27	7	1.291	533068	688252
C0HKE3	Histone H2A type 1-D	H2ac7	25	2	1.291	3.38305e+06	4.3661e+06
Q61361	Brevican core protein	Bcan	4	2	1.29	681512	879469
Q62108	Disks large homolog 4	Dlg4	7	4	1.288	203564	262172
Q9Z140	Copine-6	Cpne6	6	2	1.288	222044	285893
P05201	Aspartate aminotransferase, cytoplasmic	Got1	84	19	1.282	7.25669e+06	9.30337e+06
Q9ERD7	Tubulin beta-3 chain	Tubb3	190	5	1.277	475495	607051
P31648	Sodium- and chloride-dependent GABA transporter 1	Slc6a1	4	1	1.273	175153	222911
Q61792	LIM and SH3 domain protein 1	Lasp1	8	3	1.272	307818	391638
Q8CI94	Glycogen phosphorylase, brain form	Pygb	5	4	1.267	208659	264415
Q5M8N0	CB1 cannabinoid receptor-interacting protein 1	Cnrip1	5	3	1.265	201619	255063
Q05816	Fatty acid-binding protein 5	Fabp5	2	1	1.263	120114	151756
Q99LX0	Parkinson disease protein 7 homolog	Park7	2	1	1.263	49424.6	62436.1
Q8BMF4	Dihydrolipoyllysine-residue acetyltransferase component of pyruvate dehydrogenase complex, mitochondrial	Dlat	15	5	1.263	1.01696e+06	1.28396e+06
P04370	Myelin basic protein	Mbp	23	5	1.261	4.16445e+06	5.25339e+06
Q9CQD1	Ras-related protein Rab-5A	Rab5a	5	1	1.254	38387.5	48126.5
Q61553	Fascin	Fscn1	11	3	1.252	399290	499818
O88342	WD repeat-containing protein 1	Wdr1	25	6	1.251	1.06912e+06	1.33727e+06
Q8CHH9	Septin-8	Septin8	10	2	1.248	54708.4	68296.5
Q61171	Peroxiredoxin-2	Prdx2	31	8	1.248	3.99075e+06	4.98137e+06
P60879	Synaptosomal-associated protein 25	Snap25	4	1	1.248	55565.6	69334.9
P43006	Excitatory amino acid transporter 2	Slc1a2	34	9	1.245	7.24794e+06	9.0227e+06
P31324	cAMP-dependent protein kinase type II-beta regulatory subunit	Prkar2b	7	4	1.243	94678	117657
Q8BGT8	Phytanoyl-CoA hydroxylase-interacting protein-like	Phyhipl	5	1	1.24	178345	221176
P40142	Transketolase	Tkt	24	9	1.237	1.27531e+06	1.57701e+06
Q9QYR6	Microtubule-associated protein 1A	Map1a	14	6	1.233	383305	472703
P18760	Cofilin-1	Cfl1	17	6	1.218	1.27693e+06	1.55583e+06
P52760	2-iminobutanoate/2-iminopropanoate deaminase	Rida	4	2	1.218	163282	198934
P63328	Protein phosphatase 3 catalytic subunit alpha	Ppp3ca	34	9	1.211	2.0869e+06	2.52621e+06
P08228	Superoxide dismutase	Sod1	17	4	1.21	1.31866e+06	1.59538e+06
P08551	Neurofilament light polypeptide	Nefl	18	3	1.208	280901	339383
P20108	Thioredoxin-dependent peroxide reductase, mitochondrial	Prdx3	17	4	1.208	650116	785282
P19157	Glutathione S-transferase P 1	Gstp1	1	1	1.203	210322	252969
Q9DBJ1	Phosphoglycerate mutase 1	Pgam1	20	5	1.202	1.34018e+06	1.61092e+06
Q8K0U4	Heat shock 70 kDa protein 12A	Hspa12a	5	2	1.196	83758.4	100215
Q01768	Nucleoside diphosphate kinase B	Nme2	18	4	1.196	1.0562e+06	1.26299e+06
P63085	Mitogen-activated protein kinase 1	Mapk1	4	1	1.194	90214.9	107730
Q9Z0E0	Neurochondrin	Ncdn	25	5	1.19	437303	520550
Q6NXK7	Inactive dipeptidyl peptidase 10	Dpp10	1	1	1.184	32417.2	38397.4
Q9D6M3	Mitochondrial glutamate carrier 1	Slc25a22	14	4	1.18	860722	1.01597e+06
Q8BGH2	Sorting and assembly machinery component 50 homolog	Samm50	2	1	1.178	41876.7	49320.8
P08553	Neurofilament medium polypeptide	Nefm	53	16	1.177	2.96393e+06	3.4885e+06
P31938	Dual specificity mitogen-activated protein kinase kinase 1	Map2k1	4	1	1.175	94286.5	110749
P18872	Guanine nucleotide-binding protein G(o) subunit alpha	Gnao1	32	9	1.17	3.83782e+06	4.49188e+06
Q7TMM9	Tubulin beta-2A chain	Tubb2a	313	2	1.17	4.28423e+07	5.01349e+07
P62908	40S ribosomal protein S3	Rps3	3	1	1.169	85717.3	100242
P00493	Hypoxanthine-guanine phosphoribosyltransferase	Hprt1	10	4	1.166	586261	683666
Q9CYT6	Adenylyl cyclase-associated protein 2	Cap2	4	2	1.166	87314.3	101769
Q9WV92	Band 4.1-like protein 3	Epb41l3	9	4	1.165	41933.2	48859.5
P61264	Syntaxin-1B	Stx1b	10	3	1.162	559967	650905
P16546	Spectrin alpha chain, non-erythrocytic 1	Sptan1	41	17	1.162	998469	1.16045e+06
P62897	Cytochrome c, somatic	Cycs	2	1	1.16	465276	539729
Q62425	Cytochrome c oxidase subunit NDUFA4	Ndufa4	4	1	1.16	203768	236317
Q9JKD3	Secretory carrier-associated membrane protein 5	Scamp5	2	1	1.151	115534	133009
Q02257	Junction plakoglobin	Jup	47	13	1.148	2.18876e+06	2.51376e+06
Q9JIS5	Synaptic vesicle glycoprotein 2A	Sv2a	6	3	1.148	78935.2	90655.5
Q60668	Heterogeneous nuclear ribonucleoprotein D0	Hnrnpd	2	1	1.147	84918.6	97432.6
Q8VEM8	Phosphate carrier protein, mitochondrial	Slc25a3	10	4	1.145	538199	616502
P51881	ADP/ATP translocase 2	Slc25a5	59	5	1.145	1.28927e+06	1.4757e+06
Q99N28	Cell adhesion molecule 3	Cadm3	11	3	1.143	223167	255140
P17426	AP-2 complex subunit alpha-1	Ap2a1	22	3	1.138	832234	946809
P61027	Ras-related protein Rab-10	Rab10	10	2	1.134	266408	302218
P70349	Adenosine 5'-monophosphoramidase HINT1	Hint1	3	1	1.134	47821.5	54243.4
P63017	Heat shock cognate 71 kDa protein	Hspa8	75	19	1.134	7.98677e+06	9.05597e+06
P97447	Four and a half LIM domains protein 1	Fhl1	4	3	1.132	373853	423121
P68368	Tubulin alpha-4A chain	Tuba4a	177	6	1.127	3.18829e+06	3.5941e+06
P63101	14-3-3 protein zeta/delta	Ywhaz	50	8	1.127	1.0027e+07	1.13008e+07
Q9R0Q6	Actin-related protein 2/3 complex subunit 1A	Arpc1a	3	1	1.126	150128	168983
P62874	Guanine nucleotide-binding protein G(I)/G(S)/G(T) subunit beta-1	Gnb1	21	3	1.125	1.03699e+06	1.16678e+06
P99029	Peroxiredoxin-5, mitochondrial	Prdx5	13	4	1.124	454261	510549
P61226	Ras-related protein Rap-2b	Rap2b	6	1	1.124	143911	161687
P70404	Isocitrate dehydrogenase	Idh3g	1	1	1.123	46483.4	52179.9
P99024	Tubulin beta-5 chain	Tubb5	273	5	1.116	4.38926e+06	4.90021e+06
Q6PIC6	Sodium/potassium-transporting ATPase subunit alpha-3	Atp1a3	215	23	1.115	2.24247e+07	2.50097e+07
P14094	Sodium/potassium-transporting ATPase subunit beta-1	Atp1b1	32	6	1.115	3.241e+06	3.61436e+06
P84091	AP-2 complex subunit mu	Ap2m1	8	3	1.115	503399	561356
Q9QYC0	Alpha-adducin	Add1	6	3	1.111	241477	268205
Q9D8N0	Elongation factor 1-gamma	Eef1g	1	1	1.108	95244.9	105518
P35505	Fumarylacetoacetase	Fah	1	1	1.105	50422.5	55714.9
Q91XM9	Disks large homolog 2	Dlg2	2	2	1.105	33022.9	36476.6
P62827	GTP-binding nuclear protein Ran	Ran	7	2	1.104	207957	229627
P11798	Calcium/calmodulin-dependent protein kinase type II subunit alpha	Camk2a	69	11	1.104	8.26713e+06	9.12807e+06
Q9CPU0	Lactoylglutathione lyase	Glo1	5	2	1.104	638158	704397
P60867	40S ribosomal protein S20	Rps20	1	1	1.102	72931.8	80369
Q91V12	Cytosolic acyl coenzyme A thioester hydrolase	Acot7	7	3	1.102	211872	233465
P16330	2',3'-cyclic-nucleotide 3'-phosphodiesterase	Cnp	70	17	1.099	6.44037e+06	7.07934e+06
Q9R1S8	Calpain-7	Capn7	4	1	1.098	380101	417478
Q9Z0P4	Paralemmin-1	Palm	2	2	1.096	54531.8	59780.1
P15105	Glutamine synthetase	Glul	38	9	1.096	2.77766e+06	3.04301e+06
Q62277	Synaptophysin	Syp	5	1	1.092	888706	970095
P46096	Synaptotagmin-1	Syt1	39	11	1.091	1.75883e+06	1.91973e+06
O08553	Dihydropyrimidinase-related protein 2	Dpysl2	96	15	1.09	6.33581e+06	6.90517e+06
P17182	Alpha-enolase	Eno1	37	7	1.09	1.71233e+06	1.86603e+06
P47963	60S ribosomal protein L13	Rpl13	2	1	1.085	36956.2	40084.1
P56564	Excitatory amino acid transporter 1	Slc1a3	11	3	1.085	1.49709e+06	1.62365e+06
Q9WUM5	Succinate--CoA ligase	Suclg1	6	3	1.083	259441	281000
P68369	Tubulin alpha-1A chain	Tuba1a	198	7	1.082	4.51288e+07	4.88401e+07
P62743	AP-2 complex subunit sigma	Ap2s1	5	1	1.081	179091	193556
Q68FD5	Clathrin heavy chain 1	Cltc	99	26	1.078	4.0868e+06	4.40515e+06
P62746	Rho-related GTP-binding protein RhoB	Rhob	2	2	1.075	115843	124487
P61982	14-3-3 protein gamma	Ywhag	25	5	1.072	1.25218e+06	1.34234e+06
Q9CQC7	NADH dehydrogenase	Ndufb4	2	1	1.071	64095.1	68643
G5E829	Plasma membrane calcium-transporting ATPase 1	Atp2b1	24	3	1.07	650681	696539
Q91V61	Sideroflexin-3	Sfxn3	4	2	1.069	247315	264290
P17710	Hexokinase-1	Hk1	28	8	1.067	1.20961e+06	1.29052e+06
P50518	V-type proton ATPase subunit E 1	Atp6v1e1	8	2	1.067	478253	510066
P07724	Albumin	Alb	34	10	1.066	1.95313e+06	2.08264e+06
Q9CZ13	Cytochrome b-c1 complex subunit 1, mitochondrial	Uqcrc1	13	5	1.064	191982	204296
P06151	L-lactate dehydrogenase A chain	Ldha	24	6	1.061	1.67588e+06	1.77781e+06
P19783	Cytochrome c oxidase subunit 4 isoform 1, mitochondrial	Cox4i1	19	5	1.058	1.02052e+06	1.07933e+06
Q9Z2I9	Succinate--CoA ligase	Sucla2	1	1	1.057	54850.4	58002.7
Q91ZA3	Propionyl-CoA carboxylase alpha chain, mitochondrial	Pcca	604	52	1.057	2.61134e+08	2.76085e+08
Q9D2G2	Dihydrolipoyllysine-residue succinyltransferase component of 2-oxoglutarate dehydrogenase complex, mitochondrial	Dlst	4	2	1.055	149426	157682
P09411	Phosphoglycerate kinase 1	Pgk1	20	7	1.055	1.88658e+06	1.99074e+06
Q9WVJ2	26S proteasome non-ATPase regulatory subunit 13	Psmd13	1	1	1.055	44900.1	47353.3
P68510	14-3-3 protein eta	Ywhah	13	1	1.054	170324	179443
Q60771	Claudin-11	Cldn11	3	1	1.053	422050	444625
P46460	Vesicle-fusing ATPase	Nsf	43	14	1.053	2.26904e+06	2.3882e+06
P57722	Poly(rC)-binding protein 3	Pcbp3	7	1	1.052	117273	123416
Q8K596	Sodium/calcium exchanger 2	Slc8a2	2	1	1.052	76902.6	80904
P10126	Elongation factor 1-alpha 1	Eef1a1	51	4	1.048	5.81905e+06	6.09971e+06
Q01853	Transitional endoplasmic reticulum ATPase	Vcp	2	1	1.045	33344.8	34851.5
P16858	Glyceraldehyde-3-phosphate dehydrogenase	Gapdh	77	13	1.044	1.45599e+07	1.52032e+07
P10853	Histone H2B type 1-F/J/L	H2bc7	19	3	1.039	3.24526e+06	3.37327e+06
Q9D6R2	Isocitrate dehydrogenase	Idh3a	8	2	1.039	258979	269123
P47857	ATP-dependent 6-phosphofructokinase, muscle type	Pfkm	3	2	1.036	204007	211346
P08249	Malate dehydrogenase, mitochondrial	Mdh2	70	15	1.035	9.38559e+06	9.71847e+06
Q9CZU6	Citrate synthase, mitochondrial	Cs	11	3	1.035	665958	689003
P63011	Ras-related protein Rab-3A	Rab3a	25	4	1.033	3.98762e+06	4.12118e+06
P52480	Pyruvate kinase PKM	Pkm	50	15	1.032	4.27238e+06	4.40698e+06
P62806	Histone H4	H4c1	10	4	1.029	2.16526e+06	2.2287e+06
P63318	Protein kinase C gamma type	Prkcg	18	4	1.029	482386	496274
P48758	Carbonyl reductase	Cbr1	8	2	1.028	310072	318708
O08709	Peroxiredoxin-6	Prdx6	17	6	1.024	385625	395061
Q64436	Potassium-transporting ATPase alpha chain 1	Atp4a	33	1	1.024	778091	796907
P60766	Cell division control protein 42 homolog	Cdc42	8	1	1.02	225153	229647
P16125	L-lactate dehydrogenase B chain	Ldhb	22	6	1.019	3.85055e+06	3.92194e+06
P97427	Dihydropyrimidinase-related protein 1	Crmp1	44	5	1.018	1.09703e+06	1.11703e+06
O55131	Septin-7	Septin7	3	1	1.016	75949.3	77154.7
P50396	Rab GDP dissociation inhibitor alpha	Gdi1	23	4	1.014	1.14279e+06	1.15862e+06
Q91WS0	CDGSH iron-sulfur domain-containing protein 1	Cisd1	5	2	1.014	261552	265117
O08599	Syntaxin-binding protein 1	Stxbp1	22	7	1.011	1.44843e+06	1.46447e+06
Q99MR8	Methylcrotonoyl-CoA carboxylase subunit alpha, mitochondrial	Mccc1	205	34	1.01	3.14021e+07	3.17257e+07
P11499	Heat shock protein HSP 90-beta	Hsp90ab1	39	9	1.006	1.23551e+06	1.24265e+06
Q62261	Spectrin beta chain, non-erythrocytic 1	Sptbn1	17	10	1.006	471425	474092
P62880	Guanine nucleotide-binding protein G(I)/G(S)/G(T) subunit beta-2	Gnb2	17	3	1.005	740880	744856
P39053	Dynamin-1	Dnm1	41	14	1.005	2.32486e+06	2.3356e+06
Q8R191	Synaptogyrin-3	Syngr3	2	1	1.004	302339	303698
Q8VDQ8	NAD-dependent protein deacetylase sirtuin-2	Sirt2	13	5	1.003	731259	733593
P58252	Elongation factor 2	Eef2	8	3	0.999	229337	229170
O35737	Heterogeneous nuclear ribonucleoprotein H	Hnrnph1	2	1	0.998	87335.9	87180.9
P03995	Glial fibrillary acidic protein	Gfap	83	5	0.998	616706	615410
Q9R111	Guanine deaminase	Gda	2	1	0.998	61981.1	61832.4
P46660	Alpha-internexin	Ina	40	9	0.994	1.33803e+06	1.32998e+06
Q06185	ATP synthase subunit e, mitochondrial	Atp5me	2	1	0.992	117806	116873
O89053	Coronin-1A	Coro1a	6	3	0.99	175823	174133
P56391	Cytochrome c oxidase subunit 6B1	Cox6b1	7	1	0.986	101971	100541
P68372	Tubulin beta-4B chain	Tubb4b	249	1	0.977	2.95066e+06	2.88273e+06
P48962	ADP/ATP translocase 1	Slc25a4	65	7	0.975	1.09522e+07	1.06732e+07
Q6PAQ4	RNA exonuclease 4	Rexo4	1	1	0.973	19743.7	19205.7
Q9D051	Pyruvate dehydrogenase E1 component subunit beta, mitochondrial	Pdhb	7	4	0.973	316155	307535
P35279	Ras-related protein Rab-6A	Rab6a	2	1	0.971	89936.9	87355
P97315	Cysteine and glycine-rich protein 1	Csrp1	7	3	0.97	440578	427553
Q9CQN1	Heat shock protein 75 kDa, mitochondrial	Trap1	4	1	0.968	831439	804809
P35802	Neuronal membrane glycoprotein M6-a	Gpm6a	10	3	0.967	831796	804450
Q8BFR5	Elongation factor Tu, mitochondrial	Tufm	7	4	0.967	287337	277811
P60202	Myelin proteolipid protein	Plp1	35	6	0.966	1.06564e+07	1.02966e+07
Q8VDN2	Sodium/potassium-transporting ATPase subunit alpha-1	Atp1a1	123	7	0.963	1.08421e+06	1.04424e+06
P63001	Ras-related C3 botulinum toxin substrate 1	Rac1	7	3	0.963	740915	713492
P35486	Pyruvate dehydrogenase E1 component subunit alpha, somatic form, mitochondrial	Pdha1	49	15	0.959	3.29858e+06	3.16276e+06
Q99KI0	Aconitate hydratase, mitochondrial	Aco2	43	11	0.955	2.33926e+06	2.23309e+06
D3Z7P3	Glutaminase kidney isoform, mitochondrial	Gls	13	4	0.952	472531	449812
Q9CR68	Cytochrome b-c1 complex subunit Rieske, mitochondrial	Uqcrfs1	9	2	0.951	366758	348768
Q8K386	Ras-related protein Rab-15	Rab15	6	1	0.951	487322	463289
P84075	Neuron-specific calcium-binding protein hippocalcin	Hpca	4	1	0.95	252399	239866
P07901	Heat shock protein HSP 90-alpha	Hsp90aa1	19	5	0.95	403916	383658
Q9DB77	Cytochrome b-c1 complex subunit 2, mitochondrial	Uqcrc2	4	2	0.949	159269	151120
P62823	Ras-related protein Rab-3C	Rab3c	5	2	0.947	216843	205257
P27600	Guanine nucleotide-binding protein subunit alpha-12	Gna12	8	1	0.946	948382	897463
Q8K0T0	Reticulon-1	Rtn1	3	1	0.944	177428	167505
Q03265	ATP synthase subunit alpha, mitochondrial	Atp5f1a	79	19	0.944	9.16798e+06	8.6546e+06
Q05920	Pyruvate carboxylase, mitochondrial	Pc	645	61	0.944	2.71285e+08	2.56047e+08
Q9CQ69	Cytochrome b-c1 complex subunit 8	Uqcrq	2	1	0.944	111952	105640
Q8CHC4	Synaptojanin-1	Synj1	3	1	0.938	142086	133323
P56480	ATP synthase subunit beta, mitochondrial	Atp5f1b	56	12	0.937	4.53494e+06	4.24956e+06
P21550	Beta-enolase	Eno3	21	1	0.937	309448	289859
Q8BH59	Electrogenic aspartate/glutamate antiporter SLC25A12, mitochondrial	Slc25a12	8	4	0.935	276239	258251
P70296	Phosphatidylethanolamine-binding protein 1	Pebp1	4	1	0.934	169312	158104
P28652	Calcium/calmodulin-dependent protein kinase type II subunit beta	Camk2b	35	3	0.933	351223	327797
Q791V5	Mitochondrial carrier homolog 2	Mtch2	3	1	0.932	96062.8	89507.2
P10649	Glutathione S-transferase Mu 1	Gstm1	7	2	0.928	359091	333120
Q91YH6	V-type proton ATPase subunit B, kidney isoform	Atp6v1b1	5	2	0.925	111896	103505
Q60931	Voltage-dependent anion-selective channel protein 3	Vdac3	16	4	0.923	3.09487e+06	2.857e+06
Q9R0P5	Destrin	Dstn	2	1	0.923	107656	99342.3
P07356	Annexin A2	Anxa2	9	5	0.922	261937	241421
P28661	Septin-4	Septin4	2	1	0.921	163562	150702
P62821	Ras-related protein Rab-1A	Rab1A	2	1	0.92	94580.7	87034.5
Q9DB20	ATP synthase subunit O, mitochondrial	Atp5po	7	2	0.918	258383	237220
Q60932	Voltage-dependent anion-selective channel protein 1	Vdac1	41	11	0.918	4.54899e+06	4.17385e+06
Q9CQR4	Acyl-coenzyme A thioesterase 13	Acot13	5	1	0.915	140063	128110
Q9DBG3	AP-2 complex subunit beta	Ap2b1	12	4	0.913	421609	385039
Q5SWU9	Acetyl-CoA carboxylase 1	Acaca	179	44	0.911	1.4145e+07	1.28845e+07
P09671	Superoxide dismutase	Sod2	6	3	0.908	670824	609247
P02088	Hemoglobin subunit beta-1	Hbb-b1	27	8	0.896	2.55186e+06	2.28609e+06
P27773	Protein disulfide-isomerase A3	Pdia3	1	1	0.893	53391.2	47659.6
P47757	F-actin-capping protein subunit beta	Capzb	10	3	0.893	392106	349994
Q9DCZ4	MICOS complex subunit Mic26	Apoo	4	2	0.891	174076	155166
Q91VR2	ATP synthase subunit gamma, mitochondrial	Atp5f1c	3	2	0.891	159259	141858
Q6PIE5	Sodium/potassium-transporting ATPase subunit alpha-2	Atp1a2	157	10	0.885	1.63526e+06	1.44695e+06
Q5SQX6	Cytoplasmic FMR1-interacting protein 2	Cyfip2	4	2	0.883	123427	109021
P51863	V-type proton ATPase subunit d 1	Atp6v0d1	4	1	0.883	92795.8	81898.9
Q6Q477	Plasma membrane calcium-transporting ATPase 4	Atp2b4	14	1	0.883	59655.3	52647.7
Q920N2	Biotin--protein ligase	Hlcs	5	3	0.882	81219.8	71631.4
Q62188	Dihydropyrimidinase-related protein 3	Dpysl3	42	5	0.879	630717	554536
P17183	Gamma-enolase	Eno2	44	8	0.875	2.89565e+06	2.53499e+06
Q9CQI6	Coactosin-like protein	Cotl1	5	3	0.873	87980.3	76824.2
Q9CVB6	Actin-related protein 2/3 complex subunit 2	Arpc2	6	3	0.872	223768	195195
Q9EQF6	Dihydropyrimidinase-related protein 5	Dpysl5	13	5	0.872	177588	154819
P14152	Malate dehydrogenase, cytoplasmic	Mdh1	20	7	0.868	1.62376e+06	1.4089e+06
Q9DC69	NADH dehydrogenase	Ndufa9	3	2	0.863	80210.7	69202.4
P48774	Glutathione S-transferase Mu 5	Gstm5	9	1	0.862	129859	111995
Q02053	Ubiquitin-like modifier-activating enzyme 1	Uba1	2	2	0.853	60170.5	51330.4
P0DP27	Calmodulin-2	Calm2	8	2	0.853	286965	244691
P14873	Microtubule-associated protein 1B	Map1b	6	2	0.851	39323.8	33460.5
Q9QYG0	Protein NDRG2	Ndrg2	3	1	0.849	107757	91498.5
Q9CR62	Mitochondrial 2-oxoglutarate/malate carrier protein	Slc25a11	3	1	0.847	130556	110542
P56135	ATP synthase subunit f, mitochondrial	Atp5mf	3	1	0.846	141459	119708
Q99P72	Reticulon-4	Rtn4	2	1	0.84	101541	85325.4
Q60930	Voltage-dependent anion-selective channel protein 2	Vdac2	23	5	0.835	2.7747e+06	2.31562e+06
P35979	60S ribosomal protein L12	Rpl12	3	2	0.832	94646.2	78777.5
P35293	Ras-related protein Rab-18	Rab18	4	1	0.827	74002.4	61176.1
Q571F8	Glutaminase liver isoform, mitochondrial	Gls2	2	1	0.818	137007	112079
Q9JKC6	Cell cycle exit and neuronal differentiation protein 1	Cend1	3	2	0.817	241782	197446
Q04447	Creatine kinase B-type	Ckb	34	9	0.813	6.33889e+06	5.15184e+06
Q7TQF7	Amphiphysin	Amph	2	2	0.808	81854.3	66177.9
Q61176	Arginase-1	Arg1	5	2	0.807	197363	159285
O35098	Dihydropyrimidinase-related protein 4	Dpysl4	1	1	0.806	52345.8	42177.2
P40124	Adenylyl cyclase-associated protein 1	Cap1	3	1	0.803	79382.2	63705.4
Q9DC70	NADH dehydrogenase	Ndufs7	2	1	0.785	104781	82225.7
P51150	Ras-related protein Rab-7a	Rab7a	5	1	0.771	197617	152291
P00405	Cytochrome c oxidase subunit 2	Mtco2	11	2	0.767	536764	411563
P14733	Lamin-B1	Lmnb1	1	1	0.758	22209.9	16837.2
Q9Z1G4	V-type proton ATPase 116 kDa subunit a 1	Atp6v0a1	12	4	0.748	339194	253717
P63038	60 kDa heat shock protein, mitochondrial	Hspd1	7	3	0.743	96443.3	71628.3
P53994	Ras-related protein Rab-2A	Rab2a	2	1	0.733	67421.7	49411.6
P08113	Endoplasmin	Hsp90b1	6	1	0.728	151975	110651
Q91VD9	NADH-ubiquinone oxidoreductase 75 kDa subunit, mitochondrial	Ndufs1	12	3	0.726	463536	336319
P28271	Cytoplasmic aconitate hydratase	Aco1	51	15	0.718	4.32507e+06	3.10408e+06
Q9D3D9	ATP synthase subunit delta, mitochondrial	Atp5f1d	2	1	0.701	84706.3	59380.9
Q8QZT1	Acetyl-CoA acetyltransferase, mitochondrial	Acat1	7	4	0.699	681211	476347
P01869	Ig gamma-1 chain C region, membrane-bound form	Ighg1	9	3	0.673	1.47018e+06	990091
O88935	Synapsin-1	Syn1	21	9	0.673	1.13324e+06	762144
Q08189	Protein-glutamine gamma-glutamyltransferase E	Tgm3	1	1	0.642	157869	101292
O08749	Dihydrolipoyl dehydrogenase, mitochondrial	Dld	2	2	0.631	186285	117457
P59999	Actin-related protein 2/3 complex subunit 4	Arpc4	6	2	0.569	421769	240194
P05063	Fructose-bisphosphate aldolase C	Aldoc	41	9	0.521	1.39334e+06	726292
P01837	Immunoglobulin kappa constant	Igkc	7	1	0.505	230368	116392
P99026	Proteasome subunit beta type-4	Psmb4	1	1	0.473	31654.2	14961.6
O55143	Sarcoplasmic/endoplasmic reticulum calcium ATPase 2	Atp2a2	8	2	0.356	1.41382e+06	502622
P0C0S6	Histone H2A.Z	H2az1	20	1	0.335	121978	40840.3
Q9QXA5	U6 snRNA-associated Sm-like protein LSm4	Lsm4	2	1	0.024	1.1131e+06	27174.5

## Sheet: S3-6. 10 min 0.16 W-cm2, all
UniProt ID	Protein	Gene	# PSMs	# unique peptides	Fold change: Light (+) vs. Light (–)	Abundances (Grouped): Light(–)	Abundances (Grouped): Light(+)
Q810U4	Neuronal cell adhesion molecule	Nrcam	2	2	10.508	11572.9	121610
B9EKR1	Receptor-type tyrosine-protein phosphatase zeta	Ptprz1	6	1	9.307	20883.3	194364
P97350	Plakophilin-1	Pkp1	7	4	7.547	35675.7	269242
Q9D1T0	Leucine-rich repeat and immunoglobulin-like domain-containing nogo receptor-interacting protein 1	Lingo1	2	2	6.308	33269.8	209852
P23818	Glutamate receptor 1	Gria1	18	7	6.067	220060	1.33507e+06
Q60625	Intercellular adhesion molecule 5	Icam5	24	10	5.814	208946	1.2148e+06
Q9Z2W9	Glutamate receptor 3	Gria3	14	5	5.38	106520	573114
Q8BYI9	Tenascin-R	Tnr	28	14	4.954	518067	2.56671e+06
P23819	Glutamate receptor 2	Gria2	16	7	4.789	175178	838947
O88343	Electrogenic sodium bicarbonate cotransporter 1	Slc4a4	1	1	4.674	10877.1	50843.1
P55066	Neurocan core protein	Ncan	5	3	4.17	43665.2	182097
O88998	Noelin	Olfm1	1	1	3.456	55451.8	191669
P15116	Cadherin-2	Cdh2	1	1	3.453	25893.4	89416.9
Q62059	Versican core protein	Vcan	2	1	3.218	36240.6	116615
O70554	Small proline-rich protein 2B	Sprr2b	1	1	3.055	7611.63	23255.3
Q05793	Basement membrane-specific heparan sulfate proteoglycan core protein	Hspg2	3	2	2.987	39075.9	116727
Q8BLQ9	Cell adhesion molecule 2	Cadm2	2	1	2.714	60078.5	163040
Q9Z218	Dipeptidyl aminopeptidase-like protein 6	Dpp6	3	2	2.655	72154.1	191568
Q810U3	Neurofascin	Nfasc	10	6	2.577	151954	391524
P17809	Solute carrier family 2, facilitated glucose transporter member 1	Slc2a1	2	1	2.526	43942.8	111005
P10852	4F2 cell-surface antigen heavy chain	Slc3a2	5	4	2.518	67262.5	169387
Q8VCM7	Fibrinogen gamma chain	Fgg	42	13	2.49	2.23597e+06	5.56789e+06
Q8BLK3	Limbic system-associated membrane protein	Lsamp	2	1	2.172	20526.4	44584.5
P12960	Contactin-1	Cntn1	60	21	2.118	2.21302e+06	4.68662e+06
P01831	Thy-1 membrane glycoprotein	Thy1	10	2	2	481848	963457
E9Q557	Desmoplakin	Dsp	58	23	1.985	3.13225e+06	6.21707e+06
P10493	Nidogen-1	Nid1	2	2	1.956	120458	235661
Q9JIA1	Leucine-rich glioma-inactivated protein 1	Lgi1	4	2	1.953	90784.8	177286
P06837	Neuromodulin	Gap43	3	1	1.946	169194	329211
Q8R366	Immunoglobulin superfamily member 8	Igsf8	4	4	1.786	29484.4	52652.8
Q8VHW2	Voltage-dependent calcium channel gamma-8 subunit	Cacng8	8	2	1.777	105735	187893
P14231	Sodium/potassium-transporting ATPase subunit beta-2	Atp1b2	8	2	1.737	317047	550655
Q76MZ3	Serine/threonine-protein phosphatase 2A 65 kDa regulatory subunit A alpha isoform	Ppp2r1a	4	2	1.713	24222.1	41483.9
P00405	Cytochrome c oxidase subunit 2	Mtco2	15	3	1.708	580579	991662
P13595	Neural cell adhesion molecule 1	Ncam1	23	8	1.694	1.17032e+06	1.98303e+06
P07724	Albumin	Alb	45	12	1.692	1.56692e+06	2.65123e+06
Q91V14	Solute carrier family 12 member 5	Slc12a5	4	2	1.679	64623.2	108497
P31650	Sodium- and chloride-dependent GABA transporter 3	Slc6a11	3	1	1.679	66187	111120
P17897	Lysozyme C-1	Lyz1	4	1	1.671	237375	396571
Q71M36	Chondroitin sulfate proteoglycan 5	Cspg5	7	3	1.642	321008	527104
P21278	Guanine nucleotide-binding protein subunit alpha-11	Gna11	3	1	1.639	31555.7	51706.2
P17710	Hexokinase-1	Hk1	31	13	1.613	1.3677e+06	2.20609e+06
Q91VC3	Eukaryotic initiation factor 4A-III	Eif4a3	3	1	1.591	58460	93029.1
P02088	Hemoglobin subunit beta-1	Hbb-b1	28	7	1.58	2.07267e+06	3.27398e+06
Q99M71	Mammalian ependymin-related protein 1	Epdr1	3	1	1.575	53692.3	84543.3
Q02257	Junction plakoglobin	Jup	60	17	1.57	3.05657e+06	4.80032e+06
P60335	Poly(rC)-binding protein 1	Pcbp1	6	1	1.56	38529.8	60120.8
Q64332	Synapsin-2	Syn2	25	8	1.546	847951	1.3113e+06
O08749	Dihydrolipoyl dehydrogenase, mitochondrial	Dld	8	3	1.54	242469	373309
P62908	40S ribosomal protein S3	Rps3	1	1	1.533	69877.6	107149
Q9Z0E0	Neurochondrin	Ncdn	29	8	1.52	566384	860709
Q68FD5	Clathrin heavy chain 1	Cltc	104	27	1.499	3.51479e+06	5.26737e+06
P63082	V-type proton ATPase 16 kDa proteolipid subunit c	Atp6v0c	3	1	1.488	76028.8	113152
Q9R0P9	Ubiquitin carboxyl-terminal hydrolase isozyme L1	Uchl1	14	4	1.467	271558	398325
Q9DCX2	ATP synthase subunit d, mitochondrial	Atp5pd	6	2	1.459	46273.6	67513.1
Q8VEH3	ADP-ribosylation factor-like protein 8A	Arl8a	2	1	1.449	45317.4	65686.2
O08709	Peroxiredoxin-6	Prdx6	14	5	1.448	304134	440366
P53994	Ras-related protein Rab-2A	Rab2a	4	2	1.443	93927.2	135582
P67778	Prohibitin 1	Phb1	2	1	1.443	39846.9	57488.8
Q9JIS5	Synaptic vesicle glycoprotein 2A	Sv2a	3	2	1.428	17265.1	24646.1
P62259	14-3-3 protein epsilon	Ywhae	22	5	1.408	268825	378437
Q9CZ13	Cytochrome b-c1 complex subunit 1, mitochondrial	Uqcrc1	18	7	1.408	351738	495416
P97797	Tyrosine-protein phosphatase non-receptor type substrate 1	Sirpa	3	2	1.408	56711.4	79840.3
Q9D6F9	Tubulin beta-4A chain	Tubb4a	195	4	1.406	483618	679932
P10649	Glutathione S-transferase Mu 1	Gstm1	3	1	1.405	66366.2	93226.8
P39053	Dynamin-1	Dnm1	48	14	1.401	2.26385e+06	3.17261e+06
P51863	V-type proton ATPase subunit d 1	Atp6v0d1	6	2	1.399	256416	358799
Q61361	Brevican core protein	Bcan	4	2	1.381	555576	767513
P17426	AP-2 complex subunit alpha-1	Ap2a1	20	3	1.376	180595	248530
G5E829	Plasma membrane calcium-transporting ATPase 1	Atp2b1	24	5	1.368	645515	883049
Q62108	Disks large homolog 4	Dlg4	11	5	1.356	233460	316477
Q9D051	Pyruvate dehydrogenase E1 component subunit beta, mitochondrial	Pdhb	8	3	1.355	404742	548343
P31648	Sodium- and chloride-dependent GABA transporter 1	Slc6a1	3	1	1.355	142787	193414
P57722	Poly(rC)-binding protein 3	Pcbp3	7	1	1.355	95602.4	129551
P07356	Annexin A2	Anxa2	11	5	1.354	300845	407354
Q91V61	Sideroflexin-3	Sfxn3	3	1	1.353	126632	171312
Q60668	Heterogeneous nuclear ribonucleoprotein D0	Hnrnpd	5	2	1.346	149990	201899
Q8K2B3	Succinate dehydrogenase	Sdha	6	4	1.341	110815	148552
Q8BG39	Synaptic vesicle glycoprotein 2B	Sv2b	2	1	1.337	41017.8	54855.4
Q5M8N0	CB1 cannabinoid receptor-interacting protein 1	Cnrip1	5	2	1.329	133825	177840
O35098	Dihydropyrimidinase-related protein 4	Dpysl4	1	1	1.322	42672.8	56411.6
P70414	Sodium/calcium exchanger 1	Slc8a1	2	1	1.322	49131.6	64968.9
Q8BH59	Electrogenic aspartate/glutamate antiporter SLC25A12, mitochondrial	Slc25a12	8	3	1.32	268597	354592
P28661	Septin-4	Septin4	3	1	1.319	133337	175865
Q8K0U4	Heat shock 70 kDa protein 12A	Hspa12a	9	3	1.299	90208.6	117215
O88935	Synapsin-1	Syn1	27	9	1.298	1.29525e+06	1.68184e+06
Q8BGT8	Phytanoyl-CoA hydroxylase-interacting protein-like	Phyhipl	4	1	1.296	54584.3	70722.1
Q5SQX6	Cytoplasmic FMR1-interacting protein 2	Cyfip2	5	2	1.289	100619	129661
P16546	Spectrin alpha chain, non-erythrocytic 1	Sptan1	46	22	1.287	1.34264e+06	1.72769e+06
P14733	Lamin-B1	Lmnb1	1	1	1.287	22082.2	28424.2
Q62277	Synaptophysin	Syp	5	1	1.285	724482	931033
P56564	Excitatory amino acid transporter 1	Slc1a3	10	3	1.284	1.22044e+06	1.56723e+06
P18872	Guanine nucleotide-binding protein G(o) subunit alpha	Gnao1	33	8	1.282	2.76186e+06	3.53998e+06
P63318	Protein kinase C gamma type	Prkcg	20	5	1.278	441049	563656
P62823	Ras-related protein Rab-3C	Rab3c	2	1	1.277	87860.5	112180
Q9R1P3	Proteasome subunit beta type-2	Psmb2	1	1	1.276	38217.9	48761.2
P04925	Major prion protein	Prnp	1	1	1.275	23363.9	29796.9
Q99N28	Cell adhesion molecule 3	Cadm3	12	4	1.272	181928	231371
Q99LX0	Parkinson disease protein 7 homolog	Park7	2	1	1.271	40291.4	51203.1
Q8K1M6	Dynamin-1-like protein	Dnm1l	1	1	1.268	44167.5	56016.6
P97300	Neuroplastin	Nptn	15	4	1.266	578892	732685
P20029	Endoplasmic reticulum chaperone BiP	Hspa5	7	1	1.265	66210.6	83755.2
Q9Z2H5	Band 4.1-like protein 1	Epb41l1	2	1	1.261	51482.5	64915
P17427	AP-2 complex subunit alpha-2	Ap2a2	20	4	1.258	551283	693673
Q99KI0	Aconitate hydratase, mitochondrial	Aco2	42	12	1.254	1.87431e+06	2.3504e+06
Q7TMM9	Tubulin beta-2A chain	Tubb2a	286	2	1.253	3.59643e+07	4.50635e+07
P43006	Excitatory amino acid transporter 2	Slc1a2	36	9	1.252	6.14227e+06	7.68811e+06
Q02053	Ubiquitin-like modifier-activating enzyme 1	Uba1	1	1	1.252	49051.6	61397.5
P63168	Dynein light chain 1, cytoplasmic	Dynll1	3	1	1.249	106787	133354
P11798	Calcium/calmodulin-dependent protein kinase type II subunit alpha	Camk2a	64	10	1.246	6.7227e+06	8.37312e+06
O55131	Septin-7	Septin7	2	1	1.243	61914.6	76957.4
Q9DBJ1	Phosphoglycerate mutase 1	Pgam1	15	5	1.242	1.1865e+06	1.47417e+06
P02463	Collagen alpha-1(IV) chain	Col4a1	2	1	1.242	23883.9	29654.4
P68372	Tubulin beta-4B chain	Tubb4b	228	1	1.241	2.40541e+06	2.98468e+06
P52480	Pyruvate kinase PKM	Pkm	52	13	1.24	3.21063e+06	3.97976e+06
Q9QYC0	Alpha-adducin	Add1	5	3	1.239	154555	191465
P58252	Elongation factor 2	Eef2	9	3	1.237	157131	194358
Q91V41	Ras-related protein Rab-14	Rab14	1	1	1.236	71493.3	88339
P46460	Vesicle-fusing ATPase	Nsf	41	12	1.235	1.99793e+06	2.46673e+06
Q91VR2	ATP synthase subunit gamma, mitochondrial	Atp5f1c	5	2	1.235	129829	160373
Q9ERD7	Tubulin beta-3 chain	Tubb3	178	7	1.232	695461	856524
P84086	Complexin-2	Cplx2	1	1	1.232	30489.6	37568.4
P07901	Heat shock protein HSP 90-alpha	Hsp90aa1	18	3	1.23	340352	418641
Q9D6R2	Isocitrate dehydrogenase	Idh3a	8	3	1.229	326104	400650
P70349	Adenosine 5'-monophosphoramidase HINT1	Hint1	3	1	1.226	38984.5	47813.8
P14094	Sodium/potassium-transporting ATPase subunit beta-1	Atp1b1	32	6	1.216	2.89353e+06	3.51892e+06
P46096	Synaptotagmin-1	Syt1	33	10	1.216	1.97126e+06	2.39635e+06
Q9Z140	Copine-6	Cpne6	5	2	1.216	181013	220092
Q9R0Q6	Actin-related protein 2/3 complex subunit 1A	Arpc1a	3	1	1.216	122386	148848
O35737	Heterogeneous nuclear ribonucleoprotein H	Hnrnph1	2	1	1.211	71197.1	86224
P99024	Tubulin beta-5 chain	Tubb5	245	4	1.21	3.53436e+06	4.27749e+06
P61205	ADP-ribosylation factor 3	Arf3	17	5	1.208	991548	1.19752e+06
Q8CHH9	Septin-8	Septin8	7	3	1.2	318956	382643
P62631	Elongation factor 1-alpha 2	Eef1a2	46	3	1.199	497806	596734
P56391	Cytochrome c oxidase subunit 6B1	Cox6b1	5	1	1.199	83127.8	99692.1
O08599	Syntaxin-binding protein 1	Stxbp1	28	11	1.198	2.04849e+06	2.45443e+06
P68368	Tubulin alpha-4A chain	Tuba4a	181	5	1.185	2.59913e+06	3.08079e+06
Q9Z1G4	V-type proton ATPase 116 kDa subunit a 1	Atp6v0a1	16	6	1.183	282233	333831
P12382	ATP-dependent 6-phosphofructokinase, liver type	Pfkl	5	2	1.183	137429	162628
Q8CI94	Glycogen phosphorylase, brain form	Pygb	6	4	1.182	51538.9	60930.6
Q91XV3	Brain acid soluble protein 1	Basp1	10	3	1.181	703122	830389
P62814	V-type proton ATPase subunit B, brain isoform	Atp6v1b2	8	3	1.18	276962	326797
Q62261	Spectrin beta chain, non-erythrocytic 1	Sptbn1	9	5	1.178	286476	337441
Q8VEM8	Phosphate carrier protein, mitochondrial	Slc25a3	9	3	1.178	408412	481109
P03995	Glial fibrillary acidic protein	Gfap	75	5	1.176	2.00245e+07	2.35505e+07
P63085	Mitogen-activated protein kinase 1	Mapk1	6	2	1.176	181644	213545
Q9DB77	Cytochrome b-c1 complex subunit 2, mitochondrial	Uqcrc2	5	2	1.175	129838	152608
Q8CHC4	Synaptojanin-1	Synj1	4	3	1.174	145324	170570
Q9CWF2	Tubulin beta-2B chain	Tubb2b	277	1	1.17	392811	459501
P84091	AP-2 complex subunit mu	Ap2m1	6	2	1.166	283171	330195
P61027	Ras-related protein Rab-10	Rab10	9	2	1.164	217178	252896
P35802	Neuronal membrane glycoprotein M6-a	Gpm6a	9	2	1.163	678088	788319
P47757	F-actin-capping protein subunit beta	Capzb	8	2	1.16	301336	349417
P35486	Pyruvate dehydrogenase E1 component subunit alpha, somatic form, mitochondrial	Pdha1	52	14	1.159	3.2673e+06	3.7883e+06
P61982	14-3-3 protein gamma	Ywhag	26	3	1.159	673720	780986
Q9D023	Mitochondrial pyruvate carrier 2	Mpc2	1	1	1.159	37921.2	43945.5
Q6PIC6	Sodium/potassium-transporting ATPase subunit alpha-3	Atp1a3	210	24	1.157	1.90155e+07	2.19971e+07
P52760	2-iminobutanoate/2-iminopropanoate deaminase	Rida	3	1	1.156	133109	153872
P68510	14-3-3 protein eta	Ywhah	16	2	1.152	232163	267493
Q9DC70	NADH dehydrogenase	Ndufs7	3	1	1.152	85418.4	98429
Q8BMF4	Dihydrolipoyllysine-residue acetyltransferase component of pyruvate dehydrogenase complex, mitochondrial	Dlat	15	5	1.149	832768	956438
Q6PIE5	Sodium/potassium-transporting ATPase subunit alpha-2	Atp1a2	144	9	1.147	1.6002e+06	1.83468e+06
Q9DBG3	AP-2 complex subunit beta	Ap2b1	11	4	1.146	149210	170991
P60867	40S ribosomal protein S20	Rps20	3	2	1.145	59454.7	68077.8
P62137	Serine/threonine-protein phosphatase PP1-alpha catalytic subunit	Ppp1ca	2	2	1.145	69265.5	79307.8
Q5SWU9	Acetyl-CoA carboxylase 1	Acaca	179	49	1.139	1.13682e+07	1.29451e+07
P16858	Glyceraldehyde-3-phosphate dehydrogenase	Gapdh	76	13	1.139	1.18924e+07	1.35497e+07
P47754	F-actin-capping protein subunit alpha-2	Capza2	12	4	1.138	346977	394968
Q9WV92	Band 4.1-like protein 3	Epb41l3	6	4	1.135	86112.9	97737.2
P56135	ATP synthase subunit f, mitochondrial	Atp5mf	3	1	1.134	115319	130727
Q8K596	Sodium/calcium exchanger 2	Slc8a2	2	1	1.13	62691.8	70820.6
Q80XN0	D-beta-hydroxybutyrate dehydrogenase, mitochondrial	Bdh1	2	2	1.13	72080.3	81431.2
Q9R111	Guanine deaminase	Gda	3	2	1.13	127008	143524
P11276	Fibronectin	Fn1	10	4	1.129	240882	271995
Q9WUM5	Succinate--CoA ligase	Suclg1	3	2	1.128	141545	159630
O09061	Proteasome subunit beta type-1	Psmb1	1	1	1.125	48855.2	54944.9
P99029	Peroxiredoxin-5, mitochondrial	Prdx5	8	4	1.124	370318	416256
G3X9C2	F-box only protein 50	Nccrp1	2	1	1.123	30462.6	34199.8
P63011	Ras-related protein Rab-3A	Rab3a	19	4	1.12	2.92473e+06	3.27602e+06
Q9CQN1	Heat shock protein 75 kDa, mitochondrial	Trap1	3	1	1.118	677797	758081
Q9CZU6	Citrate synthase, mitochondrial	Cs	6	2	1.117	426870	476921
Q7TQD2	Tubulin polymerization-promoting protein	Tppp	9	3	1.113	692225	770744
Q8K0T0	Reticulon-1	Rtn1	4	1	1.112	144641	160770
Q6PAQ4	RNA exonuclease 4	Rexo4	1	1	1.109	16095.3	17849.2
Q61316	Heat shock 70 kDa protein 4	Hspa4	3	1	1.109	70143.7	77811
P68369	Tubulin alpha-1A chain	Tuba1a	204	8	1.103	3.69316e+07	4.07235e+07
P09411	Phosphoglycerate kinase 1	Pgk1	19	6	1.099	1.54058e+06	1.69348e+06
Q61553	Fascin	Fscn1	8	3	1.098	325505	357247
Q64436	Potassium-transporting ATPase alpha chain 1	Atp4a	27	1	1.097	634307	695773
P50396	Rab GDP dissociation inhibitor alpha	Gdi1	22	7	1.096	1.11719e+06	1.22445e+06
P14152	Malate dehydrogenase, cytoplasmic	Mdh1	18	6	1.096	1.99434e+06	2.18534e+06
P31324	cAMP-dependent protein kinase type II-beta regulatory subunit	Prkar2b	4	2	1.096	67641.7	74117.4
O08553	Dihydropyrimidinase-related protein 2	Dpysl2	97	14	1.095	5.03164e+06	5.50713e+06
Q62425	Cytochrome c oxidase subunit NDUFA4	Ndufa4	4	1	1.094	166113	181783
P62827	GTP-binding nuclear protein Ran	Ran	8	4	1.092	223883	244506
Q05920	Pyruvate carboxylase, mitochondrial	Pc	629	61	1.09	2.18963e+08	2.38655e+08
Q8K386	Ras-related protein Rab-15	Rab15	7	1	1.09	450045	490618
P48771	Cytochrome c oxidase subunit 7A2, mitochondrial	Cox7a2	3	1	1.087	46045.5	50059.8
P84075	Neuron-specific calcium-binding protein hippocalcin	Hpca	4	1	1.087	205758	223567
Q9D2G2	Dihydrolipoyllysine-residue succinyltransferase component of 2-oxoglutarate dehydrogenase complex, mitochondrial	Dlst	6	2	1.083	222527	241014
Q9DB20	ATP synthase subunit O, mitochondrial	Atp5po	7	2	1.082	210637	227991
P62874	Guanine nucleotide-binding protein G(I)/G(S)/G(T) subunit beta-1	Gnb1	22	3	1.076	1.40801e+06	1.515e+06
Q9CVB6	Actin-related protein 2/3 complex subunit 2	Arpc2	4	1	1.069	85958.7	91910.3
Q8QZT1	Acetyl-CoA acetyltransferase, mitochondrial	Acat1	4	3	1.068	448056	478501
P20357	Microtubule-associated protein 2	Map2	23	12	1.067	756171	806860
Q91V12	Cytosolic acyl coenzyme A thioester hydrolase	Acot7	6	3	1.067	367588	392205
P51881	ADP/ATP translocase 2	Slc25a5	60	5	1.065	1.77442e+06	1.88895e+06
P08228	Superoxide dismutase	Sod1	18	5	1.064	1.30385e+06	1.38735e+06
P48774	Glutathione S-transferase Mu 5	Gstm5	6	1	1.064	105862	112646
P50516	V-type proton ATPase catalytic subunit A	Atp6v1a	28	9	1.059	1.40787e+06	1.49035e+06
Q9CQV8	14-3-3 protein beta/alpha	Ywhab	22	1	1.059	177435	187908
P11499	Heat shock protein HSP 90-beta	Hsp90ab1	34	7	1.056	1.04584e+06	1.10465e+06
P21550	Beta-enolase	Eno3	19	1	1.054	252265	265949
Q9QYR6	Microtubule-associated protein 1A	Map1a	11	6	1.054	294722	310660
P48962	ADP/ATP translocase 1	Slc25a4	71	9	1.05	9.04358e+06	9.49559e+06
Q04447	Creatine kinase B-type	Ckb	39	11	1.05	5.25679e+06	5.51951e+06
P06151	L-lactate dehydrogenase A chain	Ldha	22	6	1.05	1.71944e+06	1.80609e+06
Q9EQF6	Dihydropyrimidinase-related protein 5	Dpysl5	15	6	1.049	160875	168828
P16125	L-lactate dehydrogenase B chain	Ldhb	23	7	1.043	3.32114e+06	3.46383e+06
C0HKE3	Histone H2A type 1-D	H2ac7	21	2	1.043	2.75789e+06	2.87655e+06
P47911	60S ribosomal protein L6	Rpl6	1	1	1.04	49769.1	51776.6
Q8BFR5	Elongation factor Tu, mitochondrial	Tufm	7	4	1.038	203494	211170
P50518	V-type proton ATPase subunit E 1	Atp6v1e1	7	2	1.038	389876	404701
P62897	Cytochrome c, somatic	Cycs	2	1	1.035	379297	392572
O89053	Coronin-1A	Coro1a	9	4	1.034	143332	148174
D3Z7P3	Glutaminase kidney isoform, mitochondrial	Gls	8	3	1.032	228638	235875
Q91WS0	CDGSH iron-sulfur domain-containing protein 1	Cisd1	7	2	1.02	164621	167931
Q9DCZ4	MICOS complex subunit Mic26	Apoo	4	2	1.02	141909	144781
Q60930	Voltage-dependent anion-selective channel protein 2	Vdac2	23	6	1.019	2.61012e+06	2.66078e+06
Q9CQR4	Acyl-coenzyme A thioesterase 13	Acot13	5	1	1.019	114181	116353
P63101	14-3-3 protein zeta/delta	Ywhaz	50	8	1.018	7.90528e+06	8.05048e+06
P17751	Triosephosphate isomerase	Tpi1	30	8	1.018	1.91261e+06	1.94765e+06
Q06185	ATP synthase subunit e, mitochondrial	Atp5me	2	1	1.018	96036.2	97809.4
P05202	Aspartate aminotransferase, mitochondrial	Got2	86	18	1.017	1.38368e+07	1.40786e+07
P18760	Cofilin-1	Cfl1	12	5	1.016	968570	983687
Q9D6M3	Mitochondrial glutamate carrier 1	Slc25a22	13	4	1.013	408278	413756
P05201	Aspartate aminotransferase, cytoplasmic	Got1	63	16	1.01	4.96391e+06	5.01569e+06
Q9R0P5	Destrin	Dstn	2	1	1.008	87761.8	88432.4
Q9CQQ7	ATP synthase F(0) complex subunit B1, mitochondrial	Atp5pb	6	2	1.003	274683	275626
Q8VDN2	Sodium/potassium-transporting ATPase subunit alpha-1	Atp1a1	128	7	0.999	883861	882686
Q03265	ATP synthase subunit alpha, mitochondrial	Atp5f1a	74	18	0.999	8.41902e+06	8.41117e+06
P10126	Elongation factor 1-alpha 1	Eef1a1	50	4	0.997	5.13041e+06	5.11693e+06
Q9D8N0	Elongation factor 1-gamma	Eef1g	1	1	0.997	77644.6	77420.1
P63017	Heat shock cognate 71 kDa protein	Hspa8	70	16	0.996	5.06597e+06	5.04779e+06
Q791V5	Mitochondrial carrier homolog 2	Mtch2	2	1	0.995	78311.3	77951.9
P63328	Protein phosphatase 3 catalytic subunit alpha	Ppp3ca	29	7	0.994	1.47864e+06	1.46917e+06
P08551	Neurofilament light polypeptide	Nefl	16	4	0.994	284366	282725
Q99PT1	Rho GDP-dissociation inhibitor 1	Arhgdia	15	3	0.985	835933	823588
Q921F2	TAR DNA-binding protein 43	Tardbp	2	1	0.985	166302	163863
P70296	Phosphatidylethanolamine-binding protein 1	Pebp1	3	1	0.985	138024	135945
O88342	WD repeat-containing protein 1	Wdr1	20	5	0.98	697098	682829
P08249	Malate dehydrogenase, mitochondrial	Mdh2	69	15	0.979	7.70015e+06	7.54166e+06
P97427	Dihydropyrimidinase-related protein 1	Crmp1	43	4	0.974	894309	871143
Q61792	LIM and SH3 domain protein 1	Lasp1	7	2	0.973	146817	142884
P27773	Protein disulfide-isomerase A3	Pdia3	1	1	0.972	43525	42302.6
Q9JJV2	Profilin-2	Pfn2	1	1	0.972	60282.3	58590.3
P00493	Hypoxanthine-guanine phosphoribosyltransferase	Hprt1	5	2	0.969	124060	120194
P15105	Glutamine synthetase	Glul	38	12	0.967	2.73132e+06	2.64209e+06
P08553	Neurofilament medium polypeptide	Nefm	34	10	0.966	1.48221e+06	1.4322e+06
P34884	Macrophage migration inhibitory factor	Mif	54	4	0.961	1.23203e+07	1.18445e+07
Q62188	Dihydropyrimidinase-related protein 3	Dpysl3	37	4	0.961	435724	418832
P63001	Ras-related C3 botulinum toxin substrate 1	Rac1	11	4	0.961	922985	886843
Q571F8	Glutaminase liver isoform, mitochondrial	Gls2	2	1	0.961	111689	107367
Q9QYG0	Protein NDRG2	Ndrg2	2	1	0.957	87844.9	84053
P27600	Guanine nucleotide-binding protein subunit alpha-12	Gna12	8	1	0.955	773131	738635
P24369	Peptidyl-prolyl cis-trans isomerase B	Ppib	2	2	0.951	159545	151784
P62806	Histone H4	H4c1	11	5	0.95	1.80626e+06	1.71626e+06
P20108	Thioredoxin-dependent peroxide reductase, mitochondrial	Prdx3	12	3	0.949	529981	502962
P61264	Syntaxin-1B	Stx1b	11	4	0.946	595901	563763
P62835	Ras-related protein Rap-1A	Rap1a	3	2	0.946	247308	233836
P40124	Adenylyl cyclase-associated protein 1	Cap1	3	1	0.944	64713.1	61064.5
P05063	Fructose-bisphosphate aldolase C	Aldoc	40	9	0.939	998878	937823
Q60931	Voltage-dependent anion-selective channel protein 3	Vdac3	20	7	0.937	3.02556e+06	2.836e+06
P61226	Ras-related protein Rap-2b	Rap2b	5	1	0.927	117318	108737
P28652	Calcium/calmodulin-dependent protein kinase type II subunit beta	Camk2b	45	4	0.925	286321	264982
P17182	Alpha-enolase	Eno1	34	8	0.921	3.31261e+06	3.05197e+06
Q91ZA3	Propionyl-CoA carboxylase alpha chain, mitochondrial	Pcca	578	51	0.92	2.11067e+08	1.94259e+08
P04370	Myelin basic protein	Mbp	15	3	0.919	2.67518e+06	2.45786e+06
O55125	Protein NipSnap homolog 1	Nipsnap1	3	1	0.918	51027.9	46842.7
Q9CPU0	Lactoylglutathione lyase	Glo1	6	2	0.917	520233	477304
P17183	Gamma-enolase	Eno2	34	6	0.904	1.22699e+06	1.10863e+06
Q61171	Peroxiredoxin-2	Prdx2	29	7	0.902	3.01217e+06	2.71623e+06
P56480	ATP synthase subunit beta, mitochondrial	Atp5f1b	51	11	0.899	3.52132e+06	3.16604e+06
P30275	Creatine kinase U-type, mitochondrial	Ckmt1	6	3	0.896	334454	299630
P60766	Cell division control protein 42 homolog	Cdc42	9	1	0.896	183547	164516
P60904	DnaJ homolog subfamily C member 5	Dnajc5	2	1	0.895	115317	103206
Q9CQ69	Cytochrome b-c1 complex subunit 8	Uqcrq	2	1	0.891	91264.2	81338.2
Q99MR8	Methylcrotonoyl-CoA carboxylase subunit alpha, mitochondrial	Mccc1	182	33	0.888	2.6045e+07	2.31301e+07
P63038	60 kDa heat shock protein, mitochondrial	Hspd1	4	2	0.886	78621.5	69634.9
P59999	Actin-related protein 2/3 complex subunit 4	Arpc4	9	3	0.883	445085	393226
Q99P72	Reticulon-4	Rtn4	2	1	0.883	82777.2	73080
P16330	2',3'-cyclic-nucleotide 3'-phosphodiesterase	Cnp	65	15	0.88	5.54447e+06	4.88125e+06
P35979	60S ribosomal protein L12	Rpl12	2	1	0.869	77156.5	67072.2
P0DP27	Calmodulin-2	Calm2	8	3	0.863	300375	259238
P40142	Transketolase	Tkt	21	6	0.856	1.01092e+06	865084
O55143	Sarcoplasmic/endoplasmic reticulum calcium ATPase 2	Atp2a2	8	3	0.851	326054	277364
P97315	Cysteine and glycine-rich protein 1	Csrp1	9	3	0.846	359164	303808
P43277	Histone H1.3	H1-3	7	1	0.842	180851	152334
Q60932	Voltage-dependent anion-selective channel protein 1	Vdac1	41	10	0.84	3.70838e+06	3.11508e+06
P60202	Myelin proteolipid protein	Plp1	32	5	0.84	7.84678e+06	6.59105e+06
Q9R1S8	Calpain-7	Capn7	2	1	0.838	309862	259607
Q9QY76	Vesicle-associated membrane protein-associated protein B	Vapb	4	2	0.825	100085	82534.1
P46660	Alpha-internexin	Ina	34	10	0.821	1.4526e+06	1.19253e+06
Q9JKC6	Cell cycle exit and neuronal differentiation protein 1	Cend1	4	2	0.82	223191	182941
P28271	Cytoplasmic aconitate hydratase	Aco1	47	16	0.816	3.99999e+06	3.26528e+06
Q91VD9	NADH-ubiquinone oxidoreductase 75 kDa subunit, mitochondrial	Ndufs1	15	3	0.814	377879	307599
P43274	Histone H1.4	H1-4	8	1	0.811	93856.4	76132.6
P10853	Histone H2B type 1-F/J/L	H2bc7	21	3	0.807	2.64557e+06	2.13616e+06
Q920N2	Biotin--protein ligase	Hlcs	10	4	0.802	66211.1	53130.4
Q9CR68	Cytochrome b-c1 complex subunit Rieske, mitochondrial	Uqcrfs1	7	2	0.796	298984	238024
Q6Q477	Plasma membrane calcium-transporting ATPase 4	Atp2b4	9	1	0.785	48631.6	38176.6
P19783	Cytochrome c oxidase subunit 4 isoform 1, mitochondrial	Cox4i1	18	5	0.779	831942	648251
P09671	Superoxide dismutase	Sod2	6	2	0.768	546862	419917
Q8C0M9	Isoaspartyl peptidase/L-asparaginase	Asrgl1	3	2	0.768	152097	116824
P48758	Carbonyl reductase	Cbr1	4	1	0.767	135085	103566
P51150	Ras-related protein Rab-7a	Rab7a	6	2	0.762	221875	168967
P01869	Ig gamma-1 chain C region, membrane-bound form	Ighg1	12	3	0.752	1.19874e+06	901382
Q01768	Nucleoside diphosphate kinase B	Nme2	12	3	0.751	623961	468661
Q9D3D9	ATP synthase subunit delta, mitochondrial	Atp5f1d	1	1	0.748	69053.4	51646
Q8VDQ8	NAD-dependent protein deacetylase sirtuin-2	Sirt2	6	4	0.734	413183	303172
Q60771	Claudin-11	Cldn11	2	1	0.728	344060	250466
P08113	Endoplasmin	Hsp90b1	7	1	0.724	123891	89656.4
Q61176	Arginase-1	Arg1	5	2	0.719	160892	115614
P97447	Four and a half LIM domains protein 1	Fhl1	3	2	0.702	297139	208709
P01837	Immunoglobulin kappa constant	Igkc	6	1	0.697	187798	130846
Q3TXX4	Vesicular glutamate transporter 1	Slc17a7	7	3	0.675	1.29341e+07	8.72795e+06
P35293	Ras-related protein Rab-18	Rab18	3	1	0.643	60327.5	38773
Q68FL4	Putative adenosylhomocysteinase 3	Ahcyl2	3	2	0.473	51057.7	24162.2
P0C0S6	Histone H2A.Z	H2az1	18	1	0.125	99438	12420.2
Q9QXA5	U6 snRNA-associated Sm-like protein LSm4	Lsm4	2	1	0.036	907407	32351.4

## Sheet: S3-7. 1 min 2.4 W-cm2, all
UniProt ID	Protein	Gene	# PSMs	# unique peptides	Fold change: Light (+) vs. Light (–)	Abundances (Grouped): Light(–)	Abundances (Grouped): Light(+)
B9EKR1	Receptor-type tyrosine-protein phosphatase zeta	Ptprz1	7	2	22.045	19446.1	428689
P10493	Nidogen-1	Nid1	9	6	15.644	150251	2.3505e+06
Q9Z218	Dipeptidyl aminopeptidase-like protein 6	Dpp6	8	5	14.847	92755	1.37713e+06
Q9Z2W9	Glutamate receptor 3	Gria3	28	10	14.803	178734	2.64576e+06
Q60625	Intercellular adhesion molecule 5	Icam5	26	10	14.547	213899	3.11167e+06
Q69ZK9	Neuroligin-2	Nlgn2	4	1	13.803	5403.2	74578.4
P35438	Glutamate receptor ionotropic, NMDA 1	Grin1	4	3	13.401	82703.7	1.10835e+06
Q810U4	Neuronal cell adhesion molecule	Nrcam	10	6	10.595	134295	1.4228e+06
Q8BYI9	Tenascin-R	Tnr	45	21	10.432	631154	6.58445e+06
P23818	Glutamate receptor 1	Gria1	19	8	10.233	154356	1.57948e+06
P23819	Glutamate receptor 2	Gria2	25	11	10.189	400665	4.08257e+06
O35136	Neural cell adhesion molecule 2	Ncam2	5	4	10.141	73027.7	740579
Q9D1T0	Leucine-rich repeat and immunoglobulin-like domain-containing nogo receptor-interacting protein 1	Lingo1	7	3	9.761	69466.4	678040
P04925	Major prion protein	Prnp	2	1	8.516	7155.29	60937
Q8R366	Immunoglobulin superfamily member 8	Igsf8	11	4	8.42	52173.2	439316
Q61885	Myelin-oligodendrocyte glycoprotein	Mog	5	2	7.827	48696.7	381154
O88998	Noelin	Olfm1	2	1	7.709	45294.7	349182
Q810U3	Neurofascin	Nfasc	23	13	7.216	256467	1.85076e+06
Q05793	Basement membrane-specific heparan sulfate proteoglycan core protein	Hspg2	12	8	6.96	49393	343776
P10852	4F2 cell-surface antigen heavy chain	Slc3a2	9	6	6.831	90702.6	619627
Q9QUP5	Hyaluronan and proteoglycan link protein 1	Hapln1	5	3	6.778	91382.3	619433
P55066	Neurocan core protein	Ncan	6	4	6.181	47159.6	291505
Q9QYS2	Metabotropic glutamate receptor 3	Grm3	1	1	6.081	8658.14	52648.8
Q8BLK3	Limbic system-associated membrane protein	Lsamp	9	4	6.038	187286	1.13084e+06
O88507	Ciliary neurotrophic factor receptor subunit alpha	Cntfr	3	1	5.921	15858.9	93903.1
Q62059	Versican core protein	Vcan	5	3	5.852	59580.2	348651
Q8BYM5	Neuroligin-3	Nlgn3	9	4	5.256	22806.2	119861
Q8VHW2	Voltage-dependent calcium channel gamma-8 subunit	Cacng8	11	3	5.235	107086	560646
O54991	Contactin-associated protein 1	Cntnap1	2	2	5.21	15167.4	79016.7
P17897	Lysozyme C-1	Lyz1	7	1	5.072	193895	983423
P12960	Contactin-1	Cntn1	82	28	5.006	2.25923e+06	1.13098e+07
P02468	Laminin subunit gamma-1	Lamc1	2	1	4.862	19982.1	97159.7
Q8R464	Cell adhesion molecule 4	Cadm4	9	5	4.687	89624.8	420048
P07724	Albumin	Alb	60	20	4.656	1.94879e+06	9.07267e+06
Q63912	Oligodendrocyte-myelin glycoprotein	Omg	3	2	4.579	47312.4	216649
Q61292	Laminin subunit beta-2	Lamb2	22	13	4.508	186542	840890
Q9JIA1	Leucine-rich glioma-inactivated protein 1	Lgi1	6	2	4.447	75302.1	334904
P01831	Thy-1 membrane glycoprotein	Thy1	11	3	4.421	424244	1.87553e+06
P14231	Sodium/potassium-transporting ATPase subunit beta-2	Atp1b2	10	2	4.174	258973	1.08092e+06
Q9QZF2	Glypican-1	Gpc1	2	2	4.152	35816.8	148712
P20917	Myelin-associated glycoprotein	Mag	9	5	4.099	115314	472630
Q8BMF4	Dihydrolipoyllysine-residue acetyltransferase component of pyruvate dehydrogenase complex, mitochondrial	Dlat	17	5	4.042	605646	2.44821e+06
P31650	Sodium- and chloride-dependent GABA transporter 3	Slc6a11	4	1	4.001	54063.6	216286
Q9CPW0	Contactin-associated protein-like 2	Cntnap2	11	7	3.939	106706	420310
Q8K377	Leucine-rich repeat transmembrane neuronal protein 1	Lrrtm1	2	1	3.801	16326.3	62055.3
O88343	Electrogenic sodium bicarbonate cotransporter 1	Slc4a4	4	2	3.782	53025	200540
Q9R1V6	Disintegrin and metalloproteinase domain-containing protein 22	Adam22	2	1	3.706	20105.4	74509.7
A2ASQ1	Agrin	Agrn	2	2	3.679	36523.8	134368
Q3TXX4	Vesicular glutamate transporter 1	Slc17a7	6	2	3.642	148565	541073
P97797	Tyrosine-protein phosphatase non-receptor type substrate 1	Sirpa	4	4	3.631	140061	508493
P06837	Neuromodulin	Gap43	4	1	3.538	138203	488908
P13595	Neural cell adhesion molecule 1	Ncam1	35	12	3.419	1.04241e+06	3.56383e+06
Q80UG2	Plexin-A4	Plxna4	1	1	3.36	18960.1	63710.9
P02463	Collagen alpha-1(IV) chain	Col4a1	3	2	3.334	14965.1	49888
Q99PJ0	Neurotrimin	Ntm	1	1	2.97	19521.8	57979.1
Q99N28	Cell adhesion molecule 3	Cadm3	14	4	2.905	180410	524167
Q05816	Fatty acid-binding protein 5	Fabp5	3	1	2.778	79982.8	222200
P02088	Hemoglobin subunit beta-1	Hbb-b1	26	7	2.769	1.7512e+06	4.84913e+06
Q9JIS5	Synaptic vesicle glycoprotein 2A	Sv2a	4	2	2.766	14102.6	39001.9
Q8BGN3	Glycerophosphocholine cholinephosphodiesterase ENPP6	Enpp6	2	1	2.72	27234.7	74085.7
Q6NXK7	Inactive dipeptidyl peptidase 10	Dpp10	4	3	2.71	37104.9	100538
Q68ED2	Metabotropic glutamate receptor 7	Grm7	2	1	2.701	16680.4	45048.4
O08749	Dihydrolipoyl dehydrogenase, mitochondrial	Dld	4	2	2.604	74760.3	194639
Q61361	Brevican core protein	Bcan	11	5	2.496	527866	1.31774e+06
Q8BLQ9	Cell adhesion molecule 2	Cadm2	2	1	2.478	26990.5	66875.5
Q61838	Pregnancy zone protein	Pzp	1	1	2.381	28377.8	67578.1
Q9Z0E0	Neurochondrin	Ncdn	20	5	2.313	286268	662089
Q8BGT8	Phytanoyl-CoA hydroxylase-interacting protein-like	Phyhipl	5	1	2.269	118758	269449
P17751	Triosephosphate isomerase	Tpi1	41	12	2.265	2.09885e+06	4.75292e+06
P14733	Lamin-B1	Lmnb1	1	1	2.263	11080.8	25071
P97300	Neuroplastin	Nptn	14	5	2.2	516039	1.13529e+06
Q91V41	Ras-related protein Rab-14	Rab14	2	1	2.169	58398	126685
P31648	Sodium- and chloride-dependent GABA transporter 1	Slc6a1	5	1	2.095	116633	244356
Q8VCM7	Fibrinogen gamma chain	Fgg	31	10	2.092	1.94246e+06	4.06414e+06
Q9CQD1	Ras-related protein Rab-5A	Rab5a	2	1	2.018	25561.8	51584.4
Q91V14	Solute carrier family 12 member 5	Slc12a5	6	3	2.016	60223.3	121411
O55042	Alpha-synuclein	Snca	1	1	1.977	40910.7	80875.1
P20029	Endoplasmic reticulum chaperone BiP	Hspa5	11	2	1.967	87429.8	172015
P32037	Solute carrier family 2, facilitated glucose transporter member 3	Slc2a3	4	2	1.953	128972	251895
O35316	Sodium- and chloride-dependent taurine transporter	Slc6a6	1	1	1.951	63160.3	123229
Q8VEH3	ADP-ribosylation factor-like protein 8A	Arl8a	2	1	1.943	37016.7	71921.9
P62908	40S ribosomal protein S3	Rps3	2	1	1.923	57078.1	109754
P63082	V-type proton ATPase 16 kDa proteolipid subunit c	Atp6v0c	3	1	1.916	62102.7	119014
P62259	14-3-3 protein epsilon	Ywhae	22	5	1.911	246448	470949
P43006	Excitatory amino acid transporter 2	Slc1a2	36	10	1.906	4.90001e+06	9.34165e+06
P31938	Dual specificity mitogen-activated protein kinase kinase 1	Map2k1	4	1	1.898	62784.3	119155
P14115	60S ribosomal protein L27a	Rpl27a	1	1	1.893	28229.7	53440.5
Q99JY9	Actin-related protein 3	Actr3	3	3	1.893	19966	37787.2
P70349	Adenosine 5'-monophosphoramidase HINT1	Hint1	3	1	1.874	31843.8	59675.6
Q99LX0	Parkinson disease protein 7 homolog	Park7	1	1	1.872	32911.3	61606.8
Q9DC69	NADH dehydrogenase	Ndufa9	3	2	1.862	26848.2	49992
P11276	Fibronectin	Fn1	10	3	1.852	150753	279250
P84091	AP-2 complex subunit mu	Ap2m1	8	4	1.848	419194	774842
Q3UNH4	G protein-regulated inducer of neurite outgrowth 1	Gprin1	2	2	1.845	44570.2	82214.1
P04370	Myelin basic protein	Mbp	22	5	1.834	2.27774e+06	4.17811e+06
O88342	WD repeat-containing protein 1	Wdr1	20	7	1.833	585476	1.07315e+06
Q8CI94	Glycogen phosphorylase, brain form	Pygb	2	2	1.826	57948	105798
Q9DCX2	ATP synthase subunit d, mitochondrial	Atp5pd	6	2	1.822	86827.6	158240
P68510	14-3-3 protein eta	Ywhah	15	3	1.812	113417	205474
Q9CQE1	Protein NipSnap homolog 3B	Nipsnap3b	3	1	1.81	71943.9	130211
Q9R0Q6	Actin-related protein 2/3 complex subunit 1A	Arpc1a	2	1	1.791	99968.4	179020
P38647	Stress-70 protein, mitochondrial	Hspa9	7	3	1.785	182610	325942
P63085	Mitogen-activated protein kinase 1	Mapk1	11	3	1.779	219543	390524
Q8BI08	Protein MAL2	Mal2	1	1	1.765	58030.5	102426
P53810	Phosphatidylinositol transfer protein alpha isoform	Pitpna	2	1	1.763	52411.7	92423.8
Q9R0P9	Ubiquitin carboxyl-terminal hydrolase isozyme L1	Uchl1	15	7	1.755	441481	774799
C0HKE3	Histone H2A type 1-D	H2ac7	24	2	1.746	2.25273e+06	3.93277e+06
P05132	cAMP-dependent protein kinase catalytic subunit alpha	Prkaca	2	1	1.741	81677.3	142216
P70414	Sodium/calcium exchanger 1	Slc8a1	2	1	1.741	40132.2	69851.1
Q61553	Fascin	Fscn1	10	3	1.738	265882	461989
P61982	14-3-3 protein gamma	Ywhag	23	3	1.734	550315	954107
Q91XV3	Brain acid soluble protein 1	Basp1	8	3	1.715	574332	985120
P61226	Ras-related protein Rap-2b	Rap2b	5	1	1.711	95828.9	163971
P62823	Ras-related protein Rab-3C	Rab3c	7	2	1.704	114690	195406
Q9D6M3	Mitochondrial glutamate carrier 1	Slc25a22	16	4	1.692	535653	906230
P61205	ADP-ribosylation factor 3	Arf3	15	5	1.691	713134	1.20624e+06
P17710	Hexokinase-1	Hk1	31	11	1.675	1.10297e+06	1.84694e+06
P50516	V-type proton ATPase catalytic subunit A	Atp6v1a	22	8	1.67	902806	1.50777e+06
P20108	Thioredoxin-dependent peroxide reductase, mitochondrial	Prdx3	15	3	1.666	432905	721248
P14094	Sodium/potassium-transporting ATPase subunit beta-1	Atp1b1	36	8	1.662	3.59536e+06	5.97479e+06
Q9Z1G4	V-type proton ATPase 116 kDa subunit a 1	Atp6v0a1	14	4	1.657	265525	439983
Q61792	LIM and SH3 domain protein 1	Lasp1	11	3	1.657	232699	385548
Q62108	Disks large homolog 4	Dlg4	8	4	1.652	142830	236000
Q8VEM8	Phosphate carrier protein, mitochondrial	Slc25a3	9	3	1.652	333603	551044
Q8C0M9	Isoaspartyl peptidase/L-asparaginase	Asrgl1	6	3	1.64	124237	203808
P46096	Synaptotagmin-1	Syt1	40	12	1.638	1.22287e+06	2.00338e+06
Q8CHH9	Septin-8	Septin8	6	2	1.637	294882	482585
P70296	Phosphatidylethanolamine-binding protein 1	Pebp1	1	1	1.625	112743	183222
Q9QYR6	Microtubule-associated protein 1A	Map1a	15	7	1.615	221187	357148
P20357	Microtubule-associated protein 2	Map2	23	9	1.614	509440	822082
Q8K2B3	Succinate dehydrogenase	Sdha	1	1	1.607	40936.8	65783.6
Q62261	Spectrin beta chain, non-erythrocytic 1	Sptbn1	12	8	1.607	212094	340731
P63001	Ras-related C3 botulinum toxin substrate 1	Rac1	10	4	1.596	753923	1.20336e+06
Q9CWF2	Tubulin beta-2B chain	Tubb2b	290	2	1.587	349487	554679
P62806	Histone H4	H4c1	11	5	1.579	1.50733e+06	2.38006e+06
Q9ERD7	Tubulin beta-3 chain	Tubb3	175	6	1.578	806973	1.27372e+06
P62897	Cytochrome c, somatic	Cycs	2	1	1.578	309822	488988
Q9R0Y5	Adenylate kinase isoenzyme 1	Ak1	1	1	1.578	26568	41927.7
Q71M36	Chondroitin sulfate proteoglycan 5	Cspg5	4	2	1.577	227215	358264
Q9D6F9	Tubulin beta-4A chain	Tubb4a	198	3	1.574	355946	560226
Q9R111	Guanine deaminase	Gda	6	2	1.574	103744	163270
P62743	AP-2 complex subunit sigma	Ap2s1	3	1	1.568	119254	186972
Q9WUM5	Succinate--CoA ligase	Suclg1	6	4	1.567	172759	270658
Q6VNS1	NT-3 growth factor receptor	Ntrk3	2	1	1.564	36447	57010.6
P16858	Glyceraldehyde-3-phosphate dehydrogenase	Gapdh	80	15	1.564	1.10062e+07	1.72141e+07
Q62277	Synaptophysin	Syp	6	1	1.564	591779	925469
P58252	Elongation factor 2	Eef2	8	2	1.564	128349	200684
P99024	Tubulin beta-5 chain	Tubb5	252	5	1.562	2.92276e+06	4.56398e+06
P35279	Ras-related protein Rab-6A	Rab6a	2	1	1.562	59888	93515.7
Q61598	Rab GDP dissociation inhibitor beta	Gdi2	11	1	1.559	68209.4	106341
Q7TSJ2	Microtubule-associated protein 6	Map6	5	2	1.559	23062.2	35950.3
P16546	Spectrin alpha chain, non-erythrocytic 1	Sptan1	34	16	1.556	767559	1.19463e+06
P10126	Elongation factor 1-alpha 1	Eef1a1	47	4	1.554	3.77024e+06	5.86023e+06
Q9QYG0	Protein NDRG2	Ndrg2	3	1	1.553	71754.5	111431
P63011	Ras-related protein Rab-3A	Rab3a	23	4	1.552	2.4896e+06	3.86299e+06
P18872	Guanine nucleotide-binding protein G(o) subunit alpha	Gnao1	34	8	1.55	2.0002e+06	3.10068e+06
Q64436	Potassium-transporting ATPase alpha chain 1	Atp4a	29	3	1.547	518122	801774
P61027	Ras-related protein Rab-10	Rab10	8	2	1.546	177398	274184
Q8CHC4	Synaptojanin-1	Synj1	4	2	1.544	52189	80572.8
G5E829	Plasma membrane calcium-transporting ATPase 1	Atp2b1	28	6	1.543	632689	976384
Q61171	Peroxiredoxin-2	Prdx2	29	9	1.54	2.735e+06	4.2106e+06
Q9DBG3	AP-2 complex subunit beta	Ap2b1	8	3	1.538	66233.3	101834
P06151	L-lactate dehydrogenase A chain	Ldha	19	5	1.535	1.14249e+06	1.75391e+06
P46460	Vesicle-fusing ATPase	Nsf	38	13	1.529	1.65911e+06	2.53701e+06
O08709	Peroxiredoxin-6	Prdx6	16	6	1.528	215158	328718
Q7TMM9	Tubulin beta-2A chain	Tubb2a	297	2	1.527	2.92186e+07	4.46283e+07
P62827	GTP-binding nuclear protein Ran	Ran	8	4	1.52	182874	277985
P63101	14-3-3 protein zeta/delta	Ywhaz	49	7	1.515	6.69275e+06	1.01409e+07
Q9DBJ1	Phosphoglycerate mutase 1	Pgam1	16	4	1.514	955161	1.44652e+06
Q91XM9	Disks large homolog 2	Dlg2	1	1	1.512	21989.6	33238.8
Q01768	Nucleoside diphosphate kinase B	Nme2	17	5	1.506	874377	1.31653e+06
Q8CAQ8	MICOS complex subunit Mic60	Immt	1	1	1.505	31988.8	48155.2
Q60930	Voltage-dependent anion-selective channel protein 2	Vdac2	26	8	1.498	2.25486e+06	3.37825e+06
Q5M8N0	CB1 cannabinoid receptor-interacting protein 1	Cnrip1	5	3	1.497	134111	200743
P51881	ADP/ATP translocase 2	Slc25a5	48	4	1.496	1.34276e+06	2.00941e+06
Q8VDN2	Sodium/potassium-transporting ATPase subunit alpha-1	Atp1a1	122	7	1.495	721965	1.07955e+06
Q9D6R2	Isocitrate dehydrogenase	Idh3a	8	2	1.494	172451	257613
Q99KI0	Aconitate hydratase, mitochondrial	Aco2	35	10	1.493	1.39916e+06	2.08901e+06
Q9JJV2	Profilin-2	Pfn2	1	1	1.492	48403.8	72219.2
P08228	Superoxide dismutase	Sod1	18	5	1.491	1.06503e+06	1.58834e+06
Q8K0T0	Reticulon-1	Rtn1	6	2	1.491	118147	176115
P43274	Histone H1.4	H1-4	5	1	1.487	76664.8	114022
P47754	F-actin-capping protein subunit alpha-2	Capza2	7	3	1.483	200042	296730
Q9DCZ4	MICOS complex subunit Mic26	Apoo	4	2	1.482	115915	171737
O55131	Septin-7	Septin7	5	2	1.476	80118.1	118263
Q9CZ13	Cytochrome b-c1 complex subunit 1, mitochondrial	Uqcrc1	12	4	1.476	217627	321117
Q64332	Synapsin-2	Syn2	25	10	1.473	1.16124e+06	1.71083e+06
P28661	Septin-4	Septin4	3	1	1.473	108914	160432
Q91VC3	Eukaryotic initiation factor 4A-III	Eif4a3	3	1	1.473	47751.9	70327.8
P18760	Cofilin-1	Cfl1	16	5	1.467	791158	1.16077e+06
P27773	Protein disulfide-isomerase A3	Pdia3	2	2	1.466	60501.2	88721.5
Q9R0P5	Destrin	Dstn	2	1	1.466	71686.6	105109
Q6PAQ4	RNA exonuclease 4	Rexo4	1	1	1.466	13147.1	19275.9
Q5SQX6	Cytoplasmic FMR1-interacting protein 2	Cyfip2	5	2	1.461	82188.4	120084
P39053	Dynamin-1	Dnm1	38	10	1.457	1.63614e+06	2.38426e+06
Q9CPU0	Lactoylglutathione lyase	Glo1	4	1	1.455	257300	374433
Q8R191	Synaptogyrin-3	Syngr3	2	1	1.452	201324	292246
P57722	Poly(rC)-binding protein 3	Pcbp3	6	2	1.448	78091	113076
Q9CQR4	Acyl-coenzyme A thioesterase 13	Acot13	5	1	1.447	93266.7	134953
Q91V12	Cytosolic acyl coenzyme A thioester hydrolase	Acot7	9	5	1.442	327422	472215
O35098	Dihydropyrimidinase-related protein 4	Dpysl4	1	1	1.439	34856.5	50152
P63038	60 kDa heat shock protein, mitochondrial	Hspd1	6	4	1.432	154917	221784
O08599	Syntaxin-binding protein 1	Stxbp1	27	11	1.431	1.74466e+06	2.49672e+06
Q7TQD2	Tubulin polymerization-promoting protein	Tppp	10	4	1.43	620892	888033
Q9CQN1	Heat shock protein 75 kDa, mitochondrial	Trap1	3	1	1.425	553646	789058
P63017	Heat shock cognate 71 kDa protein	Hspa8	76	20	1.425	5.30788e+06	7.56356e+06
Q9R1S8	Calpain-7	Capn7	4	1	1.425	253105	360565
Q8BFR5	Elongation factor Tu, mitochondrial	Tufm	9	3	1.424	141984	202234
P31324	cAMP-dependent protein kinase type II-beta regulatory subunit	Prkar2b	7	3	1.424	278074	395930
P53994	Ras-related protein Rab-2A	Rab2a	7	2	1.423	44895.3	63874.4
P97427	Dihydropyrimidinase-related protein 1	Crmp1	39	4	1.421	730499	1.03825e+06
Q6PIC6	Sodium/potassium-transporting ATPase subunit alpha-3	Atp1a3	205	24	1.419	1.53048e+07	2.17163e+07
Q99PT1	Rho GDP-dissociation inhibitor 1	Arhgdia	16	4	1.418	682815	968526
P16125	L-lactate dehydrogenase B chain	Ldhb	21	7	1.418	2.71281e+06	3.84612e+06
P52480	Pyruvate kinase PKM	Pkm	57	16	1.415	2.90259e+06	4.10796e+06
Q03265	ATP synthase subunit alpha, mitochondrial	Atp5f1a	77	20	1.412	6.55921e+06	9.26483e+06
Q9DB77	Cytochrome b-c1 complex subunit 2, mitochondrial	Uqcrc2	1	1	1.412	106055	149772
P48962	ADP/ATP translocase 1	Slc25a4	61	7	1.411	7.12402e+06	1.0051e+07
P62835	Ras-related protein Rap-1A	Rap1a	3	2	1.409	50933.8	71765.2
P40124	Adenylyl cyclase-associated protein 1	Cap1	3	1	1.409	52859.7	74473.6
P11499	Heat shock protein HSP 90-beta	Hsp90ab1	40	8	1.406	1.45328e+06	2.04353e+06
P47857	ATP-dependent 6-phosphofructokinase, muscle type	Pfkm	6	1	1.399	119314	166977
P57780	Alpha-actinin-4	Actn4	1	1	1.399	30327	42434.4
Q60668	Heterogeneous nuclear ribonucleoprotein D0	Hnrnpd	3	2	1.398	65957.3	92230.1
P34884	Macrophage migration inhibitory factor	Mif	54	4	1.398	1.00636e+07	1.40693e+07
P99029	Peroxiredoxin-5, mitochondrial	Prdx5	7	3	1.397	302487	422489
Q9CZU6	Citrate synthase, mitochondrial	Cs	9	3	1.39	443454	616542
Q68FD5	Clathrin heavy chain 1	Cltc	92	22	1.39	2.61884e+06	3.63985e+06
Q8BH59	Electrogenic aspartate/glutamate antiporter SLC25A12, mitochondrial	Slc25a12	6	3	1.387	76090.1	105572
P10853	Histone H2B type 1-F/J/L	H2bc7	19	3	1.387	2.16098e+06	2.99701e+06
P24369	Peptidyl-prolyl cis-trans isomerase B	Ppib	2	1	1.384	33700.4	46641.3
P35802	Neuronal membrane glycoprotein M6-a	Gpm6a	9	3	1.38	569279	785629
P67778	Prohibitin 1	Phb1	1	1	1.38	32548.2	44903.6
P11798	Calcium/calmodulin-dependent protein kinase type II subunit alpha	Camk2a	62	8	1.377	5.35777e+06	7.37892e+06
Q8K596	Sodium/calcium exchanger 2	Slc8a2	4	2	1.376	24573.3	33820.5
Q8BZ98	Dynamin-3	Dnm3	10	1	1.374	153337	210749
P17426	AP-2 complex subunit alpha-1	Ap2a1	16	3	1.373	230132	316042
D3Z7P3	Glutaminase kidney isoform, mitochondrial	Gls	9	4	1.367	314653	429980
P30275	Creatine kinase U-type, mitochondrial	Ckmt1	11	5	1.365	394767	538921
Q91VR2	ATP synthase subunit gamma, mitochondrial	Atp5f1c	3	2	1.361	106049	144340
O89053	Coronin-1A	Coro1a	9	5	1.36	117078	159275
O08553	Dihydropyrimidinase-related protein 2	Dpysl2	85	14	1.359	4.02363e+06	5.46764e+06
O88935	Synapsin-1	Syn1	19	7	1.355	734405	995310
P63328	Protein phosphatase 3 catalytic subunit alpha	Ppp3ca	32	10	1.353	1.75813e+06	2.37903e+06
Q791V5	Mitochondrial carrier homolog 2	Mtch2	3	2	1.353	124321	168206
P62245	40S ribosomal protein S15a	Rps15a	2	1	1.353	41614.5	56302.8
Q9EQF6	Dihydropyrimidinase-related protein 5	Dpysl5	14	5	1.351	159323	215254
Q9JKC6	Cell cycle exit and neuronal differentiation protein 1	Cend1	4	2	1.35	182309	246126
P47757	F-actin-capping protein subunit beta	Capzb	10	3	1.348	287769	387995
P07901	Heat shock protein HSP 90-alpha	Hsp90aa1	20	4	1.348	316340	426417
Q60771	Claudin-11	Cldn11	2	1	1.348	281038	378802
P60766	Cell division control protein 42 homolog	Cdc42	11	1	1.337	149927	200487
P63318	Protein kinase C gamma type	Prkcg	20	6	1.334	350248	467221
P62631	Elongation factor 1-alpha 2	Eef1a2	45	3	1.334	406623	542264
P15105	Glutamine synthetase	Glul	35	8	1.33	1.8472e+06	2.45726e+06
P56135	ATP synthase subunit f, mitochondrial	Atp5mf	3	1	1.33	94196.2	125242
Q9D051	Pyruvate dehydrogenase E1 component subunit beta, mitochondrial	Pdhb	5	3	1.326	330606	438285
Q9WV92	Band 4.1-like protein 3	Epb41l3	5	4	1.325	70339.7	93208.9
P09411	Phosphoglycerate kinase 1	Pgk1	18	5	1.324	1.26187e+06	1.67107e+06
P62814	V-type proton ATPase subunit B, brain isoform	Atp6v1b2	8	4	1.32	207007	273200
P84075	Neuron-specific calcium-binding protein hippocalcin	Hpca	4	1	1.318	168070	221481
P56564	Excitatory amino acid transporter 1	Slc1a3	9	3	1.316	996894	1.31159e+06
Q9D2G2	Dihydrolipoyllysine-residue succinyltransferase component of 2-oxoglutarate dehydrogenase complex, mitochondrial	Dlst	3	2	1.314	99500.9	130790
P51863	V-type proton ATPase subunit d 1	Atp6v0d1	3	2	1.314	61791.7	81217.1
P60202	Myelin proteolipid protein	Plp1	28	5	1.305	6.40949e+06	8.36207e+06
Q9ES97	Reticulon-3	Rtn3	2	1	1.303	71551.4	93250.4
Q91WS0	CDGSH iron-sulfur domain-containing protein 1	Cisd1	4	2	1.301	98044.4	127541
P08551	Neurofilament light polypeptide	Nefl	15	4	1.298	232279	301603
P10649	Glutathione S-transferase Mu 1	Gstm1	3	2	1.298	54209.9	70362.3
Q9CVB6	Actin-related protein 2/3 complex subunit 2	Arpc2	3	1	1.294	70213.7	90823.7
P35486	Pyruvate dehydrogenase E1 component subunit alpha, somatic form, mitochondrial	Pdha1	49	14	1.29	2.16748e+06	2.796e+06
P00493	Hypoxanthine-guanine phosphoribosyltransferase	Hprt1	7	3	1.29	299134	385832
P27600	Guanine nucleotide-binding protein subunit alpha-12	Gna12	8	1	1.288	631517	813684
P62874	Guanine nucleotide-binding protein G(I)/G(S)/G(T) subunit beta-1	Gnb1	18	3	1.278	1.09869e+06	1.40407e+06
Q6PIE5	Sodium/potassium-transporting ATPase subunit alpha-2	Atp1a2	145	10	1.277	1.17739e+06	1.50394e+06
P68372	Tubulin beta-4B chain	Tubb4b	236	1	1.277	1.96481e+06	2.50827e+06
Q9JLM8	Serine/threonine-protein kinase DCLK1	Dclk1	1	1	1.276	19881.5	25364.8
P61264	Syntaxin-1B	Stx1b	10	4	1.27	486750	618390
P17182	Alpha-enolase	Eno1	42	11	1.269	3.18833e+06	4.04541e+06
P08249	Malate dehydrogenase, mitochondrial	Mdh2	63	15	1.269	6.24975e+06	7.92909e+06
P21550	Beta-enolase	Eno3	18	1	1.266	206058	260879
P50396	Rab GDP dissociation inhibitor alpha	Gdi1	18	3	1.256	510903	641688
Q9DB20	ATP synthase subunit O, mitochondrial	Atp5po	8	3	1.256	172055	216072
Q9Z140	Copine-6	Cpne6	4	2	1.255	147857	185552
P16330	2',3'-cyclic-nucleotide 3'-phosphodiesterase	Cnp	65	17	1.254	5.01565e+06	6.28758e+06
P40142	Transketolase	Tkt	23	8	1.248	904003	1.12829e+06
Q8K386	Ras-related protein Rab-15	Rab15	6	1	1.247	324502	404815
Q60932	Voltage-dependent anion-selective channel protein 1	Vdac1	33	10	1.247	3.02912e+06	3.77857e+06
P97447	Four and a half LIM domains protein 1	Fhl1	4	2	1.241	242712	301098
P50518	V-type proton ATPase subunit E 1	Atp6v1e1	4	1	1.235	165626	204577
P48774	Glutathione S-transferase Mu 5	Gstm5	3	1	1.226	86471.3	105974
Q60931	Voltage-dependent anion-selective channel protein 3	Vdac3	18	6	1.221	2.10857e+06	2.57356e+06
P05201	Aspartate aminotransferase, cytoplasmic	Got1	61	17	1.213	4.02476e+06	4.88402e+06
Q9JKP5	Muscleblind-like protein 1	Mbnl1	1	1	1.209	4.51671e+09	5.4608e+09
P19783	Cytochrome c oxidase subunit 4 isoform 1, mitochondrial	Cox4i1	16	5	1.206	679556	819369
P0DP27	Calmodulin-2	Calm2	5	3	1.203	245356	295189
Q8QZT1	Acetyl-CoA acetyltransferase, mitochondrial	Acat1	6	2	1.203	324150	389947
Q06185	ATP synthase subunit e, mitochondrial	Atp5me	1	1	1.201	78445.3	94196.4
P56391	Cytochrome c oxidase subunit 6B1	Cox6b1	6	1	1.199	67901.3	81403
Q9CQ69	Cytochrome b-c1 complex subunit 8	Uqcrq	2	1	1.198	74547.4	89296.9
P14152	Malate dehydrogenase, cytoplasmic	Mdh1	20	6	1.183	1.50826e+06	1.7847e+06
P56480	ATP synthase subunit beta, mitochondrial	Atp5f1b	47	11	1.174	3.01977e+06	3.54545e+06
Q8K0U4	Heat shock 70 kDa protein 12A	Hspa12a	8	3	1.171	55773.8	65336.3
Q99P72	Reticulon-4	Rtn4	2	1	1.171	67615	79178.4
P63168	Dynein light chain 1, cytoplasmic	Dynll1	3	1	1.17	87226.7	102033
Q9QYC0	Alpha-adducin	Add1	1	1	1.158	66486.3	76989.1
Q9CQQ7	ATP synthase F(0) complex subunit B1, mitochondrial	Atp5pb	6	2	1.155	224370	259139
P59999	Actin-related protein 2/3 complex subunit 4	Arpc4	10	4	1.152	363559	418816
P52760	2-iminobutanoate/2-iminopropanoate deaminase	Rida	3	1	1.15	108728	124999
P68369	Tubulin alpha-1A chain	Tuba1a	199	7	1.146	3.00302e+07	3.44295e+07
P03995	Glial fibrillary acidic protein	Gfap	62	5	1.146	1.66859e+07	1.91258e+07
Q62188	Dihydropyrimidinase-related protein 3	Dpysl3	32	3	1.138	302622	344285
Q9R1P0	Proteasome subunit alpha type-4	Psma4	2	1	1.124	94194.6	105836
P00405	Cytochrome c oxidase subunit 2	Mtco2	10	3	1.118	357425	399705
P43277	Histone H1.3	H1-3	6	1	1.116	175101	195459
P97333	Neuropilin-1	Nrp1	2	1	1.105	4.33979e+06	4.79378e+06
P07356	Annexin A2	Anxa2	3	3	1.102	57193.4	63017.7
Q08189	Protein-glutamine gamma-glutamyltransferase E	Tgm3	2	1	1.102	105123	115827
Q91ZA3	Propionyl-CoA carboxylase alpha chain, mitochondrial	Pcca	561	51	1.099	1.7349e+08	1.90639e+08
P51150	Ras-related protein Rab-7a	Rab7a	5	1	1.084	131591	142688
P97315	Cysteine and glycine-rich protein 1	Csrp1	4	2	1.06	252439	267578
P68368	Tubulin alpha-4A chain	Tuba4a	171	6	1.058	2.12305e+06	2.24558e+06
Q8K183	Pyridoxal kinase	Pdxk	5	2	1.043	82161.3	85660.6
P09671	Superoxide dismutase	Sod2	7	2	1.034	446694	461893
P28271	Cytoplasmic aconitate hydratase	Aco1	42	16	1.023	3.33982e+06	3.41703e+06
P46660	Alpha-internexin	Ina	31	8	1.022	827339	845492
Q99MR8	Methylcrotonoyl-CoA carboxylase subunit alpha, mitochondrial	Mccc1	172	34	1.003	2.06223e+07	2.06756e+07
P17183	Gamma-enolase	Eno2	32	7	0.999	1.4289e+06	1.42805e+06
P17809	Solute carrier family 2, facilitated glucose transporter member 1	Slc2a1	2	1	0.989	55581.8	54996.9
Q04447	Creatine kinase B-type	Ckb	31	10	0.98	4.4073e+06	4.31944e+06
Q9DC70	NADH dehydrogenase	Ndufs7	2	1	0.966	69772.4	67368.2
Q8VDQ8	NAD-dependent protein deacetylase sirtuin-2	Sirt2	9	4	0.962	443851	426795
P08553	Neurofilament medium polypeptide	Nefm	33	11	0.945	1.40832e+06	1.33148e+06
Q62425	Cytochrome c oxidase subunit NDUFA4	Ndufa4	4	1	0.928	135687	125886
Q5SWU9	Acetyl-CoA carboxylase 1	Acaca	143	43	0.926	8.57841e+06	7.94682e+06
P28652	Calcium/calmodulin-dependent protein kinase type II subunit beta	Camk2b	39	4	0.915	233875	214074
Q9CR68	Cytochrome b-c1 complex subunit Rieske, mitochondrial	Uqcrfs1	8	2	0.909	244220	221874
Q05920	Pyruvate carboxylase, mitochondrial	Pc	555	59	0.904	1.79355e+08	1.62151e+08
P01869	Ig gamma-1 chain C region, membrane-bound form	Ighg1	10	3	0.844	972199	820838
E9Q557	Desmoplakin	Dsp	32	11	0.829	1.64935e+06	1.36729e+06
Q9D3D9	ATP synthase subunit delta, mitochondrial	Atp5f1d	1	1	0.813	56404.9	45861.7
Q91VD9	NADH-ubiquinone oxidoreductase 75 kDa subunit, mitochondrial	Ndufs1	11	2	0.793	308663	244758
P08113	Endoplasmin	Hsp90b1	7	1	0.786	101198	79541.5
P35293	Ras-related protein Rab-18	Rab18	3	1	0.776	49277.4	38262.4
Q61176	Arginase-1	Arg1	4	2	0.757	131422	99523.9
P05202	Aspartate aminotransferase, mitochondrial	Got2	80	17	0.751	1.18018e+07	8.86113e+06
Q02257	Junction plakoglobin	Jup	35	12	0.733	1.79506e+06	1.31583e+06
P05063	Fructose-bisphosphate aldolase C	Aldoc	37	7	0.597	649927	387879
P01837	Immunoglobulin kappa constant	Igkc	4	1	0.474	153399	72782.9
P0C0S6	Histone H2A.Z	H2az1	18	1	0.426	81224	34594.7
Q6Q477	Plasma membrane calcium-transporting ATPase 4	Atp2b4	12	1	0.421	39723.8	16714.1
O55143	Sarcoplasmic/endoplasmic reticulum calcium ATPase 2	Atp2a2	5	1	0.089	150506	13396.5
Q9QXA5	U6 snRNA-associated Sm-like protein LSm4	Lsm4	2	1	0.031	741198	23122.2

## Sheet: S3-8. 10 min 2.4 W-cm2, all
UniProt ID	Protein	Gene	# PSMs	# unique peptides	Fold change: Light (+) vs. Light (–)	Abundances (Grouped): Light(–)	Abundances (Grouped): Light(+)
Q9D2P8	Myelin-associated oligodendrocyte basic protein	Mobp	6	1	32.561	28838.1	938993
Q60625	Intercellular adhesion molecule 5	Icam5	58	18	28.011	504635	1.41354e+07
Q8BYI9	Tenascin-R	Tnr	97	31	24.366	1.18246e+06	2.88113e+07
B9EKR1	Receptor-type tyrosine-protein phosphatase zeta	Ptprz1	18	7	19.1	133228	2.54467e+06
Q9D1T0	Leucine-rich repeat and immunoglobulin-like domain-containing nogo receptor-interacting protein 1	Lingo1	21	7	16.857	139372	2.34939e+06
Q68FM6	Protein phosphatase 1 regulatory subunit 29	Elfn2	5	3	16.608	32070.2	532613
P23819	Glutamate receptor 2	Gria2	62	24	14.82	829185	1.22885e+07
Q9Z2W9	Glutamate receptor 3	Gria3	52	15	14.673	473729	6.95118e+06
P23818	Glutamate receptor 1	Gria1	76	23	14.526	633076	9.19629e+06
Q810U4	Neuronal cell adhesion molecule	Nrcam	37	17	14.474	367297	5.31609e+06
Q9Z218	Dipeptidyl aminopeptidase-like protein 6	Dpp6	42	17	14.012	419187	5.87377e+06
O35136	Neural cell adhesion molecule 2	Ncam2	12	6	13.481	127088	1.7133e+06
Q9CPW0	Contactin-associated protein-like 2	Cntnap2	22	13	13.393	116804	1.56435e+06
Q8K377	Leucine-rich repeat transmembrane neuronal protein 1	Lrrtm1	4	2	13	16684.7	216909
Q810U3	Neurofascin	Nfasc	52	21	12.628	589843	7.4483e+06
P11627	Neural cell adhesion molecule L1	L1cam	12	6	12.291	48274.1	593346
P35438	Glutamate receptor ionotropic, NMDA 1	Grin1	19	8	11.478	236140	2.71045e+06
O54991	Contactin-associated protein 1	Cntnap1	17	9	11.358	129385	1.46959e+06
Q9QUP5	Hyaluronan and proteoglycan link protein 1	Hapln1	17	8	11.252	354234	3.98594e+06
Q69ZK9	Neuroligin-2	Nlgn2	12	5	11.155	29211	325856
Q8BYM5	Neuroligin-3	Nlgn3	16	6	10.439	146404	1.52832e+06
Q8BGN3	Glycerophosphocholine cholinephosphodiesterase ENPP6	Enpp6	6	3	10.212	43902.8	448339
P55066	Neurocan core protein	Ncan	34	16	9.831	276145	2.71482e+06
Q8C3Q5	Protein shisa-7	Shisa7	9	4	9.61	70863.7	681002
Q8R464	Cell adhesion molecule 4	Cadm4	21	7	9.476	176617	1.67361e+06
Q8R366	Immunoglobulin superfamily member 8	Igsf8	24	8	9.079	205687	1.86741e+06
P15116	Cadherin-2	Cdh2	12	6	9.04	72172.2	652464
Q62059	Versican core protein	Vcan	15	8	8.92	173774	1.55002e+06
P10852	4F2 cell-surface antigen heavy chain	Slc3a2	16	8	8.732	188910	1.64949e+06
O88507	Ciliary neurotrophic factor receptor subunit alpha	Cntfr	9	4	8.695	32175.6	279776
O88322	Nidogen-2	Nid2	12	8	8.677	59996.1	520575
Q63912	Oligodendrocyte-myelin glycoprotein	Omg	11	4	8.639	79943.4	690600
O88998	Noelin	Olfm1	8	3	8.301	108574	901258
Q9D8B7	Junctional adhesion molecule C	Jam3	3	2	8.073	40715.2	328694
Q62283	Tetraspanin-7	Tspan7	2	1	7.9	23535.6	185920
Q8BLK3	Limbic system-associated membrane protein	Lsamp	21	8	7.85	324937	2.5508e+06
Q99PJ0	Neurotrimin	Ntm	7	4	7.838	21322.4	167134
P12960	Contactin-1	Cntn1	147	37	7.762	3.73452e+06	2.89859e+07
Q62443	Neuronal pentraxin-1	Nptx1	5	3	7.652	45884.2	351108
Q9R1V7	Disintegrin and metalloproteinase domain-containing protein 23	Adam23	9	5	7.62	95488.8	727662
Q9WVH9	Fibulin-5	Fbln5	2	1	7.27	21556.4	156704
Q9QYS2	Metabotropic glutamate receptor 3	Grm3	20	7	7.264	174208	1.26541e+06
Q61292	Laminin subunit beta-2	Lamb2	55	24	7.141	543591	3.88161e+06
Q8VHW2	Voltage-dependent calcium channel gamma-8 subunit	Cacng8	13	4	6.934	148045	1.0265e+06
P13595	Neural cell adhesion molecule 1	Ncam1	45	13	6.553	2.07271e+06	1.35815e+07
Q05793	Basement membrane-specific heparan sulfate proteoglycan core protein	Hspg2	37	21	6.504	370226	2.40778e+06
Q9Z1L5	Voltage-dependent calcium channel subunit alpha-2/delta-3	Cacna2d3	2	1	6.458	14734.7	95158.2
Q9R1V4	Disintegrin and metalloproteinase domain-containing protein 11	Adam11	3	2	6.451	31123.7	200773
P02468	Laminin subunit gamma-1	Lamc1	15	10	6.374	134920	860023
Q61137	Astrotactin-1	Astn1	4	3	6.35	8732.56	55448.7
Q80YX1	Tenascin	Tnc	13	9	6.329	135918	860235
P02463	Collagen alpha-1(IV) chain	Col4a1	4	2	6.308	37180.8	234546
P09470	Angiotensin-converting enzyme	Ace	11	8	6.3	110719	697547
P20917	Myelin-associated glycoprotein	Mag	21	11	6.1	574570	3.50493e+06
Q6VNS1	NT-3 growth factor receptor	Ntrk3	6	3	6.093	48404.4	294932
Q80TL0	Protein phosphatase 1E	Ppm1e	1	1	6.068	12422.4	75379.1
O35449	Proline-rich transmembrane protein 1	Prrt1	3	2	6.054	50526.4	305884
Q9Z2W8	Glutamate receptor 4	Gria4	15	2	6.052	26324.2	159319
P0C192	Leucine-rich repeat-containing protein 4B	Lrrc4b	6	4	6.012	42652.2	256443
P70663	SPARC-like protein 1	Sparcl1	2	1	5.999	23927.5	143541
Q9JIA1	Leucine-rich glioma-inactivated protein 1	Lgi1	13	8	5.944	248833	1.47912e+06
P01831	Thy-1 membrane glycoprotein	Thy1	16	3	5.677	661134	3.75337e+06
P97797	Tyrosine-protein phosphatase non-receptor type substrate 1	Sirpa	16	7	5.636	389589	2.19584e+06
Q8BLQ9	Cell adhesion molecule 2	Cadm2	7	4	5.484	111951	613958
P09055	Integrin beta-1	Itgb1	6	3	5.473	63977.7	350164
Q9QZF2	Glypican-1	Gpc1	13	7	5.418	130867	709069
Q9R1V6	Disintegrin and metalloproteinase domain-containing protein 22	Adam22	3	2	5.406	41755.7	225730
O88343	Electrogenic sodium bicarbonate cotransporter 1	Slc4a4	9	5	5.346	165106	882593
Q8CJH3	Plexin-B1	Plxnb1	8	4	5.336	70852.6	378088
Q64487	Receptor-type tyrosine-protein phosphatase delta	Ptprd	9	4	5.298	48748.6	258262
B0V2N1	Receptor-type tyrosine-protein phosphatase S	Ptprs	12	5	5.292	88975.6	470831
P10493	Nidogen-1	Nid1	24	12	5.059	345615	1.74847e+06
Q6P9K9	Neurexin-3	Nrxn3	4	2	5.047	42712.8	215587
Q99N28	Cell adhesion molecule 3	Cadm3	15	5	4.994	308717	1.54177e+06
Q80UG2	Plexin-A4	Plxna4	21	7	4.979	101494	505292
Q61361	Brevican core protein	Bcan	38	19	4.968	1.04529e+06	5.19304e+06
Q6NXK7	Inactive dipeptidyl peptidase 10	Dpp10	7	4	4.933	89997.4	443927
P14231	Sodium/potassium-transporting ATPase subunit beta-2	Atp1b2	16	4	4.868	388956	1.89353e+06
O08749	Dihydrolipoyl dehydrogenase, mitochondrial	Dld	6	2	4.726	47726.3	225553
P97370	Sodium/potassium-transporting ATPase subunit beta-3	Atp1b3	1	1	4.713	23566.8	111059
P70232	Neural cell adhesion molecule L1-like protein	Chl1	8	4	4.675	73675.2	344413
O09114	Prostaglandin-H2 D-isomerase	Ptgds	2	2	4.674	31406	146782
Q80Z24	Neuronal growth regulator 1	Negr1	5	4	4.505	20168.8	90861.4
Q61001	Laminin subunit alpha-5	Lama5	7	5	4.365	34516.4	150659
P55288	Cadherin-11	Cdh11	3	2	4.328	39276.4	169997
Q14BI2	Metabotropic glutamate receptor 2	Grm2	7	1	4.22	17110.8	72203.8
Q99M71	Mammalian ependymin-related protein 1	Epdr1	4	2	4.15	92982.9	385884
A2ASQ1	Agrin	Agrn	10	7	4.145	141688	587316
Q68ED2	Metabotropic glutamate receptor 7	Grm7	9	6	4.119	126036	519199
Q3TXX4	Vesicular glutamate transporter 1	Slc17a7	12	5	4.089	391910	1.60261e+06
Q3UVX5	Metabotropic glutamate receptor 5	Grm5	11	5	4.042	77777.4	314387
P31650	Sodium- and chloride-dependent GABA transporter 3	Slc6a11	8	2	3.8	79130.1	300723
Q9CS84	Neurexin-1	Nrxn1	7	4	3.742	78066.8	292151
P35436	Glutamate receptor ionotropic, NMDA 2A	Grin2a	10	6	3.721	52648.5	195926
Q5DTL9	Sodium-driven chloride bicarbonate exchanger	Slc4a10	2	2	3.716	17577.9	65318.4
Q8R2Y2	Cell surface glycoprotein MUC18	Mcam	4	2	3.708	64190	238003
Q9R0K7	Plasma membrane calcium-transporting ATPase 2	Atp2b2	21	4	3.641	111609	406415
P21460	Cystatin-C	Cst3	7	2	3.601	22013.6	79262.8
P26040	Ezrin	Ezr	1	1	3.537	30502.9	107901
P04925	Major prion protein	Prnp	5	3	3.505	46454.5	162817
Q8VHY0	Chondroitin sulfate proteoglycan 4	Cspg4	5	4	3.449	88601.8	305545
P68040	Receptor of activated protein C kinase 1	Rack1	4	2	3.421	18629.6	63737.7
Q8CGM1	Adhesion G protein-coupled receptor B2	Adgrb2	2	1	3.398	19856	67469.4
O70423	Membrane primary amine oxidase	Aoc3	4	3	3.349	64795.5	216982
Q8K093	Thyrotropin-releasing hormone-degrading ectoenzyme	Trhde	2	2	3.278	41571.6	136257
Q01097	Glutamate receptor ionotropic, NMDA 2B	Grin2b	3	3	3.204	34770.2	111417
P55088	Aquaporin-4	Aqp4	1	1	3.005	94131.2	282873
Q61330	Contactin-2	Cntn2	9	6	2.895	180894	523752
Q8CI94	Glycogen phosphorylase, brain form	Pygb	12	8	2.87	231310	663899
Q8K406	Leucine-rich repeat LGI family member 3	Lgi3	2	1	2.87	16286.3	46748.9
P08122	Collagen alpha-2(IV) chain	Col4a2	1	1	2.8	44785.8	125407
B1AWN6	Sodium channel protein type 2 subunit alpha	Scn2a	2	1	2.758	20041	55266.7
P70206	Plexin-A1	Plxna1	21	7	2.718	255866	695373
Q80T79	CUB and sushi domain-containing protein 3	Csmd3	2	1	2.701	30361.5	81999.1
P07724	Albumin	Alb	73	23	2.678	3.22884e+06	8.64596e+06
P21278	Guanine nucleotide-binding protein subunit alpha-11	Gna11	2	1	2.674	24452.6	65387.5
Q61490	CD166 antigen	Alcam	1	1	2.639	26684.8	70426.3
Q62413	Ephrin type-A receptor 6	Epha6	2	1	2.604	34003.2	88549.3
P35762	CD81 antigen	Cd81	2	1	2.508	27271.5	68385.5
P97350	Plakophilin-1	Pkp1	1	1	2.504	64435.7	161319
P11438	Lysosome-associated membrane glycoprotein 1	Lamp1	1	1	2.431	37077.3	90127.5
P43006	Excitatory amino acid transporter 2	Slc1a2	43	10	2.425	5.90091e+06	1.43105e+07
Q9CZW5	Mitochondrial import receptor subunit TOM70	Tomm70	1	1	2.362	38415.7	90719.3
Q7TME0	Phospholipid phosphatase-related protein type 4	Plppr4	2	2	2.354	56906.9	133972
Q91V41	Ras-related protein Rab-14	Rab14	7	3	2.346	133954	314249
Q9R069	Basal cell adhesion molecule	Bcam	3	2	2.322	26502.4	61539.2
P17809	Solute carrier family 2, facilitated glucose transporter member 1	Slc2a1	1	1	2.322	77297.8	179505
Q99J85	Neuronal pentraxin receptor	Nptxr	3	3	2.321	20382.7	47304.4
Q9CQW2	ADP-ribosylation factor-like protein 8B	Arl8b	2	2	2.32	145692	337942
Q91V14	Solute carrier family 12 member 5	Slc12a5	12	6	2.272	306576	696559
P70296	Phosphatidylethanolamine-binding protein 1	Pebp1	3	2	2.268	259216	587807
P12382	ATP-dependent 6-phosphofructokinase, liver type	Pfkl	6	1	2.249	34991	78680.3
Q3UH99	Protein shisa-6	Shisa6	2	1	2.231	32195.2	71817.4
P63082	V-type proton ATPase 16 kDa proteolipid subunit c	Atp6v0c	6	1	2.176	90896.6	197792
P61089	Ubiquitin-conjugating enzyme E2 N	Ube2n	3	2	2.147	36869.2	79173.4
Q8BM13	Noelin-2	Olfm2	1	1	2.129	20233.2	43066.9
P31648	Sodium- and chloride-dependent GABA transporter 1	Slc6a1	7	2	2.123	199567	423743
Q5M8N0	CB1 cannabinoid receptor-interacting protein 1	Cnrip1	8	3	2.079	291510	606193
P53994	Ras-related protein Rab-2A	Rab2a	13	2	2.038	285483	581941
Q8BI08	Protein MAL2	Mal2	1	1	2.037	84936.3	173042
Q9Z0E0	Neurochondrin	Ncdn	31	10	2.028	625844	1.26945e+06
Q9R0P9	Ubiquitin carboxyl-terminal hydrolase isozyme L1	Uchl1	15	6	2.019	668412	1.3496e+06
Q9DCX2	ATP synthase subunit d, mitochondrial	Atp5pd	9	2	1.993	127085	253276
P06837	Neuromodulin	Gap43	5	1	1.979	202281	400345
Q64332	Synapsin-2	Syn2	33	10	1.921	1.26023e+06	2.42111e+06
P62761	Visinin-like protein 1	Vsnl1	1	1	1.92	59873.7	114986
Q8VEH3	ADP-ribosylation factor-like protein 8A	Arl8a	3	1	1.919	54179.4	103952
P52760	2-iminobutanoate/2-iminopropanoate deaminase	Rida	6	4	1.912	334305	639214
P70414	Sodium/calcium exchanger 1	Slc8a1	5	3	1.893	58739.6	111182
B5TVM2	Immunoglobulin-like domain-containing receptor 2	Ildr2	2	1	1.88	29348.7	55172.5
Q64433	10 kDa heat shock protein, mitochondrial	Hspe1	2	2	1.873	23651.7	44309.6
Q01853	Transitional endoplasmic reticulum ATPase	Vcp	2	2	1.869	182344	340727
Q5PR73	GTP-binding protein Di-Ras2	Diras2	2	1	1.869	34038.4	63630.7
Q60771	Claudin-11	Cldn11	3	1	1.848	411342	760030
Q80YA8	Protein crumbs homolog 2	Crb2	3	2	1.839	19777.7	36362
Q9Z1G4	V-type proton ATPase 116 kDa subunit a 1	Atp6v0a1	16	7	1.834	394059	722563
Q9D023	Mitochondrial pyruvate carrier 2	Mpc2	2	2	1.816	71945.8	130682
Q9CWF2	Tubulin beta-2B chain	Tubb2b	340	1	1.812	469627	850959
Q8BG39	Synaptic vesicle glycoprotein 2B	Sv2b	5	3	1.812	68697.6	124468
P70349	Adenosine 5'-monophosphoramidase HINT1	Hint1	3	1	1.788	46608.1	83339.4
Q8BGT8	Phytanoyl-CoA hydroxylase-interacting protein-like	Phyhipl	8	3	1.783	265936	474034
O08709	Peroxiredoxin-6	Prdx6	21	7	1.781	528988	942247
P62717	60S ribosomal protein L18a	Rpl18a	1	1	1.773	42403.8	75189.9
Q9CQI6	Coactosin-like protein	Cotl1	10	4	1.766	118233	208846
Q80ZF8	Adhesion G protein-coupled receptor B3	Adgrb3	2	2	1.764	51530.4	90896.4
P62743	AP-2 complex subunit sigma	Ap2s1	4	1	1.76	174547	307153
P63318	Protein kinase C gamma type	Prkcg	27	10	1.753	581685	1.01988e+06
Q61598	Rab GDP dissociation inhibitor beta	Gdi2	15	2	1.727	99834.6	172421
P57780	Alpha-actinin-4	Actn4	2	1	1.723	44388.1	76470.6
Q62108	Disks large homolog 4	Dlg4	14	7	1.702	276728	470931
P47857	ATP-dependent 6-phosphofructokinase, muscle type	Pfkm	8	4	1.693	304840	515995
Q91ZX7	Prolow-density lipoprotein receptor-related protein 1	Lrp1	21	15	1.678	433510	727565
P14094	Sodium/potassium-transporting ATPase subunit beta-1	Atp1b1	34	8	1.676	3.75343e+06	6.2907e+06
Q5RI75	Ras and EF-hand domain-containing protein homolog	Rasef	1	1	1.674	57695.5	96600.8
P17710	Hexokinase-1	Hk1	51	17	1.667	2.20881e+06	3.68242e+06
P35803	Neuronal membrane glycoprotein M6-b	Gpm6b	2	1	1.664	127213	211683
P47911	60S ribosomal protein L6	Rpl6	1	1	1.663	59501.6	98931.2
P19536	Cytochrome c oxidase subunit 5B, mitochondrial	Cox5b	3	1	1.656	122062	202188
P56564	Excitatory amino acid transporter 1	Slc1a3	14	3	1.65	1.65013e+06	2.72282e+06
Q9D1A0	Peroxiredoxin-like 2C	Prxl2c	2	1	1.637	1.82181e+06	2.98281e+06
Q8VEM8	Phosphate carrier protein, mitochondrial	Slc25a3	12	5	1.631	780415	1.27262e+06
P68254	14-3-3 protein theta	Ywhaq	21	2	1.63	59249.3	96593.3
Q99LX0	Parkinson disease protein 7 homolog	Park7	2	1	1.626	48170.6	78346.2
Q8K2B3	Succinate dehydrogenase	Sdha	5	4	1.619	215336	348667
Q8BGH2	Sorting and assembly machinery component 50 homolog	Samm50	2	1	1.615	40814.2	65899.7
P62880	Guanine nucleotide-binding protein G(I)/G(S)/G(T) subunit beta-2	Gnb2	16	2	1.604	247301	396724
P62827	GTP-binding nuclear protein Ran	Ran	13	5	1.597	547633	874450
Q91V61	Sideroflexin-3	Sfxn3	4	2	1.597	241040	384834
P17897	Lysozyme C-1	Lyz1	5	1	1.597	283794	453263
Q9R0P3	S-formylglutathione hydrolase	Esd	3	1	1.593	43673.3	69568.7
Q9EPL2	Calsyntenin-1	Clstn1	2	1	1.585	32111.9	50908.9
P63011	Ras-related protein Rab-3A	Rab3a	29	6	1.57	3.44026e+06	5.39974e+06
P84091	AP-2 complex subunit mu	Ap2m1	16	7	1.57	1.15642e+06	1.81611e+06
P51863	V-type proton ATPase subunit d 1	Atp6v0d1	7	3	1.568	134742	211300
Q9D6F9	Tubulin beta-4A chain	Tubb4a	244	3	1.564	520981	814860
Q7TMM9	Tubulin beta-2A chain	Tubb2a	348	2	1.551	4.20795e+07	6.52578e+07
Q3UMR5	Calcium uniporter protein, mitochondrial	Mcu	2	2	1.546	32620.6	50442.6
P14211	Calreticulin	Calr	3	2	1.546	32356.9	50015
P46096	Synaptotagmin-1	Syt1	42	12	1.541	2.51461e+06	3.87506e+06
Q9JKD3	Secretory carrier-associated membrane protein 5	Scamp5	4	2	1.538	171357	263542
P20029	Endoplasmic reticulum chaperone BiP	Hspa5	10	2	1.535	144134	221199
P63005	Platelet-activating factor acetylhydrolase IB subunit beta	Pafah1b1	3	1	1.534	69142.6	106054
P34884	Macrophage migration inhibitory factor	Mif	63	4	1.53	1.47295e+07	2.25311e+07
P47754	F-actin-capping protein subunit alpha-2	Capza2	10	4	1.53	414830	634621
O88342	WD repeat-containing protein 1	Wdr1	26	7	1.523	1.01289e+06	1.54272e+06
Q61885	Myelin-oligodendrocyte glycoprotein	Mog	11	3	1.522	1.3609e+06	2.07138e+06
P10630	Eukaryotic initiation factor 4A-II	Eif4a2	5	3	1.518	174150	264341
Q9CYT6	Adenylyl cyclase-associated protein 2	Cap2	1	1	1.516	26433.9	40061.2
Q9R0P5	Destrin	Dstn	2	1	1.51	104924	158460
P68510	14-3-3 protein eta	Ywhah	24	5	1.508	547490	825697
Q61553	Fascin	Fscn1	12	4	1.508	389159	586913
P35276	Ras-related protein Rab-3D	Rab3d	6	1	1.506	346364	521527
P62823	Ras-related protein Rab-3C	Rab3c	9	2	1.505	379617	571198
Q8VDN2	Sodium/potassium-transporting ATPase subunit alpha-1	Atp1a1	139	7	1.502	1.0567e+06	1.58756e+06
P51881	ADP/ATP translocase 2	Slc25a5	73	5	1.502	2.15048e+06	3.23081e+06
Q8BH59	Electrogenic aspartate/glutamate antiporter SLC25A12, mitochondrial	Slc25a12	14	7	1.502	502993	755528
Q5SQX6	Cytoplasmic FMR1-interacting protein 2	Cyfip2	14	4	1.502	141764	212914
P61982	14-3-3 protein gamma	Ywhag	33	6	1.493	1.24934e+06	1.86486e+06
P61226	Ras-related protein Rap-2b	Rap2b	6	2	1.49	140260	209033
Q01768	Nucleoside diphosphate kinase B	Nme2	18	4	1.488	1.08075e+06	1.60821e+06
Q9CZY3	Ubiquitin-conjugating enzyme E2 variant 1	Ube2v1	1	1	1.486	79805.8	118602
P62259	14-3-3 protein epsilon	Ywhae	27	7	1.485	463703	688811
P60867	40S ribosomal protein S20	Rps20	4	2	1.485	121875	181024
P99024	Tubulin beta-5 chain	Tubb5	304	5	1.483	4.30949e+06	6.38979e+06
P32037	Solute carrier family 2, facilitated glucose transporter member 3	Slc2a3	4	2	1.482	188771	279729
Q62277	Synaptophysin	Syp	6	1	1.48	866158	1.28216e+06
Q8CHH9	Septin-8	Septin8	9	2	1.475	486183	716913
Q791V5	Mitochondrial carrier homolog 2	Mtch2	6	3	1.475	213223	314514
P16330	2',3'-cyclic-nucleotide 3'-phosphodiesterase	Cnp	77	18	1.471	7.38457e+06	1.08624e+07
P18872	Guanine nucleotide-binding protein G(o) subunit alpha	Gnao1	36	9	1.462	3.01e+06	4.39992e+06
P47738	Aldehyde dehydrogenase, mitochondrial	Aldh2	1	1	1.462	21737.9	31784.4
Q9D6M3	Mitochondrial glutamate carrier 1	Slc25a22	15	5	1.461	1.01708e+06	1.48562e+06
Q99KI0	Aconitate hydratase, mitochondrial	Aco2	60	16	1.46	2.55388e+06	3.72885e+06
Q9D358	Low molecular weight phosphotyrosine protein phosphatase	Acp1	1	1	1.46	42292.8	61735.2
P56135	ATP synthase subunit f, mitochondrial	Atp5mf	3	1	1.458	137870	201080
Q99PT1	Rho GDP-dissociation inhibitor 1	Arhgdia	18	5	1.454	999403	1.45273e+06
P46460	Vesicle-fusing ATPase	Nsf	45	14	1.45	2.17472e+06	3.15408e+06
P63001	Ras-related C3 botulinum toxin substrate 1	Rac1	10	4	1.45	1.10348e+06	1.60023e+06
Q8BK64	Activator of 90 kDa heat shock protein ATPase homolog 1	Ahsa1	2	2	1.447	37671.5	54494
P10649	Glutathione S-transferase Mu 1	Gstm1	7	3	1.443	349980	505133
P60202	Myelin proteolipid protein	Plp1	39	6	1.44	1.0386e+07	1.49511e+07
P61205	ADP-ribosylation factor 3	Arf3	17	3	1.438	883420	1.2708e+06
Q8BZ98	Dynamin-3	Dnm3	9	2	1.437	224432	322547
P62897	Cytochrome c, somatic	Cycs	2	1	1.435	453471	650567
Q60930	Voltage-dependent anion-selective channel protein 2	Vdac2	28	8	1.433	3.30032e+06	4.7285e+06
P62908	40S ribosomal protein S3	Rps3	2	1	1.432	83542.4	119661
Q91V12	Cytosolic acyl coenzyme A thioester hydrolase	Acot7	11	6	1.431	479232	685661
Q8K0U4	Heat shock 70 kDa protein 12A	Hspa12a	10	4	1.423	165827	235915
Q9R0Q6	Actin-related protein 2/3 complex subunit 1A	Arpc1a	3	1	1.423	146319	208221
Q68FD5	Clathrin heavy chain 1	Cltc	112	32	1.422	4.39662e+06	6.25066e+06
Q9D051	Pyruvate dehydrogenase E1 component subunit beta, mitochondrial	Pdhb	10	4	1.419	616098	874061
P48962	ADP/ATP translocase 1	Slc25a4	87	10	1.417	1.13663e+07	1.61091e+07
G5E829	Plasma membrane calcium-transporting ATPase 1	Atp2b1	43	8	1.417	1.16751e+06	1.65463e+06
Q6PAQ4	RNA exonuclease 4	Rexo4	1	1	1.413	19242.8	27198.9
Q9QYG0	Protein NDRG2	Ndrg2	3	1	1.412	105023	148290
Q9QYC0	Alpha-adducin	Add1	5	2	1.411	293408	413978
Q9R0Y5	Adenylate kinase isoenzyme 1	Ak1	1	1	1.407	38886.2	54701.6
Q9CQD1	Ras-related protein Rab-5A	Rab5a	6	1	1.406	37413.5	52597.7
P67778	Prohibitin 1	Phb1	1	1	1.405	47639.2	66910.4
Q05816	Fatty acid-binding protein 5	Fabp5	2	1	1.405	117067	164430
Q9Z140	Copine-6	Cpne6	6	2	1.4	154300	216085
Q9D0M5	Dynein light chain 2, cytoplasmic	Dynll2	4	2	1.399	258023	361026
P39053	Dynamin-1	Dnm1	53	15	1.398	2.99531e+06	4.1866e+06
Q71M36	Chondroitin sulfate proteoglycan 5	Cspg5	8	3	1.398	385331	538519
Q9DBG3	AP-2 complex subunit beta	Ap2b1	16	5	1.394	701836	978204
P62245	40S ribosomal protein S15a	Rps15a	1	1	1.393	72573.8	101122
Q9D0M3	Cytochrome c1, heme protein, mitochondrial	Cyc1	2	2	1.383	130436	180434
P57722	Poly(rC)-binding protein 3	Pcbp3	7	1	1.381	114298	157822
Q02053	Ubiquitin-like modifier-activating enzyme 1	Uba1	4	3	1.375	58643.9	80640.2
P04370	Myelin basic protein	Mbp	27	5	1.37	5.32184e+06	7.28912e+06
P20108	Thioredoxin-dependent peroxide reductase, mitochondrial	Prdx3	16	3	1.37	633621	868270
Q8QZT1	Acetyl-CoA acetyltransferase, mitochondrial	Acat1	8	3	1.37	596649	817448
Q64436	Potassium-transporting ATPase alpha chain 1	Atp4a	33	1	1.365	758349	1.03482e+06
P70404	Isocitrate dehydrogenase	Idh3g	2	2	1.365	45304	61828
Q9ERD7	Tubulin beta-3 chain	Tubb3	208	8	1.364	831461	1.13407e+06
P16546	Spectrin alpha chain, non-erythrocytic 1	Sptan1	60	28	1.361	1.9385e+06	2.63899e+06
Q9JIS5	Synaptic vesicle glycoprotein 2A	Sv2a	12	6	1.36	174515	237421
P06151	L-lactate dehydrogenase A chain	Ldha	23	7	1.359	2.9511e+06	4.01014e+06
P24369	Peptidyl-prolyl cis-trans isomerase B	Ppib	3	1	1.357	49325.6	66924.4
P68372	Tubulin beta-4B chain	Tubb4b	282	1	1.354	3.01855e+06	4.08798e+06
Q8K596	Sodium/calcium exchanger 2	Slc8a2	4	3	1.354	141283	191262
Q8CAQ8	MICOS complex subunit Mic60	Immt	5	5	1.353	175465	237416
P35980	60S ribosomal protein L18	Rpl18	1	1	1.353	50644	68500.3
Q9CQN1	Heat shock protein 75 kDa, mitochondrial	Trap1	3	1	1.348	810344	1.09251e+06
C0HKE3	Histone H2A type 1-D	H2ac7	26	2	1.345	3.29721e+06	4.4357e+06
Q7TQD2	Tubulin polymerization-promoting protein	Tppp	13	4	1.345	943633	1.26923e+06
Q80XN0	D-beta-hydroxybutyrate dehydrogenase, mitochondrial	Bdh1	3	2	1.345	86175.9	115932
P43277	Histone H1.3	H1-3	9	1	1.339	347321	465034
P17427	AP-2 complex subunit alpha-2	Ap2a2	27	8	1.337	719069	961473
P08228	Superoxide dismutase	Sod1	15	4	1.337	1.2852e+06	1.71812e+06
P48771	Cytochrome c oxidase subunit 7A2, mitochondrial	Cox7a2	2	1	1.336	55049.9	73543
Q9D5Y1	Coiled-coil domain-containing protein 39	Ccdc39	6	1	1.334	250273	333945
P17426	AP-2 complex subunit alpha-1	Ap2a1	29	6	1.333	343506	457858
P62874	Guanine nucleotide-binding protein G(I)/G(S)/G(T) subunit beta-1	Gnb1	21	3	1.328	1.68335e+06	2.23631e+06
Q7M6Z0	Reticulon-4 receptor-like 2	Rtn4rl2	2	2	1.326	32804.7	43500.1
Q6PIC6	Sodium/potassium-transporting ATPase subunit alpha-3	Atp1a3	231	22	1.323	2.52642e+07	3.34341e+07
O55042	Alpha-synuclein	Snca	1	1	1.323	59878.9	79193.4
P47757	F-actin-capping protein subunit beta	Capzb	10	4	1.321	443126	585465
P14733	Lamin-B1	Lmnb1	1	1	1.321	18002.6	23779.6
O89053	Coronin-1A	Coro1a	6	3	1.319	171362	226092
P56391	Cytochrome c oxidase subunit 6B1	Cox6b1	8	1	1.319	99383.8	131072
P31938	Dual specificity mitogen-activated protein kinase kinase 1	Map2k1	5	2	1.318	91894.2	121085
Q9CPU4	Microsomal glutathione S-transferase 3	Mgst3	1	1	1.318	67797.3	89367.1
Q8K0T0	Reticulon-1	Rtn1	4	1	1.317	172926	227757
Q80TJ1	Calcium-dependent secretion activator 1	Cadps	3	3	1.31	67212.3	88015.6
Q64521	Glycerol-3-phosphate dehydrogenase, mitochondrial	Gpd2	5	3	1.309	78892.9	103300
Q9R1P3	Proteasome subunit beta type-2	Psmb2	1	1	1.309	37501.5	49093.9
O08599	Syntaxin-binding protein 1	Stxbp1	36	13	1.307	2.64028e+06	3.45109e+06
Q9CR62	Mitochondrial 2-oxoglutarate/malate carrier protein	Slc25a11	3	1	1.307	127243	166335
P35802	Neuronal membrane glycoprotein M6-a	Gpm6a	14	5	1.303	1.146e+06	1.4928e+06
P17751	Triosephosphate isomerase	Tpi1	44	12	1.302	4.09545e+06	5.33046e+06
P99029	Peroxiredoxin-5, mitochondrial	Prdx5	8	3	1.3	442736	575523
Q76MZ3	Serine/threonine-protein phosphatase 2A 65 kDa regulatory subunit A alpha isoform	Ppp2r1a	1	1	1.299	85256.7	110789
P62835	Ras-related protein Rap-1A	Rap1a	3	1	1.296	74549.2	96586.3
Q62425	Cytochrome c oxidase subunit NDUFA4	Ndufa4	5	2	1.294	426166	551455
P58252	Elongation factor 2	Eef2	11	4	1.293	187859	242822
P60879	Synaptosomal-associated protein 25	Snap25	2	1	1.291	54155.8	69917.9
P61027	Ras-related protein Rab-10	Rab10	11	2	1.29	259648	335032
Q9D6R2	Isocitrate dehydrogenase	Idh3a	14	4	1.288	389875	502051
P38647	Stress-70 protein, mitochondrial	Hspa9	5	2	1.287	154813	199298
P62137	Serine/threonine-protein phosphatase PP1-alpha catalytic subunit	Ppp1ca	1	1	1.285	82810.7	106396
Q7TQF7	Amphiphysin	Amph	4	3	1.283	119399	153161
Q9CPU0	Lactoylglutathione lyase	Glo1	6	2	1.279	621967	795449
P16125	L-lactate dehydrogenase B chain	Ldhb	27	7	1.277	3.19725e+06	4.08242e+06
P50396	Rab GDP dissociation inhibitor alpha	Gdi1	24	4	1.277	1.14422e+06	1.46069e+06
P00405	Cytochrome c oxidase subunit 2	Mtco2	11	3	1.276	514497	656301
P11499	Heat shock protein HSP 90-beta	Hsp90ab1	42	10	1.268	1.82639e+06	2.31641e+06
Q61644	Protein kinase C and casein kinase substrate in neurons protein 1	Pacsin1	2	2	1.266	278658	352720
Q8K386	Ras-related protein Rab-15	Rab15	7	1	1.264	538053	680139
Q9JJV2	Profilin-2	Pfn2	1	1	1.263	70846.3	89478.7
P02088	Hemoglobin subunit beta-1	Hbb-b1	31	8	1.261	2.49681e+06	3.14856e+06
Q91XM9	Disks large homolog 2	Dlg2	3	2	1.256	32185	40426.7
Q9WUM5	Succinate--CoA ligase	Suclg1	7	3	1.253	256340	321188
Q62261	Spectrin beta chain, non-erythrocytic 1	Sptbn1	15	12	1.252	726541	909889
P62631	Elongation factor 1-alpha 2	Eef1a2	47	3	1.249	595154	743379
Q8K0S0	Phytanoyl-CoA hydroxylase-interacting protein	Phyhip	5	1	1.248	61865.7	77179.4
Q8R191	Synaptogyrin-3	Syngr3	2	1	1.246	294668	367158
P40124	Adenylyl cyclase-associated protein 1	Cap1	3	1	1.243	77368.1	96172.1
Q9R111	Guanine deaminase	Gda	4	2	1.243	151845	188749
Q9QYR6	Microtubule-associated protein 1A	Map1a	17	7	1.242	374867	465731
O35643	AP-1 complex subunit beta-1	Ap1b1	7	1	1.242	85519.3	106255
Q60675	Laminin subunit alpha-2	Lama2	2	2	1.241	38080.5	47241.4
Q60931	Voltage-dependent anion-selective channel protein 3	Vdac3	21	7	1.24	3.61722e+06	4.48497e+06
P68404	Protein kinase C beta type	Prkcb	2	1	1.24	51978.1	64466.1
Q9WV92	Band 4.1-like protein 3	Epb41l3	10	5	1.239	157974	195730
Q8C0M9	Isoaspartyl peptidase/L-asparaginase	Asrgl1	12	6	1.235	309755	382698
Q9DCZ4	MICOS complex subunit Mic26	Apoo	6	2	1.235	169659	209607
Q8C0E2	Vacuolar protein sorting-associated protein 26B	Vps26b	1	1	1.234	32518.6	40120.9
P10126	Elongation factor 1-alpha 1	Eef1a1	51	4	1.227	5.6262e+06	6.90321e+06
Q9CZ13	Cytochrome b-c1 complex subunit 1, mitochondrial	Uqcrc1	17	6	1.227	344775	423089
Q7TQI3	Ubiquitin thioesterase OTUB1	Otub1	2	1	1.226	70188.4	86059
P52480	Pyruvate kinase PKM	Pkm	67	17	1.224	4.47317e+06	5.4737e+06
Q8BFR5	Elongation factor Tu, mitochondrial	Tufm	12	5	1.223	328173	401385
P16858	Glyceraldehyde-3-phosphate dehydrogenase	Gapdh	86	14	1.22	1.54041e+07	1.87944e+07
P60766	Cell division control protein 42 homolog	Cdc42	10	2	1.218	305397	372068
Q9DC70	NADH dehydrogenase	Ndufs7	3	1	1.212	102122	123726
P63085	Mitogen-activated protein kinase 1	Mapk1	8	3	1.21	321335	388789
Q9D2G2	Dihydrolipoyllysine-residue succinyltransferase component of 2-oxoglutarate dehydrogenase complex, mitochondrial	Dlst	9	3	1.204	266044	320278
P11798	Calcium/calmodulin-dependent protein kinase type II subunit alpha	Camk2a	71	12	1.201	8.47866e+06	1.01863e+07
P63101	14-3-3 protein zeta/delta	Ywhaz	55	8	1.2	9.68394e+06	1.16253e+07
P62814	V-type proton ATPase subunit B, brain isoform	Atp6v1b2	13	7	1.2	567935	681762
Q9D1G1	Ras-related protein Rab-1B	Rab1b	3	2	1.195	38884.5	46484.7
Q61171	Peroxiredoxin-2	Prdx2	32	9	1.192	3.8895e+06	4.63731e+06
Q8K1M6	Dynamin-1-like protein	Dnm1l	1	1	1.19	52804.6	62850.3
P43274	Histone H1.4	H1-4	10	1	1.187	112210	133237
P00493	Hypoxanthine-guanine phosphoribosyltransferase	Hprt1	7	3	1.186	148320	175876
P09411	Phosphoglycerate kinase 1	Pgk1	24	8	1.185	2.08093e+06	2.46523e+06
Q6PHN9	Ras-related protein Rab-35	Rab35	1	1	1.185	99470.9	117842
Q91VR2	ATP synthase subunit gamma, mitochondrial	Atp5f1c	5	3	1.176	155218	182471
Q921F2	TAR DNA-binding protein 43	Tardbp	1	1	1.169	198823	232522
Q6PIE5	Sodium/potassium-transporting ATPase subunit alpha-2	Atp1a2	165	14	1.168	1.99595e+06	2.33151e+06
Q9WV18	Gamma-aminobutyric acid type B receptor subunit 1	Gabbr1	4	2	1.166	423966	494446
Q9DBJ1	Phosphoglycerate mutase 1	Pgam1	19	5	1.161	1.51034e+06	1.75286e+06
Q9DC69	NADH dehydrogenase	Ndufa9	4	3	1.16	78175.6	90660.6
P35278	Ras-related protein Rab-5C	Rab5c	2	1	1.16	62008.7	71923.4
Q9DB77	Cytochrome b-c1 complex subunit 2, mitochondrial	Uqcrc2	7	4	1.149	220534	253383
P50516	V-type proton ATPase catalytic subunit A	Atp6v1a	23	9	1.148	1.51636e+06	1.74144e+06
Q7TSJ2	Microtubule-associated protein 6	Map6	7	3	1.148	57463.7	65985.6
Q9CVB6	Actin-related protein 2/3 complex subunit 2	Arpc2	5	2	1.148	133908	153679
Q9CQR4	Acyl-coenzyme A thioesterase 13	Acot13	4	1	1.145	136510	156289
E9Q557	Desmoplakin	Dsp	44	16	1.141	2.92129e+06	3.33445e+06
Q91XV3	Brain acid soluble protein 1	Basp1	15	5	1.138	920983	1.04822e+06
Q9EQF6	Dihydropyrimidinase-related protein 5	Dpysl5	16	5	1.136	233193	264937
P97427	Dihydropyrimidinase-related protein 1	Crmp1	44	5	1.131	845421	956454
P63328	Protein phosphatase 3 catalytic subunit alpha	Ppp3ca	36	12	1.129	2.72413e+06	3.0755e+06
D3Z7P3	Glutaminase kidney isoform, mitochondrial	Gls	11	5	1.129	561625	634352
Q03265	ATP synthase subunit alpha, mitochondrial	Atp5f1a	88	22	1.128	1.08169e+07	1.21995e+07
P84075	Neuron-specific calcium-binding protein hippocalcin	Hpca	4	1	1.127	245995	277172
O35375	Neuropilin-2	Nrp2	1	1	1.127	36639.3	41282.7
P62746	Rho-related GTP-binding protein RhoB	Rhob	5	3	1.125	112904	127035
Q06185	ATP synthase subunit e, mitochondrial	Atp5me	2	1	1.125	114817	129214
P20357	Microtubule-associated protein 2	Map2	29	12	1.122	818068	918263
P07901	Heat shock protein HSP 90-alpha	Hsp90aa1	29	7	1.113	697173	776136
Q9CPW4	Actin-related protein 2/3 complex subunit 5	Arpc5	4	2	1.109	126775	140581
P63038	60 kDa heat shock protein, mitochondrial	Hspd1	8	5	1.105	93996.3	103833
Q61176	Arginase-1	Arg1	5	2	1.104	192356	212456
Q8BMF4	Dihydrolipoyllysine-residue acetyltransferase component of pyruvate dehydrogenase complex, mitochondrial	Dlat	17	6	1.1	1.14248e+06	1.25645e+06
P62806	Histone H4	H4c1	12	5	1.1	2.20621e+06	2.42584e+06
P48774	Glutathione S-transferase Mu 5	Gstm5	9	2	1.099	126564	139086
Q9CQQ7	ATP synthase F(0) complex subunit B1, mitochondrial	Atp5pb	9	3	1.096	401264	439817
P03995	Glial fibrillary acidic protein	Gfap	91	4	1.091	2.4459e+07	2.66762e+07
P27773	Protein disulfide-isomerase A3	Pdia3	4	3	1.089	88552.6	96466.6
P08553	Neurofilament medium polypeptide	Nefm	37	12	1.087	2.14411e+06	2.33002e+06
P27600	Guanine nucleotide-binding protein subunit alpha-12	Gna12	9	1	1.085	924320	1.00295e+06
Q60668	Heterogeneous nuclear ribonucleoprotein D0	Hnrnpd	1	1	1.082	82764	89567.9
O08553	Dihydropyrimidinase-related protein 2	Dpysl2	90	14	1.081	5.86719e+06	6.34363e+06
P40142	Transketolase	Tkt	26	10	1.08	1.51094e+06	1.63197e+06
P15105	Glutamine synthetase	Glul	49	12	1.077	3.91124e+06	4.21402e+06
Q91ZA3	Propionyl-CoA carboxylase alpha chain, mitochondrial	Pcca	657	54	1.071	2.54819e+08	2.72894e+08
P63017	Heat shock cognate 71 kDa protein	Hspa8	77	19	1.071	6.16245e+06	6.59829e+06
Q8CHC4	Synaptojanin-1	Synj1	10	6	1.07	214984	230034
Q9CR68	Cytochrome b-c1 complex subunit Rieske, mitochondrial	Uqcrfs1	8	2	1.066	357452	380998
P28661	Septin-4	Septin4	3	1	1.065	159412	169713
P35486	Pyruvate dehydrogenase E1 component subunit alpha, somatic form, mitochondrial	Pdha1	59	17	1.062	3.38243e+06	3.59212e+06
P17182	Alpha-enolase	Eno1	39	9	1.06	4.22921e+06	4.48473e+06
O35098	Dihydropyrimidinase-related protein 4	Dpysl4	4	2	1.054	51017.6	53772.6
Q4V9Z5	Seizure 6-like protein 2	Sez6l2	1	1	1.053	22429.1	23622.1
P14152	Malate dehydrogenase, cytoplasmic	Mdh1	24	6	1.049	1.98909e+06	2.08658e+06
Q9Z2I9	Succinate--CoA ligase	Sucla2	2	1	1.039	69838.5	72565.6
P59999	Actin-related protein 2/3 complex subunit 4	Arpc4	10	4	1.038	532124	552552
O88935	Synapsin-1	Syn1	23	10	1.033	1.4296e+06	1.47738e+06
Q8VDQ8	NAD-dependent protein deacetylase sirtuin-2	Sirt2	16	5	1.032	649643	670155
P17183	Gamma-enolase	Eno2	41	7	1.029	1.58878e+06	1.63509e+06
P08551	Neurofilament light polypeptide	Nefl	20	6	1.029	390247	401711
P18760	Cofilin-1	Cfl1	13	5	1.029	1.15798e+06	1.19139e+06
P31324	cAMP-dependent protein kinase type II-beta regulatory subunit	Prkar2b	6	3	1.017	226585	230373
Q8BKG3	Inactive tyrosine-protein kinase 7	Ptk7	1	1	1.014	36424.2	36950
P21550	Beta-enolase	Eno3	19	1	1.004	301597	302897
O55131	Septin-7	Septin7	4	3	1.002	206048	206547
P05201	Aspartate aminotransferase, cytoplasmic	Got1	67	18	1	6.56256e+06	6.56389e+06
Q9D8N0	Elongation factor 1-gamma	Eef1g	1	1	0.999	92828.3	92721.3
Q7TSF1	Desmoglein-1-beta	Dsg1b	2	1	0.998	137893	137566
P08249	Malate dehydrogenase, mitochondrial	Mdh2	69	15	0.996	9.35553e+06	9.3216e+06
P68369	Tubulin alpha-1A chain	Tuba1a	205	7	0.995	4.43546e+07	4.41282e+07
P35279	Ras-related protein Rab-6A	Rab6a	6	2	0.986	186179	183620
Q91WS0	CDGSH iron-sulfur domain-containing protein 1	Cisd1	6	2	0.98	53215.6	52169.8
Q61792	LIM and SH3 domain protein 1	Lasp1	9	3	0.974	298299	290419
P48758	Carbonyl reductase	Cbr1	5	1	0.973	161502	157117
Q62420	Endophilin-A1	Sh3gl2	4	2	0.971	56882.7	55232.7
P09671	Superoxide dismutase	Sod2	6	3	0.97	717746	696257
P68368	Tubulin alpha-4A chain	Tuba4a	188	6	0.961	3.1074e+06	2.98467e+06
Q9CZU6	Citrate synthase, mitochondrial	Cs	9	3	0.957	649061	621085
Q6Q477	Plasma membrane calcium-transporting ATPase 4	Atp2b4	18	1	0.952	58141.7	55372.8
Q60932	Voltage-dependent anion-selective channel protein 1	Vdac1	37	12	0.949	4.6248e+06	4.38946e+06
Q99KB8	Hydroxyacylglutathione hydrolase, mitochondrial	Hagh	1	1	0.941	47464.7	44658.2
Q05920	Pyruvate carboxylase, mitochondrial	Pc	665	61	0.94	2.66556e+08	2.50552e+08
Q99MR8	Methylcrotonoyl-CoA carboxylase subunit alpha, mitochondrial	Mccc1	193	38	0.935	3.18136e+07	2.97488e+07
Q9CQ69	Cytochrome b-c1 complex subunit 8	Uqcrq	1	1	0.933	109111	101790
Q571F8	Glutaminase liver isoform, mitochondrial	Gls2	2	1	0.931	133531	124349
P30275	Creatine kinase U-type, mitochondrial	Ckmt1	14	6	0.928	504666	468417
Q99P72	Reticulon-4	Rtn4	2	1	0.923	98964.7	91355.2
Q9DB20	ATP synthase subunit O, mitochondrial	Atp5po	7	2	0.922	251828	232195
Q62188	Dihydropyrimidinase-related protein 3	Dpysl3	36	3	0.915	486298	444743
P19783	Cytochrome c oxidase subunit 4 isoform 1, mitochondrial	Cox4i1	16	5	0.911	994632	906459
P60904	DnaJ homolog subfamily C member 5	Dnajc5	1	1	0.909	137868	125300
Q04447	Creatine kinase B-type	Ckb	42	13	0.908	6.85073e+06	6.21939e+06
P50518	V-type proton ATPase subunit E 1	Atp6v1e1	8	2	0.907	466118	422955
P56480	ATP synthase subunit beta, mitochondrial	Atp5f1b	56	11	0.904	4.21715e+06	3.81292e+06
P28652	Calcium/calmodulin-dependent protein kinase type II subunit beta	Camk2b	45	4	0.904	342312	309419
Q9QY76	Vesicle-associated membrane protein-associated protein B	Vapb	2	1	0.903	60909.9	55031.8
P97300	Neuroplastin	Nptn	26	8	0.9	1.59959e+07	1.43984e+07
P10853	Histone H2B type 1-F/J/L	H2bc7	17	3	0.898	3.06214e+06	2.75083e+06
Q9R1P4	Proteasome subunit alpha type-1	Psma1	1	1	0.897	130207	116835
Q9CQC7	NADH dehydrogenase	Ndufb4	2	1	0.893	62468.9	55772.3
Q68FL4	Putative adenosylhomocysteinase 3	Ahcyl2	1	1	0.891	227547	202786
Q9R1S8	Calpain-7	Capn7	3	1	0.885	370457	328005
P05202	Aspartate aminotransferase, mitochondrial	Got2	98	22	0.878	1.77448e+07	1.5577e+07
Q9CQE1	Protein NipSnap homolog 3B	Nipsnap3b	2	2	0.871	67913.8	59165.7
P61264	Syntaxin-1B	Stx1b	11	4	0.869	774442	672682
P97333	Neuropilin-1	Nrp1	4	3	0.848	6.38455e+06	5.41464e+06
Q8VEK3	Heterogeneous nuclear ribonucleoprotein U	Hnrnpu	2	1	0.847	96921.2	82118.4
P51150	Ras-related protein Rab-7a	Rab7a	6	2	0.845	265264	224167
Q8K310	Matrin-3	Matr3	1	1	0.843	58313.8	49158.3
P97315	Cysteine and glycine-rich protein 1	Csrp1	8	2	0.832	369482	307424
Q61220	Protein kinase C-binding protein NELL2	Nell2	1	1	0.829	19558.4	16209.7
Q02257	Junction plakoglobin	Jup	42	14	0.823	2.62733e+06	2.16212e+06
Q5SWU9	Acetyl-CoA carboxylase 1	Acaca	180	45	0.82	1.37774e+07	1.12971e+07
O35737	Heterogeneous nuclear ribonucleoprotein H	Hnrnph1	2	2	0.814	85120	69288.7
P07356	Annexin A2	Anxa2	9	4	0.812	153525	124712
P97447	Four and a half LIM domains protein 1	Fhl1	5	2	0.806	355246	286199
P46660	Alpha-internexin	Ina	37	11	0.804	1.5275e+06	1.2277e+06
Q9JKP5	Muscleblind-like protein 1	Mbnl1	14	1	0.799	6.68611e+09	5.34285e+09
Q91XY4	Protocadherin gamma-A4	Pcdhga4	2	1	0.777	32549.6	25276.5
P0DP27	Calmodulin-2	Calm2	11	3	0.767	444799	341219
P05063	Fructose-bisphosphate aldolase C	Aldoc	44	8	0.674	1.04019e+06	700760
Q920N2	Biotin--protein ligase	Hlcs	5	2	0.668	79159	52910.5
Q9JKC6	Cell cycle exit and neuronal differentiation protein 1	Cend1	4	2	0.659	266837	175756
Q91VD9	NADH-ubiquinone oxidoreductase 75 kDa subunit, mitochondrial	Ndufs1	14	3	0.637	451775	287778
P01869	Ig gamma-1 chain C region, membrane-bound form	Ighg1	11	3	0.607	1.42268e+06	864246
Q9D3D9	ATP synthase subunit delta, mitochondrial	Atp5f1d	1	1	0.597	82557.1	49265.1
Q9JM76	Actin-related protein 2/3 complex subunit 3	Arpc3	3	1	0.592	56129.5	33241.3
P01837	Immunoglobulin kappa constant	Igkc	5	1	0.589	224523	132226
O55143	Sarcoplasmic/endoplasmic reticulum calcium ATPase 2	Atp2a2	13	7	0.536	566349	303295
P08113	Endoplasmin	Hsp90b1	8	2	0.523	148119	77451.2
P28271	Cytoplasmic aconitate hydratase	Aco1	44	16	0.471	4.29654e+06	2.02206e+06
P11276	Fibronectin	Fn1	5	3	0.408	75368.2	30718.3
P62821	Ras-related protein Rab-1A	Rab1A	1	1	0.354	52468.6	18549.2
P0C0S6	Histone H2A.Z	H2az1	20	1	0.219	118884	26075.4
P35293	Ras-related protein Rab-18	Rab18	2	1	0.207	72124.8	14950.5
Q8VCM7	Fibrinogen gamma chain	Fgg	14	7	0.154	1.83172e+06	281429
Q9QXA5	U6 snRNA-associated Sm-like protein LSm4	Lsm4	2	1	0.02	1.08485e+06	21756.4
